# Supplementary material for: Using digital traces to build prospective and real-time county-level early warning systems to anticipate COVID-19 outbreaks in the United States
Source: PubMed Central journal article supplement (PMC9848273; doi:10.1126/sciadv.abq0199), 2023-01-18
Supplement: sciadv.abq0199_sm.pdf [file sciadv.abq0199_sm.pdf]

Supplementary Materials for

**Using digital traces to build prospective and real-time county-level early warning systems to anticipate COVID-19 outbreaks in the United States**

Lucas M. Stolerman *et al.*

Corresponding author: Mauricio Santillana, [m.santillana@northeastern.edu](mailto:m.santillana@northeastern.edu)

*Sci. Adv.* **9**, eabq0199 (2023)  
DOI: 10.1126/sciadv.abq0199

**This PDF file includes:**

Figs. S1 to S286  
Tables S1 to S9

Figures S1-S49.

The probability of resurgence  $P(R_t > 1)$  (in green) and the different events generated by the Naive (gray), Single Source (blue) and Multiple Source methods (orange) at both county and state level.

- Naive Method
- Single Source Method
- Multiple Sources Method
- $P(R_t > 1)$
- Gold Standard Event
- Signal Event
- Initial Training Period
- Gold Standard (JHU Cases)

Weekly Confirmed Cases (AL, Jefferson)

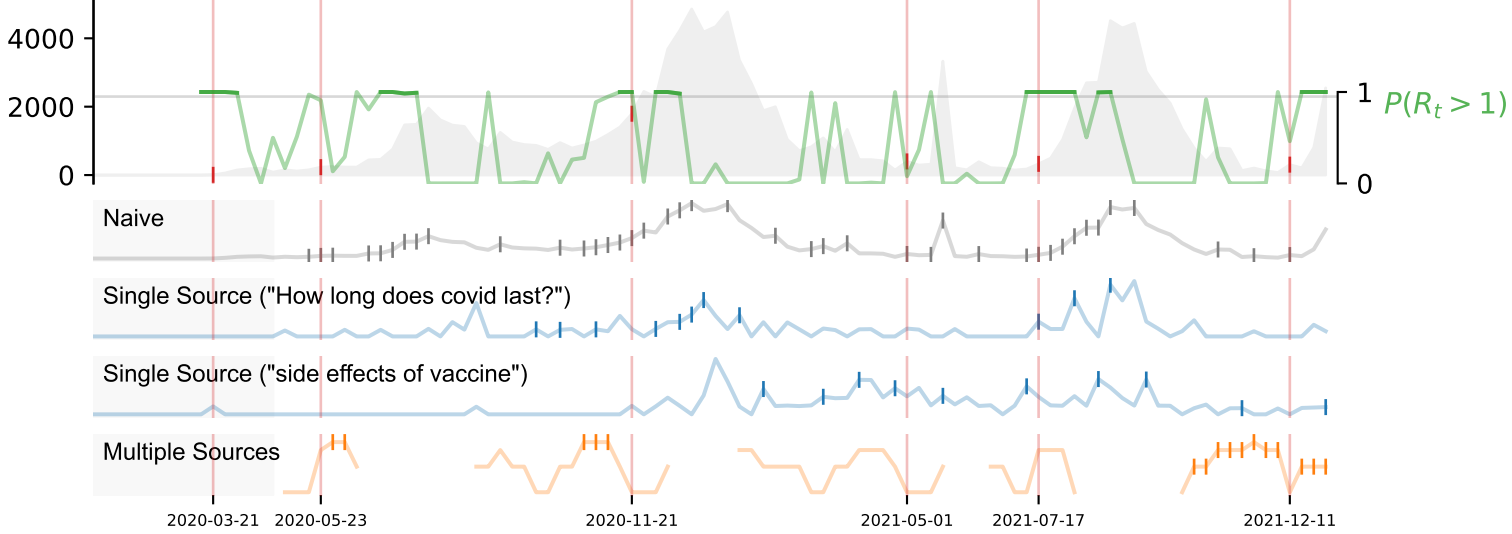

Weekly Confirmed Cases (AL, Madison)

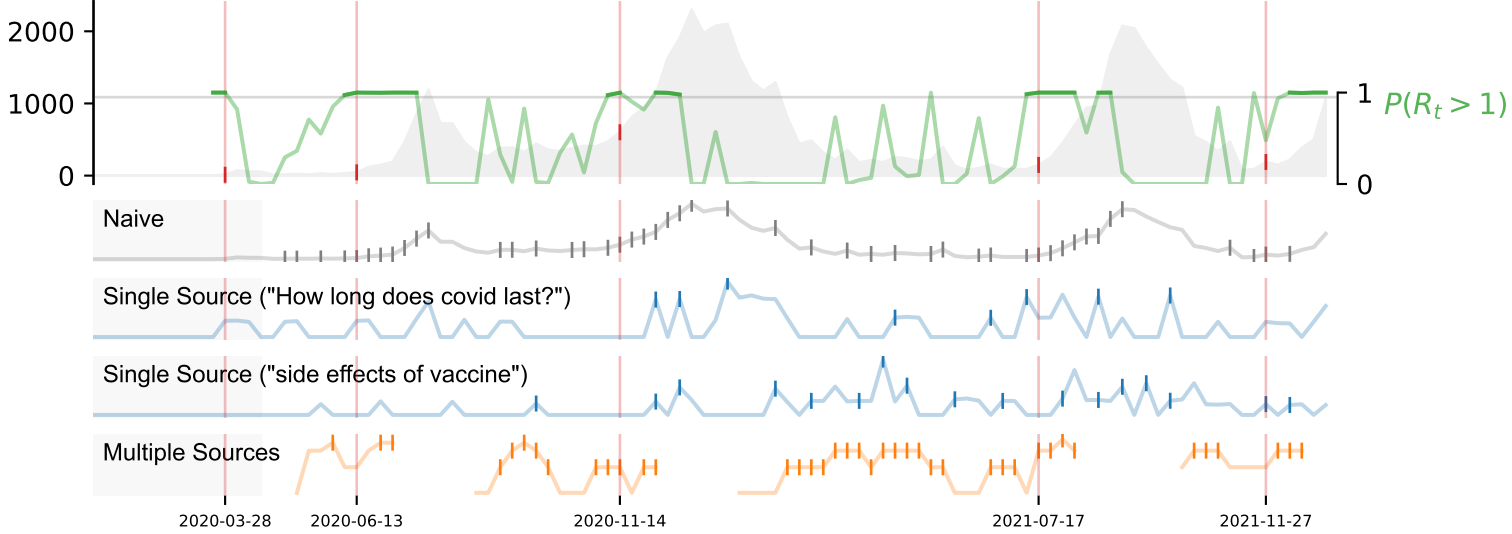

Weekly Confirmed Cases (AR, Pulaski)

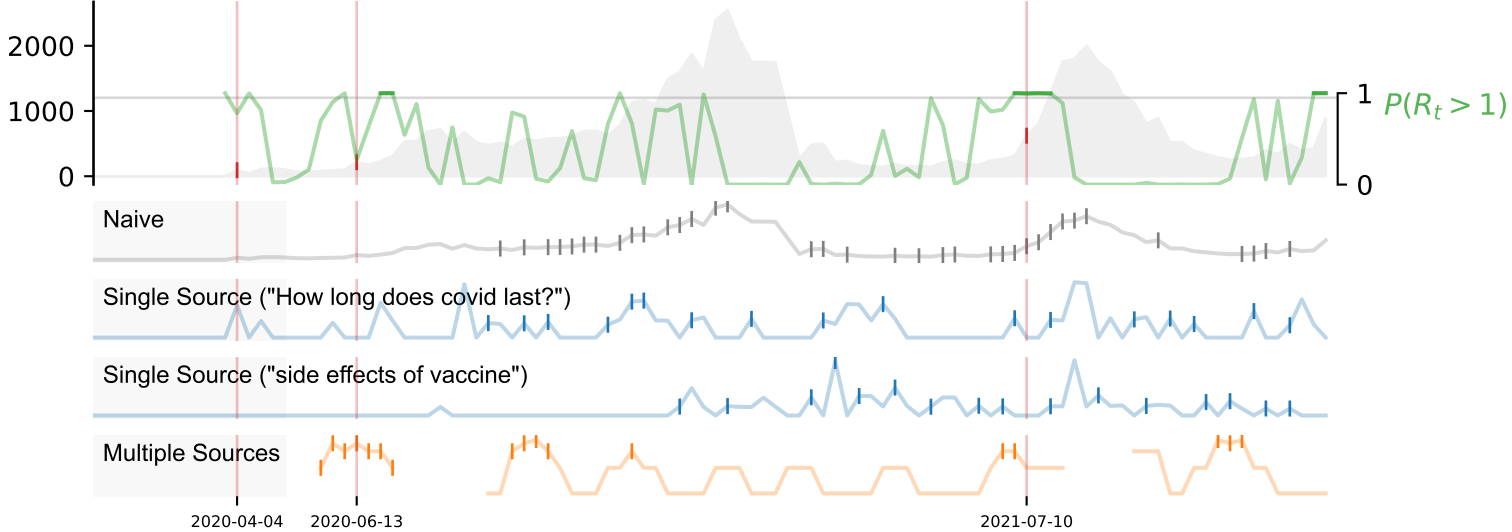

- Naive Method
- Single Source Method
- Multiple Sources Method
- $P(R_t > 1)$
- Gold Standard Event
- Signal Event
- Initial Training Period
- Gold Standard (JHU Cases)

Weekly Confirmed Cases (AZ, Maricopa)

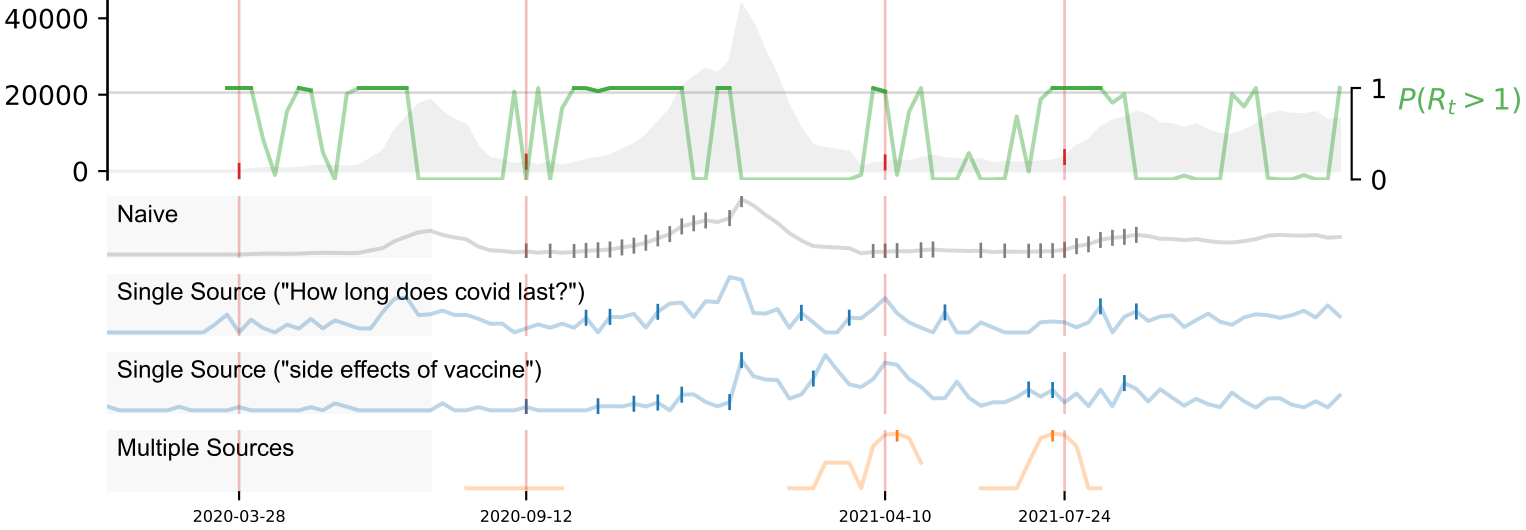

Weekly Confirmed Cases (AZ, Pima)

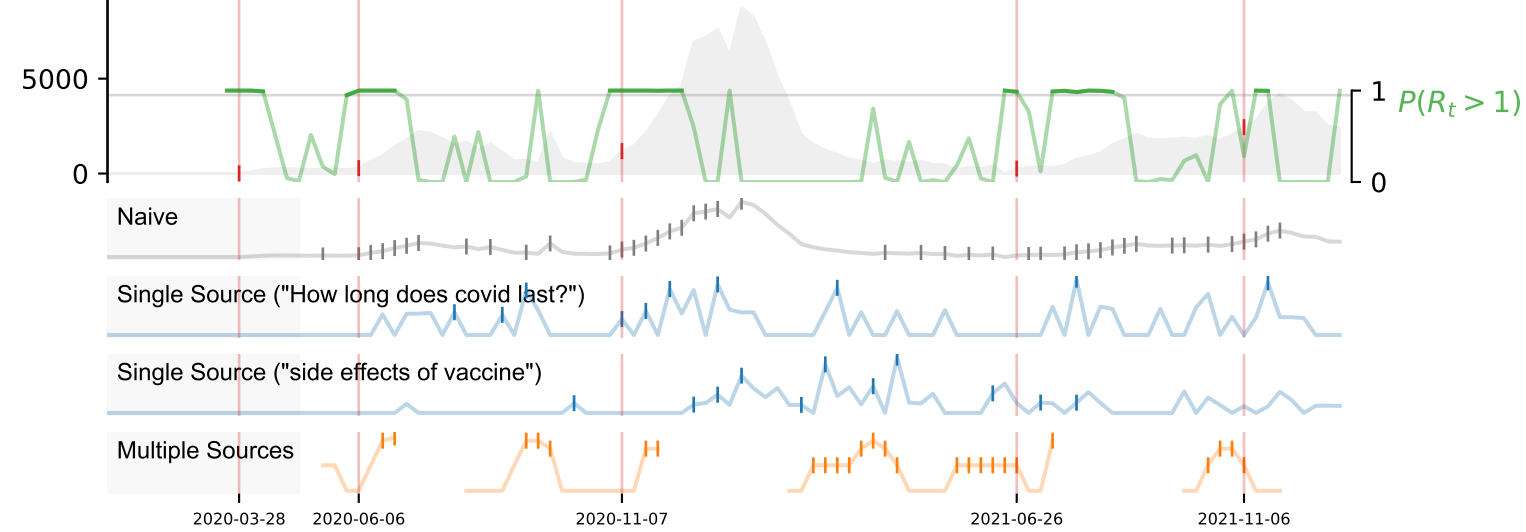

Weekly Confirmed Cases (CA, Alameda)

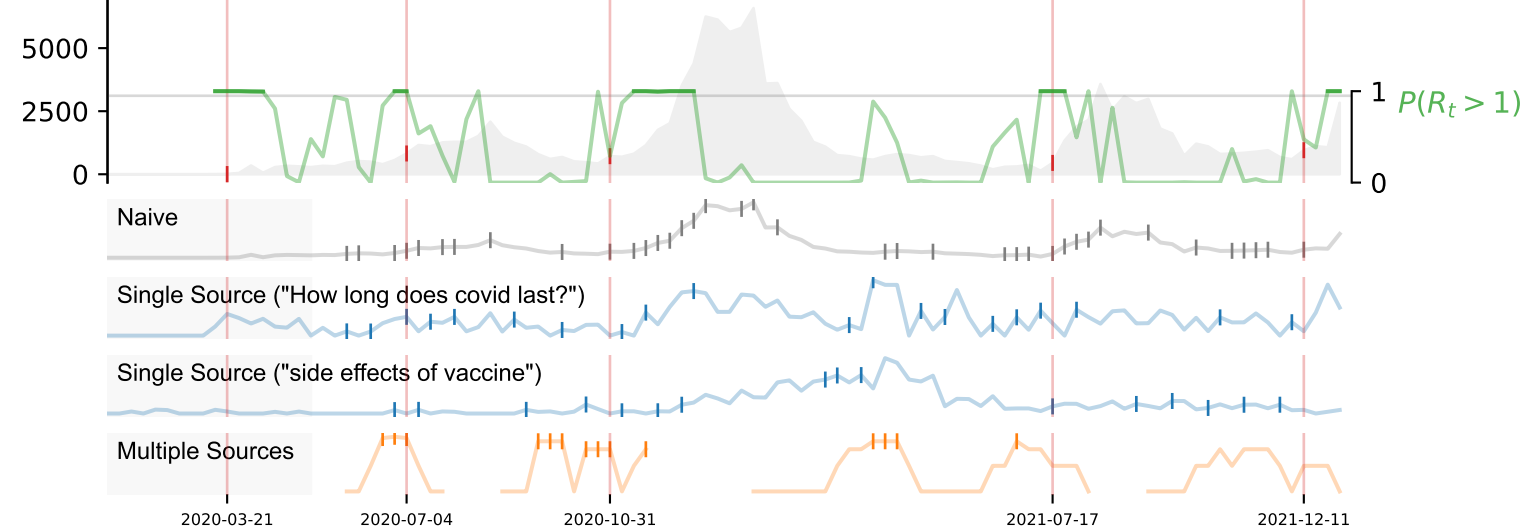



- Naive Method
- Single Source Method
- Multiple Sources Method
- $P(R_t > 1)$
- Gold Standard Event
- Signal Event
- Initial Training Period
- Gold Standard (JHU Cases)

Weekly Confirmed Cases (CA, Contra Costa)

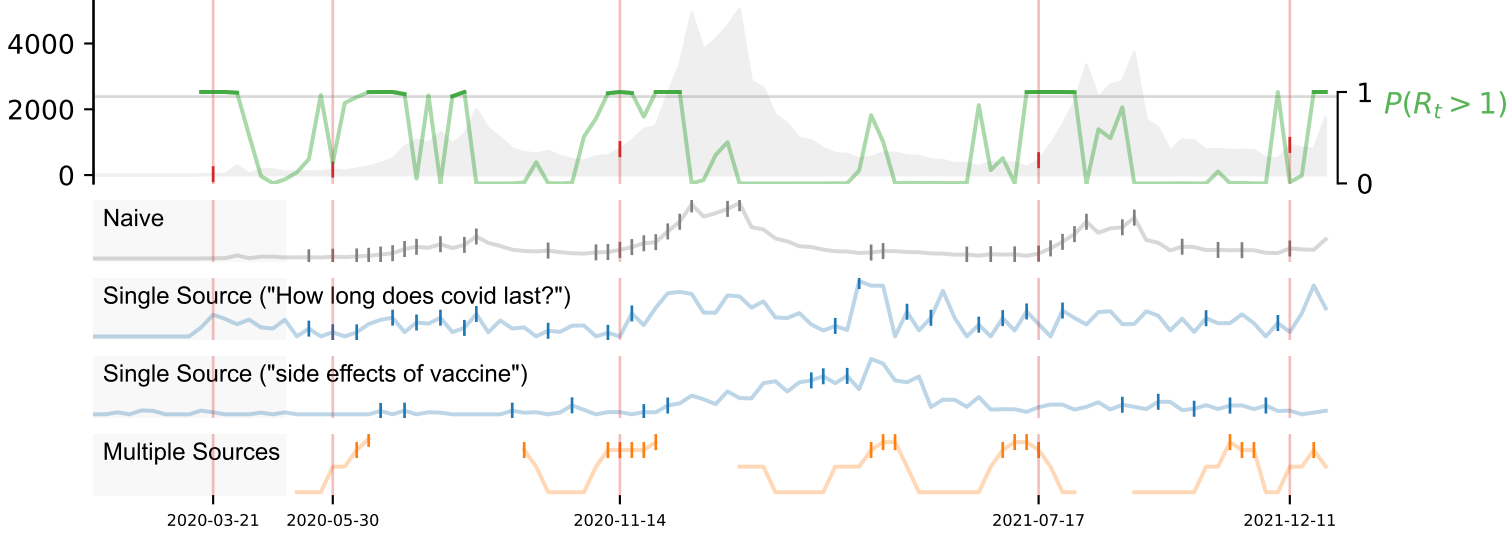

Weekly Confirmed Cases (CA, Los Angeles)

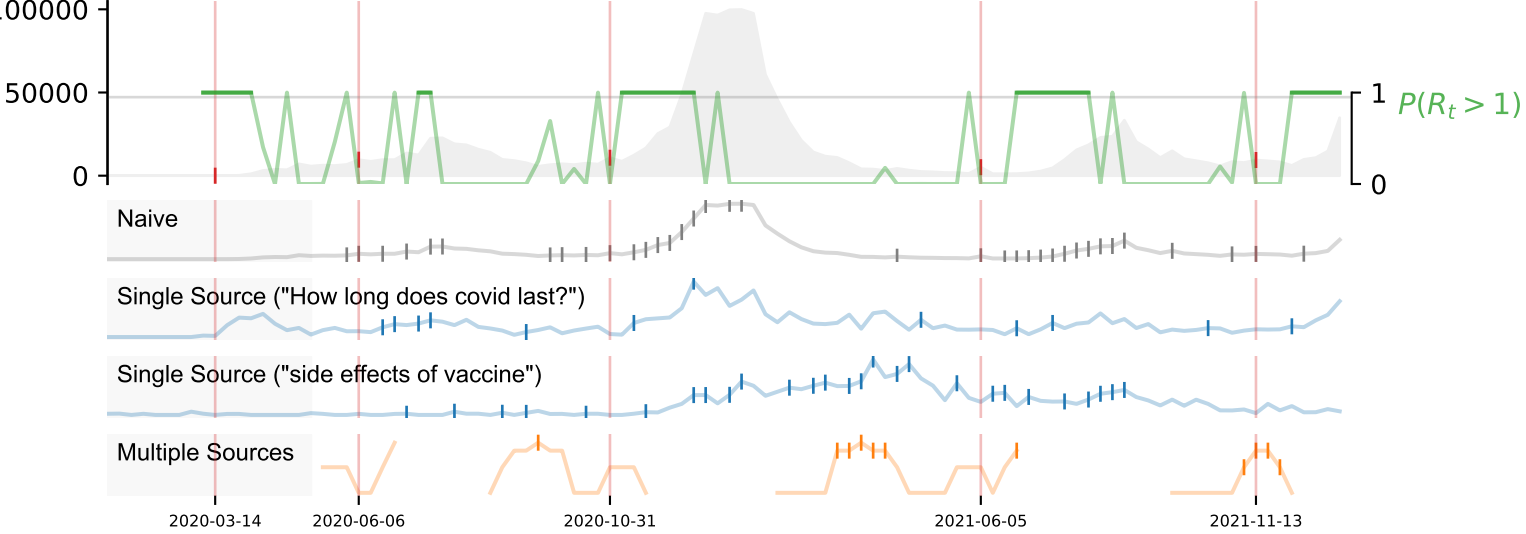

Weekly Confirmed Cases (CA, Orange)

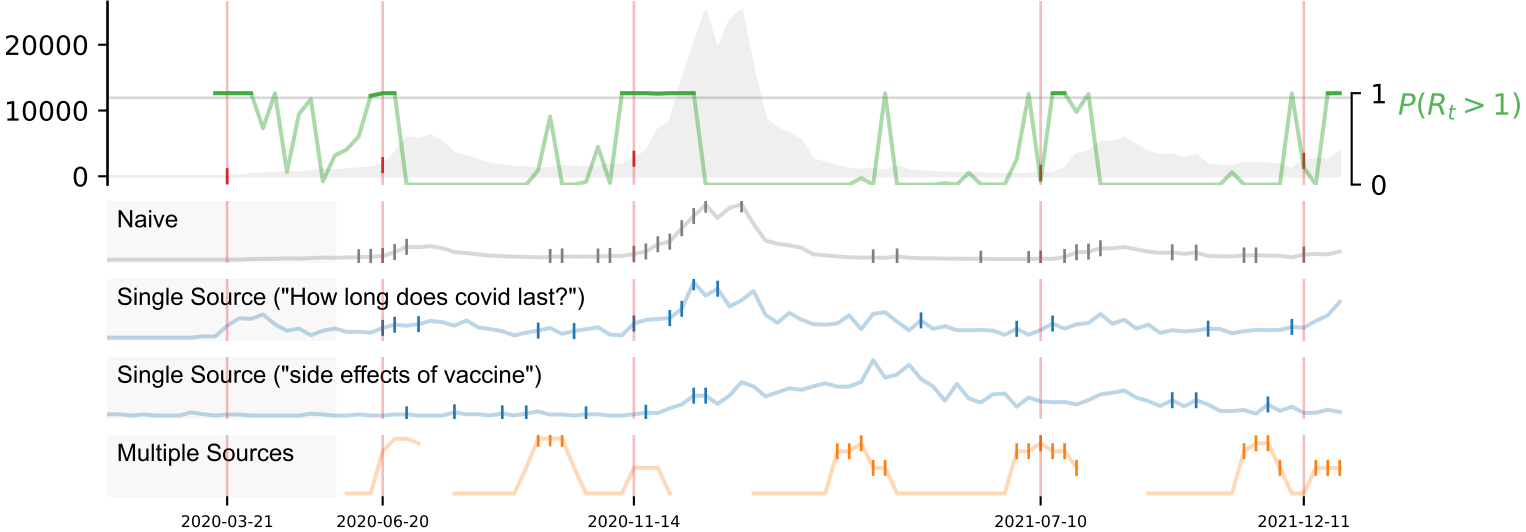

- Naive Method
- Single Source Method
- Multiple Sources Method
- $P(R_t > 1)$
- Gold Standard Event
- Signal Event
- Initial Training Period
- Gold Standard (JHU Cases)

Weekly Confirmed Cases (CA, Riverside)

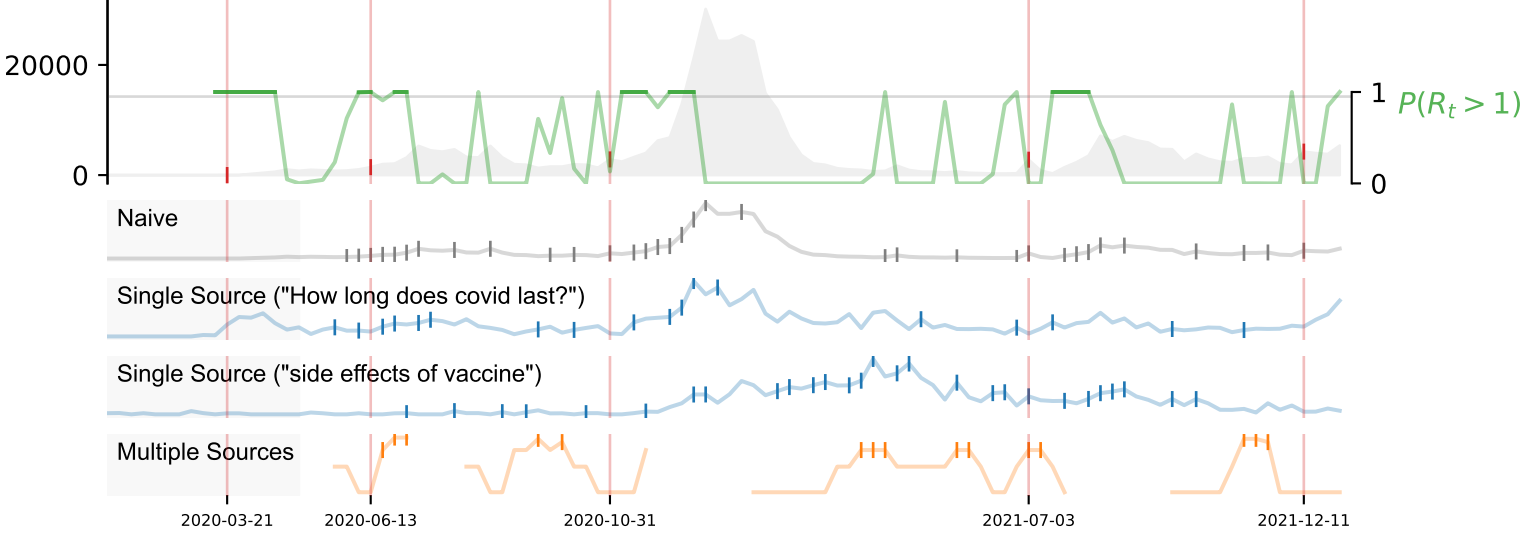

Weekly Confirmed Cases (CA, Sacramento)

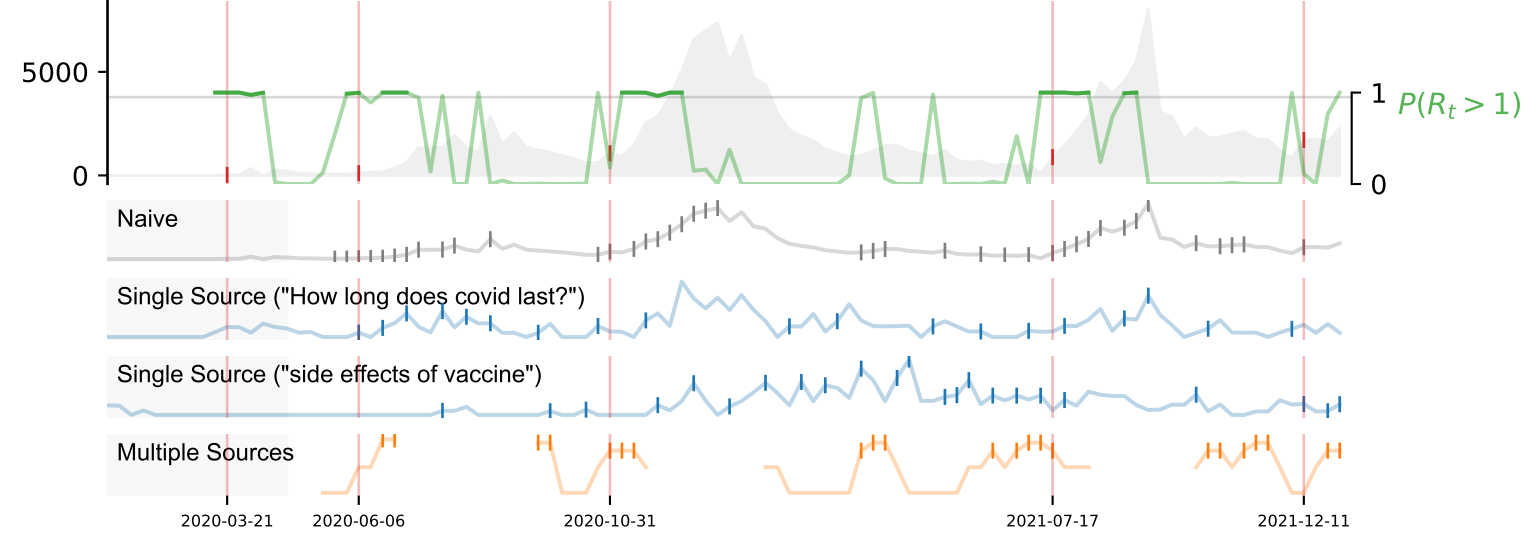

Weekly Confirmed Cases (CA, San Bernardino)

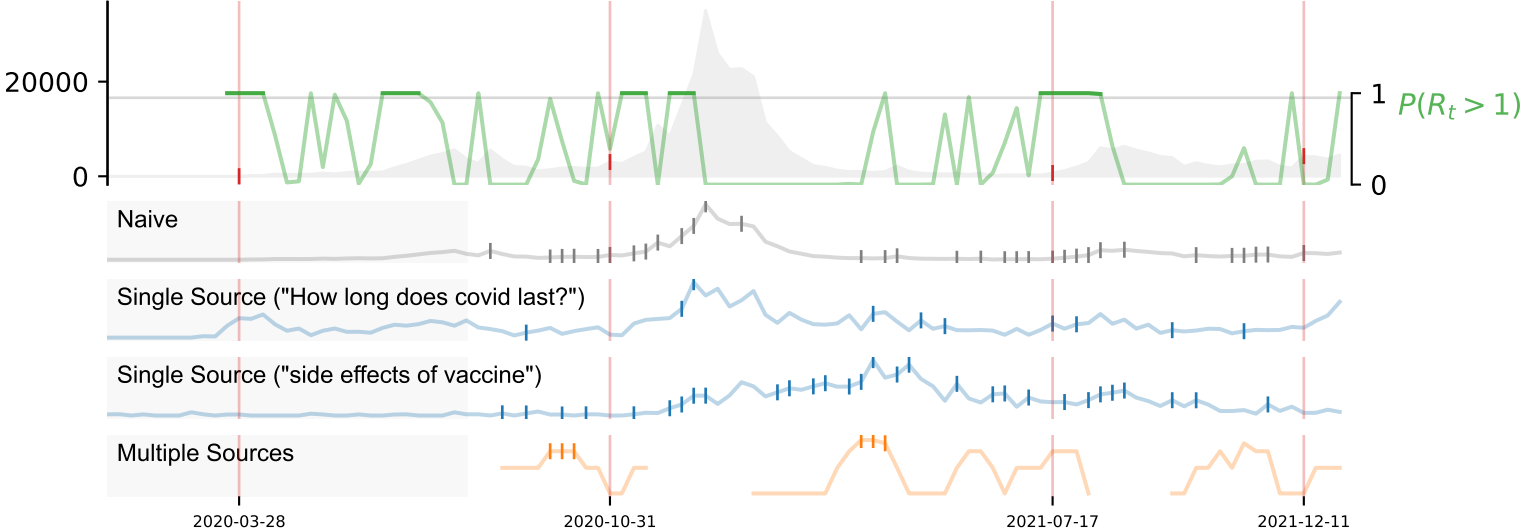

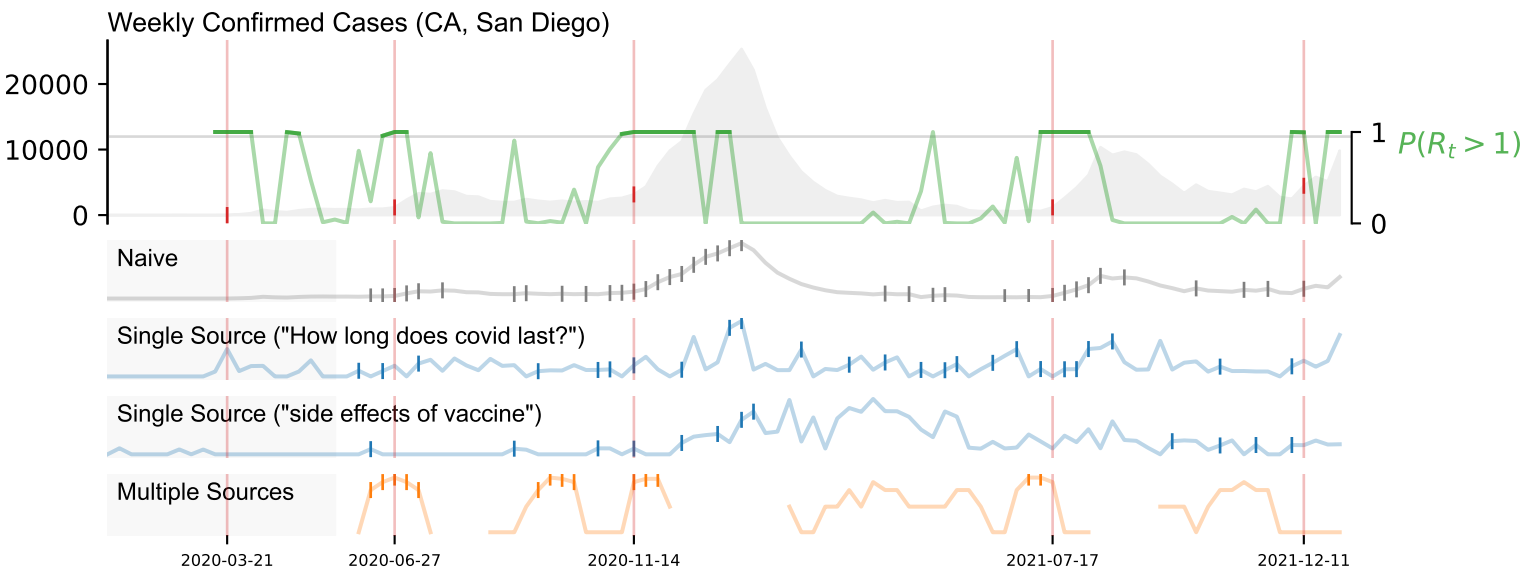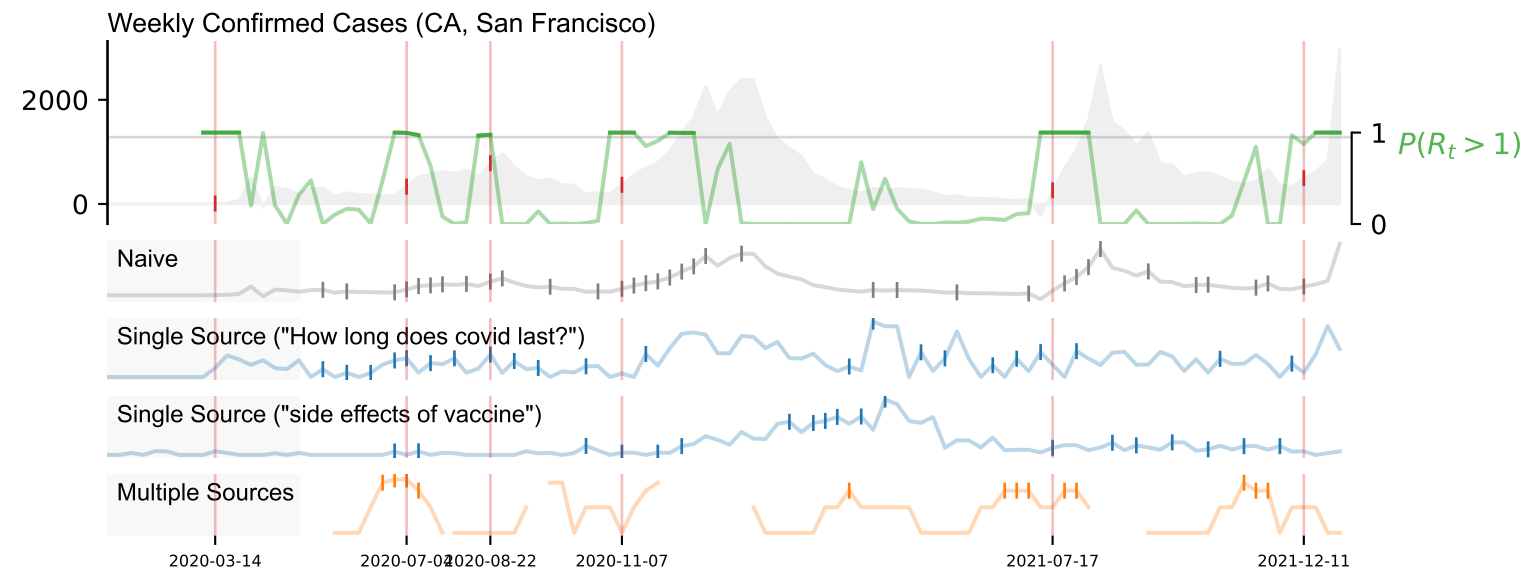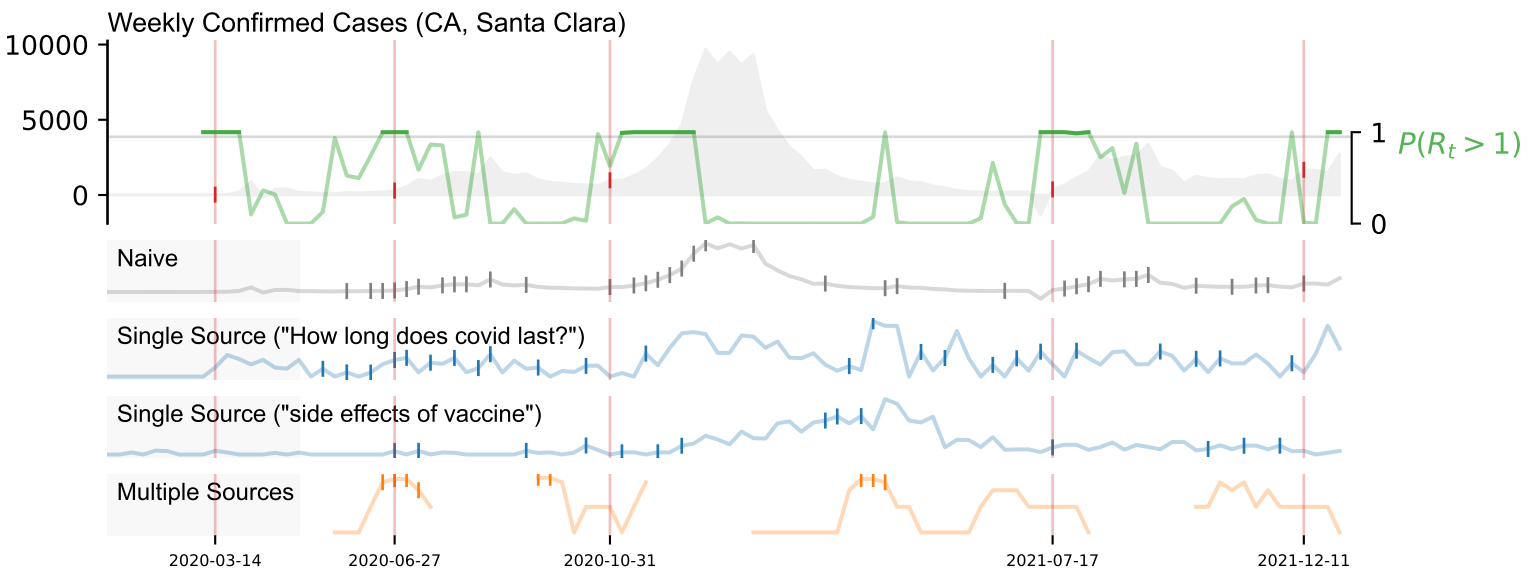

- Naive Method
- Single Source Method
- Multiple Sources Method
- $P(R_t > 1)$
- Gold Standard Event
- Signal Event
- Initial Training Period
- Gold Standard (JHU Cases)

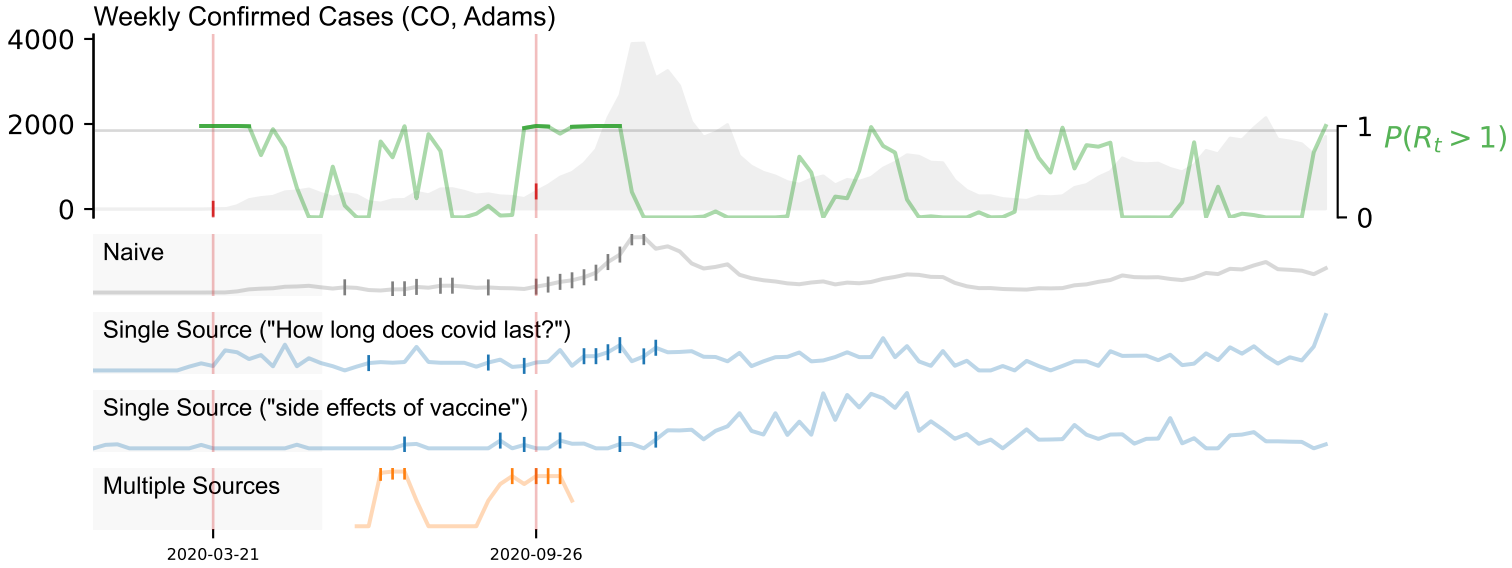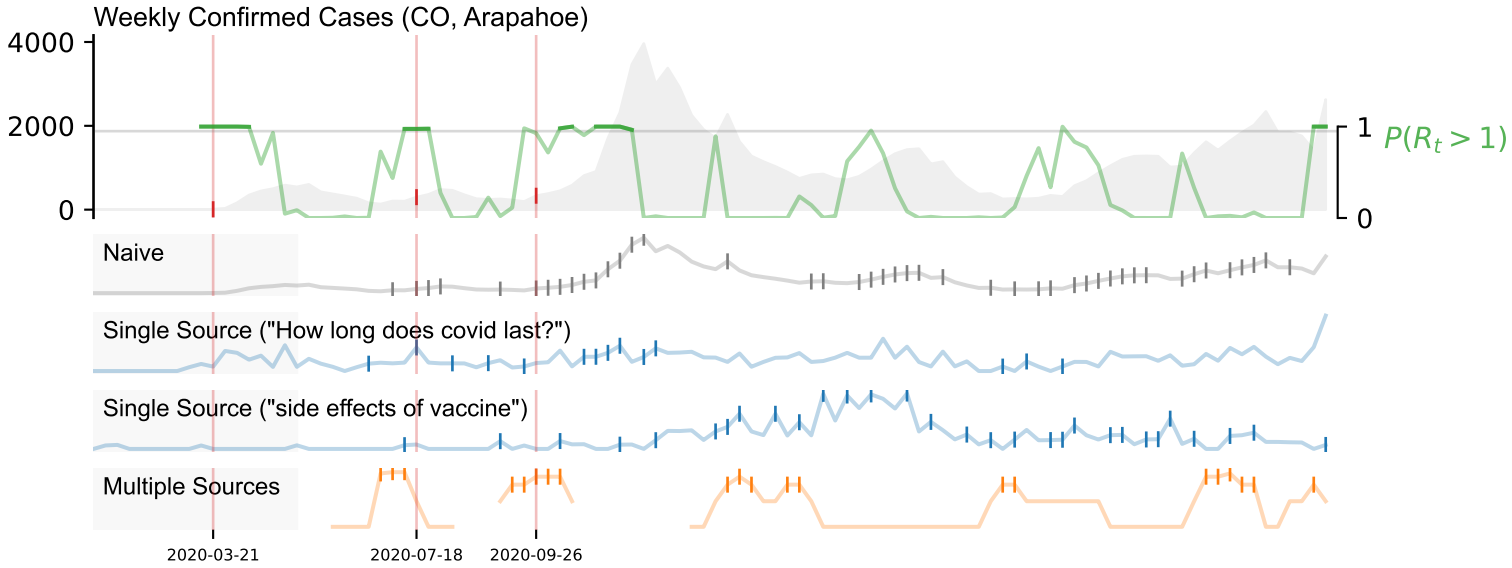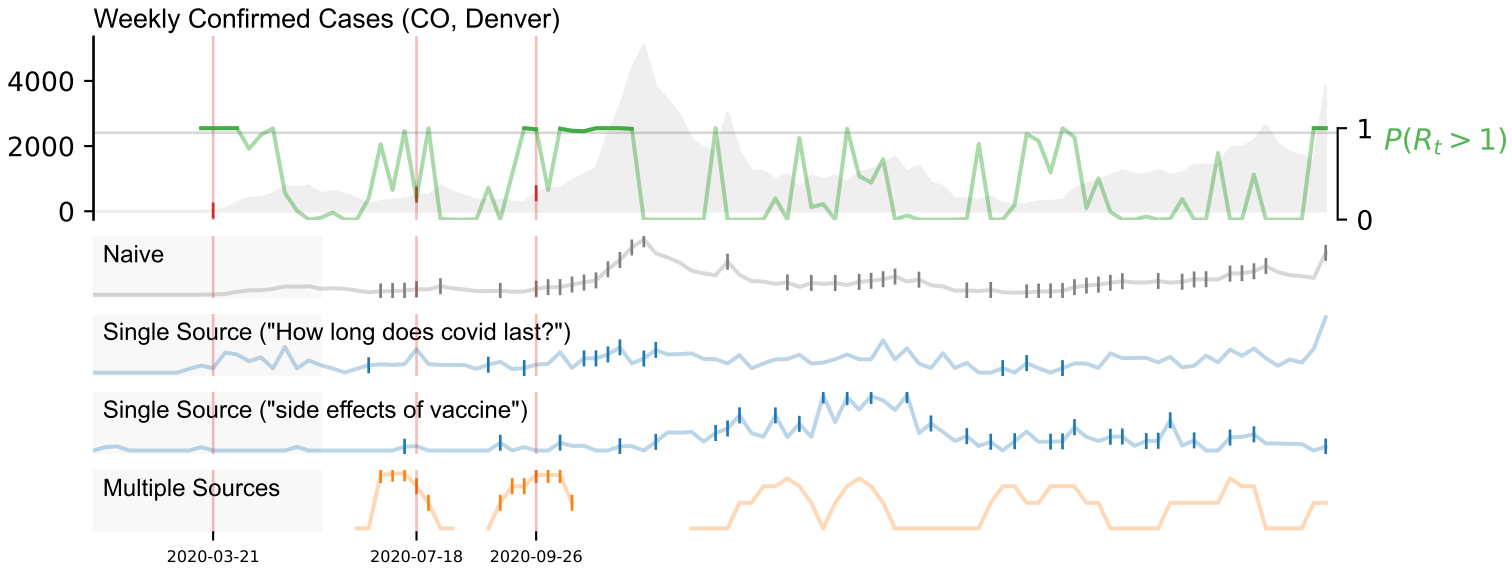

- Naive Method
- Single Source Method
- Multiple Sources Method
- $P(R_t > 1)$
- Gold Standard Event
- Signal Event
- Initial Training Period
- Gold Standard (JHU Cases)

Weekly Confirmed Cases (FL, Alachua)

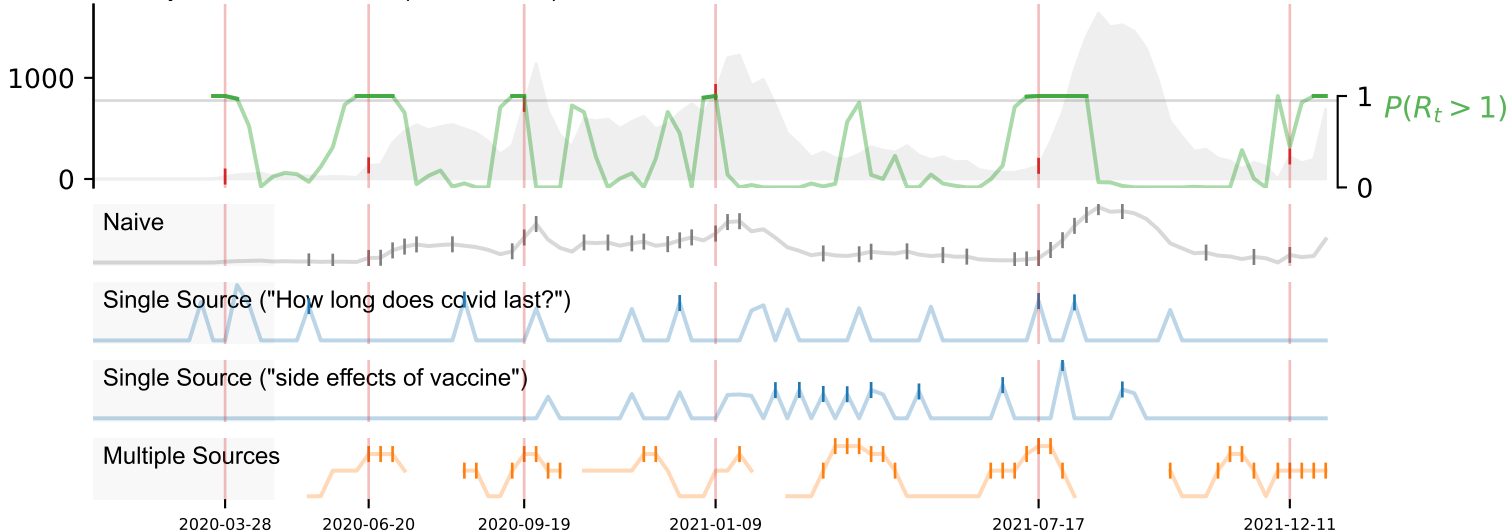

Weekly Confirmed Cases (FL, Broward)

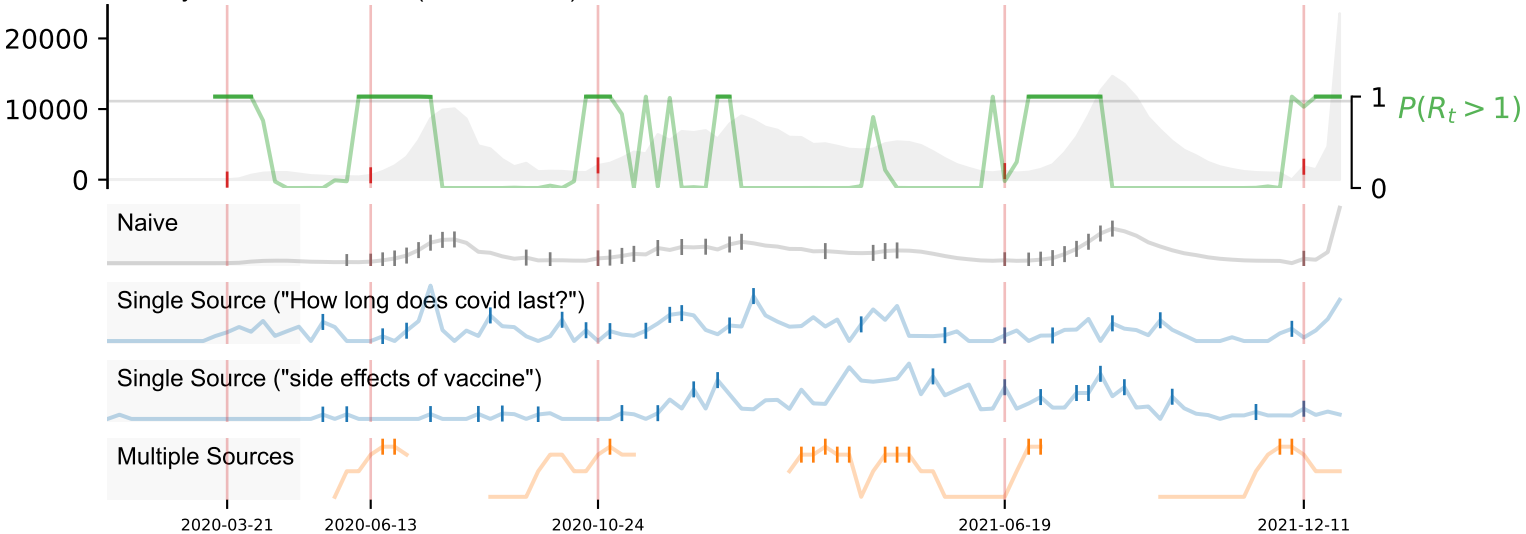

Weekly Confirmed Cases (FL, Hillsborough)

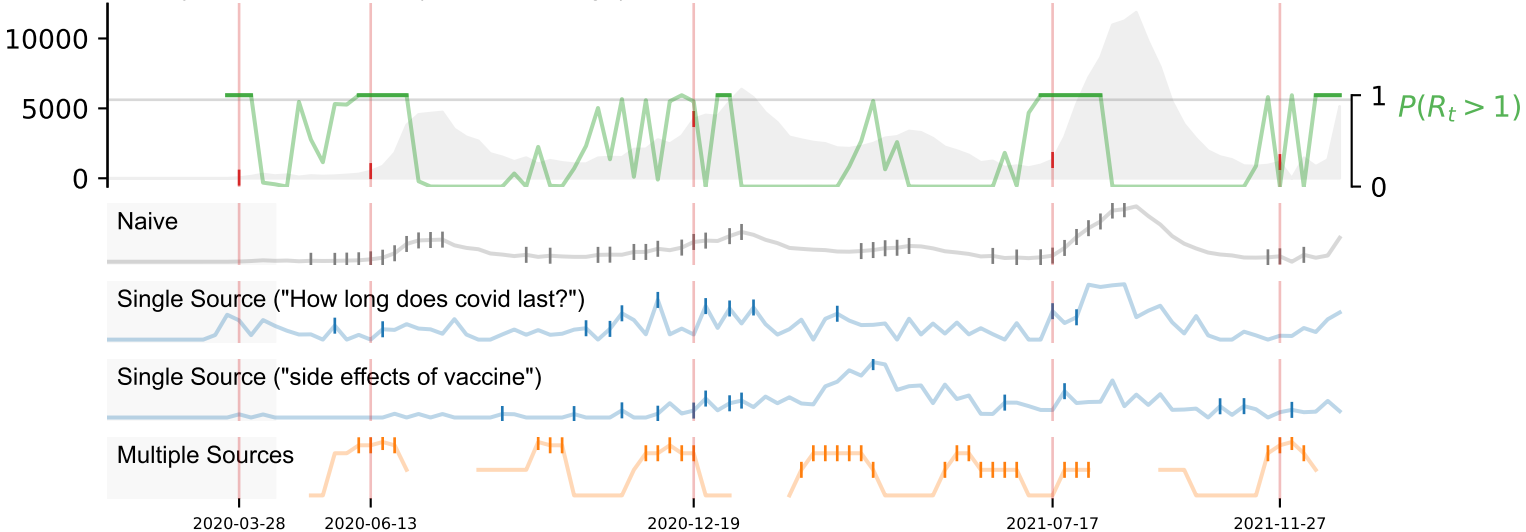

- Naive Method
- Single Source Method
- Multiple Sources Method
- $P(R_t > 1)$
- Gold Standard Event
- Signal Event
- Initial Training Period
- Gold Standard (JHU Cases)

Weekly Confirmed Cases (FL, Lake)

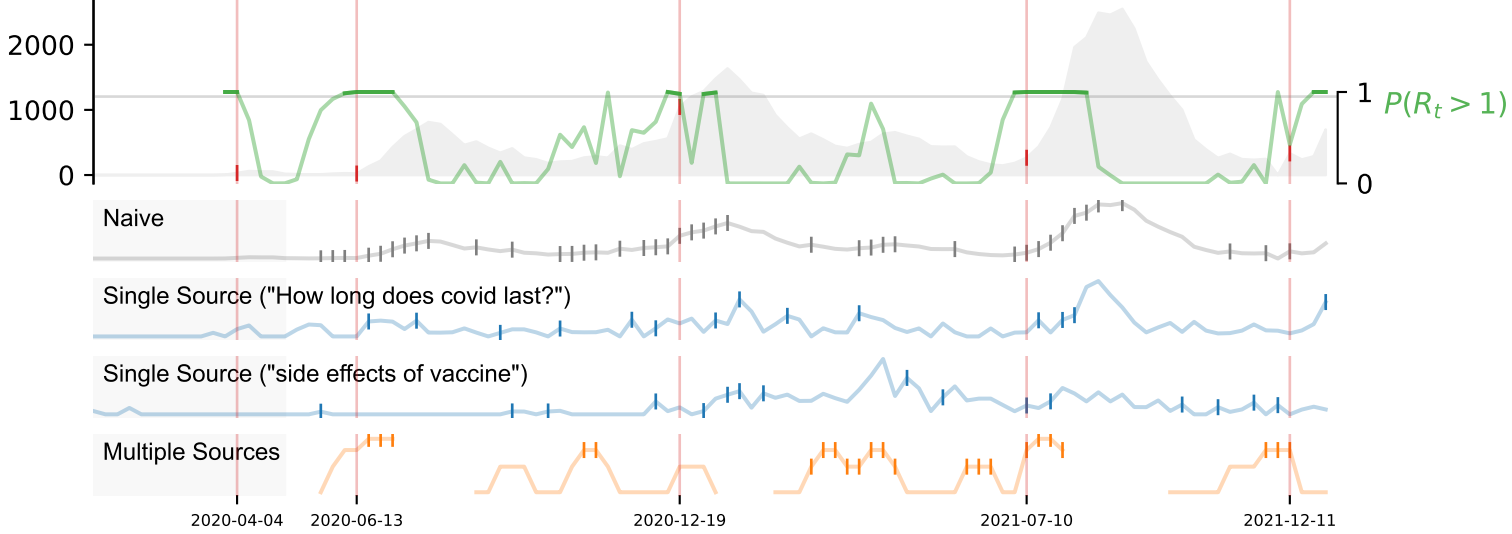

Weekly Confirmed Cases (FL, Marion)

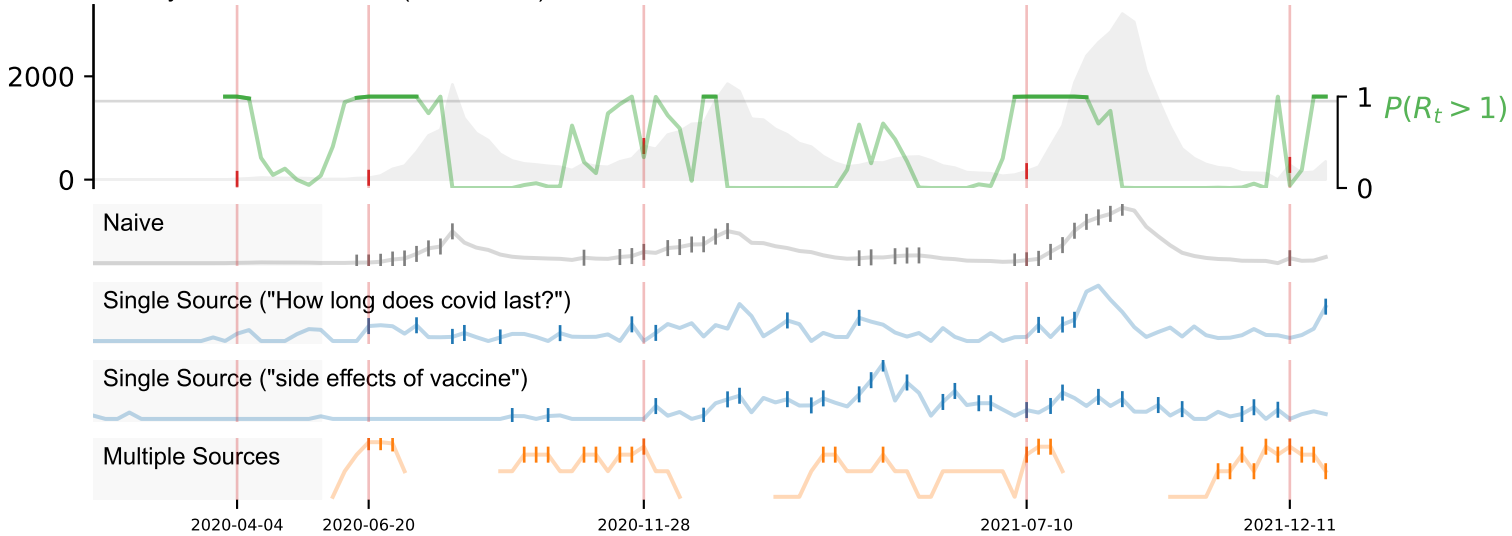

Weekly Confirmed Cases (FL, Miami-Dade)

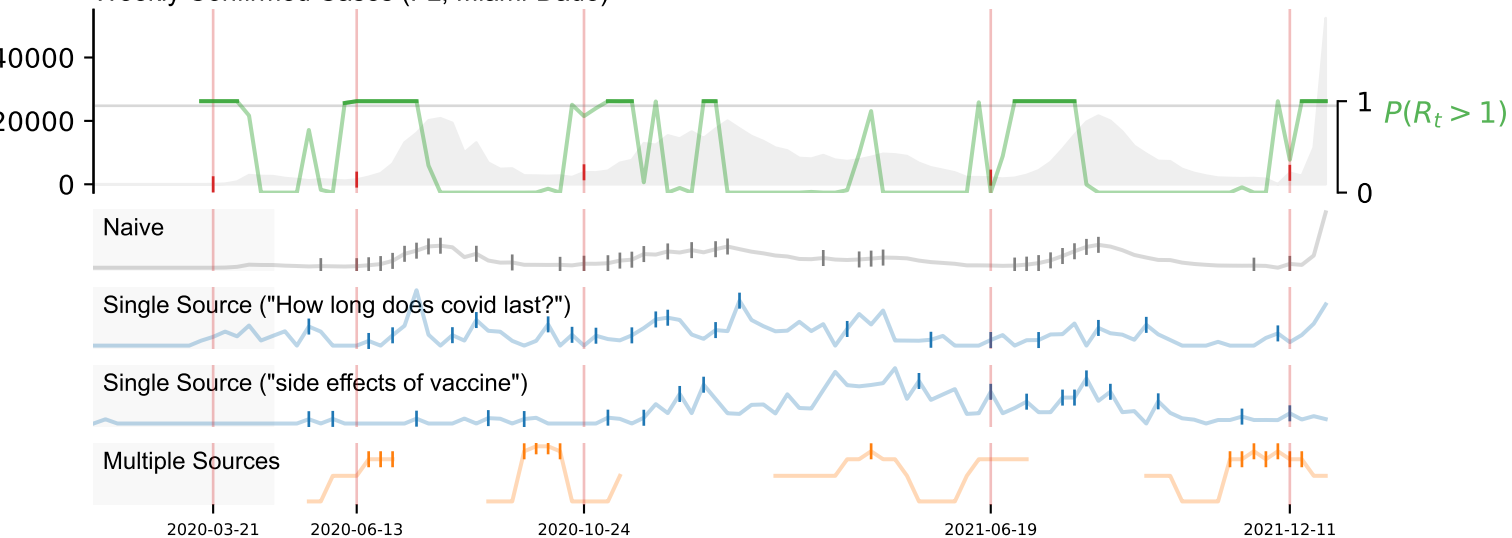

- Naive Method
- Single Source Method
- Multiple Sources Method
- $P(R_t > 1)$
- Gold Standard Event
- Signal Event
- Initial Training Period
- Gold Standard (JHU Cases)

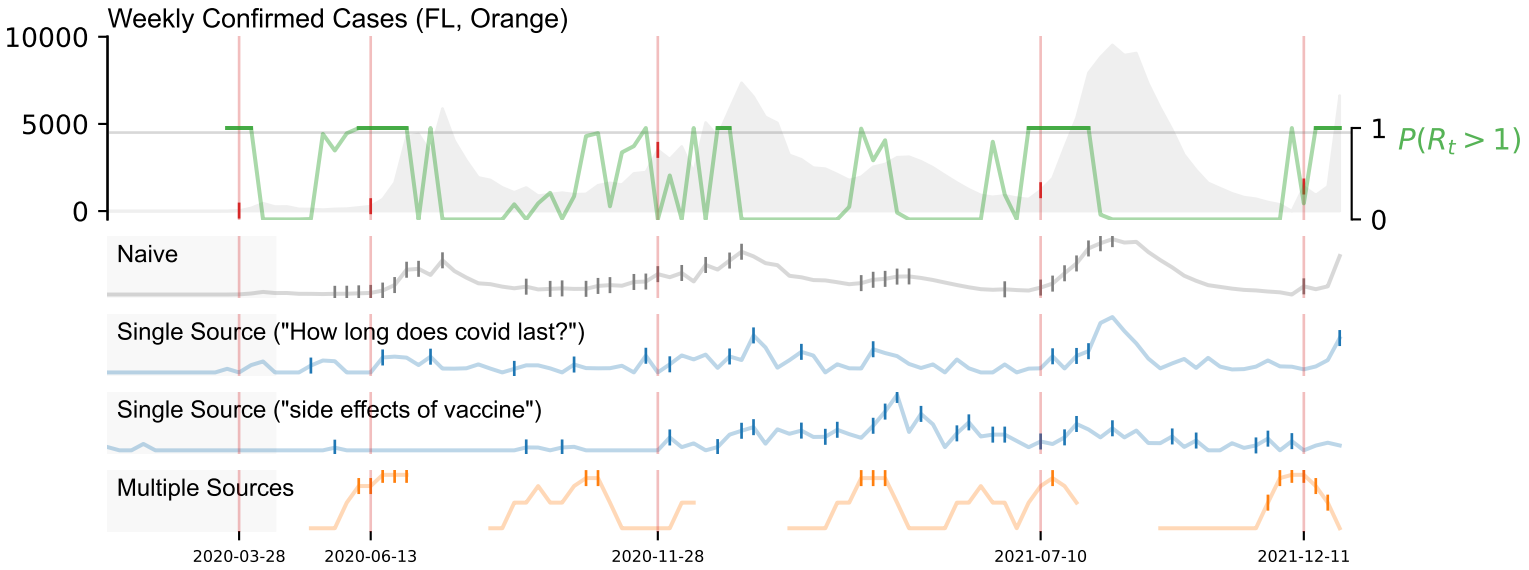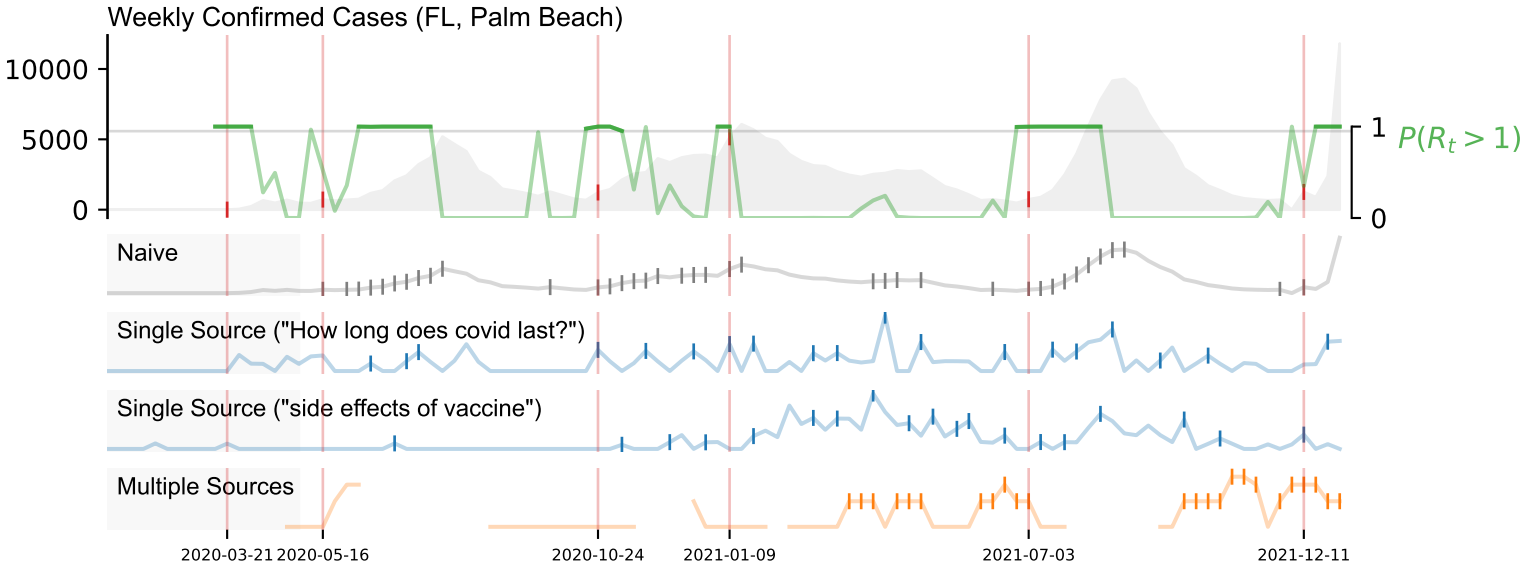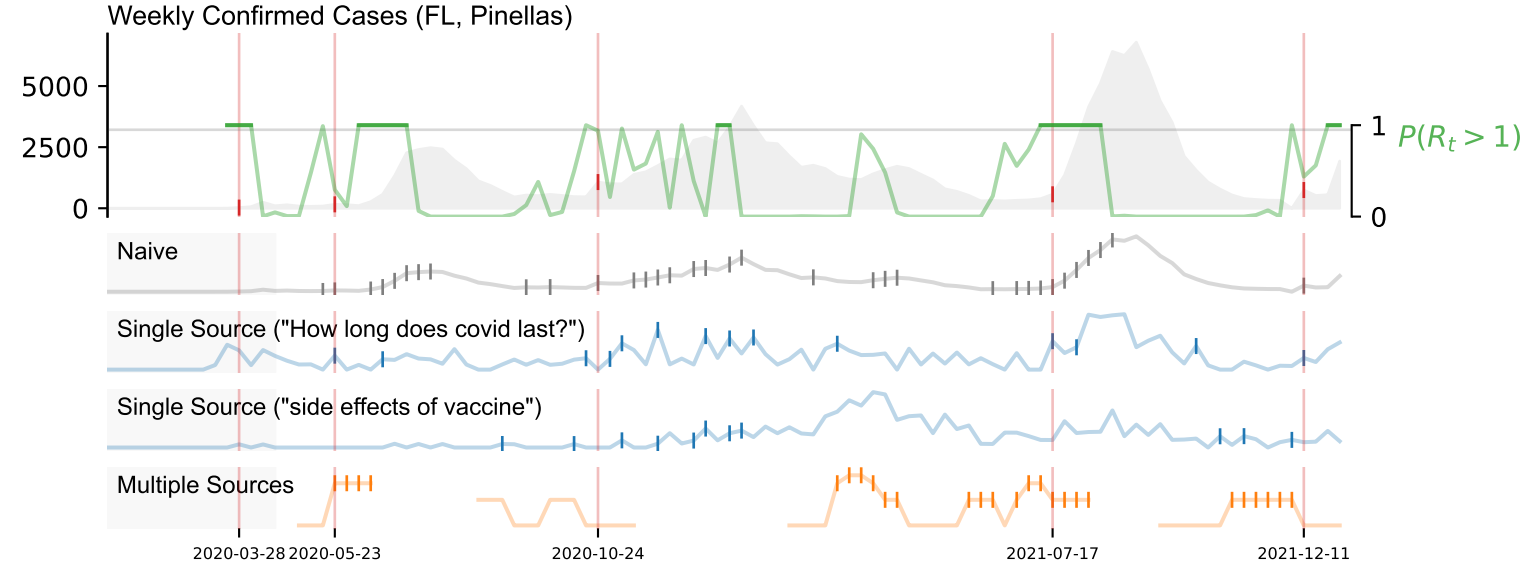

- Naive Method
- Single Source Method
- Multiple Sources Method
- $P(R_t > 1)$
- Gold Standard Event
- Signal Event
- Initial Training Period
- Gold Standard (JHU Cases)

Weekly Confirmed Cases (FL, Sumter)

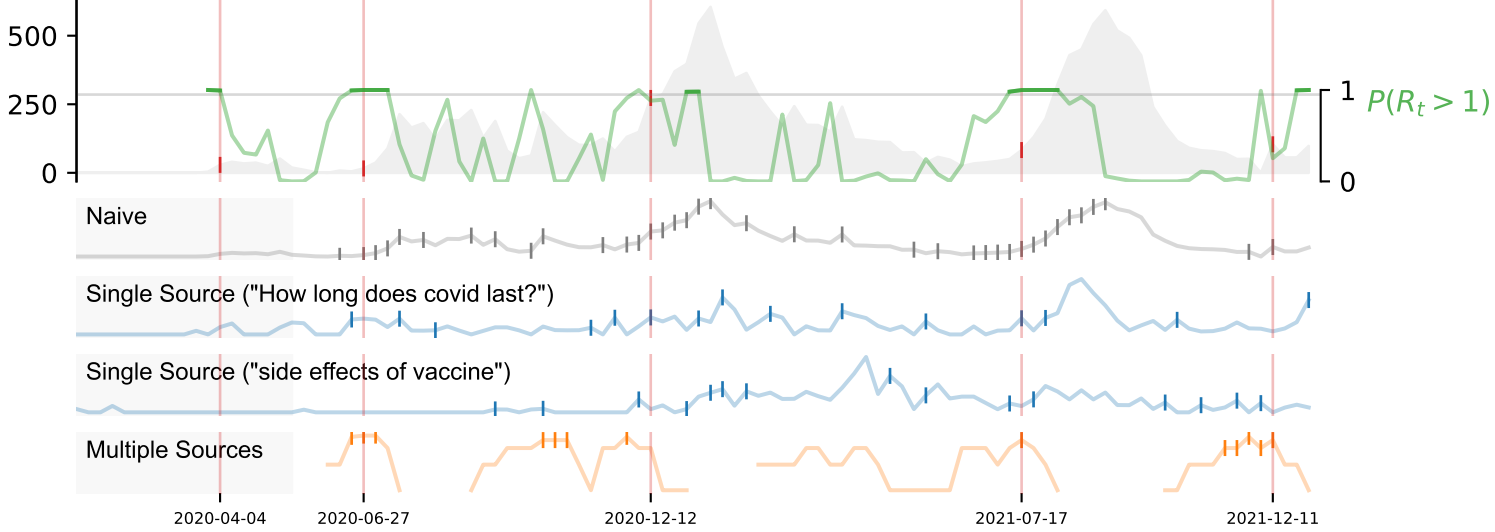

Weekly Confirmed Cases (GA, DeKalb)

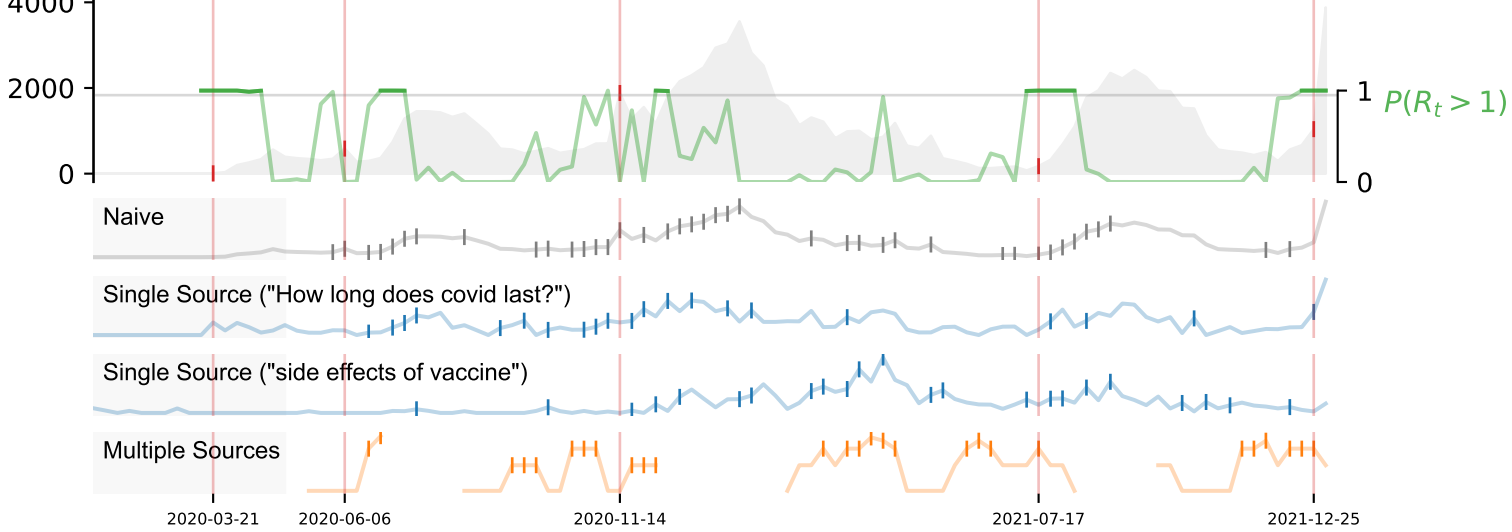

Weekly Confirmed Cases (GA, Fulton)

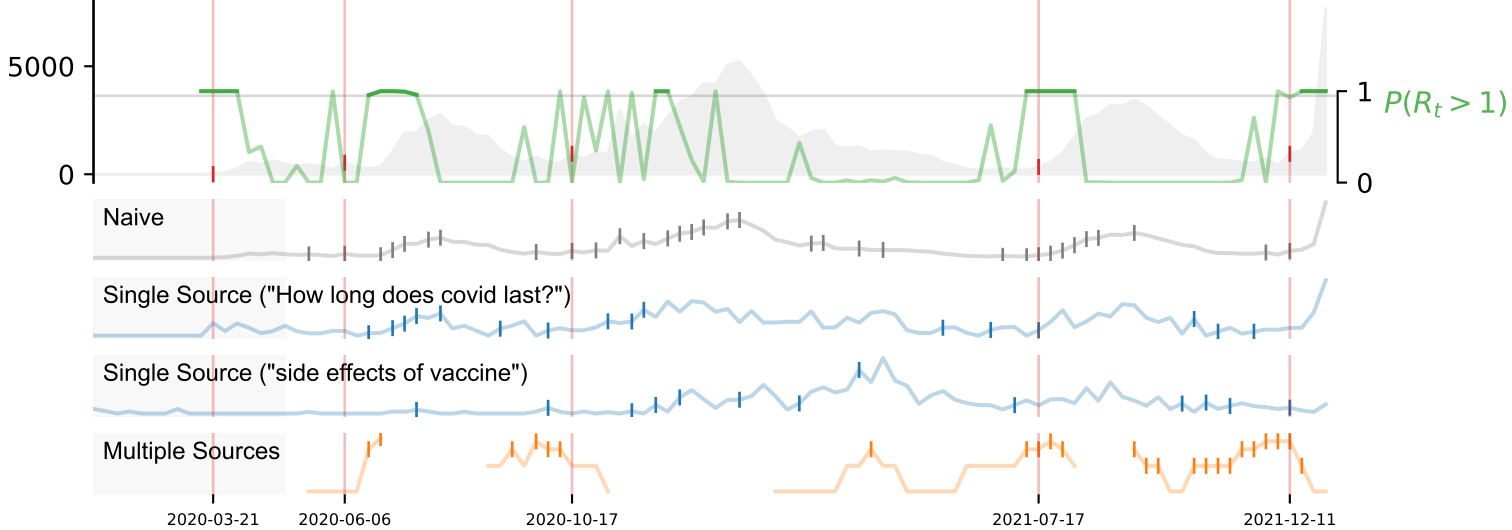



- Naive Method
- Single Source Method
- Multiple Sources Method
- $P(R_t > 1)$
- Gold Standard Event
- Signal Event
- Initial Training Period
- Gold Standard (JHU Cases)

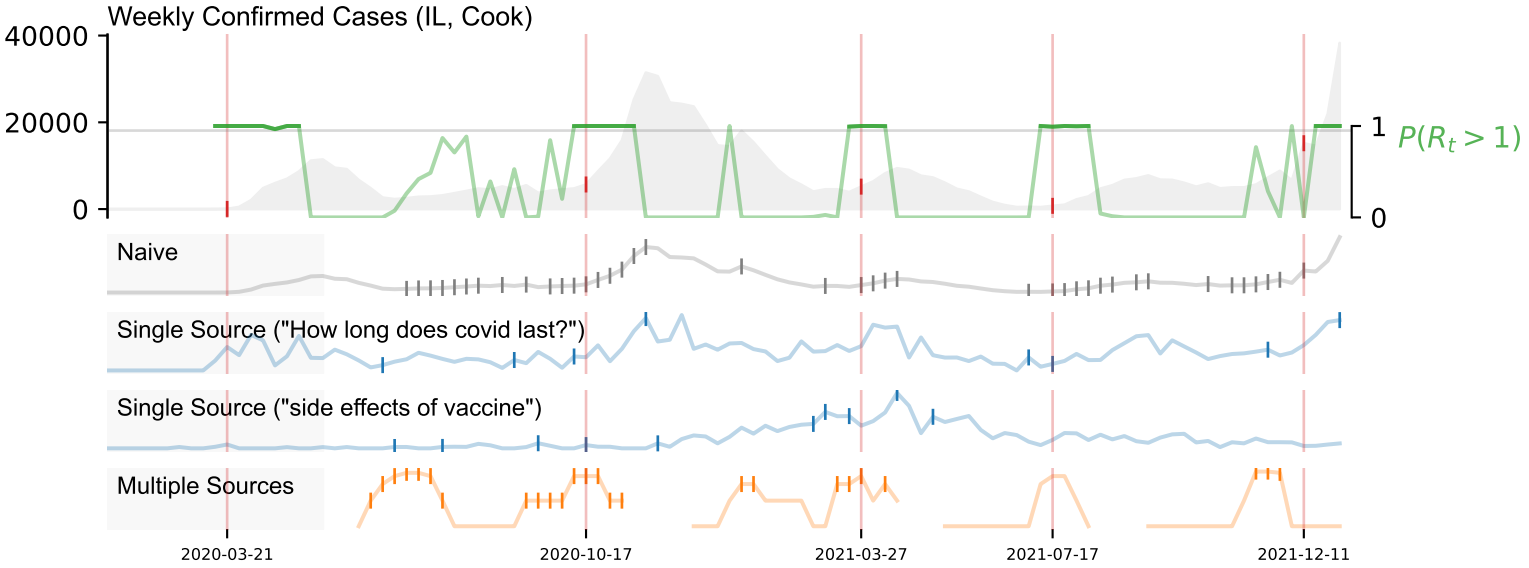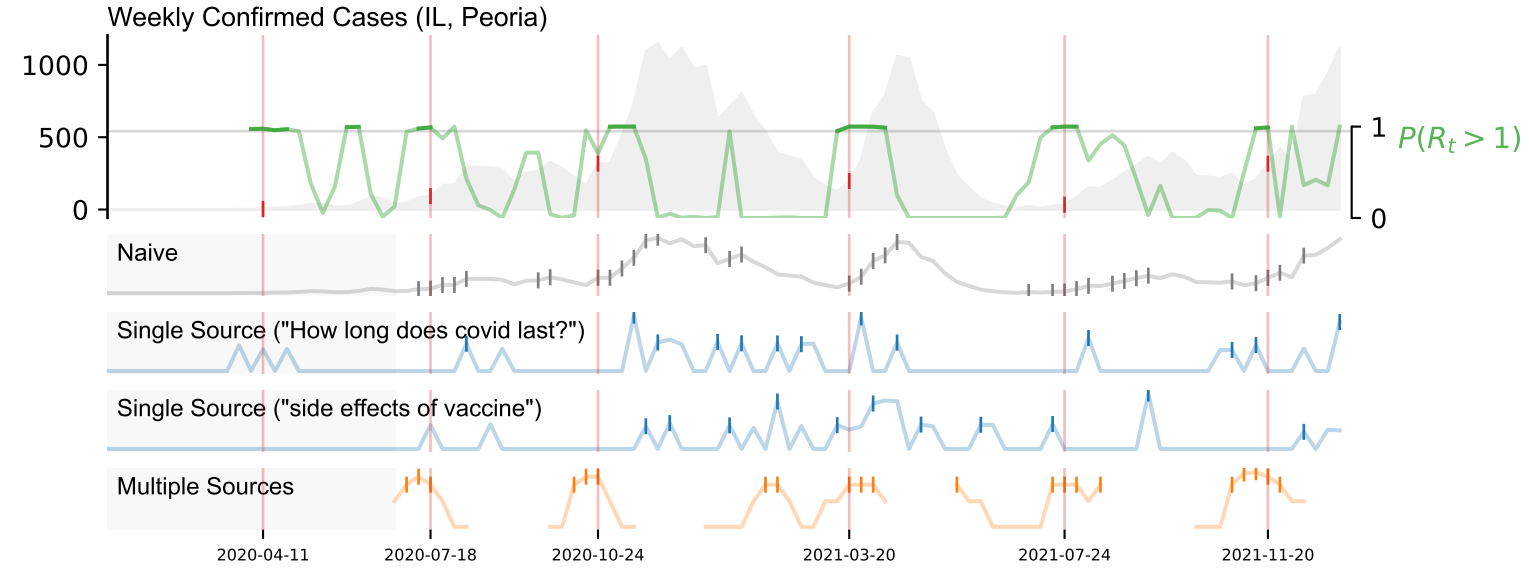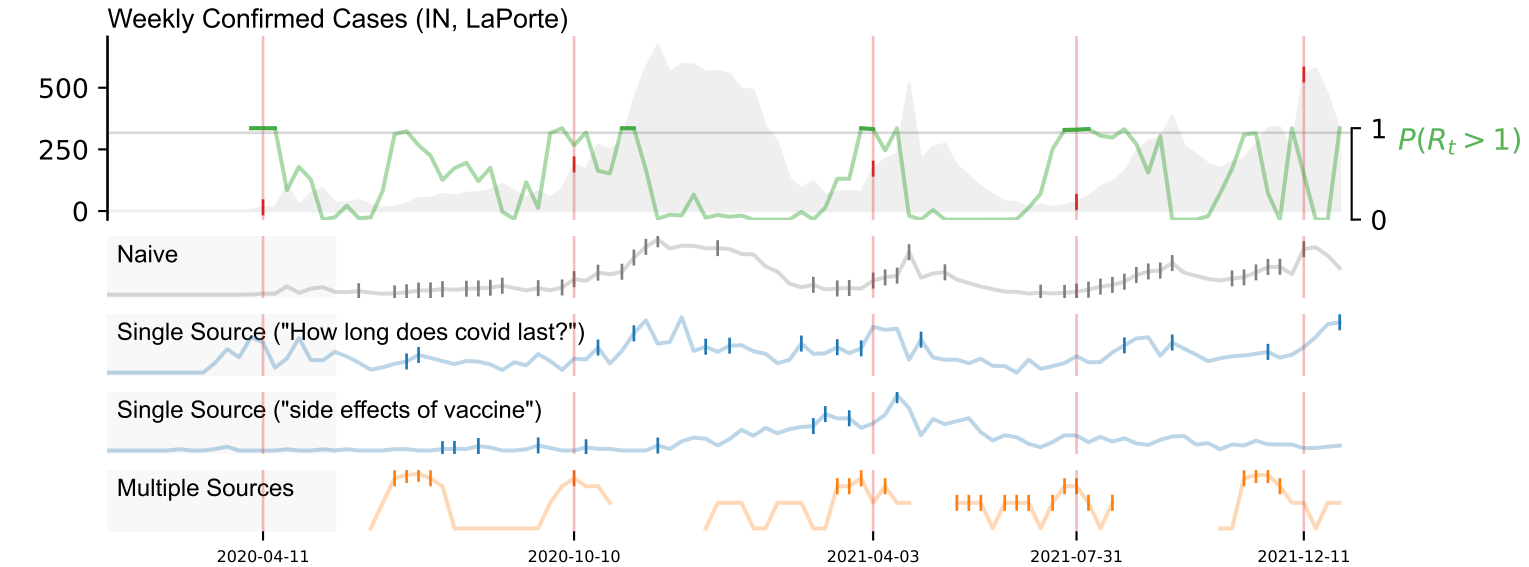

Weekly Confirmed Cases (IN, Lake)

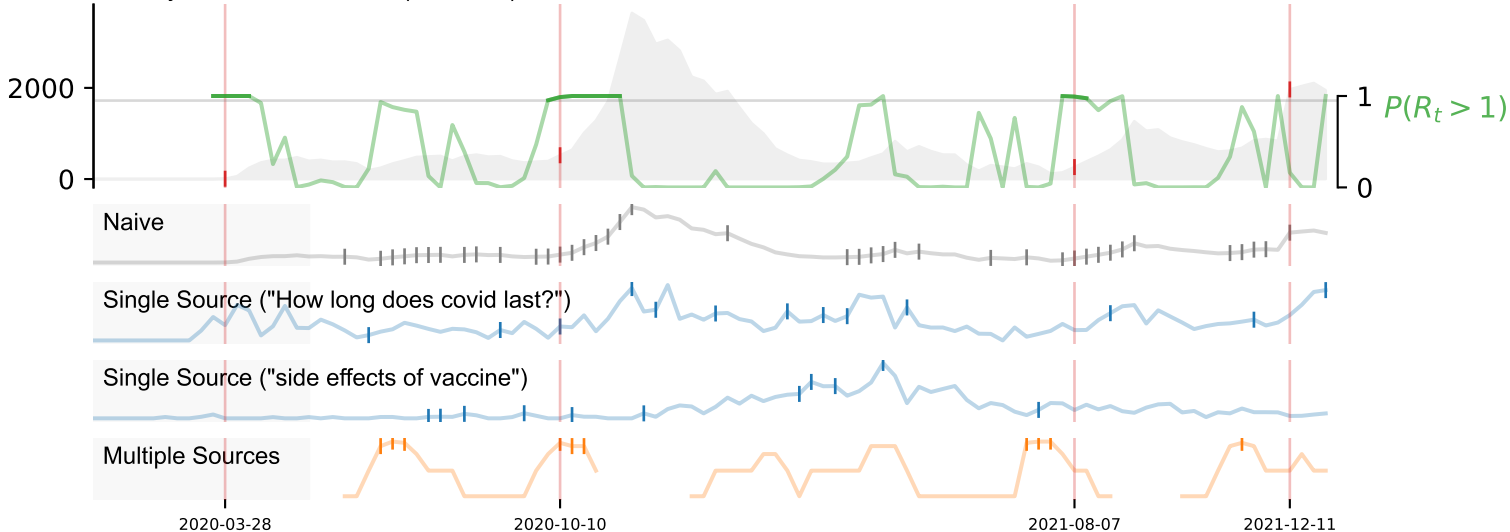

Weekly Confirmed Cases (IN, Porter)

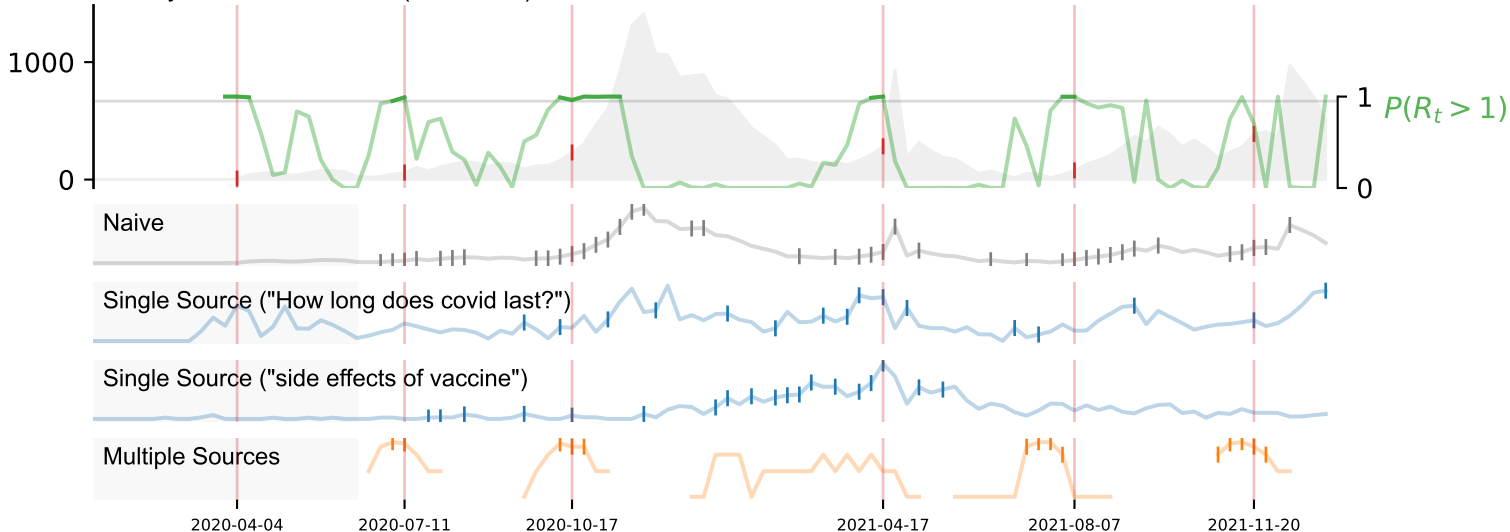

Weekly Confirmed Cases (KY, Clark)

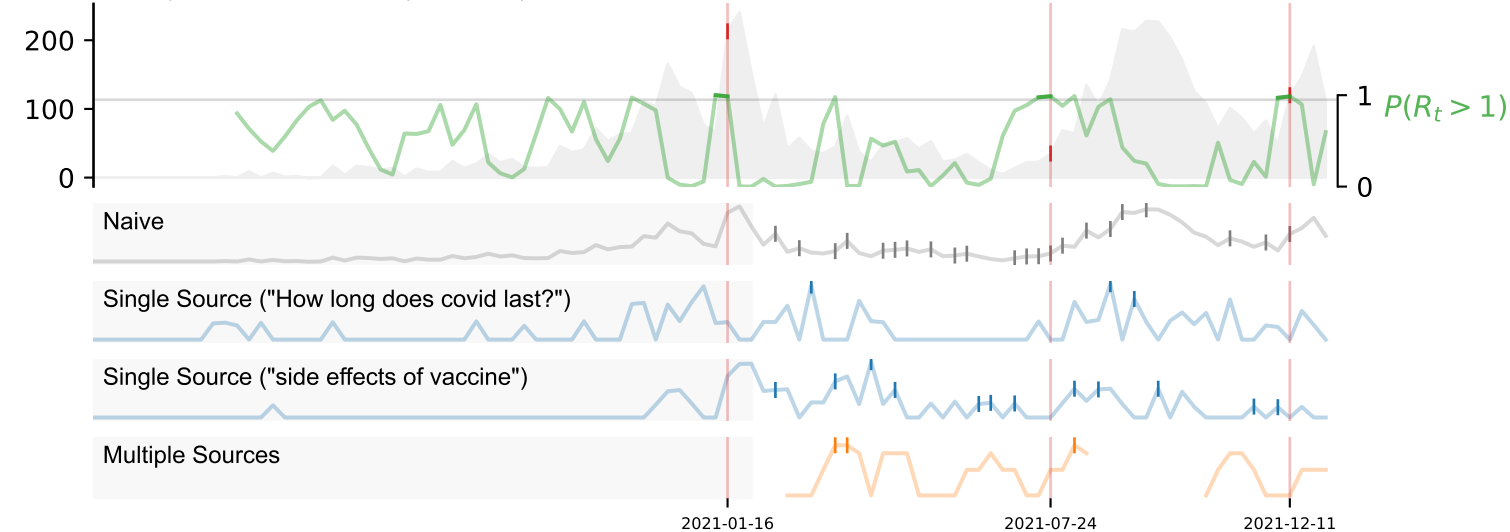

- Naive Method
- Single Source Method
- Multiple Sources Method
- $P(R_t > 1)$
- Gold Standard Event
- Signal Event
- Initial Training Period
- Gold Standard (JHU Cases)

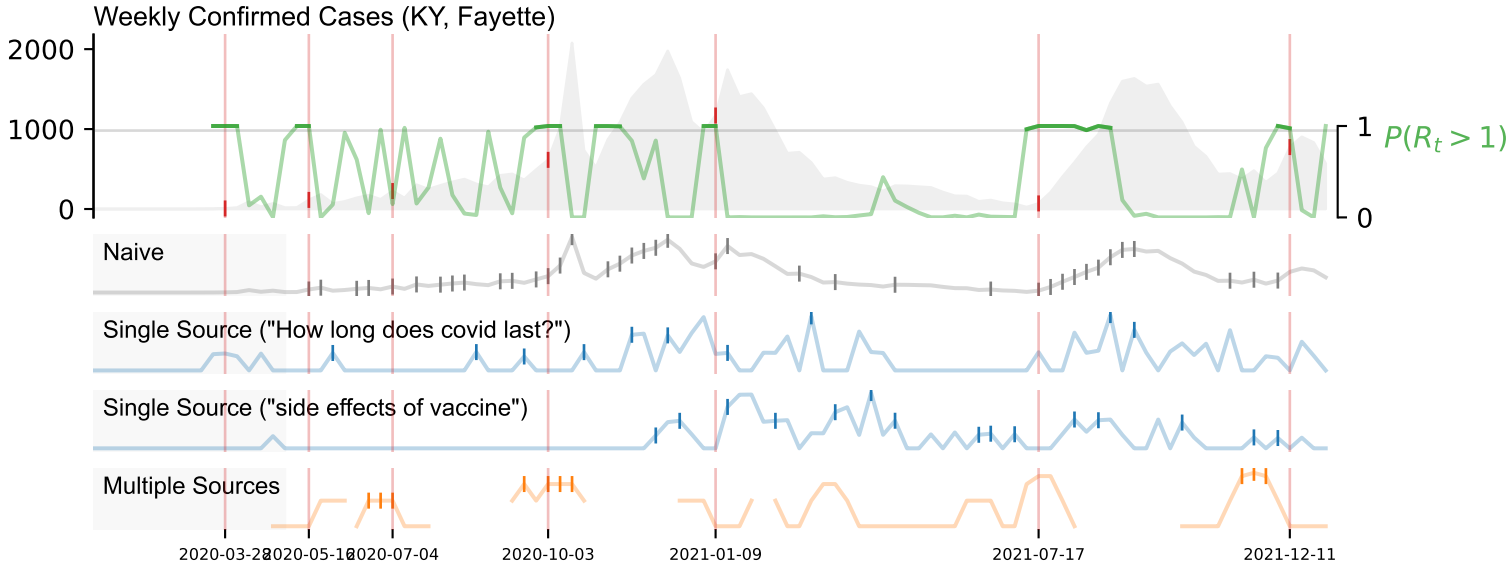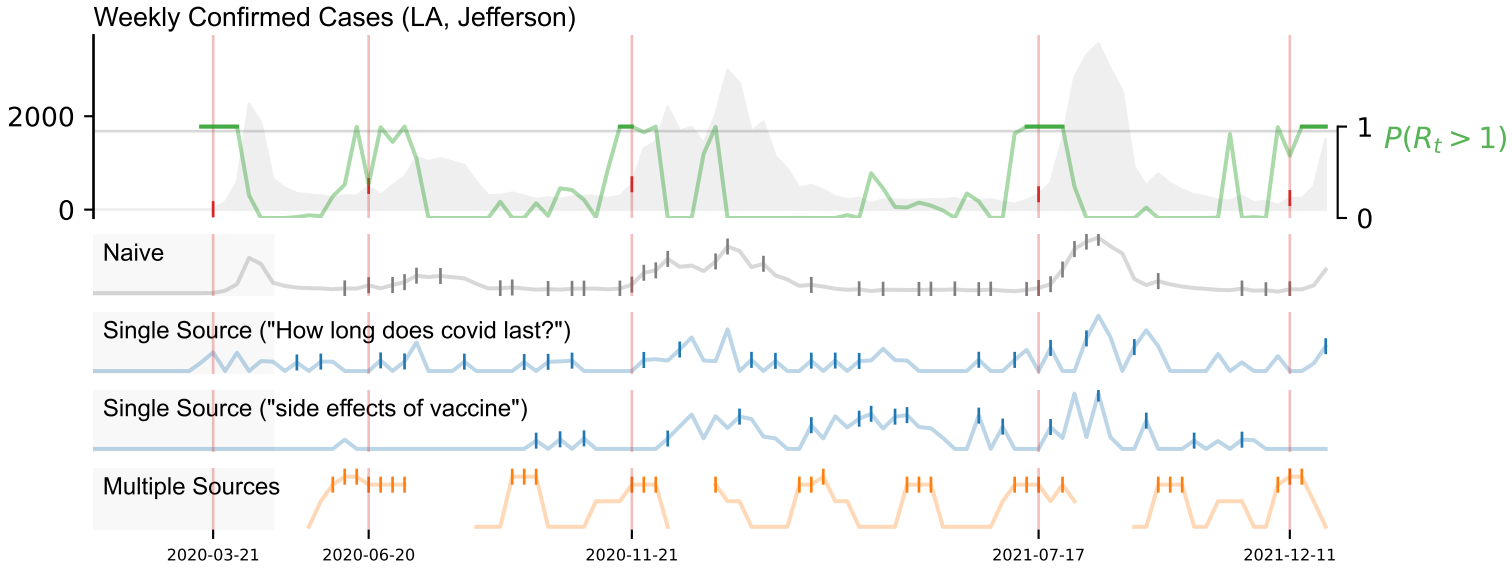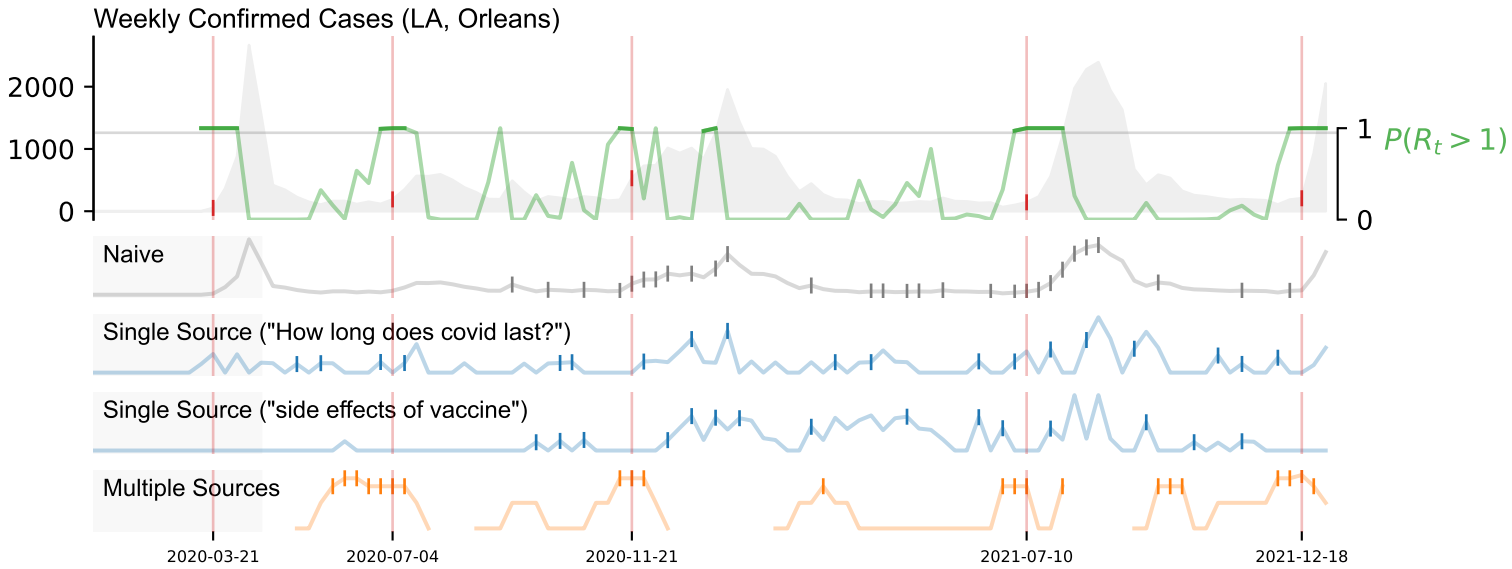

- Naive Method
- Single Source Method
- Multiple Sources Method
- $P(R_t > 1)$
- Gold Standard Event
- Signal Event
- Initial Training Period
- Gold Standard (JHU Cases)

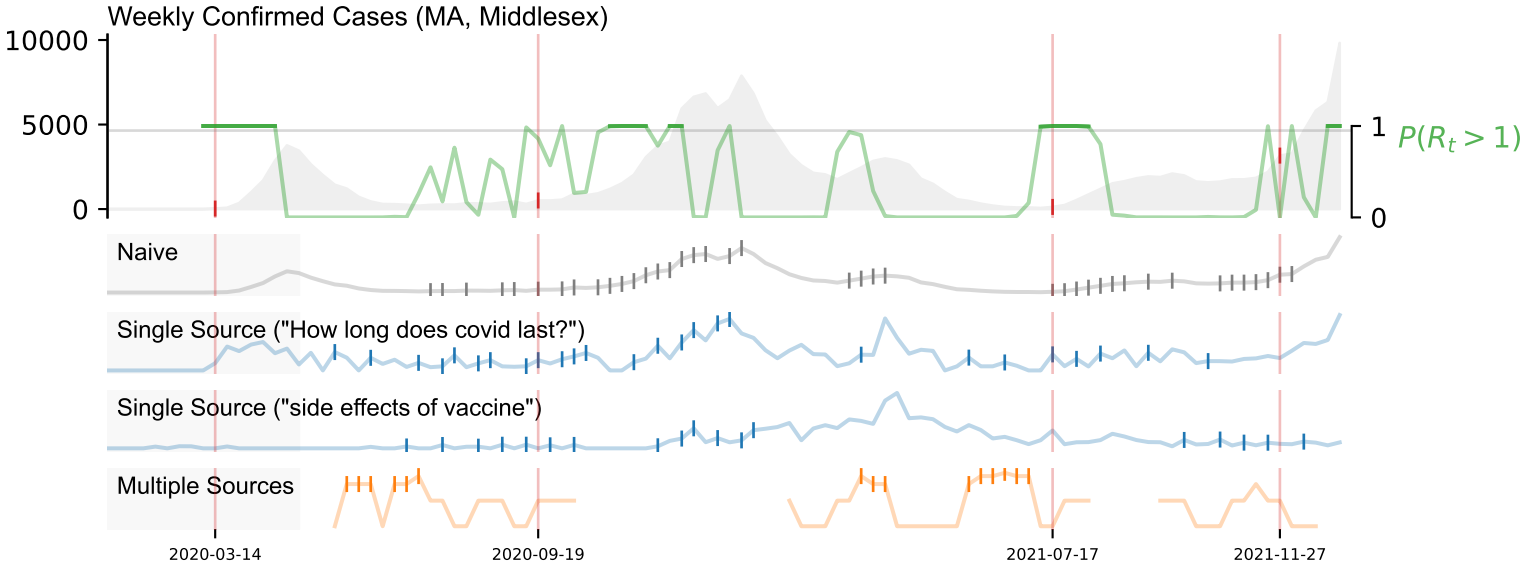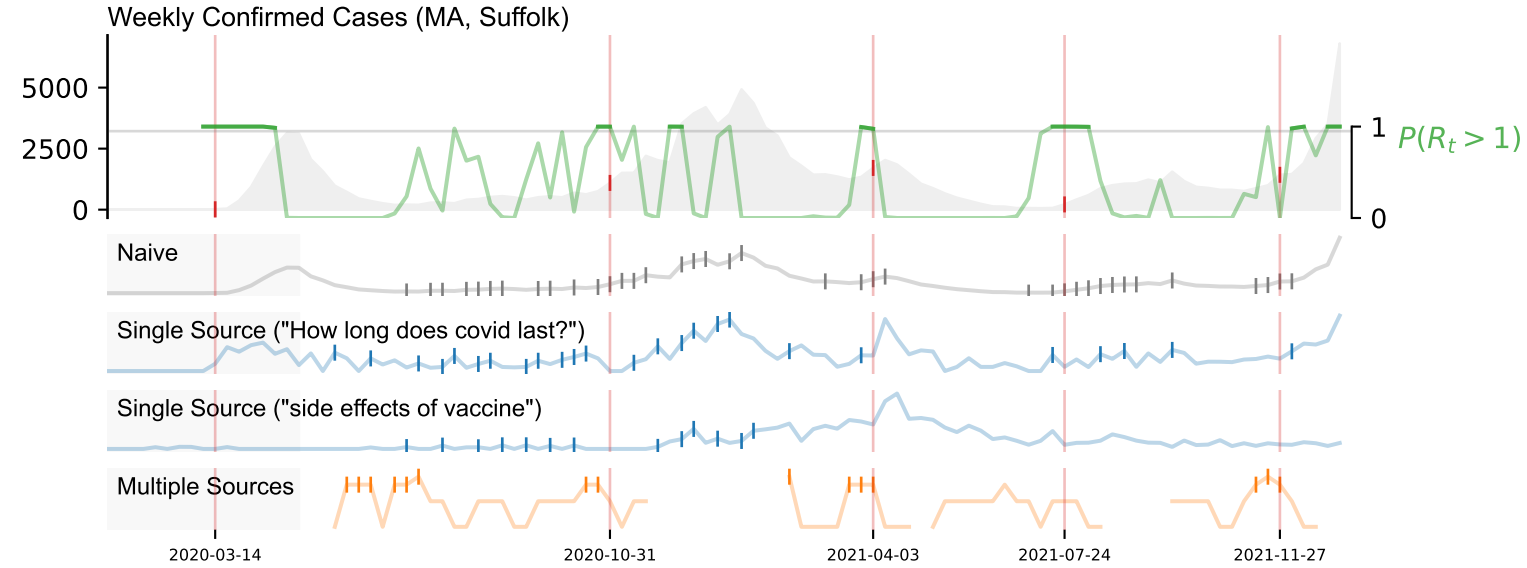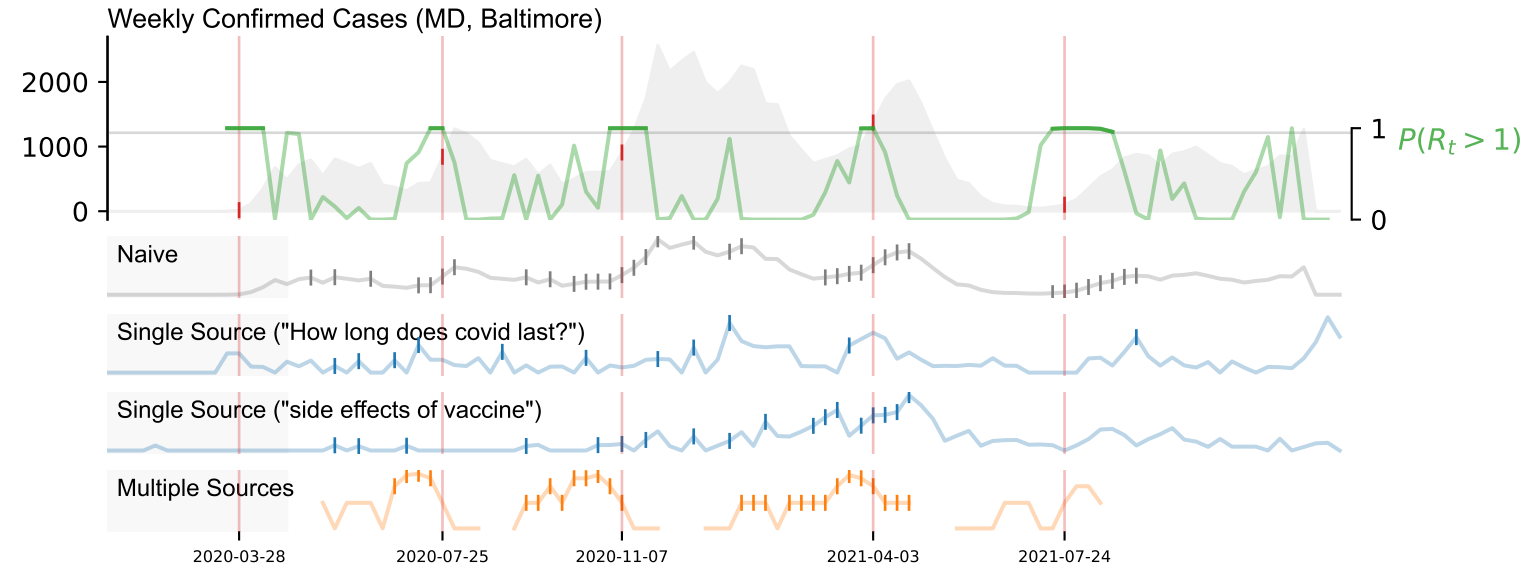

- Naive Method
- Single Source Method
- Multiple Sources Method
- $P(R_t > 1)$
- Gold Standard Event
- Signal Event
- Initial Training Period
- Gold Standard (JHU Cases)

Weekly Confirmed Cases (MD, Montgomery)

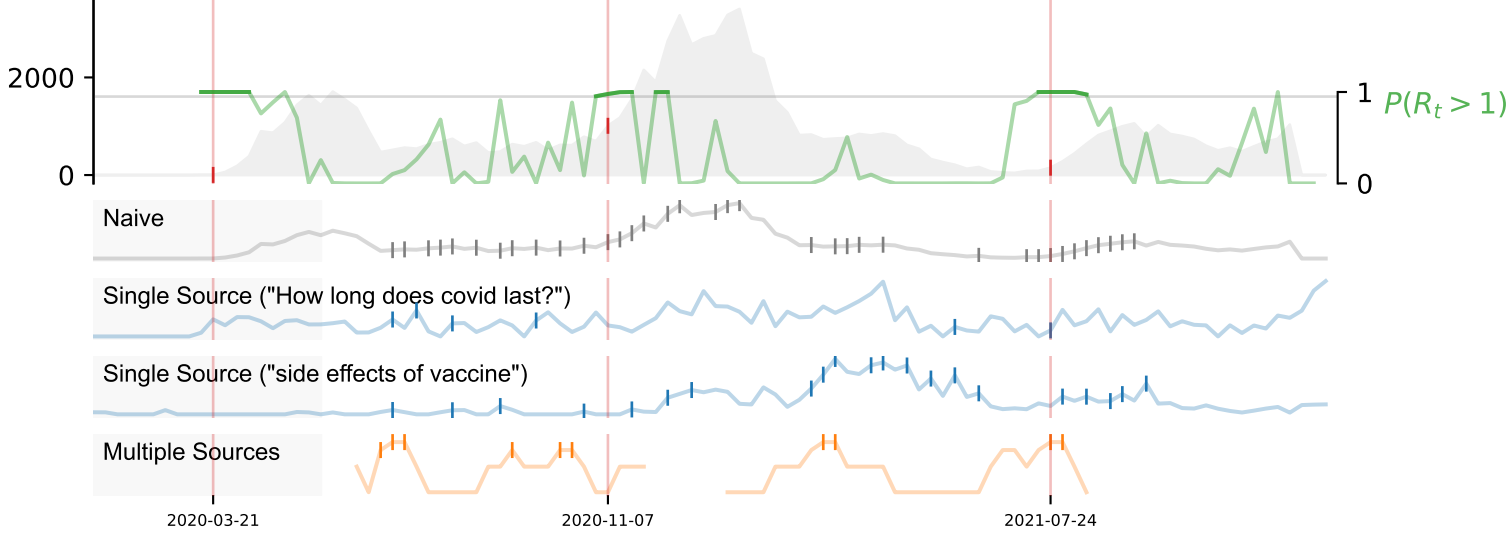

Weekly Confirmed Cases (MI, Kent)

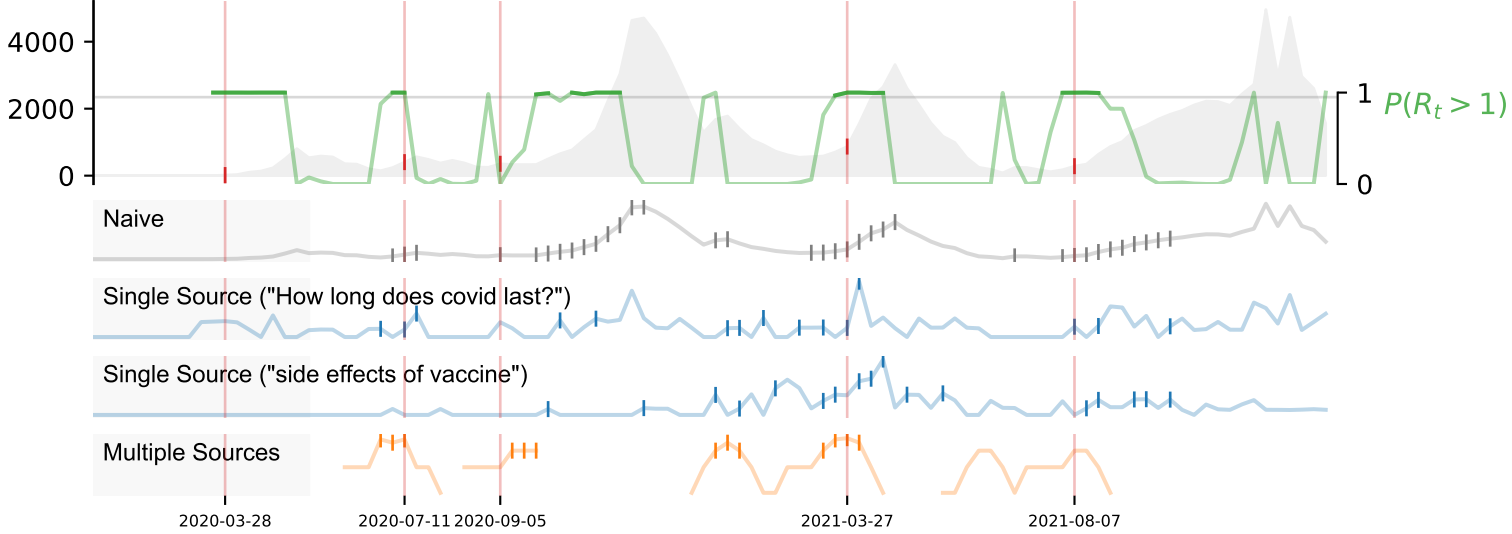

Weekly Confirmed Cases (MI, Oakland)

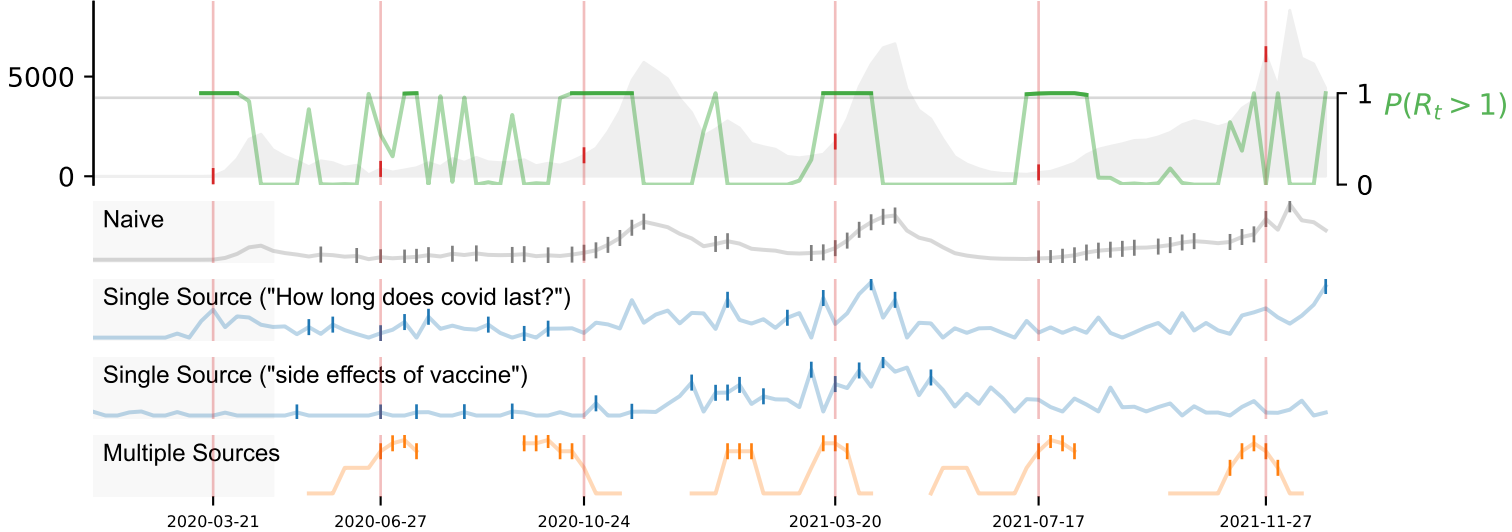

- Naive Method
- Single Source Method
- Multiple Sources Method
- $P(R_t > 1)$
- Gold Standard Event
- Signal Event
- Initial Training Period
- Gold Standard (JHU Cases)

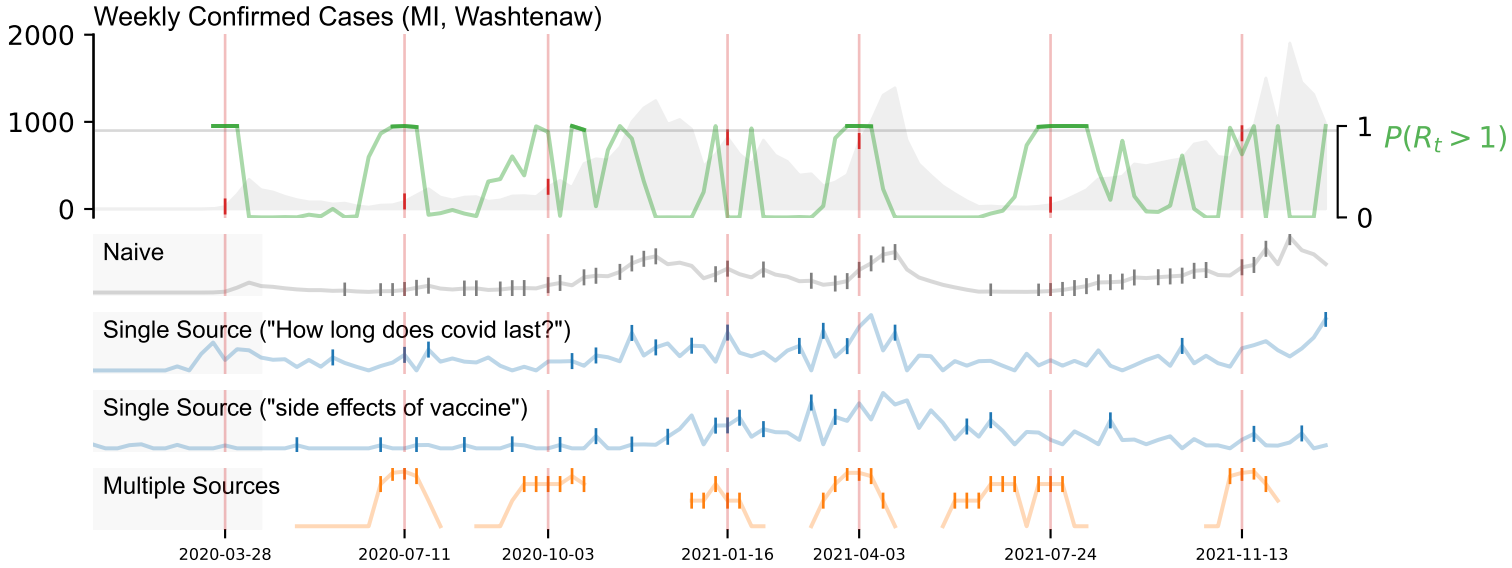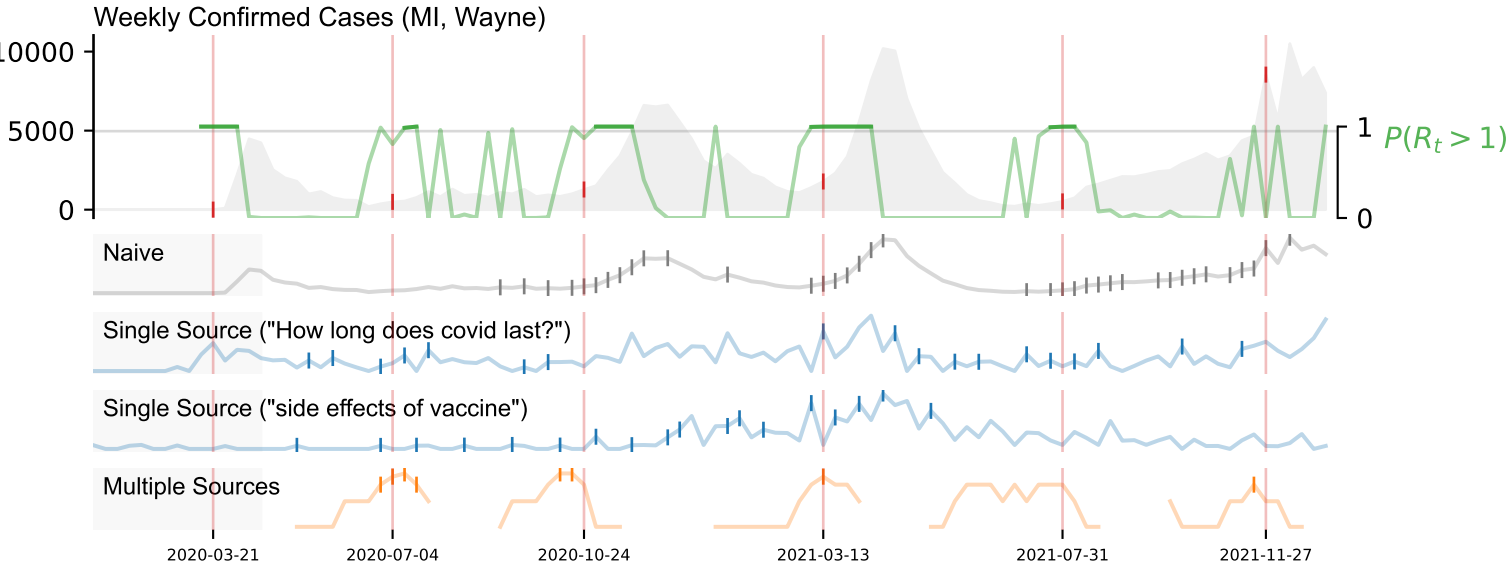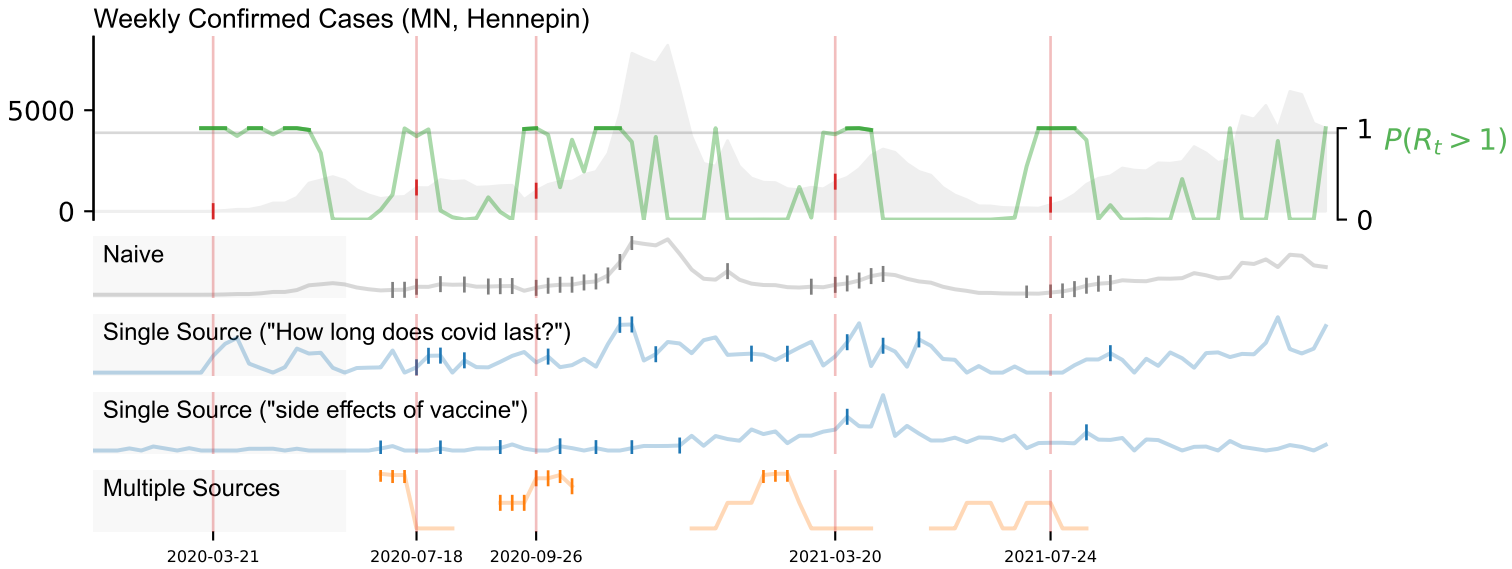

- Naive Method
- Single Source Method
- Multiple Sources Method
- $P(R_t > 1)$
- Gold Standard Event
- Signal Event
- Initial Training Period
- Gold Standard (JHU Cases)

Weekly Confirmed Cases (MO, Clay)

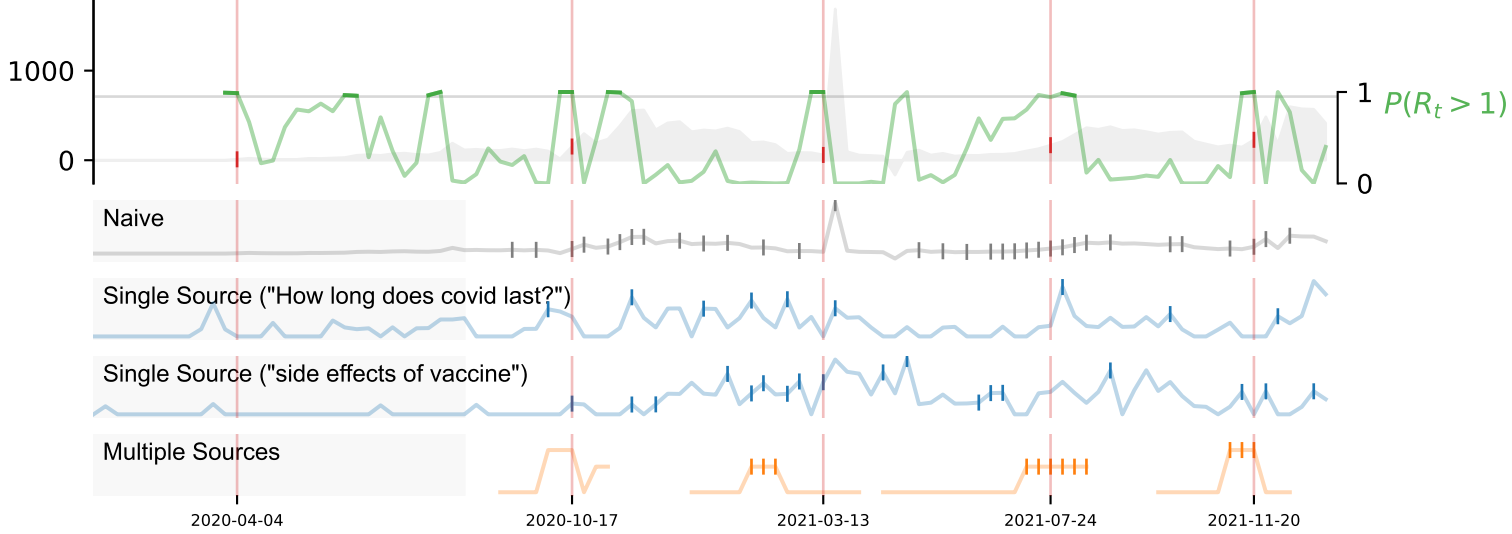

Weekly Confirmed Cases (MO, Jackson)

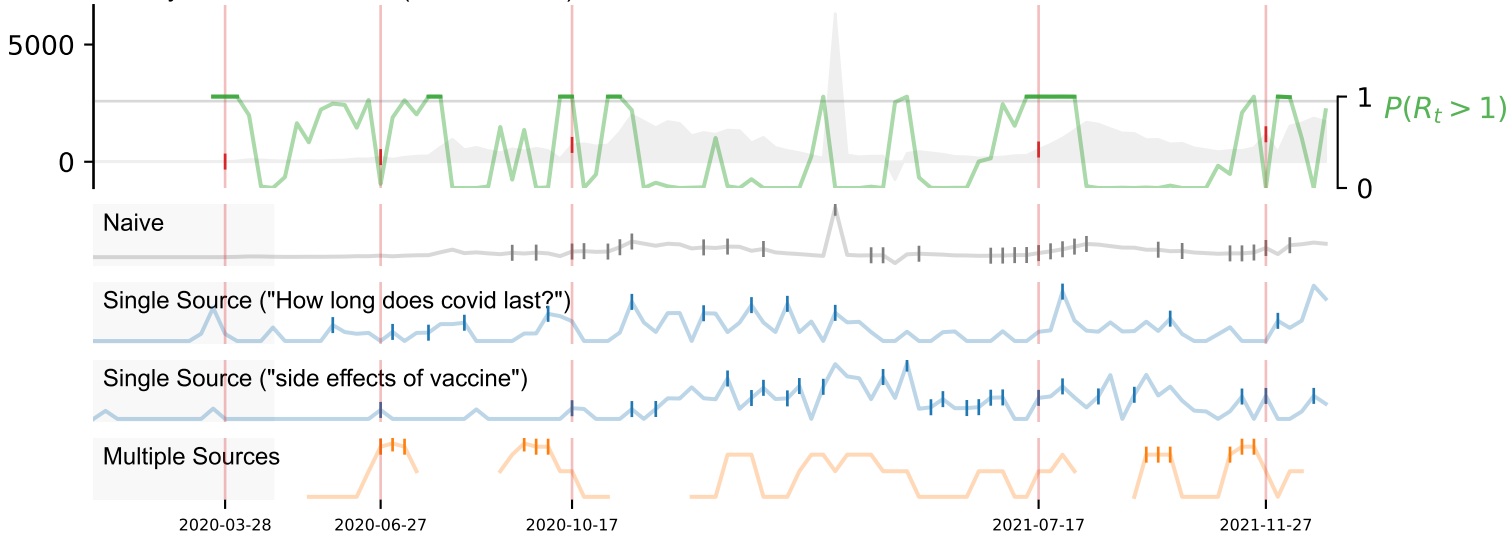

Weekly Confirmed Cases (MO, St. Louis)

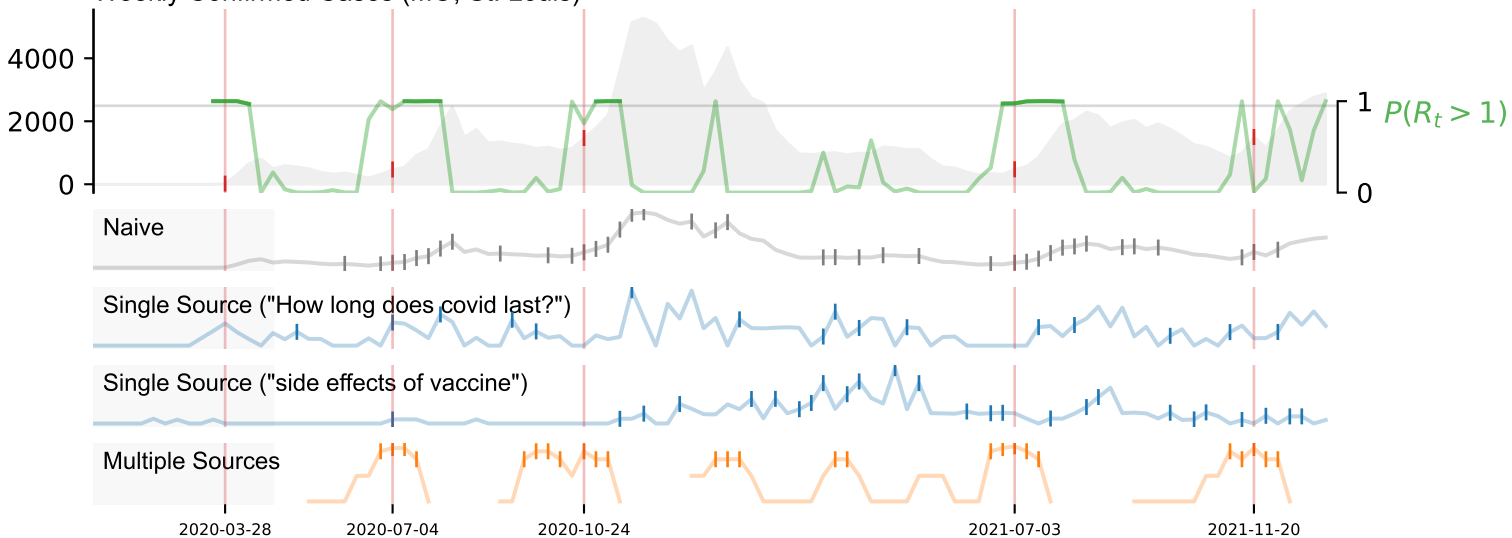

- Naive Method
- Single Source Method
- Multiple Sources Method
- $P(R_t > 1)$
- Gold Standard Event
- Signal Event
- Initial Training Period
- Gold Standard (JHU Cases)

Weekly Confirmed Cases (MS, Hinds)

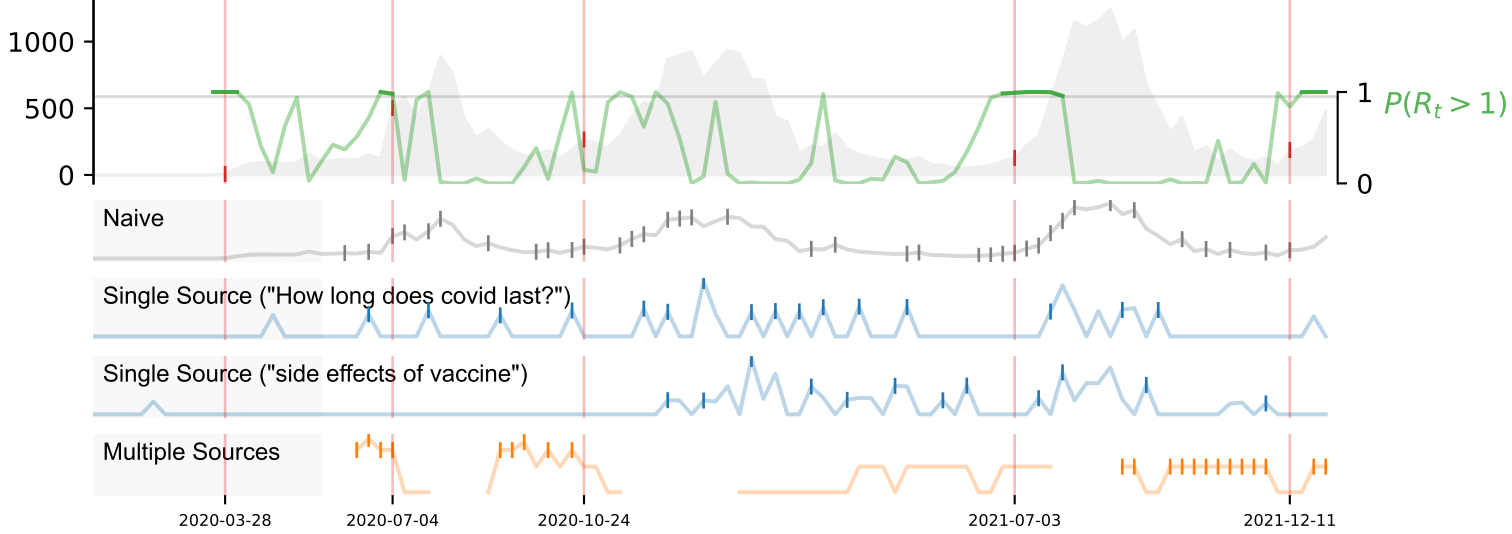

Weekly Confirmed Cases (NC, Cumberland)

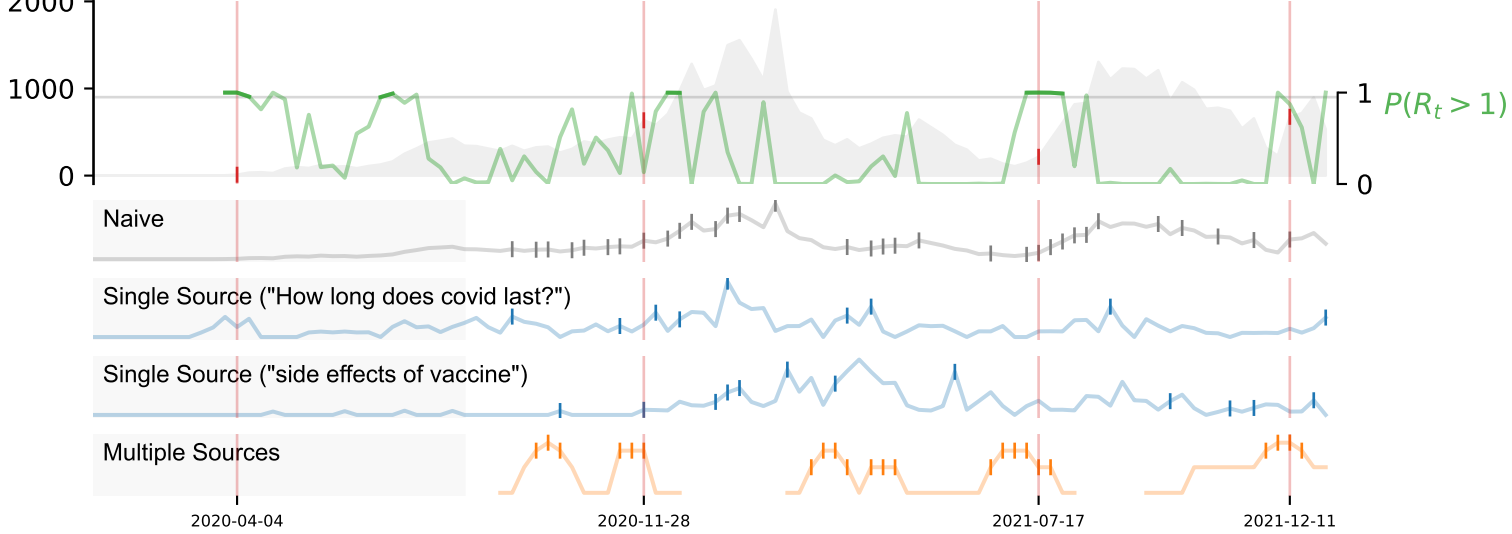

Weekly Confirmed Cases (NC, Forsyth)

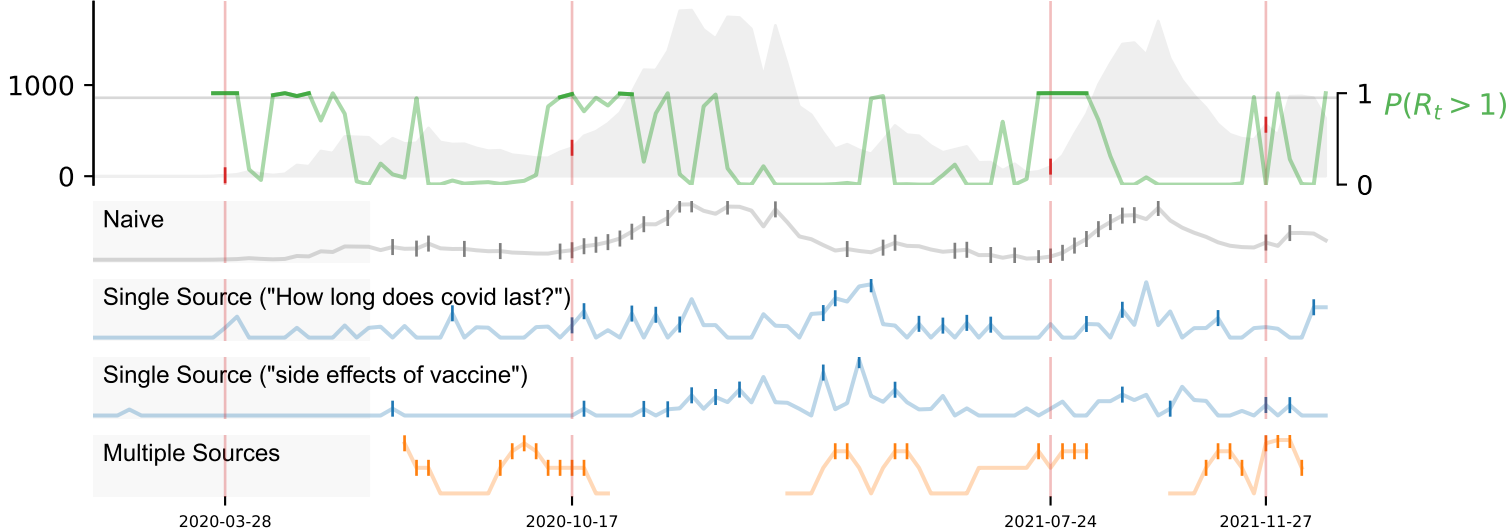



- Naive Method
- Single Source Method
- Multiple Sources Method
- $P(R_t > 1)$
- Gold Standard Event
- Signal Event
- Initial Training Period
- Gold Standard (JHU Cases)

Weekly Confirmed Cases (NC, Hoke)

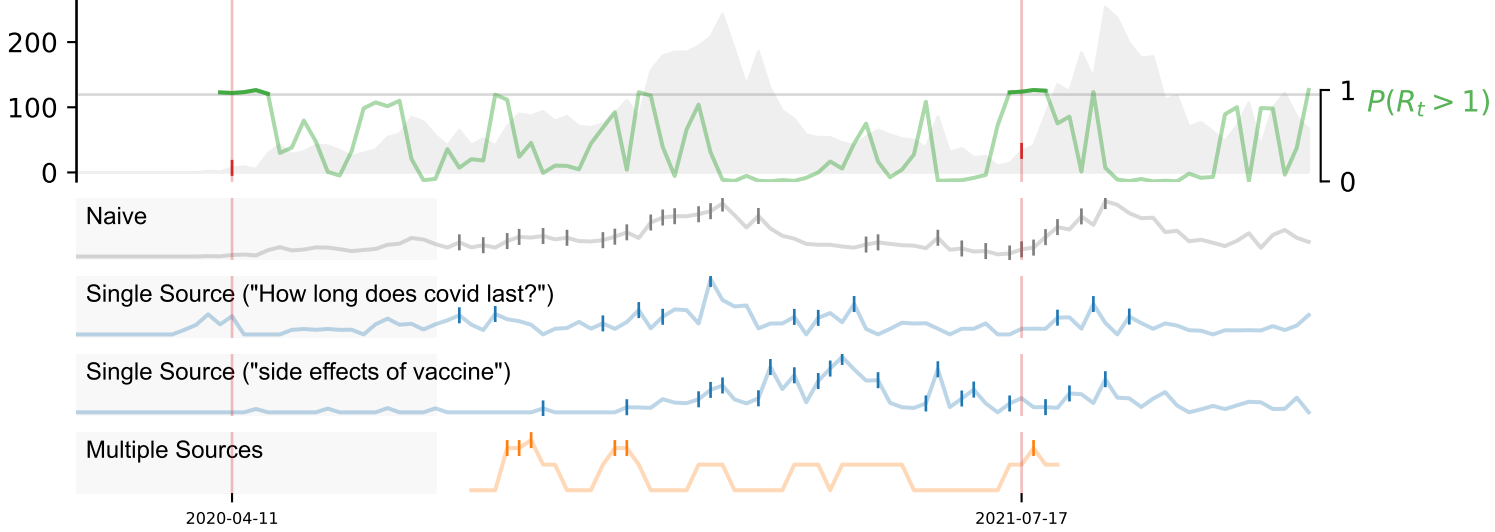

Weekly Confirmed Cases (NC, Johnston)

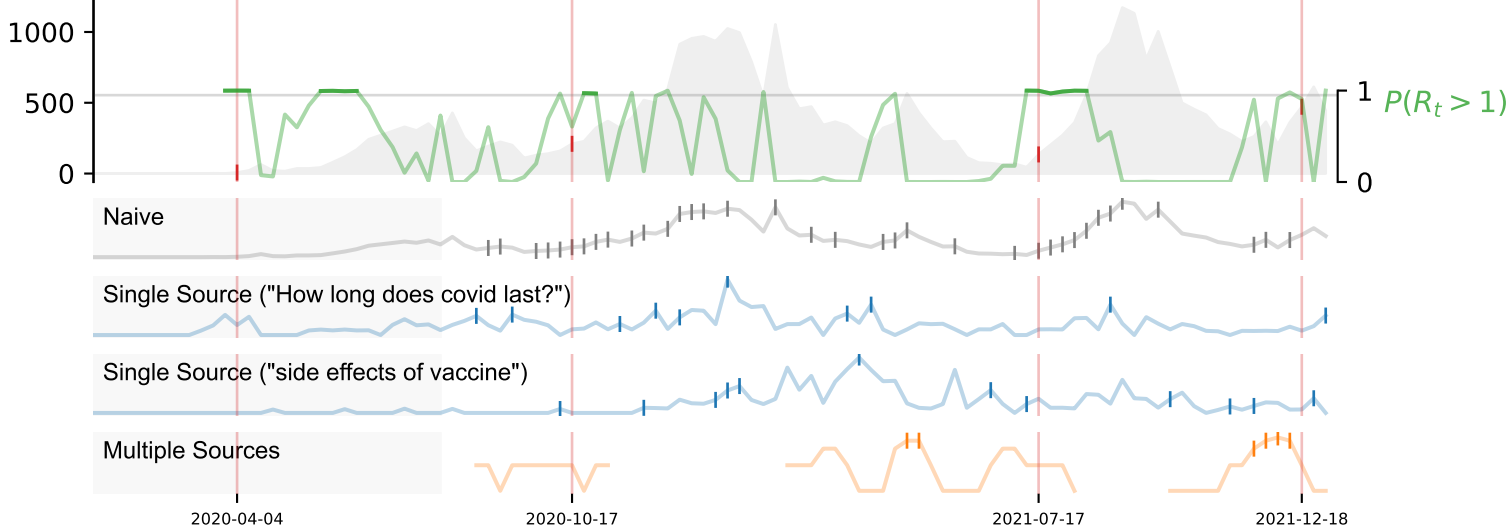

Weekly Confirmed Cases (NC, Mecklenburg)

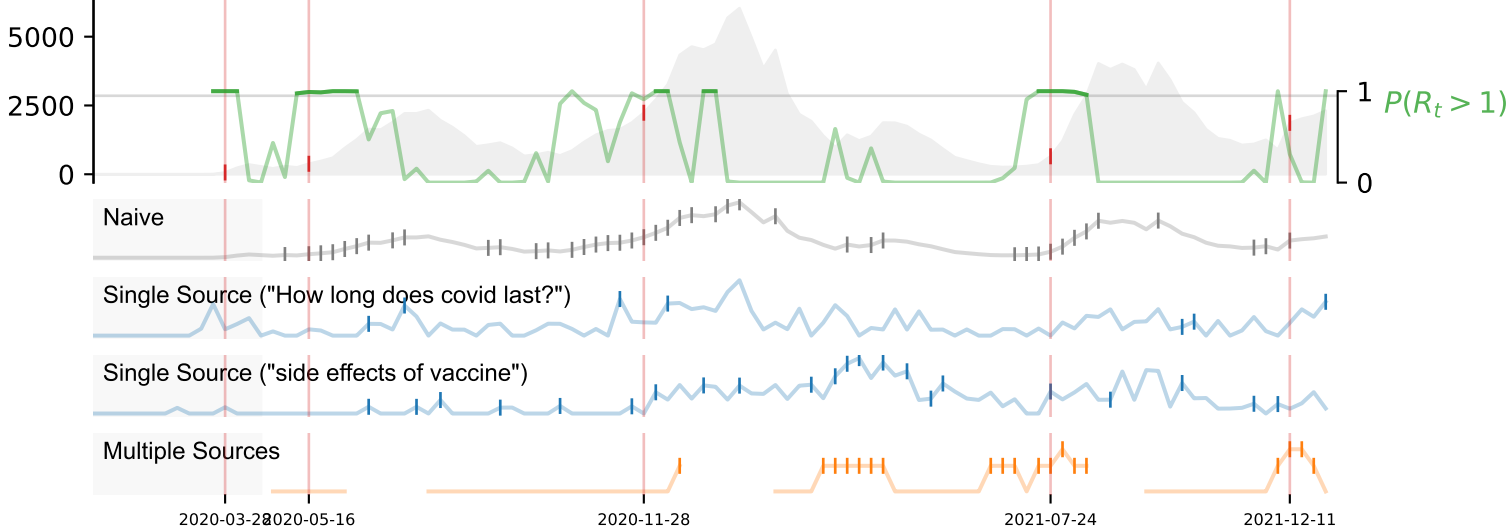

- Naive Method
- Single Source Method
- Multiple Sources Method
- $P(R_t > 1)$
- Gold Standard Event
- Signal Event
- Initial Training Period
- Gold Standard (JHU Cases)

Weekly Confirmed Cases (NC, Wake)

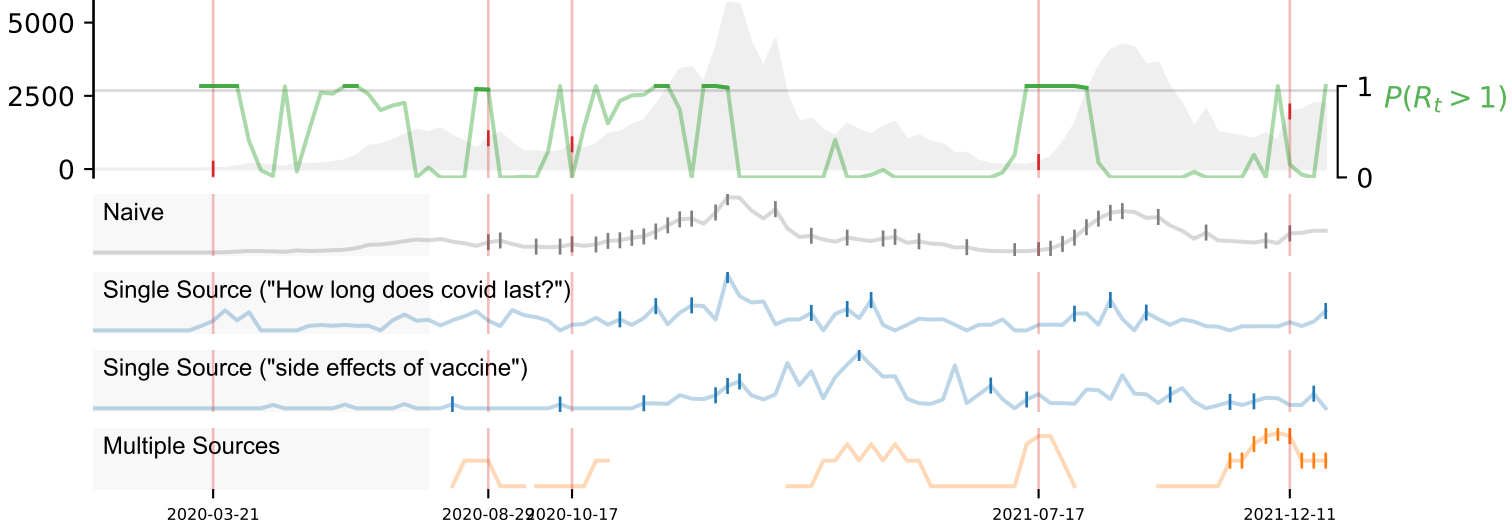

Weekly Confirmed Cases (NJ, Essex)

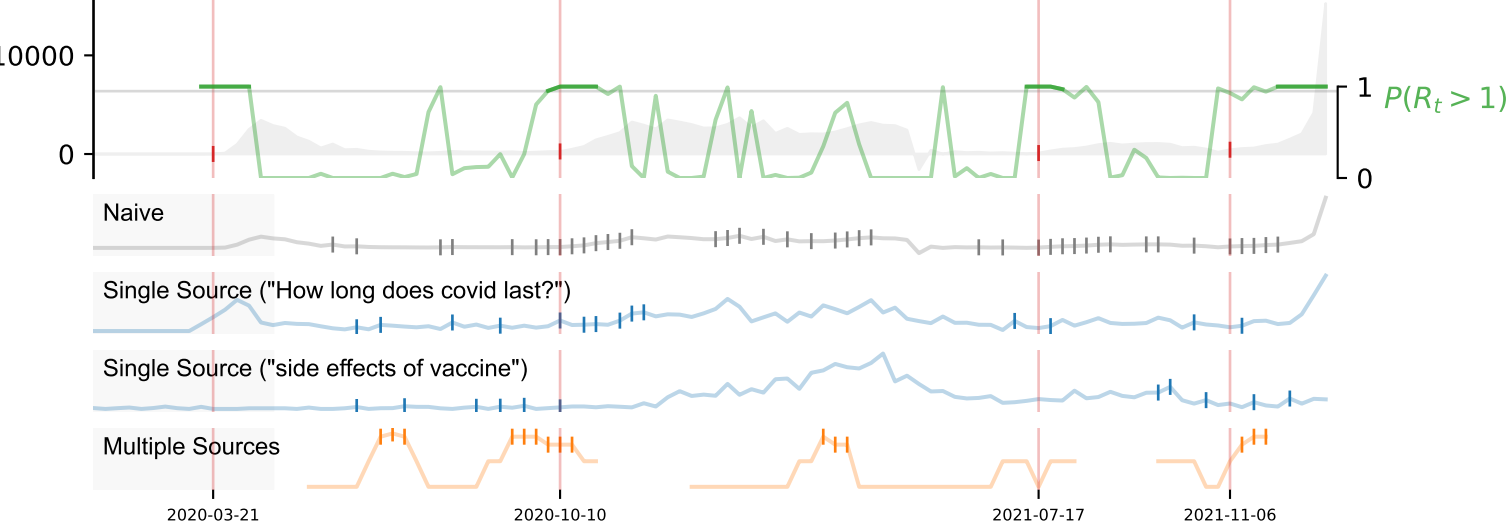

Weekly Confirmed Cases (NJ, Middlesex)

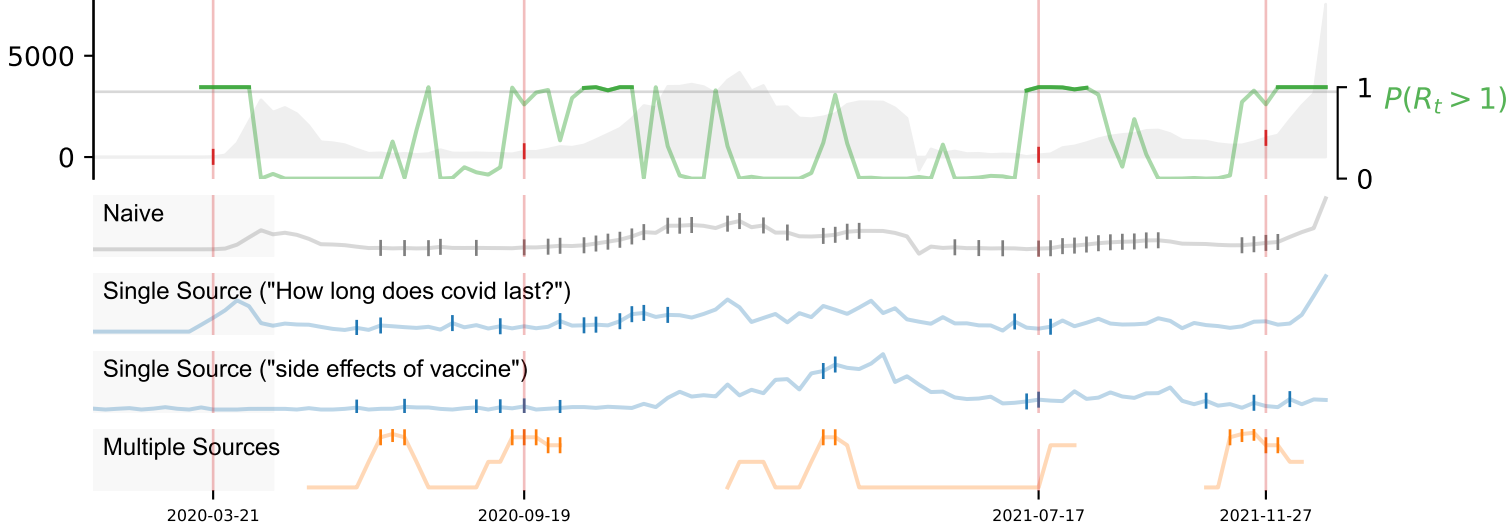

- Naive Method
- Single Source Method
- Multiple Sources Method
- $P(R_t > 1)$
- Gold Standard Event
- Signal Event
- Initial Training Period
- Gold Standard (JHU Cases)

Weekly Confirmed Cases (NM, Bernalillo)

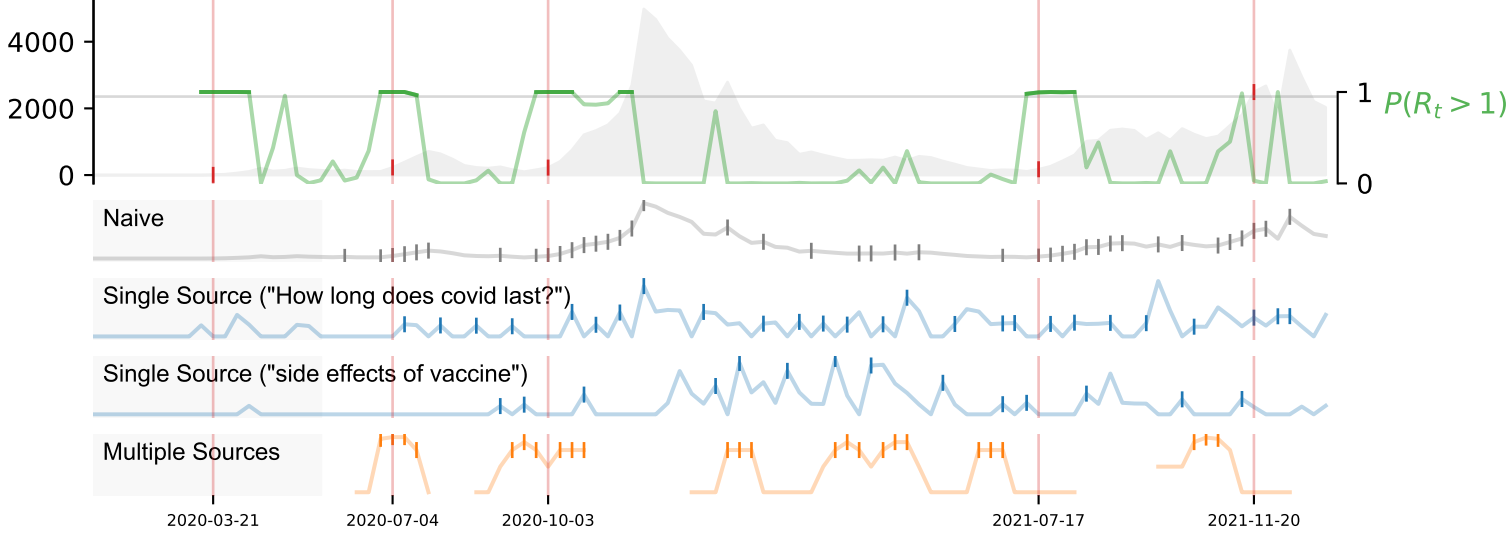

Weekly Confirmed Cases (NV, Clark)

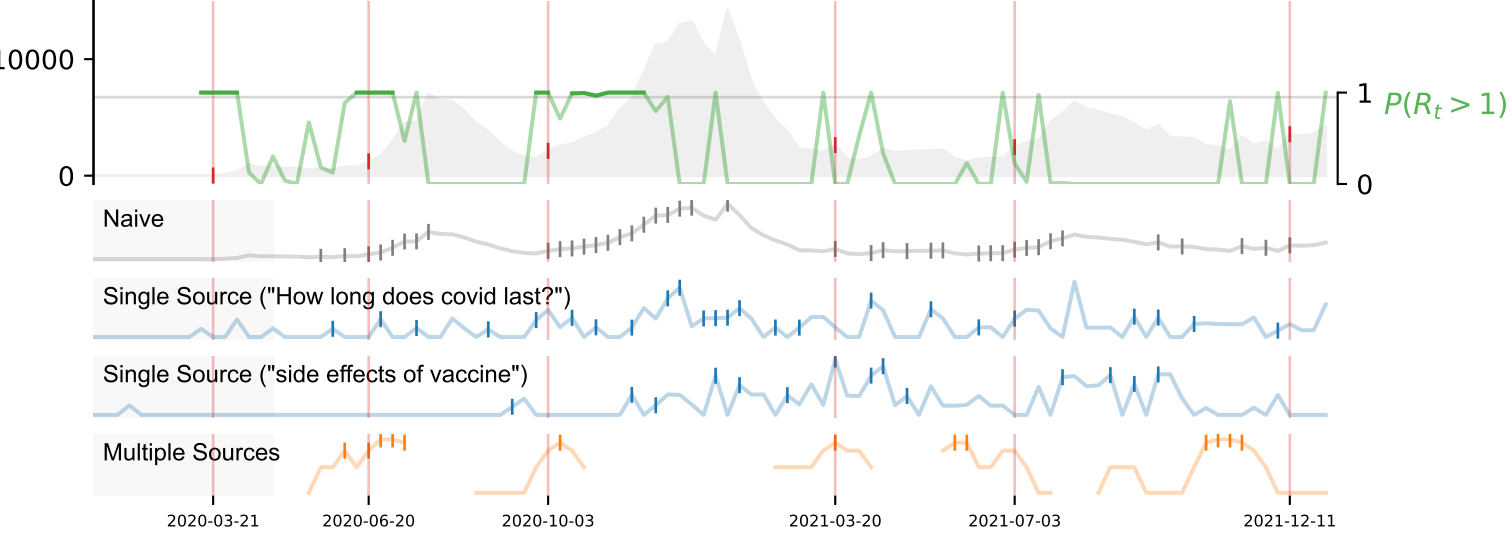

Weekly Confirmed Cases (NV, Washoe)

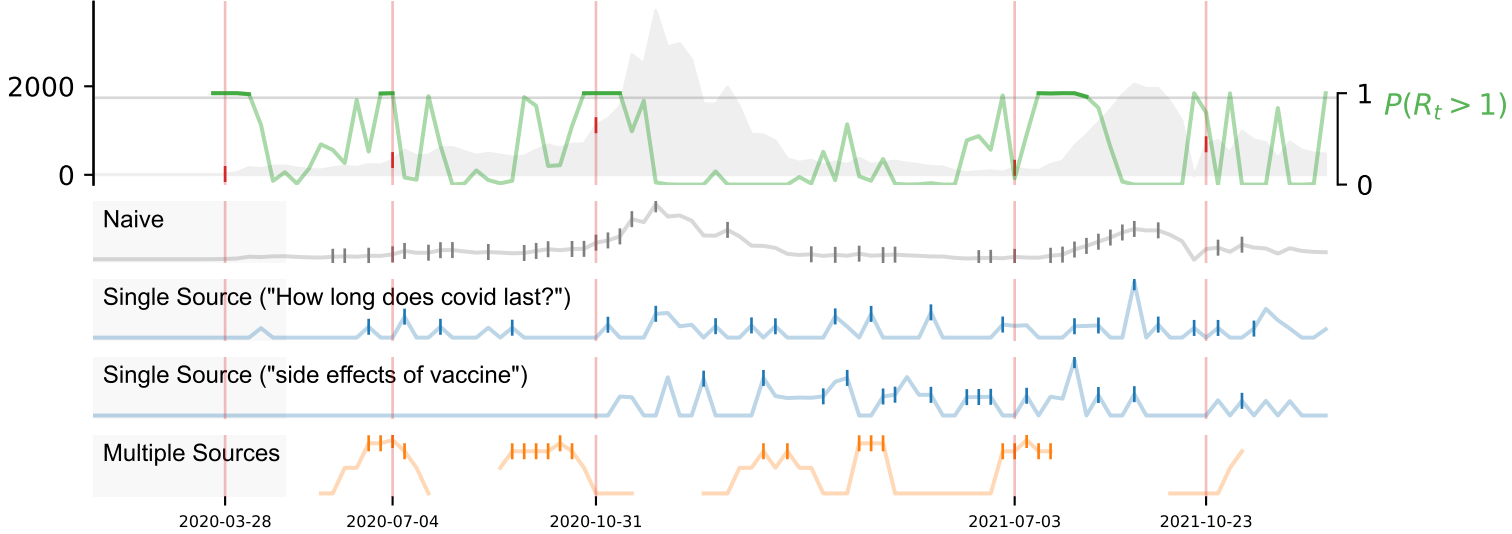

- Naive Method
- Single Source Method
- Multiple Sources Method
- $P(R_t > 1)$
- Gold Standard Event
- Signal Event
- Initial Training Period
- Gold Standard (JHU Cases)

Weekly Confirmed Cases (NY, Bronx)

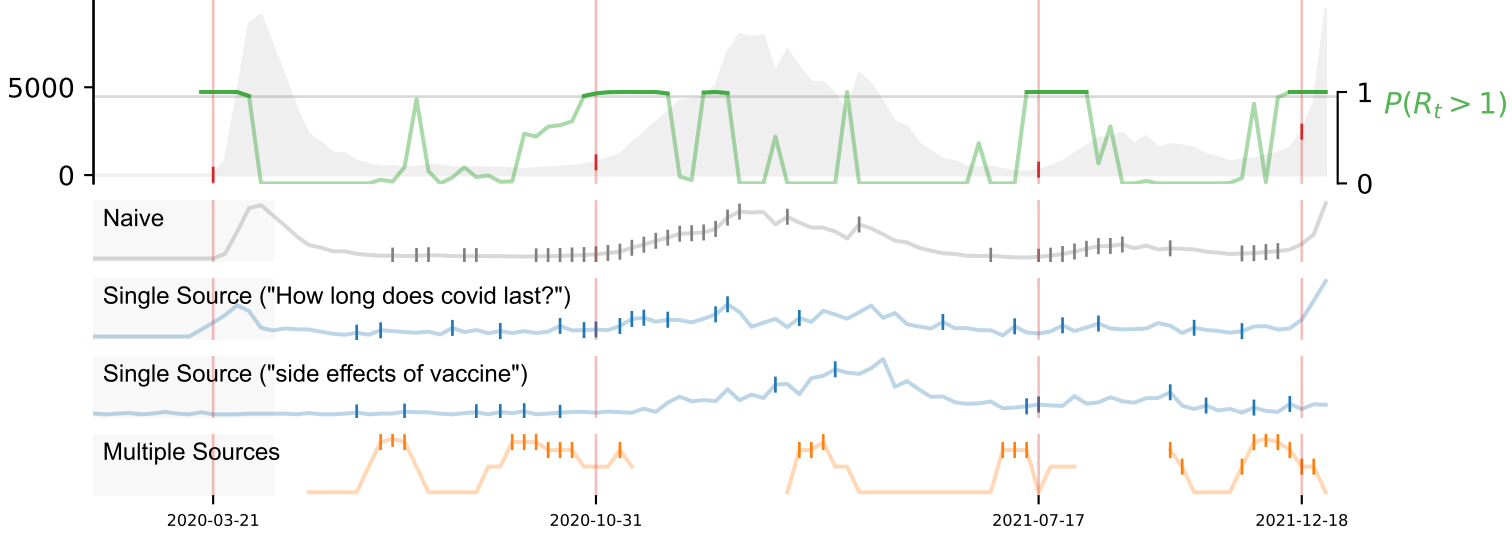

Weekly Confirmed Cases (NY, Kings)

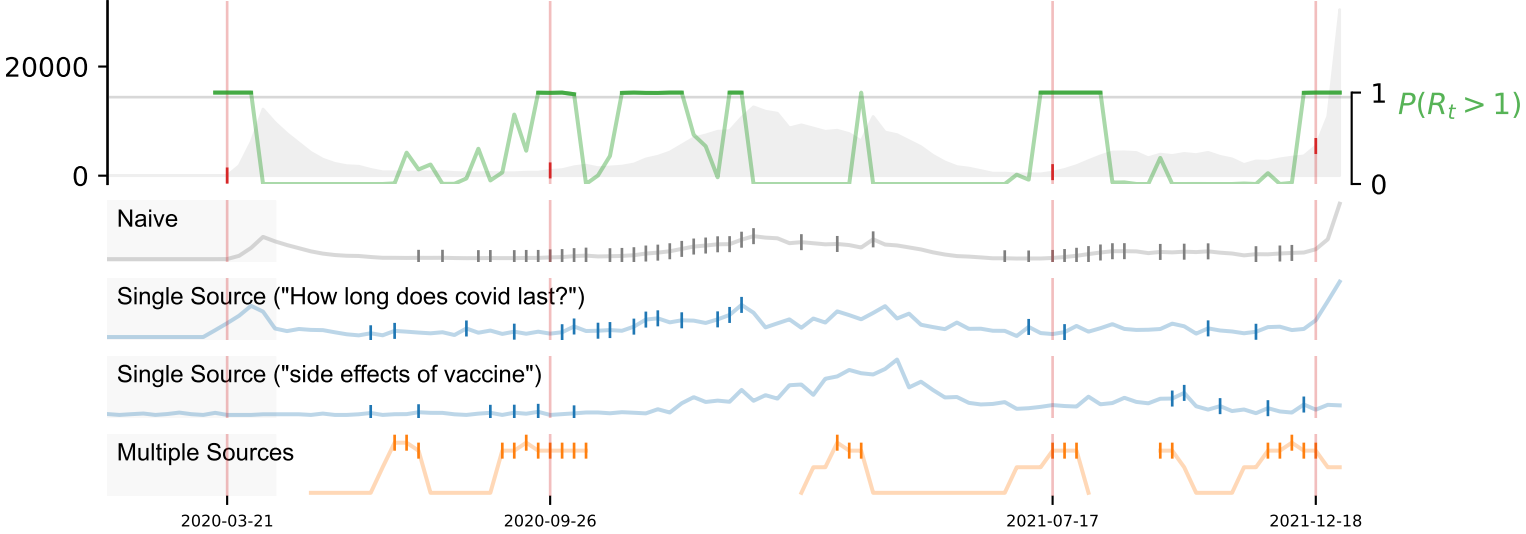

Weekly Confirmed Cases (NY, Monroe)

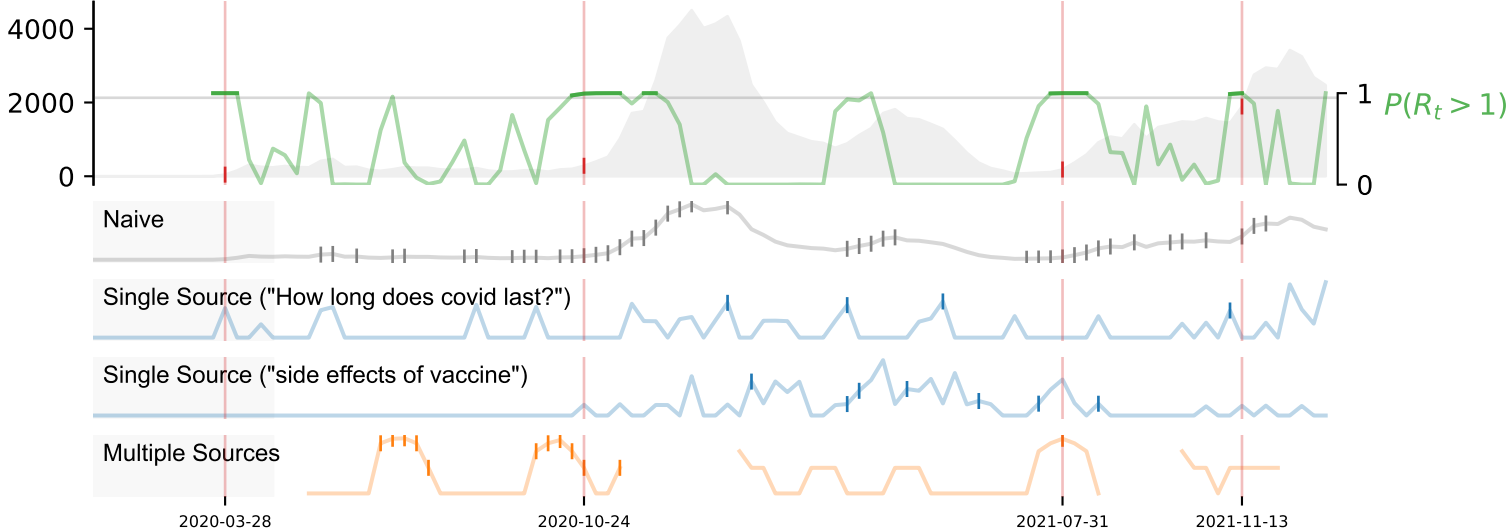

- Naive Method
- Single Source Method
- Multiple Sources Method
- $P(R_t > 1)$
- Gold Standard Event
- Signal Event
- Initial Training Period
- Gold Standard (JHU Cases)

Weekly Confirmed Cases (NY, Nassau)

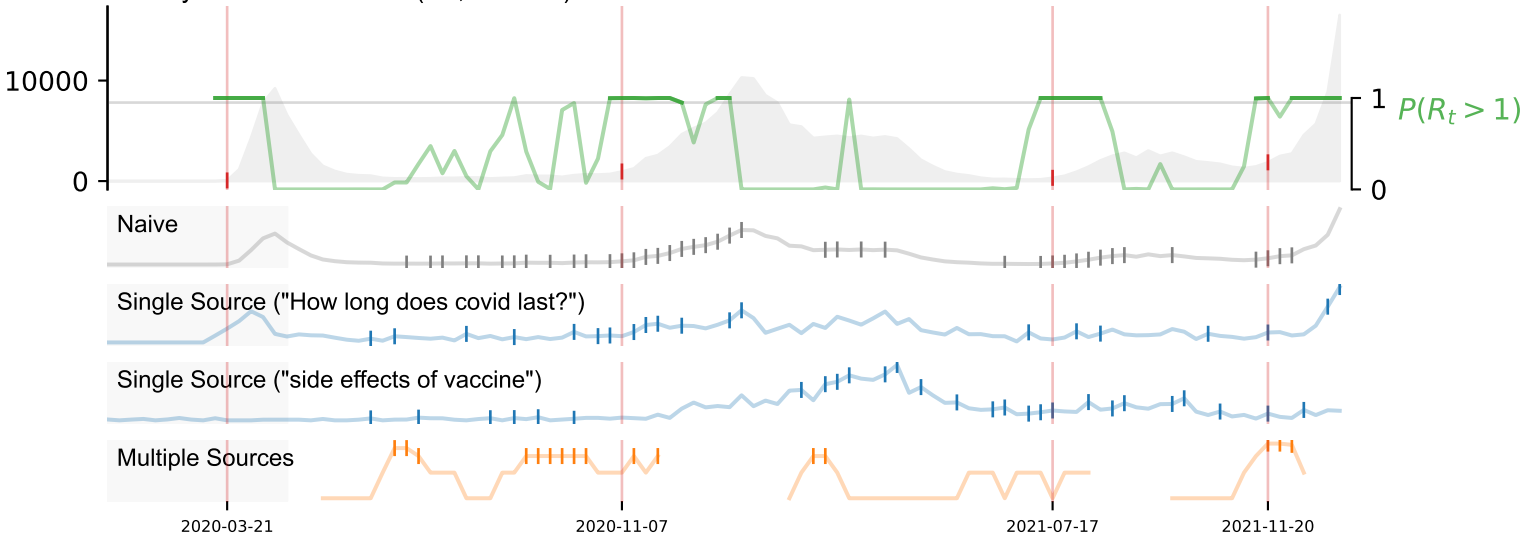

Weekly Confirmed Cases (NY, New York)

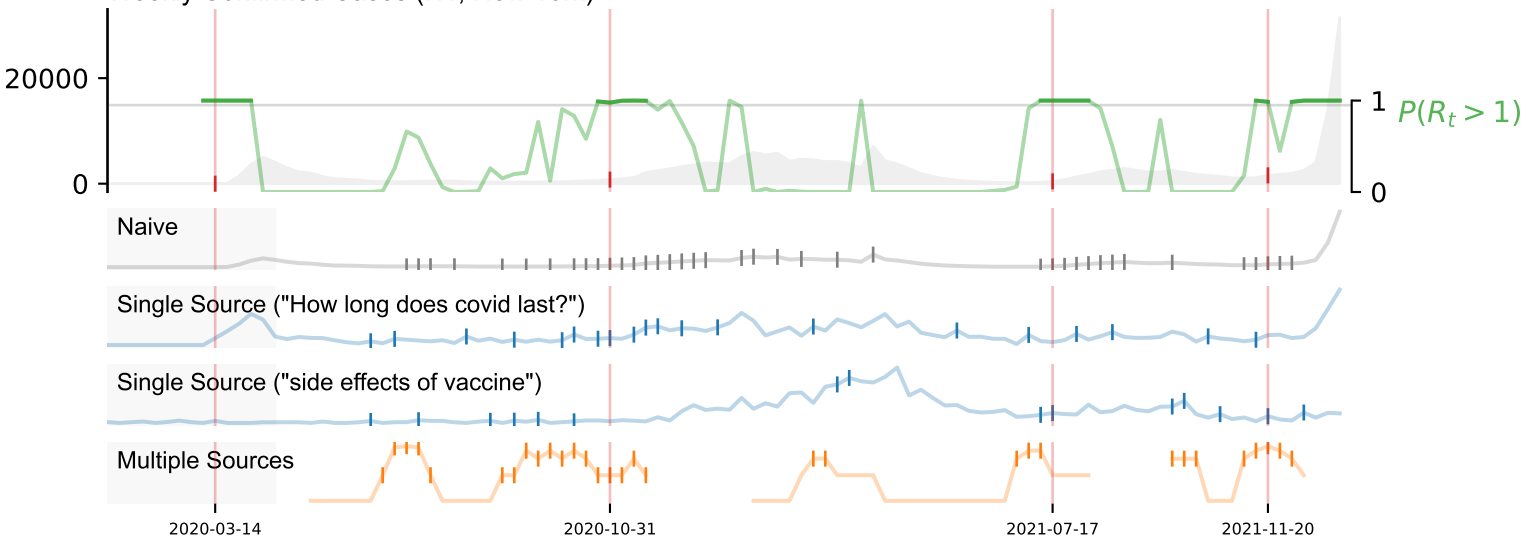

Weekly Confirmed Cases (NY, Queens)

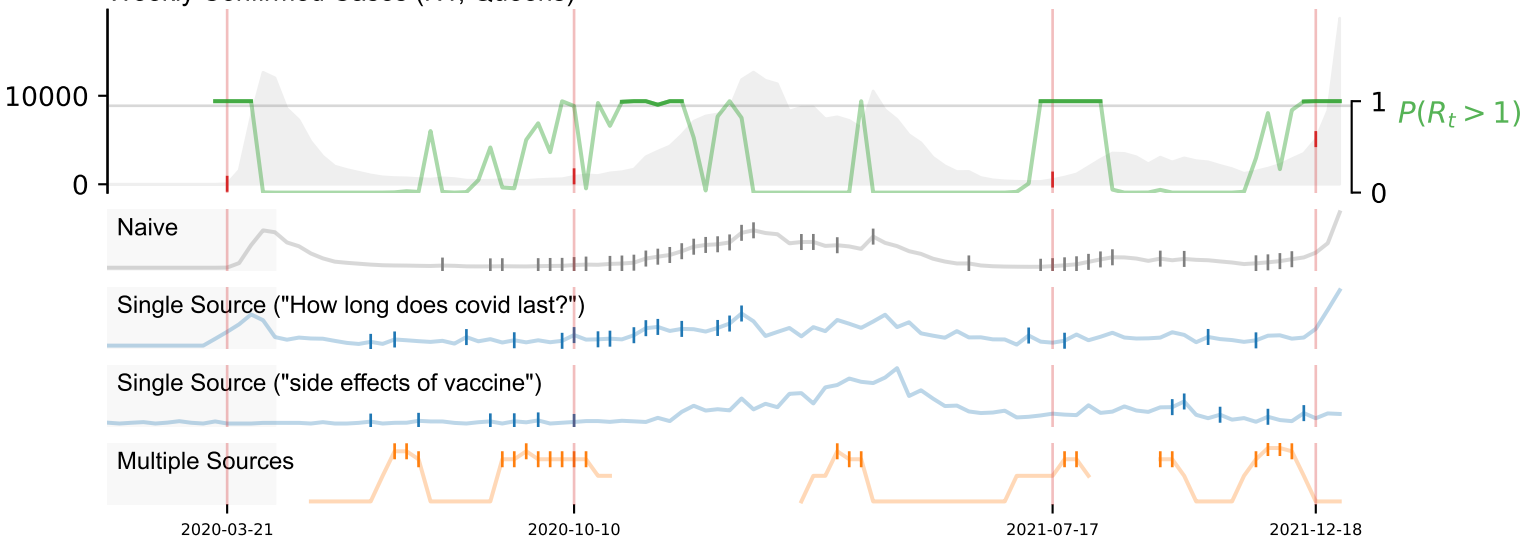

- Naive Method
- Single Source Method
- Multiple Sources Method
- $P(R_t > 1)$
- Gold Standard Event
- Signal Event
- Initial Training Period
- Gold Standard (JHU Cases)

Weekly Confirmed Cases (NY, Suffolk)

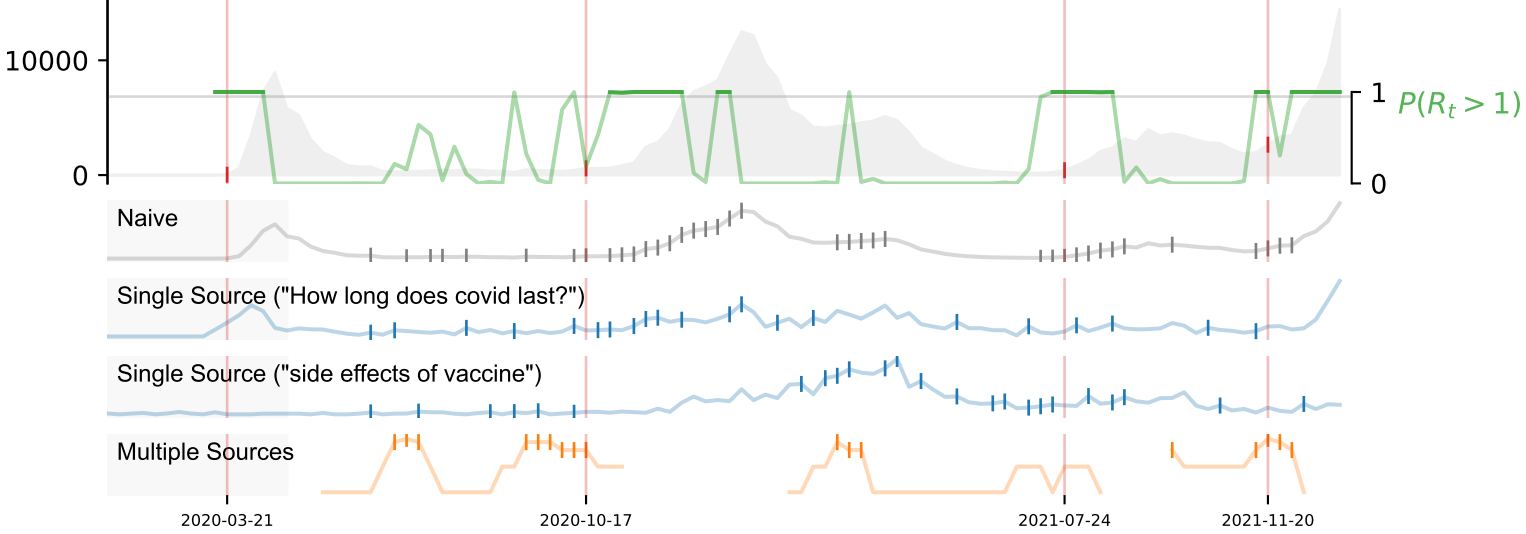

Weekly Confirmed Cases (OH, Cuyahoga)

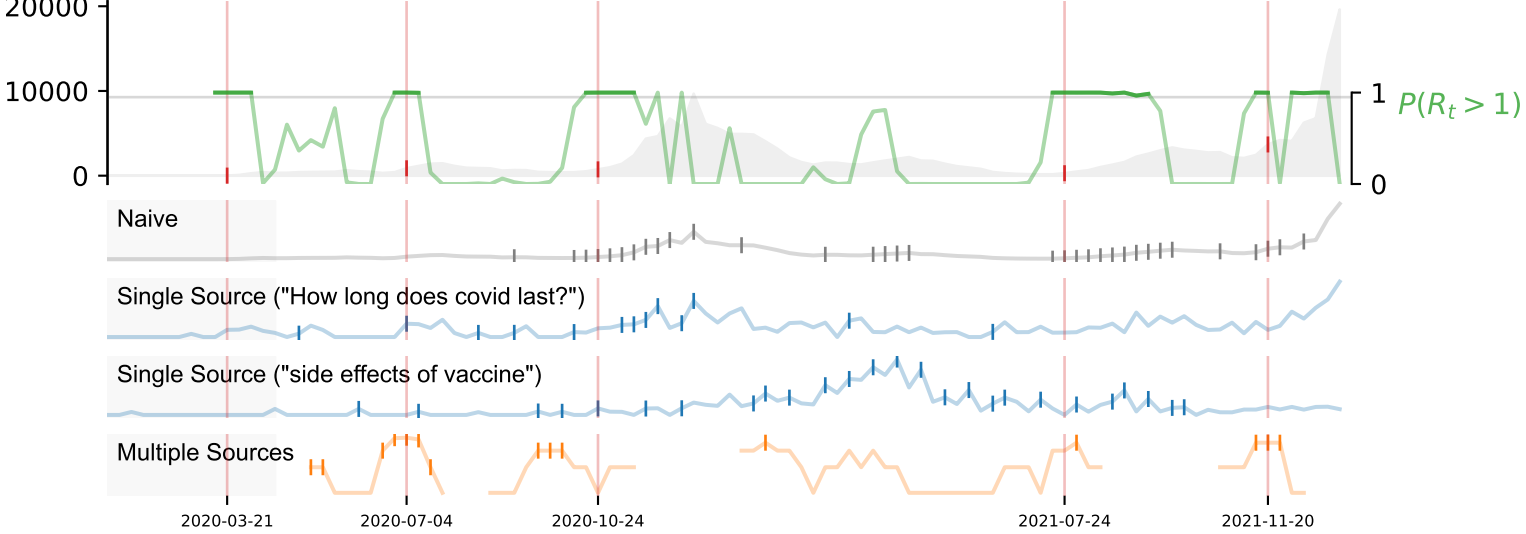

Weekly Confirmed Cases (OH, Franklin)

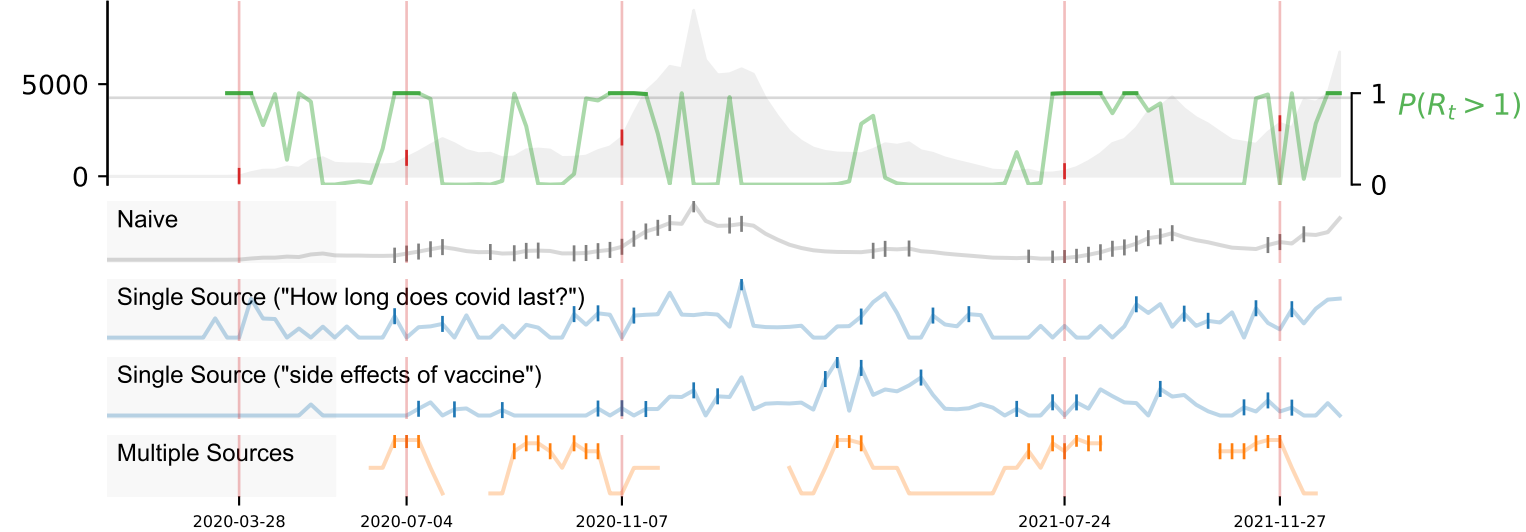

- Naive Method
- Single Source Method
- Multiple Sources Method
- $P(R_t > 1)$
- Gold Standard Event
- Signal Event
- Initial Training Period
- Gold Standard (JHU Cases)

Weekly Confirmed Cases (OH, Hamilton)

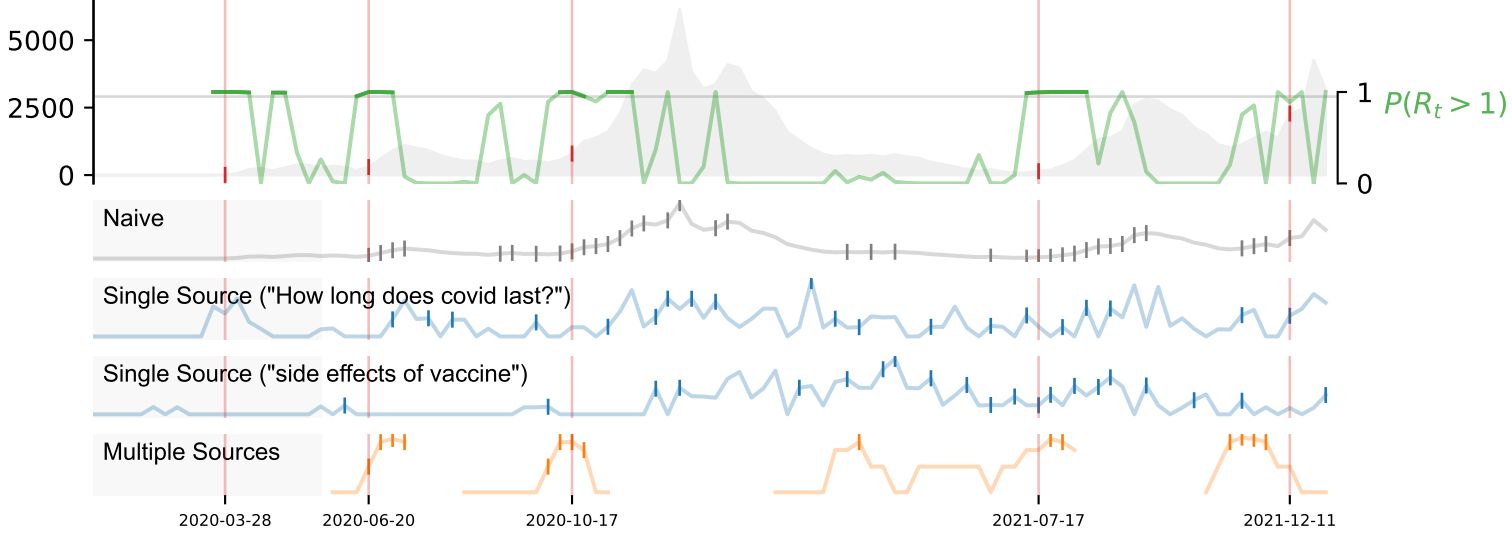

Weekly Confirmed Cases (OH, Summit)

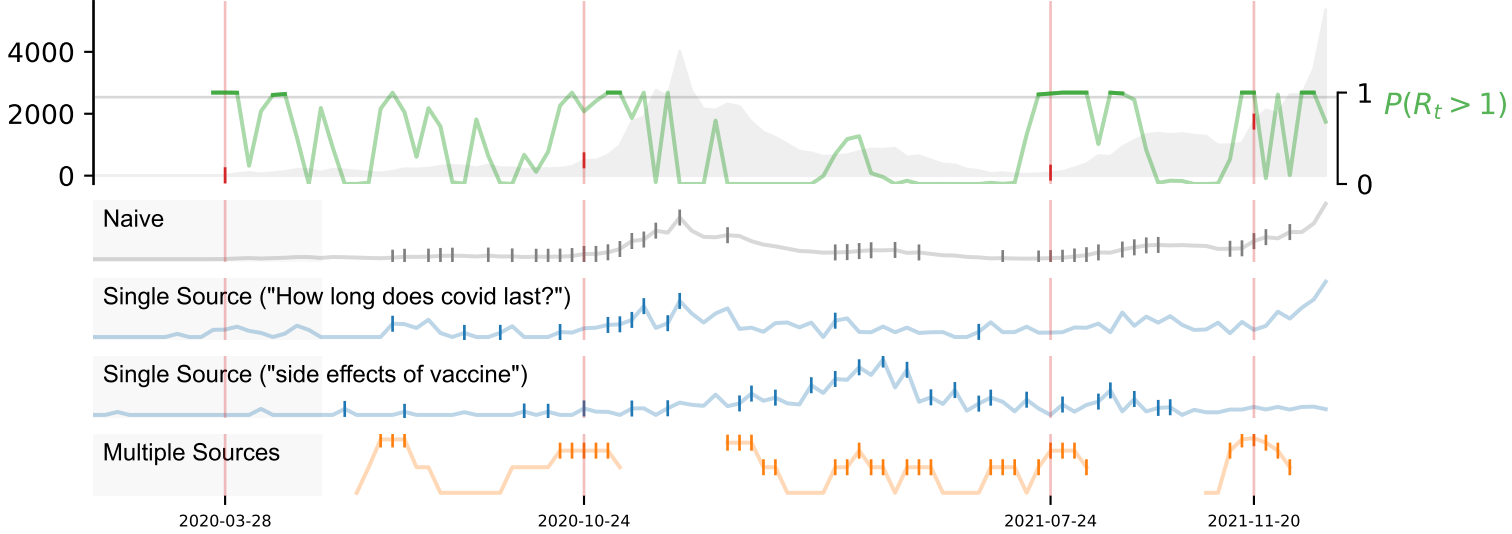

Weekly Confirmed Cases (OH, Warren)

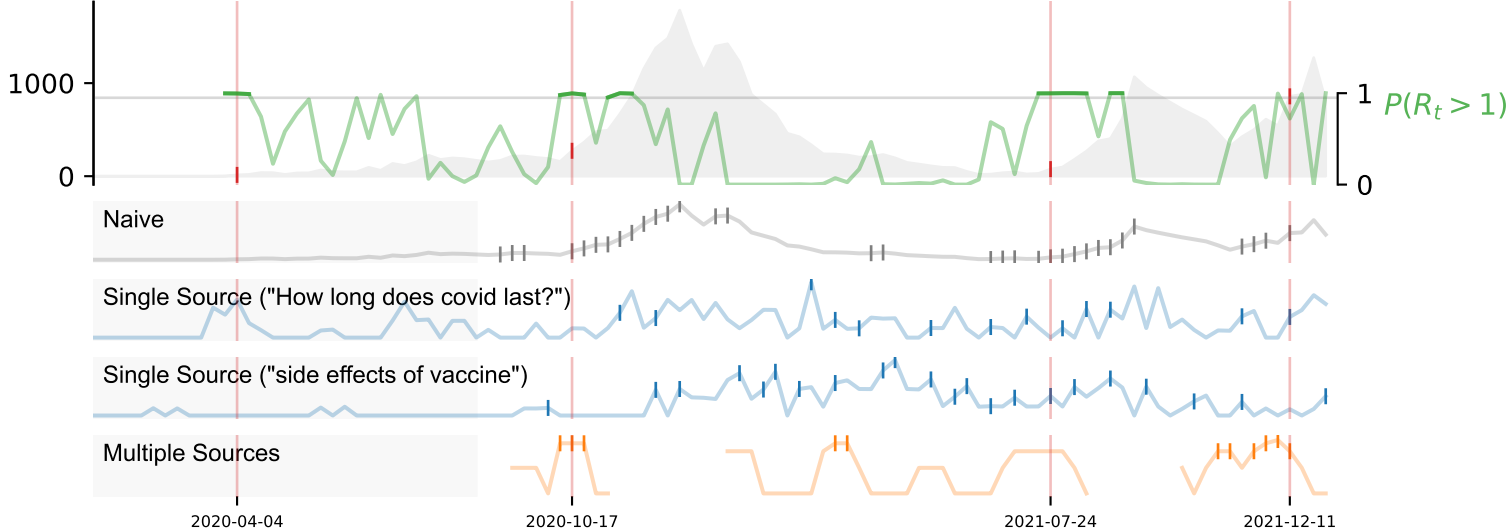

- Naive Method
- Single Source Method
- Multiple Sources Method
- $P(R_t > 1)$
- Gold Standard Event
- Signal Event
- Initial Training Period
- Gold Standard (JHU Cases)

Weekly Confirmed Cases (OR, Multnomah)

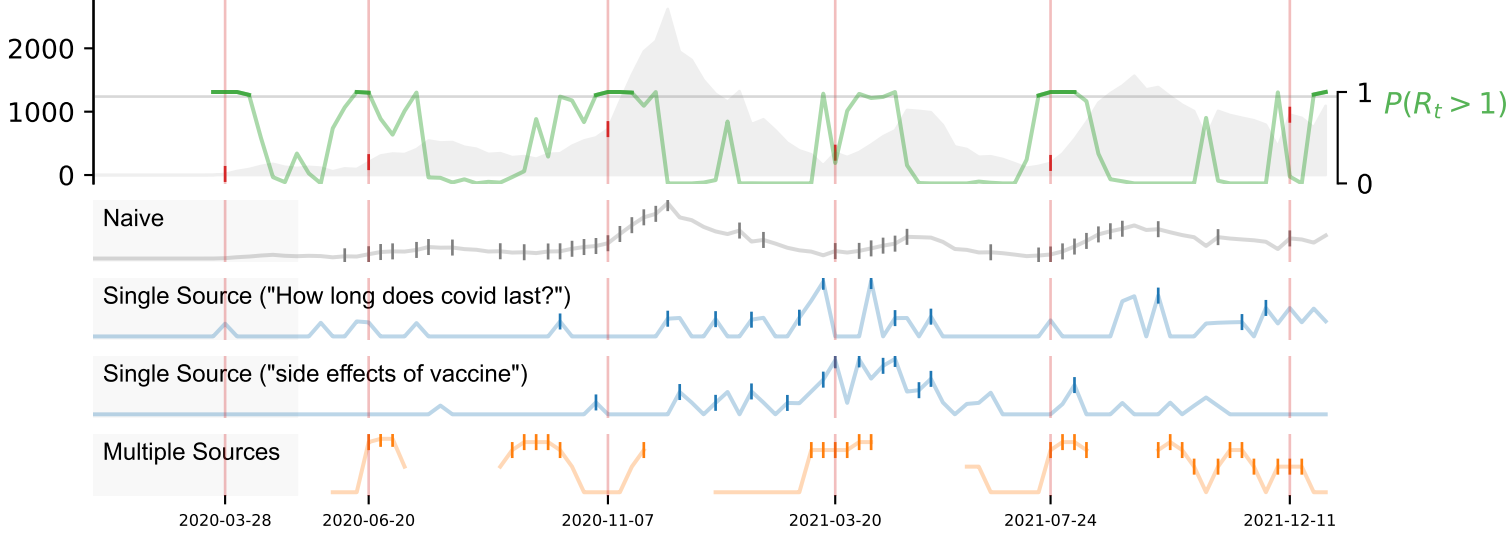

Weekly Confirmed Cases (PA, Allegheny)

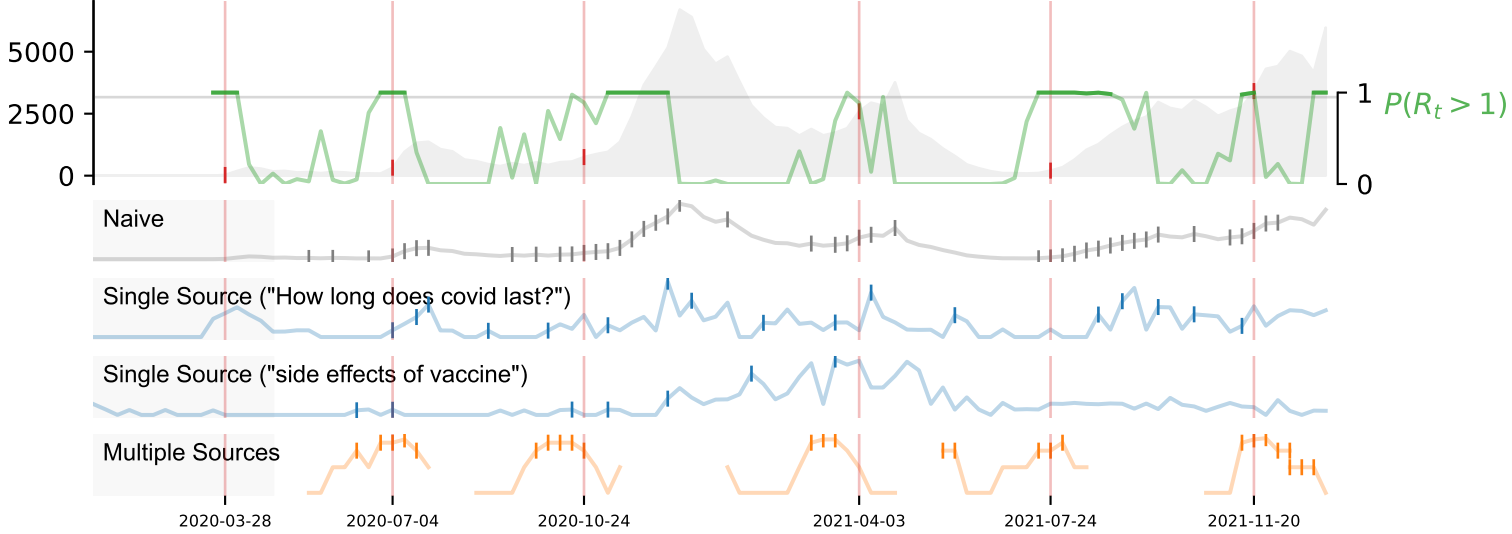

Weekly Confirmed Cases (PA, Philadelphia)

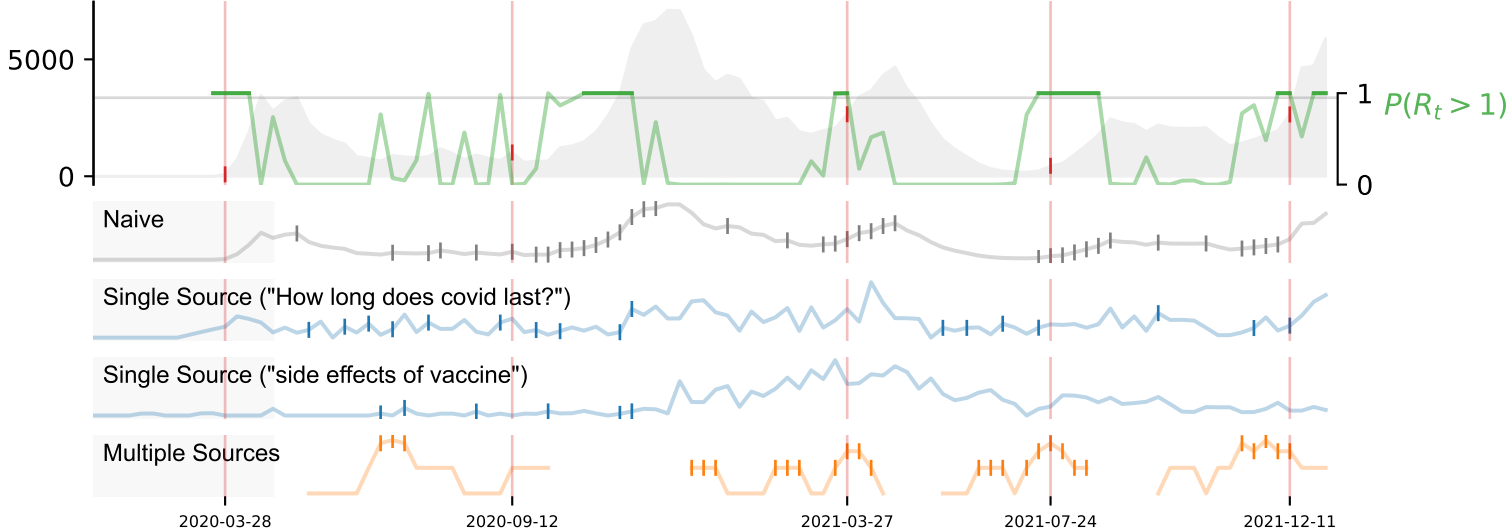



- Naive Method
- Single Source Method
- Multiple Sources Method
- $P(R_t > 1)$
- Gold Standard Event
- Signal Event
- Initial Training Period
- Gold Standard (JHU Cases)

Weekly Confirmed Cases (SC, Anderson)

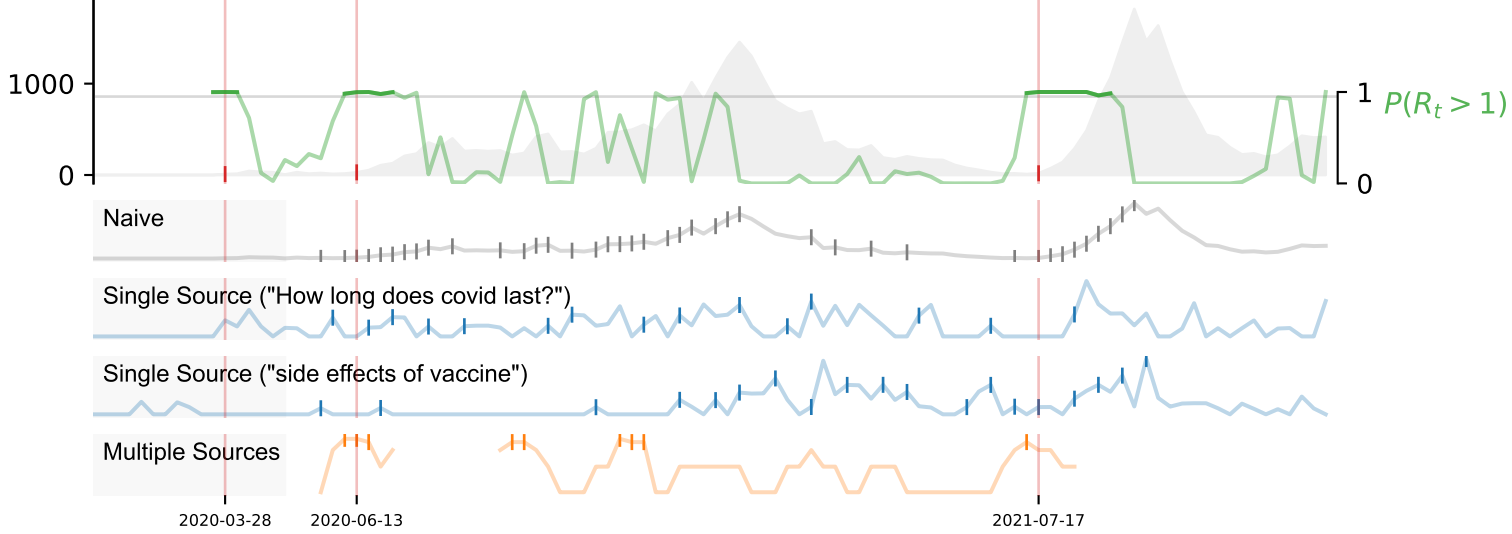

Weekly Confirmed Cases (SC, Charleston)

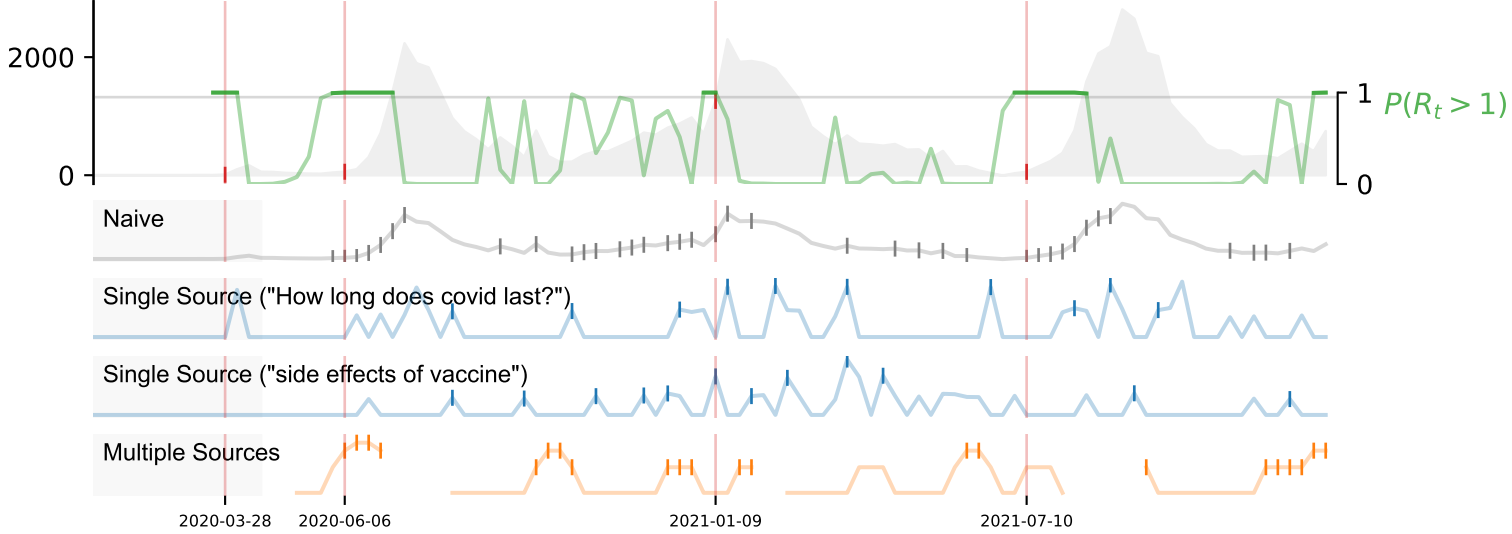

Weekly Confirmed Cases (SC, Richland)

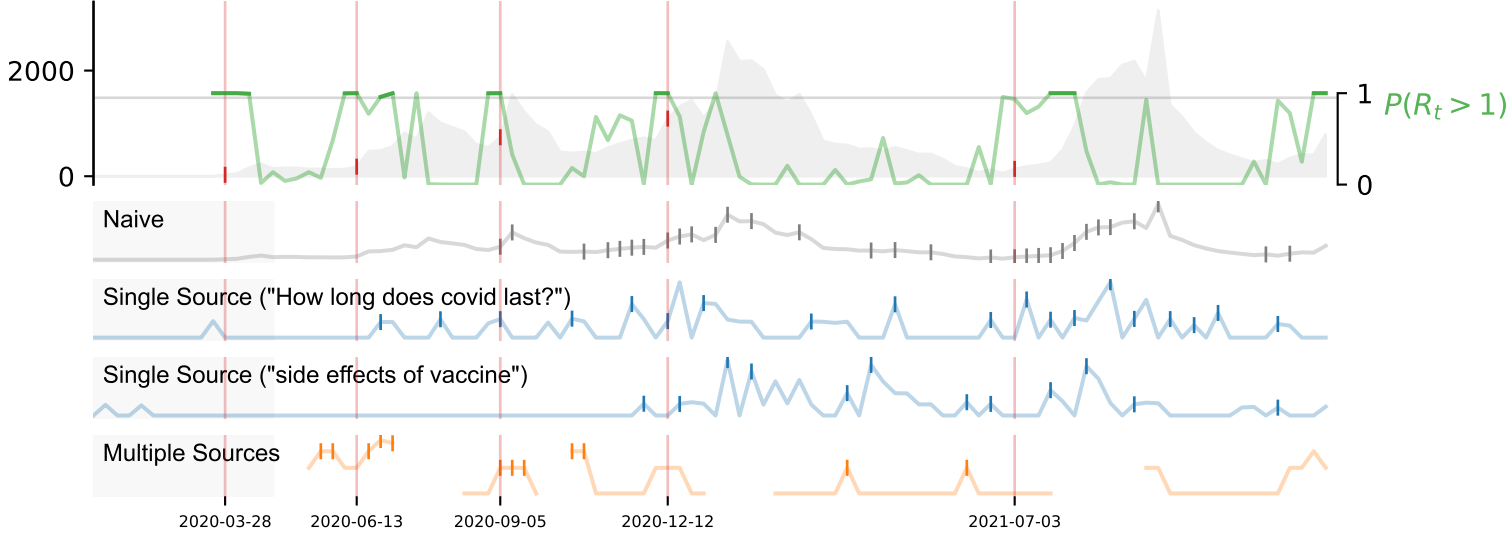

Weekly Confirmed Cases (TN, Blount)

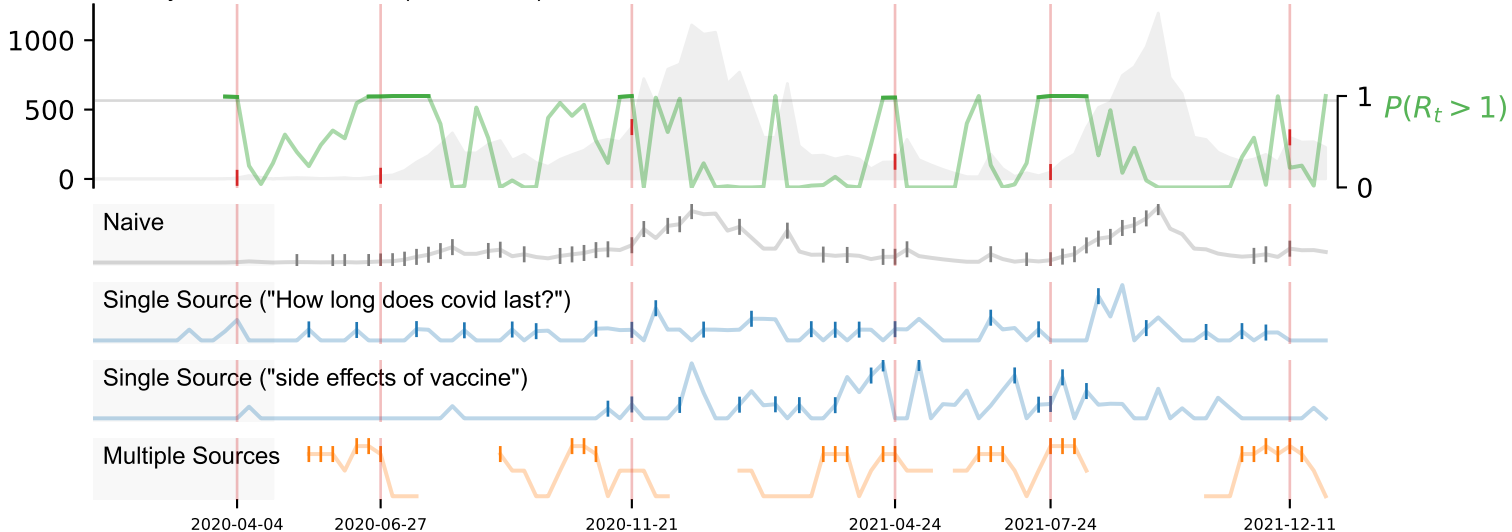

Weekly Confirmed Cases (TN, Davidson)

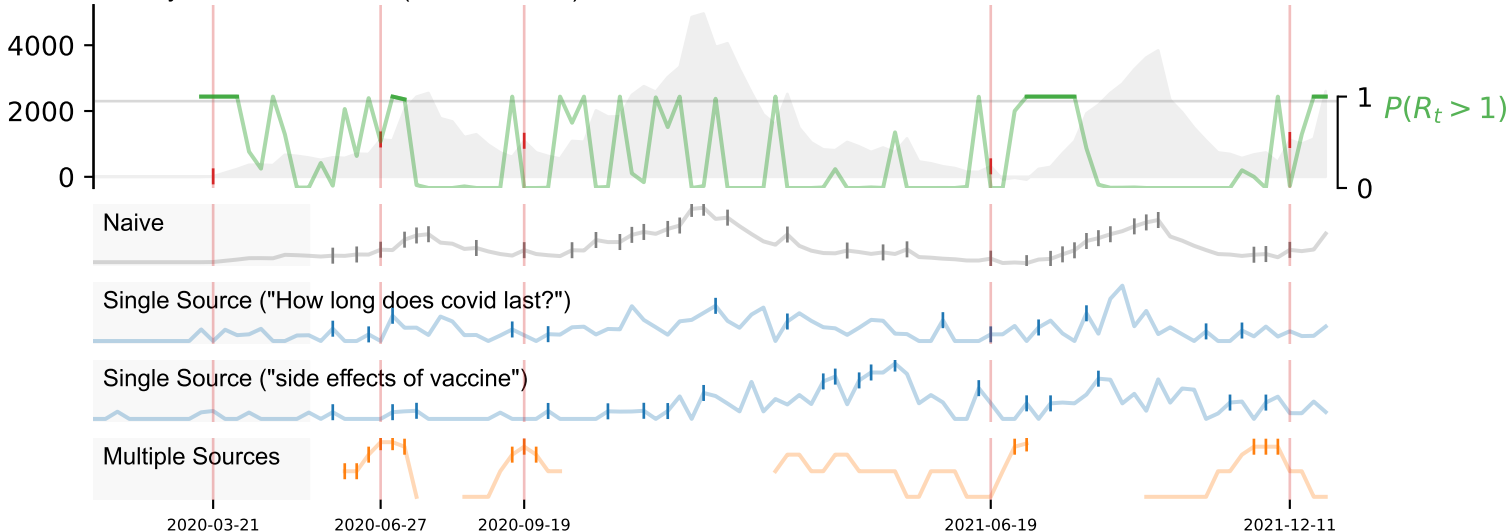

Weekly Confirmed Cases (TN, Knox)

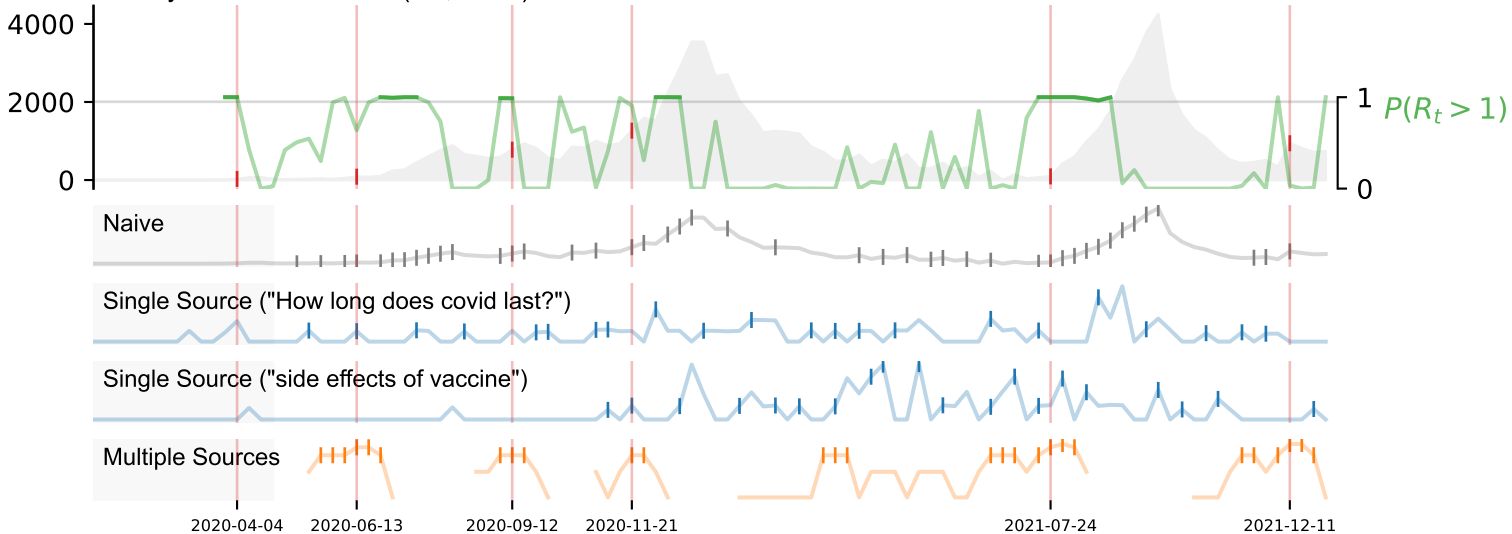

- Naive Method
- Single Source Method
- Multiple Sources Method
- $P(R_t > 1)$
- Gold Standard Event
- Signal Event
- Initial Training Period
- Gold Standard (JHU Cases)

Weekly Confirmed Cases (TN, Sevier)

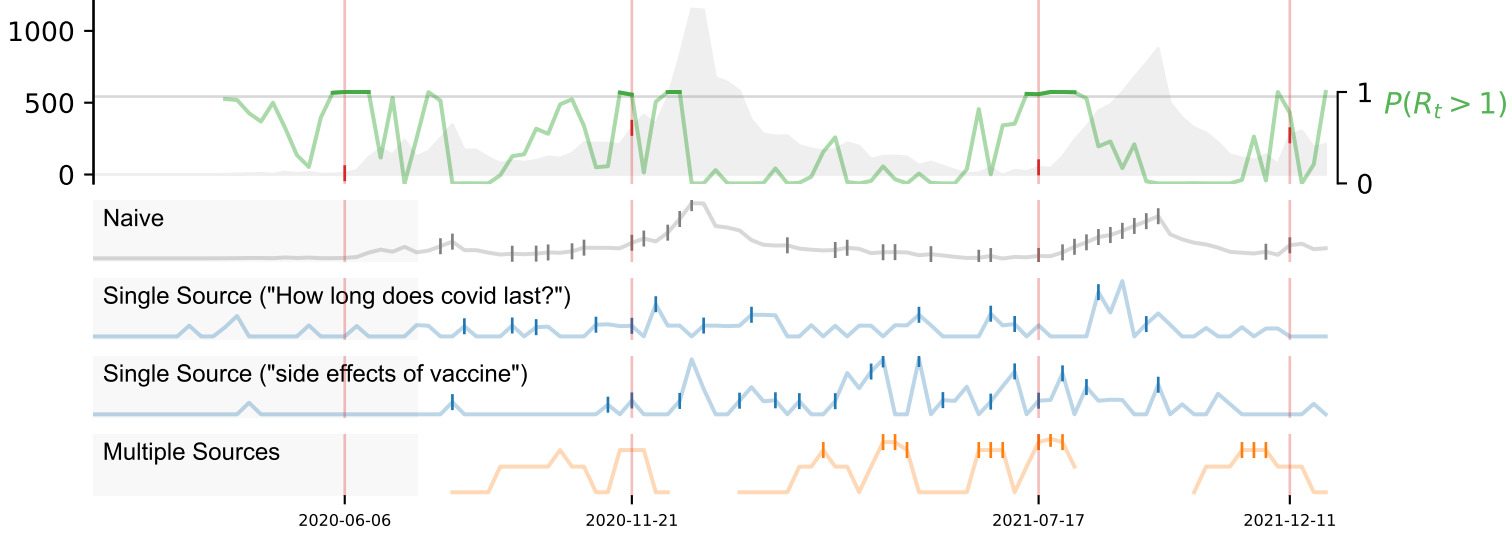

Weekly Confirmed Cases (TN, Shelby)

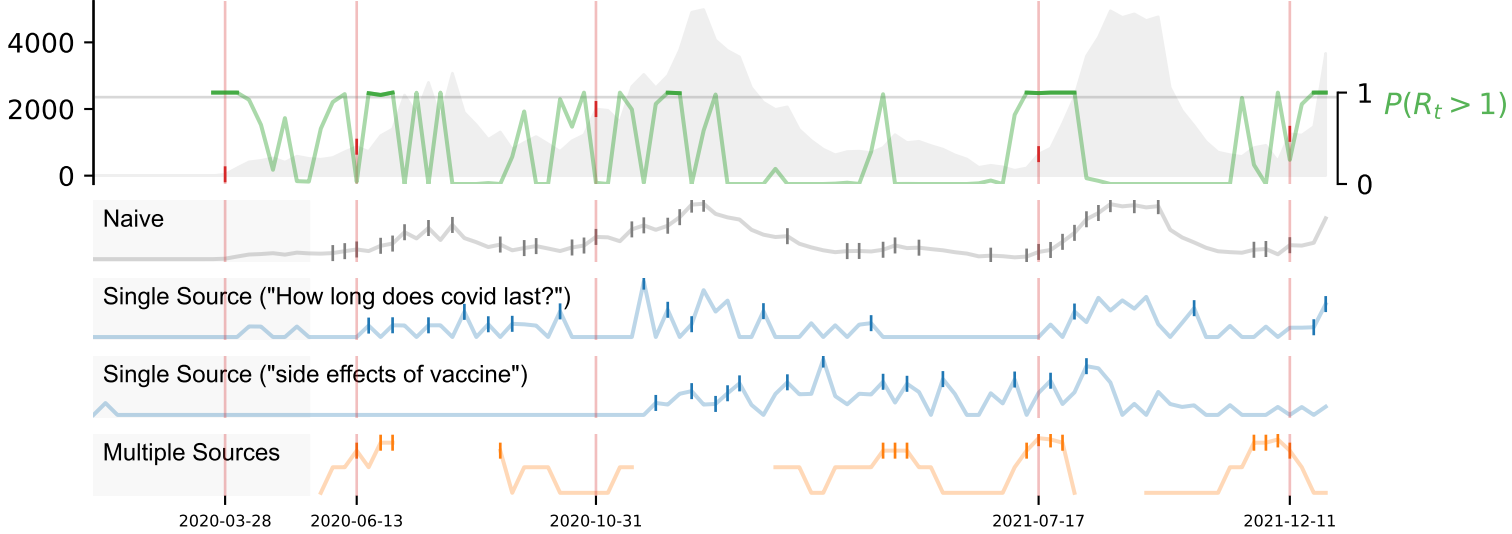

Weekly Confirmed Cases (TX, Bexar)

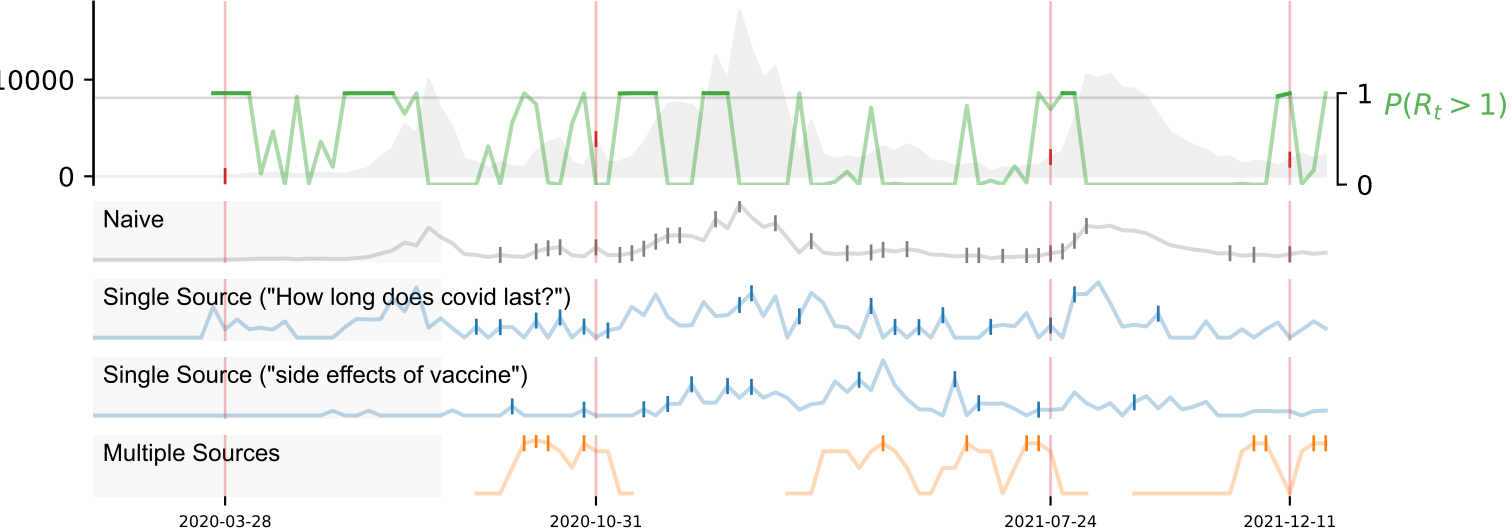

- Naive Method
- Single Source Method
- Multiple Sources Method
- $P(R_t > 1)$
- Gold Standard Event
- Signal Event
- Initial Training Period
- Gold Standard (JHU Cases)

Weekly Confirmed Cases (TX, Collin)

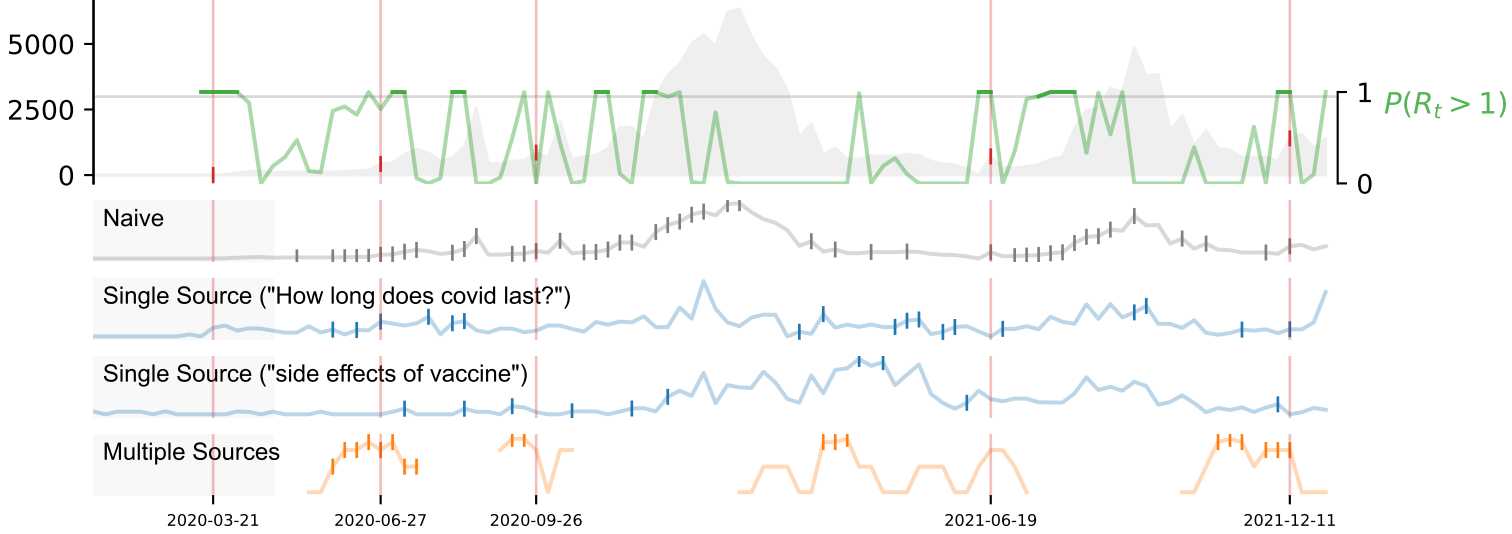

Weekly Confirmed Cases (TX, Dallas)

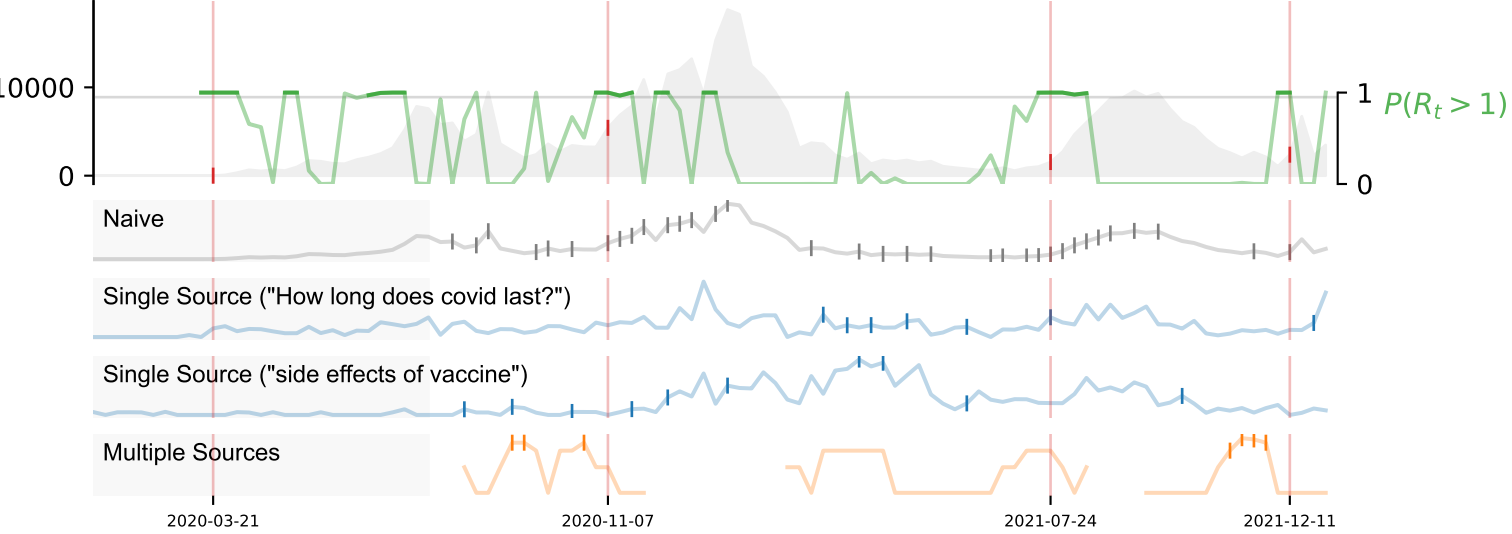

Weekly Confirmed Cases (TX, Harris)

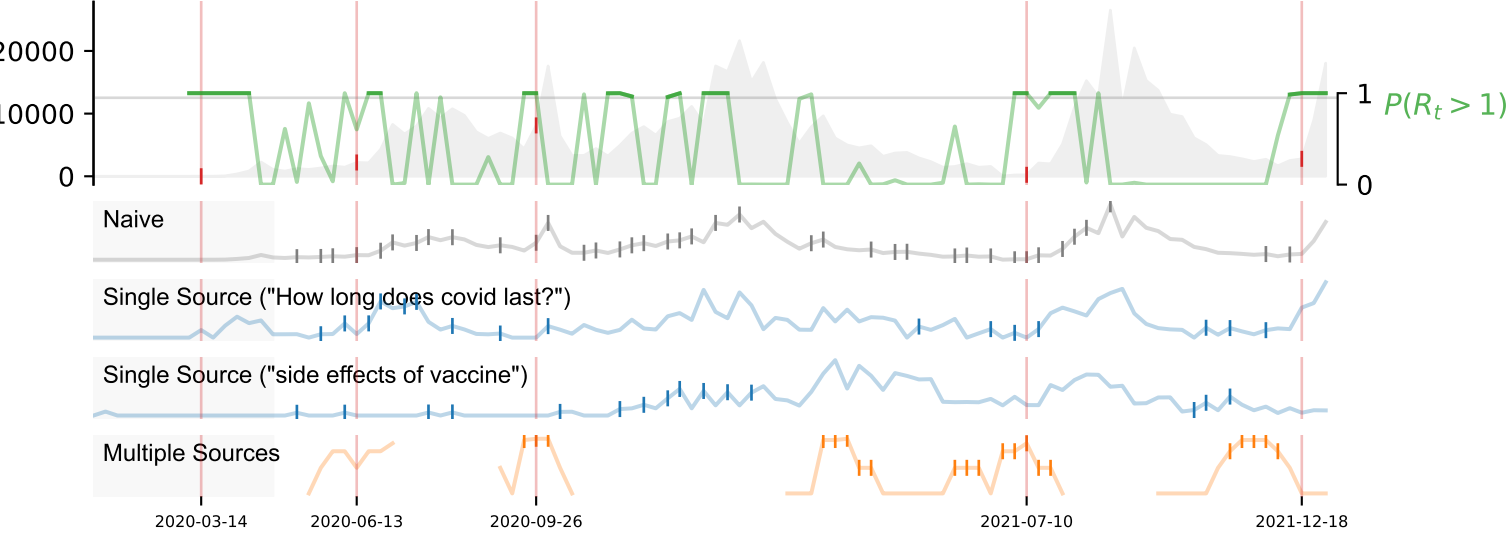

- Naive Method
- Single Source Method
- Multiple Sources Method
- $P(R_t > 1)$
- Gold Standard Event
- Signal Event
- Initial Training Period
- Gold Standard (JHU Cases)

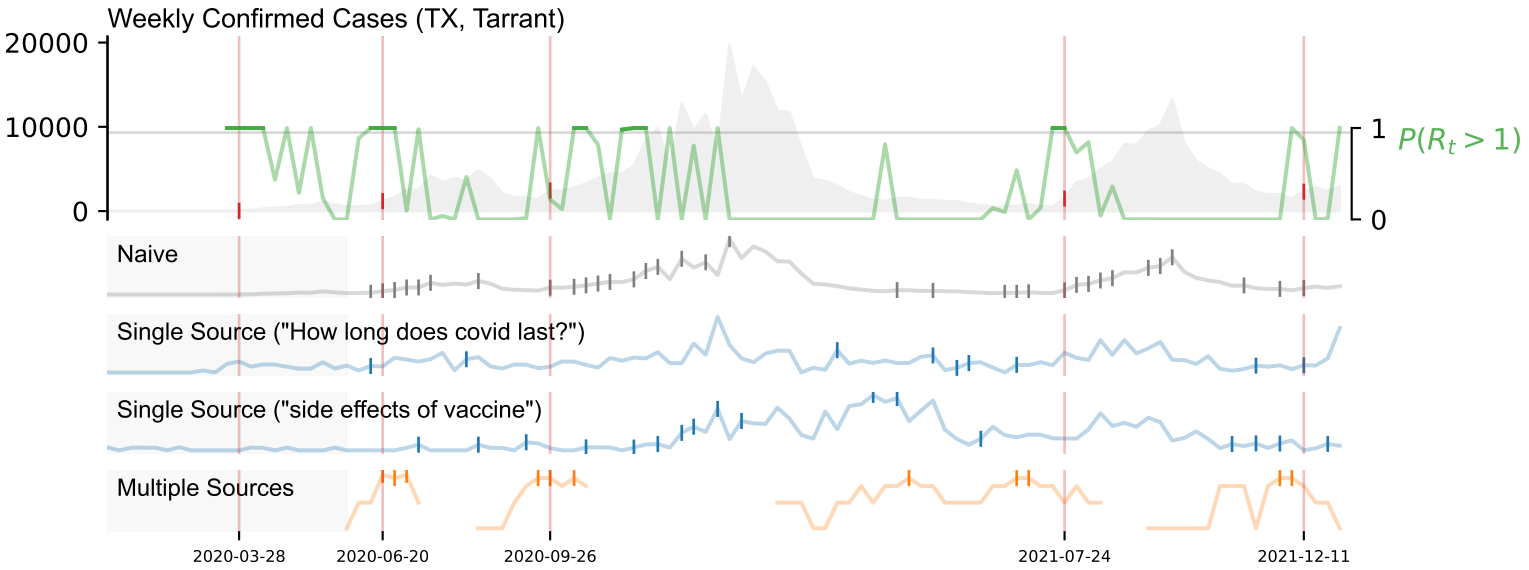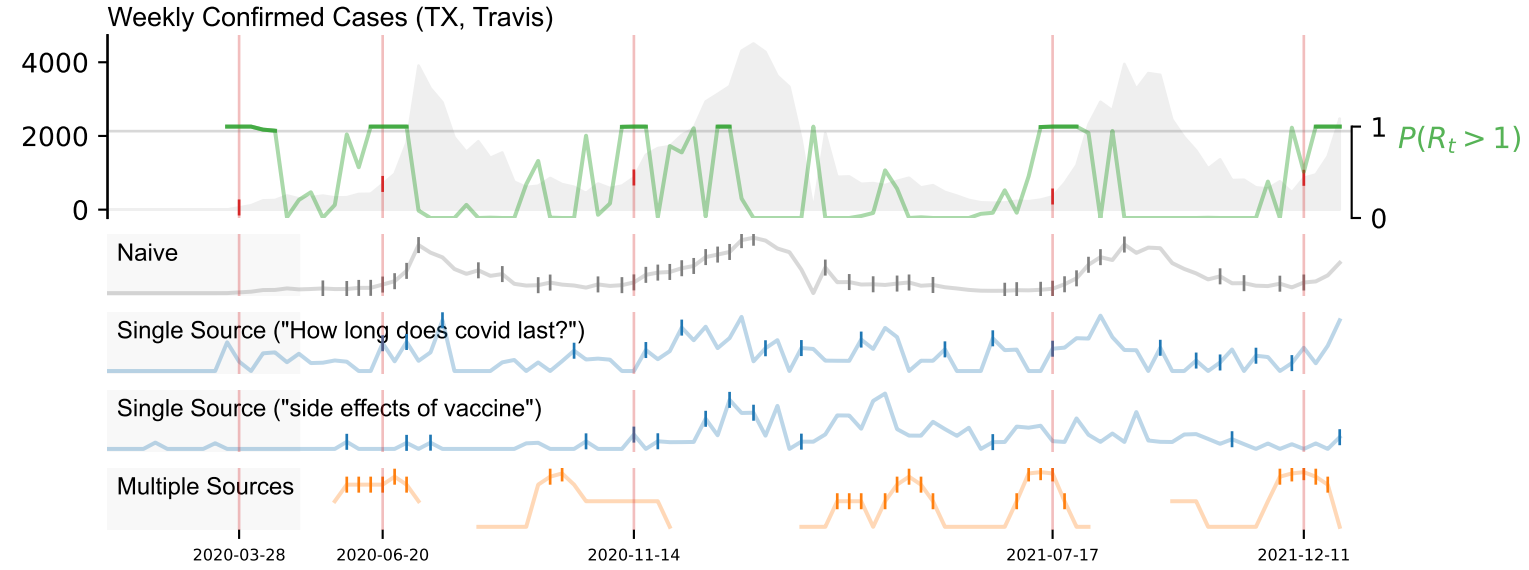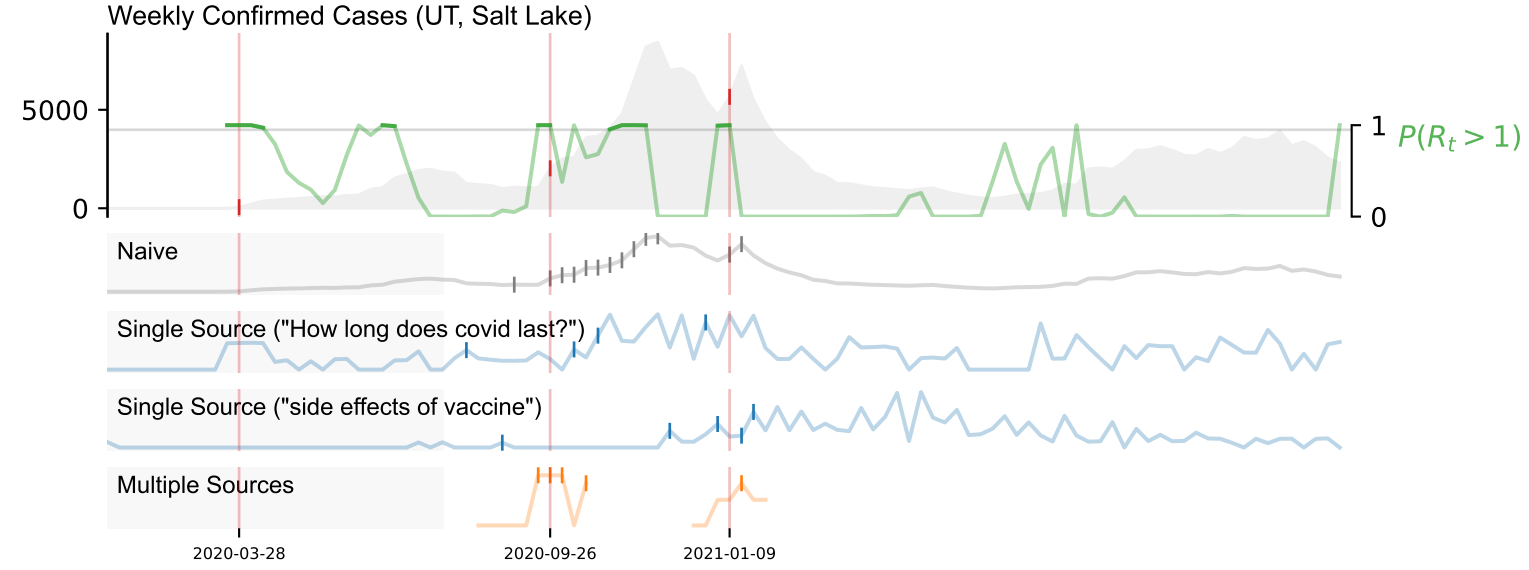

- Naive Method
- Single Source Method
- Multiple Sources Method
- $P(R_t > 1)$
- Gold Standard Event
- Signal Event
- Initial Training Period
- Gold Standard (JHU Cases)

Weekly Confirmed Cases (VA, Albemarle)

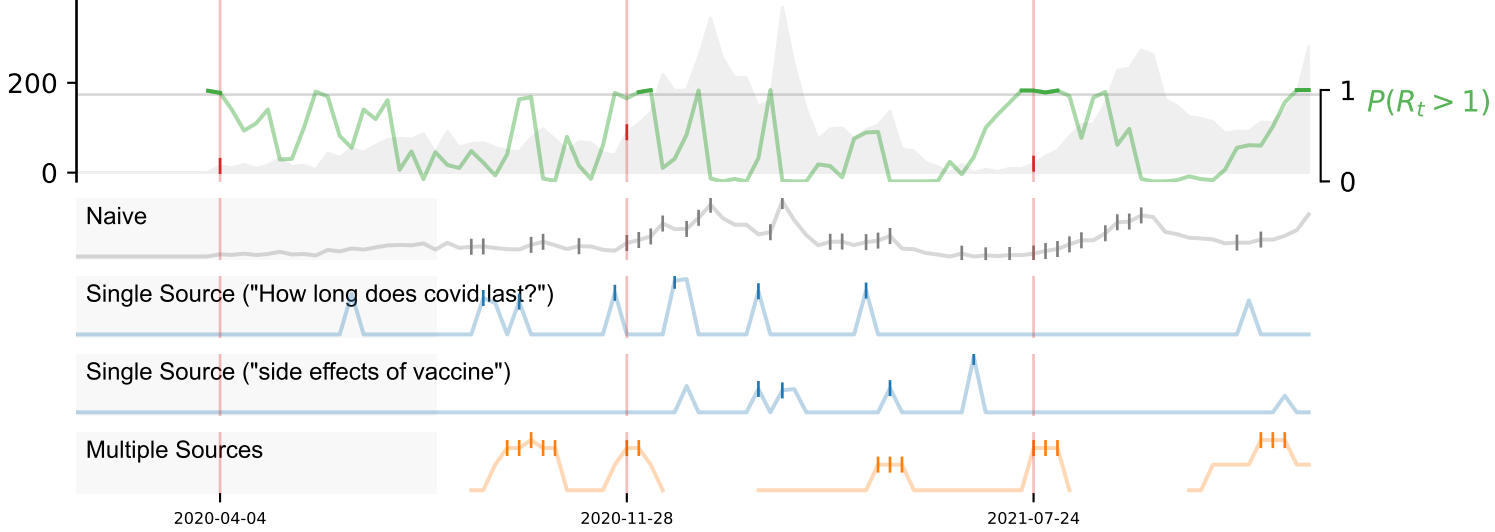

Weekly Confirmed Cases (VA, Charlottesville)

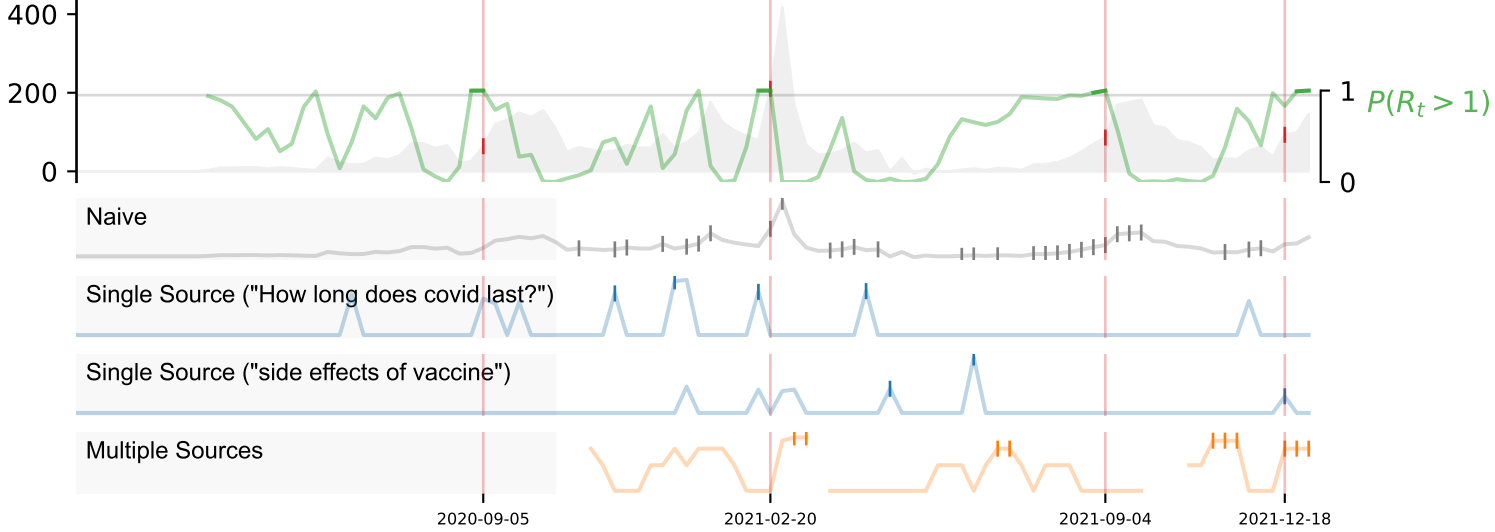

Weekly Confirmed Cases (VA, Fairfax)

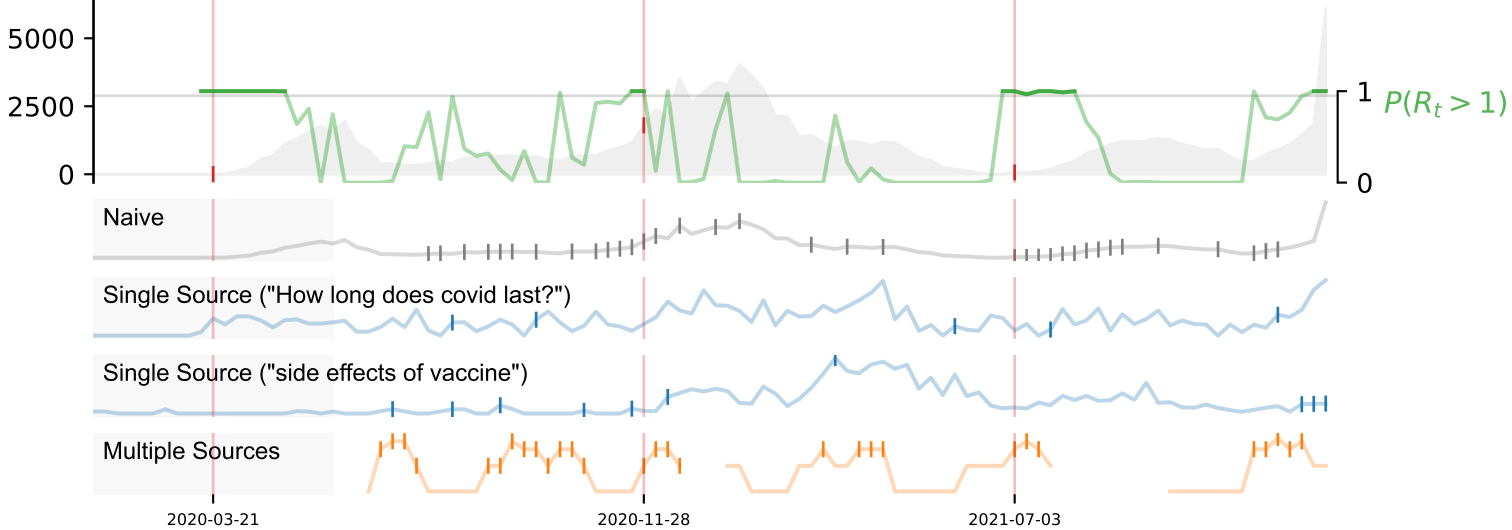

Figures S1-S49.

The probability of resurgence  $P(R_t > 1)$  (in green) and the different events generated by the Naive (gray), Single Source (blue) and Multiple Source methods (orange) at both county and state level.

- Naive Method
- Single Source Method
- Multiple Sources Method
- $P(R_t > 1)$
- Gold Standard Event
- Signal Event
- Initial Training Period
- Gold Standard (JHU Cases)

Weekly Confirmed Cases (Alabama)

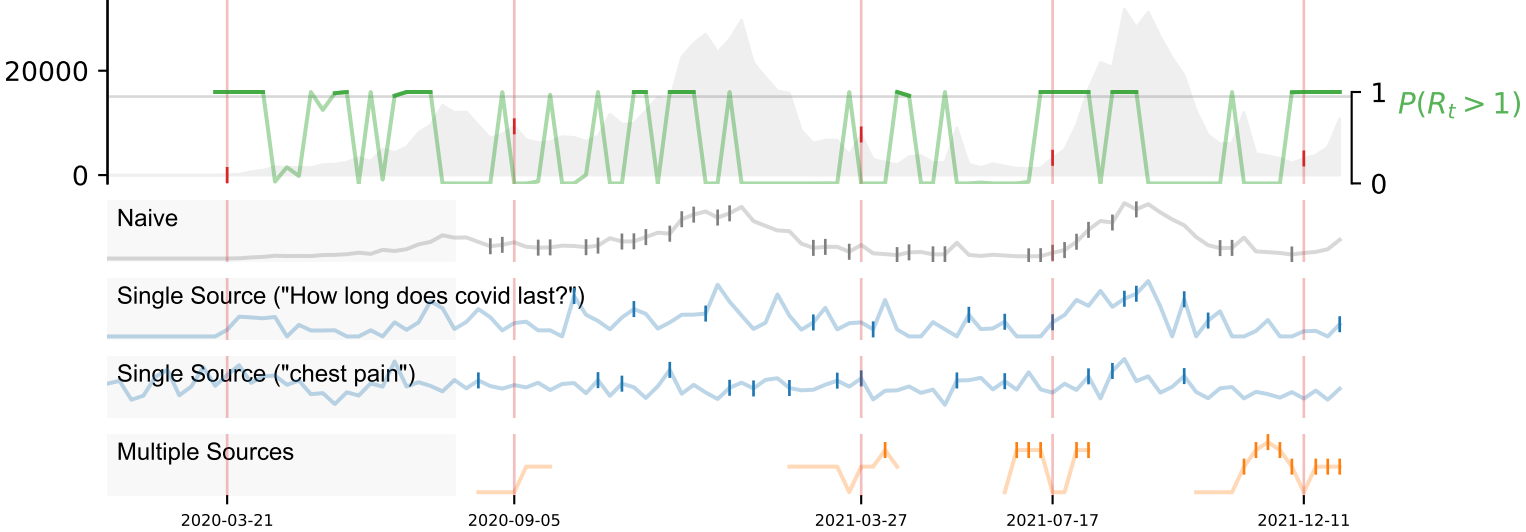

Weekly Confirmed Cases (Alaska)

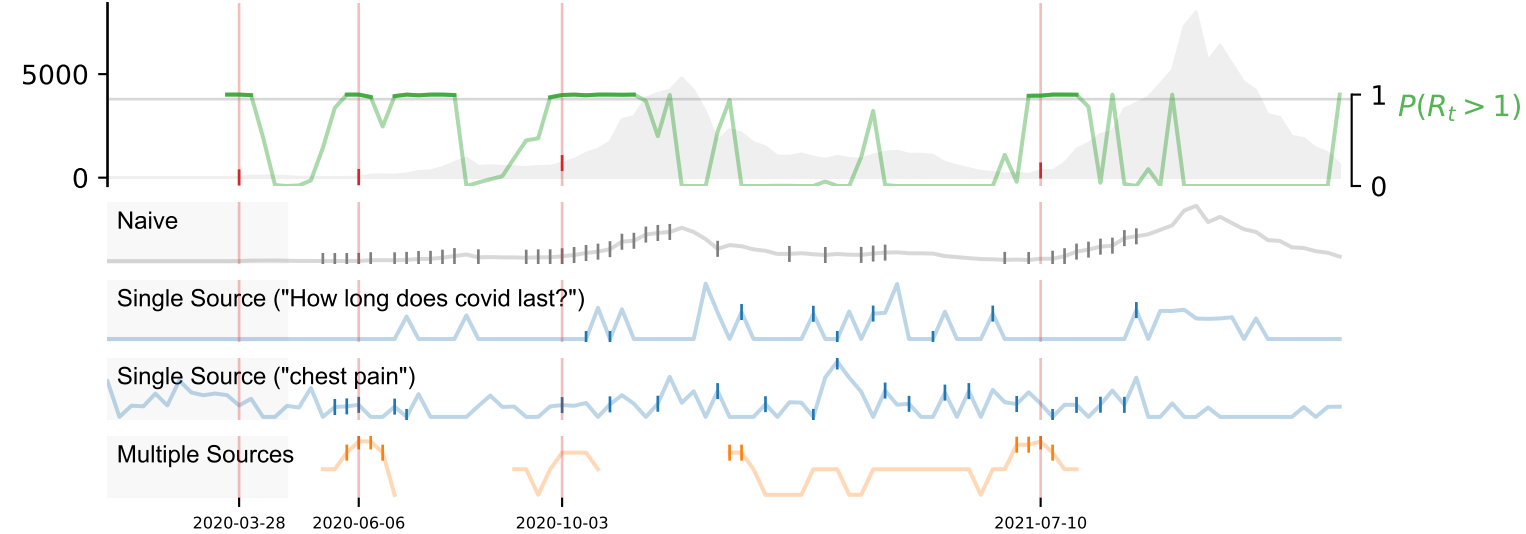

Weekly Confirmed Cases (Arizona)

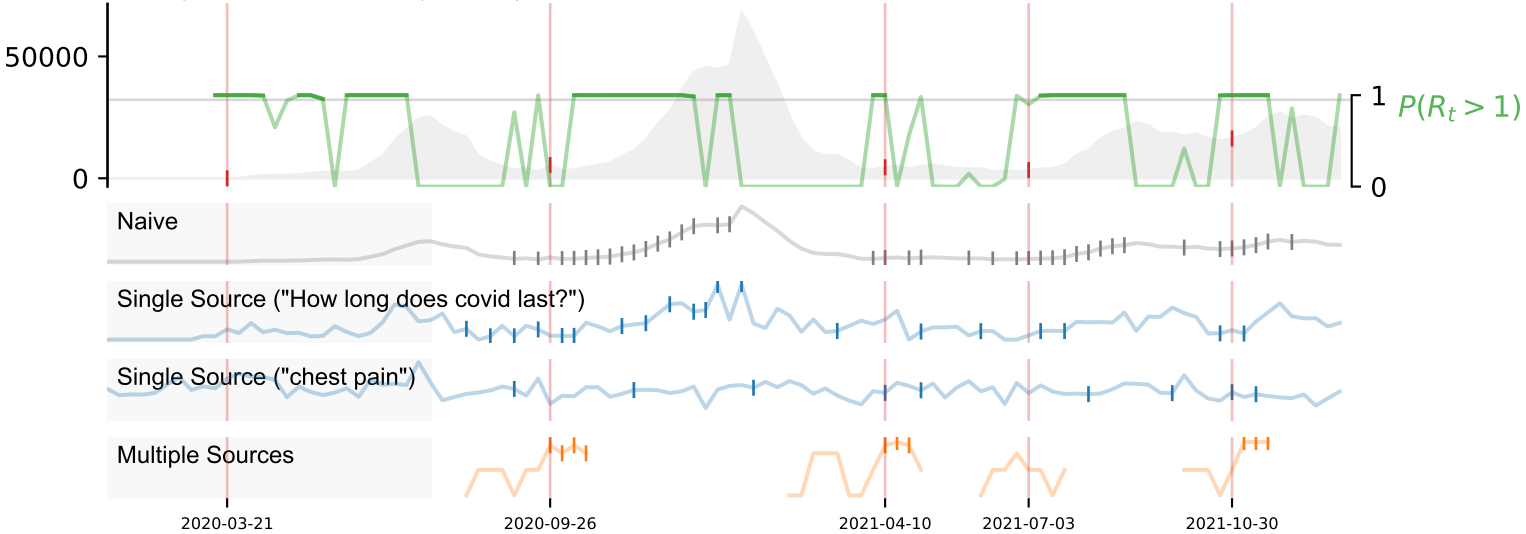



- Naive Method
- Single Source Method
- Multiple Sources Method
- $P(R_t > 1)$
- Gold Standard Event
- Signal Event
- Initial Training Period
- Gold Standard (JHU Cases)

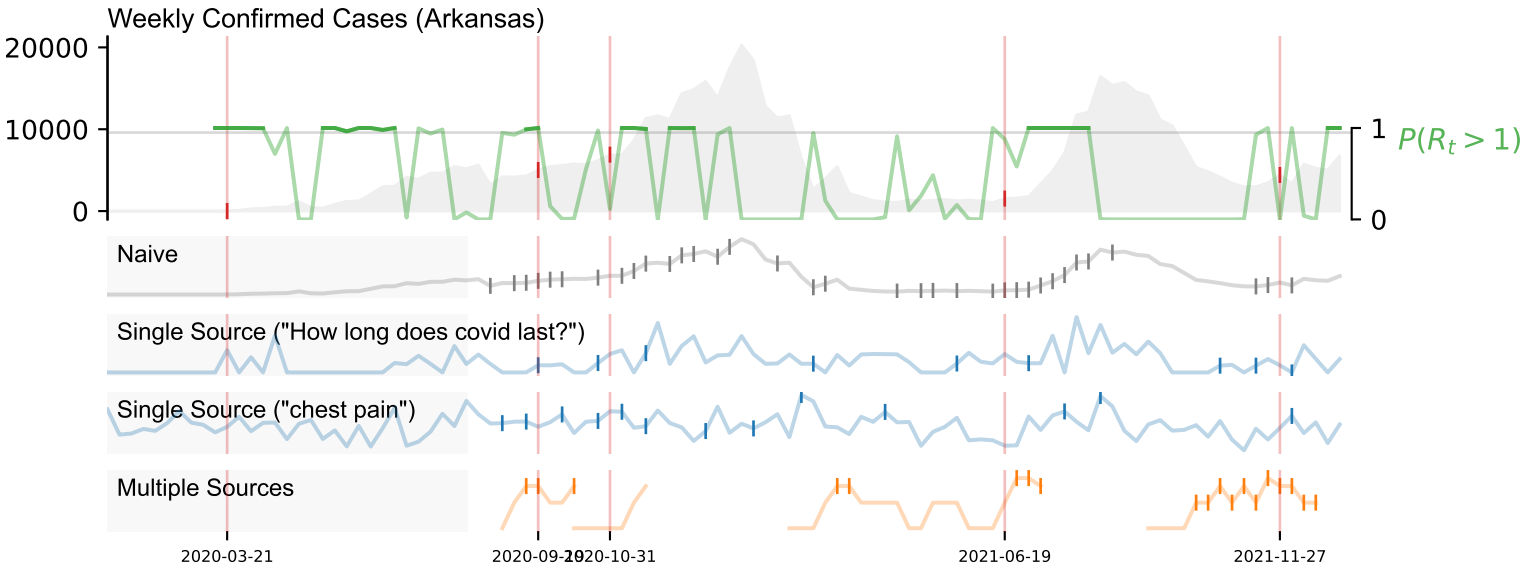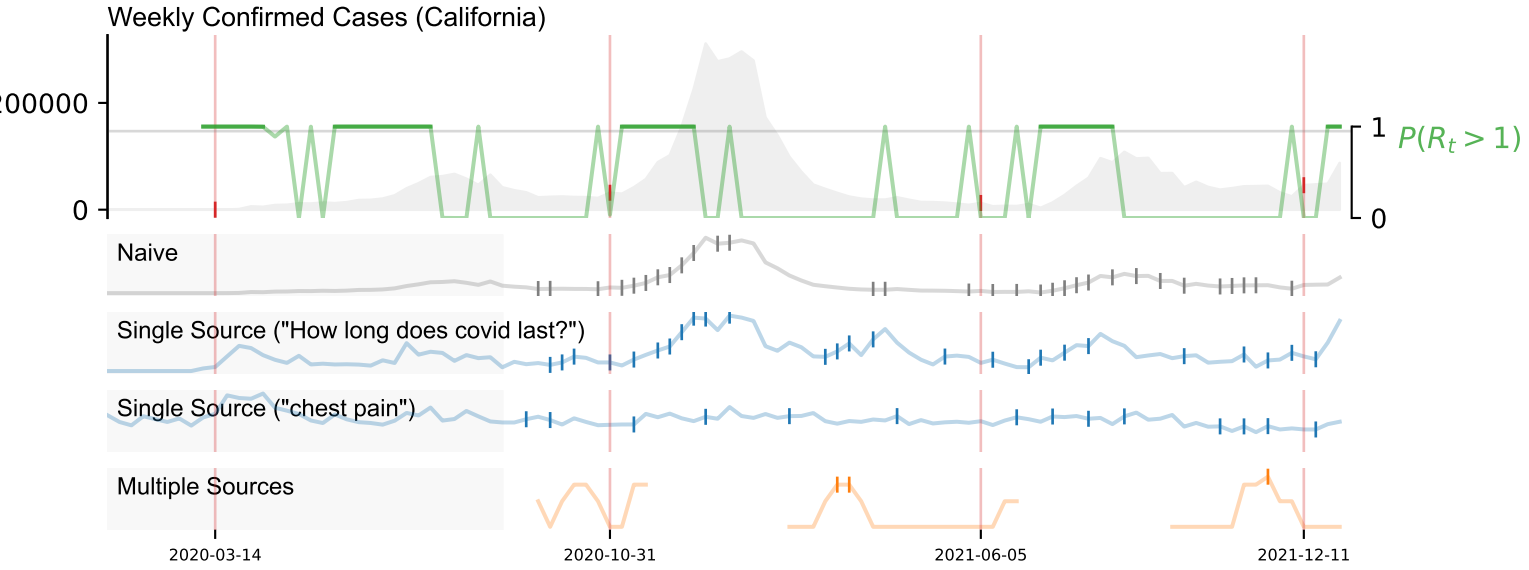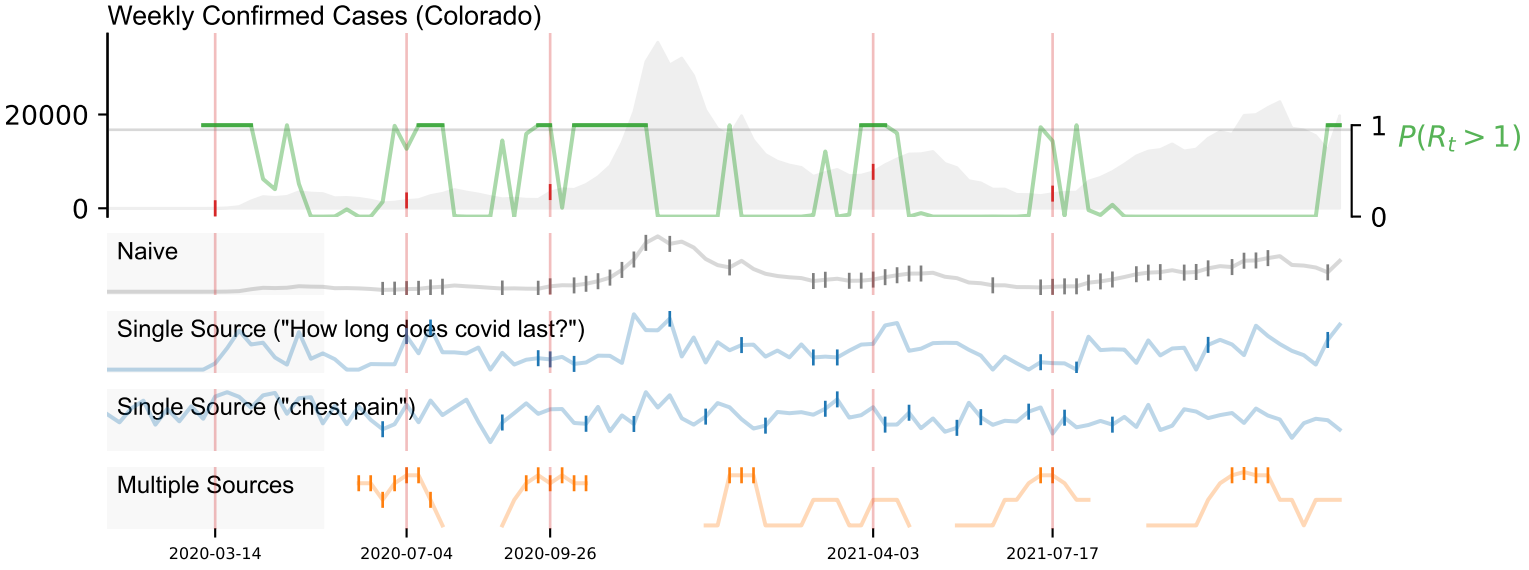

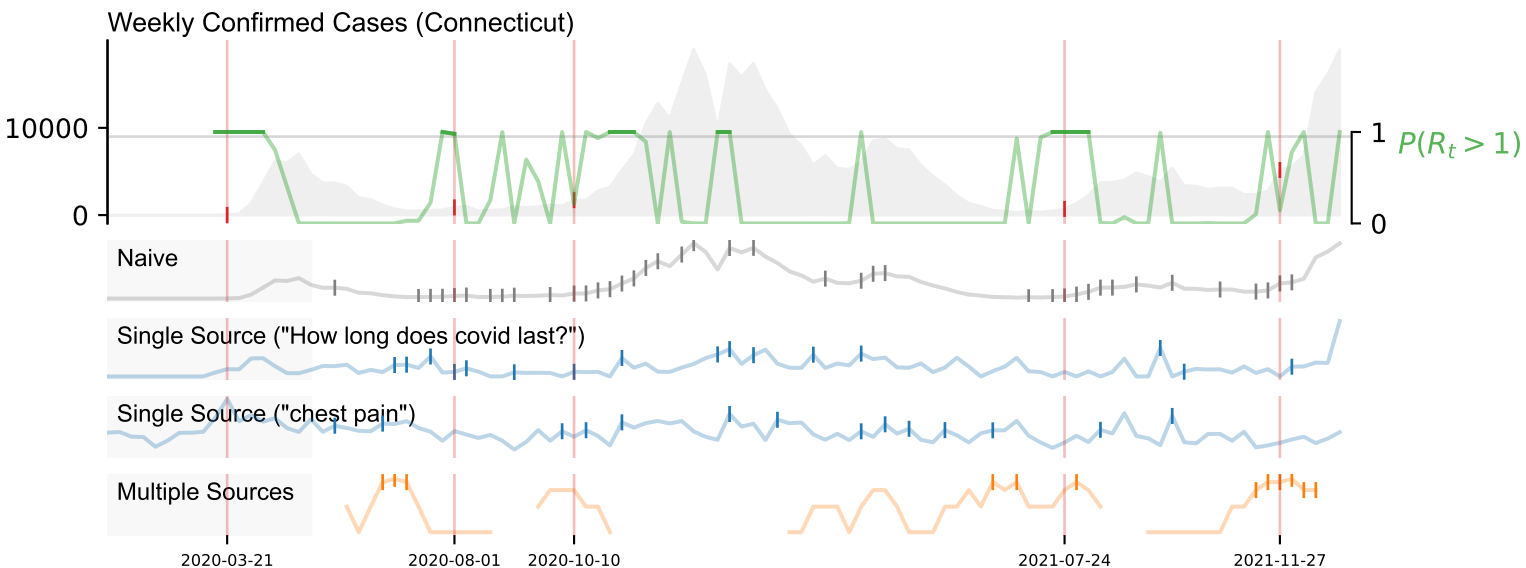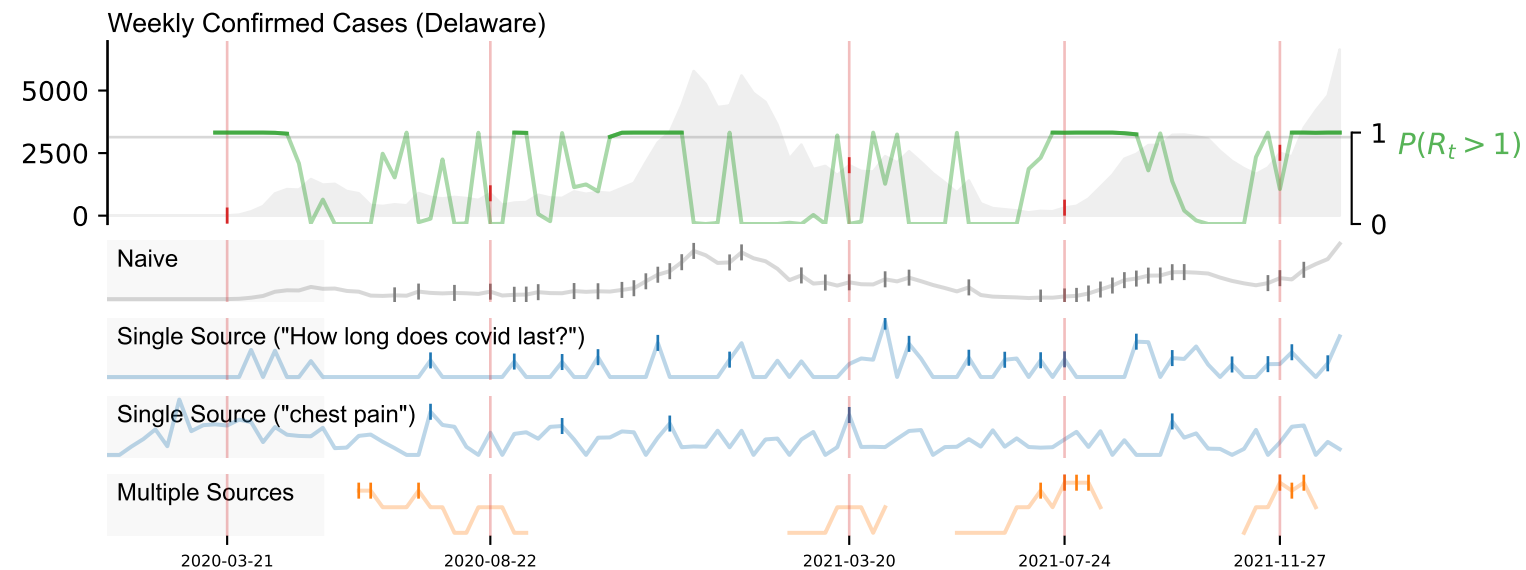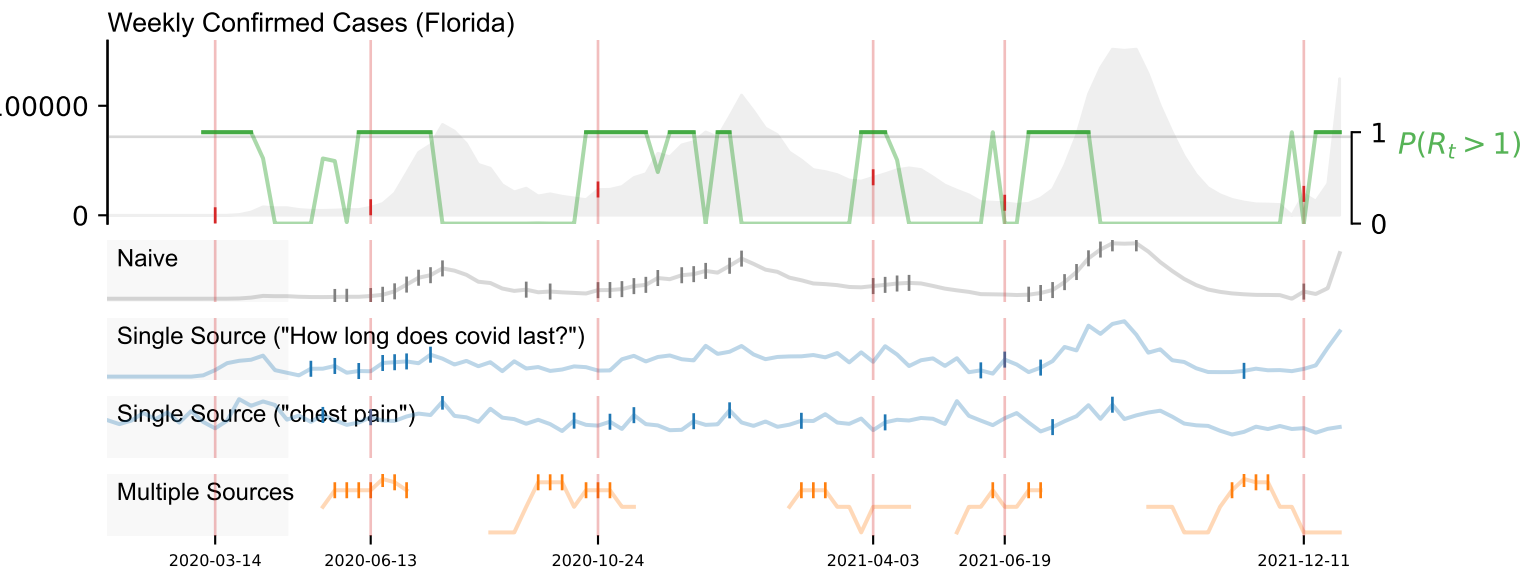

- Naive Method
- Single Source Method
- Multiple Sources Method
- $P(R_t > 1)$
- Gold Standard Event
- Signal Event
- Initial Training Period
- Gold Standard (JHU Cases)

Weekly Confirmed Cases (Georgia)

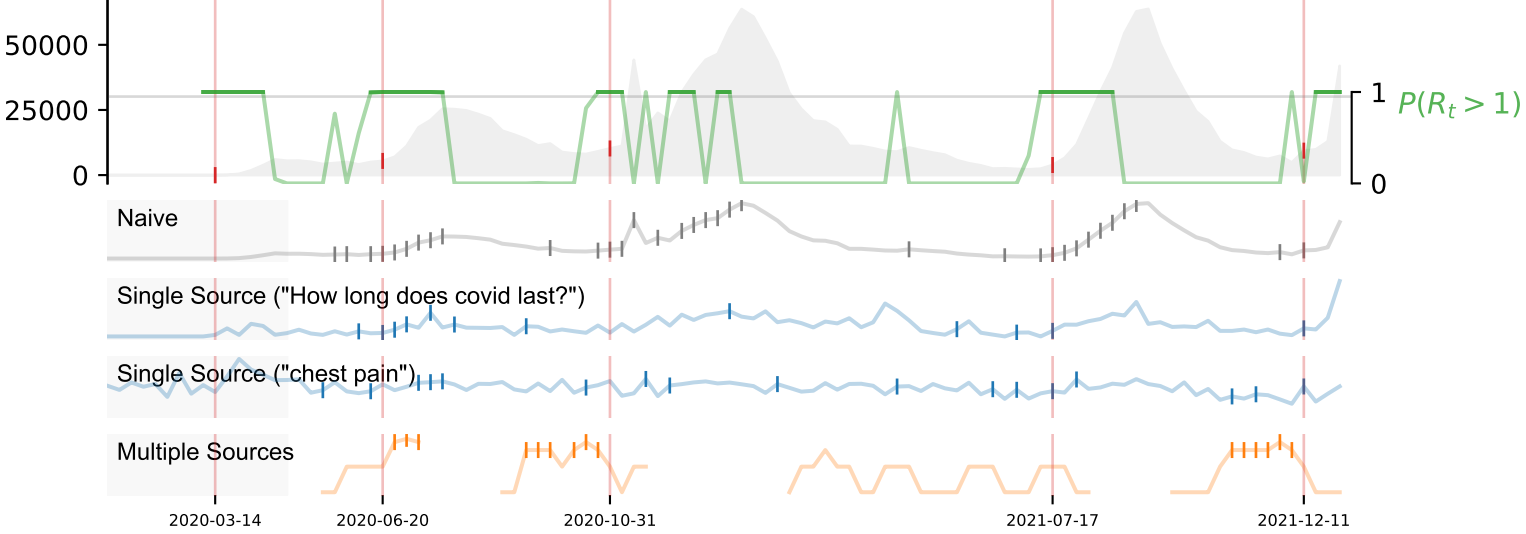

Weekly Confirmed Cases (Hawaii)

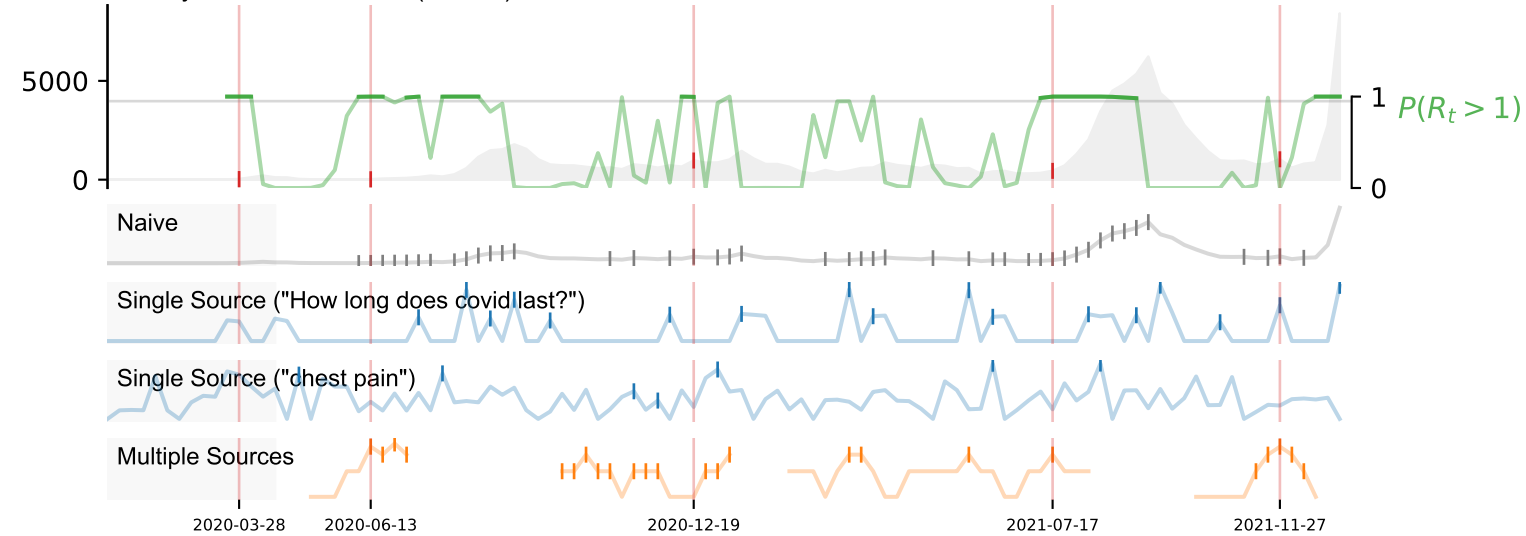

Weekly Confirmed Cases (Idaho)

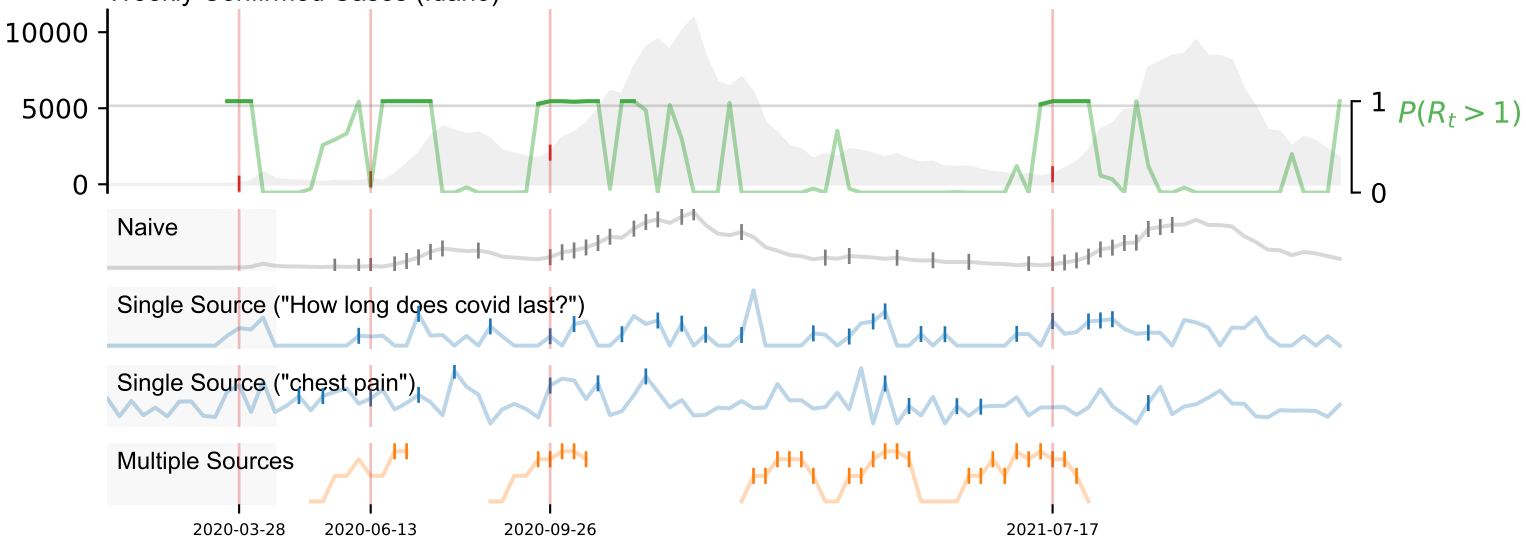

- Naive Method
- Single Source Method
- Multiple Sources Method
- $P(R_t > 1)$
- Gold Standard Event
- Signal Event
- Initial Training Period
- Gold Standard (JHU Cases)

Weekly Confirmed Cases (Illinois)

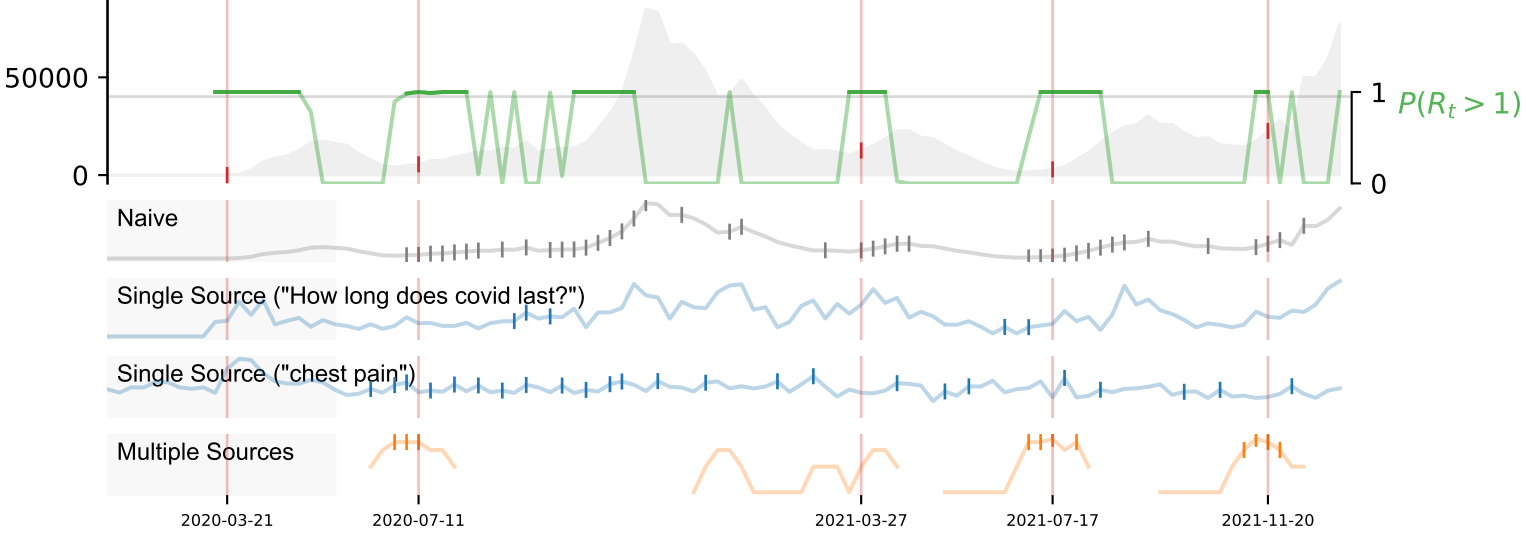

Weekly Confirmed Cases (Indiana)

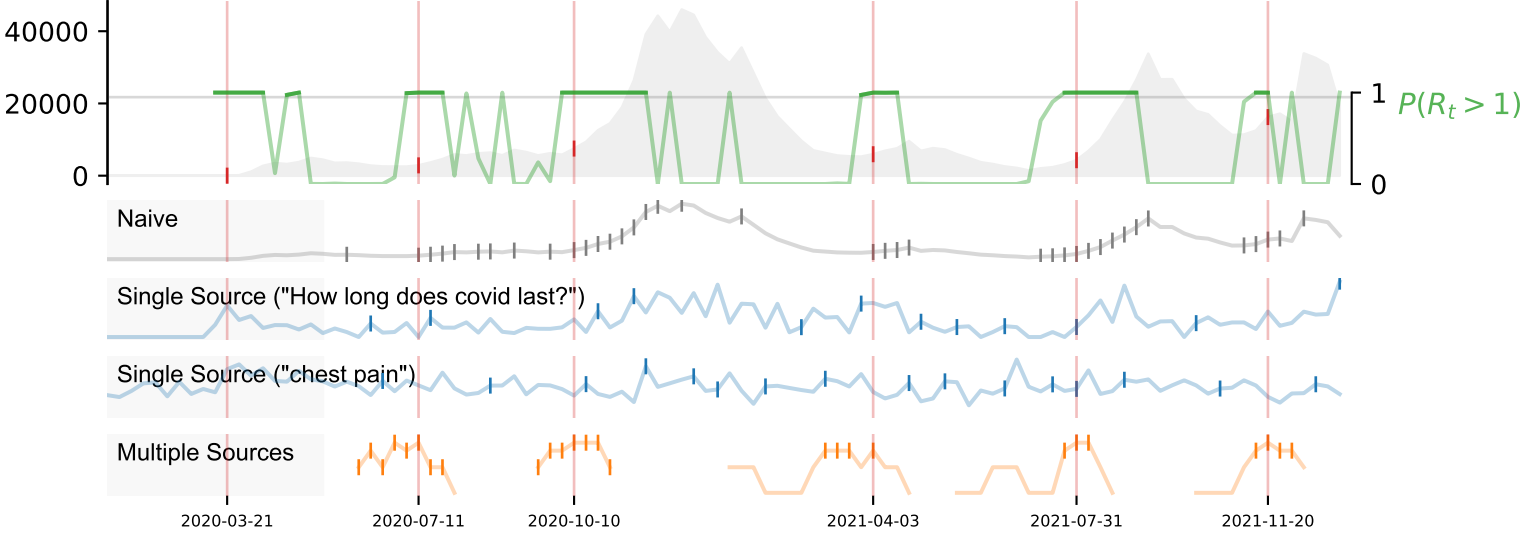

Weekly Confirmed Cases (Iowa)

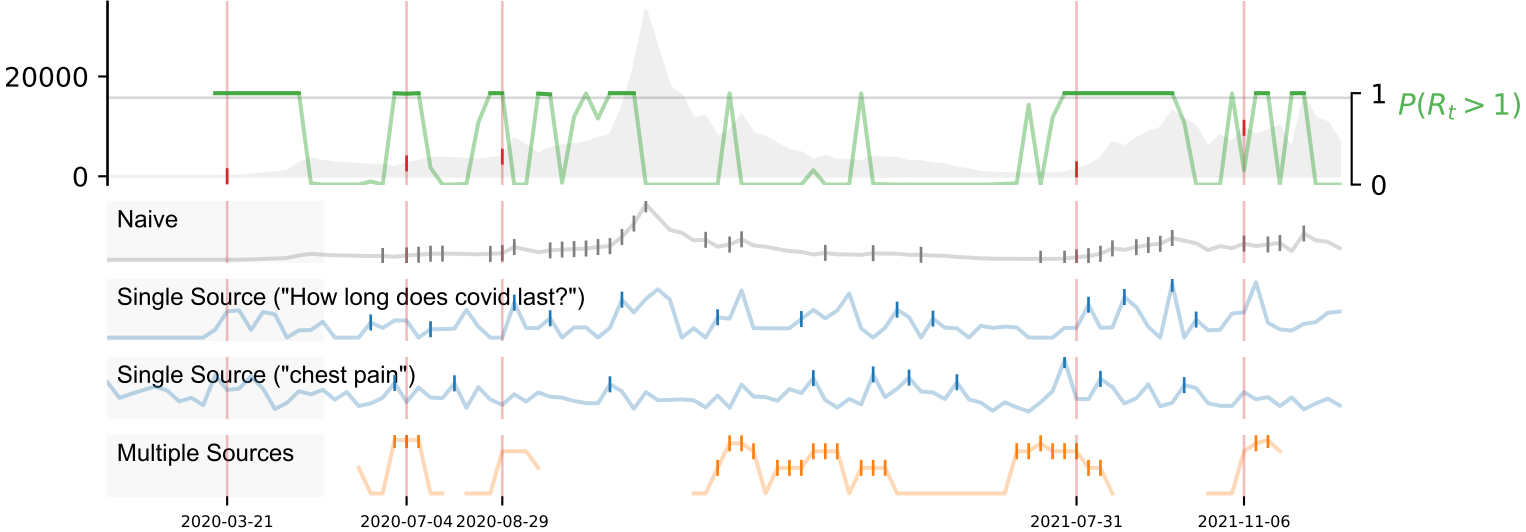

- Naive Method
- Single Source Method
- Multiple Sources Method
- $P(R_t > 1)$
- Gold Standard Event
- Signal Event
- Initial Training Period
- Gold Standard (JHU Cases)

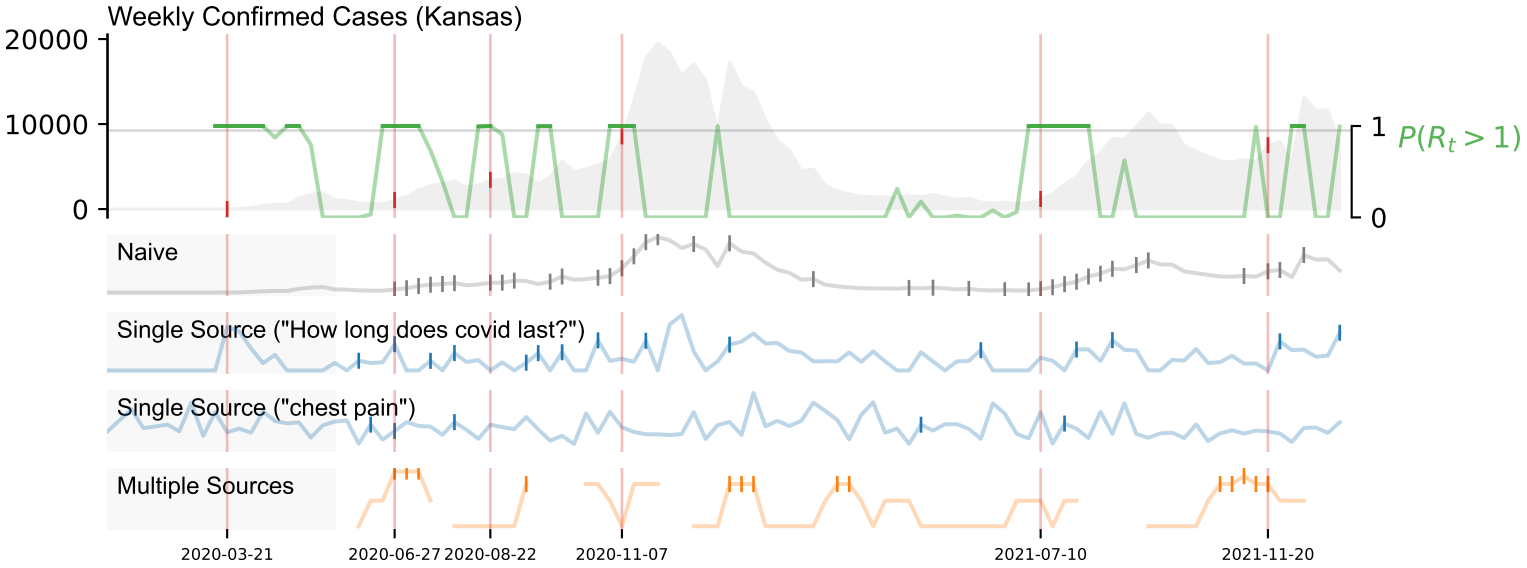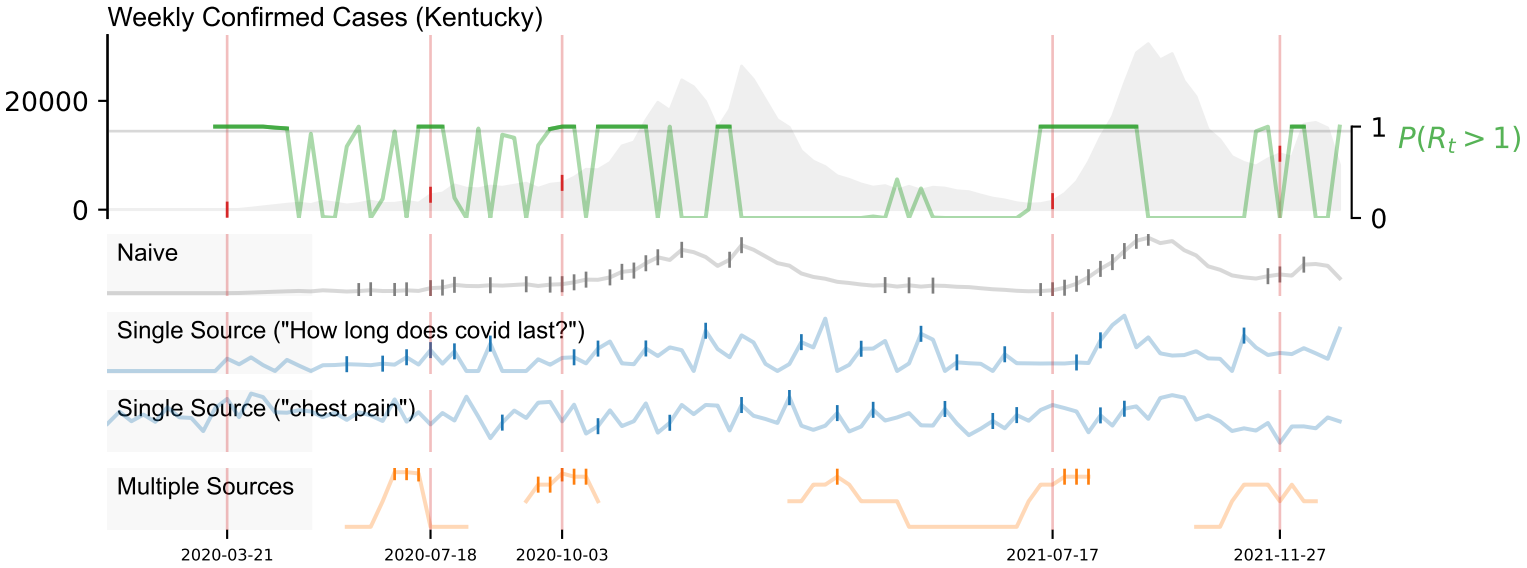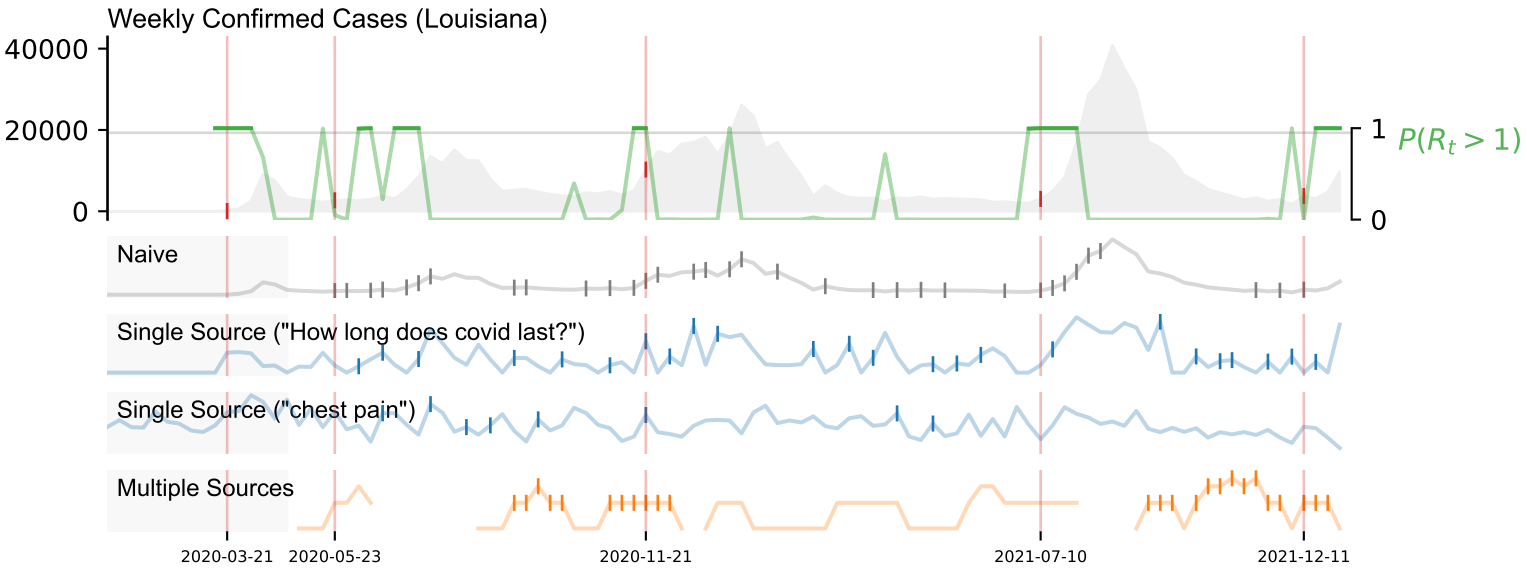

- Naive Method
- Single Source Method
- Multiple Sources Method
- $P(R_t > 1)$
- Gold Standard Event
- Signal Event
- Initial Training Period
- Gold Standard (JHU Cases)

Weekly Confirmed Cases (Maine)

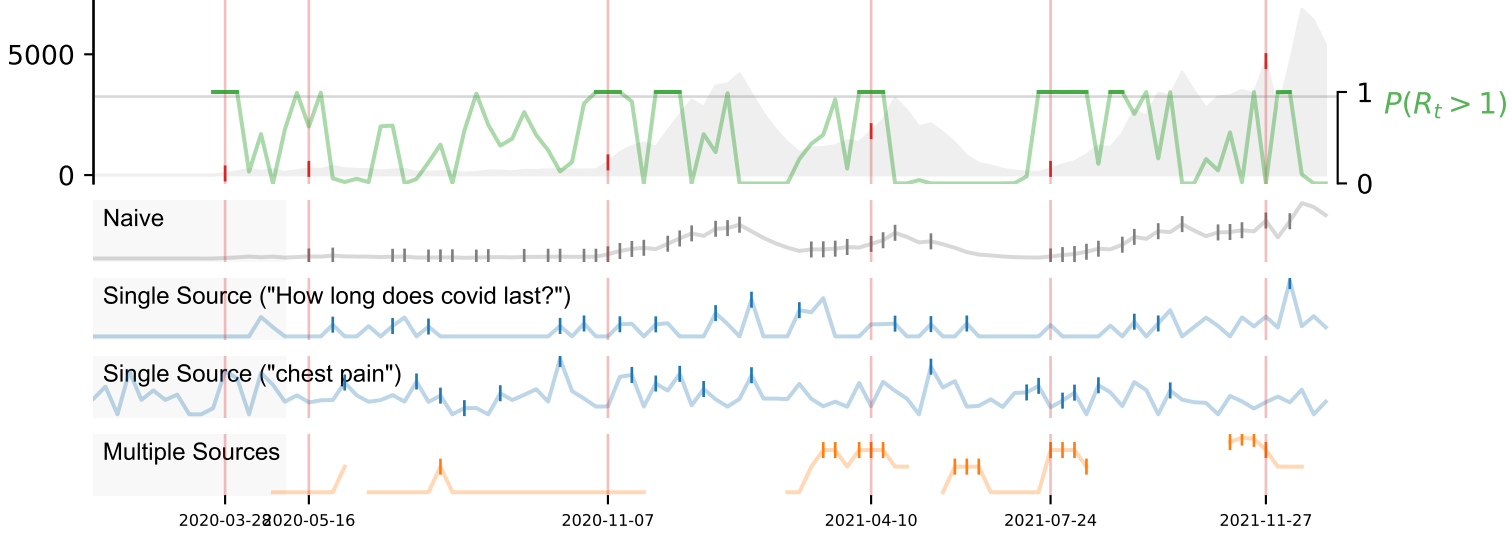

Weekly Confirmed Cases (Maryland)

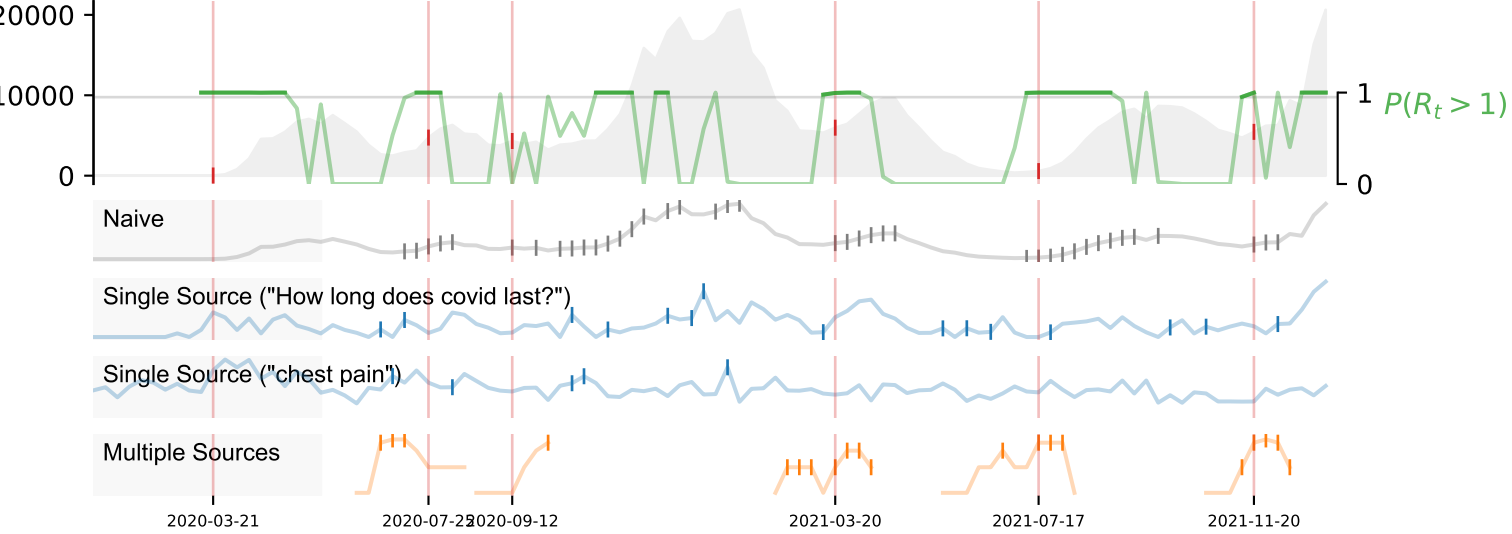

Weekly Confirmed Cases (Massachusetts)

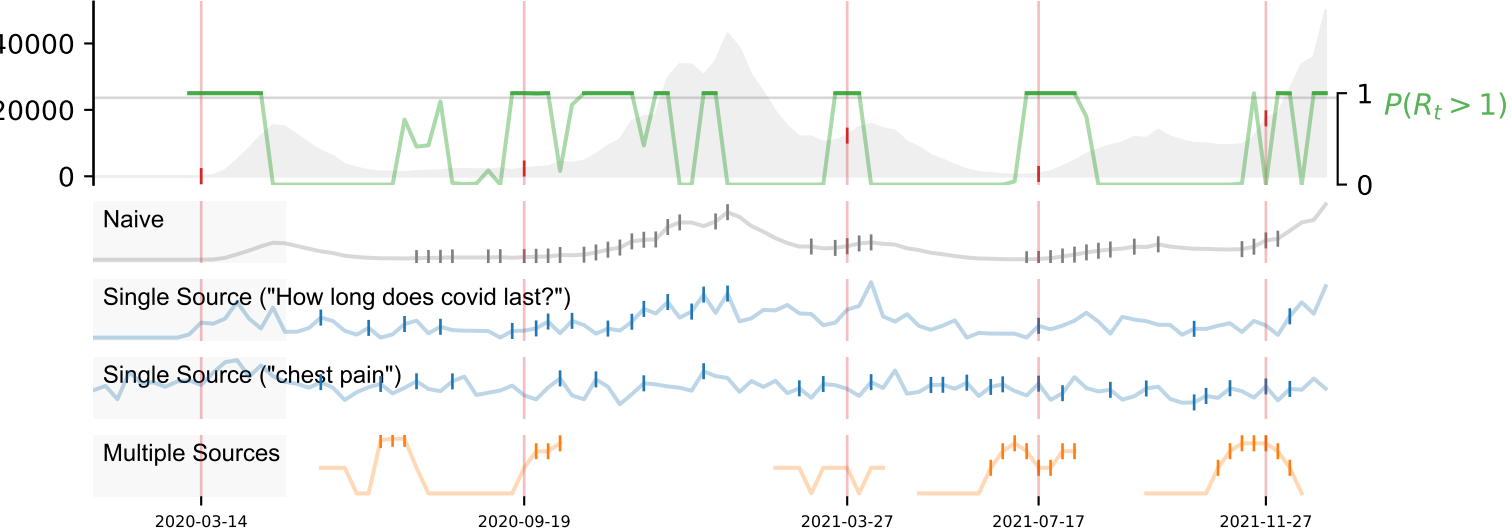

- Naive Method
- Single Source Method
- Multiple Sources Method
- $P(R_t > 1)$
- Gold Standard Event
- Signal Event
- Initial Training Period
- Gold Standard (JHU Cases)

Weekly Confirmed Cases (Michigan)

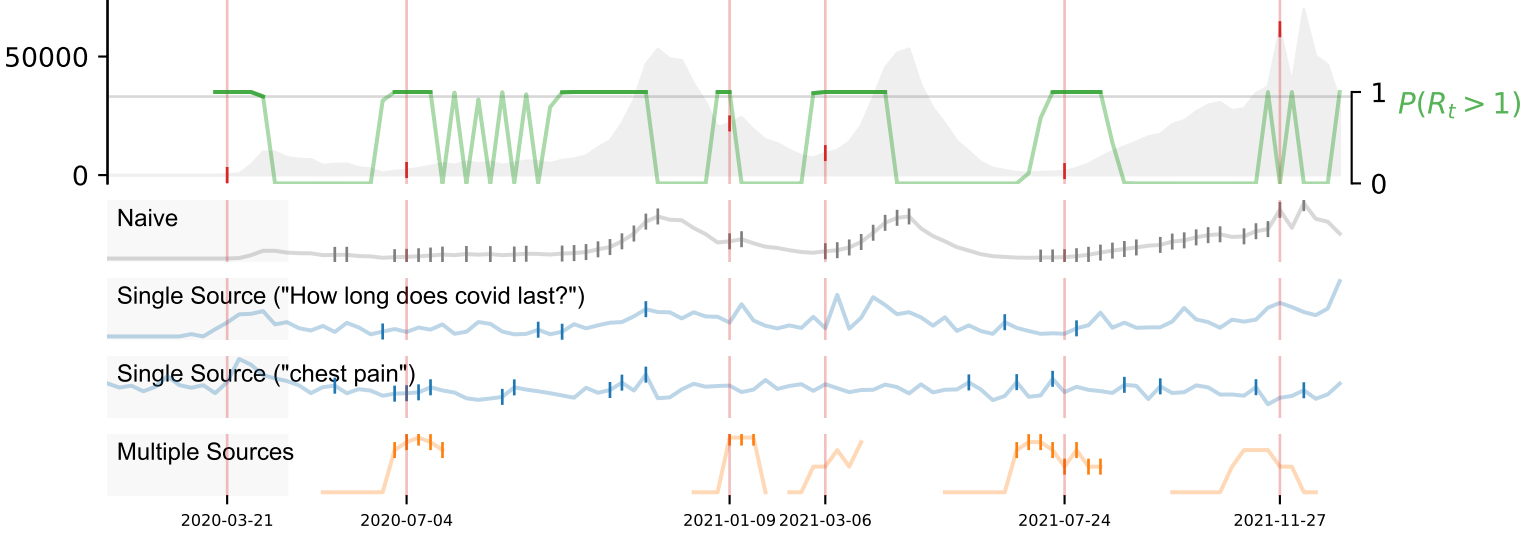

Weekly Confirmed Cases (Minnesota)

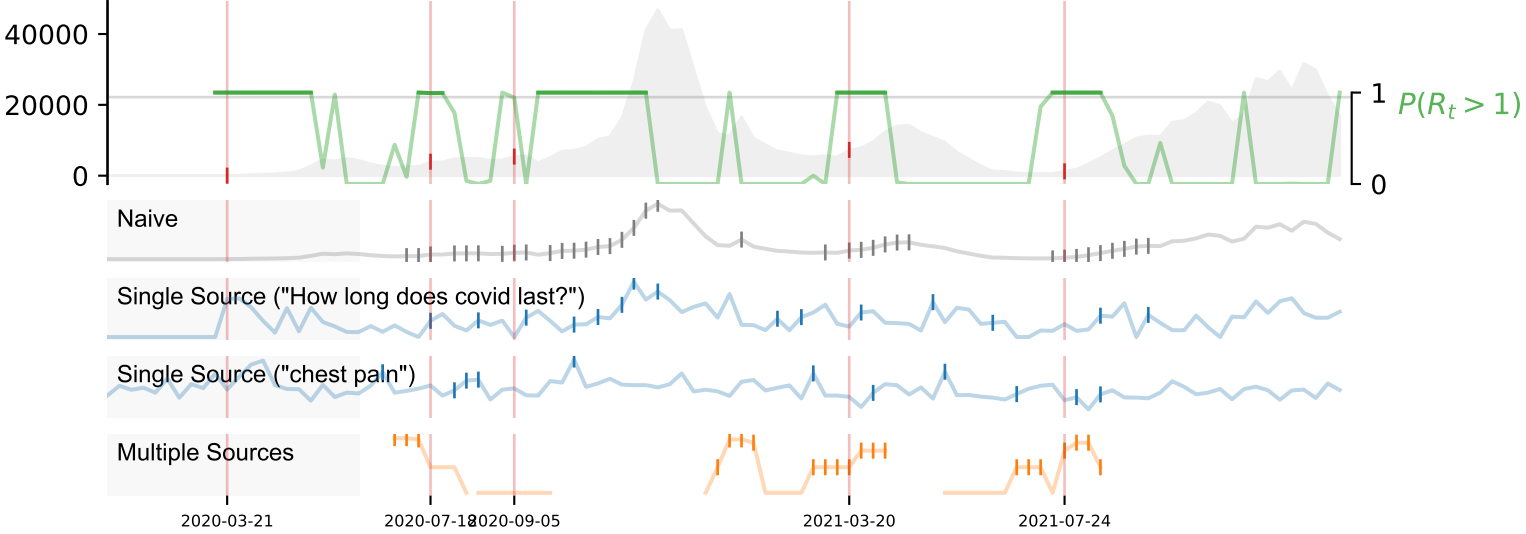

Weekly Confirmed Cases (Mississippi)

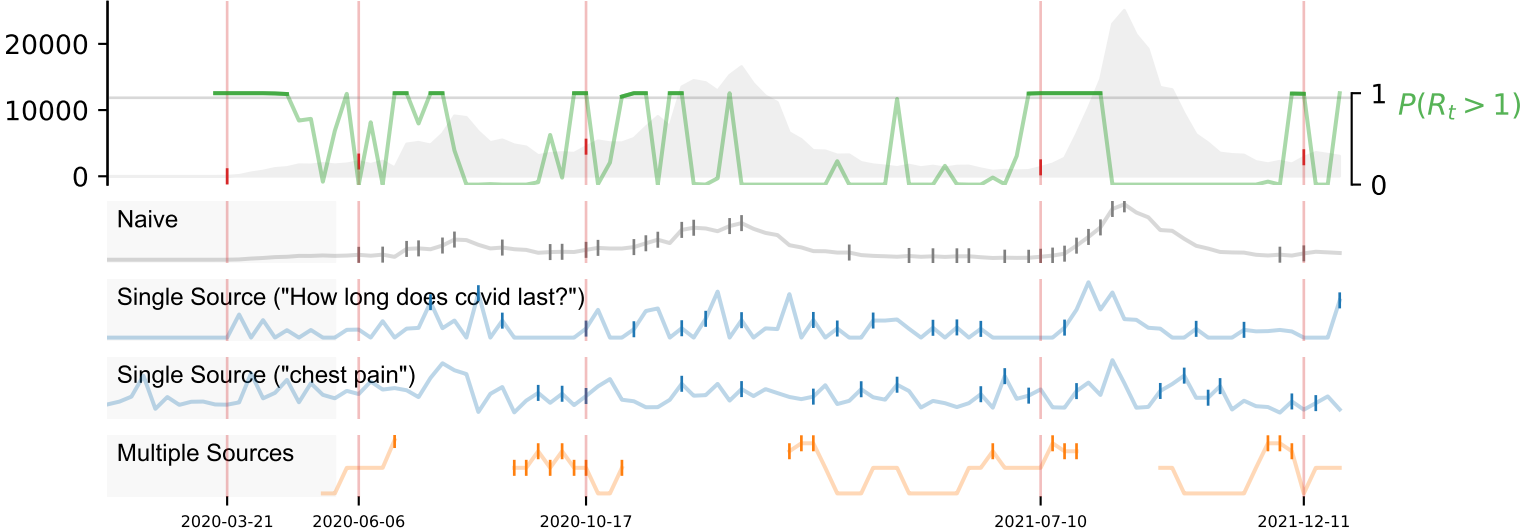

- Naive Method
- Single Source Method
- Multiple Sources Method
- $P(R_t > 1)$
- Gold Standard Event
- Signal Event
- Initial Training Period
- Gold Standard (JHU Cases)

### Weekly Confirmed Cases (Missouri)

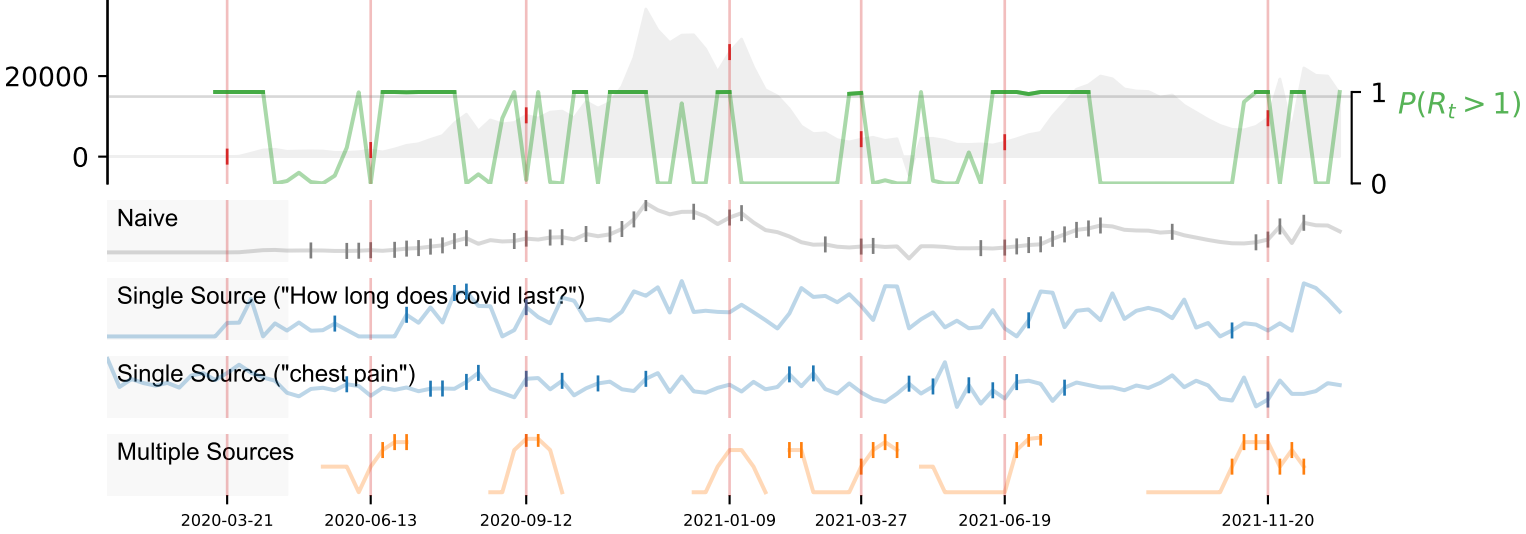

### Weekly Confirmed Cases (Montana)

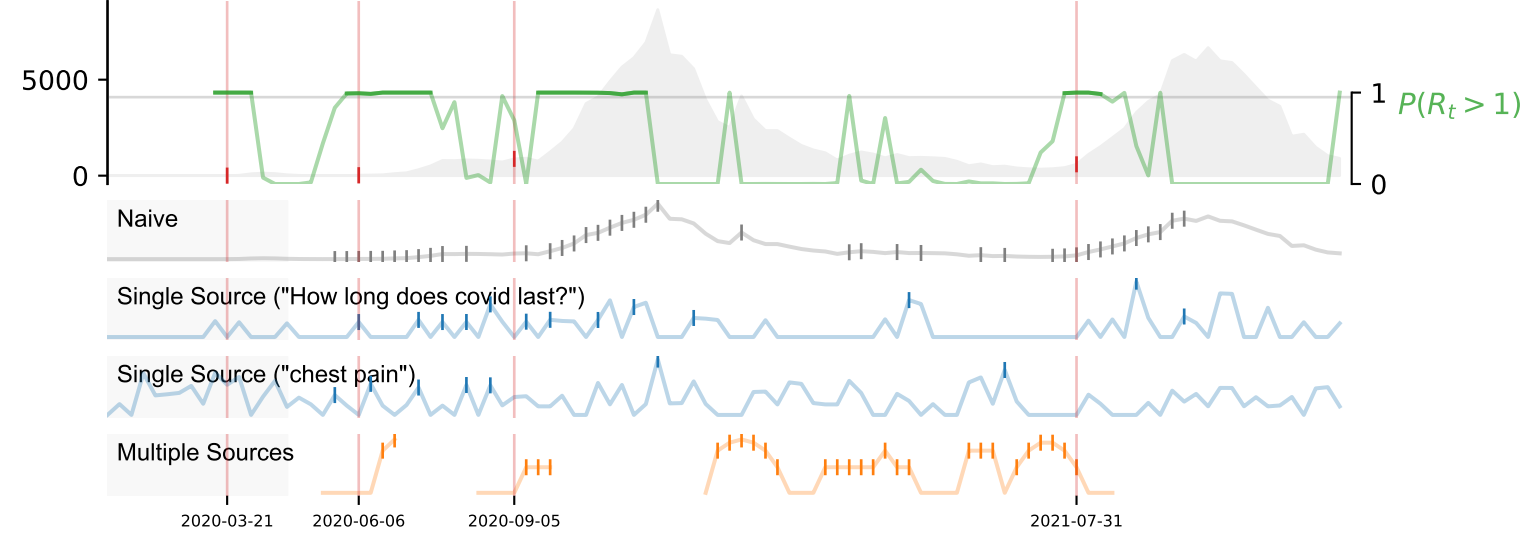

### Weekly Confirmed Cases (Nebraska)

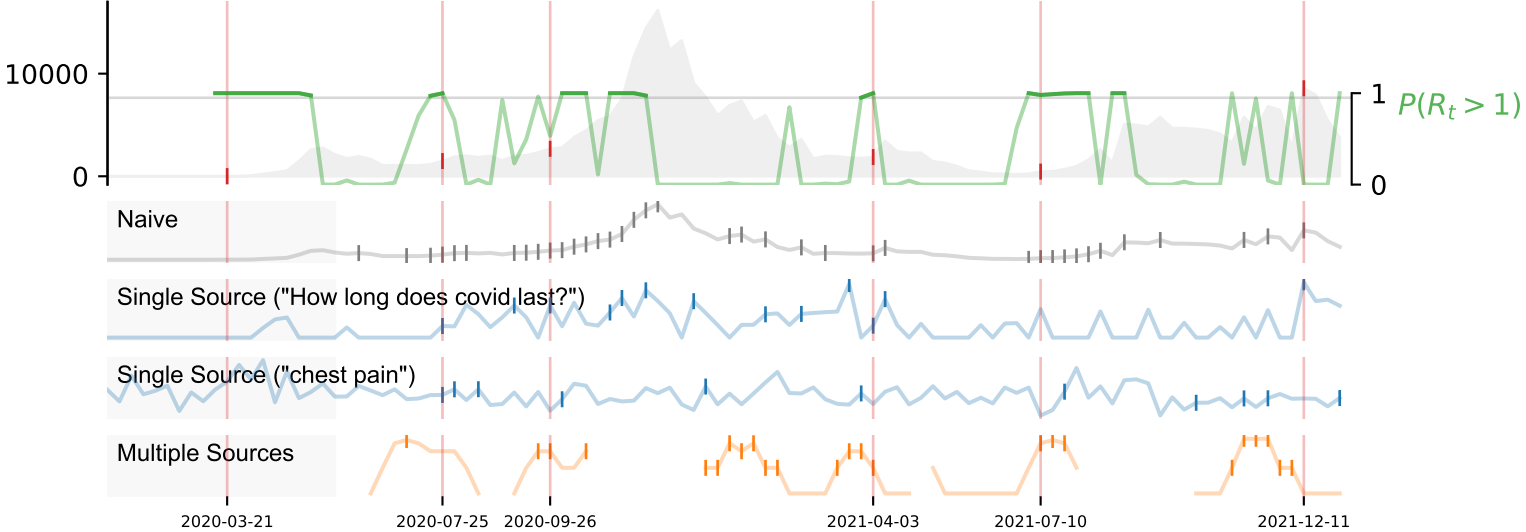



- Naive Method
- Single Source Method
- Multiple Sources Method
- $P(R_t > 1)$
- Gold Standard Event
- Signal Event
- Initial Training Period
- Gold Standard (JHU Cases)

Weekly Confirmed Cases (Nevada)

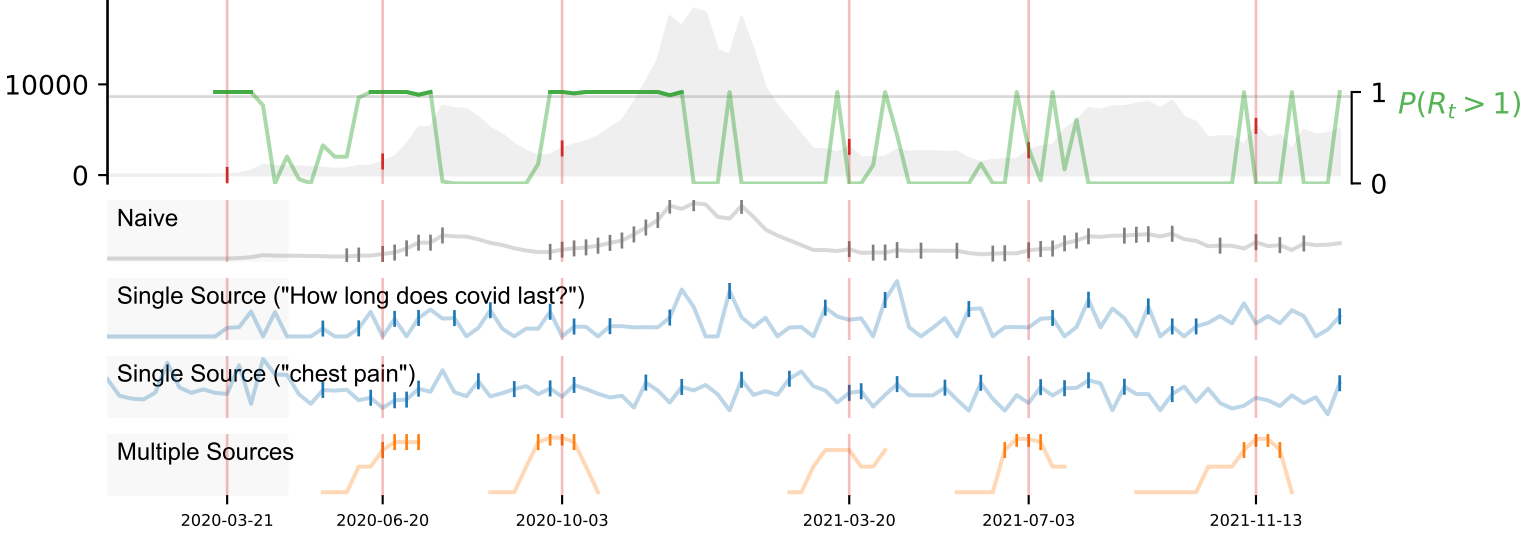

Weekly Confirmed Cases (New Hampshire)

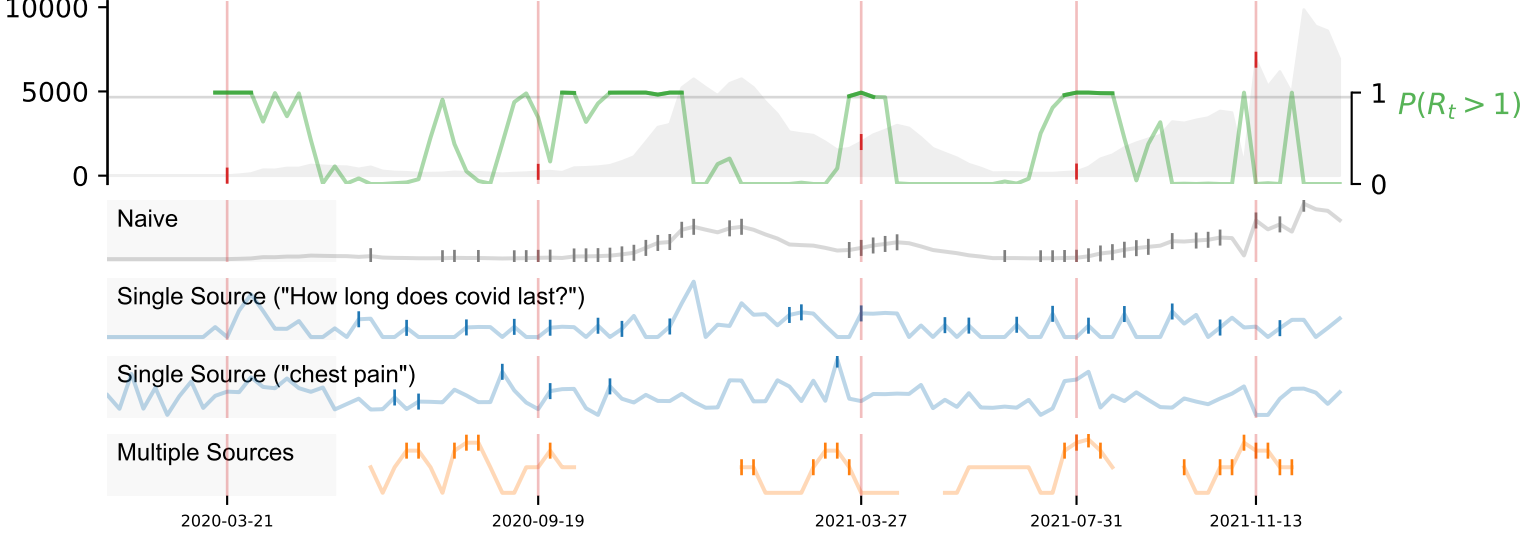

Weekly Confirmed Cases (New Jersey)

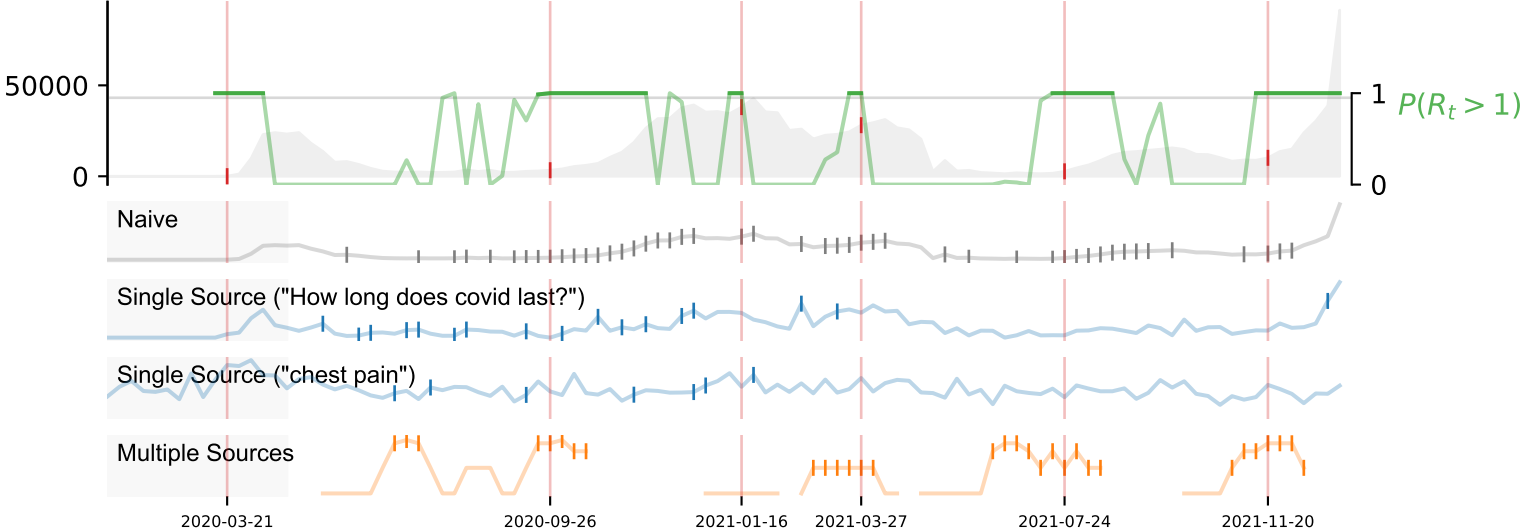

- Naive Method
- Single Source Method
- Multiple Sources Method
- $P(R_t > 1)$
- Gold Standard Event
- Signal Event
- Initial Training Period
- Gold Standard (JHU Cases)

Weekly Confirmed Cases (New Mexico)

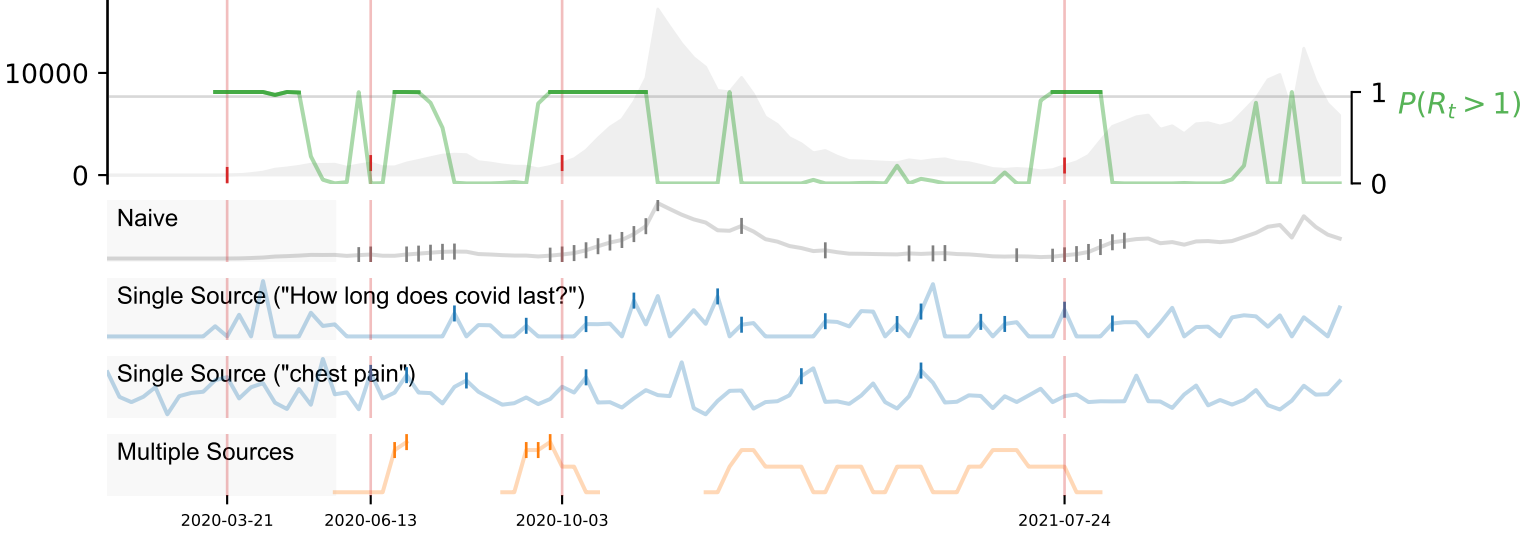

Weekly Confirmed Cases (New York)

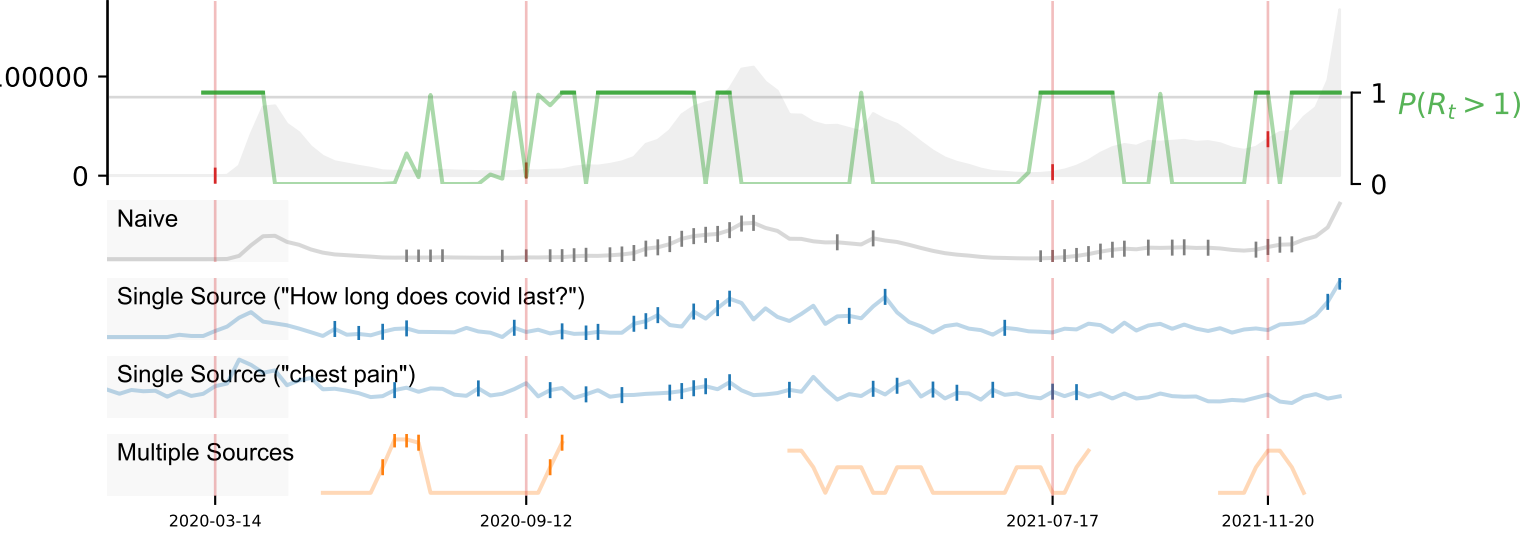

Weekly Confirmed Cases (North Carolina)

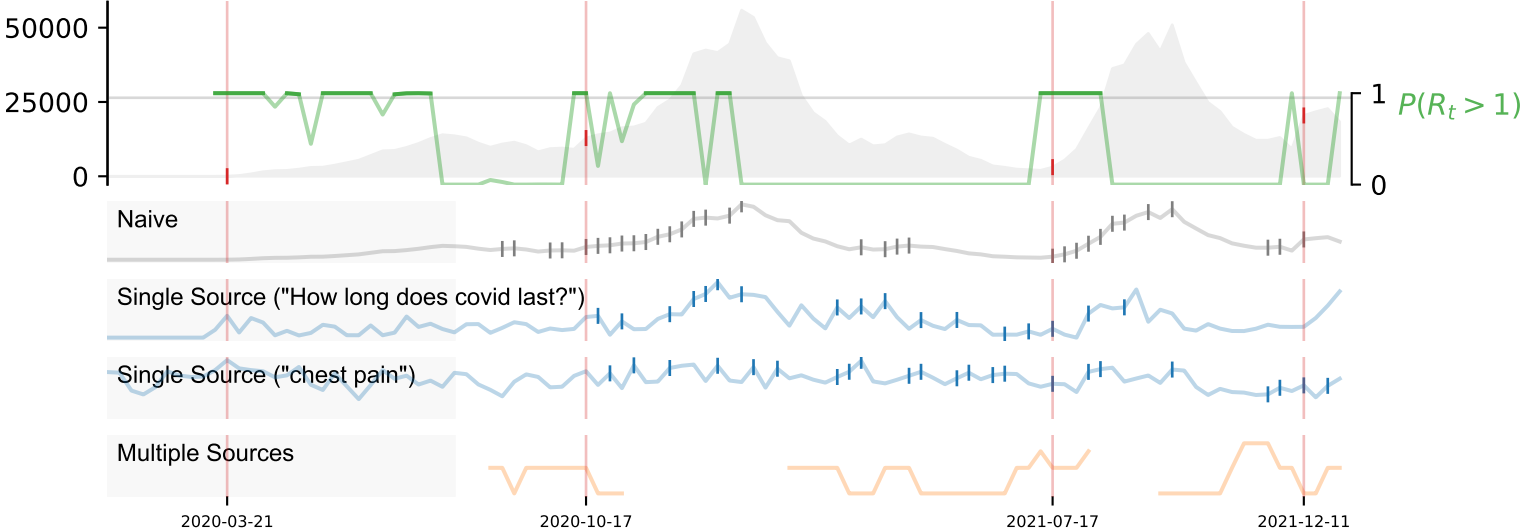

- Naive Method
- Single Source Method
- Multiple Sources Method
- $P(R_t > 1)$
- Gold Standard Event
- Signal Event
- Initial Training Period
- Gold Standard (JHU Cases)

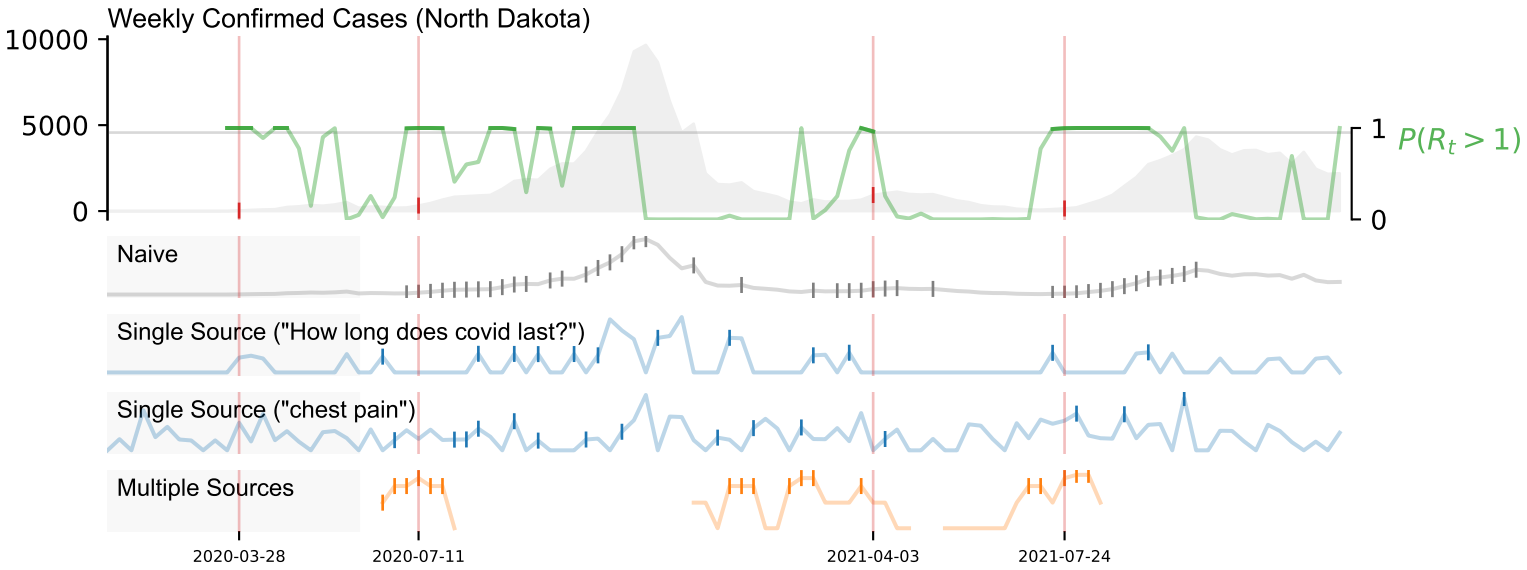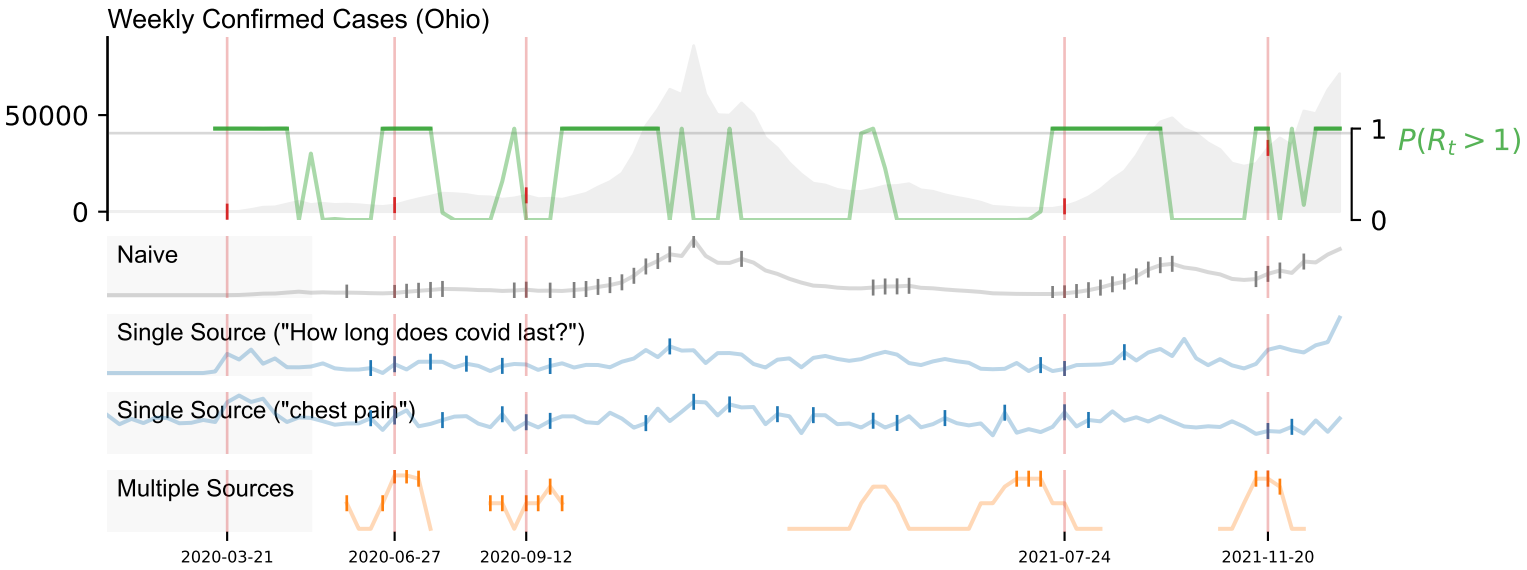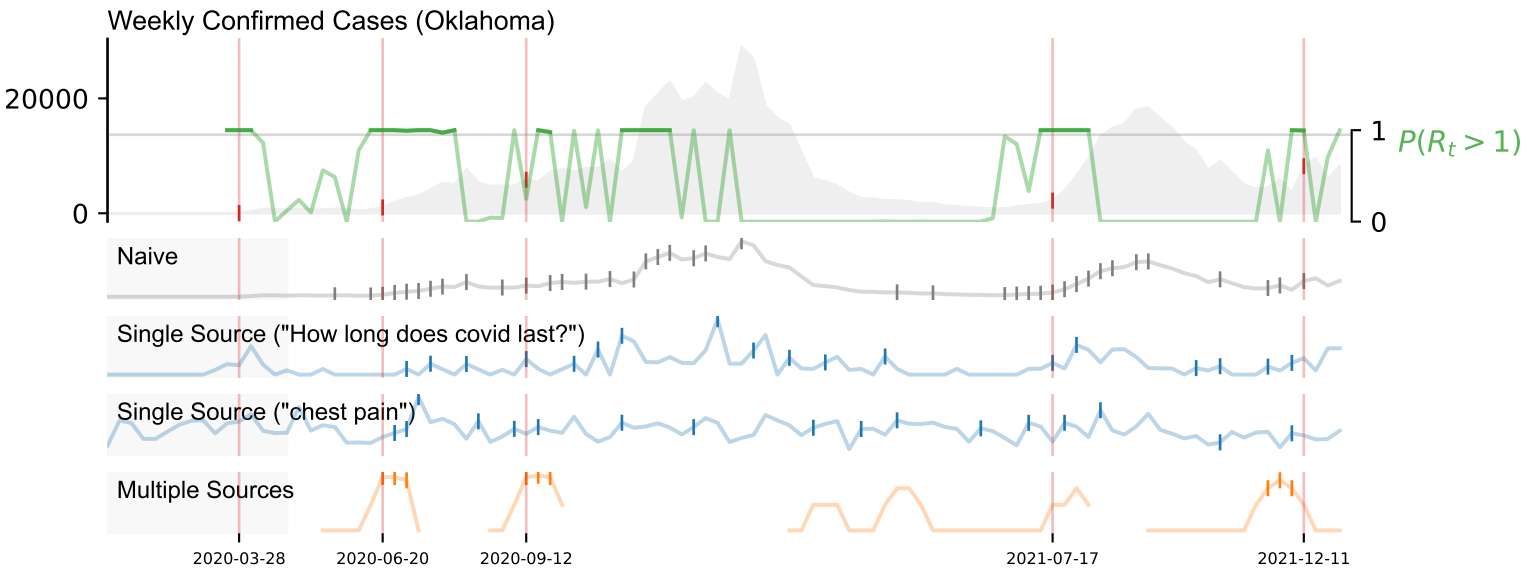

- Naive Method
- Single Source Method
- Multiple Sources Method
- $P(R_t > 1)$
- Gold Standard Event
- Signal Event
- Initial Training Period
- Gold Standard (JHU Cases)

Weekly Confirmed Cases (Oregon)

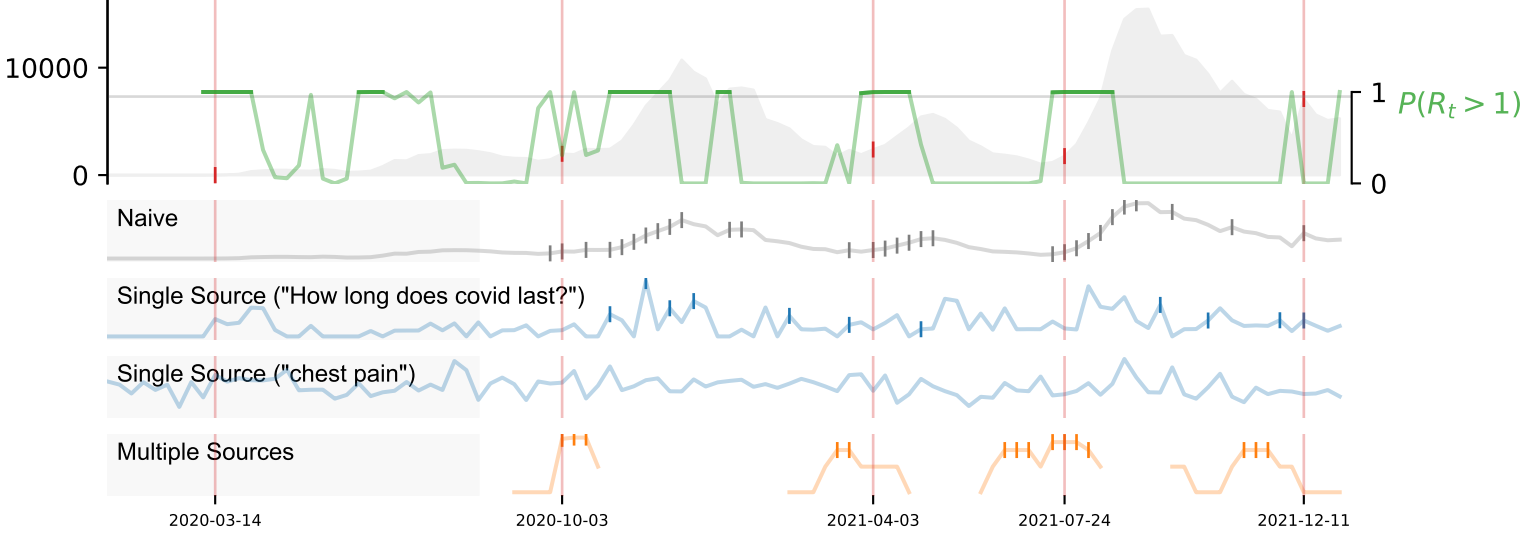

Weekly Confirmed Cases (Pennsylvania)

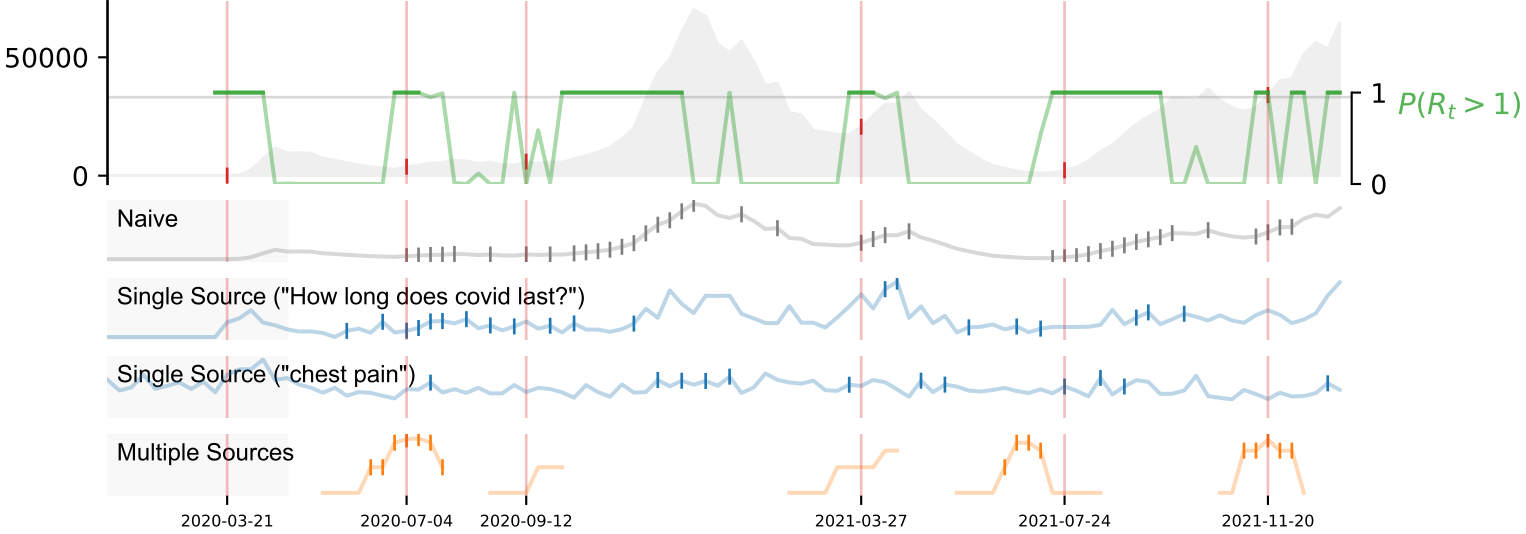

Weekly Confirmed Cases (Rhode Island)

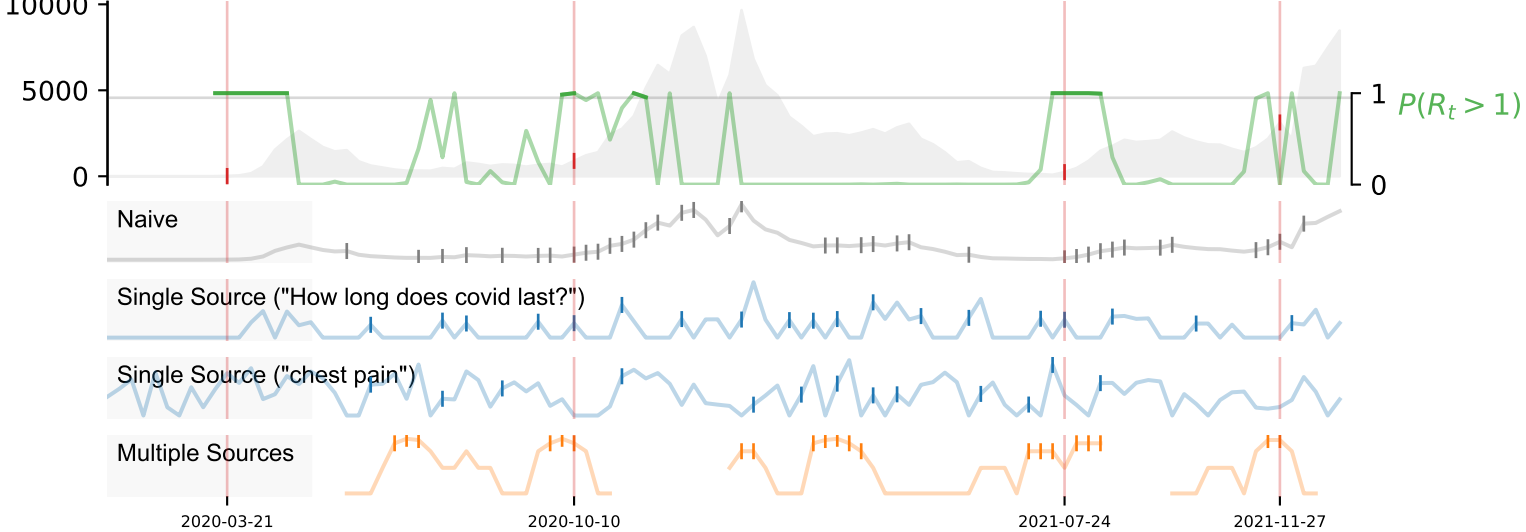

- Naive Method
- Single Source Method
- Multiple Sources Method
- $P(R_t > 1)$
- Gold Standard Event
- Signal Event
- Initial Training Period
- Gold Standard (JHU Cases)

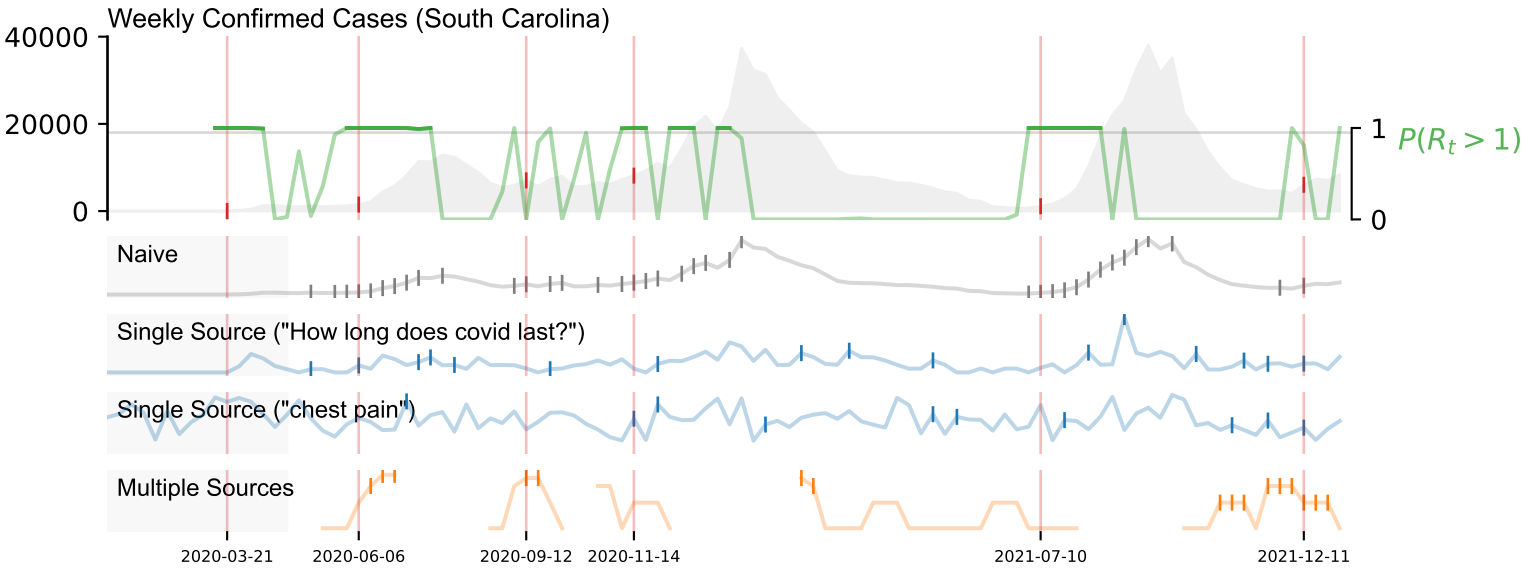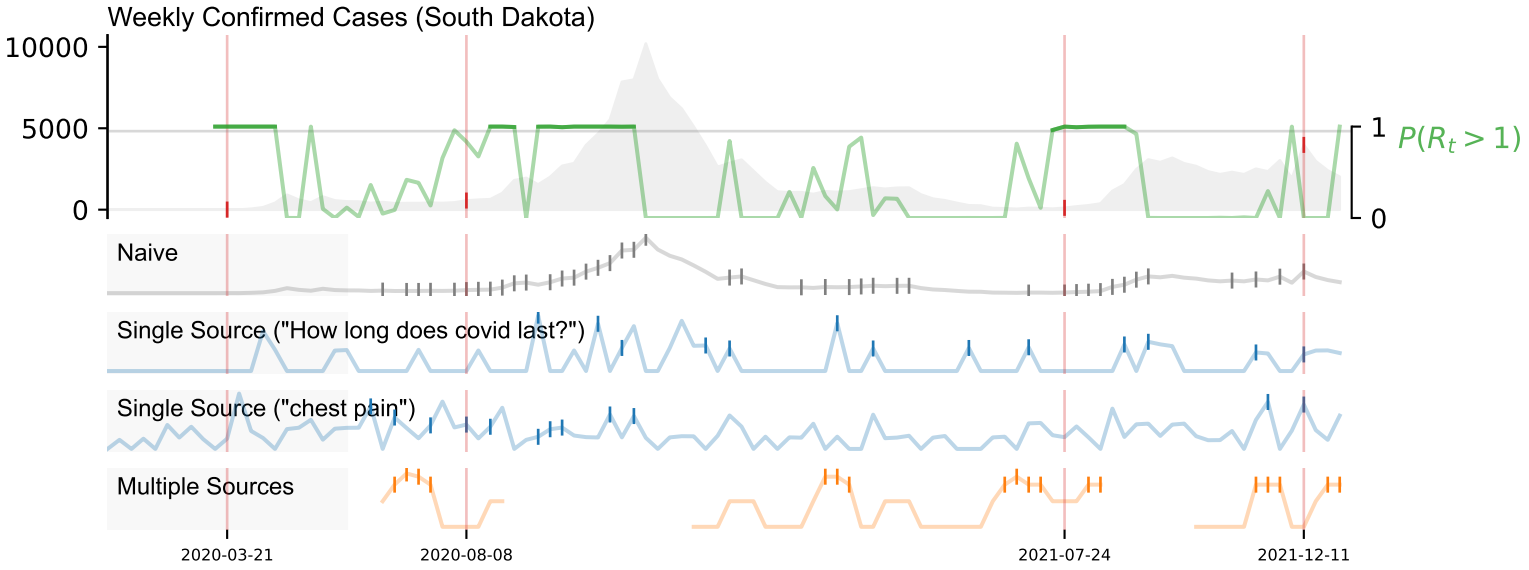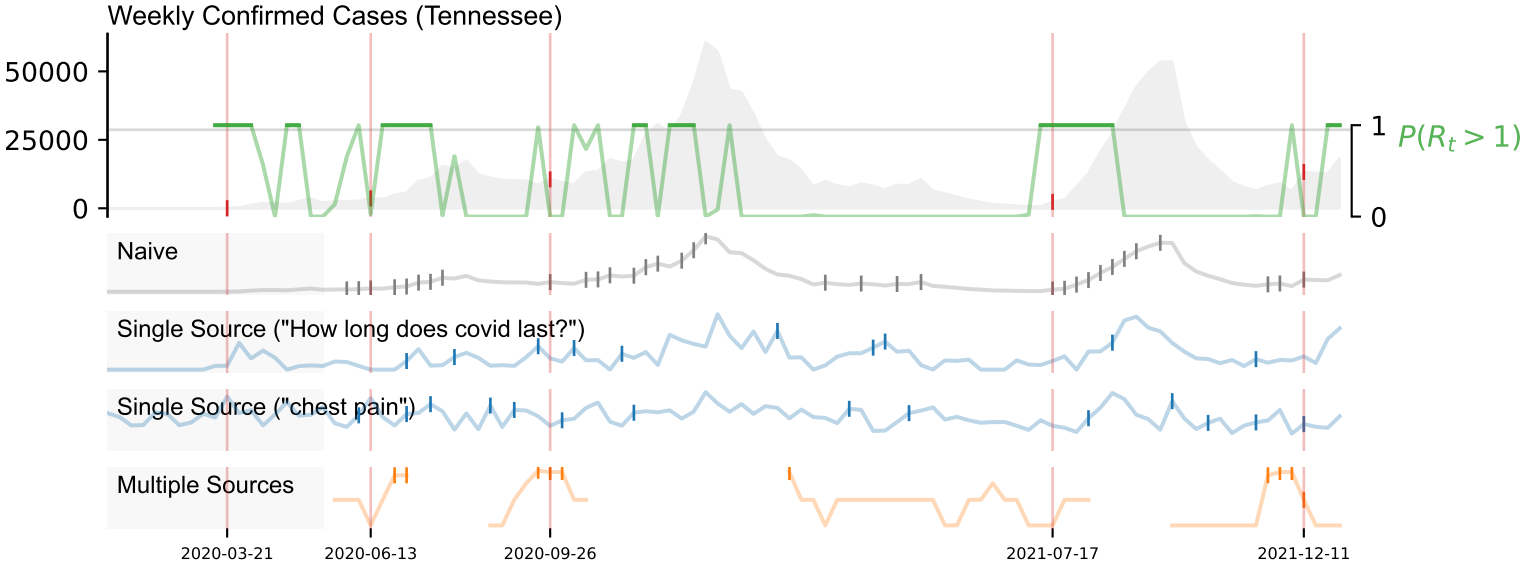

- Naive Method
- Single Source Method
- Multiple Sources Method
- $P(R_t > 1)$
- Gold Standard Event
- Signal Event
- Initial Training Period
- Gold Standard (JHU Cases)

Weekly Confirmed Cases (Texas)

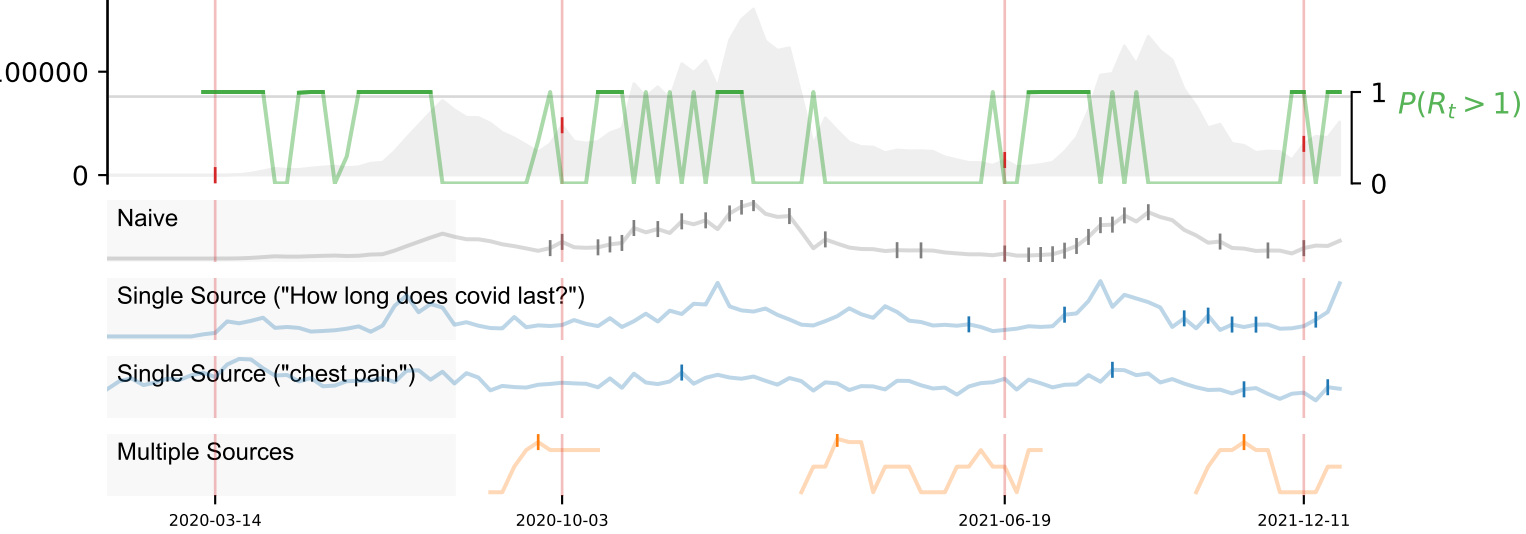

Weekly Confirmed Cases (Utah)

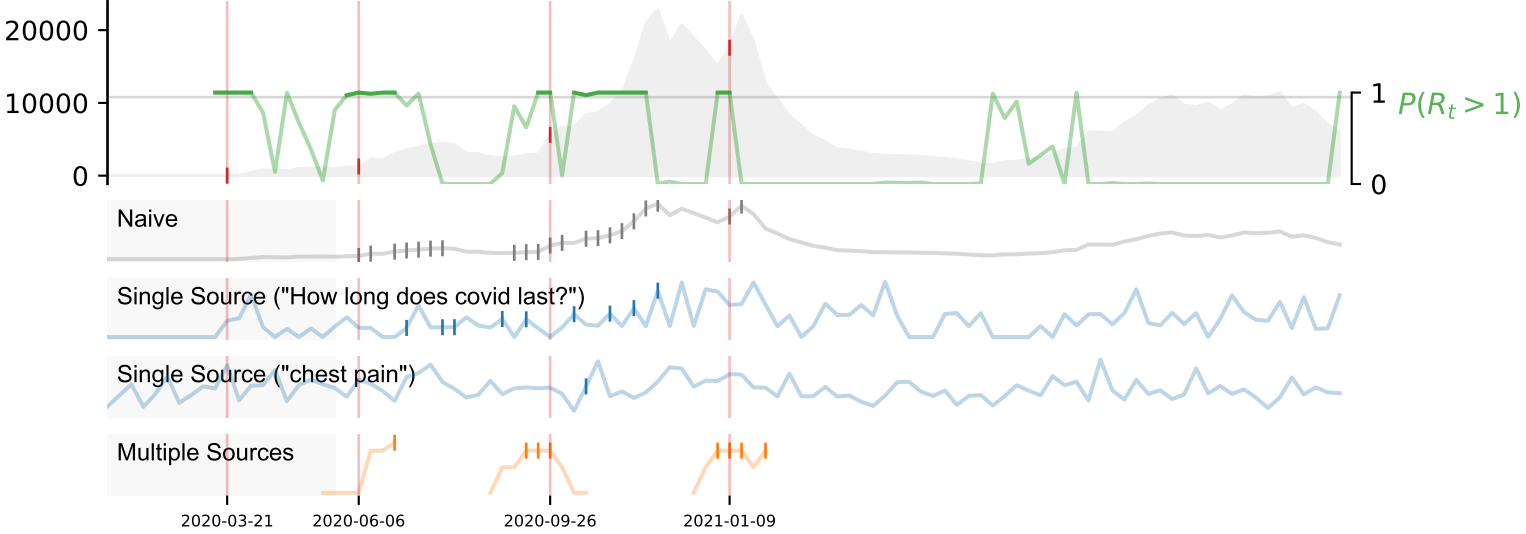

Weekly Confirmed Cases (Vermont)

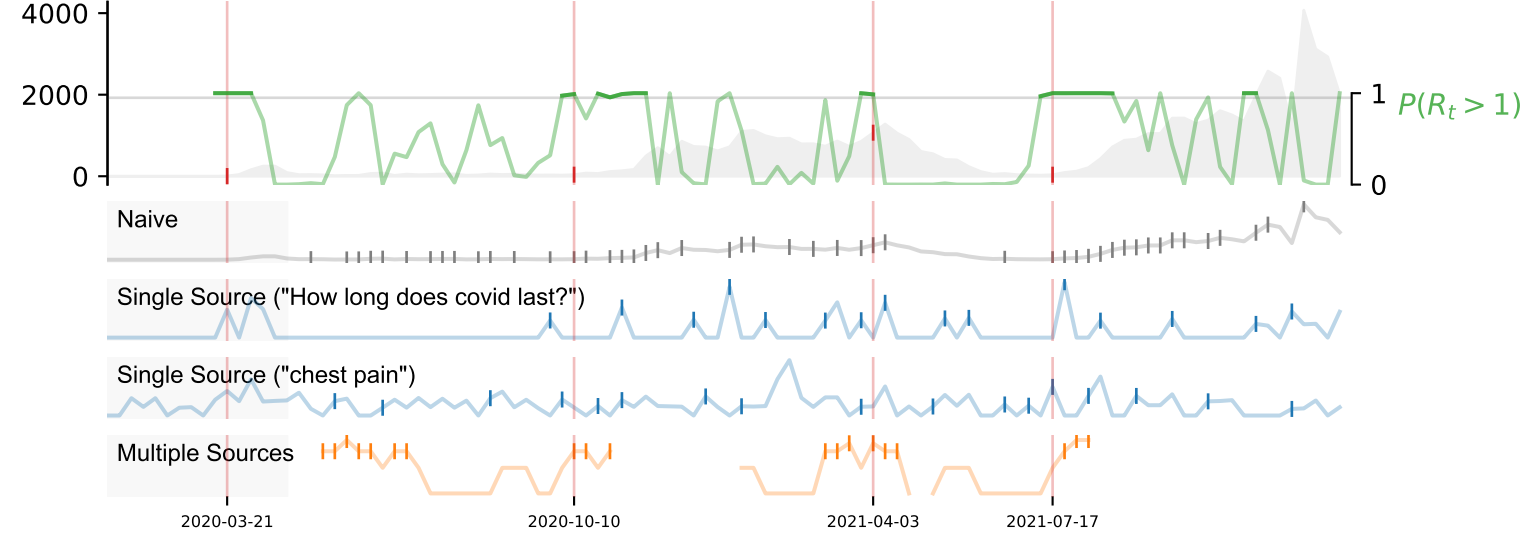

- Naive Method
- Single Source Method
- Multiple Sources Method
- $P(R_t > 1)$
- Gold Standard Event
- Signal Event
- Initial Training Period
- Gold Standard (JHU Cases)

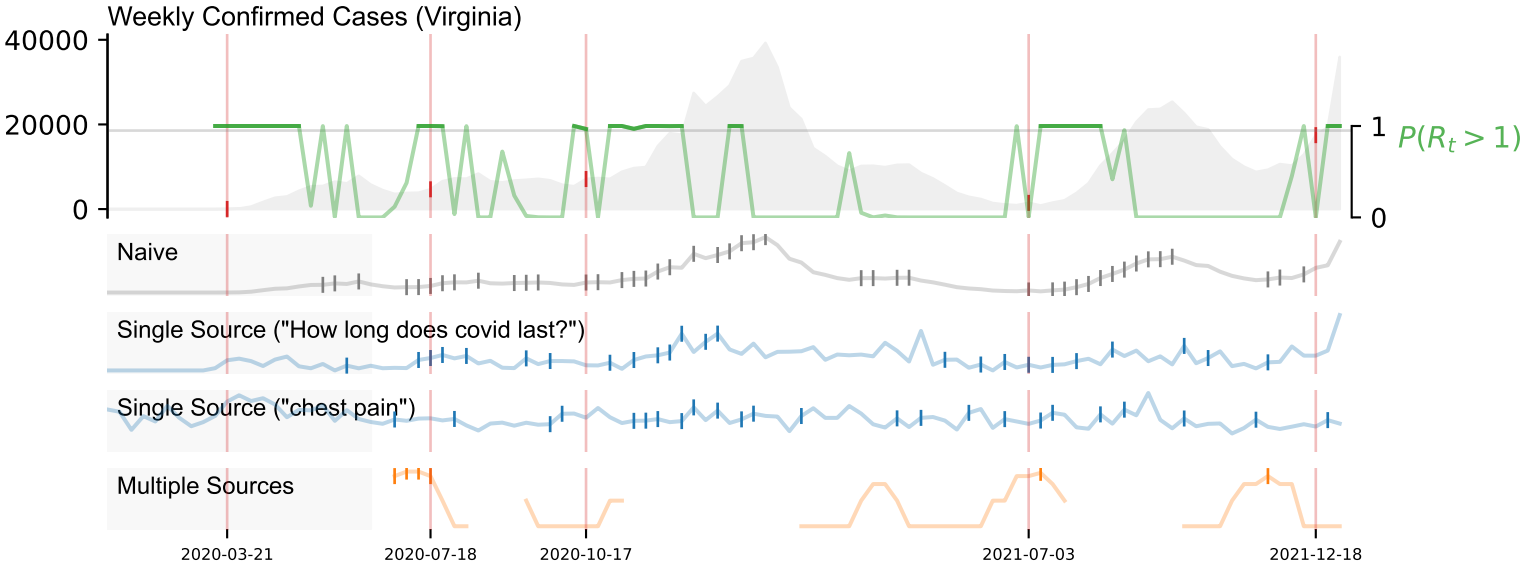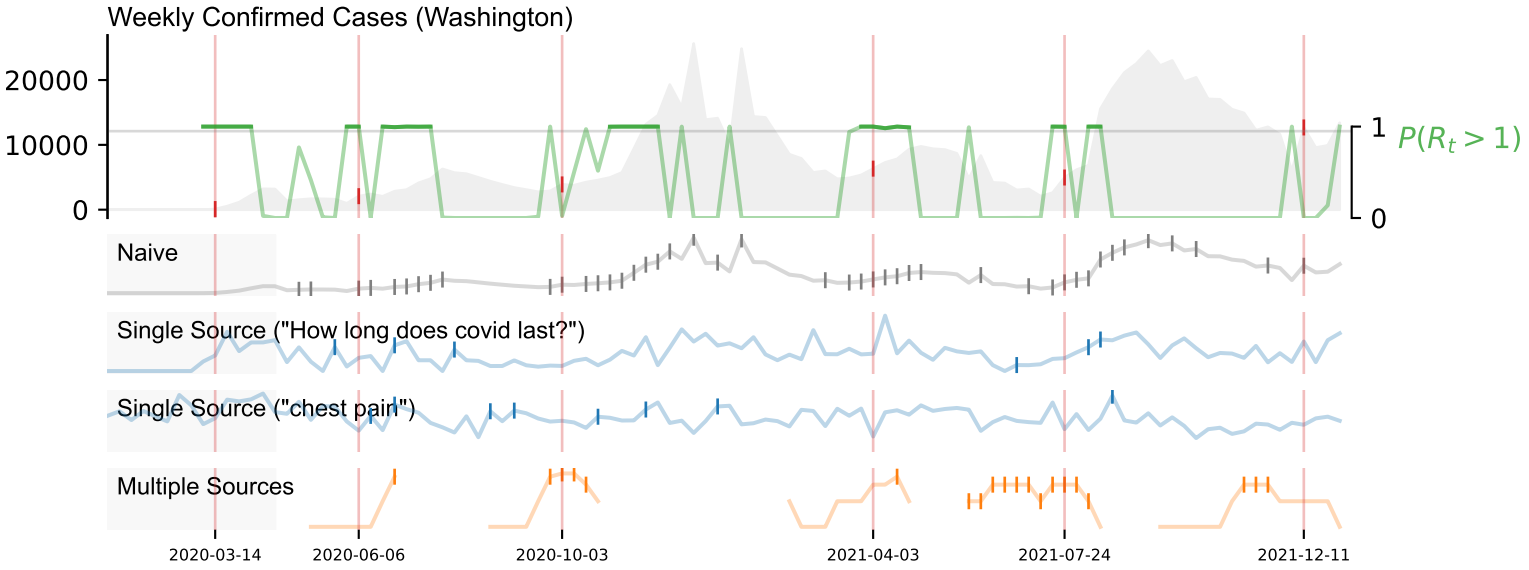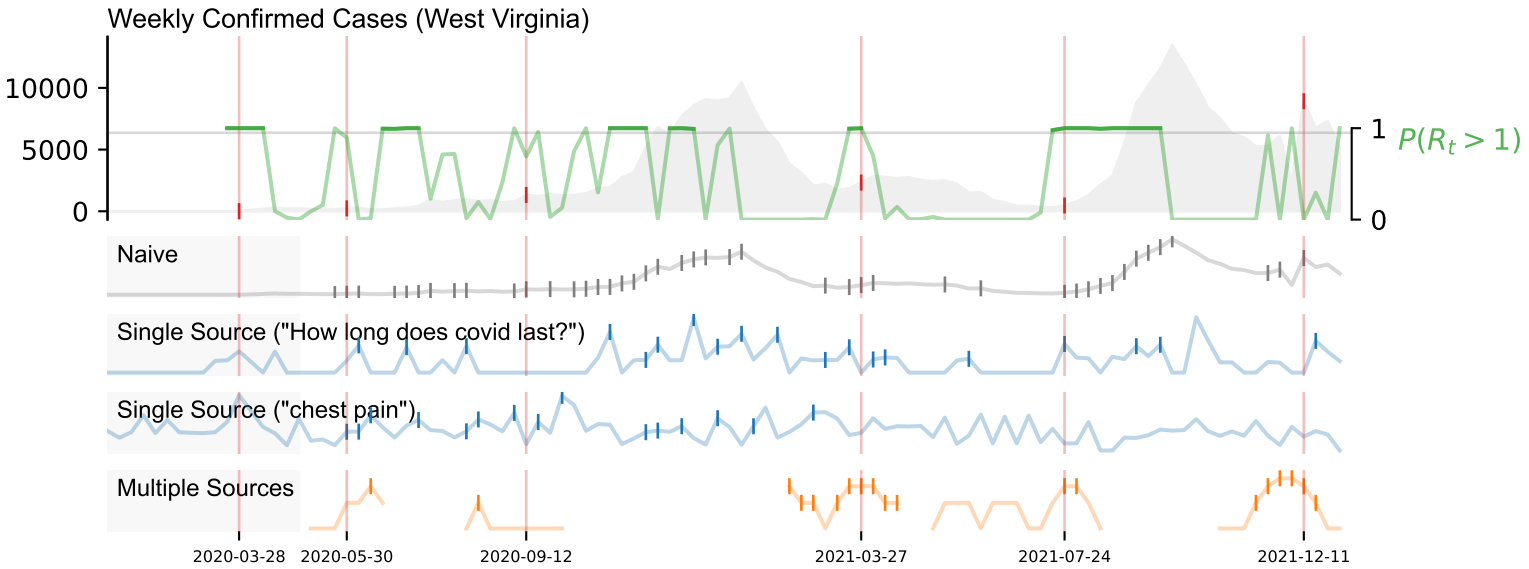

Figures S50-S139.

Visualization of the multiple sources model as a function of time. The model's output (orange) is compared against the onsets (vertical gray tick marks) of the COVID-19 reported cases (gray-filled curve). As more information becomes available, the EWS model is re-trained to select the proxies that best fit the training data available (represented by the blue shading on each Figure). A list of the selected proxies for each model, along with a performance table are also presented.



## Proxies selected by the Multiple Sources method

Model 1

- (GT) covid
- (GT) covid-19
- (GT) covid symptoms
- (GT) quarantine
- (GT) Acute bronchitis
- (GT) Bronchitis

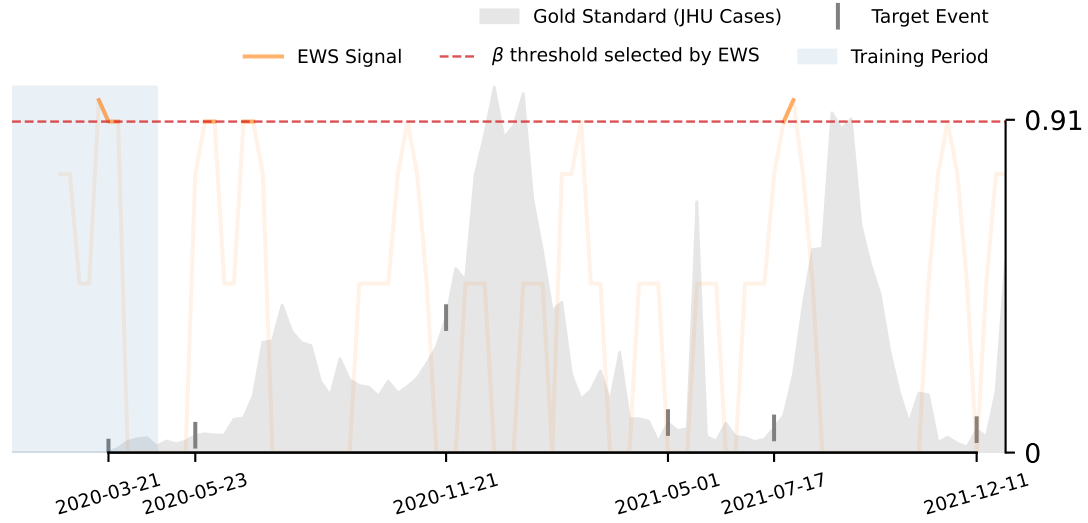

Model 2

- (GT) covid
- (GT) covid-19
- (GT) Abdominal pain
- (GT) Asphyxia
- (GT) Dizziness
- (GT) Vertigo

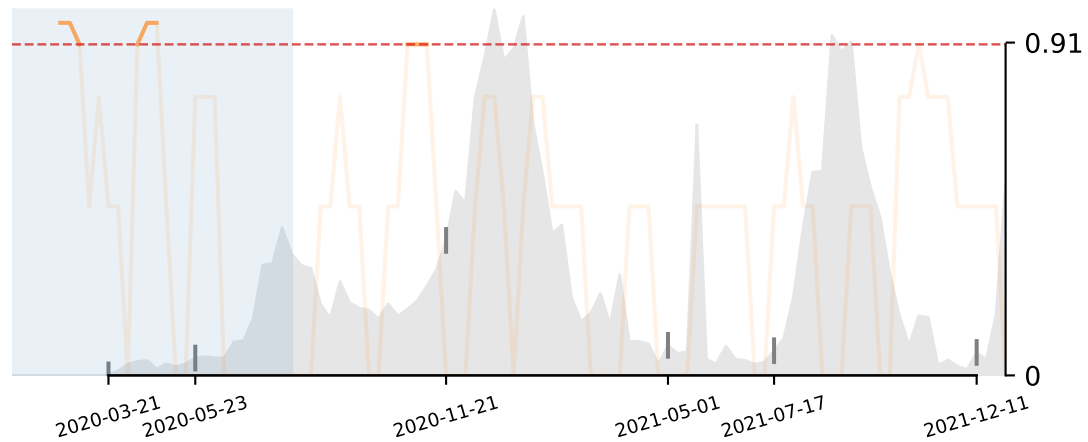

Model 3

- (GT) covid
- (GT) covid-19
- (GT) Abdominal pain
- (GT) Asphyxia
- (GT) fever
- (GT) covid symptoms

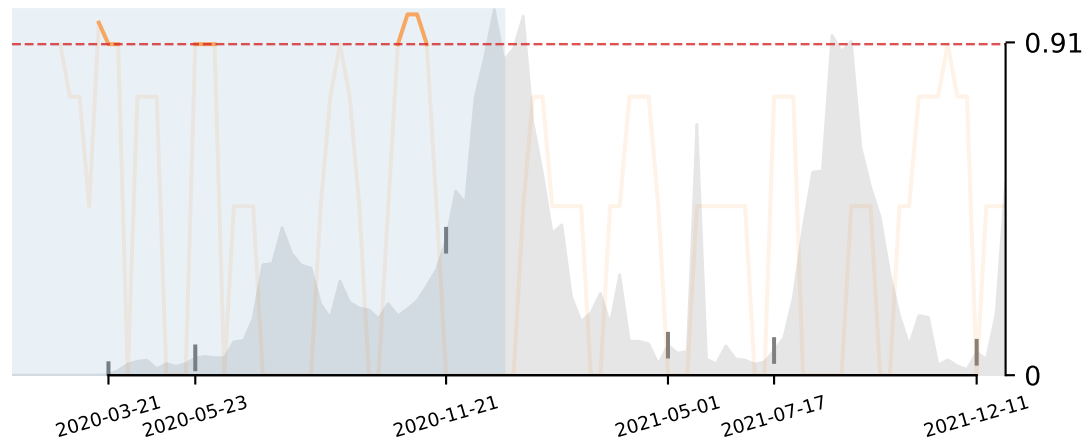

## Performance as a function of $\beta$

| $\beta$ | Training |    |    | Out of sample |    |    |
|---------|----------|----|----|---------------|----|----|
|         | tp       | fp | fn | tp            | fp | fn |
| 1.00    | 0        | 0  | 1  | 0             | 0  | 5  |
| 0.99    | 0        | 0  | 1  | 0             | 0  | 5  |
| 0.96    | 0        | 0  | 1  | 0             | 1  | 4  |
| 0.91    | 1        | 0  | 0  | 2             | 7  | 1  |
| 0.76    | 1        | 1  | 0  | 4             | 13 | 1  |
| 0.46    | 1        | 2  | 0  | 5             | 30 | 0  |
| 0.00    | 1        | 2  | 0  | 5             | 56 | 0  |

| $\beta$ | tp fp fn |   |   | tp fp fn |    |   |
|---------|----------|---|---|----------|----|---|
|         | 1.00     | 0 | 0 | 2        | 0  | 0 |
| 0.99    | 0        | 0 | 2 | 0        | 0  | 4 |
| 0.96    | 0        | 0 | 2 | 0        | 0  | 4 |
| 0.91    | 2        | 2 | 0 | 2        | 0  | 2 |
| 0.76    | 2        | 3 | 0 | 2        | 8  | 1 |
| 0.46    | 2        | 5 | 0 | 4        | 29 | 0 |
| 0.00    | 2        | 6 | 0 | 4        | 46 | 0 |

| $\beta$ | tp fp fn |    |   | tp fp fn |    |   |
|---------|----------|----|---|----------|----|---|
|         | 1.00     | 0  | 0 | 3        | 0  | 0 |
| 0.99    | 0        | 0  | 3 | 0        | 0  | 3 |
| 0.96    | 1        | 0  | 2 | 0        | 0  | 3 |
| 0.91    | 2        | 0  | 1 | 1        | 0  | 2 |
| 0.76    | 3        | 6  | 0 | 3        | 4  | 0 |
| 0.46    | 3        | 10 | 0 | 3        | 19 | 0 |
| 0.00    | 3        | 16 | 0 | 3        | 31 | 0 |

## Proxies selected by the Multiple Sources method

Model 1

- (GT) covid
- (GT) covid-19
- (GT) chest pain
- (GT) covid symptoms
- (GT) Chest pain
- (GT) Wheeze

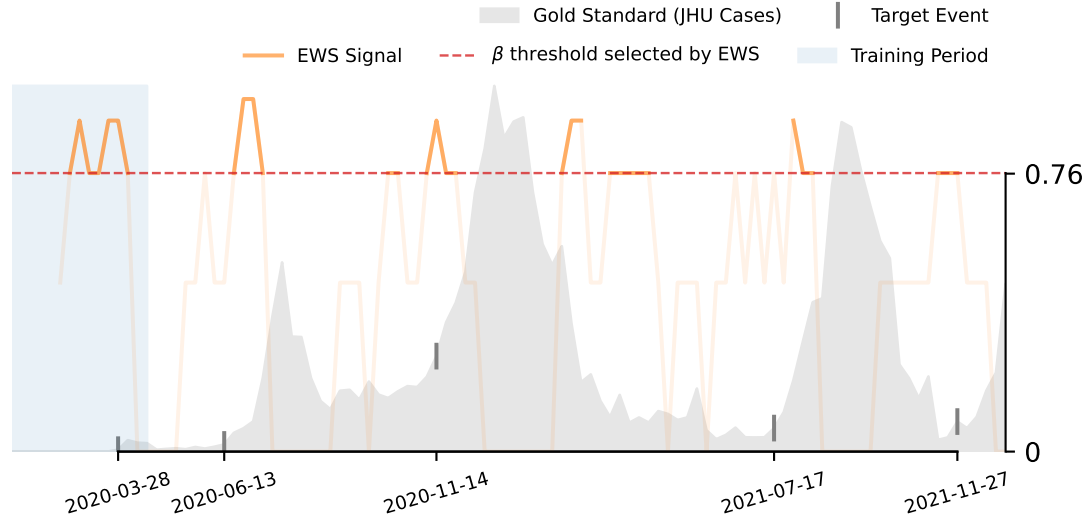

Model 2

- (GT) chest pain
- (GT) Chest pain
- (GT) Chills

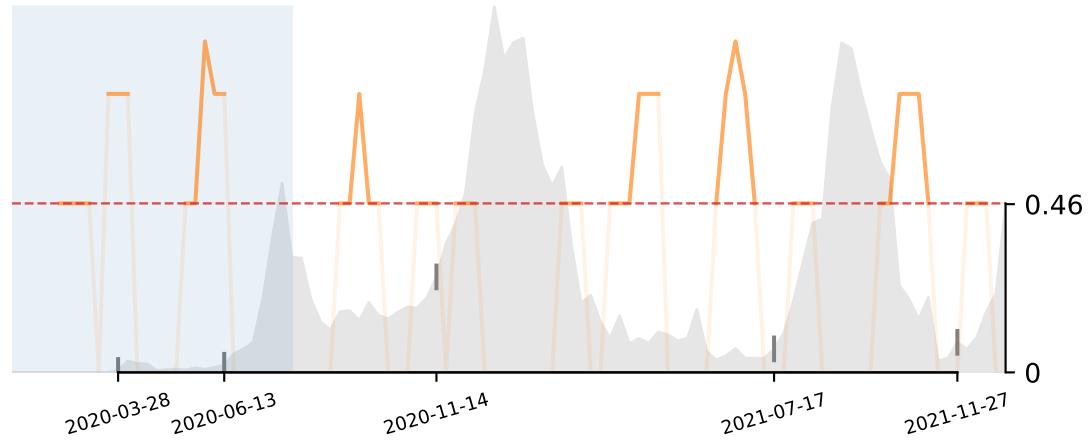

Model 3

- (GT) chest pain
- (GT) covid
- (GT) covid-19
- (GT) covid symptoms
- (GT) Diarrhea
- (GT) Otitis

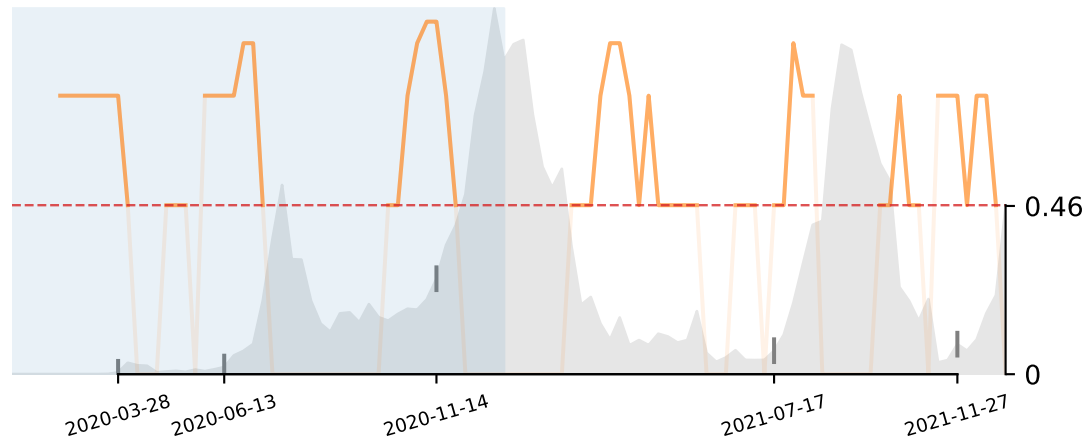

## Performance as a function of $\beta$

| $\beta$ | Training |    |    | Out of sample |    |    |
|---------|----------|----|----|---------------|----|----|
|         | tp       | fp | fn | tp            | fp | fn |
| 1.00    | 0        | 0  | 1  | 0             | 0  | 4  |
| 0.99    | 0        | 0  | 1  | 0             | 0  | 4  |
| 0.96    | 0        | 0  | 1  | 0             | 2  | 3  |
| 0.91    | 0        | 0  | 1  | 1             | 5  | 1  |
| 0.76    | 1        | 0  | 0  | 4             | 17 | 0  |
| 0.46    | 1        | 2  | 0  | 4             | 34 | 0  |
| 0.00    | 1        | 3  | 0  | 4             | 61 | 0  |

| $\beta$ | tp fp fn |   |   | tp fp fn |    |   |
|---------|----------|---|---|----------|----|---|
|         | 0.91     | 0 | 0 | 2        | 1  | 0 |
| 0.76    | 1        | 0 | 1 | 2        | 4  | 1 |
| 0.46    | 2        | 1 | 0 | 3        | 24 | 0 |
| 0.00    | 2        | 3 | 0 | 3        | 53 | 0 |

| $\beta$ | tp fp fn |    |   | tp fp fn |    |   |
|---------|----------|----|---|----------|----|---|
|         | 1.00     | 0  | 0 | 3        | 0  | 0 |
| 0.99    | 0        | 0  | 3 | 0        | 0  | 2 |
| 0.96    | 0        | 0  | 3 | 0        | 0  | 2 |
| 0.91    | 1        | 0  | 2 | 0        | 3  | 1 |
| 0.76    | 1        | 2  | 2 | 1        | 10 | 0 |
| 0.46    | 3        | 6  | 0 | 2        | 24 | 0 |
| 0.00    | 3        | 12 | 0 | 2        | 38 | 0 |

## Proxies selected by the Multiple Sources method

Model 1

- (GT) covid
- (GT) covid-19
- (GT) chest pain
- (GT) covid symptoms
- (GT) fever
- (GT) Anxiety

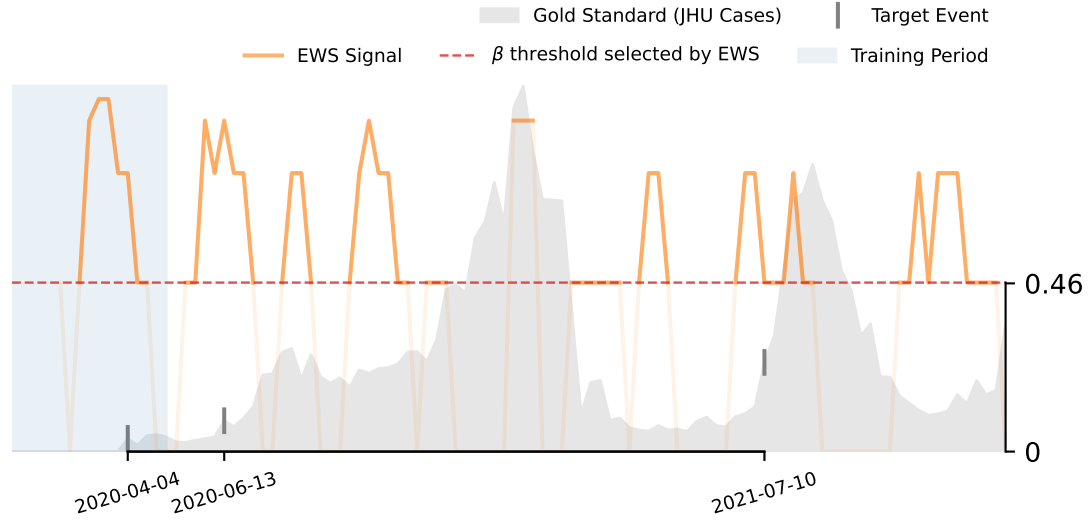

## Performance as a function of $\beta$

| $\beta$ | Training |    |    | Out of sample |    |    |
|---------|----------|----|----|---------------|----|----|
|         | tp       | fp | fn | tp            | fp | fn |
| 1.00    | 0        | 0  | 1  | 0             | 0  | 2  |
| 0.99    | 0        | 0  | 1  | 0             | 0  | 2  |
| 0.96    | 0        | 0  | 1  | 0             | 0  | 2  |
| 0.91    | 1        | 0  | 0  | 1             | 4  | 1  |
| 0.76    | 1        | 0  | 0  | 2             | 18 | 0  |
| 0.46    | 1        | 0  | 0  | 2             | 46 | 0  |
| 0.00    | 1        | 4  | 0  | 2             | 74 | 0  |

Model 2

- (GT) covid
- (GT) covid symptoms
- (GT) fever
- (GT) Anxiety
- (GT) Diarrhea

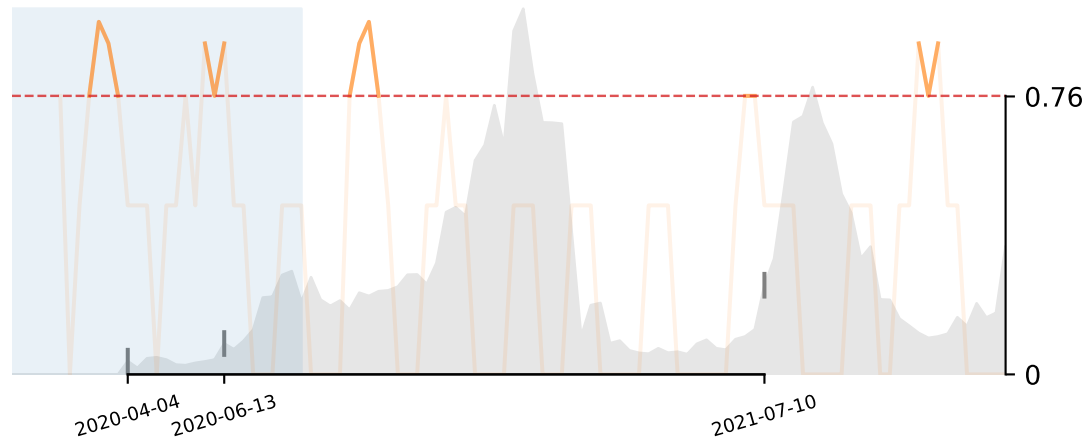

| $\beta$ | tp fp fn |    |   | tp fp fn |    |   |
|---------|----------|----|---|----------|----|---|
|         | 0.99     | 0  | 0 | 2        | 0  | 0 |
| 0.96    | 0        | 0  | 2 | 0        | 1  | 1 |
| 0.91    | 1        | 0  | 1 | 0        | 4  | 1 |
| 0.76    | 2        | 0  | 0 | 1        | 8  | 0 |
| 0.46    | 2        | 1  | 0 | 1        | 32 | 0 |
| 0.00    | 2        | 11 | 0 | 1        | 66 | 0 |

Model 3

- (GT) covid
- (GT) covid symptoms
- (GT) Nasal congestion
- (GT) Anxiety
- (GT) Diarrhea
- (GT) fever

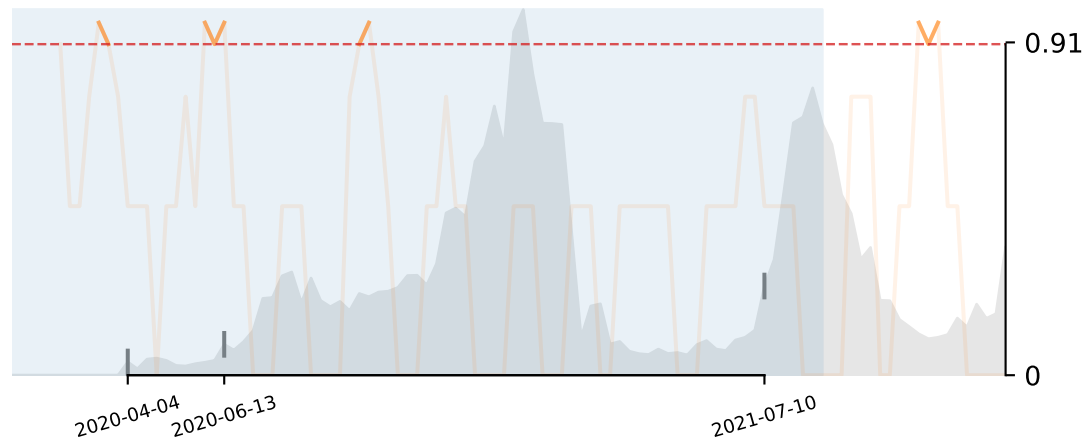

| $\beta$ | tp fp fn |    |   | tp fp fn |    |   |
|---------|----------|----|---|----------|----|---|
|         | 1.00     | 0  | 0 | 3        | 0  | 0 |
| 0.99    | 0        | 0  | 3 | 0        | 0  | 0 |
| 0.96    | 0        | 0  | 3 | 0        | 2  | 0 |
| 0.91    | 2        | 1  | 1 | 0        | 3  | 0 |
| 0.76    | 2        | 3  | 1 | 0        | 6  | 0 |
| 0.46    | 3        | 6  | 0 | 0        | 10 | 0 |
| 0.00    | 3        | 39 | 0 | 0        | 19 | 0 |

## Proxies selected by the Multiple Sources method

Model 1

- (GT) loss of smell
- (GT) chest tightness
- (GT) covid-19 who
- (GT) sars-cov-2
- (GT) covid
- (GT) covid-19

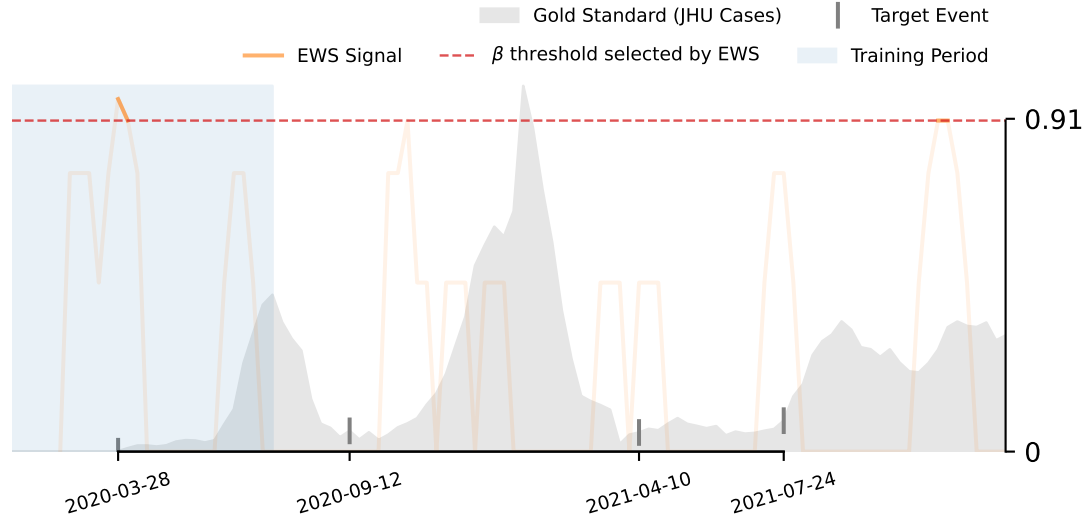

Model 2

- (GT) covid symptoms
- (GT) Acute bronchitis
- (GT) Bronchitis
- (GT) Cough
- (GT) Phlegm
- (GT) Chest pain

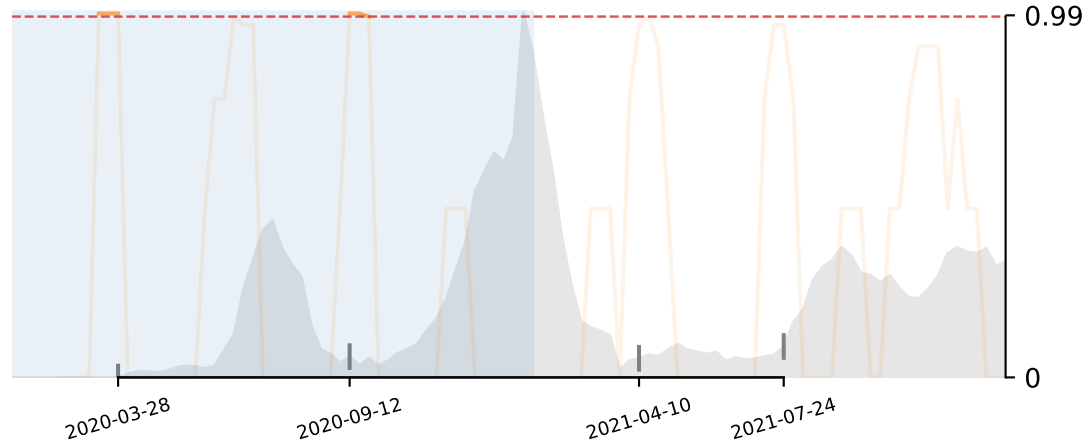

Model 3

- (GT) covid symptoms
- (GT) Acute bronchitis
- (GT) Bronchitis
- (GT) Cough
- (GT) Phlegm
- (GT) Chills

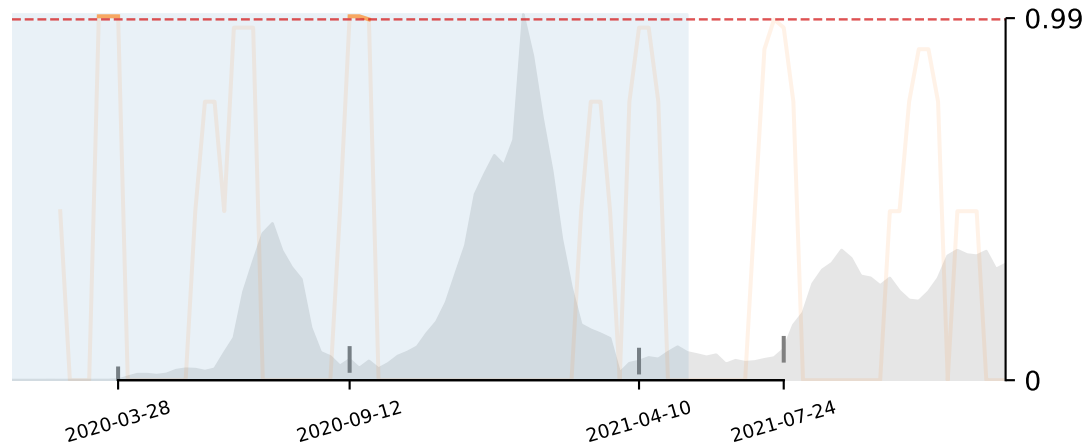

## Performance as a function of $\beta$

| $\beta$ | Training |    |    | Out of sample |    |    |
|---------|----------|----|----|---------------|----|----|
|         | tp       | fp | fn | tp            | fp | fn |
| 1.00    | 0        | 0  | 1  | 0             | 0  | 3  |
| 0.99    | 0        | 0  | 1  | 0             | 0  | 3  |
| 0.96    | 0        | 0  | 1  | 0             | 0  | 3  |
| 0.91    | 1        | 0  | 0  | 0             | 3  | 3  |
| 0.76    | 1        | 1  | 0  | 1             | 7  | 2  |
| 0.46    | 1        | 5  | 0  | 2             | 20 | 1  |
| 0.00    | 1        | 7  | 0  | 3             | 55 | 0  |

| $\beta$ | tp fp fn |    |   | tp fp fn |    |   |
|---------|----------|----|---|----------|----|---|
|         | 1.00     | 0  | 0 | 2        | 0  | 0 |
| 0.99    | 2        | 1  | 0 | 0        | 1  | 1 |
| 0.96    | 2        | 3  | 0 | 2        | 1  | 0 |
| 0.91    | 2        | 5  | 0 | 2        | 5  | 0 |
| 0.76    | 2        | 5  | 0 | 2        | 8  | 0 |
| 0.46    | 2        | 7  | 0 | 2        | 17 | 0 |
| 0.00    | 2        | 11 | 0 | 2        | 35 | 0 |

| $\beta$ | tp fp fn |    |   | tp fp fn |    |   |
|---------|----------|----|---|----------|----|---|
|         | 1.00     | 0  | 0 | 3        | 0  | 0 |
| 0.99    | 2        | 1  | 1 | 1        | 0  | 0 |
| 0.96    | 2        | 2  | 1 | 1        | 0  | 0 |
| 0.91    | 3        | 6  | 0 | 1        | 2  | 0 |
| 0.76    | 3        | 6  | 0 | 1        | 5  | 0 |
| 0.46    | 3        | 10 | 0 | 1        | 10 | 0 |
| 0.00    | 3        | 14 | 0 | 1        | 26 | 0 |

## Proxies selected by the Multiple Sources method

Model 1

- (GT) covid
- (GT) covid-19
- (GT) chest pain
- (GT) covid symptoms
- (GT) quarantine
- (GT) Acute bronchitis

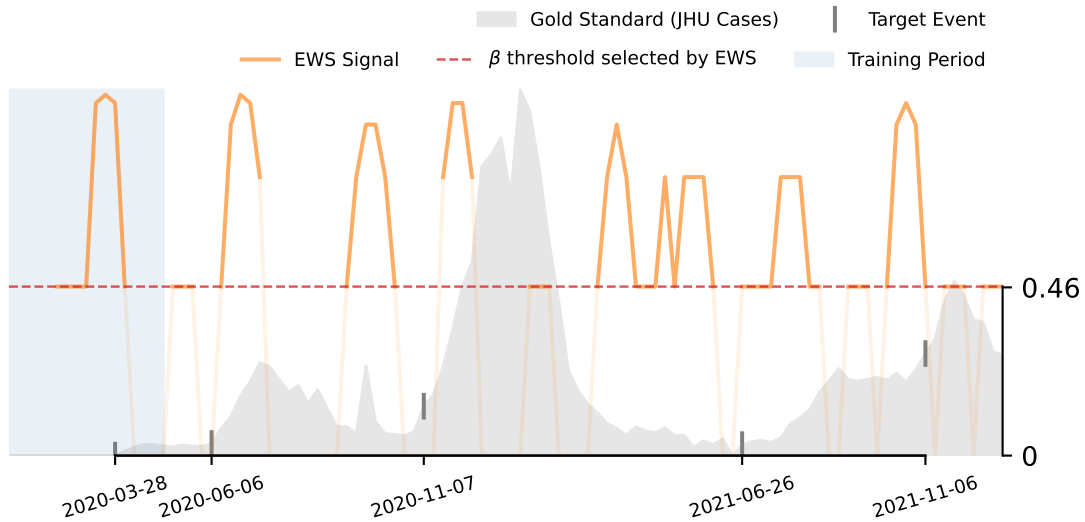

Model 2

- (GT) Ageusia
- (GT) Chills
- (GT) Nasal congestion
- Apple Mobility (driving)
- Apple Mobility (transit)
- (GT) covid symptoms

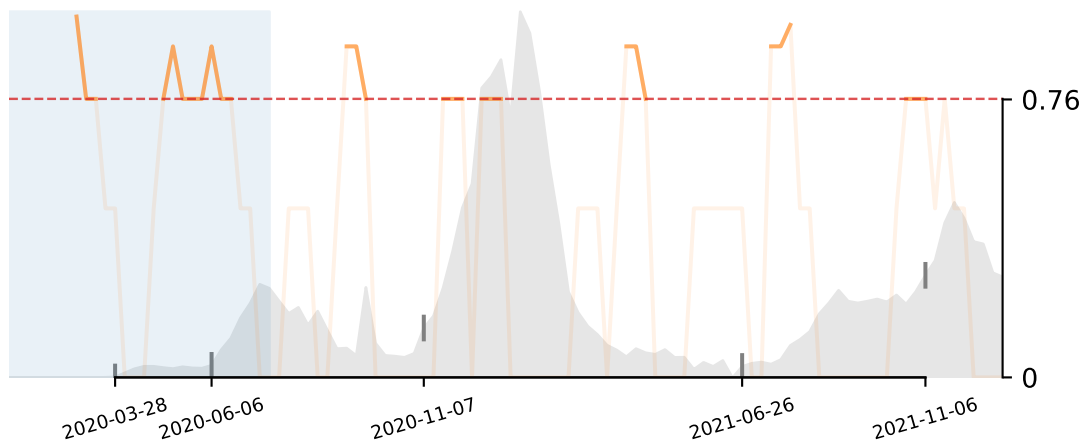

Model 3

- (GT) Ageusia
- (GT) Nasal congestion
- Apple Mobility (driving)
- up2date
- (GT) covid-19
- (GT) covid symptoms

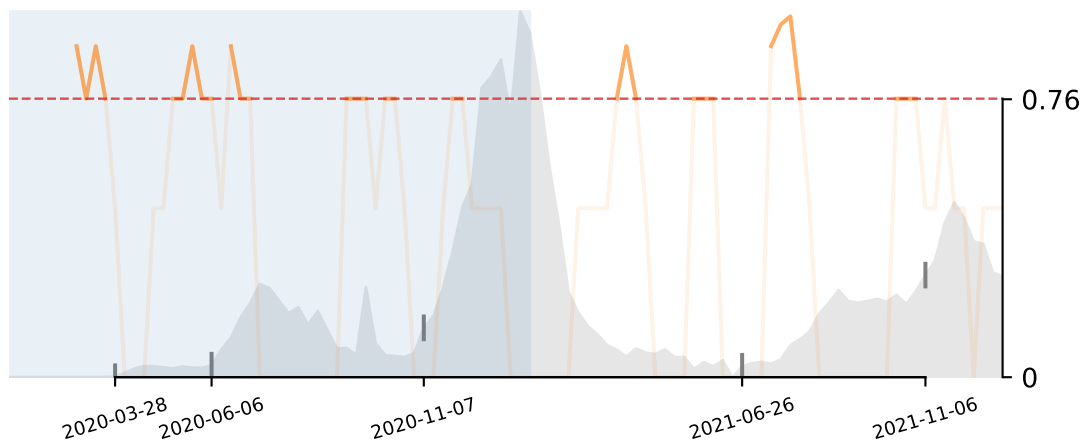

## Performance as a function of $\beta$

| $\beta$ | Training |    |    | Out of sample |    |    |
|---------|----------|----|----|---------------|----|----|
|         | tp       | fp | fn | tp            | fp | fn |
| 1.00    | 0        | 0  | 1  | 0             | 0  | 4  |
| 0.99    | 0        | 0  | 1  | 0             | 1  | 4  |
| 0.96    | 1        | 0  | 0  | 1             | 4  | 3  |
| 0.91    | 1        | 0  | 0  | 2             | 6  | 1  |
| 0.76    | 1        | 0  | 0  | 3             | 16 | 0  |
| 0.46    | 1        | 0  | 0  | 4             | 39 | 0  |
| 0.00    | 1        | 3  | 0  | 4             | 61 | 0  |

| $\beta$ | tp fp fn |   |   | tp fp fn |    |   |
|---------|----------|---|---|----------|----|---|
|         | 1.00     | 0 | 0 | 2        | 0  | 0 |
| 0.99    | 0        | 0 | 2 | 0        | 0  | 3 |
| 0.96    | 1        | 0 | 1 | 0        | 1  | 3 |
| 0.91    | 1        | 0 | 1 | 0        | 7  | 3 |
| 0.76    | 2        | 0 | 0 | 2        | 15 | 1 |
| 0.46    | 2        | 3 | 0 | 3        | 28 | 0 |
| 0.00    | 2        | 6 | 0 | 3        | 55 | 0 |

| $\beta$ | tp fp fn |    |   | tp fp fn |    |   |
|---------|----------|----|---|----------|----|---|
|         | 1.00     | 0  | 0 | 3        | 0  | 0 |
| 0.99    | 0        | 0  | 3 | 0        | 1  | 2 |
| 0.96    | 0        | 0  | 3 | 0        | 2  | 2 |
| 0.91    | 0        | 0  | 3 | 0        | 4  | 2 |
| 0.76    | 2        | 1  | 1 | 2        | 8  | 0 |
| 0.46    | 3        | 8  | 0 | 2        | 20 | 0 |
| 0.00    | 3        | 17 | 0 | 2        | 35 | 0 |

## Proxies selected by the Multiple Sources method

Model 1

- (GT) covid
- (GT) how long does covid last
- (GT) covid-19
- (GT) chest pain
- (GT) covid symptoms
- (GT) chest tightness

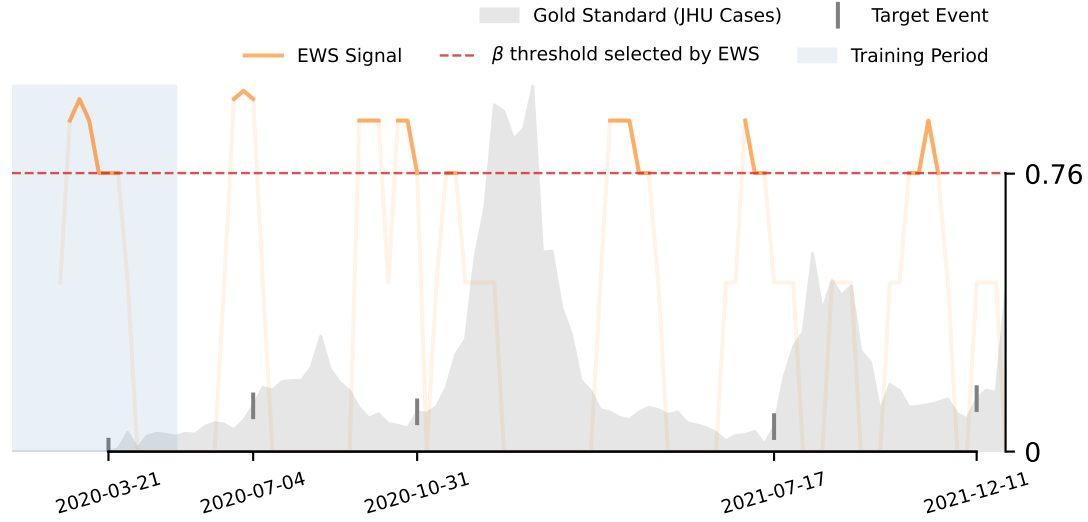

Model 2

- (GT) covid
- (GT) how long does covid last
- (GT) covid-19
- (GT) chest pain
- (GT) covid symptoms
- (GT) quarantine

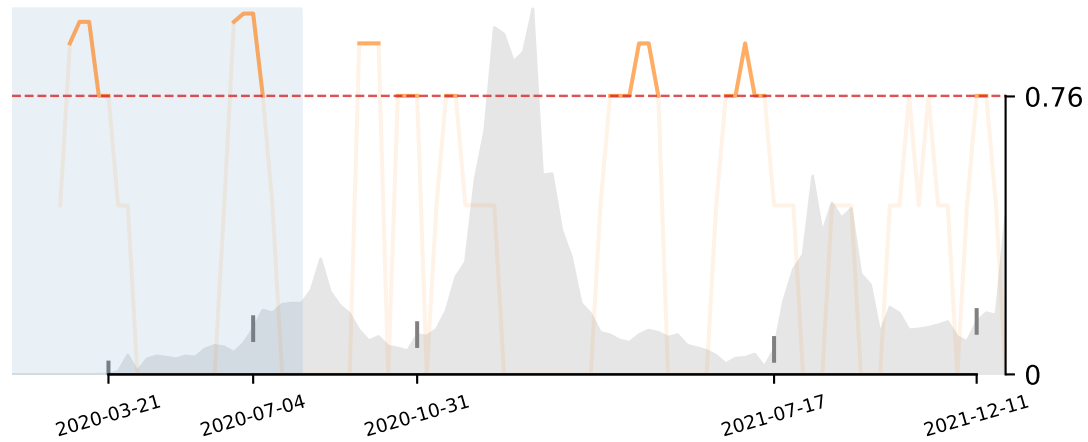

Model 3

- (GT) chest pain
- (GT) covid symptoms
- (GT) Acute bronchitis
- (GT) Sore throat
- (GT) Throat irritation
- (GT) covid

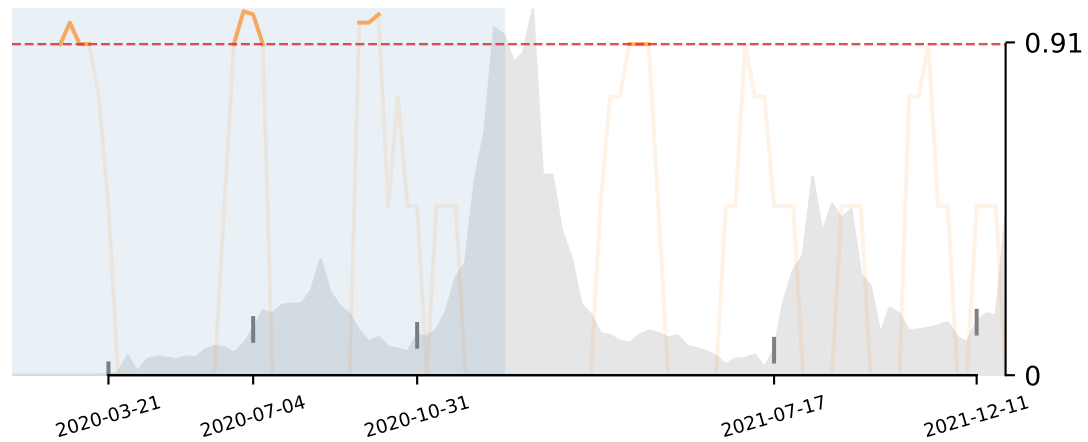

## Performance as a function of $\beta$

| $\beta$ | Training |    |    | Out of sample |    |    |
|---------|----------|----|----|---------------|----|----|
|         | tp       | fp | fn | tp            | fp | fn |
| 1.00    | 0        | 0  | 1  | 0             | 0  | 4  |
| 0.99    | 0        | 0  | 1  | 1             | 0  | 3  |
| 0.96    | 0        | 0  | 1  | 1             | 0  | 3  |
| 0.91    | 1        | 0  | 0  | 4             | 3  | 0  |
| 0.76    | 1        | 0  | 0  | 4             | 8  | 0  |
| 0.46    | 1        | 1  | 0  | 4             | 25 | 0  |
| 0.00    | 1        | 3  | 0  | 4             | 58 | 0  |

| $\beta$ | tp fp fn |   |   | tp fp fn |    |   |
|---------|----------|---|---|----------|----|---|
|         | 1.00     | 0 | 0 | 2        | 0  | 0 |
| 0.99    | 0        | 0 | 2 | 0        | 0  | 3 |
| 0.96    | 1        | 0 | 1 | 0        | 0  | 3 |
| 0.91    | 2        | 0 | 0 | 2        | 2  | 1 |
| 0.76    | 2        | 0 | 0 | 3        | 10 | 0 |
| 0.46    | 2        | 1 | 0 | 3        | 24 | 0 |
| 0.00    | 2        | 5 | 0 | 3        | 52 | 0 |

| $\beta$ | tp fp fn |   |   | tp fp fn |    |   |
|---------|----------|---|---|----------|----|---|
|         | 1.00     | 0 | 0 | 3        | 0  | 0 |
| 0.99    | 1        | 0 | 2 | 0        | 0  | 2 |
| 0.96    | 2        | 0 | 1 | 0        | 0  | 2 |
| 0.91    | 3        | 2 | 0 | 2        | 3  | 0 |
| 0.76    | 3        | 4 | 0 | 2        | 6  | 0 |
| 0.46    | 3        | 4 | 0 | 2        | 15 | 0 |
| 0.00    | 3        | 7 | 0 | 2        | 38 | 0 |

## Proxies selected by the Multiple Sources method

Model 1

- (GT) covid
- (GT) how long does covid last
- (GT) covid-19
- (GT) chest pain
- (GT) covid symptoms
- (GT) chest tightness

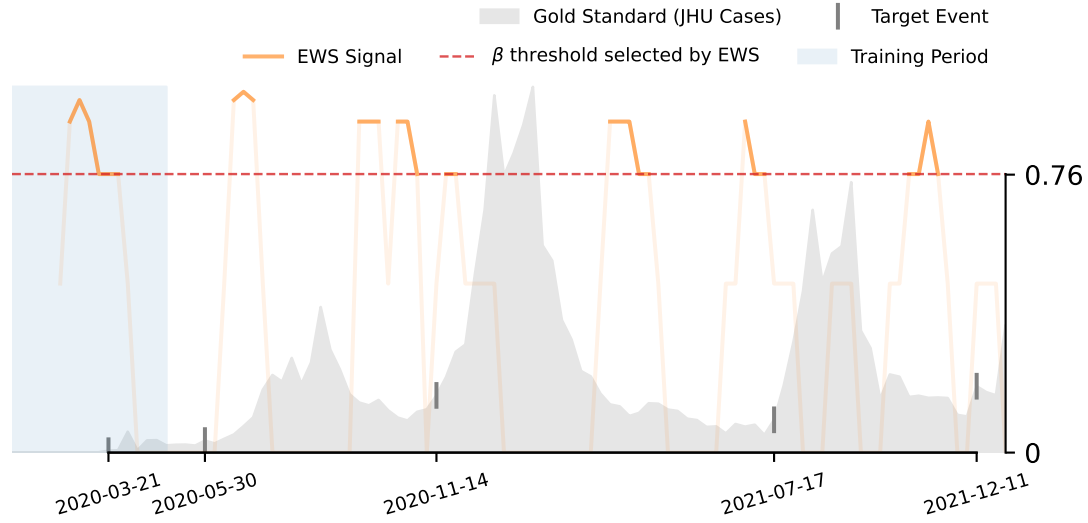

Model 2

- (GT) fever
- (GT) Ageusia
- (GT) Chronic pain
- (GT) Diarrhea
- (GT) Fatigue
- (GT) Otitis

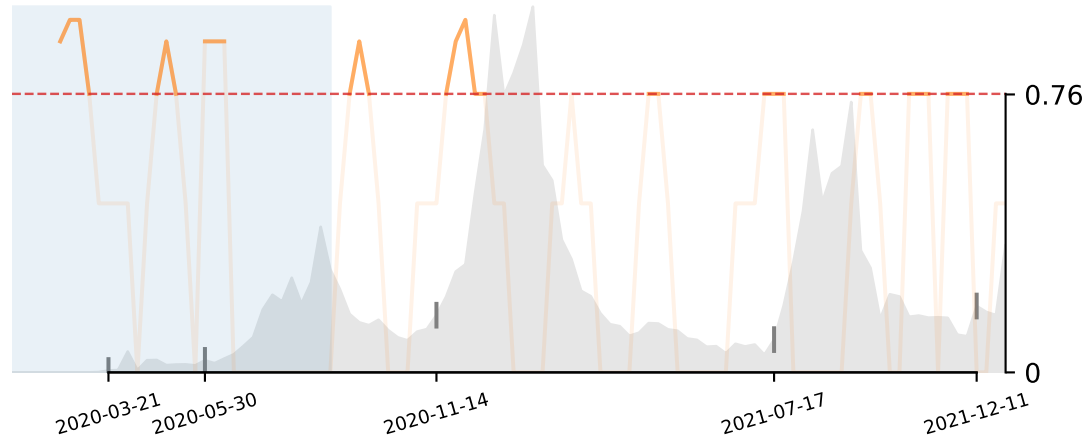

Model 3

- (GT) Ageusia
- (GT) Asthma
- (GT) loss of smell
- (GT) chest tightness
- Apple Mobility (transit)
- (GT) chest pain

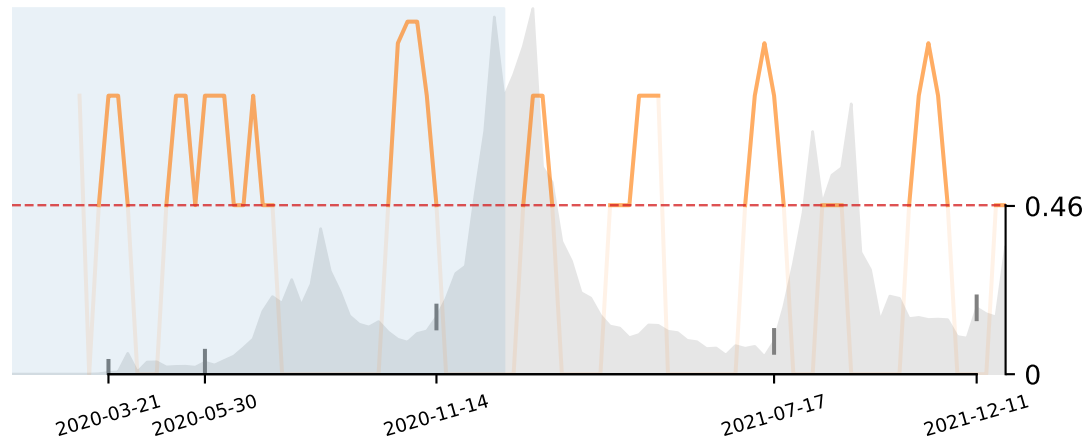

## Performance as a function of $\beta$

| $\beta$ | Training |    |    | Out of sample |    |    |
|---------|----------|----|----|---------------|----|----|
|         | tp       | fp | fn | tp            | fp | fn |
| 1.00    | 0        | 0  | 1  | 0             | 0  | 4  |
| 0.99    | 0        | 0  | 1  | 0             | 1  | 4  |
| 0.96    | 0        | 0  | 1  | 0             | 3  | 4  |
| 0.91    | 1        | 0  | 0  | 3             | 8  | 1  |
| 0.76    | 1        | 0  | 0  | 3             | 13 | 1  |
| 0.46    | 1        | 1  | 0  | 3             | 30 | 0  |
| 0.00    | 1        | 3  | 0  | 4             | 62 | 0  |

| $\beta$ | tp fp fn |   |   | tp fp fn |    |   |
|---------|----------|---|---|----------|----|---|
|         | 1.00     | 0 | 0 | 2        | 0  | 0 |
| 0.99    | 0        | 0 | 2 | 0        | 0  | 3 |
| 0.96    | 0        | 0 | 2 | 0        | 1  | 3 |
| 0.91    | 1        | 0 | 1 | 0        | 3  | 2 |
| 0.76    | 2        | 3 | 0 | 2        | 15 | 0 |
| 0.46    | 2        | 4 | 0 | 3        | 28 | 0 |
| 0.00    | 2        | 7 | 0 | 3        | 49 | 0 |

| $\beta$ | tp fp fn |    |   | tp fp fn |    |   |
|---------|----------|----|---|----------|----|---|
|         | 1.00     | 0  | 0 | 3        | 0  | 0 |
| 0.99    | 0        | 0  | 3 | 0        | 0  | 2 |
| 0.96    | 0        | 0  | 3 | 0        | 0  | 2 |
| 0.91    | 1        | 0  | 2 | 2        | 0  | 0 |
| 0.76    | 1        | 0  | 2 | 2        | 5  | 0 |
| 0.46    | 3        | 4  | 0 | 2        | 17 | 0 |
| 0.00    | 3        | 10 | 0 | 2        | 38 | 0 |

## Proxies selected by the Multiple Sources method

Model 1

- (GT) covid
- (GT) covid-19
- (GT) loss taste
- (GT) covid symptoms
- (GT) quarantine
- (GT) covid-19 who

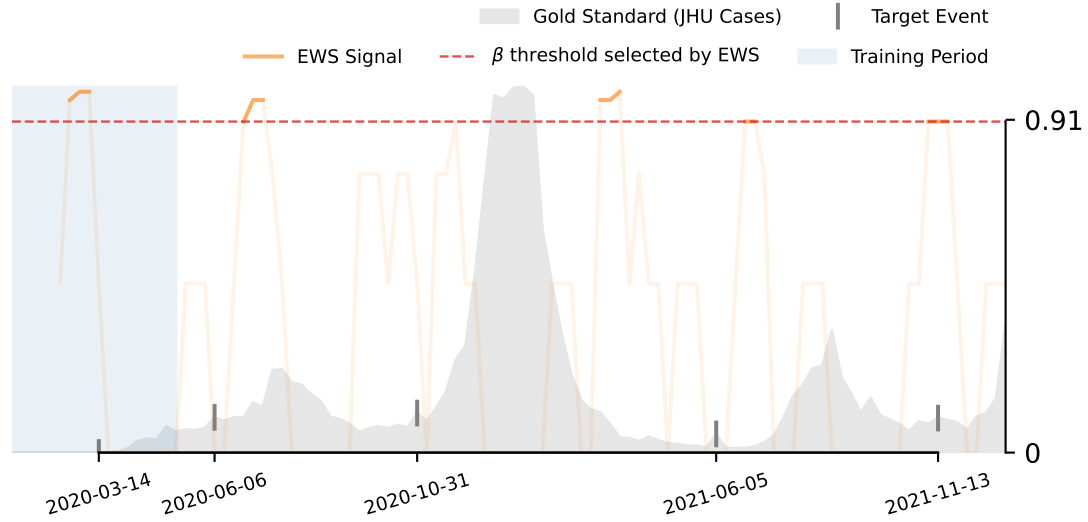

Model 2

- (GT) covid symptoms
- (GT) Chronic pain
- (GT) Diarrhea
- Apple Mobility (transit)
- (GT) nose bleed
- (GT) Asphyxia

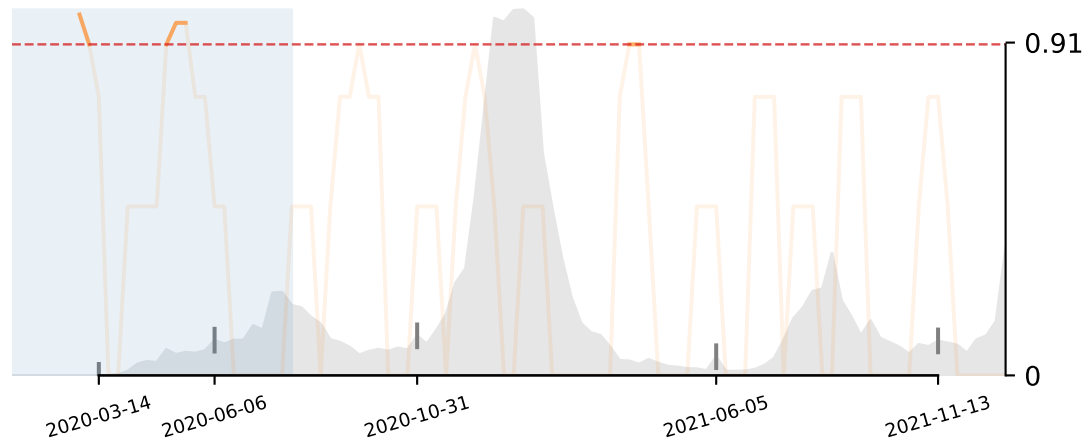

Model 3

- (GT) covid symptoms
- (GT) nose bleed
- (GT) Asphyxia
- (GT) loss of smell
- (GT) covid
- (GT) quarantine

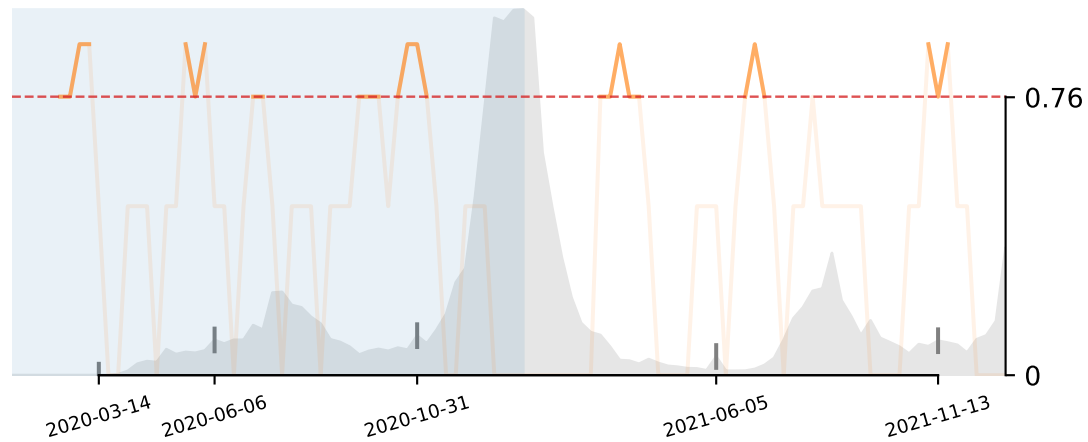

## Performance as a function of $\beta$

| $\beta$ | Training |    |    | Out of sample |    |    |
|---------|----------|----|----|---------------|----|----|
|         | tp       | fp | fn | tp            | fp | fn |
| 1.00    | 0        | 0  | 1  | 0             | 0  | 4  |
| 0.99    | 0        | 0  | 1  | 0             | 1  | 4  |
| 0.96    | 1        | 0  | 0  | 0             | 5  | 4  |
| 0.91    | 1        | 0  | 0  | 1             | 10 | 3  |
| 0.76    | 1        | 0  | 0  | 2             | 15 | 2  |
| 0.46    | 1        | 0  | 0  | 4             | 32 | 0  |
| 0.00    | 1        | 0  | 0  | 4             | 61 | 0  |

| $\beta$ | tp fp fn |   |   | tp fp fn |    |   |
|---------|----------|---|---|----------|----|---|
|         | 1.00     | 0 | 0 | 2        | 0  | 0 |
| 0.99    | 0        | 0 | 2 | 0        | 0  | 3 |
| 0.96    | 1        | 0 | 1 | 0        | 0  | 3 |
| 0.91    | 2        | 0 | 0 | 1        | 3  | 2 |
| 0.76    | 2        | 1 | 0 | 2        | 14 | 1 |
| 0.46    | 2        | 1 | 0 | 3        | 29 | 0 |
| 0.00    | 2        | 7 | 0 | 3        | 53 | 0 |

| $\beta$ | tp fp fn |    |   | tp fp fn |    |   |
|---------|----------|----|---|----------|----|---|
|         | 1.00     | 0  | 0 | 3        | 0  | 0 |
| 0.99    | 0        | 0  | 3 | 0        | 0  | 2 |
| 0.96    | 0        | 0  | 3 | 0        | 0  | 2 |
| 0.91    | 0        | 0  | 3 | 1        | 3  | 1 |
| 0.76    | 3        | 0  | 0 | 1        | 10 | 1 |
| 0.46    | 3        | 5  | 0 | 2        | 22 | 0 |
| 0.00    | 3        | 22 | 0 | 2        | 36 | 0 |



## Proxies selected by the Multiple Sources method

Model 1

- (GT) covid
- (GT) how long does covid last
- (GT) covid-19
- (GT) loss taste
- (GT) chest pain
- (GT) chest tightness

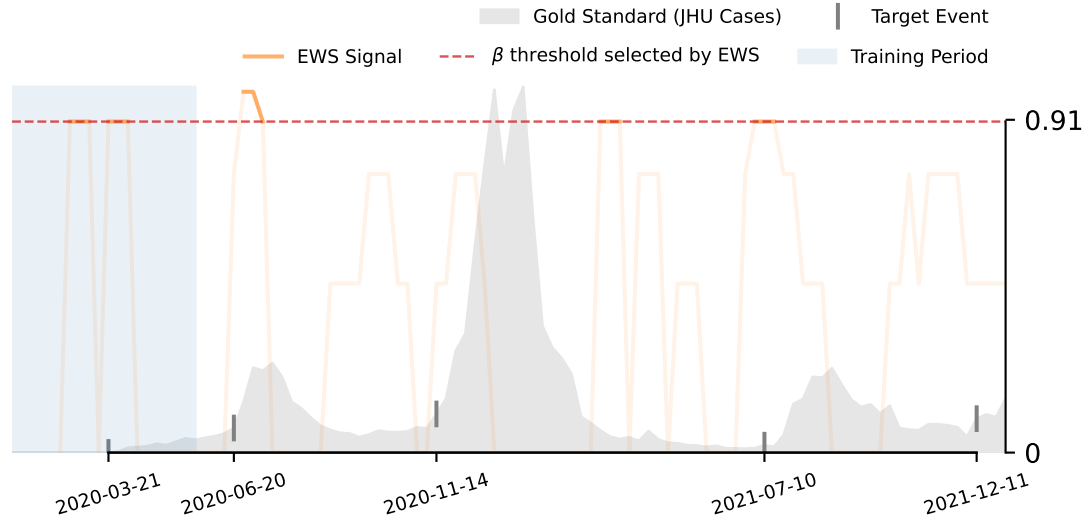

Model 2

- (GT) how long does covid last
- (GT) covid-19
- (GT) covid symptoms
- (GT) Acute bronchitis
- (GT) Ageusia
- (GT) Anosmia

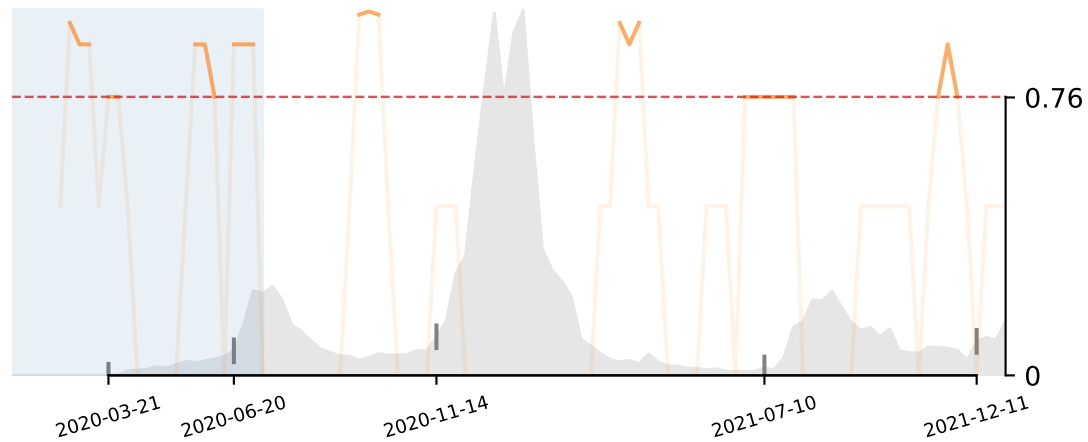

Model 3

- (GT) covid-19
- (GT) loss of smell
- (GT) covid
- (GT) how long does covid last
- (GT) covid symptoms
- (GT) covid-19 who

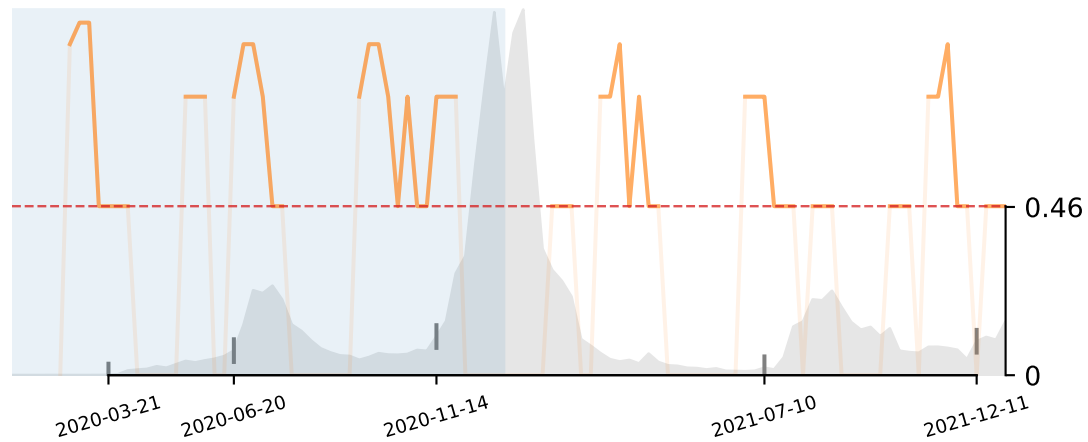

## Performance as a function of $\beta$

| $\beta$ | Training |    |    | Out of sample |    |    |
|---------|----------|----|----|---------------|----|----|
|         | tp       | fp | fn | tp            | fp | fn |
| 1.00    | 0        | 0  | 1  | 0             | 0  | 4  |
| 0.99    | 0        | 0  | 1  | 0             | 2  | 3  |
| 0.96    | 0        | 0  | 1  | 0             | 2  | 3  |
| 0.91    | 0        | 0  | 1  | 1             | 7  | 2  |
| 0.76    | 1        | 2  | 0  | 4             | 17 | 0  |
| 0.46    | 1        | 2  | 0  | 4             | 34 | 0  |
| 0.00    | 1        | 2  | 0  | 4             | 59 | 0  |

| $\beta$ | tp fp fn |   |   | tp fp fn |    |   |
|---------|----------|---|---|----------|----|---|
|         | 1.00     | 0 | 0 | 2        | 0  | 1 |
| 0.99    | 0        | 0 | 2 | 1        | 2  | 2 |
| 0.96    | 0        | 0 | 2 | 1        | 4  | 2 |
| 0.91    | 1        | 0 | 1 | 2        | 5  | 1 |
| 0.76    | 2        | 2 | 0 | 3        | 8  | 0 |
| 0.46    | 2        | 3 | 0 | 3        | 24 | 0 |
| 0.00    | 2        | 6 | 0 | 3        | 56 | 0 |

| $\beta$ | tp fp fn |    |   | tp fp fn |    |   |
|---------|----------|----|---|----------|----|---|
|         | 1.00     | 0  | 0 | 3        | 0  | 0 |
| 0.99    | 0        | 0  | 3 | 0        | 0  | 2 |
| 0.96    | 0        | 0  | 3 | 0        | 0  | 2 |
| 0.91    | 1        | 0  | 2 | 1        | 1  | 1 |
| 0.76    | 1        | 4  | 2 | 2        | 4  | 0 |
| 0.46    | 3        | 10 | 0 | 2        | 22 | 0 |
| 0.00    | 3        | 14 | 0 | 2        | 38 | 0 |

## Proxies selected by the Multiple Sources method

Model 1

- (GT) covid
- (GT) how long does covid last
- (GT) covid-19
- (GT) loss taste
- (GT) chest pain
- (GT) covid symptoms

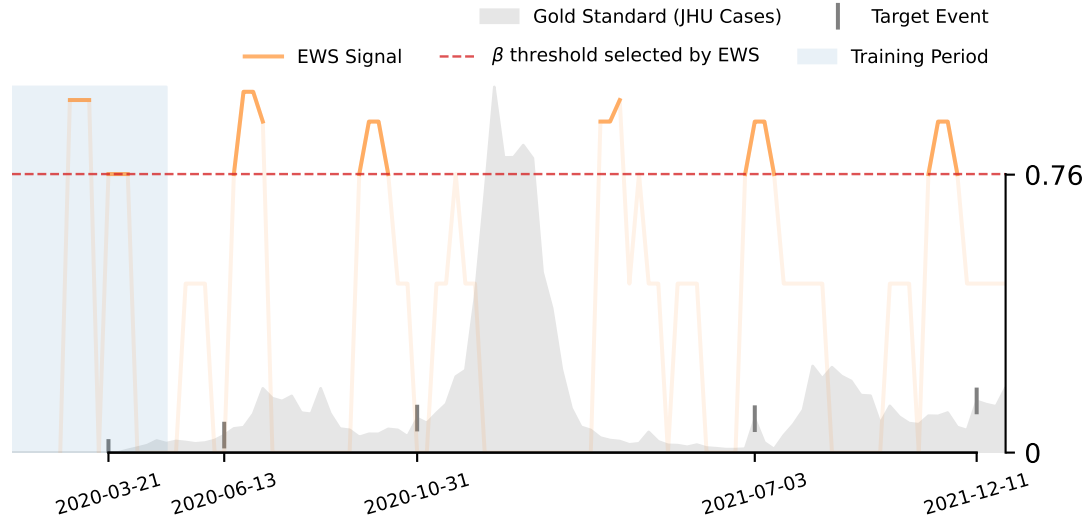

Model 2

- (GT) covid symptoms
- (GT) nose bleed
- (GT) Ageusia
- (GT) Chills
- (GT) Diarrhea
- (GT) Fatigue

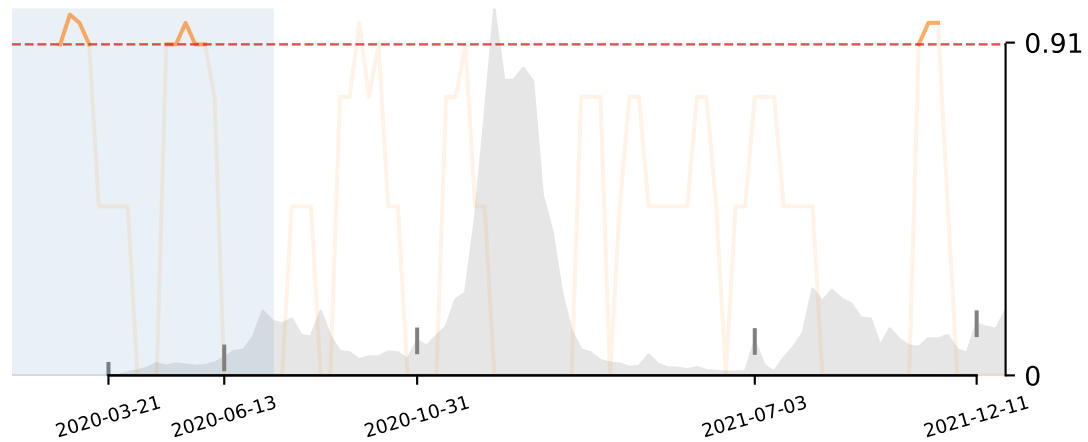

Model 3

- (GT) covid symptoms
- (GT) Ageusia
- (GT) nose bleed
- (GT) Chest pain
- (GT) loss of smell
- Apple Mobility (transit)

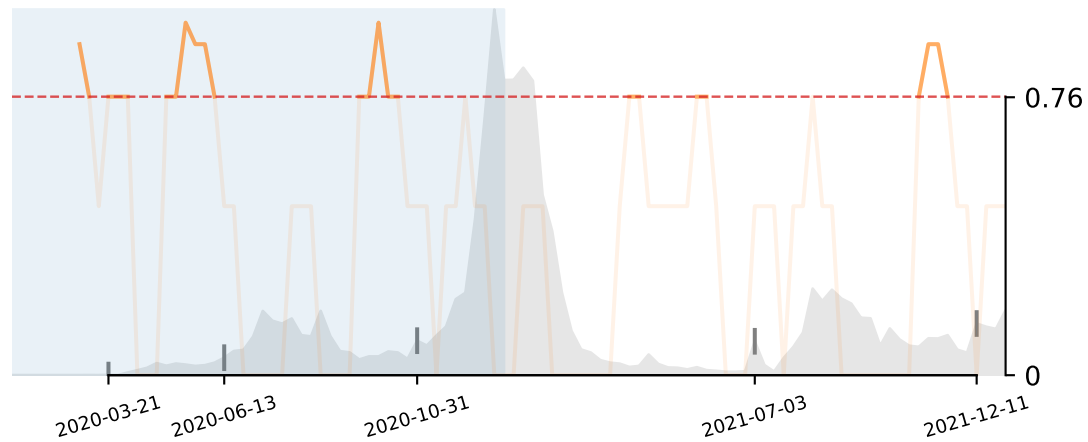

## Performance as a function of $\beta$

| $\beta$ | Training |    |    | Out of sample |    |    |
|---------|----------|----|----|---------------|----|----|
|         | tp       | fp | fn | tp            | fp | fn |
| 1.00    | 0        | 0  | 1  | 0             | 0  | 4  |
| 0.99    | 0        | 0  | 1  | 0             | 2  | 3  |
| 0.96    | 0        | 0  | 1  | 0             | 3  | 3  |
| 0.91    | 1        | 0  | 0  | 3             | 7  | 0  |
| 0.76    | 1        | 0  | 0  | 3             | 11 | 0  |
| 0.46    | 1        | 2  | 0  | 4             | 31 | 0  |
| 0.00    | 1        | 2  | 0  | 4             | 60 | 0  |

| $\beta$ | tp fp fn |   |   | tp fp fn |    |   |
|---------|----------|---|---|----------|----|---|
|         | 1.00     | 0 | 0 | 2        | 0  | 0 |
| 0.99    | 0        | 0 | 2 | 0        | 0  | 3 |
| 0.96    | 1        | 0 | 1 | 2        | 0  | 1 |
| 0.91    | 2        | 0 | 0 | 2        | 1  | 1 |
| 0.76    | 2        | 3 | 0 | 3        | 12 | 0 |
| 0.46    | 2        | 3 | 0 | 3        | 27 | 0 |
| 0.00    | 2        | 5 | 0 | 3        | 55 | 0 |

| $\beta$ | tp fp fn |    |   | tp fp fn |    |   |
|---------|----------|----|---|----------|----|---|
|         | 1.00     | 0  | 0 | 3        | 0  | 0 |
| 0.99    | 0        | 0  | 3 | 0        | 0  | 2 |
| 0.96    | 0        | 0  | 3 | 0        | 0  | 2 |
| 0.91    | 2        | 0  | 1 | 1        | 0  | 1 |
| 0.76    | 3        | 0  | 0 | 2        | 3  | 0 |
| 0.46    | 3        | 7  | 0 | 2        | 21 | 0 |
| 0.00    | 3        | 16 | 0 | 2        | 38 | 0 |

## Proxies selected by the Multiple Sources method

Model 1

- (GT) covid
- (GT) how long does covid last
- (GT) covid-19
- (GT) chest pain
- (GT) covid symptoms
- (GT) quarantine

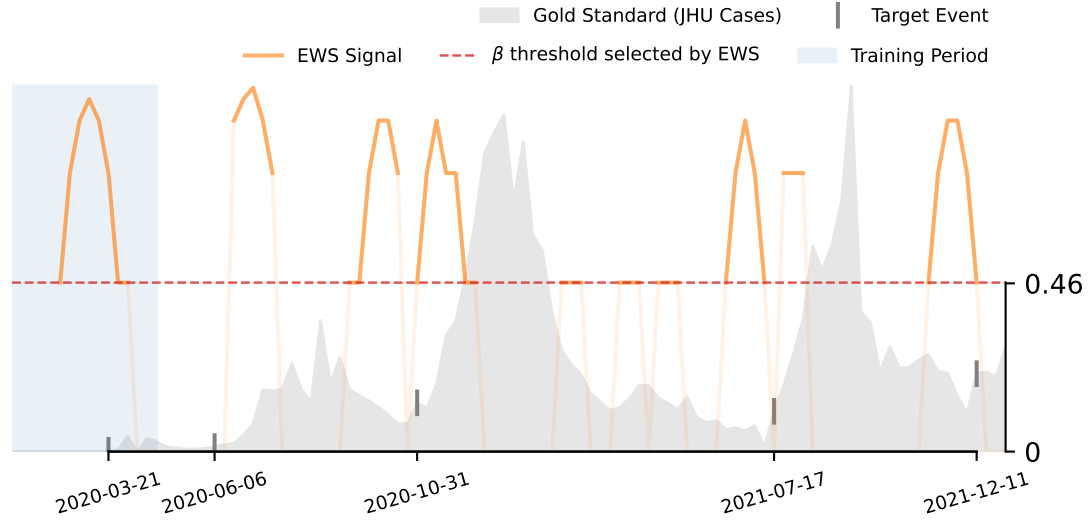

## Performance as a function of $\beta$

| $\beta$ | Training |    |    | Out of sample |    |    |
|---------|----------|----|----|---------------|----|----|
|         | tp       | fp | fn | tp            | fp | fn |
| 1.00    | 0        | 0  | 1  | 0             | 1  | 4  |
| 0.99    | 0        | 0  | 1  | 0             | 1  | 4  |
| 0.96    | 0        | 0  | 1  | 0             | 2  | 4  |
| 0.91    | 1        | 0  | 0  | 3             | 5  | 0  |
| 0.76    | 1        | 0  | 0  | 3             | 12 | 0  |
| 0.46    | 1        | 0  | 0  | 3             | 24 | 0  |
| 0.00    | 1        | 3  | 0  | 4             | 61 | 0  |

Model 2

- (GT) fever
- (GT) Burning Chest Pain
- (GT) Otitis
- Apple Mobility (transit)
- (GT) Nasal congestion
- (GT) Wheeze

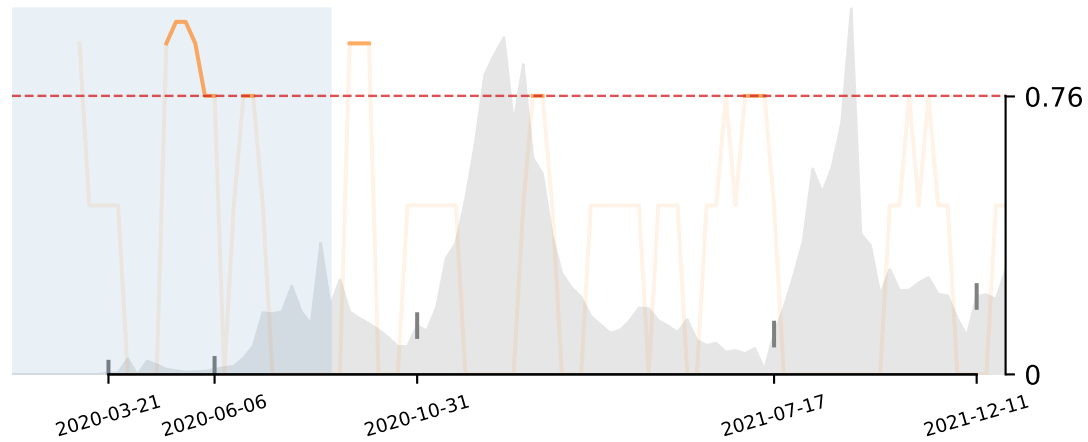

| $\beta$ | tp fp fn |   |   | tp fp fn |    |   |
|---------|----------|---|---|----------|----|---|
|         | 1.00     | 0 | 0 | 2        | 0  | 0 |
| 0.99    | 0        | 0 | 2 | 0        | 0  | 3 |
| 0.96    | 0        | 0 | 2 | 0        | 0  | 3 |
| 0.91    | 1        | 0 | 1 | 1        | 1  | 2 |
| 0.76    | 2        | 1 | 0 | 3        | 4  | 0 |
| 0.46    | 2        | 3 | 0 | 3        | 24 | 0 |
| 0.00    | 2        | 6 | 0 | 3        | 49 | 0 |

Model 3

- (GT) Burning Chest Pain
- Apple Mobility (transit)
- (GT) covid
- (GT) covid symptoms
- (GT) quarantine
- (GT) fever

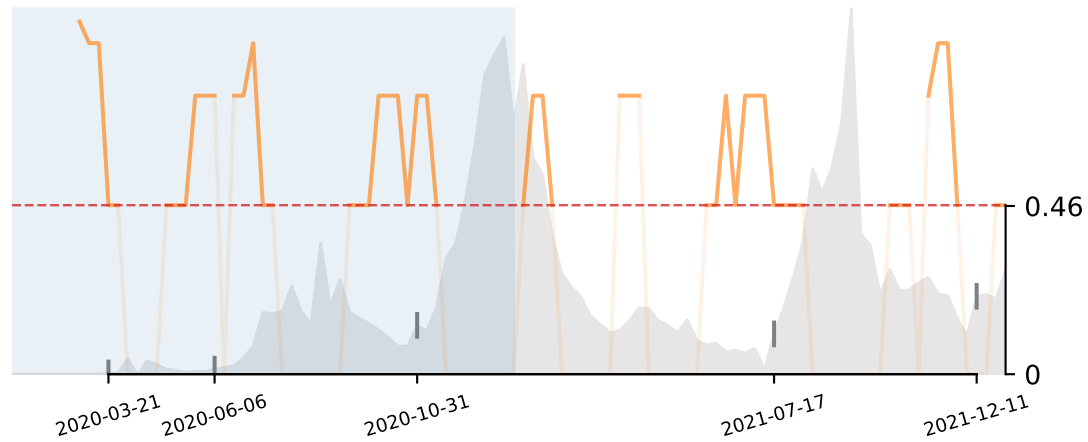

| $\beta$ | tp fp fn |    |   | tp fp fn |    |   |
|---------|----------|----|---|----------|----|---|
|         | 1.00     | 0  | 0 | 3        | 0  | 0 |
| 0.99    | 0        | 0  | 3 | 0        | 0  | 2 |
| 0.96    | 0        | 0  | 3 | 0        | 0  | 2 |
| 0.91    | 1        | 0  | 2 | 1        | 0  | 1 |
| 0.76    | 1        | 1  | 2 | 2        | 5  | 0 |
| 0.46    | 3        | 4  | 0 | 2        | 16 | 0 |
| 0.00    | 3        | 12 | 0 | 2        | 37 | 0 |

## Proxies selected by the Multiple Sources method

Model 1

- (GT) chest tightness
- (GT) covid
- (GT) how long does covid last
- (GT) covid-19
- (GT) loss taste
- (GT) chest pain

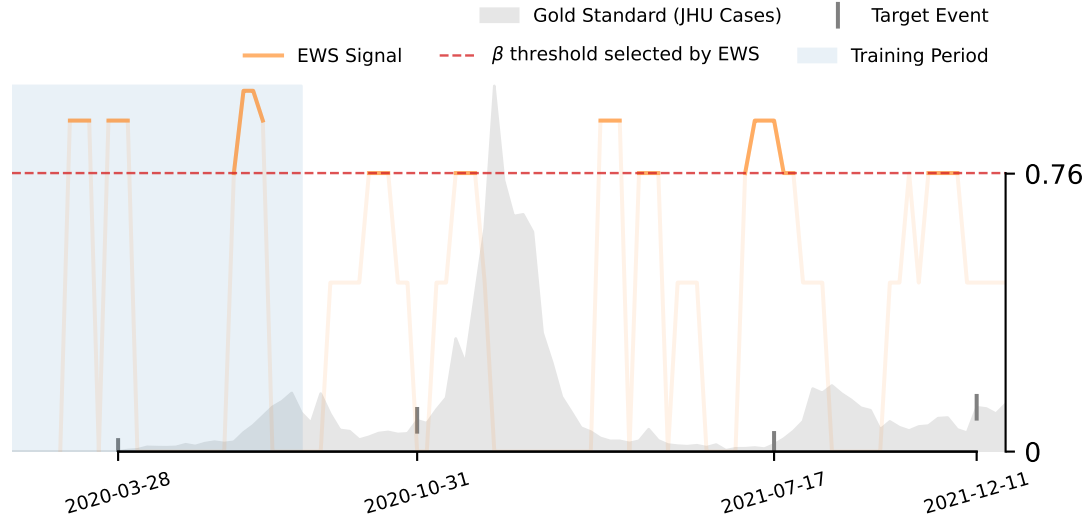

Model 2

- (GT) covid
- (GT) how long does covid last
- (GT) covid symptoms
- (GT) Ageusia
- (GT) Anosmia
- (GT) Bronchitis

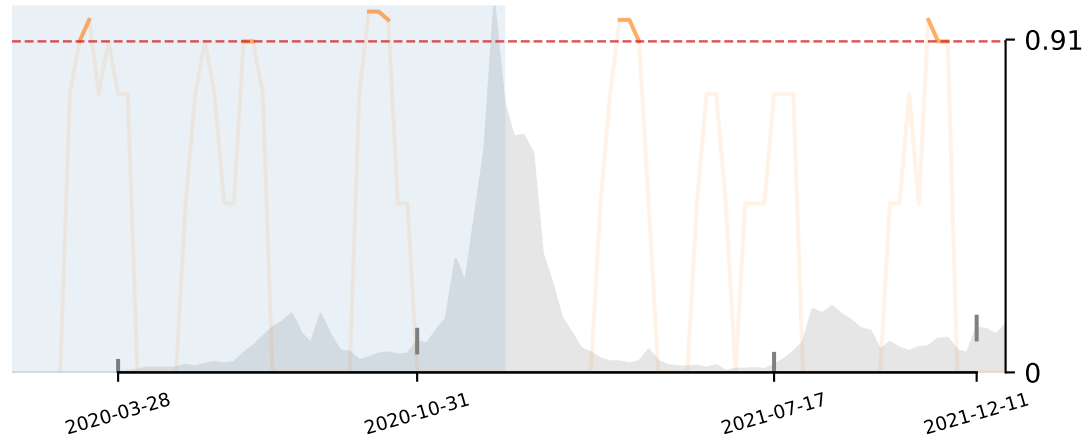

Model 3

- (GT) how long does covid last
- (GT) covid
- (GT) sars-cov-2
- (GT) Fever
- (GT) covid-19
- (GT) Anosmia

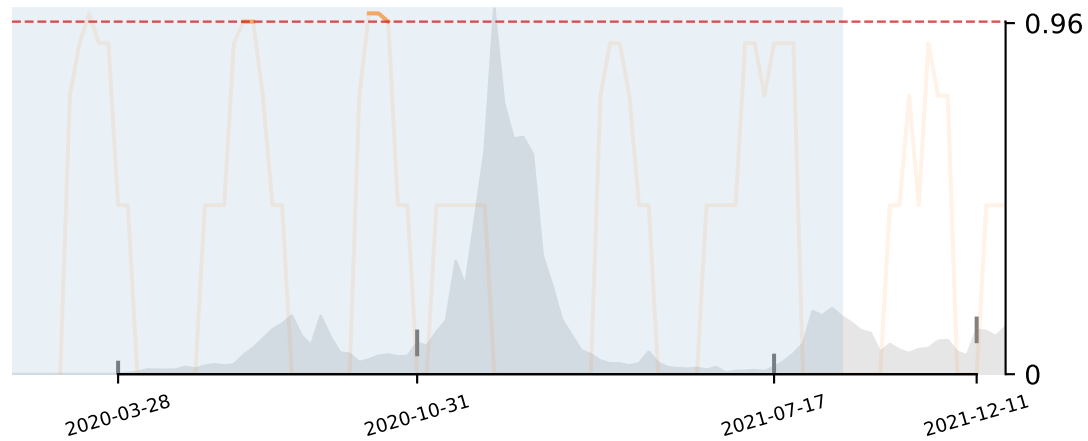

## Performance as a function of $\beta$

| $\beta$ | Training |    |    | Out of sample |    |    |
|---------|----------|----|----|---------------|----|----|
|         | tp       | fp | fn | tp            | fp | fn |
| 1.00    | 0        | 0  | 1  | 0             | 0  | 3  |
| 0.99    | 0        | 0  | 1  | 0             | 0  | 3  |
| 0.96    | 0        | 2  | 1  | 0             | 0  | 3  |
| 0.91    | 0        | 2  | 1  | 1             | 3  | 2  |
| 0.76    | 1        | 5  | 0  | 3             | 12 | 0  |
| 0.46    | 1        | 6  | 0  | 3             | 29 | 0  |
| 0.00    | 1        | 6  | 0  | 3             | 52 | 0  |

| $\beta$ | tp fp fn |    |   | tp fp fn |    |   |
|---------|----------|----|---|----------|----|---|
|         | 1.00     | 0  | 0 | 2        | 0  | 0 |
| 0.99    | 0        | 0  | 2 | 0        | 0  | 2 |
| 0.96    | 1        | 1  | 1 | 1        | 2  | 1 |
| 0.91    | 2        | 1  | 0 | 1        | 3  | 1 |
| 0.76    | 2        | 4  | 0 | 2        | 8  | 0 |
| 0.46    | 2        | 10 | 0 | 2        | 13 | 0 |
| 0.00    | 2        | 13 | 0 | 2        | 38 | 0 |

| $\beta$ | tp fp fn |    |   | tp fp fn |    |   |
|---------|----------|----|---|----------|----|---|
|         | 1.00     | 0  | 0 | 3        | 0  | 0 |
| 0.99    | 0        | 0  | 3 | 0        | 0  | 1 |
| 0.96    | 2        | 1  | 1 | 0        | 0  | 1 |
| 0.91    | 2        | 3  | 1 | 1        | 0  | 0 |
| 0.76    | 3        | 8  | 0 | 1        | 1  | 0 |
| 0.46    | 3        | 13 | 0 | 1        | 6  | 0 |
| 0.00    | 3        | 30 | 0 | 1        | 10 | 0 |

## Proxies selected by the Multiple Sources method

Model 1

- (GT) covid
- (GT) covid-19
- (GT) covid symptoms
- (GT) Acute bronchitis
- (GT) Ageusia
- (GT) Anosmia

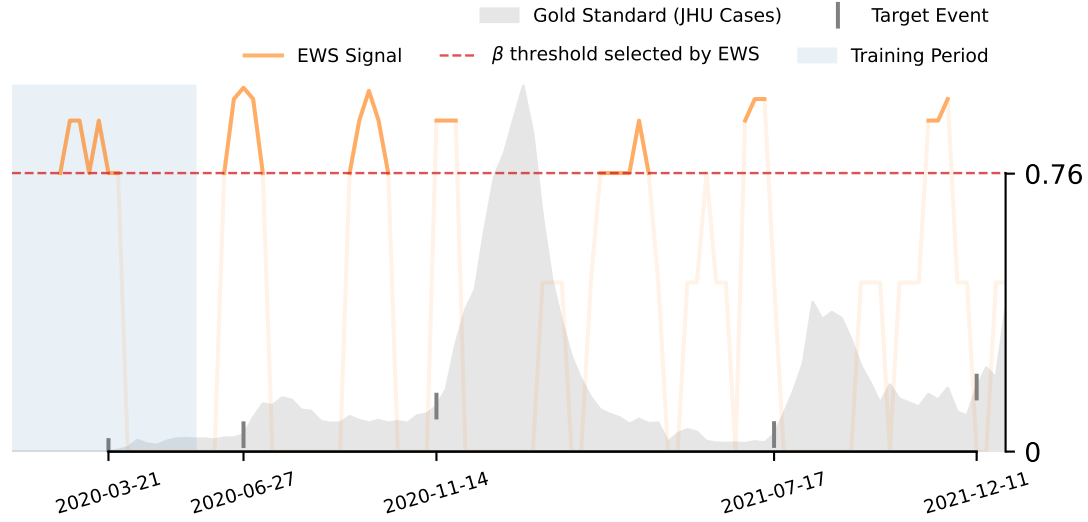

Model 2

- (GT) covid
- (GT) covid-19
- (GT) covid symptoms
- (GT) sars-cov-2
- (GT) Acute bronchitis
- (GT) Ageusia

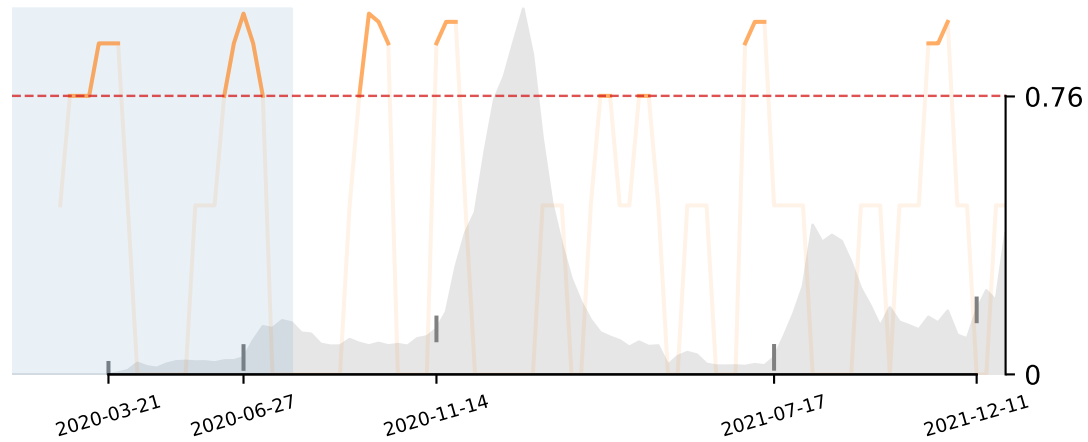

Model 3

- (GT) covid-19
- (GT) covid
- (GT) covid symptoms
- (GT) Fever
- (GT) Wheeze
- (GT) Asphyxia

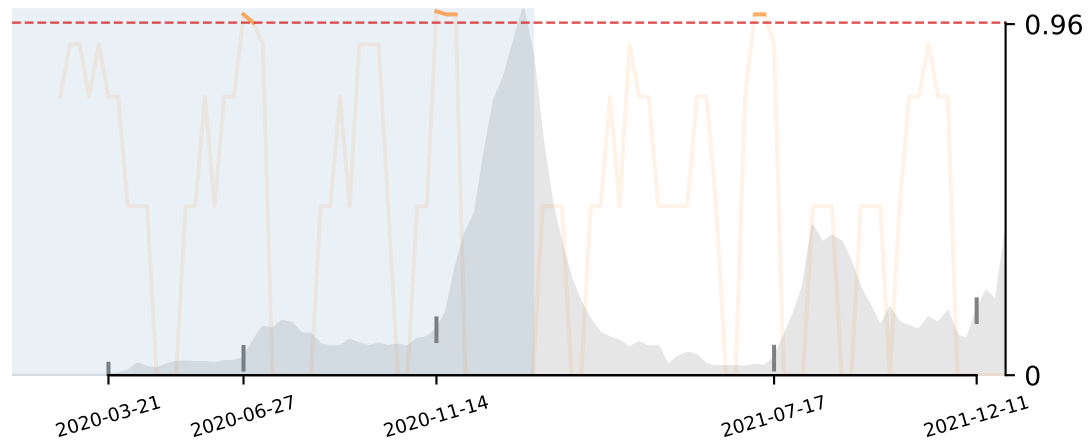

## Performance as a function of $\beta$

| $\beta$ | Training |    |    | Out of sample |    |    |
|---------|----------|----|----|---------------|----|----|
|         | tp       | fp | fn | tp            | fp | fn |
| 1.00    | 0        | 0  | 1  | 1             | 0  | 3  |
| 0.99    | 0        | 0  | 1  | 1             | 1  | 3  |
| 0.96    | 0        | 0  | 1  | 3             | 2  | 1  |
| 0.91    | 0        | 0  | 1  | 4             | 6  | 0  |
| 0.76    | 1        | 0  | 0  | 4             | 14 | 0  |
| 0.46    | 1        | 2  | 0  | 4             | 28 | 0  |
| 0.00    | 1        | 2  | 0  | 4             | 58 | 0  |

| $\beta$ | tp fp fn |   |   | tp fp fn |    |   |
|---------|----------|---|---|----------|----|---|
|         | 1.00     | 0 | 0 | 2        | 0  | 0 |
| 0.99    | 0        | 0 | 2 | 0        | 1  | 3 |
| 0.96    | 1        | 0 | 1 | 3        | 3  | 0 |
| 0.91    | 1        | 0 | 1 | 3        | 3  | 0 |
| 0.76    | 2        | 2 | 0 | 3        | 8  | 0 |
| 0.46    | 2        | 3 | 0 | 3        | 30 | 0 |
| 0.00    | 2        | 6 | 0 | 3        | 53 | 0 |

| $\beta$ | tp fp fn |    |   | tp fp fn |    |   |
|---------|----------|----|---|----------|----|---|
|         | 1.00     | 0  | 0 | 3        | 0  | 0 |
| 0.99    | 1        | 0  | 2 | 1        | 0  | 1 |
| 0.96    | 2        | 2  | 1 | 1        | 0  | 1 |
| 0.91    | 2        | 3  | 1 | 2        | 1  | 0 |
| 0.76    | 3        | 7  | 0 | 2        | 7  | 0 |
| 0.46    | 3        | 10 | 0 | 2        | 24 | 0 |
| 0.00    | 3        | 19 | 0 | 2        | 35 | 0 |

## Proxies selected by the Multiple Sources method

Model 1

- (GT) covid
- (GT) covid-19
- (GT) chest pain
- (GT) covid symptoms
- (GT) chest tightness
- (GT) quarantine

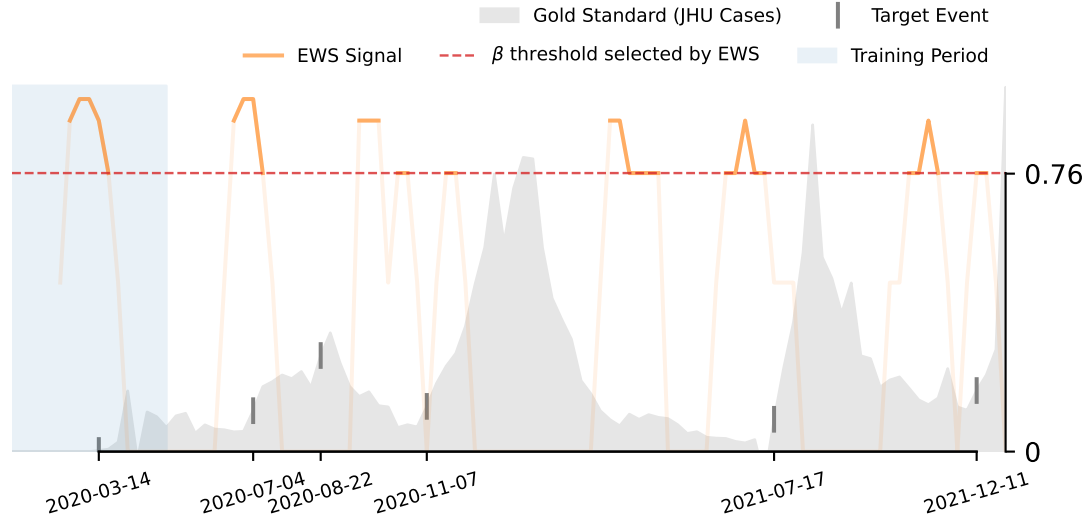

Model 2

- (GT) covid
- (GT) covid-19
- (GT) chest pain
- (GT) covid symptoms
- (GT) quarantine
- (GT) fever

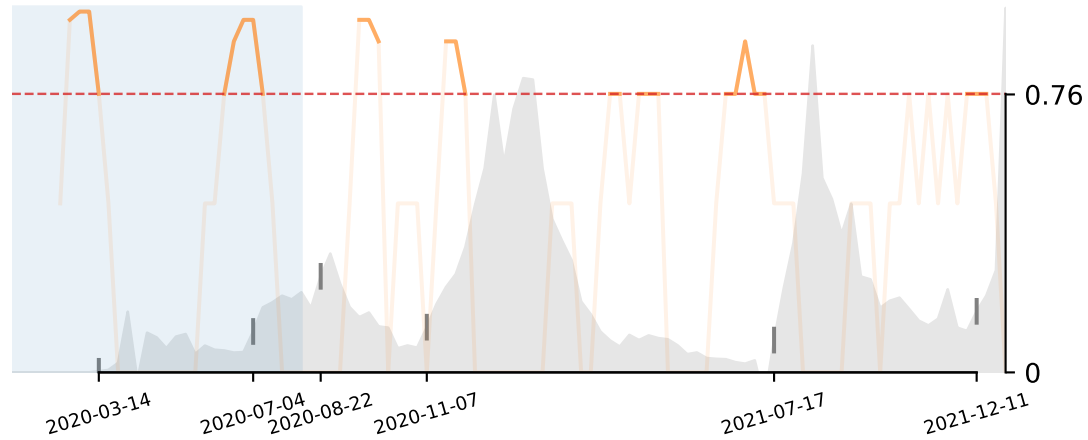

Model 3

- (GT) Asthma
- (GT) covid
- (GT) covid-19
- (GT) chest pain
- (GT) covid symptoms
- (GT) quarantine

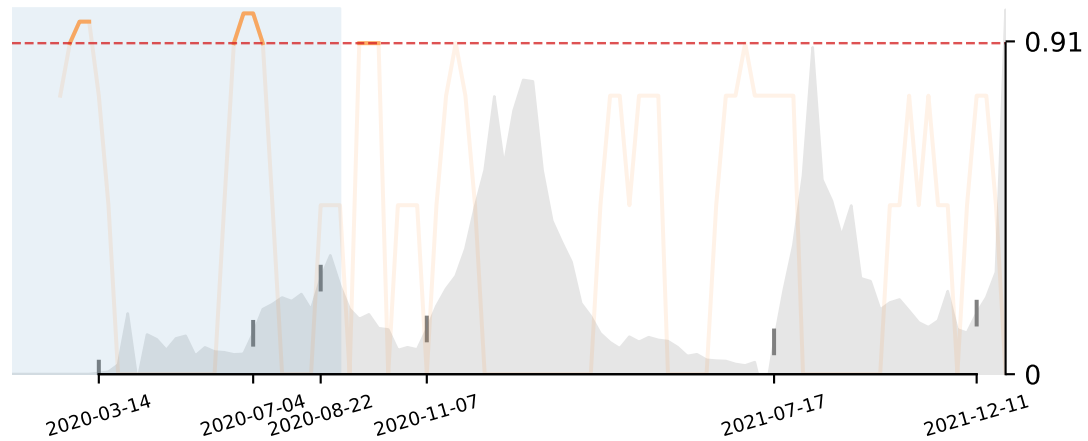

## Performance as a function of $\beta$

| $\beta$ | Training |    |    | Out of sample |    |    |
|---------|----------|----|----|---------------|----|----|
|         | tp       | fp | fn | tp            | fp | fn |
| 1.00    | 0        | 0  | 1  | 0             | 0  | 5  |
| 0.99    | 0        | 0  | 1  | 0             | 0  | 5  |
| 0.96    | 0        | 0  | 1  | 1             | 0  | 4  |
| 0.91    | 1        | 0  | 0  | 4             | 3  | 1  |
| 0.76    | 1        | 0  | 0  | 5             | 11 | 0  |
| 0.46    | 1        | 1  | 0  | 5             | 19 | 0  |
| 0.00    | 1        | 2  | 0  | 5             | 52 | 0  |

| $\beta$ | tp fp fn |   |   | tp fp fn |    |   |
|---------|----------|---|---|----------|----|---|
|         | 1.00     | 0 | 0 | 2        | 0  | 0 |
| 0.99    | 0        | 0 | 2 | 0        | 0  | 4 |
| 0.96    | 1        | 0 | 1 | 1        | 1  | 3 |
| 0.91    | 2        | 0 | 0 | 2        | 3  | 2 |
| 0.76    | 2        | 0 | 0 | 3        | 11 | 1 |
| 0.46    | 2        | 1 | 0 | 3        | 26 | 1 |
| 0.00    | 2        | 4 | 0 | 4        | 50 | 0 |

| $\beta$ | tp fp fn |   |   | tp fp fn |    |   |
|---------|----------|---|---|----------|----|---|
|         | 1.00     | 0 | 0 | 3        | 0  | 0 |
| 0.99    | 0        | 0 | 3 | 0        | 0  | 3 |
| 0.96    | 1        | 0 | 2 | 0        | 0  | 3 |
| 0.91    | 2        | 0 | 1 | 2        | 2  | 1 |
| 0.76    | 2        | 1 | 1 | 3        | 13 | 0 |
| 0.46    | 2        | 1 | 1 | 3        | 20 | 0 |
| 0.00    | 3        | 5 | 0 | 3        | 48 | 0 |

## Proxies selected by the Multiple Sources method

Model 1

- (GT) covid
- (GT) covid-19
- (GT) chest pain
- (GT) covid symptoms
- (GT) chest tightness
- (GT) quarantine

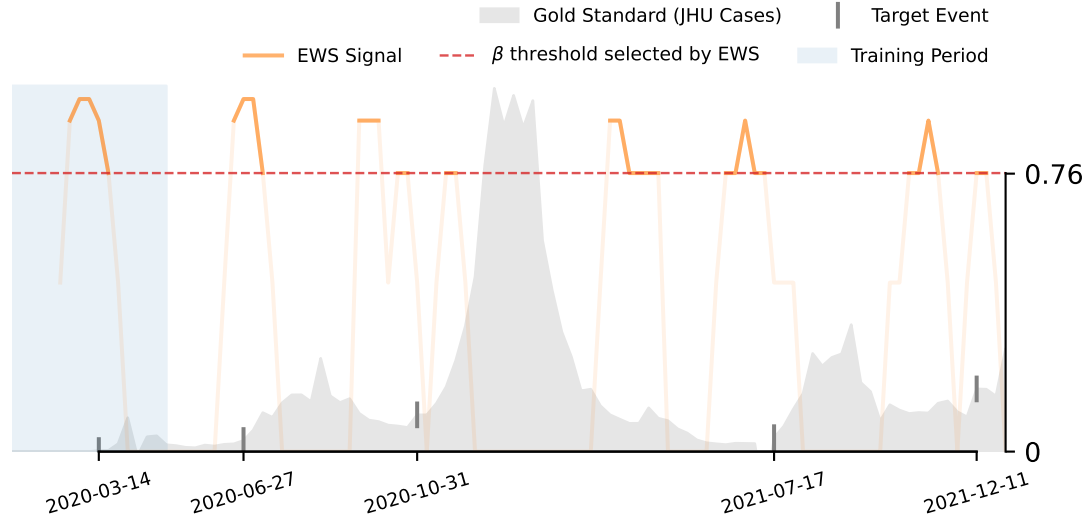

Model 2

- (GT) covid
- (GT) covid-19
- (GT) chest pain
- (GT) covid symptoms
- (GT) fever
- (GT) Acute bronchitis

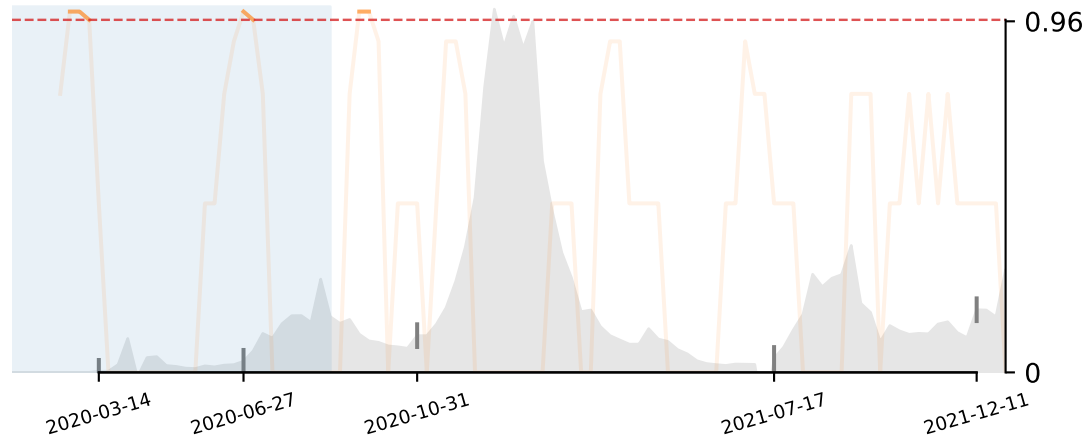

Model 3

- (GT) chest pain
- (GT) covid symptoms
- (GT) Anosmia
- (GT) Fever
- (GT) Otitis
- up2date

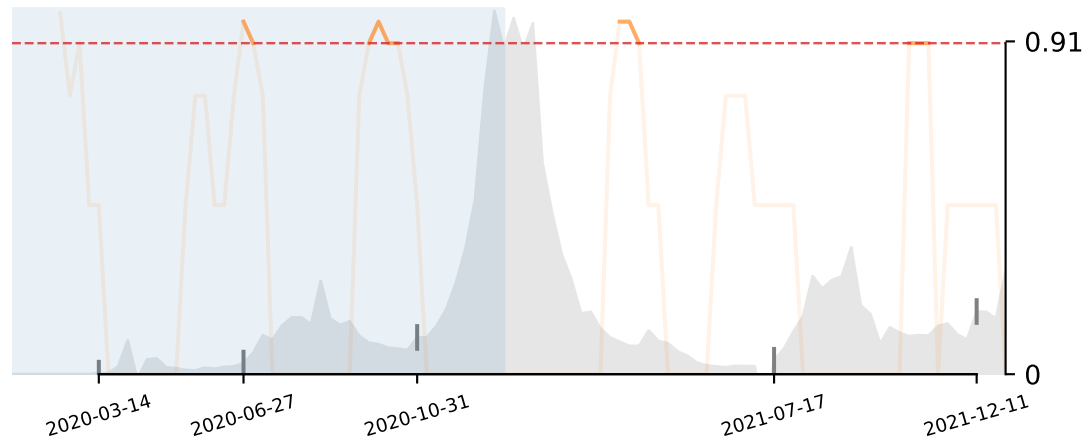

## Performance as a function of $\beta$

| $\beta$ | Training |    |    | Out of sample |    |    |
|---------|----------|----|----|---------------|----|----|
|         | tp       | fp | fn | tp            | fp | fn |
| 1.00    | 0        | 0  | 1  | 0             | 0  | 4  |
| 0.99    | 0        | 0  | 1  | 0             | 0  | 4  |
| 0.96    | 0        | 0  | 1  | 1             | 1  | 3  |
| 0.91    | 1        | 0  | 0  | 4             | 3  | 0  |
| 0.76    | 1        | 0  | 0  | 4             | 12 | 0  |
| 0.46    | 1        | 1  | 0  | 4             | 21 | 0  |
| 0.00    | 1        | 2  | 0  | 4             | 59 | 0  |

| $\beta$ | tp fp fn |   |   | tp fp fn |    |   |
|---------|----------|---|---|----------|----|---|
|         | 1.00     | 0 | 0 | 2        | 0  | 0 |
| 0.99    | 0        | 0 | 2 | 1        | 0  | 2 |
| 0.96    | 2        | 0 | 0 | 1        | 0  | 2 |
| 0.91    | 2        | 1 | 0 | 2        | 4  | 1 |
| 0.76    | 2        | 1 | 0 | 3        | 11 | 0 |
| 0.46    | 2        | 2 | 0 | 3        | 25 | 0 |
| 0.00    | 2        | 2 | 0 | 3        | 49 | 0 |

| $\beta$ | tp fp fn |   |   | tp fp fn |    |   |
|---------|----------|---|---|----------|----|---|
|         | 1.00     | 0 | 0 | 3        | 0  | 0 |
| 0.99    | 0        | 0 | 3 | 0        | 0  | 2 |
| 0.96    | 1        | 0 | 2 | 0        | 2  | 2 |
| 0.91    | 3        | 0 | 0 | 1        | 4  | 1 |
| 0.76    | 3        | 2 | 0 | 2        | 5  | 0 |
| 0.46    | 3        | 5 | 0 | 2        | 11 | 0 |
| 0.00    | 3        | 6 | 0 | 2        | 38 | 0 |

## Proxies selected by the Multiple Sources method

Model 1

- (GT) covid
- (GT) how long does covid last
- (GT) covid-19
- (GT) covid symptoms
- (GT) quarantine
- (GT) sars-cov-2

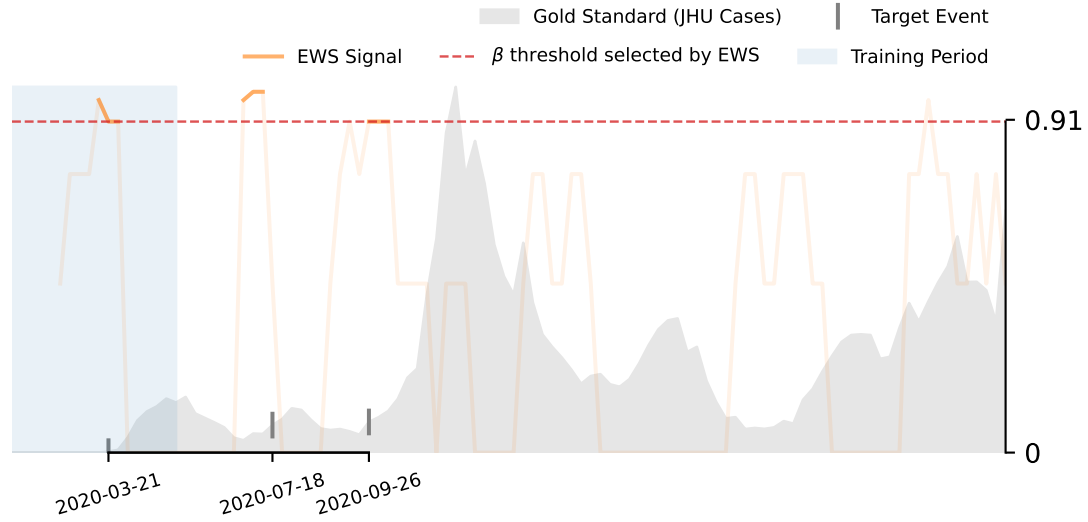

Model 2

- (GT) covid
- (GT) how long does covid last
- (GT) covid-19
- (GT) covid symptoms
- (GT) quarantine
- (GT) Acute bronchitis

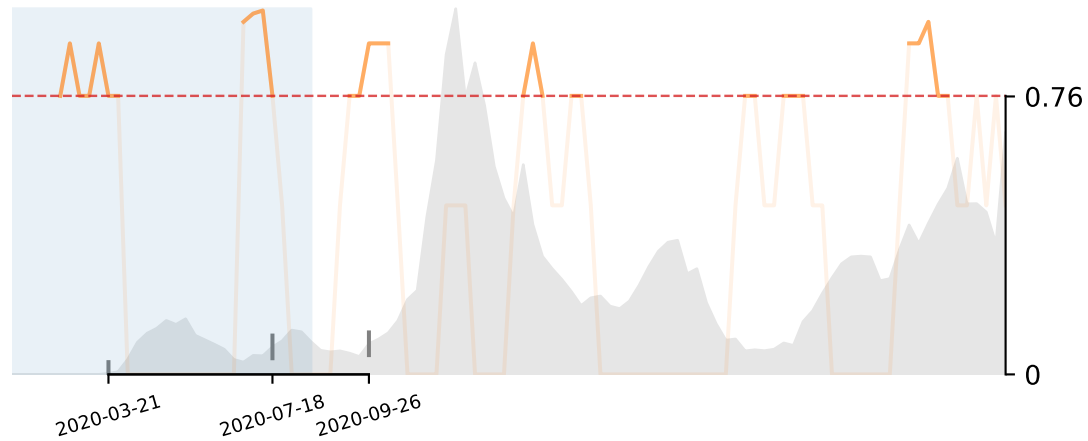

Model 3

- (GT) covid
- (GT) how long does covid last
- (GT) covid symptoms
- (GT) Bronchitis
- (GT) quarantine
- (GT) Acute bronchitis

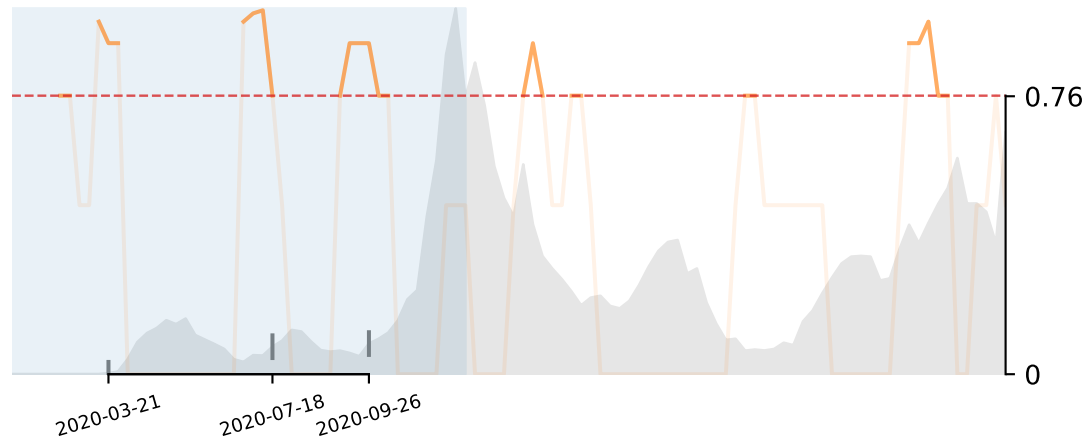

## Performance as a function of $\beta$

| $\beta$ | Training |    |    | Out of sample |    |    |
|---------|----------|----|----|---------------|----|----|
|         | tp       | fp | fn | tp            | fp | fn |
| 1.00    | 0        | 0  | 1  | 0             | 0  | 2  |
| 0.99    | 0        | 0  | 1  | 1             | 0  | 1  |
| 0.96    | 0        | 0  | 1  | 1             | 1  | 1  |
| 0.91    | 1        | 0  | 0  | 2             | 3  | 0  |
| 0.76    | 1        | 1  | 0  | 2             | 18 | 0  |
| 0.46    | 1        | 1  | 0  | 2             | 38 | 0  |
| 0.00    | 1        | 2  | 0  | 2             | 72 | 0  |

| $\beta$ | tp |    |    | fp |    |    | fn |    |    |
|---------|----|----|----|----|----|----|----|----|----|
|         | tp | fp | fn | tp | fp | fn | tp | fp | fn |
| 1.00    | 0  | 0  | 2  | 0  | 0  | 1  | 0  | 0  | 1  |
| 0.99    | 1  | 0  | 1  | 0  | 0  | 1  | 0  | 0  | 1  |
| 0.96    | 1  | 0  | 1  | 0  | 1  | 1  | 0  | 1  | 1  |
| 0.91    | 1  | 0  | 1  | 1  | 6  | 0  | 1  | 19 | 0  |
| 0.76    | 2  | 0  | 0  | 1  | 19 | 0  | 1  | 37 | 0  |
| 0.46    | 2  | 2  | 0  | 1  | 37 | 0  | 1  | 66 | 0  |
| 0.00    | 2  | 3  | 0  | 1  | 66 | 0  | 1  | 66 | 0  |

| $\beta$ | tp |    |    | fp |    |    | fn |    |    |
|---------|----|----|----|----|----|----|----|----|----|
|         | tp | fp | fn | tp | fp | fn | tp | fp | fn |
| 1.00    | 0  | 0  | 3  | 0  | 0  | 0  | 0  | 0  | 0  |
| 0.99    | 1  | 0  | 2  | 0  | 0  | 0  | 0  | 0  | 0  |
| 0.96    | 1  | 0  | 2  | 0  | 1  | 0  | 0  | 1  | 0  |
| 0.91    | 2  | 0  | 1  | 0  | 4  | 0  | 0  | 4  | 0  |
| 0.76    | 3  | 1  | 0  | 0  | 13 | 0  | 0  | 13 | 0  |
| 0.46    | 3  | 4  | 0  | 0  | 29 | 0  | 0  | 29 | 0  |
| 0.00    | 3  | 8  | 0  | 0  | 56 | 0  | 0  | 56 | 0  |



## Proxies selected by the Multiple Sources method

Model 1

- (GT) covid
- (GT) how long does covid last
- (GT) covid-19
- (GT) covid symptoms
- (GT) quarantine
- (GT) sars-cov-2

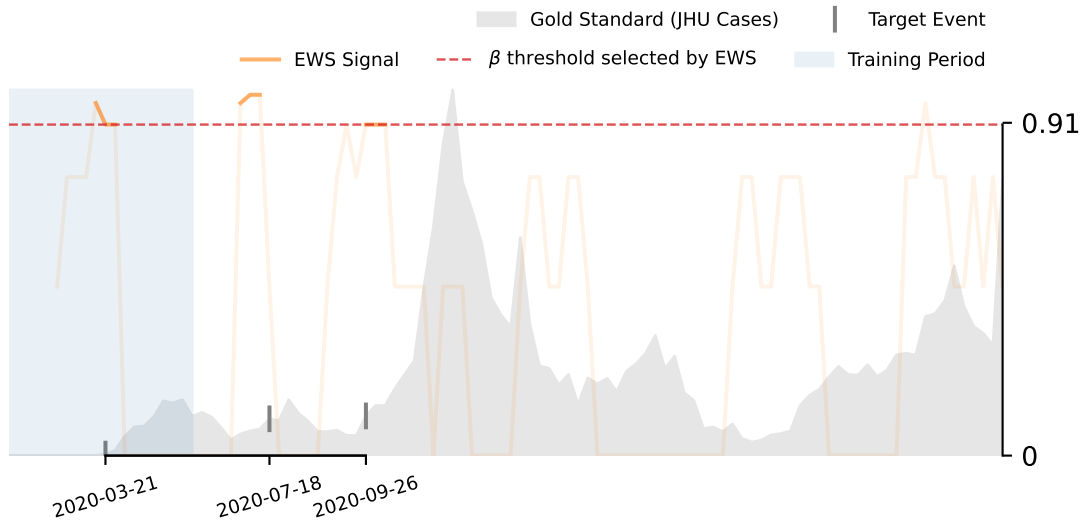

Model 2

- (GT) covid
- (GT) how long does covid last
- (GT) covid-19
- (GT) covid symptoms
- (GT) quarantine
- (GT) Acute bronchitis

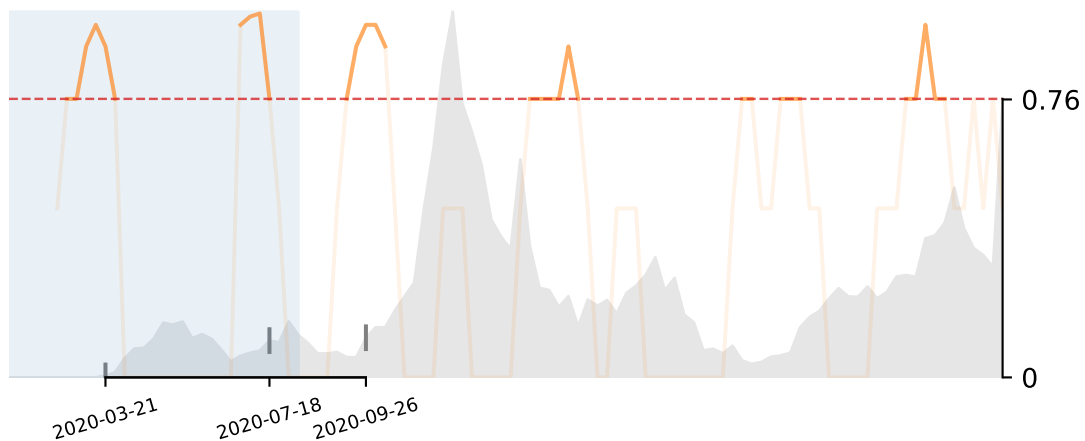

Model 3

- (GT) covid
- (GT) how long does covid last
- (GT) covid symptoms
- (GT) Acute bronchitis
- (GT) Ageusia
- (GT) Anosmia

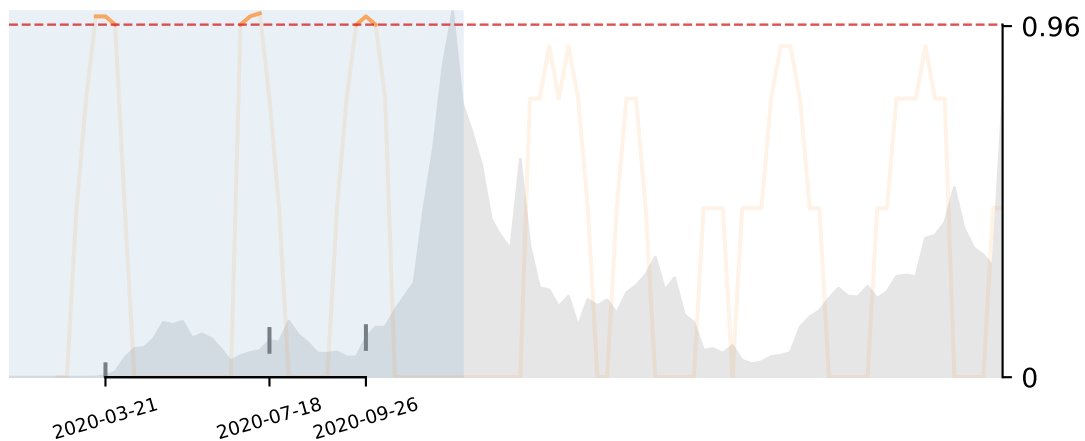

## Performance as a function of $\beta$

| $\beta$ | Training |    |    | Out of sample |    |    |
|---------|----------|----|----|---------------|----|----|
|         | tp       | fp | fn | tp            | fp | fn |
| 1.00    | 0        | 0  | 1  | 0             | 0  | 2  |
| 0.99    | 0        | 0  | 1  | 1             | 0  | 1  |
| 0.96    | 0        | 0  | 1  | 1             | 1  | 1  |
| 0.91    | 1        | 0  | 0  | 2             | 3  | 0  |
| 0.76    | 1        | 1  | 0  | 2             | 18 | 0  |
| 0.46    | 1        | 1  | 0  | 2             | 38 | 0  |
| 0.00    | 1        | 2  | 0  | 2             | 70 | 0  |

| $\beta$ | tp |    |    | fp |    |    | fn |    |    |
|---------|----|----|----|----|----|----|----|----|----|
|         | tp | fp | fn | tp | fp | fn | tp | fp | fn |
| 1.00    | 0  | 0  | 2  | 0  | 0  | 1  | 0  | 0  | 1  |
| 0.99    | 1  | 0  | 1  | 0  | 0  | 1  | 0  | 0  | 1  |
| 0.96    | 1  | 0  | 1  | 1  | 2  | 0  | 1  | 2  | 0  |
| 0.91    | 2  | 0  | 0  | 1  | 4  | 0  | 1  | 4  | 0  |
| 0.76    | 2  | 0  | 0  | 1  | 20 | 0  | 1  | 20 | 0  |
| 0.46    | 2  | 1  | 0  | 1  | 41 | 0  | 1  | 41 | 0  |
| 0.00    | 2  | 3  | 0  | 1  | 66 | 0  | 1  | 66 | 0  |

| $\beta$ | tp |    |    | fp |    |    | fn |    |    |
|---------|----|----|----|----|----|----|----|----|----|
|         | tp | fp | fn | tp | fp | fn | tp | fp | fn |
| 1.00    | 0  | 0  | 3  | 0  | 0  | 0  | 0  | 0  | 0  |
| 0.99    | 1  | 0  | 2  | 0  | 0  | 0  | 0  | 0  | 0  |
| 0.96    | 3  | 0  | 0  | 0  | 0  | 0  | 0  | 0  | 0  |
| 0.91    | 3  | 2  | 0  | 0  | 5  | 0  | 0  | 5  | 0  |
| 0.76    | 3  | 2  | 0  | 0  | 18 | 0  | 0  | 18 | 0  |
| 0.46    | 3  | 3  | 0  | 0  | 33 | 0  | 0  | 33 | 0  |
| 0.00    | 3  | 5  | 0  | 0  | 56 | 0  | 0  | 56 | 0  |

## Proxies selected by the Multiple Sources method

Model 1

- (GT) covid
- (GT) covid-19
- (GT) quarantine
- (GT) Wheeze
- (GT) Anxiety
- (GT) Cough

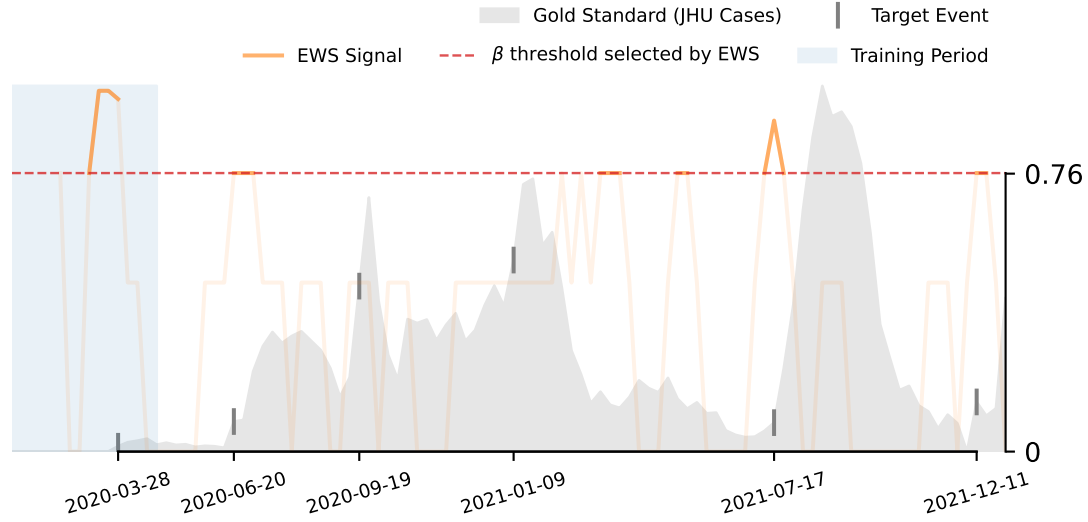

Model 2

- (GT) covid
- (GT) covid-19
- (GT) Cough

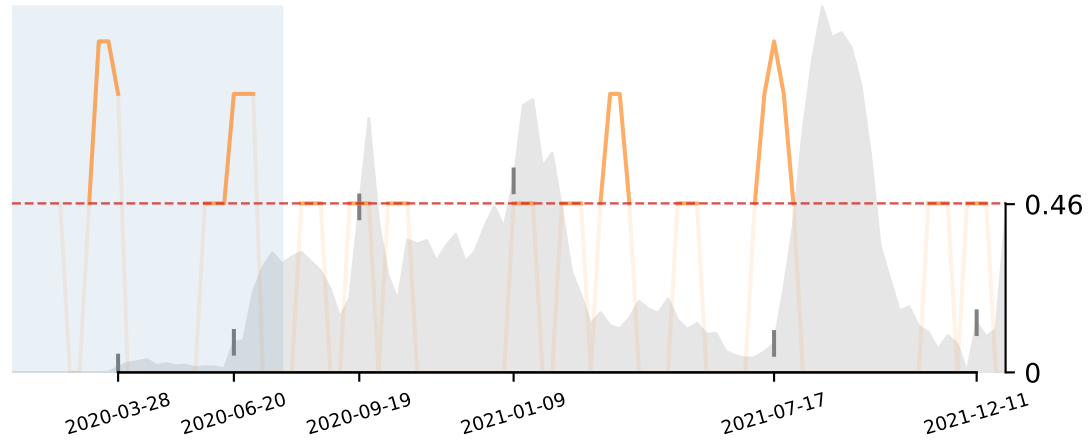

Model 3

- (GT) covid-19
- (GT) Cough
- (GT) covid
- (GT) covid symptoms
- (GT) Chest pain
- (GT) Fever

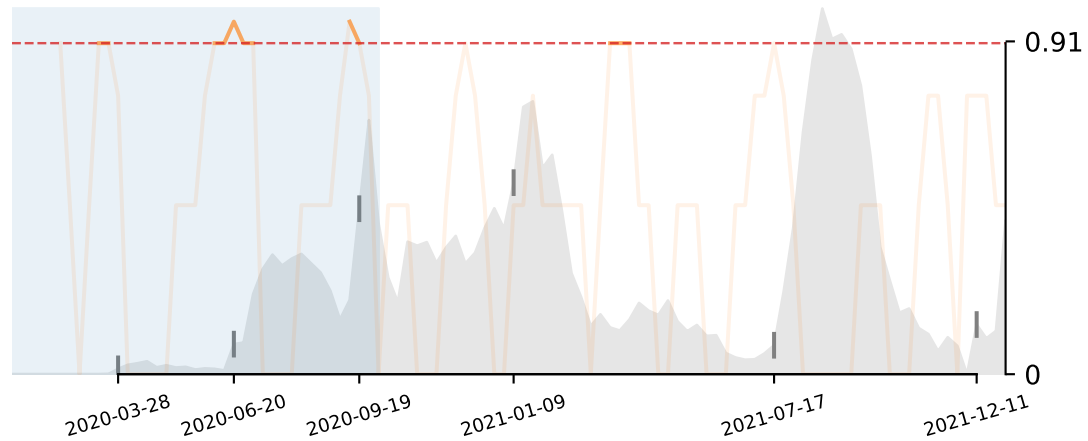

## Performance as a function of $\beta$

| $\beta$ | Training |    |    | Out of sample |    |    |
|---------|----------|----|----|---------------|----|----|
|         | tp       | fp | fn | tp            | fp | fn |
| 1.00    | 0        | 0  | 1  | 0             | 0  | 5  |
| 0.99    | 0        | 0  | 1  | 0             | 0  | 5  |
| 0.96    | 1        | 0  | 0  | 0             | 0  | 5  |
| 0.91    | 1        | 0  | 0  | 1             | 0  | 4  |
| 0.76    | 1        | 0  | 0  | 3             | 11 | 2  |
| 0.46    | 1        | 1  | 0  | 5             | 32 | 0  |
| 0.00    | 1        | 3  | 0  | 5             | 53 | 0  |

| $\beta$ | tp fp fn |   |   | tp fp fn |    |   |
|---------|----------|---|---|----------|----|---|
|         | 0.91     | 0 | 0 | 2        | 1  | 0 |
| 0.76    | 1        | 0 | 1 | 1        | 3  | 3 |
| 0.46    | 2        | 2 | 0 | 4        | 19 | 0 |
| 0.00    | 2        | 3 | 0 | 4        | 47 | 0 |

| $\beta$ | tp fp fn |   |   | tp fp fn |    |   |
|---------|----------|---|---|----------|----|---|
|         | 1.00     | 0 | 0 | 3        | 0  | 0 |
| 0.99    | 0        | 0 | 3 | 0        | 0  | 3 |
| 0.96    | 0        | 0 | 3 | 0        | 0  | 3 |
| 0.91    | 2        | 0 | 1 | 2        | 3  | 1 |
| 0.76    | 3        | 3 | 0 | 3        | 6  | 0 |
| 0.46    | 3        | 4 | 0 | 3        | 28 | 0 |
| 0.00    | 3        | 9 | 0 | 3        | 44 | 0 |

## Proxies selected by the Multiple Sources method

Model 1

- (GT) covid
- (GT) how long does covid last
- (GT) covid-19
- (GT) chest pain
- (GT) covid symptoms
- (GT) chest tightness

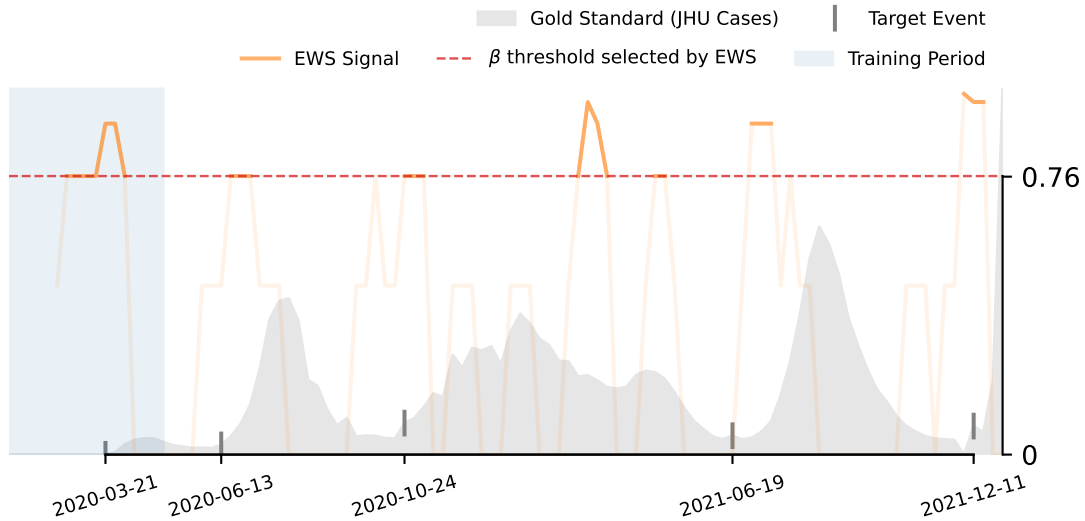

## Performance as a function of $\beta$

| $\beta$ | Training |    |    | Out of sample |    |    |
|---------|----------|----|----|---------------|----|----|
|         | tp       | fp | fn | tp            | fp | fn |
| 1.00    | 0        | 0  | 1  | 0             | 0  | 4  |
| 0.99    | 0        | 0  | 1  | 1             | 0  | 3  |
| 0.96    | 0        | 0  | 1  | 1             | 2  | 3  |
| 0.91    | 0        | 0  | 1  | 1             | 6  | 2  |
| 0.76    | 1        | 1  | 0  | 2             | 16 | 0  |
| 0.46    | 1        | 2  | 0  | 4             | 32 | 0  |
| 0.00    | 1        | 3  | 0  | 4             | 60 | 0  |

Model 2

- (GT) covid symptoms
- (GT) covid-19 who
- (GT) Ageusia
- (GT) Diarrhea
- (GT) Otitis

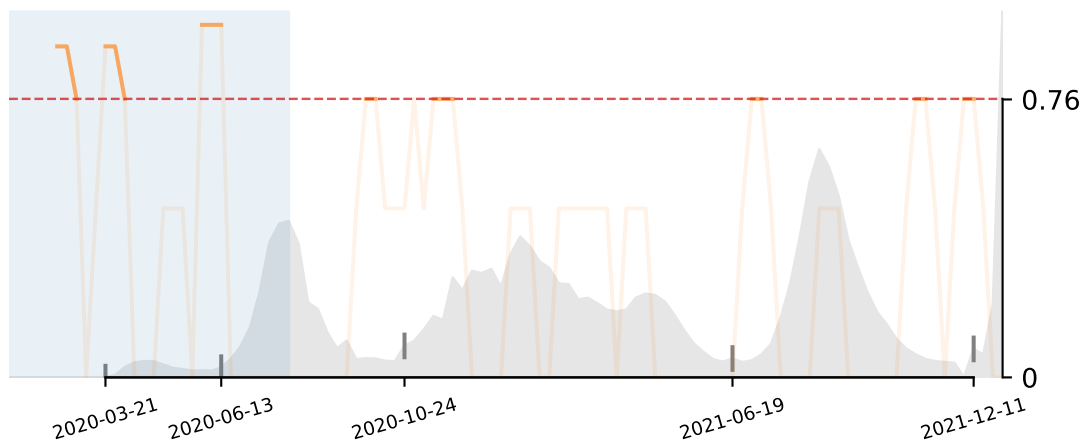

| $\beta$ | tp fp fn |   |   | tp fp fn |    |   |
|---------|----------|---|---|----------|----|---|
|         | 0.99     | 0 | 0 | 2        | 0  | 0 |
| 0.96    | 0        | 0 | 2 | 0        | 0  | 3 |
| 0.91    | 1        | 0 | 1 | 0        | 0  | 3 |
| 0.76    | 2        | 2 | 0 | 2        | 6  | 0 |
| 0.46    | 2        | 3 | 0 | 2        | 27 | 0 |
| 0.00    | 2        | 5 | 0 | 3        | 53 | 0 |

Model 3

- (GT) covid symptoms
- (GT) Ageusia
- (GT) covid-19 who
- (GT) chest pain
- (GT) covid
- (GT) covid-19

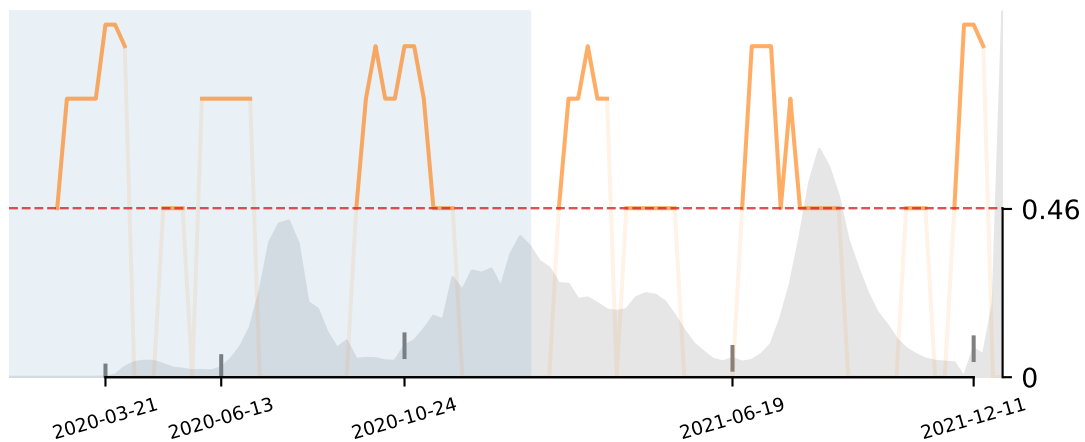

| $\beta$ | tp fp fn |    |   | tp fp fn |    |   |
|---------|----------|----|---|----------|----|---|
|         | 1.00     | 0  | 0 | 3        | 0  | 0 |
| 0.99    | 0        | 0  | 3 | 0        | 0  | 2 |
| 0.96    | 0        | 0  | 3 | 1        | 0  | 1 |
| 0.91    | 1        | 1  | 2 | 1        | 5  | 0 |
| 0.76    | 2        | 3  | 1 | 1        | 10 | 0 |
| 0.46    | 3        | 7  | 0 | 2        | 24 | 0 |
| 0.00    | 3        | 14 | 0 | 2        | 35 | 0 |

## Proxies selected by the Multiple Sources method

Model 1

- (GT) covid
- (GT) covid-19
- (GT) covid symptoms
- (GT) fever
- (GT) Ageusia
- (GT) Anosmia

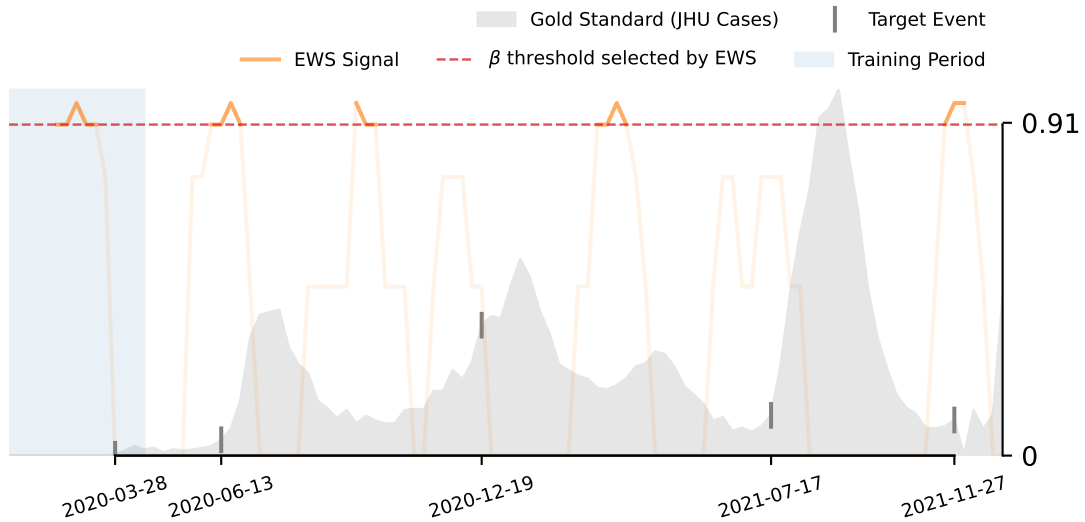

## Performance as a function of $\beta$

| $\beta$ | Training |    |    | Out of sample |    |    |
|---------|----------|----|----|---------------|----|----|
|         | tp       | fp | fn | tp            | fp | fn |
| 1.00    | 0        | 0  | 1  | 0             | 0  | 4  |
| 0.99    | 0        | 0  | 1  | 0             | 0  | 4  |
| 0.96    | 0        | 0  | 1  | 1             | 4  | 2  |
| 0.91    | 1        | 0  | 0  | 2             | 10 | 2  |
| 0.76    | 1        | 2  | 0  | 4             | 13 | 0  |
| 0.46    | 1        | 2  | 0  | 4             | 28 | 0  |
| 0.00    | 1        | 2  | 0  | 4             | 61 | 0  |

Model 2

- (GT) covid-19
- (GT) covid symptoms
- (GT) fever
- (GT) Ageusia
- (GT) Anosmia
- (GT) Asphyxia

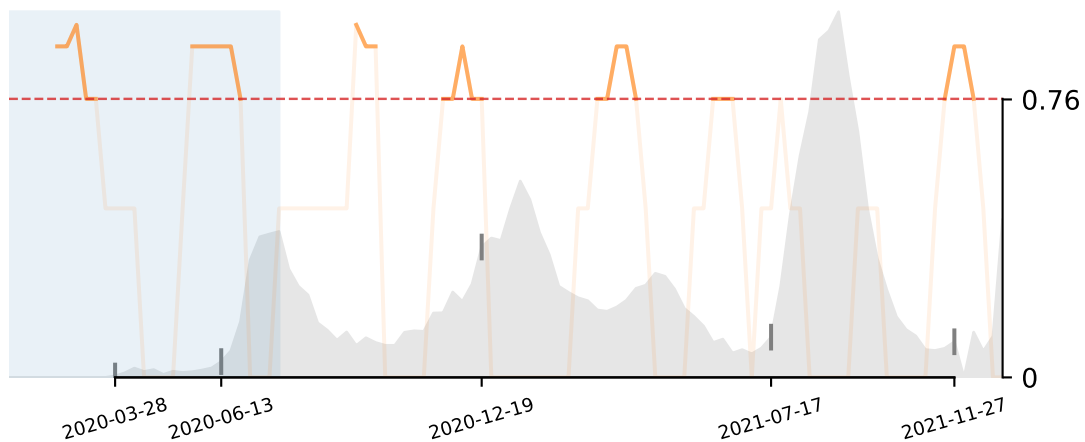

| $\beta$ | tp fp fn |   |   | tp fp fn |    |   |
|---------|----------|---|---|----------|----|---|
|         | 1.00     | 0 | 0 | 2        | 0  | 0 |
| 0.99    | 0        | 0 | 2 | 0        | 0  | 3 |
| 0.96    | 0        | 0 | 2 | 0        | 1  | 3 |
| 0.91    | 1        | 0 | 1 | 2        | 6  | 1 |
| 0.76    | 2        | 3 | 0 | 3        | 11 | 0 |
| 0.46    | 2        | 4 | 0 | 3        | 29 | 0 |
| 0.00    | 2        | 7 | 0 | 3        | 54 | 0 |

Model 3

- (GT) covid-19
- (GT) covid symptoms
- (GT) fever
- (GT) Asphyxia
- (GT) nose bleed
- (GT) loss taste

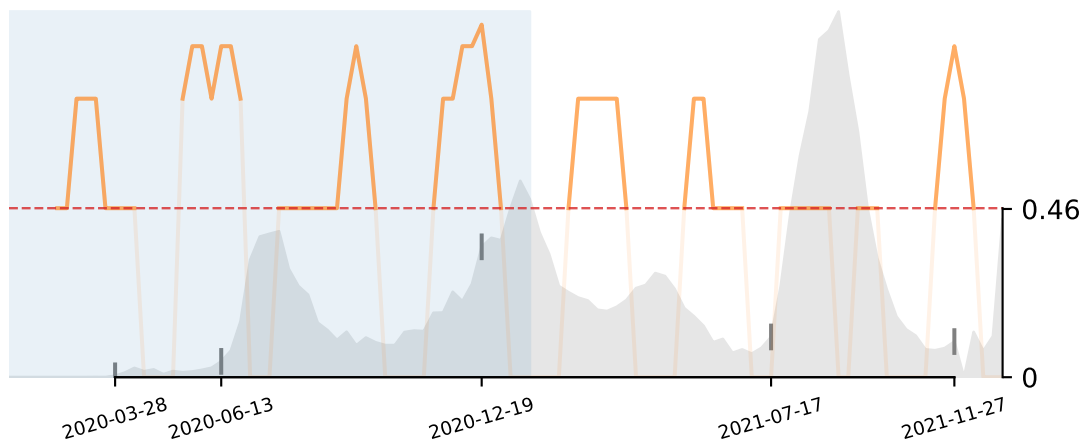

| $\beta$ | tp fp fn |    |   | tp fp fn |    |   |
|---------|----------|----|---|----------|----|---|
|         | 1.00     | 0  | 0 | 3        | 0  | 0 |
| 0.99    | 0        | 0  | 3 | 0        | 0  | 2 |
| 0.96    | 0        | 0  | 3 | 0        | 0  | 2 |
| 0.91    | 1        | 0  | 2 | 1        | 0  | 1 |
| 0.76    | 2        | 2  | 1 | 1        | 8  | 1 |
| 0.46    | 3        | 6  | 0 | 2        | 21 | 0 |
| 0.00    | 3        | 20 | 0 | 2        | 35 | 0 |

## Proxies selected by the Multiple Sources method

Model 1

- (GT) covid
- (GT) covid-19
- (GT) chest pain
- (GT) covid symptoms
- (GT) quarantine
- (GT) covid-19 who

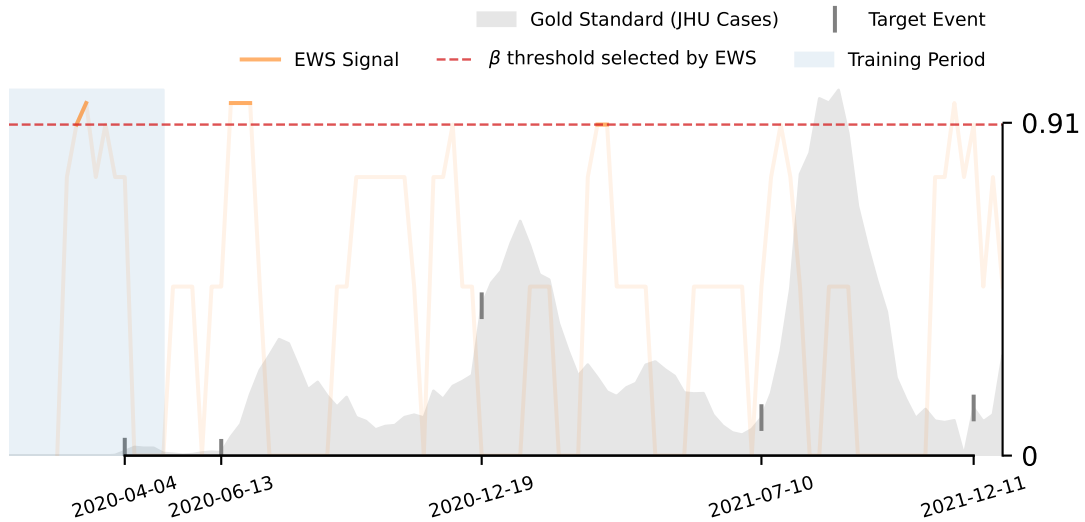

Model 2

- (GT) chest pain
- (GT) covid-19 who
- (GT) Cardiac arrest

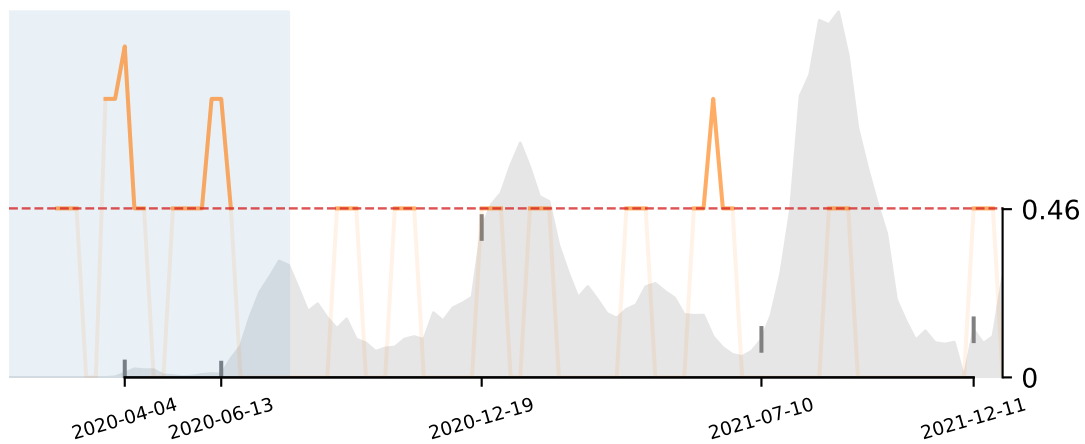

Model 3

- (GT) Cardiac arrest
- (GT) how long does covid last
- (GT) covid
- (GT) covid-19 who
- (GT) covid-19
- (GT) chest pain

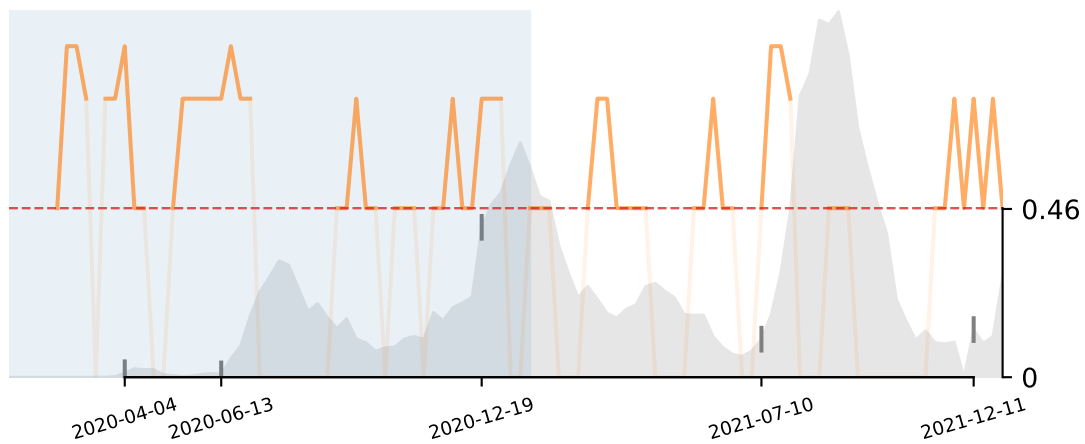

## Performance as a function of $\beta$

| $\beta$ | Training |    |    | Out of sample |    |    |
|---------|----------|----|----|---------------|----|----|
|         | tp       | fp | fn | tp            | fp | fn |
| 1.00    | 0        | 0  | 1  | 0             | 0  | 4  |
| 0.99    | 0        | 0  | 1  | 0             | 0  | 4  |
| 0.96    | 0        | 0  | 1  | 1             | 3  | 2  |
| 0.91    | 1        | 0  | 0  | 2             | 6  | 0  |
| 0.76    | 1        | 1  | 0  | 2             | 16 | 0  |
| 0.46    | 1        | 2  | 0  | 4             | 34 | 0  |
| 0.00    | 1        | 2  | 0  | 4             | 60 | 0  |

| $\beta$ | tp fp fn |   |   | tp fp fn |    |   |
|---------|----------|---|---|----------|----|---|
|         | 0.91     | 0 | 0 | 2        | 0  | 0 |
| 0.76    | 1        | 0 | 1 | 1        | 0  | 2 |
| 0.46    | 2        | 0 | 0 | 3        | 20 | 0 |
| 0.00    | 2        | 7 | 0 | 3        | 53 | 0 |

| $\beta$ | tp fp fn |    |   | tp fp fn |    |   |
|---------|----------|----|---|----------|----|---|
|         | 1.00     | 0  | 0 | 3        | 0  | 0 |
| 0.99    | 0        | 0  | 3 | 0        | 0  | 2 |
| 0.96    | 0        | 0  | 3 | 0        | 0  | 2 |
| 0.91    | 0        | 0  | 3 | 0        | 2  | 1 |
| 0.76    | 1        | 3  | 2 | 2        | 6  | 0 |
| 0.46    | 3        | 8  | 0 | 2        | 19 | 0 |
| 0.00    | 3        | 21 | 0 | 2        | 35 | 0 |

## Proxies selected by the Multiple Sources method

Model 1

- (GT) covid
- (GT) covid-19
- (GT) chest pain
- (GT) covid symptoms
- (GT) quarantine
- (GT) nose bleed

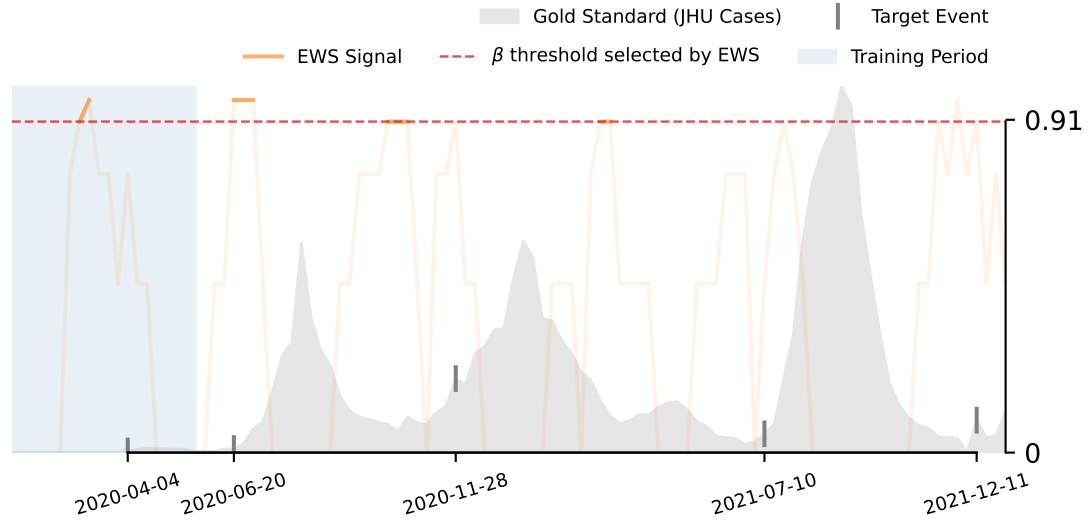

Model 2

- (GT) covid
- (GT) covid-19
- (GT) chest pain
- (GT) covid symptoms
- (GT) covid-19 who
- (GT) Dizziness

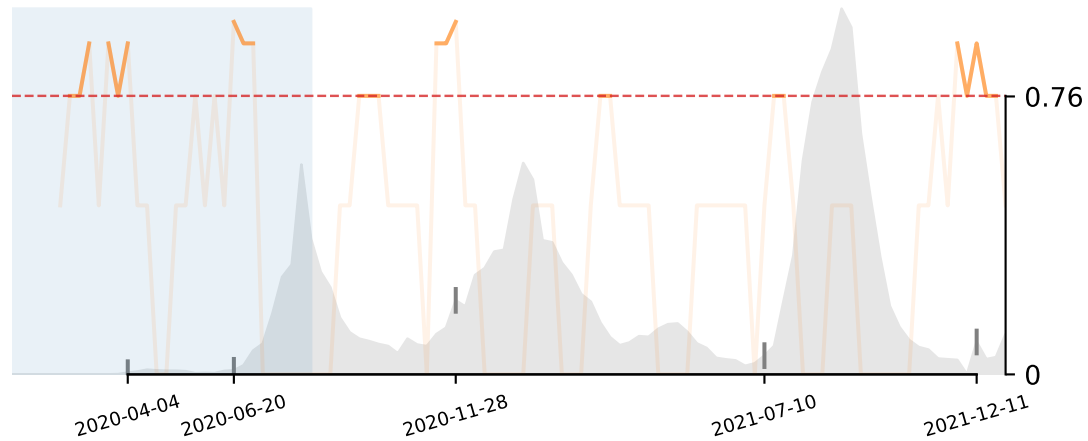

Model 3

- (GT) covid
- (GT) covid-19
- (GT) chest pain
- (GT) covid symptoms
- (GT) Dizziness
- (GT) covid-19 who

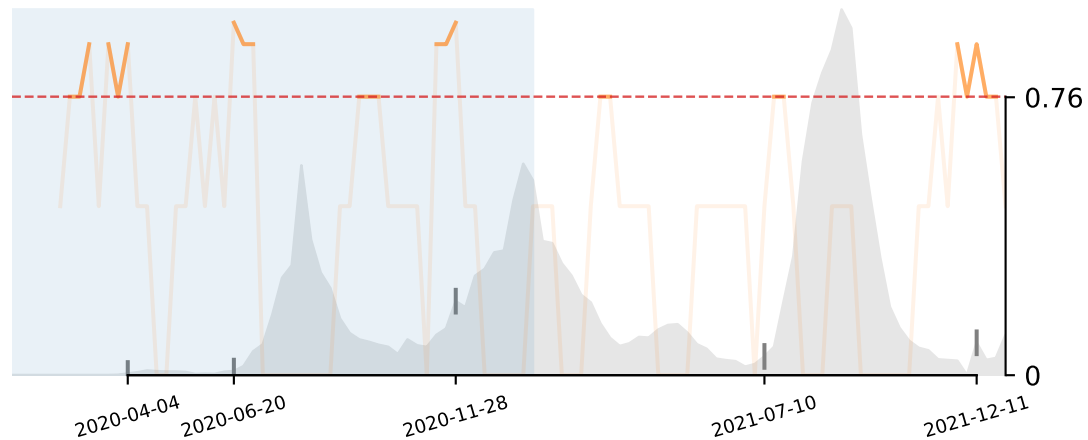

## Performance as a function of $\beta$

| $\beta$ | Training |    |    | Out of sample |    |    |
|---------|----------|----|----|---------------|----|----|
|         | tp       | fp | fn | tp            | fp | fn |
| 1.00    | 0        | 0  | 1  | 0             | 0  | 4  |
| 0.99    | 0        | 0  | 1  | 0             | 0  | 4  |
| 0.96    | 0        | 0  | 1  | 2             | 2  | 2  |
| 0.91    | 1        | 0  | 0  | 3             | 6  | 0  |
| 0.76    | 1        | 1  | 0  | 4             | 13 | 0  |
| 0.46    | 1        | 2  | 0  | 4             | 29 | 0  |
| 0.00    | 1        | 4  | 0  | 4             | 59 | 0  |

| $\beta$ | tp fp fn |   |   | tp fp fn |    |   |
|---------|----------|---|---|----------|----|---|
|         | 1.00     | 0 | 0 | 2        | 0  | 0 |
| 0.99    | 0        | 0 | 2 | 0        | 0  | 3 |
| 0.96    | 0        | 0 | 2 | 1        | 0  | 2 |
| 0.91    | 1        | 0 | 1 | 2        | 0  | 1 |
| 0.76    | 2        | 2 | 0 | 2        | 9  | 0 |
| 0.46    | 2        | 4 | 0 | 3        | 28 | 0 |
| 0.00    | 2        | 9 | 0 | 3        | 51 | 0 |

| $\beta$ | tp fp fn |    |   | tp fp fn |    |   |
|---------|----------|----|---|----------|----|---|
|         | 1.00     | 0  | 0 | 3        | 0  | 0 |
| 0.99    | 0        | 0  | 3 | 0        | 0  | 2 |
| 0.96    | 0        | 0  | 3 | 0        | 0  | 2 |
| 0.91    | 2        | 0  | 1 | 1        | 0  | 1 |
| 0.76    | 3        | 2  | 0 | 1        | 6  | 0 |
| 0.46    | 3        | 7  | 0 | 2        | 19 | 0 |
| 0.00    | 3        | 20 | 0 | 2        | 35 | 0 |

## Proxies selected by the Multiple Sources method

Model 1

- (GT) covid
- (GT) how long does covid last
- (GT) covid-19
- (GT) chest pain
- (GT) covid symptoms
- (GT) chest tightness

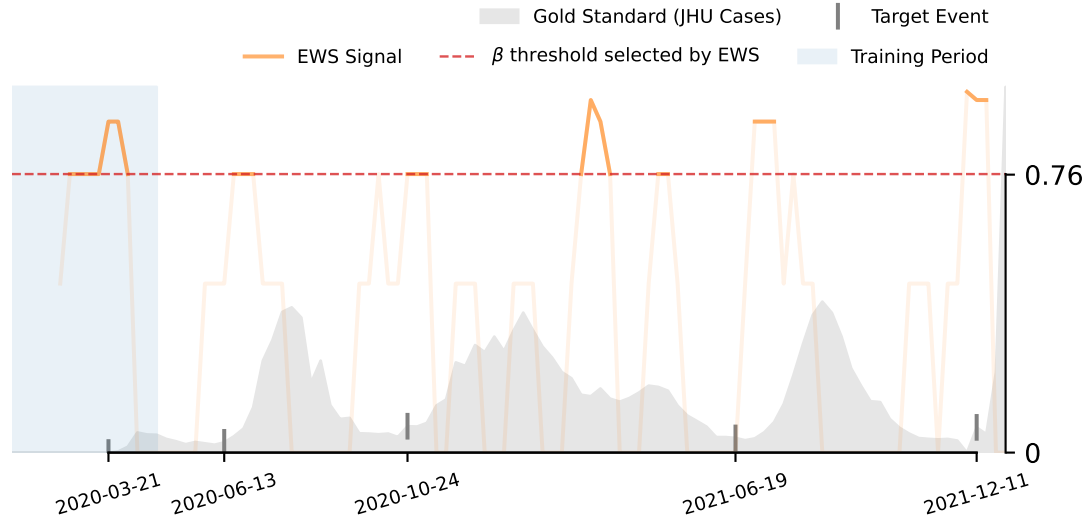

Model 2

- (GT) covid symptoms
- (GT) covid-19 who
- (GT) Ageusia
- (GT) Anosmia
- (GT) Chest pain
- (GT) Fatigue

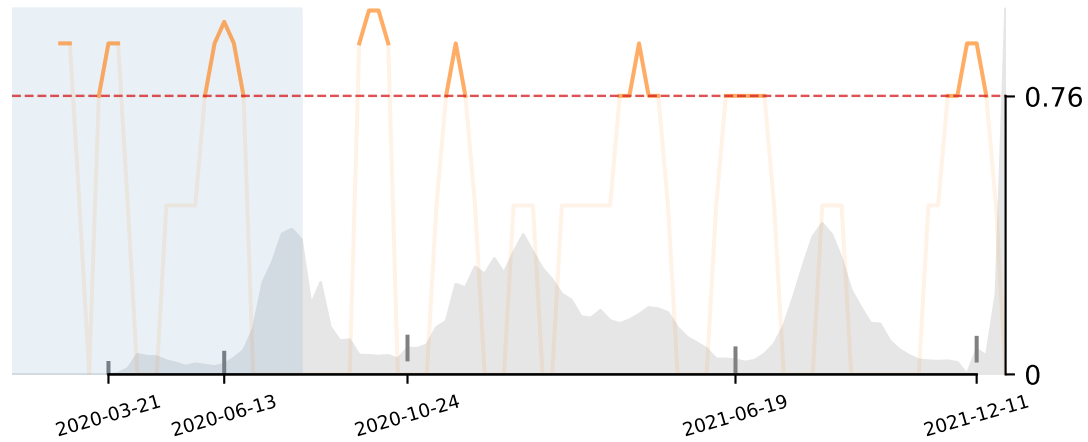

Model 3

- (GT) covid symptoms
- (GT) Ageusia
- (GT) Anosmia
- (GT) covid-19 who
- (GT) Chest pain
- (GT) Fatigue

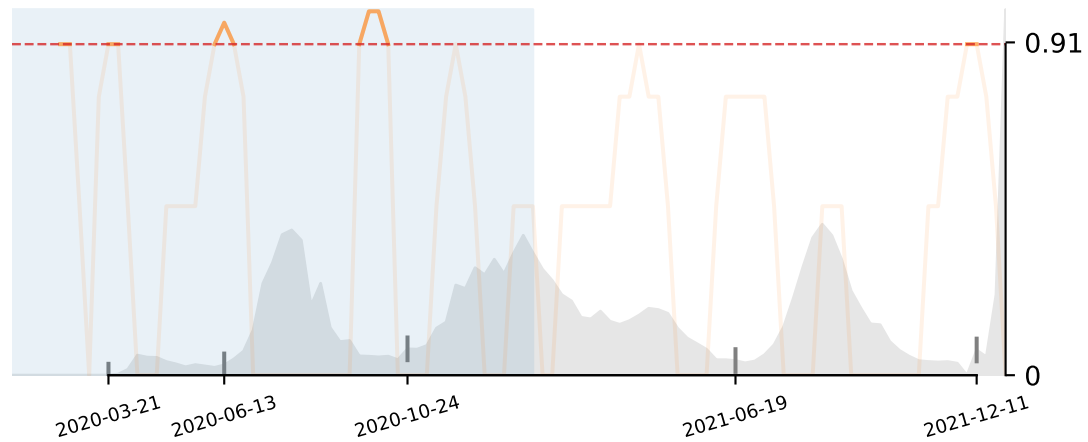

## Performance as a function of $\beta$

| $\beta$ | Training |    |    | Out of sample |    |    |
|---------|----------|----|----|---------------|----|----|
|         | tp       | fp | fn | tp            | fp | fn |
| 1.00    | 0        | 0  | 1  | 0             | 0  | 4  |
| 0.99    | 0        | 0  | 1  | 1             | 0  | 3  |
| 0.96    | 0        | 0  | 1  | 1             | 2  | 3  |
| 0.91    | 0        | 0  | 1  | 1             | 6  | 2  |
| 0.76    | 1        | 1  | 0  | 2             | 16 | 0  |
| 0.46    | 1        | 2  | 0  | 4             | 32 | 0  |
| 0.00    | 1        | 3  | 0  | 4             | 60 | 0  |

| $\beta$ | tp |    |    | fp |    |    | fn |    |    |
|---------|----|----|----|----|----|----|----|----|----|
|         | tp | fp | fn | tp | fp | fn | tp | fp | fn |
| 1.00    | 0  | 0  | 2  | 1  | 0  | 2  | 1  | 0  | 2  |
| 0.99    | 0  | 0  | 2  | 1  | 0  | 2  | 1  | 0  | 2  |
| 0.96    | 0  | 0  | 2  | 1  | 0  | 2  | 1  | 0  | 2  |
| 0.91    | 1  | 0  | 1  | 2  | 2  | 1  | 2  | 2  | 1  |
| 0.76    | 2  | 3  | 0  | 3  | 12 | 0  | 3  | 12 | 0  |
| 0.46    | 2  | 4  | 0  | 3  | 29 | 0  | 3  | 29 | 0  |
| 0.00    | 2  | 7  | 0  | 3  | 52 | 0  | 3  | 52 | 0  |

| $\beta$ | tp |    |    | fp |    |    | fn |    |    |
|---------|----|----|----|----|----|----|----|----|----|
|         | tp | fp | fn | tp | fp | fn | tp | fp | fn |
| 1.00    | 0  | 0  | 3  | 0  | 0  | 2  | 0  | 0  | 2  |
| 0.99    | 1  | 0  | 2  | 0  | 0  | 2  | 0  | 0  | 2  |
| 0.96    | 1  | 0  | 2  | 0  | 0  | 2  | 0  | 0  | 2  |
| 0.91    | 2  | 0  | 1  | 1  | 1  | 1  | 1  | 1  | 1  |
| 0.76    | 3  | 5  | 0  | 2  | 9  | 0  | 2  | 9  | 0  |
| 0.46    | 3  | 8  | 0  | 2  | 21 | 0  | 2  | 21 | 0  |
| 0.00    | 3  | 16 | 0  | 2  | 35 | 0  | 2  | 35 | 0  |

## Proxies selected by the Multiple Sources method

Model 1

- (GT) covid
- (GT) covid-19
- (GT) chest pain
- (GT) covid symptoms
- (GT) quarantine
- (GT) covid-19 who

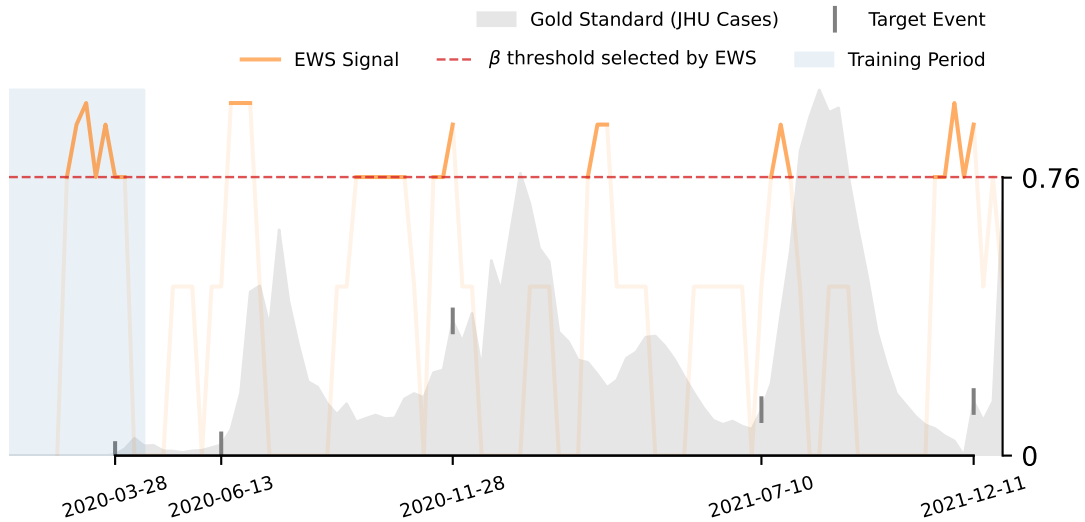

Model 2

- (GT) chest pain
- (GT) covid-19 who
- (GT) Ageusia
- (GT) Anosmia
- (GT) Hyperventilation

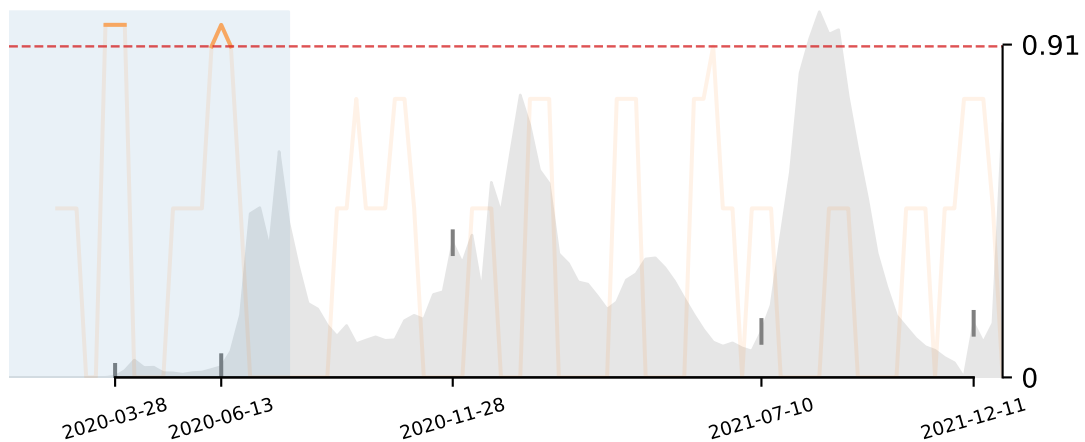

Model 3

- (GT) chest pain
- (GT) covid
- (GT) covid-19 who
- (GT) Ageusia
- (GT) Anosmia
- (GT) covid-19

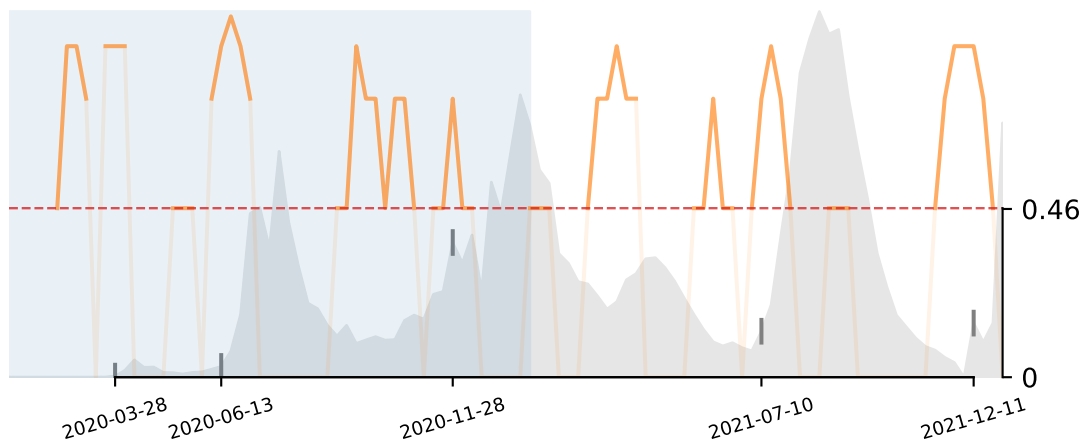

## Performance as a function of $\beta$

| $\beta$ | Training |    |    | Out of sample |    |    |
|---------|----------|----|----|---------------|----|----|
|         | tp       | fp | fn | tp            | fp | fn |
| 1.00    | 0        | 0  | 1  | 0             | 0  | 4  |
| 0.99    | 0        | 0  | 1  | 0             | 0  | 4  |
| 0.96    | 0        | 0  | 1  | 1             | 3  | 2  |
| 0.91    | 1        | 0  | 0  | 2             | 6  | 0  |
| 0.76    | 1        | 0  | 0  | 2             | 14 | 0  |
| 0.46    | 1        | 2  | 0  | 4             | 33 | 0  |
| 0.00    | 1        | 2  | 0  | 4             | 61 | 0  |

| $\beta$ | tp |    |    | fp |    |    | fn |    |    |
|---------|----|----|----|----|----|----|----|----|----|
|         | tp | fp | fn | tp | fp | fn | tp | fp | fn |
| 0.99    | 0  | 0  | 2  | 0  | 0  | 3  | 0  | 0  | 3  |
| 0.96    | 0  | 0  | 2  | 0  | 0  | 3  | 0  | 0  | 3  |
| 0.91    | 2  | 1  | 0  | 1  | 0  | 2  | 1  | 0  | 2  |
| 0.76    | 2  | 2  | 0  | 3  | 9  | 0  | 3  | 9  | 0  |
| 0.46    | 2  | 2  | 0  | 3  | 23 | 0  | 3  | 23 | 0  |
| 0.00    | 2  | 6  | 0  | 3  | 53 | 0  | 3  | 53 | 0  |

| $\beta$ | tp |    |    | fp |    |    | fn |    |    |
|---------|----|----|----|----|----|----|----|----|----|
|         | tp | fp | fn | tp | fp | fn | tp | fp | fn |
| 1.00    | 0  | 0  | 3  | 0  | 0  | 2  | 0  | 0  | 2  |
| 0.99    | 0  | 0  | 3  | 0  | 0  | 2  | 0  | 0  | 2  |
| 0.96    | 0  | 1  | 3  | 0  | 0  | 2  | 0  | 0  | 2  |
| 0.91    | 0  | 1  | 3  | 1  | 2  | 0  | 1  | 2  | 0  |
| 0.76    | 2  | 5  | 1  | 2  | 8  | 0  | 2  | 8  | 0  |
| 0.46    | 3  | 10 | 0  | 2  | 17 | 0  | 2  | 17 | 0  |
| 0.00    | 3  | 18 | 0  | 2  | 35 | 0  | 2  | 35 | 0  |



## Proxies selected by the Multiple Sources method

Model 1

- (GT) covid
- (GT) covid-19
- (GT) chest pain
- (GT) covid symptoms
- (GT) chest tightness
- (GT) quarantine

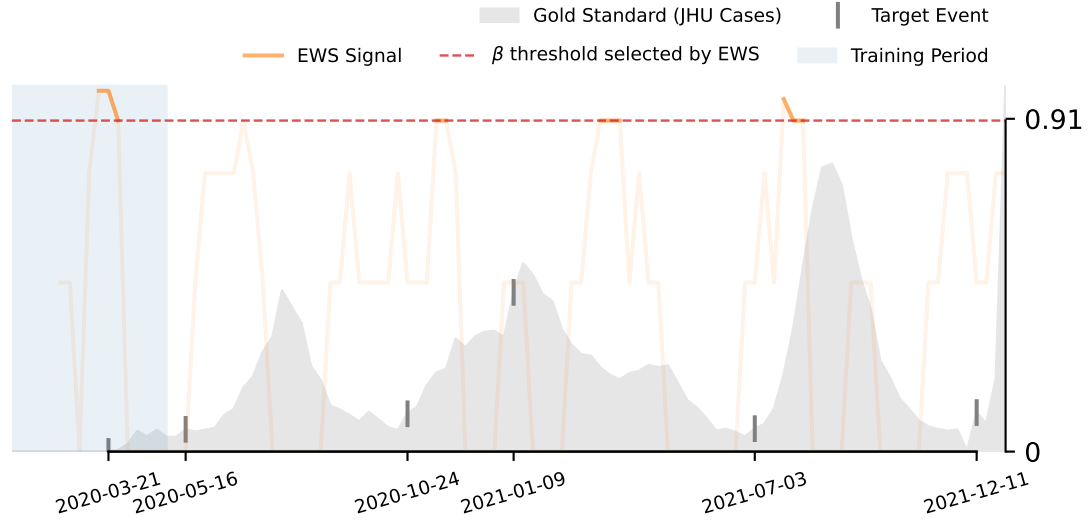

Model 2

- (GT) fever
- (GT) Chronic pain
- (GT) Fatigue
- Apple Mobility (driving)
- Apple Mobility (walking)
- Apple Mobility (transit)

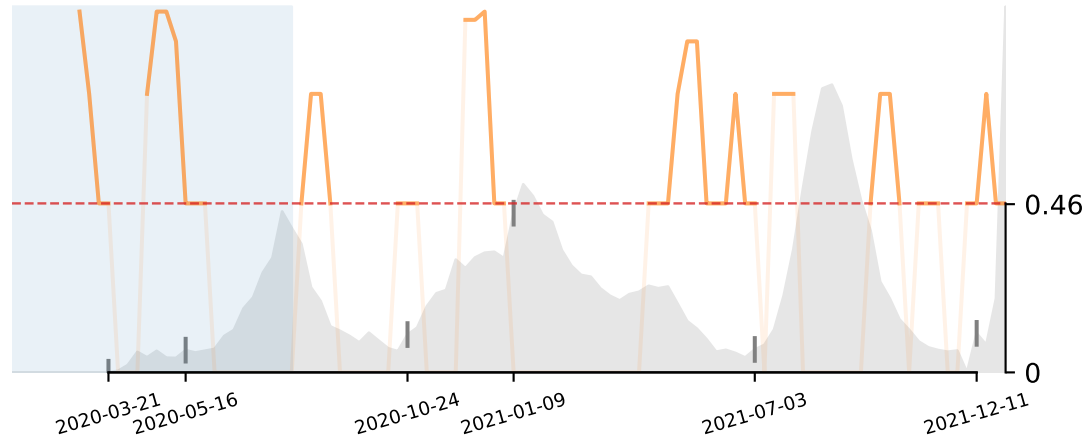

Model 3

- Apple Mobility (walking)
- (GT) covid-19
- (GT) fever
- (GT) Acute bronchitis
- (GT) Ageusia
- (GT) Anosmia

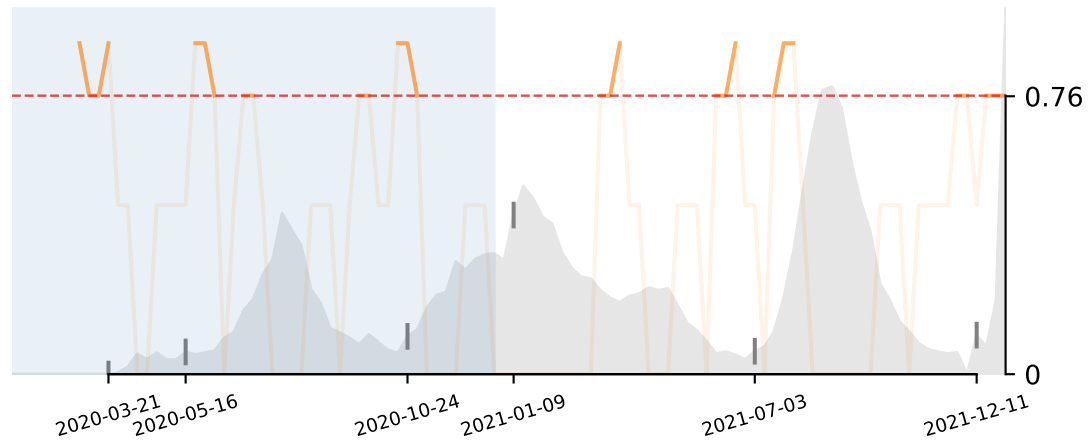

## Performance as a function of $\beta$

| $\beta$ | Training |    |    | Out of sample |    |    |
|---------|----------|----|----|---------------|----|----|
|         | tp       | fp | fn | tp            | fp | fn |
| 1.00    | 0        | 0  | 1  | 0             | 0  | 5  |
| 0.99    | 0        | 0  | 1  | 0             | 0  | 5  |
| 0.96    | 1        | 0  | 0  | 0             | 1  | 5  |
| 0.91    | 1        | 0  | 0  | 0             | 9  | 5  |
| 0.76    | 1        | 1  | 0  | 3             | 19 | 0  |
| 0.46    | 1        | 1  | 0  | 4             | 36 | 0  |
| 0.00    | 1        | 2  | 0  | 5             | 57 | 0  |

| $\beta$ | tp fp fn |   |   | tp fp fn |    |   |
|---------|----------|---|---|----------|----|---|
|         | 1.00     | 0 | 0 | 2        | 0  | 0 |
| 0.99    | 0        | 0 | 2 | 1        | 0  | 3 |
| 0.96    | 2        | 0 | 0 | 1        | 0  | 3 |
| 0.91    | 2        | 0 | 0 | 2        | 1  | 2 |
| 0.76    | 2        | 0 | 0 | 2        | 10 | 1 |
| 0.46    | 2        | 0 | 0 | 4        | 20 | 0 |
| 0.00    | 2        | 2 | 0 | 4        | 46 | 0 |

| $\beta$ | tp fp fn |    |   | tp fp fn |    |   |
|---------|----------|----|---|----------|----|---|
|         | 1.00     | 0  | 0 | 3        | 0  | 0 |
| 0.99    | 0        | 0  | 3 | 0        | 0  | 3 |
| 0.96    | 0        | 0  | 3 | 0        | 0  | 3 |
| 0.91    | 0        | 0  | 3 | 1        | 3  | 2 |
| 0.76    | 2        | 2  | 1 | 2        | 9  | 1 |
| 0.46    | 2        | 7  | 1 | 2        | 17 | 1 |
| 0.00    | 3        | 18 | 0 | 3        | 37 | 0 |

## Proxies selected by the Multiple Sources method

Model 1

- (GT) covid
- (GT) covid-19
- (GT) covid symptoms
- (GT) fever
- (GT) Acute bronchitis
- (GT) Anosmia

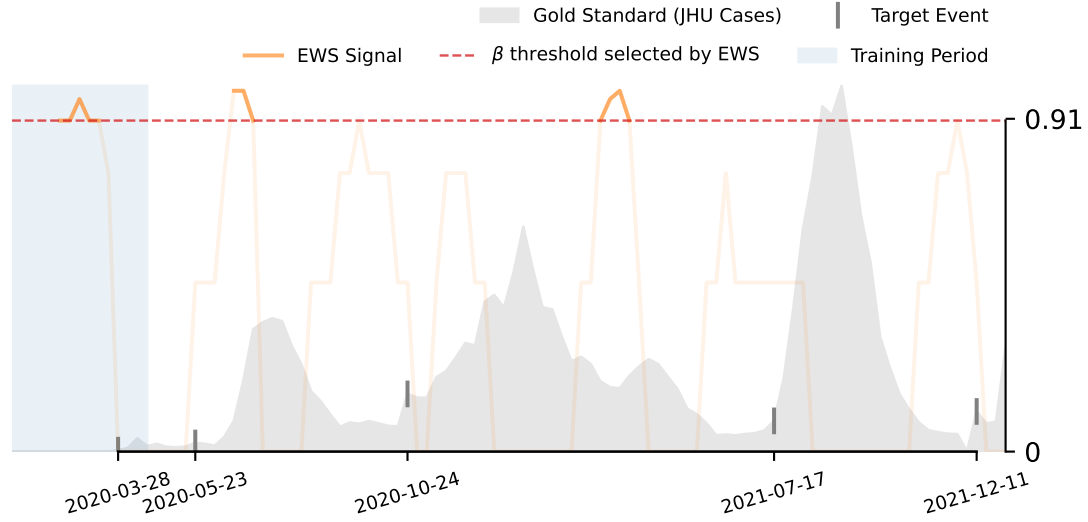

## Performance as a function of $\beta$

| $\beta$ | Training |    |    | Out of sample |    |    |
|---------|----------|----|----|---------------|----|----|
|         | tp       | fp | fn | tp            | fp | fn |
| 1.00    | 0        | 0  | 1  | 0             | 0  | 4  |
| 0.99    | 0        | 0  | 1  | 0             | 3  | 4  |
| 0.96    | 0        | 0  | 1  | 0             | 4  | 4  |
| 0.91    | 1        | 0  | 0  | 2             | 7  | 2  |
| 0.76    | 1        | 2  | 0  | 3             | 12 | 1  |
| 0.46    | 1        | 2  | 0  | 4             | 27 | 0  |
| 0.00    | 1        | 2  | 0  | 4             | 63 | 0  |

Model 2

- (GT) fever
- Apple Mobility (driving)
- Apple Mobility (walking)
- Apple Mobility (transit)
- (GT) Otitis

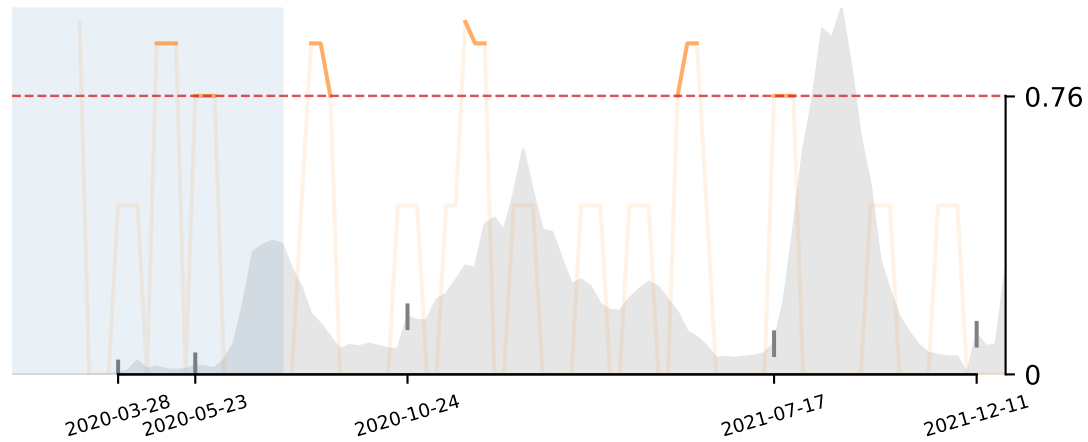

| $\beta$ | tp |    |    | fp |    |    | fn |    |    |
|---------|----|----|----|----|----|----|----|----|----|
|         | tp | fp | fn | tp | fp | fn | tp | fp | fn |
| 0.99    | 0  | 0  | 2  | 0  | 0  | 3  | 0  | 0  | 3  |
| 0.96    | 0  | 0  | 2  | 0  | 1  | 3  | 0  | 1  | 3  |
| 0.91    | 1  | 0  | 1  | 0  | 7  | 3  | 0  | 7  | 3  |
| 0.76    | 2  | 0  | 0  | 1  | 11 | 2  | 1  | 11 | 2  |
| 0.46    | 2  | 2  | 0  | 3  | 28 | 0  | 3  | 28 | 0  |
| 0.00    | 2  | 4  | 0  | 3  | 54 | 0  | 3  | 54 | 0  |

Model 3

- Apple Mobility (walking)
- (GT) covid
- (GT) Anosmia
- (GT) Dizziness
- (GT) Vertigo
- Apple Mobility (driving)

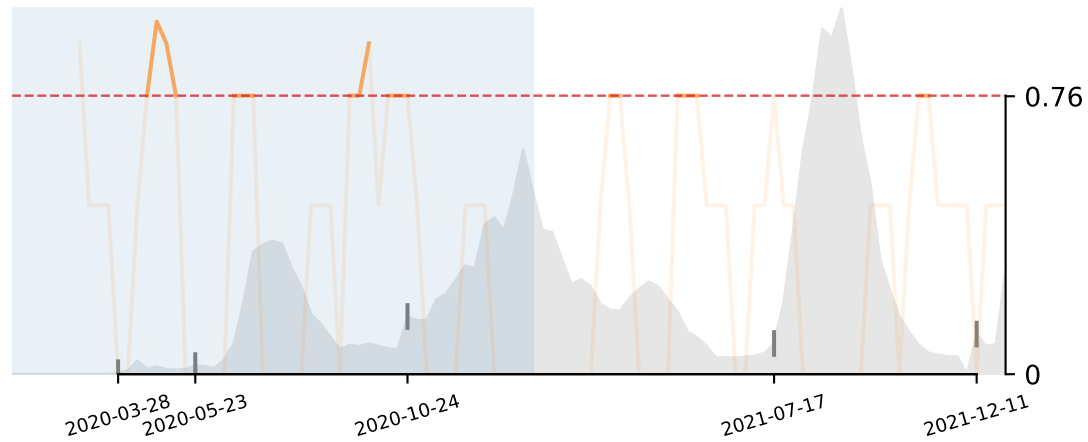

| $\beta$ | tp |    |    | fp |    |    | fn |    |    |
|---------|----|----|----|----|----|----|----|----|----|
|         | tp | fp | fn | tp | fp | fn | tp | fp | fn |
| 1.00    | 0  | 0  | 3  | 0  | 0  | 2  | 0  | 0  | 2  |
| 0.99    | 0  | 0  | 3  | 0  | 0  | 2  | 0  | 0  | 2  |
| 0.96    | 0  | 0  | 3  | 0  | 0  | 2  | 0  | 0  | 2  |
| 0.91    | 1  | 0  | 2  | 0  | 0  | 2  | 0  | 0  | 2  |
| 0.76    | 3  | 0  | 0  | 2  | 5  | 0  | 2  | 5  | 0  |
| 0.46    | 3  | 6  | 0  | 2  | 17 | 0  | 2  | 17 | 0  |
| 0.00    | 3  | 14 | 0  | 2  | 35 | 0  | 2  | 35 | 0  |

## Proxies selected by the Multiple Sources method

Model 1

- (GT) covid
- (GT) covid-19
- (GT) chest pain
- (GT) covid symptoms
- (GT) quarantine
- (GT) nose bleed

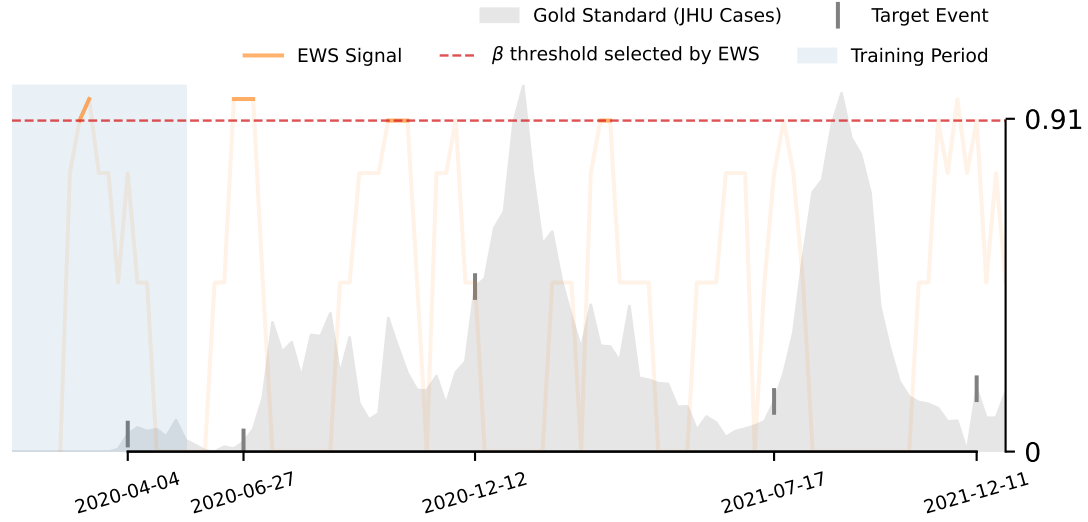

Model 2

- (GT) covid
- (GT) covid-19
- (GT) chest pain
- (GT) covid symptoms
- (GT) quarantine
- (GT) Otitis

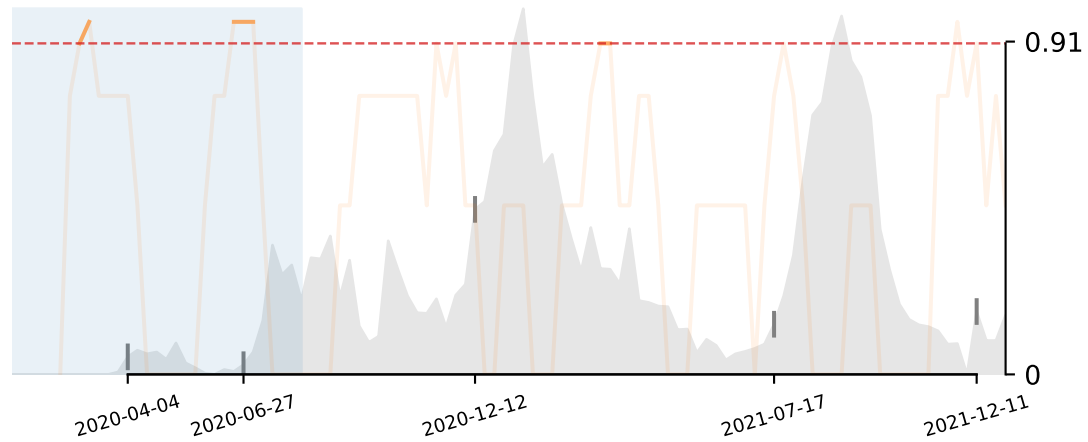

Model 3

- (GT) covid
- (GT) covid-19
- (GT) covid symptoms
- (GT) Otitis
- (GT) Pneumonia
- (GT) quarantine

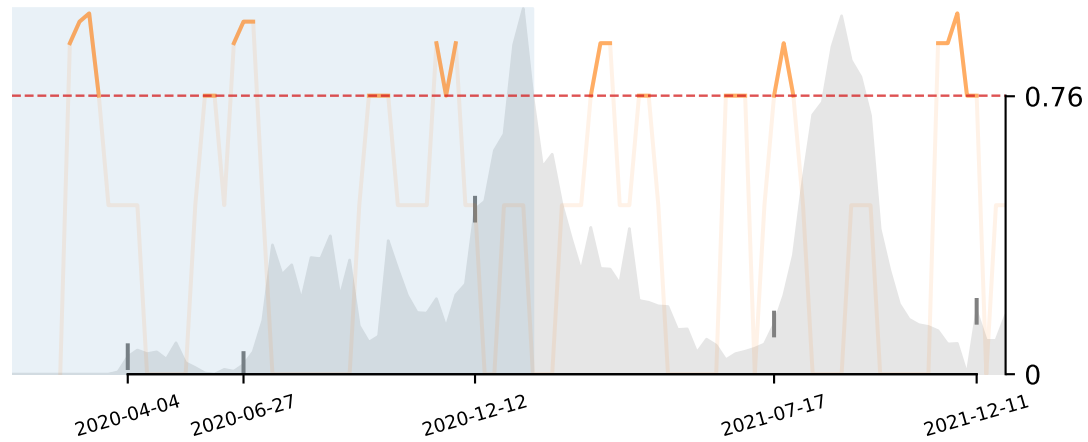

## Performance as a function of $\beta$

| $\beta$ | Training |    |    | Out of sample |    |    |
|---------|----------|----|----|---------------|----|----|
|         | tp       | fp | fn | tp            | fp | fn |
| 1.00    | 0        | 0  | 1  | 0             | 0  | 4  |
| 0.99    | 0        | 0  | 1  | 0             | 0  | 4  |
| 0.96    | 0        | 0  | 1  | 2             | 1  | 2  |
| 0.91    | 1        | 0  | 0  | 3             | 7  | 0  |
| 0.76    | 1        | 1  | 0  | 4             | 13 | 0  |
| 0.46    | 1        | 2  | 0  | 4             | 28 | 0  |
| 0.00    | 1        | 4  | 0  | 4             | 58 | 0  |

| $\beta$ | tp fp fn |   |   | tp fp fn |    |   |
|---------|----------|---|---|----------|----|---|
|         | 1.00     | 0 | 0 | 2        | 0  | 0 |
| 0.99    | 0        | 0 | 2 | 0        | 0  | 3 |
| 0.96    | 0        | 0 | 2 | 1        | 0  | 2 |
| 0.91    | 2        | 1 | 0 | 2        | 3  | 0 |
| 0.76    | 2        | 2 | 0 | 3        | 14 | 0 |
| 0.46    | 2        | 3 | 0 | 3        | 33 | 0 |
| 0.00    | 2        | 5 | 0 | 3        | 52 | 0 |

| $\beta$ | tp fp fn |    |   | tp fp fn |    |   |
|---------|----------|----|---|----------|----|---|
|         | 1.00     | 0  | 0 | 3        | 0  | 0 |
| 0.99    | 0        | 0  | 3 | 1        | 0  | 1 |
| 0.96    | 1        | 0  | 2 | 1        | 0  | 1 |
| 0.91    | 2        | 2  | 1 | 1        | 3  | 0 |
| 0.76    | 3        | 3  | 0 | 2        | 7  | 0 |
| 0.46    | 3        | 6  | 0 | 2        | 19 | 0 |
| 0.00    | 3        | 17 | 0 | 2        | 35 | 0 |

## Proxies selected by the Multiple Sources method

Model 1

- (GT) covid
- (GT) covid-19
- (GT) chest pain
- (GT) covid symptoms
- (GT) chest tightness
- (GT) covid-19 who

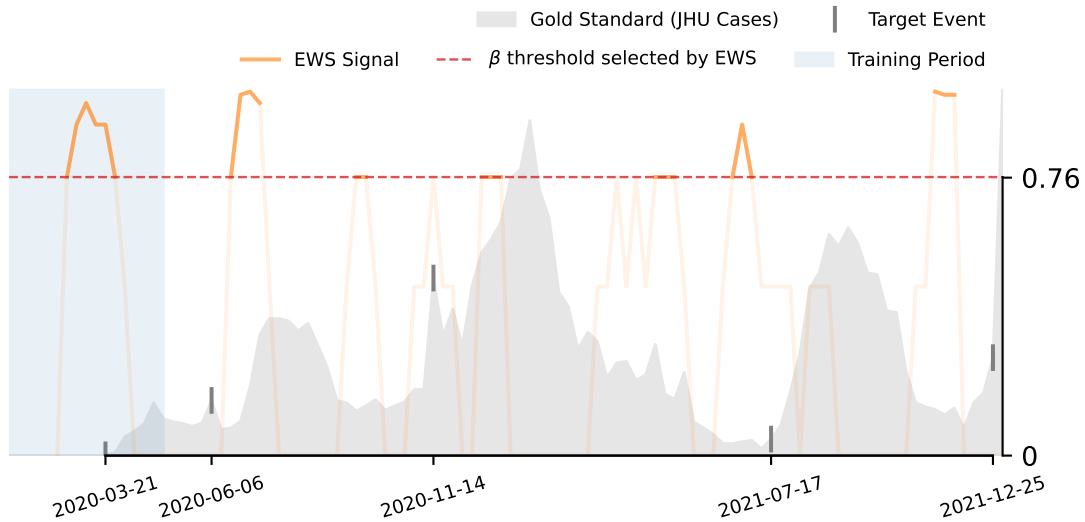

## Performance as a function of $\beta$

| $\beta$ | Training |    |    | Out of sample |    |    |
|---------|----------|----|----|---------------|----|----|
|         | tp       | fp | fn | tp            | fp | fn |
| 1.00    | 0        | 0  | 1  | 1             | 1  | 3  |
| 0.99    | 0        | 0  | 1  | 1             | 2  | 3  |
| 0.96    | 0        | 0  | 1  | 1             | 3  | 3  |
| 0.91    | 1        | 0  | 0  | 2             | 3  | 2  |
| 0.76    | 1        | 0  | 0  | 3             | 14 | 0  |
| 0.46    | 1        | 1  | 0  | 3             | 30 | 0  |
| 0.00    | 1        | 2  | 0  | 4             | 61 | 0  |

Model 2

- (GT) Ageusia
- (GT) Chills
- (GT) Otitis
- Apple Mobility (transit)

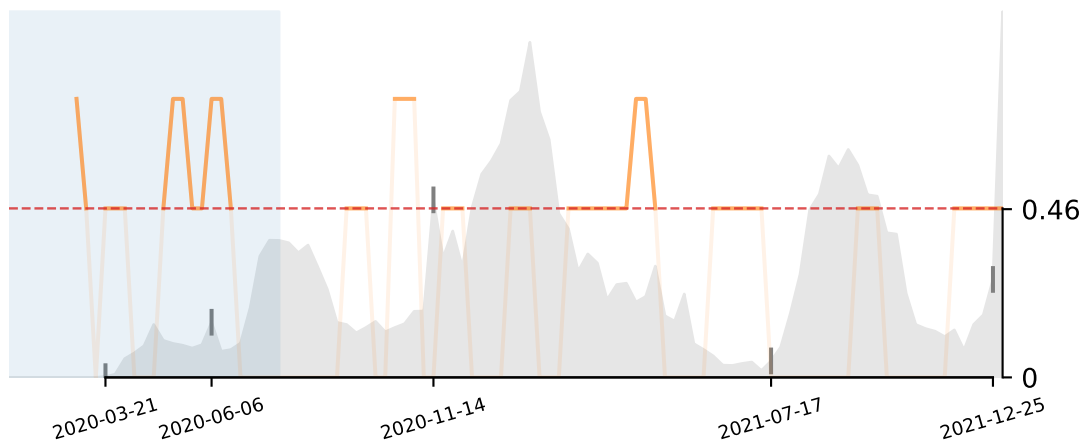

| $\beta$ | tp |    |    | fp |    |    | fn |    |    |
|---------|----|----|----|----|----|----|----|----|----|
|         | tp | fp | fn | tp | fp | fn | tp | fp | fn |
| 0.96    | 0  | 0  | 2  | 0  | 0  | 3  | 0  | 0  | 3  |
| 0.91    | 0  | 0  | 2  | 0  | 0  | 3  | 0  | 0  | 3  |
| 0.76    | 0  | 0  | 2  | 1  | 2  | 2  | 1  | 2  | 2  |
| 0.46    | 2  | 1  | 0  | 3  | 23 | 0  | 3  | 23 | 0  |
| 0.00    | 2  | 5  | 0  | 3  | 54 | 0  | 3  | 54 | 0  |

Model 3

- (GT) Ageusia
- (GT) Otitis
- (GT) how long does covid last
- Apple Mobility (transit)
- (GT) covid
- (GT) covid-19

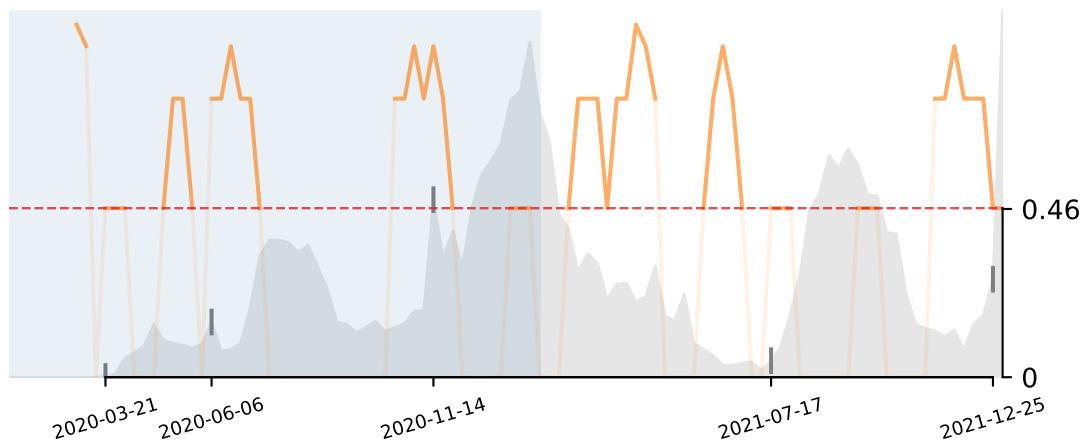

| $\beta$ | tp |    |    | fp |    |    | fn |    |    |
|---------|----|----|----|----|----|----|----|----|----|
|         | tp | fp | fn | tp | fp | fn | tp | fp | fn |
| 1.00    | 0  | 0  | 3  | 0  | 0  | 2  | 0  | 0  | 2  |
| 0.99    | 0  | 0  | 3  | 0  | 0  | 2  | 0  | 0  | 2  |
| 0.96    | 0  | 0  | 3  | 0  | 1  | 2  | 0  | 1  | 2  |
| 0.91    | 1  | 0  | 2  | 2  | 2  | 0  | 2  | 2  | 0  |
| 0.76    | 2  | 1  | 1  | 2  | 8  | 0  | 2  | 8  | 0  |
| 0.46    | 3  | 5  | 0  | 2  | 17 | 0  | 2  | 17 | 0  |
| 0.00    | 3  | 13 | 0  | 2  | 34 | 0  | 2  | 34 | 0  |

## Proxies selected by the Multiple Sources method

Model 1

- (GT) covid
- (GT) covid-19
- (GT) chest pain
- (GT) covid symptoms
- (GT) chest tightness
- (GT) covid-19 who

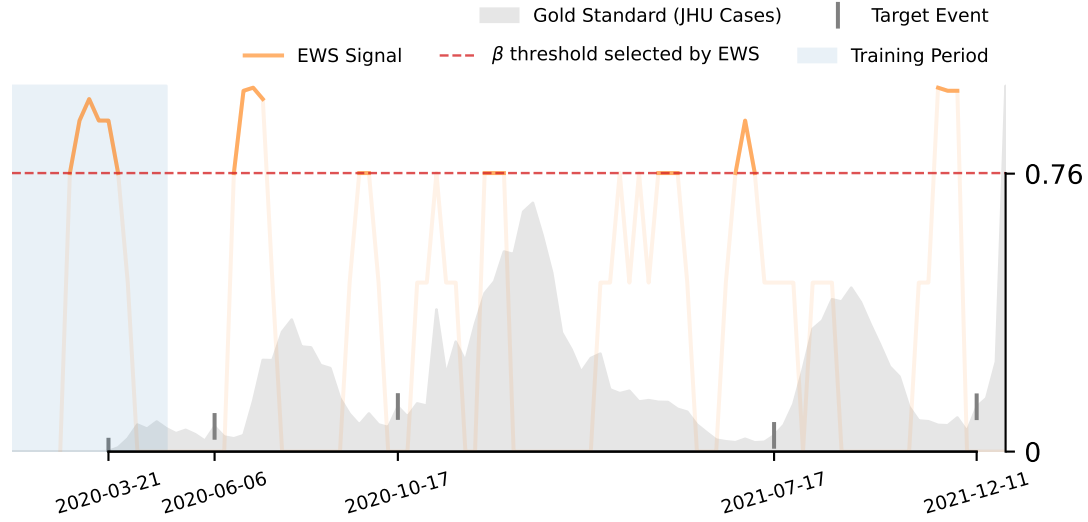

Model 2

- (GT) Ageusia
- (GT) Anosmia
- (GT) Diarrhea
- (GT) Fatigue
- (GT) Otitis
- Apple Mobility (transit)

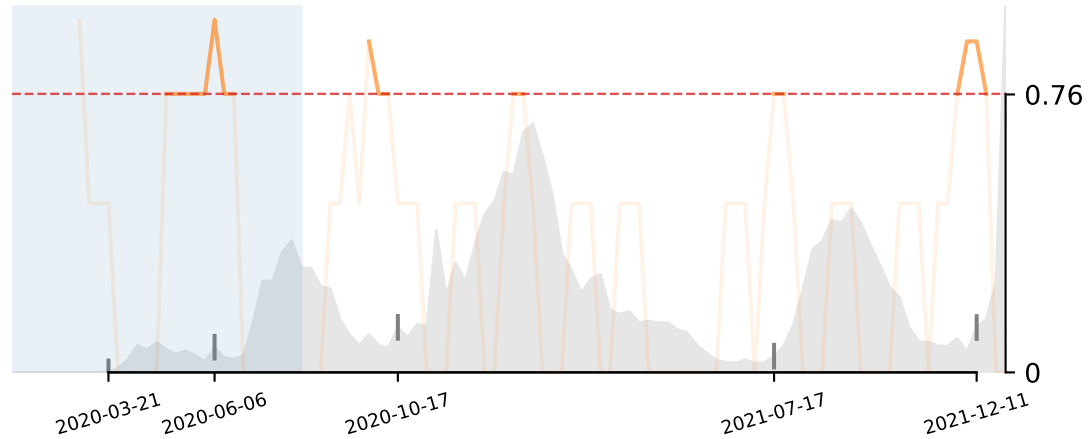

Model 3

- (GT) Ageusia
- (GT) Anosmia
- (GT) Diarrhea
- (GT) Otitis
- (GT) Hyperventilation
- Apple Mobility (transit)

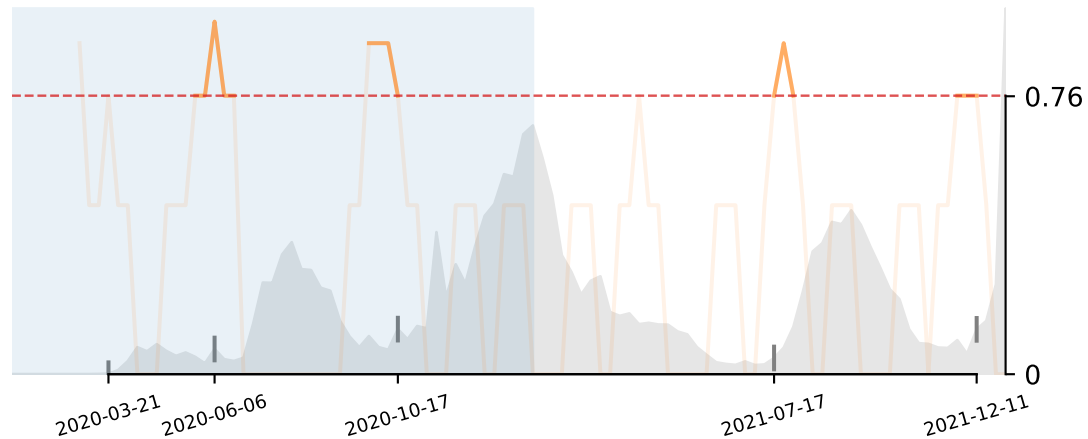

## Performance as a function of $\beta$

| $\beta$ | Training |    |    | Out of sample |    |    |
|---------|----------|----|----|---------------|----|----|
|         | tp       | fp | fn | tp            | fp | fn |
| 1.00    | 0        | 0  | 1  | 1             | 1  | 3  |
| 0.99    | 0        | 0  | 1  | 1             | 2  | 3  |
| 0.96    | 0        | 0  | 1  | 1             | 3  | 3  |
| 0.91    | 1        | 0  | 0  | 2             | 3  | 2  |
| 0.76    | 1        | 0  | 0  | 3             | 13 | 0  |
| 0.46    | 1        | 1  | 0  | 3             | 28 | 0  |
| 0.00    | 1        | 2  | 0  | 4             | 61 | 0  |

| $\beta$ | tp |    |    | fp |    |    | fn |    |    |
|---------|----|----|----|----|----|----|----|----|----|
|         | tp | fp | fn | tp | fp | fn | tp | fp | fn |
| 1.00    | 0  | 0  | 2  | 0  | 0  | 3  | 0  | 0  | 3  |
| 0.99    | 0  | 0  | 2  | 0  | 0  | 3  | 0  | 0  | 3  |
| 0.96    | 0  | 0  | 2  | 0  | 0  | 3  | 0  | 0  | 3  |
| 0.91    | 2  | 0  | 0  | 2  | 0  | 1  | 2  | 0  | 1  |
| 0.76    | 2  | 0  | 0  | 3  | 4  | 0  | 3  | 4  | 0  |
| 0.46    | 2  | 3  | 0  | 3  | 24 | 0  | 3  | 24 | 0  |
| 0.00    | 2  | 3  | 0  | 3  | 52 | 0  | 3  | 52 | 0  |

| $\beta$ | tp |    |    | fp |    |    | fn |    |    |
|---------|----|----|----|----|----|----|----|----|----|
|         | tp | fp | fn | tp | fp | fn | tp | fp | fn |
| 1.00    | 0  | 0  | 3  | 0  | 0  | 2  | 0  | 0  | 2  |
| 0.99    | 0  | 0  | 3  | 0  | 0  | 2  | 0  | 0  | 2  |
| 0.96    | 0  | 0  | 3  | 0  | 0  | 2  | 0  | 0  | 2  |
| 0.91    | 1  | 0  | 2  | 0  | 1  | 1  | 0  | 1  | 1  |
| 0.76    | 3  | 0  | 0  | 2  | 3  | 0  | 2  | 3  | 0  |
| 0.46    | 3  | 2  | 0  | 2  | 17 | 0  | 2  | 17 | 0  |
| 0.00    | 3  | 14 | 0  | 2  | 35 | 0  | 2  | 35 | 0  |

## Proxies selected by the Multiple Sources method

Model 1

- (GT) covid
- (GT) how long does covid last
- (GT) covid-19
- (GT) chest pain
- (GT) covid symptoms
- (GT) chest tightness

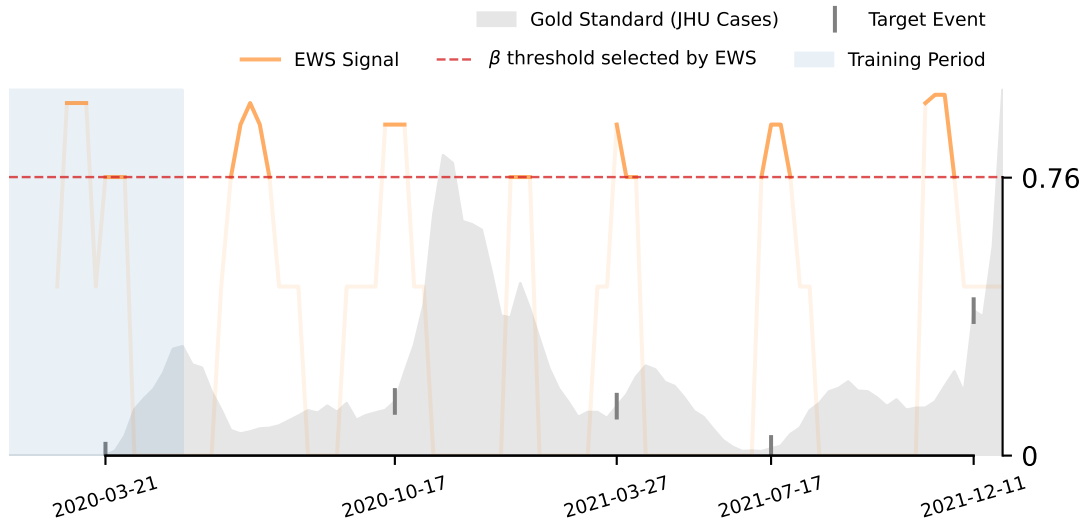

Model 2

- (GT) covid
- (GT) covid-19
- (GT) chest pain
- (GT) covid symptoms
- (GT) quarantine
- (GT) Acute bronchitis

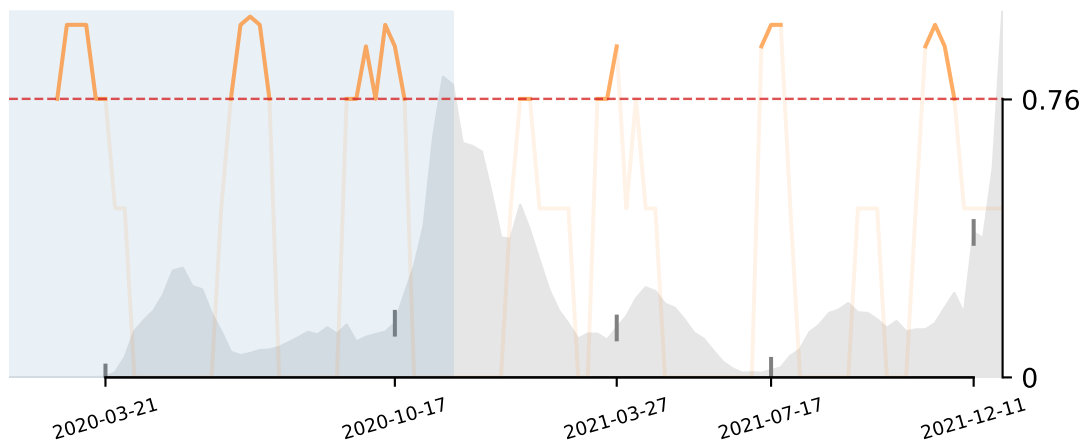

Model 3

- (GT) chest pain
- (GT) covid symptoms
- (GT) Ageusia
- (GT) Anosmia
- (GT) Bronchitis
- (GT) Cough

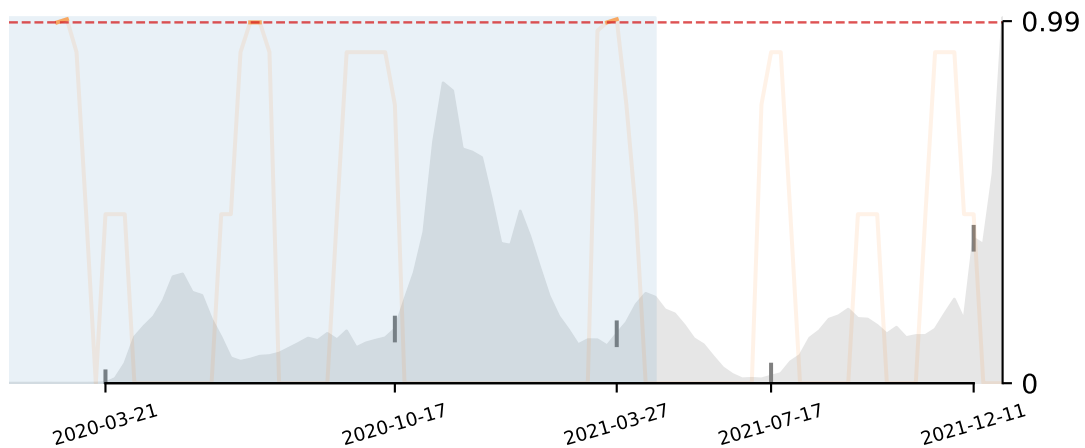

## Performance as a function of $\beta$

| $\beta$ | Training |    |    | Out of sample |    |    |
|---------|----------|----|----|---------------|----|----|
|         | tp       | fp | fn | tp            | fp | fn |
| 1.00    | 0        | 0  | 1  | 0             | 0  | 4  |
| 0.99    | 0        | 0  | 1  | 1             | 0  | 3  |
| 0.96    | 0        | 0  | 1  | 1             | 1  | 3  |
| 0.91    | 1        | 0  | 0  | 4             | 5  | 0  |
| 0.76    | 1        | 0  | 0  | 4             | 13 | 0  |
| 0.46    | 1        | 2  | 0  | 4             | 24 | 0  |
| 0.00    | 1        | 3  | 0  | 4             | 57 | 0  |

| $\beta$ | tp fp fn |    |   | tp fp fn |    |   |
|---------|----------|----|---|----------|----|---|
|         | 1.00     | 0  | 0 | 2        | 0  | 0 |
| 0.99    | 0        | 0  | 2 | 0        | 0  | 3 |
| 0.96    | 0        | 1  | 2 | 2        | 1  | 1 |
| 0.91    | 2        | 3  | 0 | 3        | 1  | 0 |
| 0.76    | 2        | 3  | 0 | 3        | 4  | 0 |
| 0.46    | 2        | 8  | 0 | 3        | 17 | 0 |
| 0.00    | 2        | 11 | 0 | 3        | 36 | 0 |

| $\beta$ | tp fp fn |    |   | tp fp fn |    |   |
|---------|----------|----|---|----------|----|---|
|         | 1.00     | 0  | 0 | 3        | 0  | 0 |
| 0.99    | 2        | 0  | 1 | 0        | 0  | 2 |
| 0.96    | 2        | 3  | 1 | 0        | 0  | 2 |
| 0.91    | 2        | 3  | 1 | 2        | 1  | 0 |
| 0.76    | 3        | 6  | 0 | 2        | 1  | 0 |
| 0.46    | 3        | 7  | 0 | 2        | 5  | 0 |
| 0.00    | 3        | 13 | 0 | 2        | 22 | 0 |

## Proxies selected by the Multiple Sources method

Model 1

- (GT) covid-19
- (GT) covid symptoms
- (GT) Abdominal pain
- (GT) covid
- (GT) Vertigo
- (GT) Anxiety

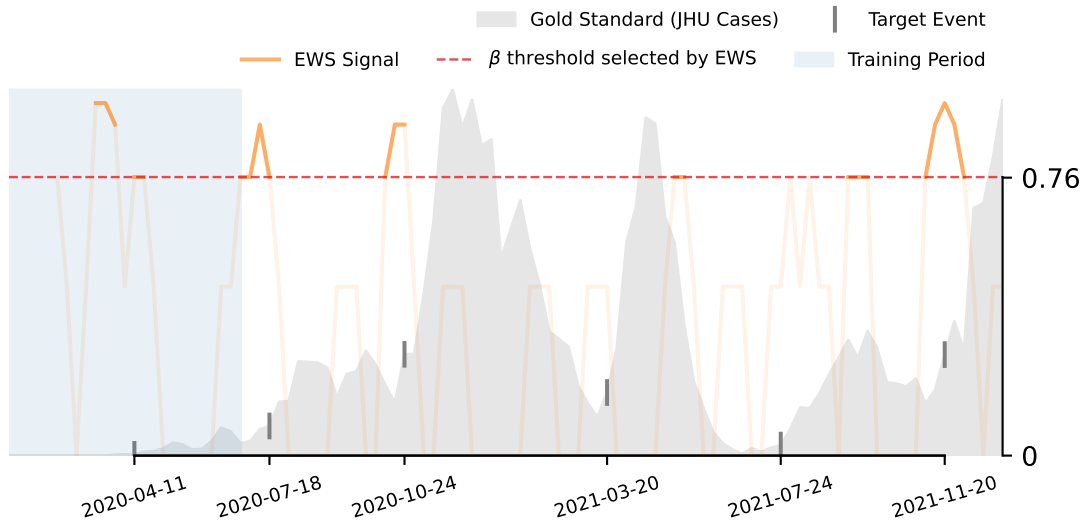

## Performance as a function of $\beta$

| $\beta$ | Training |    |    | Out of sample |    |    |
|---------|----------|----|----|---------------|----|----|
|         | tp       | fp | fn | tp            | fp | fn |
| 1.00    | 0        | 0  | 1  | 0             | 0  | 5  |
| 0.99    | 0        | 0  | 1  | 0             | 0  | 5  |
| 0.96    | 0        | 0  | 1  | 1             | 0  | 4  |
| 0.91    | 1        | 0  | 0  | 3             | 1  | 2  |
| 0.76    | 1        | 0  | 0  | 3             | 9  | 1  |
| 0.46    | 1        | 3  | 0  | 5             | 25 | 0  |
| 0.00    | 1        | 8  | 0  | 5             | 48 | 0  |

Model 2

- (GT) covid
- (GT) covid-19
- (GT) covid symptoms
- (GT) Anxiety
- (GT) Chronic pain

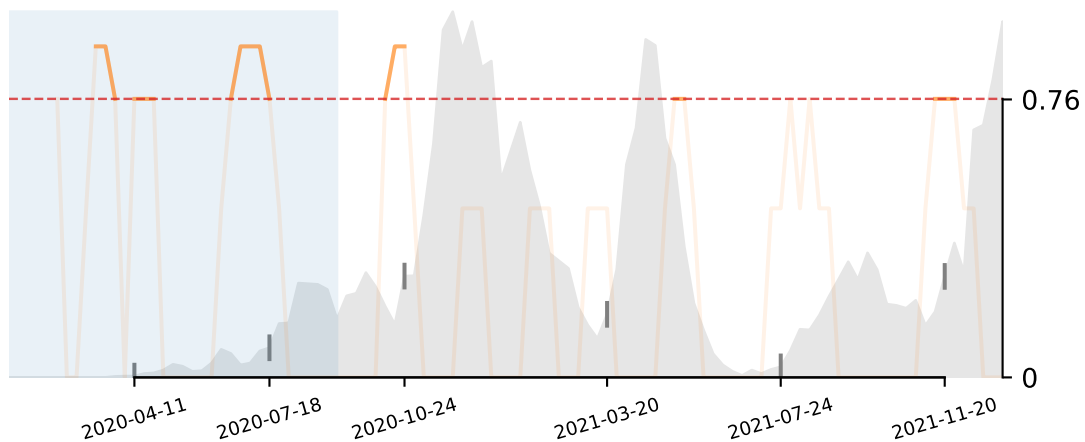

| $\beta$ | tp fp fn |   |   | tp fp fn |    |   |
|---------|----------|---|---|----------|----|---|
|         | 0.99     | 0 | 0 | 2        | 0  | 0 |
| 0.96    | 0        | 0 | 2 | 0        | 0  | 4 |
| 0.91    | 0        | 0 | 2 | 1        | 0  | 3 |
| 0.76    | 2        | 0 | 0 | 2        | 5  | 1 |
| 0.46    | 2        | 3 | 0 | 4        | 18 | 0 |
| 0.00    | 2        | 6 | 0 | 4        | 41 | 0 |

Model 3

- (GT) covid
- (GT) covid-19
- (GT) covid symptoms
- (GT) Anxiety
- (GT) Cough
- (GT) Phlegm

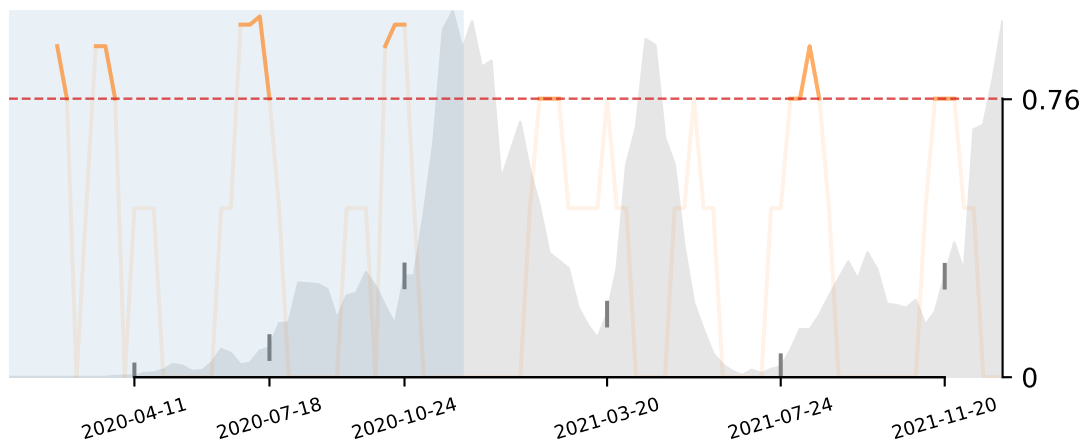

| $\beta$ | tp fp fn |    |   | tp fp fn |    |   |
|---------|----------|----|---|----------|----|---|
|         | 1.00     | 0  | 0 | 3        | 0  | 0 |
| 0.99    | 0        | 0  | 3 | 0        | 0  | 3 |
| 0.96    | 1        | 0  | 2 | 0        | 0  | 3 |
| 0.91    | 2        | 0  | 1 | 0        | 1  | 3 |
| 0.76    | 3        | 1  | 0 | 2        | 7  | 0 |
| 0.46    | 3        | 2  | 0 | 3        | 17 | 0 |
| 0.00    | 3        | 10 | 0 | 3        | 35 | 0 |

## Proxies selected by the Multiple Sources method

Model 1

- (GT) covid
- (GT) how long does covid last
- (GT) quarantine
- (GT) covid-19 who
- (GT) fever
- (GT) Chronic pain

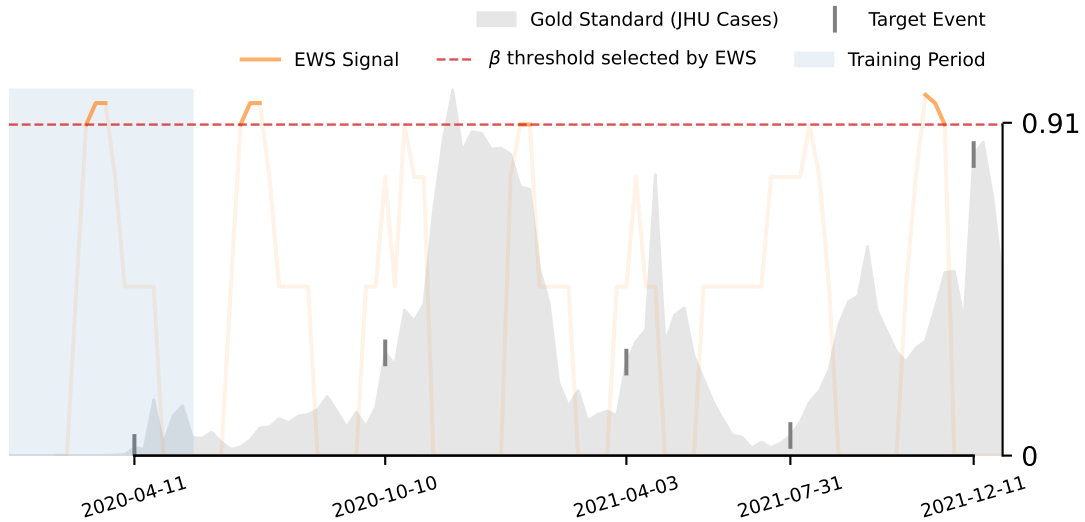

Model 2

- (GT) covid
- (GT) quarantine
- (GT) Otitis
- (GT) chest pain

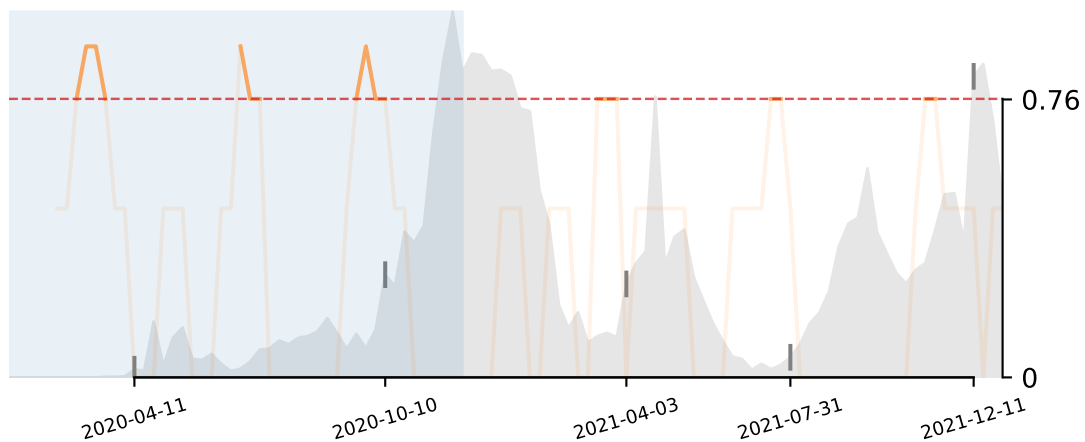

Model 3

- (GT) chest pain
- (GT) Otitis
- (GT) covid
- (GT) loss smell
- (GT) loss of smell
- (GT) covid symptoms

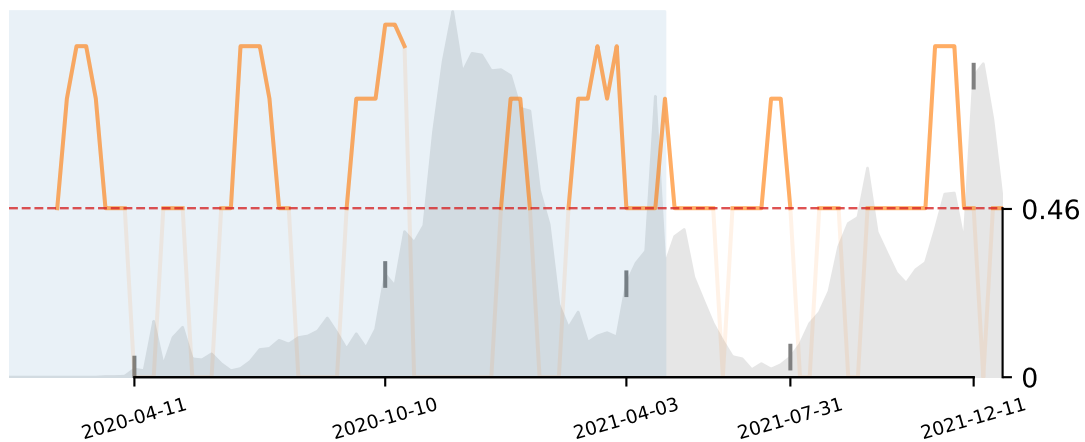

## Performance as a function of $\beta$

| $\beta$ | Training |    |    | Out of sample |    |    |
|---------|----------|----|----|---------------|----|----|
|         | tp       | fp | fn | tp            | fp | fn |
| 1.00    | 0        | 0  | 1  | 0             | 0  | 4  |
| 0.99    | 0        | 0  | 1  | 1             | 0  | 3  |
| 0.96    | 0        | 0  | 1  | 1             | 2  | 3  |
| 0.91    | 1        | 0  | 0  | 1             | 7  | 1  |
| 0.76    | 1        | 1  | 0  | 3             | 14 | 0  |
| 0.46    | 1        | 1  | 0  | 4             | 30 | 0  |
| 0.00    | 1        | 4  | 0  | 4             | 56 | 0  |

| $\beta$ | tp | fp | fn | tp | fp | fn |
|---------|----|----|----|----|----|----|
| 0.96    | 0  | 0  | 2  | 0  | 0  | 3  |
| 0.91    | 0  | 0  | 2  | 0  | 0  | 3  |
| 0.76    | 2  | 2  | 0  | 3  | 0  | 0  |
| 0.46    | 2  | 5  | 0  | 3  | 13 | 0  |
| 0.00    | 2  | 14 | 0  | 3  | 35 | 0  |

| $\beta$ | tp | fp | fn | tp | fp | fn |
|---------|----|----|----|----|----|----|
| 1.00    | 0  | 0  | 3  | 0  | 0  | 2  |
| 0.99    | 0  | 0  | 3  | 0  | 0  | 2  |
| 0.96    | 0  | 0  | 3  | 0  | 0  | 2  |
| 0.91    | 1  | 1  | 2  | 1  | 0  | 1  |
| 0.76    | 2  | 7  | 1  | 2  | 0  | 0  |
| 0.46    | 3  | 13 | 0  | 2  | 15 | 0  |
| 0.00    | 3  | 27 | 0  | 2  | 21 | 0  |



## Proxies selected by the Multiple Sources method

Model 1

- (GT) covid
- (GT) how long does covid last
- (GT) covid-19
- (GT) covid symptoms
- (GT) chest tightness
- (GT) quarantine

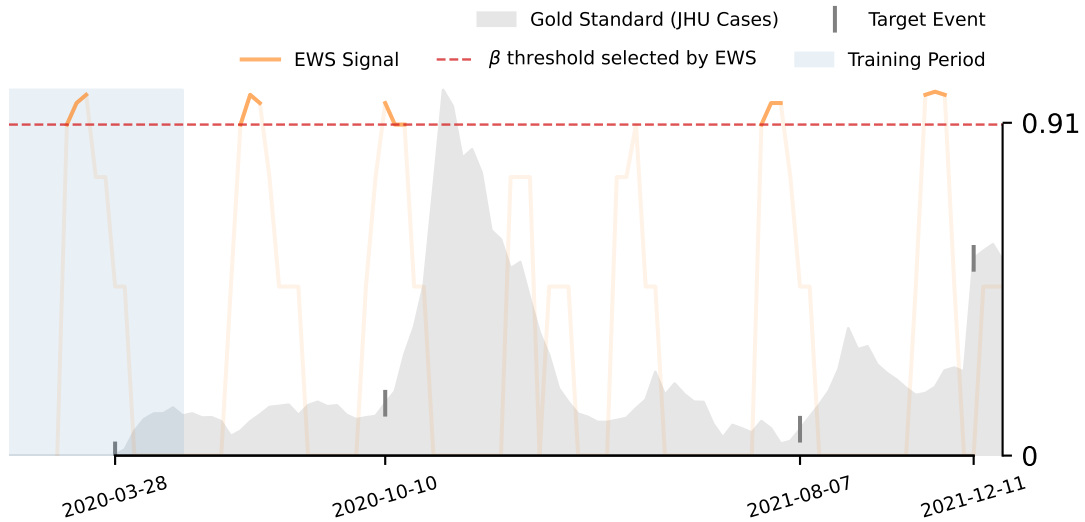

Model 2

- (GT) Wheeze
- (GT) covid
- (GT) covid-19
- (GT) covid symptoms
- (GT) quarantine
- (GT) Acute bronchitis

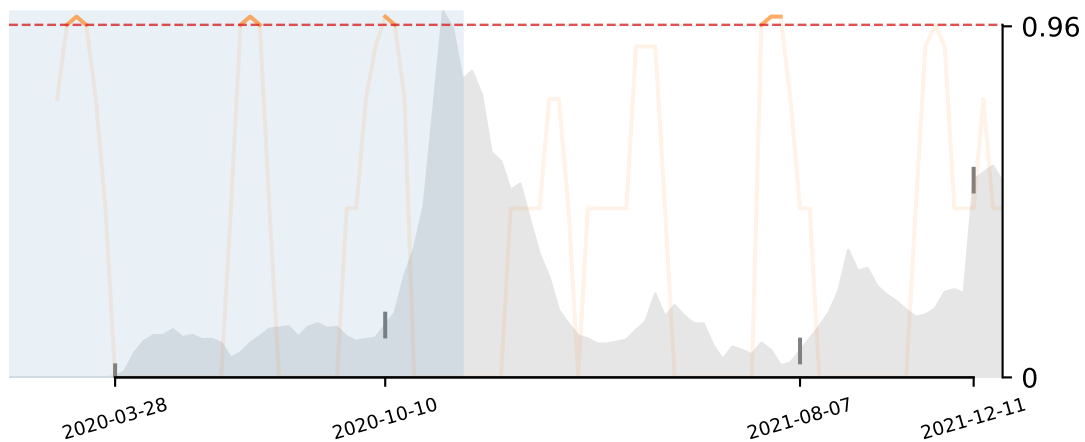

Model 3

- (GT) covid
- (GT) covid-19
- (GT) covid symptoms
- (GT) Wheeze
- (GT) quarantine
- (GT) Acute bronchitis

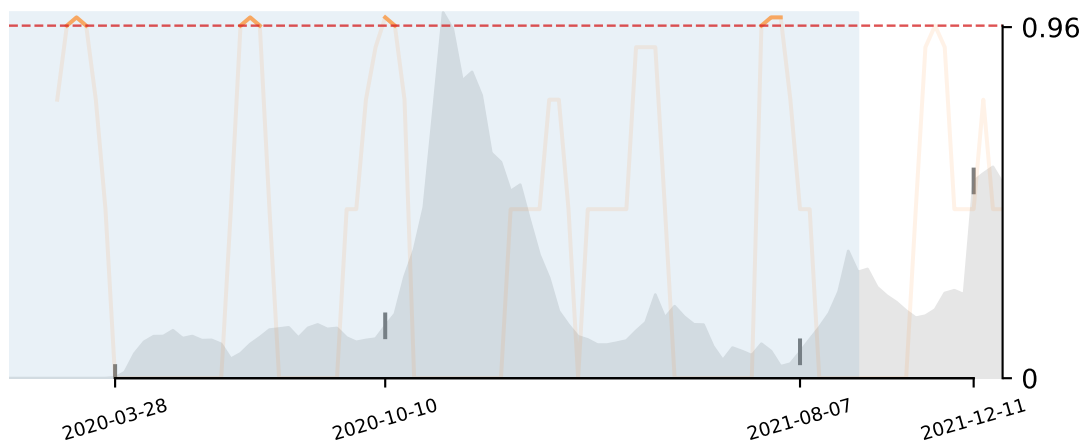

## Performance as a function of $\beta$

| $\beta$ | Training |    |    | Out of sample |    |    |
|---------|----------|----|----|---------------|----|----|
|         | tp       | fp | fn | tp            | fp | fn |
| 1.00    | 0        | 0  | 1  | 1             | 0  | 2  |
| 0.99    | 0        | 0  | 1  | 1             | 1  | 2  |
| 0.96    | 1        | 0  | 0  | 3             | 2  | 0  |
| 0.91    | 1        | 0  | 0  | 3             | 6  | 0  |
| 0.76    | 1        | 1  | 0  | 3             | 12 | 0  |
| 0.46    | 1        | 1  | 0  | 3             | 27 | 0  |
| 0.00    | 1        | 2  | 0  | 3             | 64 | 0  |

| $\beta$ | tp |    |    | fp |    |    | fn |    |    |
|---------|----|----|----|----|----|----|----|----|----|
|         | tp | fp | fn | tp | fp | fn | tp | fp | fn |
| 1.00    | 0  | 0  | 2  | 0  | 0  | 2  | 0  | 0  | 2  |
| 0.99    | 0  | 0  | 2  | 1  | 0  | 1  | 1  | 0  | 1  |
| 0.96    | 2  | 1  | 0  | 2  | 0  | 0  | 2  | 0  | 0  |
| 0.91    | 2  | 5  | 0  | 2  | 3  | 0  | 2  | 3  | 0  |
| 0.76    | 2  | 5  | 0  | 2  | 6  | 0  | 2  | 6  | 0  |
| 0.46    | 2  | 7  | 0  | 2  | 20 | 0  | 2  | 20 | 0  |
| 0.00    | 2  | 9  | 0  | 2  | 42 | 0  | 2  | 42 | 0  |

| $\beta$ | tp |    |    | fp |    |    | fn |    |    |
|---------|----|----|----|----|----|----|----|----|----|
|         | tp | fp | fn | tp | fp | fn | tp | fp | fn |
| 1.00    | 0  | 0  | 3  | 0  | 0  | 1  | 0  | 0  | 1  |
| 0.99    | 0  | 0  | 3  | 0  | 0  | 1  | 0  | 0  | 1  |
| 0.96    | 3  | 1  | 0  | 1  | 0  | 0  | 1  | 0  | 0  |
| 0.91    | 3  | 5  | 0  | 1  | 0  | 0  | 1  | 0  | 0  |
| 0.76    | 3  | 8  | 0  | 1  | 1  | 0  | 1  | 1  | 0  |
| 0.46    | 3  | 12 | 0  | 1  | 3  | 0  | 1  | 3  | 0  |
| 0.00    | 3  | 26 | 0  | 1  | 8  | 0  | 1  | 8  | 0  |

## Proxies selected by the Multiple Sources method

Model 1

- (GT) covid
- (GT) how long does covid last
- (GT) covid-19
- (GT) covid symptoms
- (GT) chest tightness
- (GT) quarantine

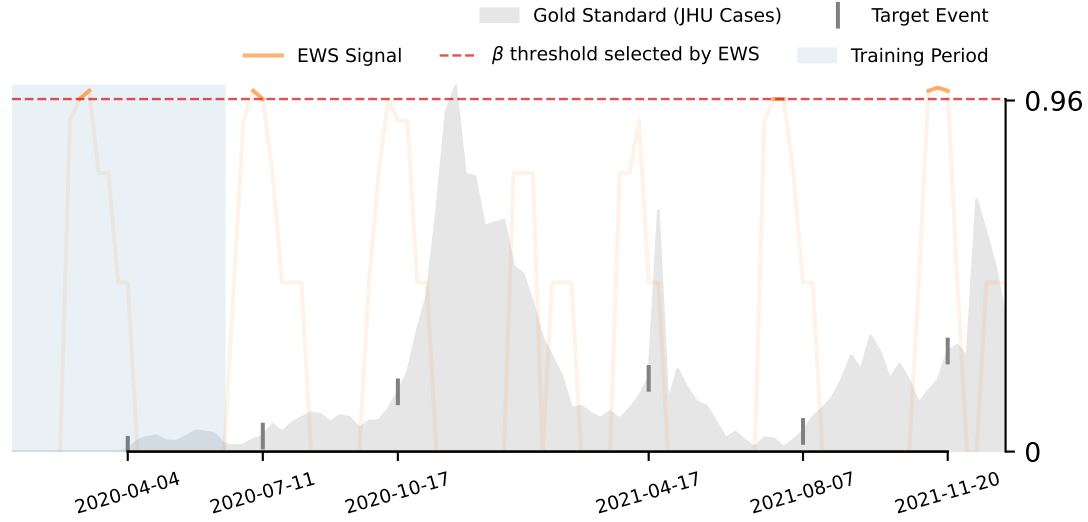

Model 2

- (GT) covid
- (GT) how long does covid last
- (GT) covid-19
- (GT) covid symptoms
- (GT) quarantine
- (GT) covid-19 who

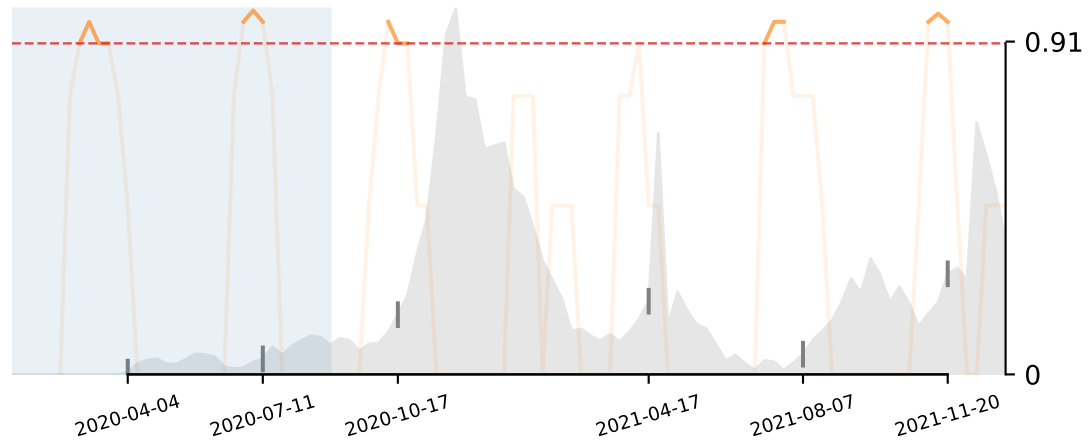

Model 3

- (GT) covid
- (GT) covid-19
- (GT) covid symptoms
- (GT) quarantine
- (GT) chest pain
- (GT) loss smell

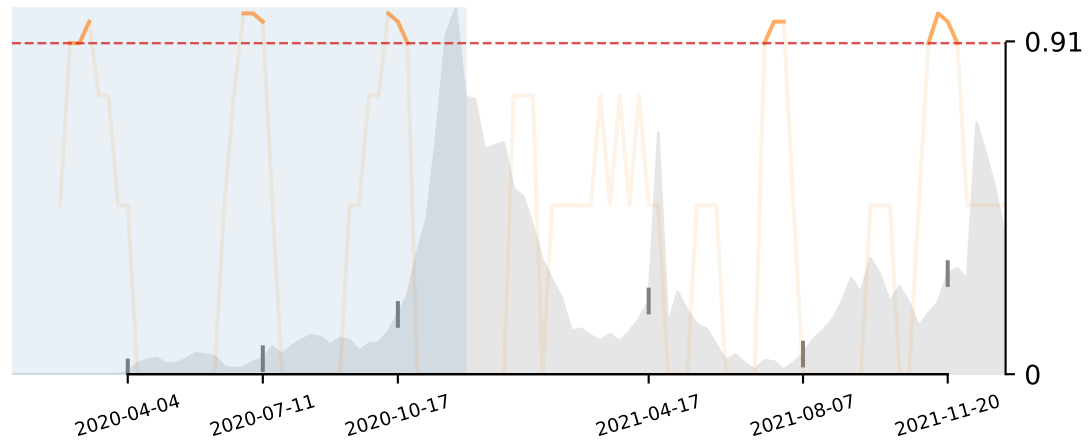

## Performance as a function of $\beta$

| $\beta$ | Training |    |    | Out of sample |    |    |
|---------|----------|----|----|---------------|----|----|
|         | tp       | fp | fn | tp            | fp | fn |
| 1.00    | 0        | 0  | 1  | 1             | 0  | 4  |
| 0.99    | 0        | 0  | 1  | 2             | 0  | 3  |
| 0.96    | 1        | 0  | 0  | 4             | 0  | 1  |
| 0.91    | 1        | 1  | 0  | 5             | 1  | 0  |
| 0.76    | 1        | 2  | 0  | 5             | 5  | 0  |
| 0.46    | 1        | 2  | 0  | 5             | 19 | 0  |
| 0.00    | 1        | 2  | 0  | 5             | 49 | 0  |

| $\beta$ | tp fp fn |   |   | tp fp fn |    |   |
|---------|----------|---|---|----------|----|---|
|         | 1.00     | 0 | 0 | 2        | 0  | 0 |
| 0.99    | 1        | 0 | 1 | 1        | 0  | 3 |
| 0.96    | 1        | 0 | 1 | 3        | 0  | 1 |
| 0.91    | 2        | 0 | 0 | 4        | 1  | 0 |
| 0.76    | 2        | 1 | 0 | 4        | 5  | 0 |
| 0.46    | 2        | 3 | 0 | 4        | 16 | 0 |
| 0.00    | 2        | 3 | 0 | 4        | 42 | 0 |

| $\beta$ | tp fp fn |   |   | tp fp fn |    |   |
|---------|----------|---|---|----------|----|---|
|         | 1.00     | 0 | 0 | 3        | 0  | 0 |
| 0.99    | 0        | 0 | 3 | 1        | 0  | 2 |
| 0.96    | 2        | 0 | 1 | 2        | 0  | 1 |
| 0.91    | 3        | 0 | 0 | 2        | 1  | 1 |
| 0.76    | 3        | 3 | 0 | 3        | 4  | 0 |
| 0.46    | 3        | 3 | 0 | 3        | 19 | 0 |
| 0.00    | 3        | 6 | 0 | 3        | 35 | 0 |

## Proxies selected by the Multiple Sources method

Model 1

- (GT) covid
- (GT) covid-19
- (GT) covid symptoms
- (GT) quarantine
- (GT) nose bleed
- (GT) fever

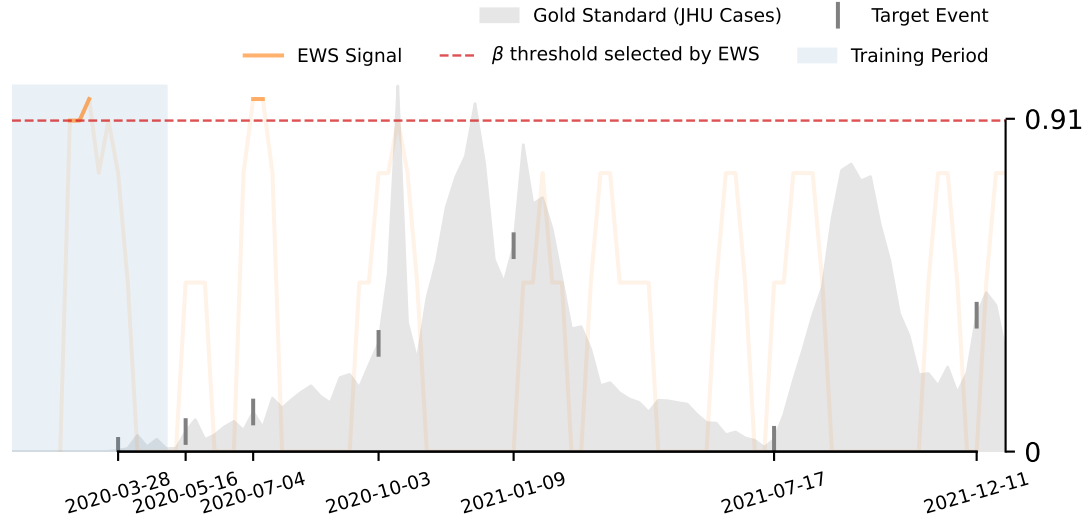

## Performance as a function of $\beta$

| $\beta$ | Training |    |    | Out of sample |    |    |
|---------|----------|----|----|---------------|----|----|
|         | tp       | fp | fn | tp            | fp | fn |
| 1.00    | 0        | 0  | 1  | 0             | 0  | 6  |
| 0.99    | 0        | 0  | 1  | 0             | 0  | 6  |
| 0.96    | 0        | 0  | 1  | 1             | 1  | 5  |
| 0.91    | 1        | 0  | 0  | 1             | 2  | 4  |
| 0.76    | 1        | 1  | 0  | 4             | 13 | 2  |
| 0.46    | 1        | 1  | 0  | 5             | 26 | 0  |
| 0.00    | 1        | 2  | 0  | 6             | 50 | 0  |

Model 2

- (GT) fever
- (GT) Abdominal pain
- Apple Mobility (driving)
- Apple Mobility (walking)
- Apple Mobility (transit)

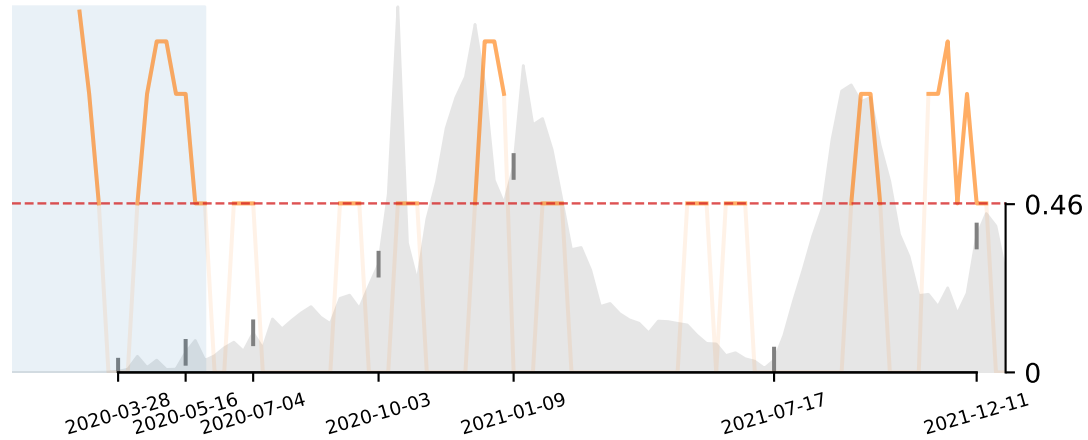

| $\beta$ | Training |    |    | Out of sample |    |    |
|---------|----------|----|----|---------------|----|----|
|         | tp       | fp | fn | tp            | fp | fn |
| 0.99    | 0        | 0  | 2  | 0             | 0  | 5  |
| 0.96    | 1        | 0  | 1  | 0             | 0  | 5  |
| 0.91    | 1        | 0  | 1  | 2             | 0  | 3  |
| 0.76    | 2        | 0  | 0  | 2             | 2  | 3  |
| 0.46    | 2        | 0  | 0  | 5             | 14 | 0  |
| 0.00    | 2        | 3  | 0  | 5             | 50 | 0  |

Model 3

- (GT) Abdominal pain
- (GT) covid
- (GT) covid-19
- (GT) covid symptoms
- (GT) quarantine
- (GT) fever

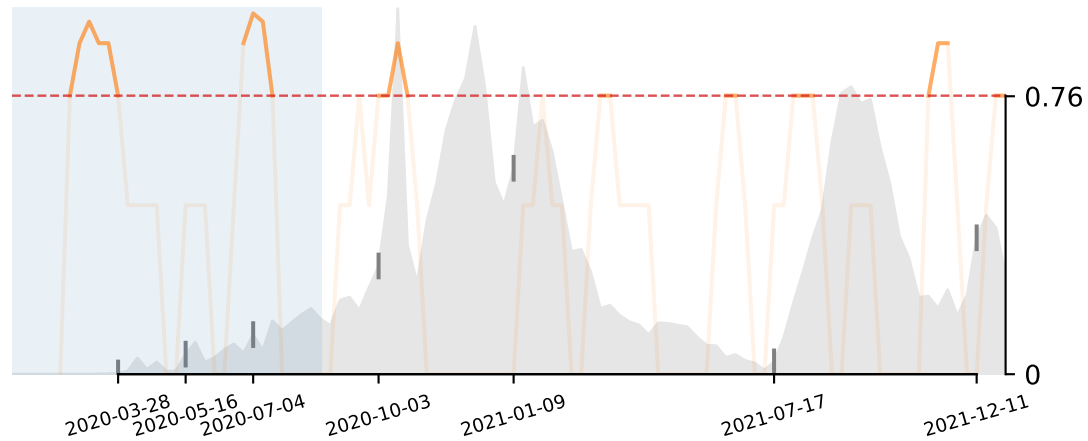

| $\beta$ | Training |    |    | Out of sample |    |    |
|---------|----------|----|----|---------------|----|----|
|         | tp       | fp | fn | tp            | fp | fn |
| 1.00    | 0        | 0  | 3  | 0             | 0  | 4  |
| 0.99    | 0        | 0  | 3  | 0             | 0  | 4  |
| 0.96    | 1        | 0  | 2  | 0             | 0  | 4  |
| 0.91    | 2        | 1  | 1  | 1             | 1  | 2  |
| 0.76    | 2        | 1  | 1  | 3             | 11 | 1  |
| 0.46    | 2        | 3  | 1  | 3             | 27 | 0  |
| 0.00    | 3        | 7  | 0  | 4             | 44 | 0  |

## Proxies selected by the Multiple Sources method

Model 1

- (GT) covid
- (GT) covid-19
- (GT) chest pain
- (GT) covid symptoms
- (GT) quarantine
- (GT) fever

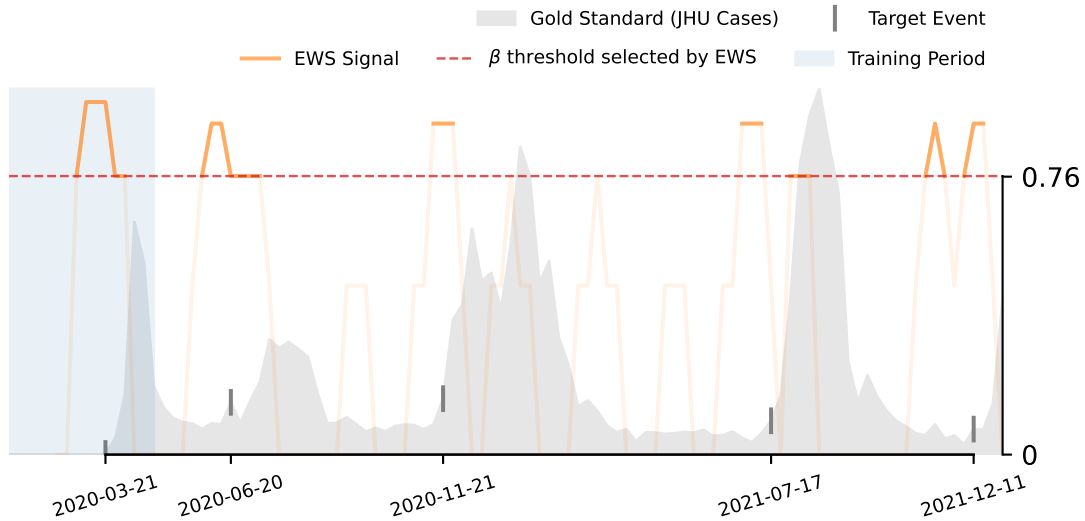

Model 2

- (GT) covid-19
- (GT) chest pain
- (GT) covid symptoms
- (GT) fever
- (GT) Diarrhea
- (GT) Otitis

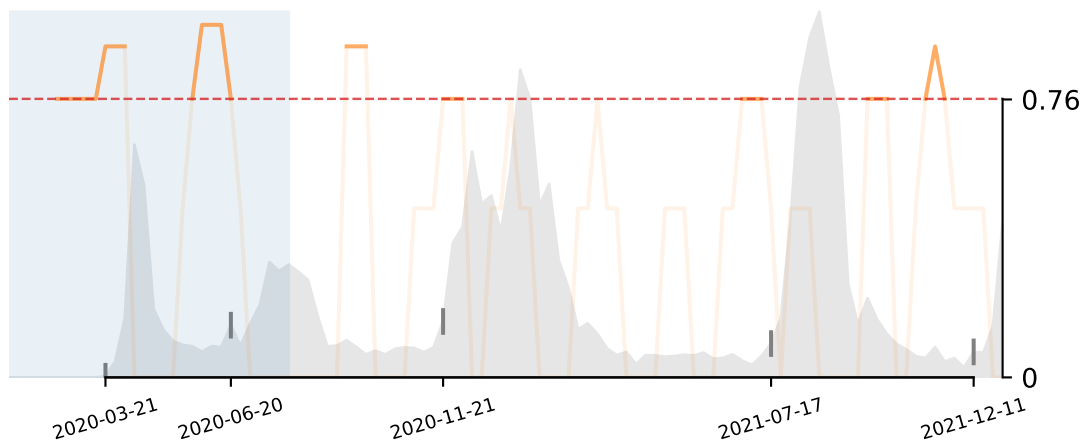

Model 3

- (GT) covid-19
- (GT) fever
- (GT) Otitis
- (GT) Chills
- (GT) chest pain
- (GT) covid

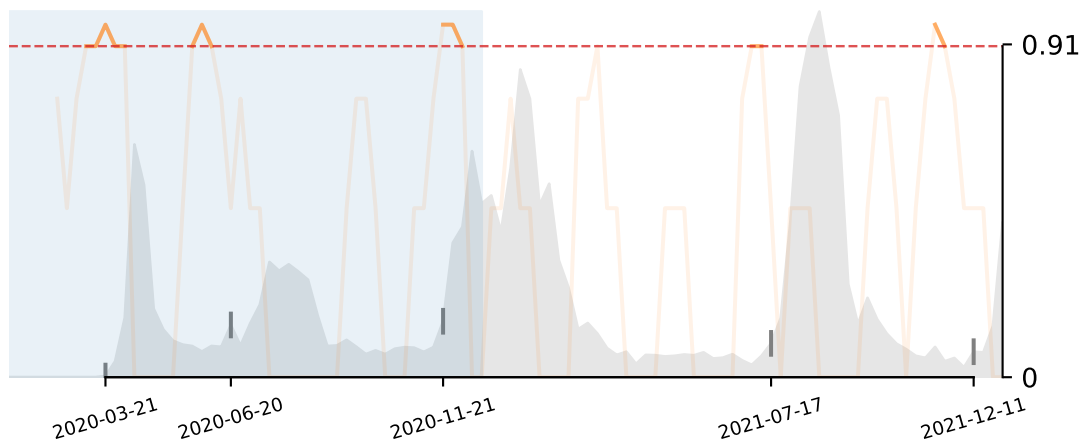

## Performance as a function of $\beta$

| $\beta$ | Training |    |    | Out of sample |    |    |
|---------|----------|----|----|---------------|----|----|
|         | tp       | fp | fn | tp            | fp | fn |
| 1.00    | 0        | 0  | 1  | 0             | 0  | 4  |
| 0.99    | 0        | 0  | 1  | 0             | 0  | 4  |
| 0.96    | 0        | 0  | 1  | 0             | 0  | 4  |
| 0.91    | 1        | 0  | 0  | 4             | 2  | 0  |
| 0.76    | 1        | 0  | 0  | 4             | 10 | 0  |
| 0.46    | 1        | 2  | 0  | 4             | 27 | 0  |
| 0.00    | 1        | 2  | 0  | 4             | 60 | 0  |

| $\beta$ | tp fp fn |   |   | tp fp fn |    |   |
|---------|----------|---|---|----------|----|---|
|         | 1.00     | 0 | 0 | 2        | 0  | 0 |
| 0.99    | 0        | 0 | 2 | 0        | 0  | 3 |
| 0.96    | 0        | 0 | 2 | 0        | 0  | 3 |
| 0.91    | 1        | 0 | 1 | 1        | 3  | 2 |
| 0.76    | 2        | 2 | 0 | 3        | 10 | 0 |
| 0.46    | 2        | 3 | 0 | 3        | 25 | 0 |
| 0.00    | 2        | 5 | 0 | 3        | 53 | 0 |

| $\beta$ | tp fp fn |    |   | tp fp fn |    |   |
|---------|----------|----|---|----------|----|---|
|         | 1.00     | 0  | 0 | 3        | 0  | 0 |
| 0.99    | 0        | 0  | 3 | 0        | 0  | 2 |
| 0.96    | 0        | 0  | 3 | 1        | 0  | 1 |
| 0.91    | 3        | 1  | 0 | 2        | 1  | 0 |
| 0.76    | 3        | 4  | 0 | 2        | 6  | 0 |
| 0.46    | 3        | 8  | 0 | 2        | 21 | 0 |
| 0.00    | 3        | 13 | 0 | 2        | 40 | 0 |

## Proxies selected by the Multiple Sources method

Model 1

- (GT) covid
- (GT) covid-19
- (GT) chest pain
- (GT) covid symptoms
- (GT) quarantine
- (GT) fever

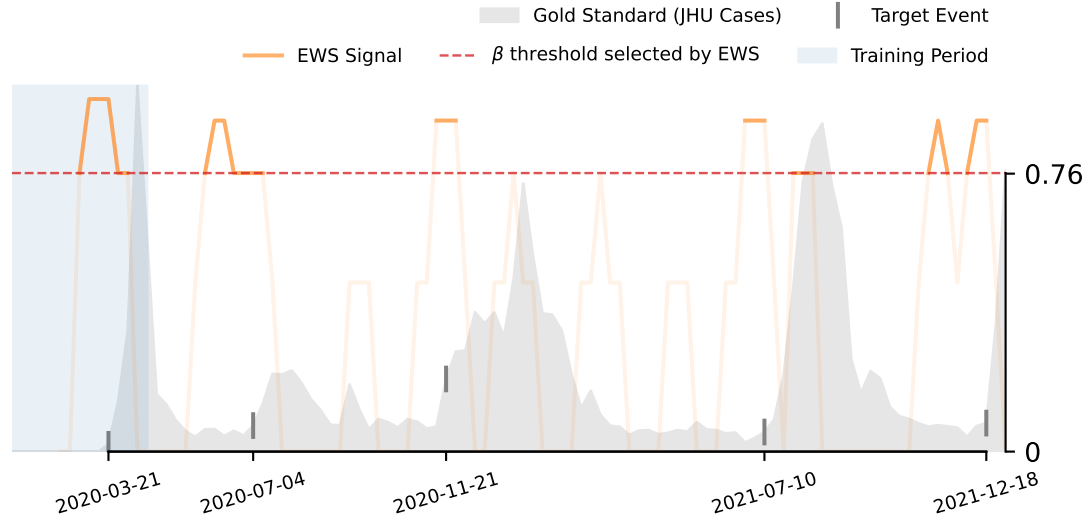

Model 2

- (GT) covid
- (GT) covid-19
- (GT) chest pain
- (GT) covid symptoms
- (GT) quarantine
- (GT) fever

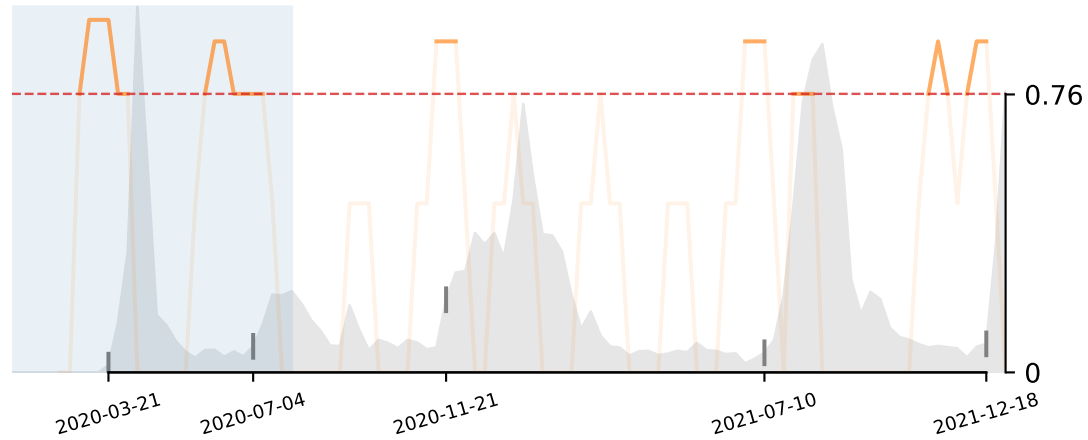

Model 3

- (GT) covid
- (GT) covid-19
- (GT) quarantine
- (GT) fever
- (GT) Abdominal pain
- (GT) Diarrhea

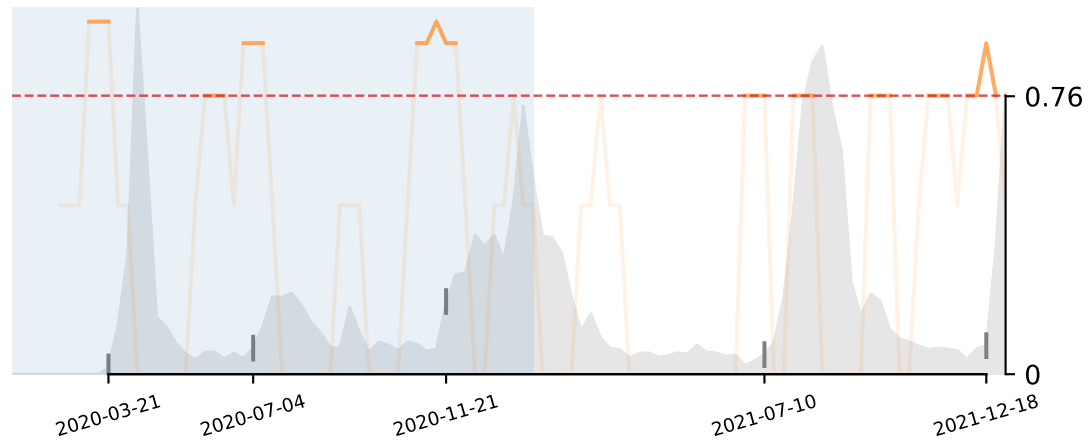

## Performance as a function of $\beta$

| $\beta$ | Training |    |    | Out of sample |    |    |
|---------|----------|----|----|---------------|----|----|
|         | tp       | fp | fn | tp            | fp | fn |
| 1.00    | 0        | 0  | 1  | 0             | 0  | 4  |
| 0.99    | 0        | 0  | 1  | 0             | 0  | 4  |
| 0.96    | 0        | 0  | 1  | 0             | 0  | 4  |
| 0.91    | 1        | 0  | 0  | 4             | 1  | 0  |
| 0.76    | 1        | 0  | 0  | 4             | 7  | 0  |
| 0.46    | 1        | 2  | 0  | 4             | 26 | 0  |
| 0.00    | 1        | 2  | 0  | 4             | 61 | 0  |

| $\beta$ | tp fp fn |   |   | tp fp fn |    |   |
|---------|----------|---|---|----------|----|---|
|         | 1.00     | 0 | 0 | 2        | 0  | 0 |
| 0.99    | 0        | 0 | 2 | 0        | 0  | 3 |
| 0.96    | 0        | 0 | 2 | 0        | 0  | 3 |
| 0.91    | 1        | 0 | 1 | 3        | 1  | 0 |
| 0.76    | 2        | 0 | 0 | 3        | 6  | 0 |
| 0.46    | 2        | 4 | 0 | 3        | 24 | 0 |
| 0.00    | 2        | 6 | 0 | 3        | 53 | 0 |

| $\beta$ | tp fp fn |    |   | tp fp fn |    |   |
|---------|----------|----|---|----------|----|---|
|         | 1.00     | 0  | 0 | 3        | 0  | 0 |
| 0.99    | 0        | 0  | 3 | 0        | 0  | 2 |
| 0.96    | 0        | 0  | 3 | 0        | 0  | 2 |
| 0.91    | 2        | 0  | 1 | 1        | 0  | 1 |
| 0.76    | 3        | 2  | 0 | 2        | 8  | 0 |
| 0.46    | 3        | 4  | 0 | 2        | 14 | 0 |
| 0.00    | 3        | 17 | 0 | 2        | 35 | 0 |

## Proxies selected by the Multiple Sources method

Model 1

- (GT) covid
- (GT) covid-19
- (GT) chest pain
- (GT) covid symptoms
- (GT) quarantine
- (GT) covid-19 who

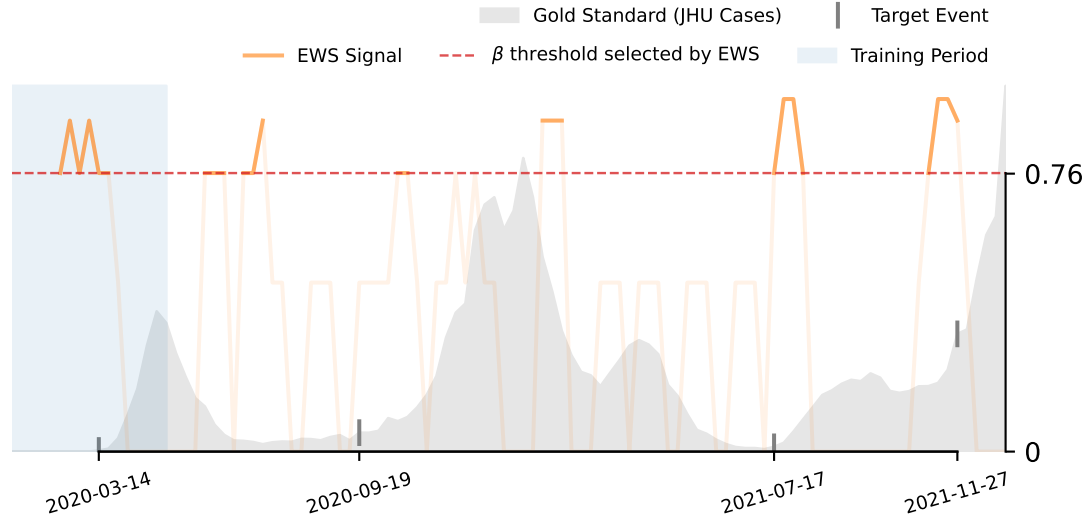

Model 2

- (GT) Viral pneumonia
- (GT) covid-19
- (GT) Anosmia
- (GT) Burning Chest Pain
- (GT) Cardiac arrest
- (GT) Hyperventilation

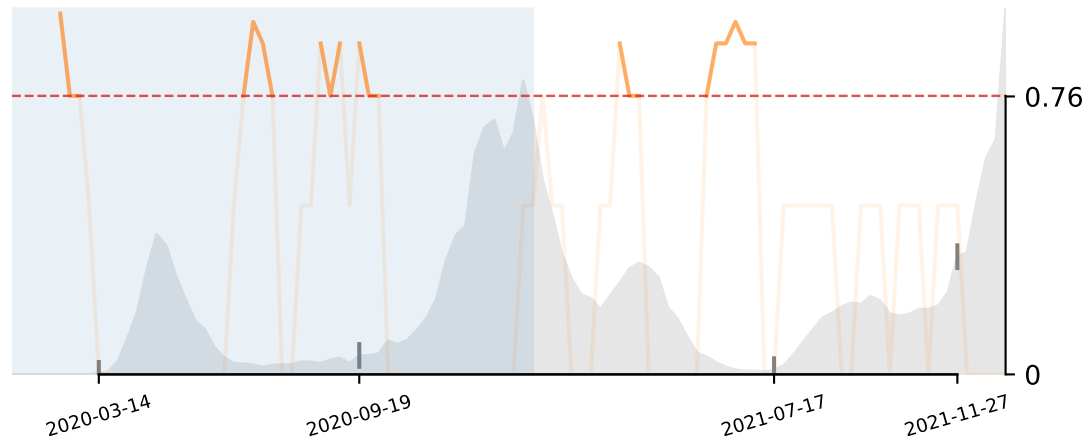

Model 3

- (GT) Burning Chest Pain
- (GT) Viral pneumonia
- (GT) covid-19
- (GT) Asphyxia
- (GT) Hyperventilation
- (GT) chest pain

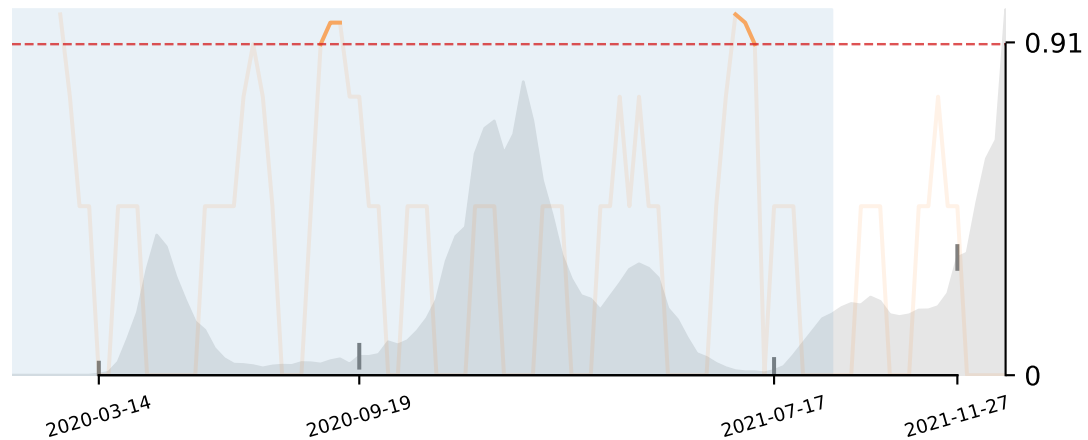

## Performance as a function of $\beta$

| $\beta$ | Training |    |    | Out of sample |    |    |
|---------|----------|----|----|---------------|----|----|
|         | tp       | fp | fn | tp            | fp | fn |
| 1.00    | 0        | 0  | 1  | 0             | 0  | 3  |
| 0.99    | 0        | 0  | 1  | 0             | 0  | 3  |
| 0.96    | 0        | 0  | 1  | 1             | 2  | 1  |
| 0.91    | 0        | 0  | 1  | 1             | 6  | 1  |
| 0.76    | 1        | 0  | 0  | 2             | 16 | 1  |
| 0.46    | 1        | 1  | 0  | 3             | 37 | 0  |
| 0.00    | 1        | 2  | 0  | 3             | 66 | 0  |

| $\beta$ | tp fp fn |    |   | tp fp fn |    |   |
|---------|----------|----|---|----------|----|---|
|         | 1.00     | 0  | 0 | 2        | 0  | 0 |
| 0.99    | 0        | 0  | 2 | 0        | 0  | 2 |
| 0.96    | 1        | 0  | 1 | 1        | 0  | 1 |
| 0.91    | 1        | 1  | 1 | 1        | 1  | 1 |
| 0.76    | 2        | 2  | 0 | 1        | 5  | 1 |
| 0.46    | 2        | 6  | 0 | 2        | 18 | 0 |
| 0.00    | 2        | 11 | 0 | 2        | 35 | 0 |

| $\beta$ | tp fp fn |    |   | tp fp fn |    |   |
|---------|----------|----|---|----------|----|---|
|         | 1.00     | 0  | 0 | 3        | 0  | 0 |
| 0.99    | 0        | 0  | 3 | 0        | 0  | 1 |
| 0.96    | 2        | 0  | 1 | 0        | 0  | 1 |
| 0.91    | 3        | 0  | 0 | 0        | 0  | 1 |
| 0.76    | 3        | 1  | 0 | 1        | 0  | 0 |
| 0.46    | 3        | 6  | 0 | 1        | 3  | 0 |
| 0.00    | 3        | 34 | 0 | 1        | 11 | 0 |

## Proxies selected by the Multiple Sources method

Model 1

- (GT) covid
- (GT) covid-19
- (GT) chest pain
- (GT) covid symptoms
- (GT) quarantine
- (GT) covid-19 who

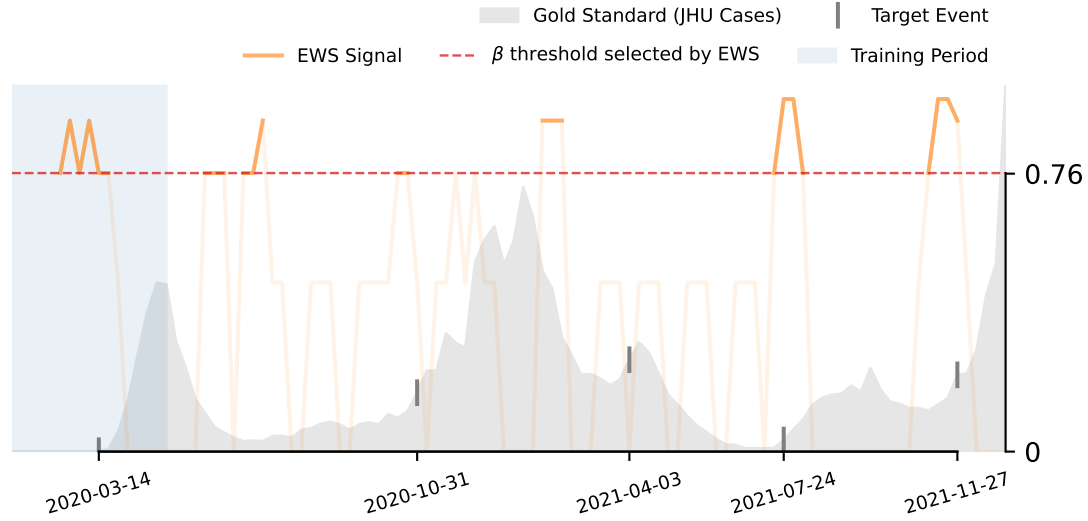

Model 2

- (GT) covid
- (GT) covid-19
- (GT) quarantine
- (GT) Abdominal pain
- (GT) Ageusia
- (GT) Anosmia

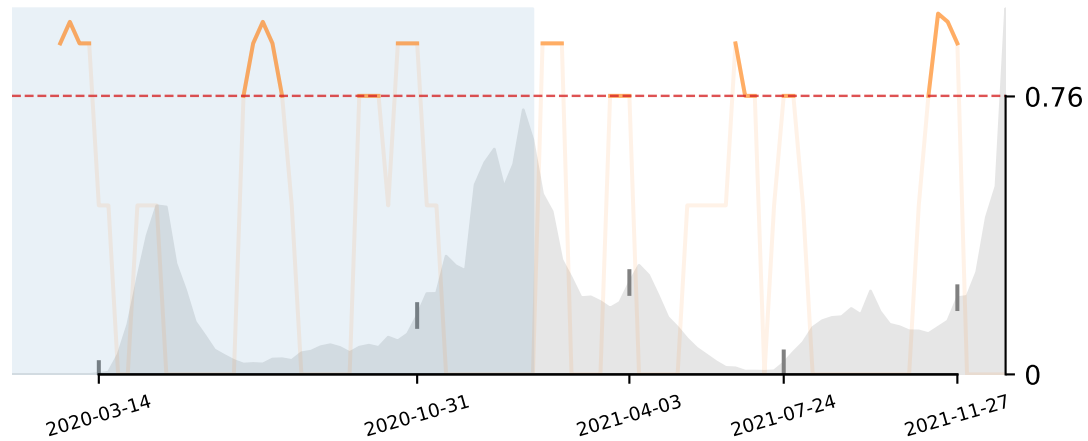

Model 3

- (GT) Ageusia
- (GT) Anosmia
- (GT) Fever
- (GT) Vertigo
- (GT) loss smell
- (GT) loss of smell

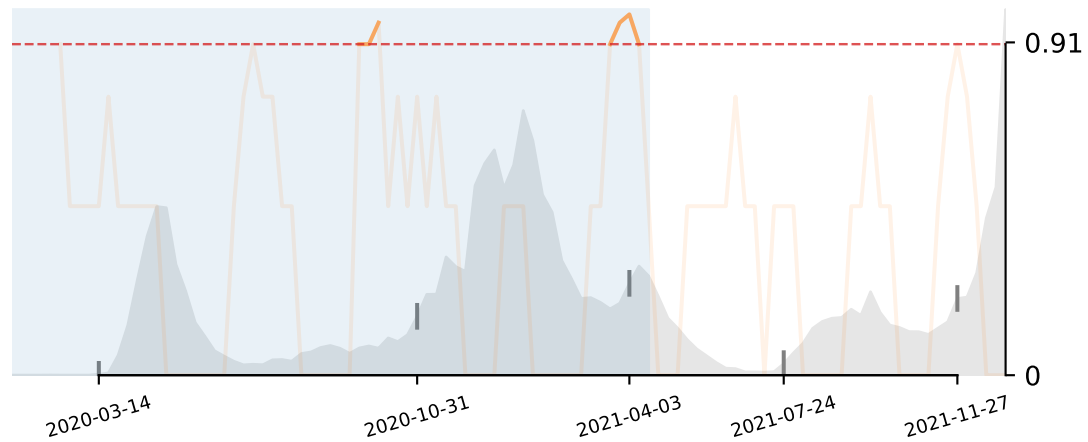

## Performance as a function of $\beta$

| $\beta$ | Training |    |    | Out of sample |    |    |
|---------|----------|----|----|---------------|----|----|
|         | tp       | fp | fn | tp            | fp | fn |
| 1.00    | 0        | 0  | 1  | 0             | 0  | 4  |
| 0.99    | 0        | 0  | 1  | 0             | 0  | 4  |
| 0.96    | 0        | 0  | 1  | 2             | 1  | 2  |
| 0.91    | 0        | 0  | 1  | 2             | 5  | 2  |
| 0.76    | 1        | 0  | 0  | 3             | 13 | 1  |
| 0.46    | 1        | 1  | 0  | 4             | 30 | 0  |
| 0.00    | 1        | 2  | 0  | 4             | 59 | 0  |

| $\beta$ | tp fp fn |    |   | tp fp fn |    |   |
|---------|----------|----|---|----------|----|---|
|         | 1.00     | 0  | 0 | 2        | 0  | 0 |
| 0.99    | 0        | 0  | 2 | 1        | 0  | 2 |
| 0.96    | 0        | 0  | 2 | 1        | 0  | 2 |
| 0.91    | 1        | 1  | 1 | 2        | 3  | 1 |
| 0.76    | 2        | 3  | 0 | 3        | 4  | 0 |
| 0.46    | 2        | 7  | 0 | 3        | 9  | 0 |
| 0.00    | 2        | 14 | 0 | 3        | 28 | 0 |

| $\beta$ | tp fp fn |    |   | tp fp fn |    |   |
|---------|----------|----|---|----------|----|---|
|         | 1.00     | 0  | 0 | 3        | 0  | 0 |
| 0.99    | 0        | 0  | 3 | 0        | 0  | 2 |
| 0.96    | 1        | 0  | 2 | 0        | 0  | 2 |
| 0.91    | 2        | 0  | 1 | 1        | 0  | 1 |
| 0.76    | 3        | 4  | 0 | 2        | 2  | 0 |
| 0.46    | 3        | 9  | 0 | 2        | 12 | 0 |
| 0.00    | 3        | 24 | 0 | 2        | 23 | 0 |

## Proxies selected by the Multiple Sources method

Model 1

- (GT) covid
- (GT) covid-19
- (GT) chest pain
- (GT) covid symptoms
- (GT) quarantine
- (GT) covid-19 who

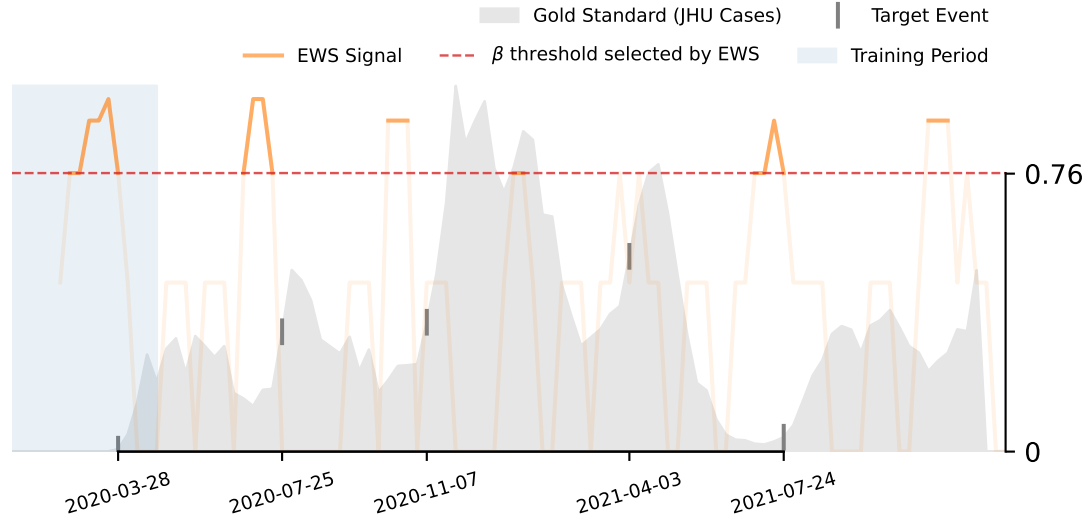

Model 2

- (GT) covid
- (GT) covid-19
- (GT) chest pain
- (GT) Acute bronchitis
- (GT) Ageusia
- (GT) Bronchitis

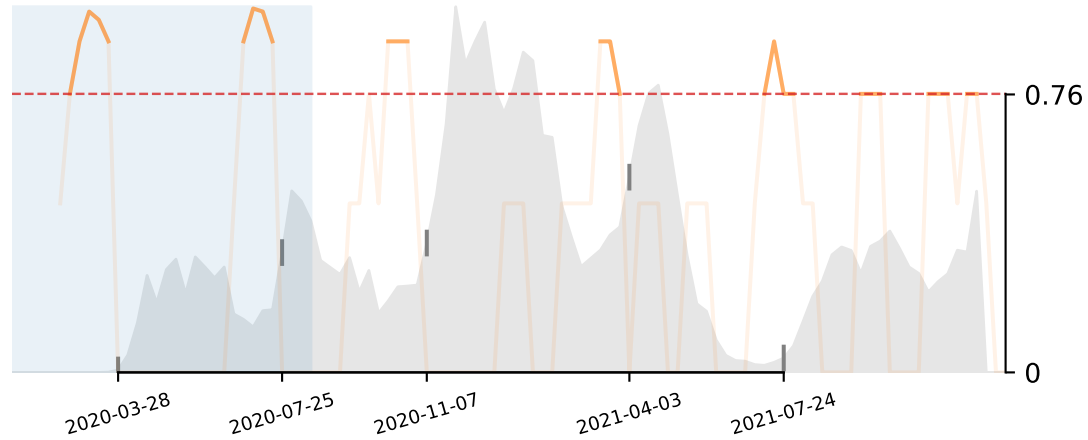

Model 3

- (GT) covid
- (GT) chest pain
- (GT) Acute bronchitis
- (GT) Ageusia
- (GT) Phlegm
- (GT) quarantine

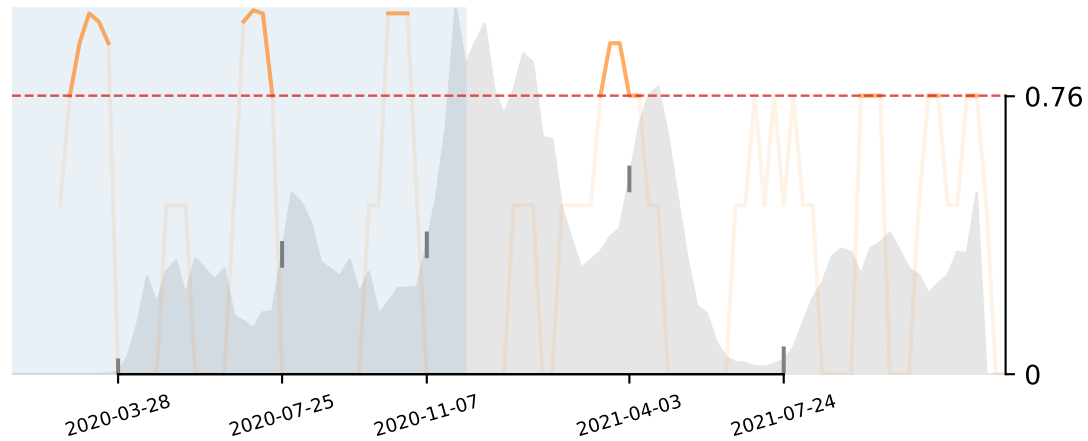

## Performance as a function of $\beta$

| $\beta$ | Training |    |    | Out of sample |    |    |
|---------|----------|----|----|---------------|----|----|
|         | tp       | fp | fn | tp            | fp | fn |
| 1.00    | 0        | 0  | 1  | 0             | 0  | 4  |
| 0.99    | 0        | 0  | 1  | 0             | 0  | 4  |
| 0.96    | 0        | 0  | 1  | 1             | 0  | 3  |
| 0.91    | 1        | 0  | 0  | 3             | 3  | 1  |
| 0.76    | 1        | 0  | 0  | 4             | 7  | 0  |
| 0.46    | 1        | 1  | 0  | 4             | 35 | 0  |
| 0.00    | 1        | 3  | 0  | 4             | 60 | 0  |

| $\beta$ | tp fp fn |   |   | tp fp fn |    |   |
|---------|----------|---|---|----------|----|---|
|         | 1.00     | 0 | 0 | 2        | 0  | 0 |
| 0.99    | 1        | 0 | 1 | 0        | 0  | 3 |
| 0.96    | 2        | 0 | 0 | 0        | 0  | 3 |
| 0.91    | 2        | 0 | 0 | 3        | 0  | 0 |
| 0.76    | 2        | 0 | 0 | 3        | 9  | 0 |
| 0.46    | 2        | 1 | 0 | 3        | 25 | 0 |
| 0.00    | 2        | 3 | 0 | 3        | 51 | 0 |

| $\beta$ | tp fp fn |   |   | tp fp fn |    |   |
|---------|----------|---|---|----------|----|---|
|         | 1.00     | 0 | 0 | 3        | 0  | 0 |
| 0.99    | 1        | 0 | 2 | 0        | 0  | 2 |
| 0.96    | 3        | 0 | 0 | 0        | 0  | 2 |
| 0.91    | 3        | 0 | 0 | 1        | 0  | 1 |
| 0.76    | 3        | 0 | 0 | 2        | 9  | 0 |
| 0.46    | 3        | 1 | 0 | 2        | 21 | 0 |
| 0.00    | 3        | 8 | 0 | 2        | 42 | 0 |



## Proxies selected by the Multiple Sources method

Model 1

- (GT) covid
- (GT) how long does covid last
- (GT) covid-19
- (GT) chest pain
- (GT) covid symptoms
- (GT) quarantine

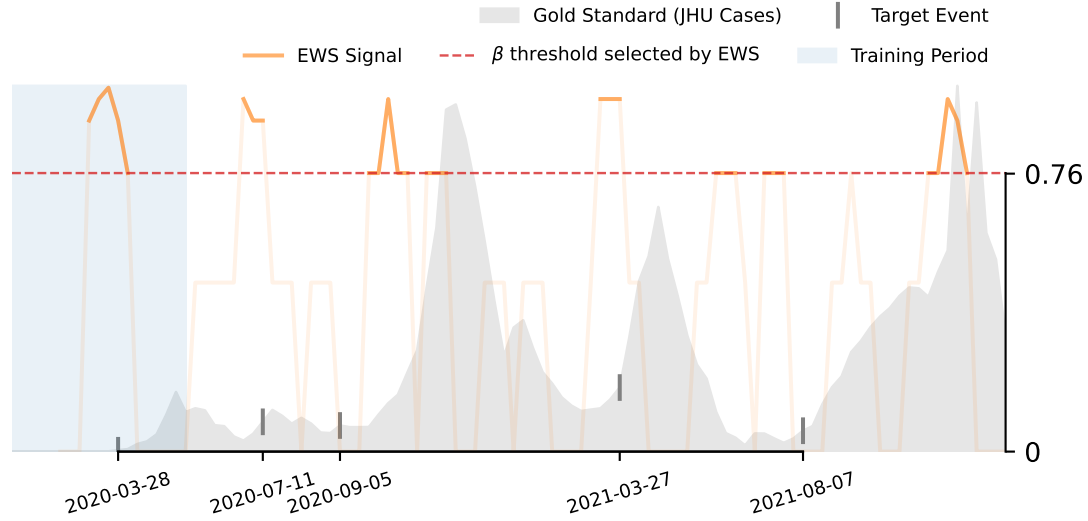

Model 2

- (GT) covid
- (GT) covid-19
- (GT) chest pain
- (GT) covid symptoms
- (GT) Anosmia
- (GT) Asthma

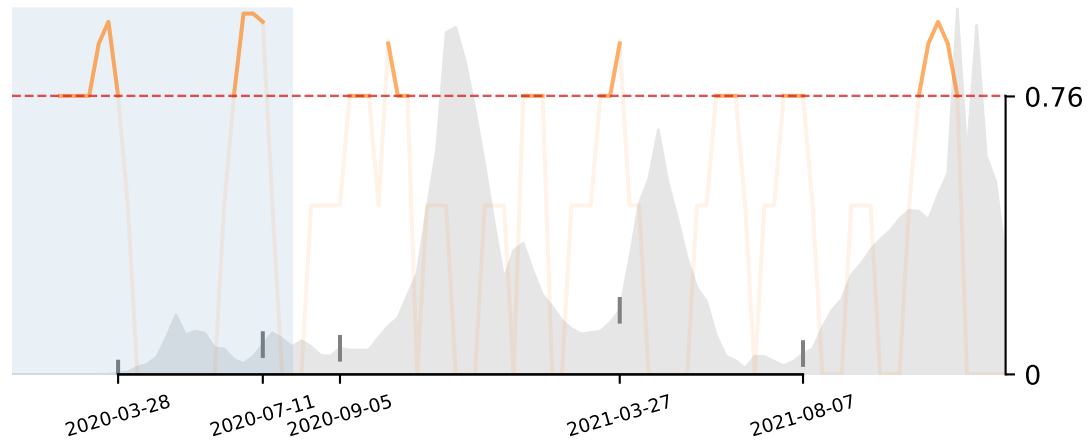

Model 3

- (GT) Anosmia
- (GT) chest pain
- (GT) Nasal congestion
- (GT) Wheeze
- (GT) covid
- (GT) covid-19

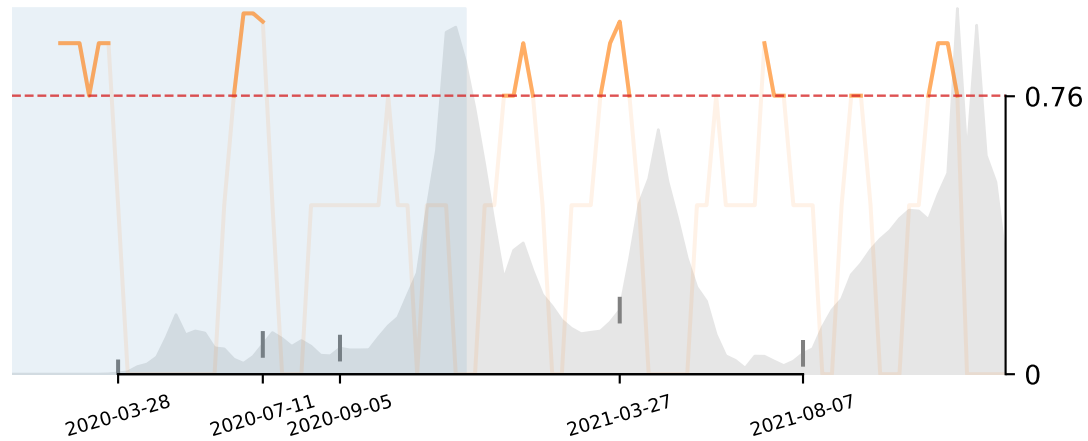

## Performance as a function of $\beta$

| $\beta$ | Training |    |    | Out of sample |    |    |
|---------|----------|----|----|---------------|----|----|
|         | tp       | fp | fn | tp            | fp | fn |
| 1.00    | 0        | 0  | 1  | 0             | 0  | 4  |
| 0.99    | 1        | 0  | 0  | 0             | 0  | 4  |
| 0.96    | 1        | 0  | 0  | 2             | 2  | 2  |
| 0.91    | 1        | 0  | 0  | 2             | 3  | 2  |
| 0.76    | 1        | 0  | 0  | 3             | 17 | 1  |
| 0.46    | 1        | 1  | 0  | 4             | 35 | 0  |
| 0.00    | 1        | 1  | 0  | 4             | 57 | 0  |

| $\beta$ | tp fp fn |   |   | tp fp fn |    |   |
|---------|----------|---|---|----------|----|---|
|         | 1.00     | 0 | 0 | 2        | 0  | 0 |
| 0.99    | 0        | 0 | 2 | 0        | 0  | 3 |
| 0.96    | 1        | 0 | 1 | 0        | 1  | 3 |
| 0.91    | 2        | 0 | 0 | 1        | 4  | 2 |
| 0.76    | 2        | 0 | 0 | 2        | 17 | 0 |
| 0.46    | 2        | 2 | 0 | 3        | 33 | 0 |
| 0.00    | 2        | 4 | 0 | 3        | 55 | 0 |

| $\beta$ | tp fp fn |    |   | tp fp fn |    |   |
|---------|----------|----|---|----------|----|---|
|         | 1.00     | 0  | 0 | 3        | 0  | 0 |
| 0.99    | 0        | 0  | 3 | 0        | 0  | 2 |
| 0.96    | 1        | 0  | 2 | 1        | 0  | 1 |
| 0.91    | 1        | 0  | 2 | 2        | 3  | 0 |
| 0.76    | 2        | 2  | 1 | 2        | 12 | 0 |
| 0.46    | 2        | 3  | 1 | 2        | 25 | 0 |
| 0.00    | 3        | 13 | 0 | 2        | 42 | 0 |

## Proxies selected by the Multiple Sources method

Model 1

- (GT) covid
- (GT) covid-19
- (GT) chest pain
- (GT) covid symptoms
- (GT) quarantine
- (GT) covid-19 who

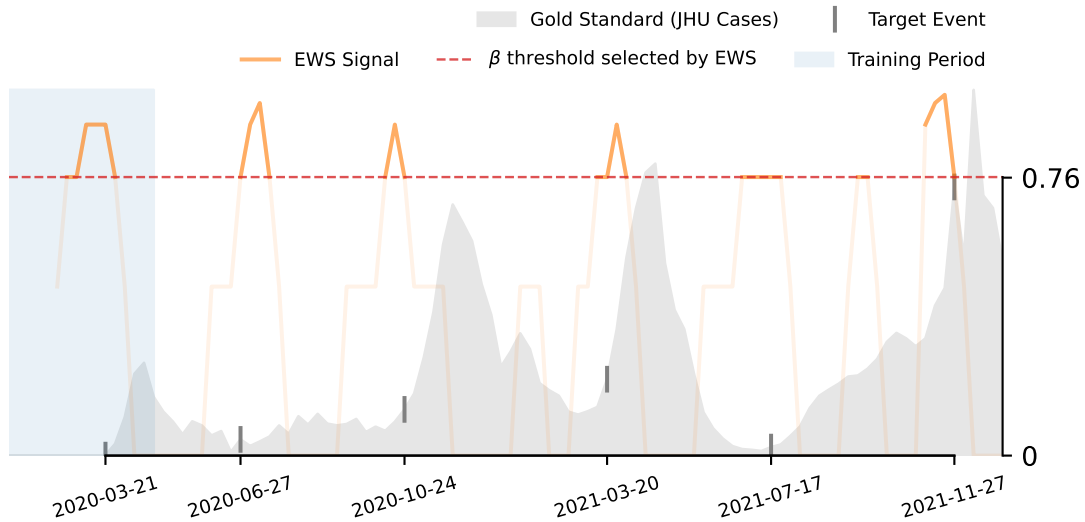

Model 2

- (GT) covid
- (GT) covid-19
- (GT) chest pain
- (GT) Ageusia
- (GT) Anosmia
- (GT) Asthma

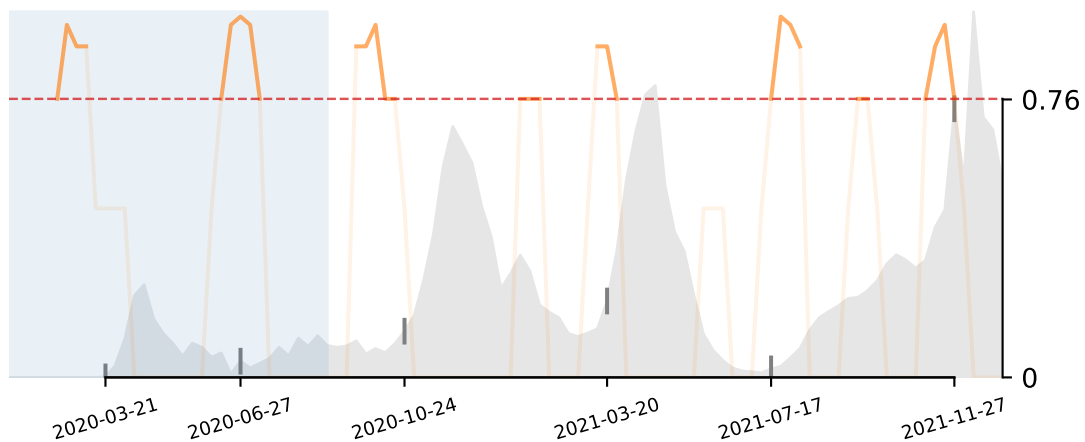

Model 3

- (GT) covid
- (GT) covid-19
- (GT) Ageusia
- (GT) Anosmia
- (GT) Asthma
- (GT) Chills

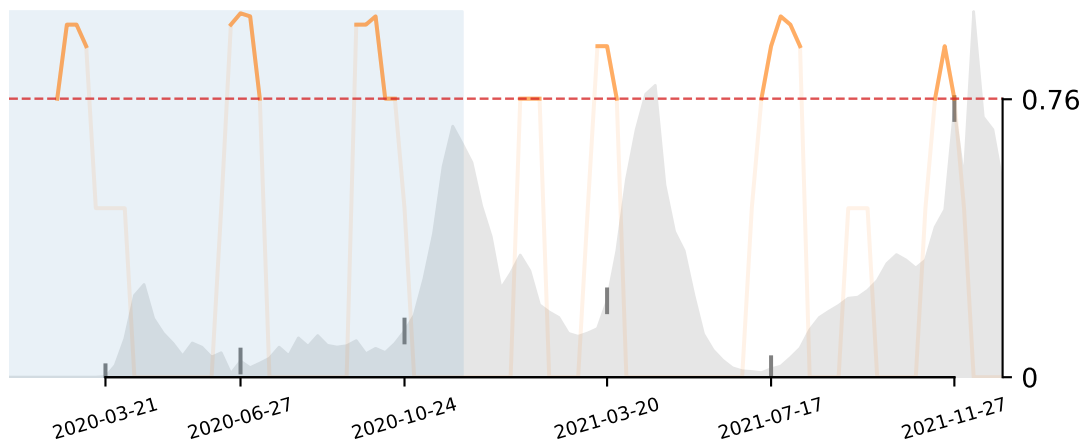

## Performance as a function of $\beta$

| $\beta$ | Training |    |    | Out of sample |    |    |
|---------|----------|----|----|---------------|----|----|
|         | tp       | fp | fn | tp            | fp | fn |
| 1.00    | 0        | 0  | 1  | 0             | 0  | 5  |
| 0.99    | 0        | 0  | 1  | 1             | 0  | 4  |
| 0.96    | 0        | 0  | 1  | 1             | 1  | 3  |
| 0.91    | 0        | 0  | 1  | 2             | 3  | 1  |
| 0.76    | 1        | 0  | 0  | 5             | 8  | 0  |
| 0.46    | 1        | 1  | 0  | 5             | 22 | 0  |
| 0.00    | 1        | 3  | 0  | 5             | 53 | 0  |

| $\beta$ | tp fp fn |   |   | tp fp fn |    |   |
|---------|----------|---|---|----------|----|---|
|         | 1.00     | 0 | 0 | 2        | 0  | 0 |
| 0.99    | 0        | 0 | 2 | 0        | 1  | 3 |
| 0.96    | 1        | 0 | 1 | 2        | 2  | 1 |
| 0.91    | 2        | 1 | 0 | 3        | 3  | 0 |
| 0.76    | 2        | 1 | 0 | 4        | 9  | 0 |
| 0.46    | 2        | 3 | 0 | 4        | 13 | 0 |
| 0.00    | 2        | 5 | 0 | 4        | 42 | 0 |

| $\beta$ | tp fp fn |   |   | tp fp fn |    |   |
|---------|----------|---|---|----------|----|---|
|         | 1.00     | 0 | 0 | 3        | 0  | 0 |
| 0.99    | 1        | 0 | 2 | 0        | 1  | 2 |
| 0.96    | 2        | 1 | 1 | 0        | 2  | 2 |
| 0.91    | 3        | 2 | 0 | 3        | 3  | 0 |
| 0.76    | 3        | 2 | 0 | 3        | 7  | 0 |
| 0.46    | 3        | 4 | 0 | 3        | 11 | 0 |
| 0.00    | 3        | 6 | 0 | 3        | 35 | 0 |

## Proxies selected by the Multiple Sources method

Model 1

- (GT) covid
- (GT) covid-19
- (GT) covid symptoms
- (GT) quarantine
- (GT) covid-19 who
- (GT) Nasal congestion

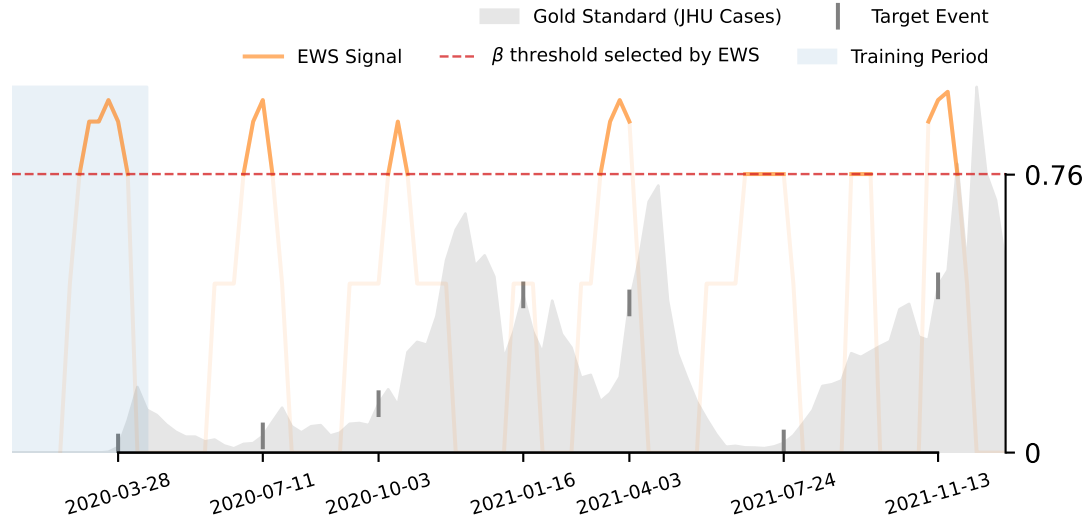

Model 2

- (GT) covid
- (GT) covid-19
- (GT) covid symptoms
- (GT) quarantine
- (GT) Nasal congestion
- (GT) Phlegm

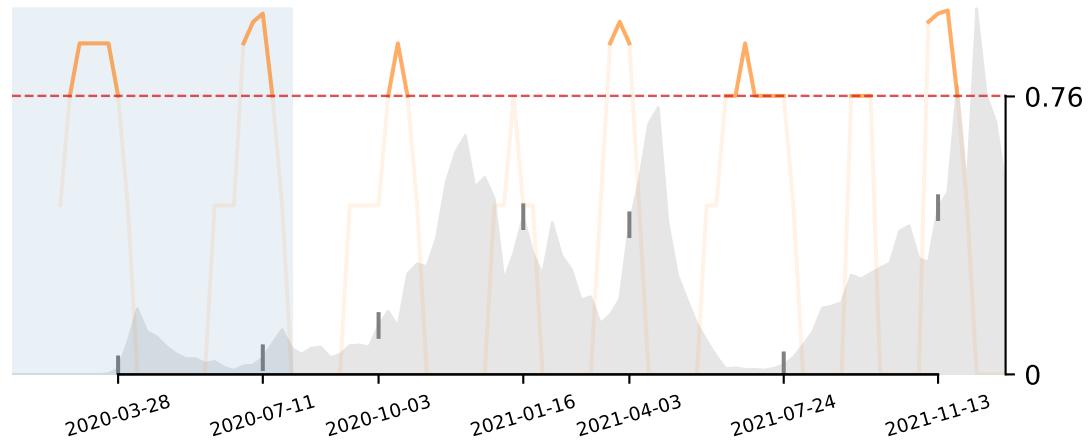

Model 3

- (GT) covid-19
- (GT) covid symptoms
- (GT) loss smell
- (GT) Nasal congestion
- (GT) Phlegm
- (GT) covid

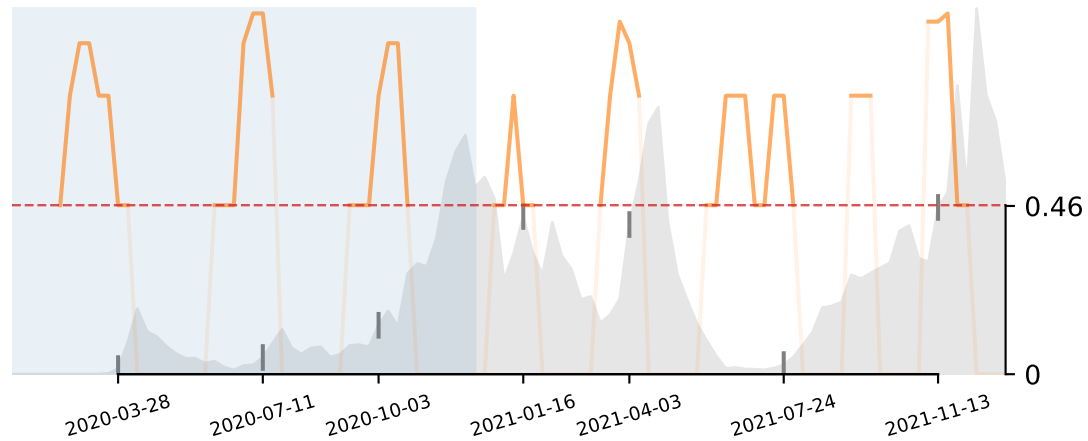

## Performance as a function of $\beta$

| $\beta$ | Training |    |    | Out of sample |    |    |
|---------|----------|----|----|---------------|----|----|
|         | tp       | fp | fn | tp            | fp | fn |
| 1.00    | 0        | 0  | 1  | 0             | 0  | 6  |
| 0.99    | 0        | 0  | 1  | 0             | 1  | 5  |
| 0.96    | 0        | 0  | 1  | 3             | 1  | 3  |
| 0.91    | 1        | 0  | 0  | 3             | 2  | 2  |
| 0.76    | 1        | 0  | 0  | 4             | 9  | 1  |
| 0.46    | 1        | 1  | 0  | 6             | 20 | 0  |
| 0.00    | 1        | 2  | 0  | 6             | 47 | 0  |

| $\beta$ | tp |    |    | fp |    |    | fn |    |    |
|---------|----|----|----|----|----|----|----|----|----|
|         | tp | fp | fn | tp | fp | fn | tp | fp | fn |
| 1.00    | 0  | 0  | 2  | 0  | 1  | 4  | 0  | 1  | 4  |
| 0.99    | 0  | 0  | 2  | 1  | 1  | 4  | 1  | 1  | 4  |
| 0.96    | 1  | 0  | 1  | 2  | 1  | 3  | 2  | 1  | 3  |
| 0.91    | 1  | 0  | 1  | 3  | 2  | 1  | 3  | 2  | 1  |
| 0.76    | 2  | 0  | 0  | 4  | 8  | 0  | 4  | 8  | 0  |
| 0.46    | 2  | 2  | 0  | 5  | 15 | 0  | 5  | 15 | 0  |
| 0.00    | 2  | 6  | 0  | 5  | 39 | 0  | 5  | 39 | 0  |

| $\beta$ | tp |    |    | fp |    |    | fn |    |    |
|---------|----|----|----|----|----|----|----|----|----|
|         | tp | fp | fn | tp | fp | fn | tp | fp | fn |
| 1.00    | 0  | 0  | 3  | 0  | 0  | 4  | 0  | 0  | 4  |
| 0.99    | 0  | 0  | 3  | 0  | 1  | 3  | 0  | 1  | 3  |
| 0.96    | 1  | 0  | 2  | 2  | 1  | 2  | 2  | 1  | 2  |
| 0.91    | 1  | 0  | 2  | 2  | 1  | 2  | 2  | 1  | 2  |
| 0.76    | 2  | 2  | 1  | 4  | 5  | 0  | 4  | 5  | 0  |
| 0.46    | 3  | 4  | 0  | 4  | 11 | 0  | 4  | 11 | 0  |
| 0.00    | 3  | 8  | 0  | 4  | 29 | 0  | 4  | 29 | 0  |

## Proxies selected by the Multiple Sources method

Model 1

- (GT) covid
- (GT) covid-19
- (GT) chest pain
- (GT) covid symptoms
- (GT) quarantine
- (GT) covid-19 who

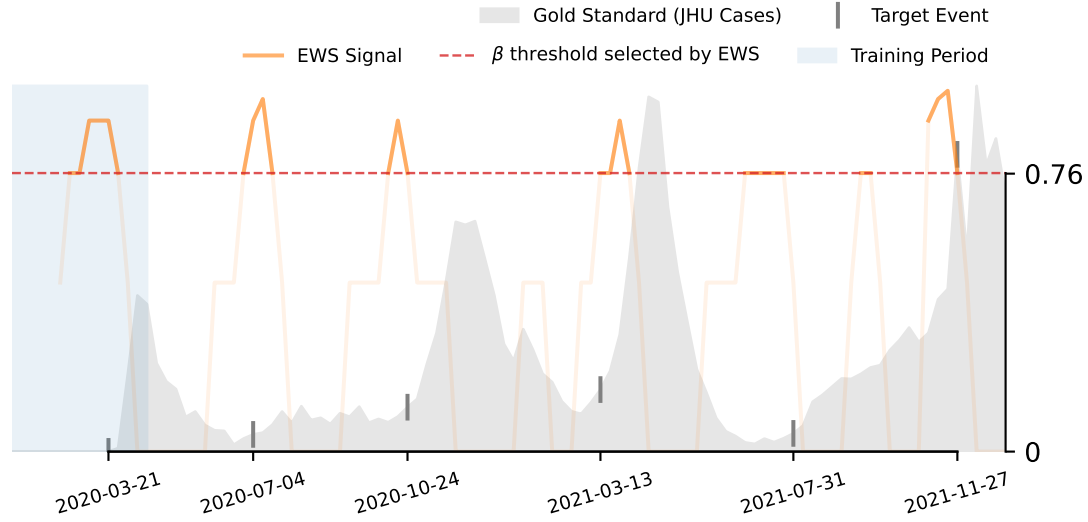

Model 2

- (GT) covid
- (GT) covid-19
- (GT) chest pain
- (GT) covid symptoms
- (GT) Ageusia
- (GT) Anosmia

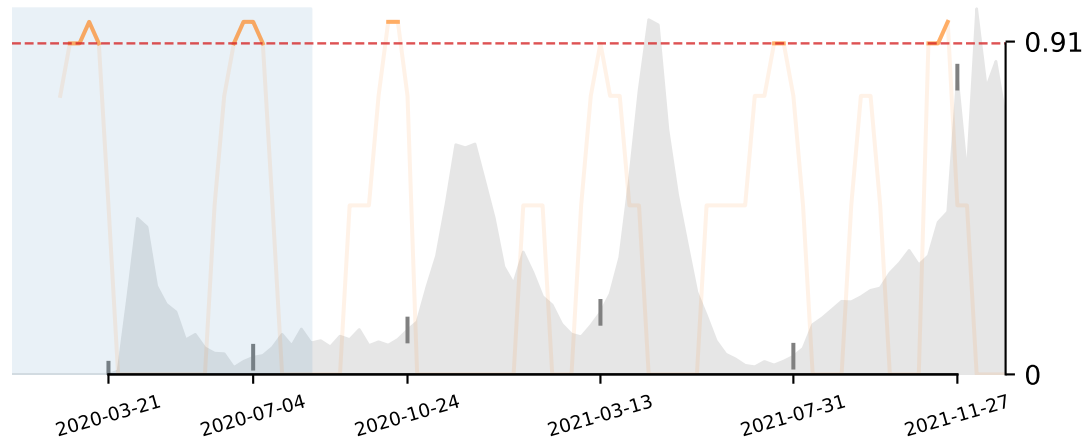

Model 3

- (GT) covid
- (GT) covid-19
- (GT) covid symptoms
- (GT) Ageusia
- (GT) Anosmia
- (GT) Asthma

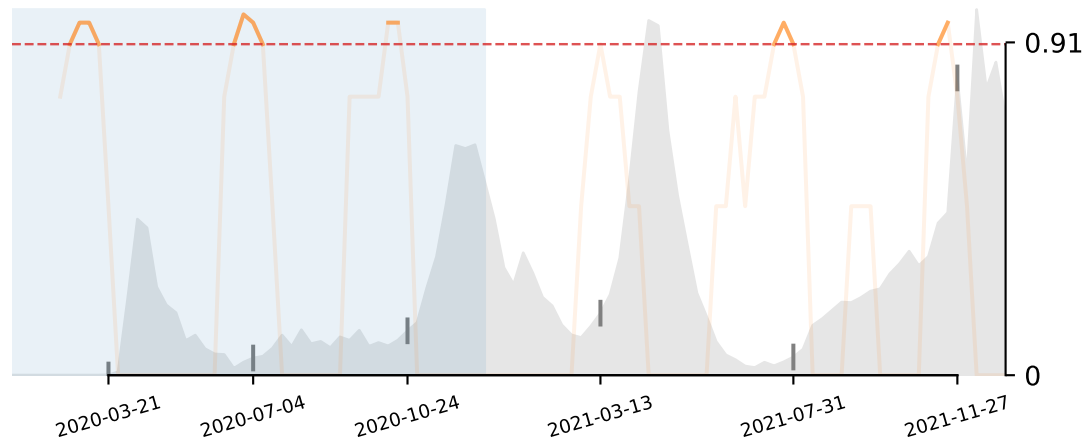

## Performance as a function of $\beta$

| $\beta$ | Training |    |    | Out of sample |    |    |
|---------|----------|----|----|---------------|----|----|
|         | tp       | fp | fn | tp            | fp | fn |
| 1.00    | 0        | 0  | 1  | 0             | 0  | 5  |
| 0.99    | 0        | 0  | 1  | 1             | 0  | 4  |
| 0.96    | 0        | 0  | 1  | 1             | 1  | 3  |
| 0.91    | 0        | 0  | 1  | 3             | 2  | 1  |
| 0.76    | 1        | 0  | 0  | 5             | 7  | 0  |
| 0.46    | 1        | 1  | 0  | 5             | 21 | 0  |
| 0.00    | 1        | 3  | 0  | 5             | 54 | 0  |

| $\beta$ | tp fp fn |   |   | tp fp fn |    |   |
|---------|----------|---|---|----------|----|---|
|         | 1.00     | 0 | 0 | 2        | 0  | 0 |
| 0.99    | 0        | 0 | 2 | 0        | 0  | 4 |
| 0.96    | 0        | 0 | 2 | 2        | 0  | 2 |
| 0.91    | 2        | 0 | 0 | 4        | 0  | 0 |
| 0.76    | 2        | 1 | 0 | 4        | 4  | 0 |
| 0.46    | 2        | 2 | 0 | 4        | 15 | 0 |
| 0.00    | 2        | 3 | 0 | 4        | 44 | 0 |

| $\beta$ | tp fp fn |   |   | tp fp fn |    |   |
|---------|----------|---|---|----------|----|---|
|         | 1.00     | 0 | 0 | 3        | 0  | 0 |
| 0.99    | 0        | 0 | 3 | 0        | 0  | 3 |
| 0.96    | 1        | 0 | 2 | 2        | 0  | 1 |
| 0.91    | 3        | 0 | 0 | 3        | 0  | 0 |
| 0.76    | 3        | 1 | 0 | 3        | 3  | 0 |
| 0.46    | 3        | 4 | 0 | 3        | 11 | 0 |
| 0.00    | 3        | 5 | 0 | 3        | 33 | 0 |

## Proxies selected by the Multiple Sources method

Model 1

- (GT) covid
- (GT) covid-19
- (GT) covid symptoms
- (GT) chest tightness
- (GT) fever
- (GT) Acute bronchitis

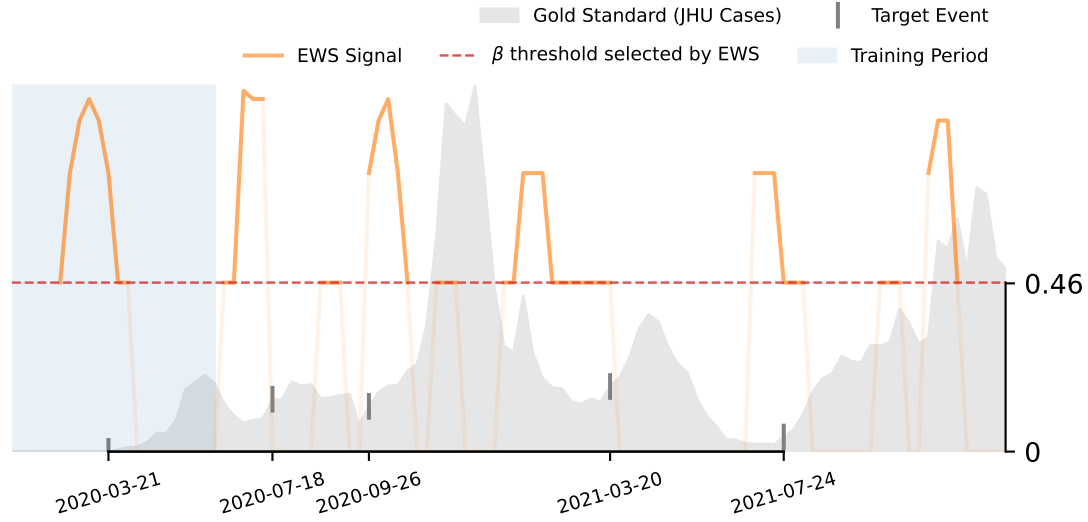

Model 2

- (GT) covid
- (GT) covid-19
- (GT) covid symptoms
- (GT) fever
- (GT) Acute bronchitis
- (GT) Anosmia

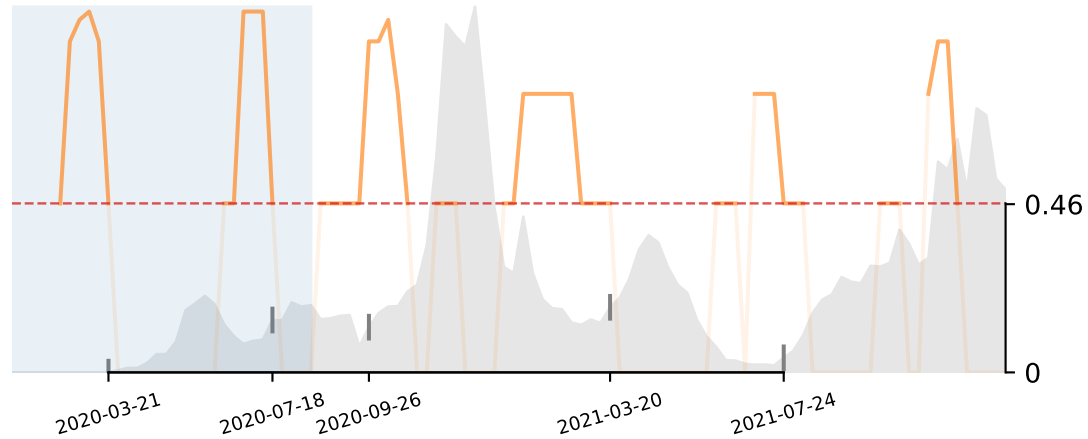

Model 3

- (GT) covid symptoms
- (GT) Acute bronchitis
- (GT) Anosmia
- (GT) Bronchitis
- (GT) Cough
- (GT) Phlegm

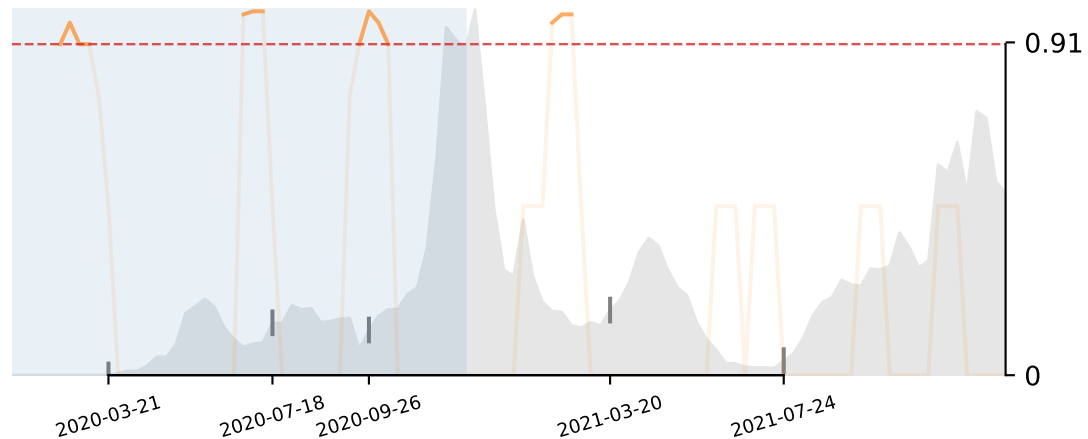

## Performance as a function of $\beta$

| $\beta$ | Training |    |    | Out of sample |    |    |
|---------|----------|----|----|---------------|----|----|
|         | tp       | fp | fn | tp            | fp | fn |
| 1.00    | 0        | 0  | 1  | 0             | 0  | 4  |
| 0.99    | 0        | 0  | 1  | 1             | 0  | 3  |
| 0.96    | 0        | 0  | 1  | 1             | 1  | 2  |
| 0.91    | 1        | 0  | 0  | 1             | 4  | 2  |
| 0.76    | 1        | 0  | 0  | 3             | 9  | 1  |
| 0.46    | 1        | 0  | 0  | 4             | 21 | 0  |
| 0.00    | 1        | 3  | 0  | 4             | 55 | 0  |

| $\beta$ | tp |    |    | fp |    |    | fn |    |    |
|---------|----|----|----|----|----|----|----|----|----|
|         | tp | fp | fn | tp | fp | fn | tp | fp | fn |
| 1.00    | 0  | 0  | 2  | 0  | 0  | 3  | 0  | 0  | 3  |
| 0.99    | 0  | 0  | 2  | 0  | 0  | 3  | 0  | 0  | 3  |
| 0.96    | 2  | 0  | 0  | 0  | 1  | 2  | 0  | 1  | 2  |
| 0.91    | 2  | 0  | 0  | 1  | 4  | 2  | 1  | 4  | 2  |
| 0.76    | 2  | 0  | 0  | 3  | 9  | 0  | 3  | 9  | 0  |
| 0.46    | 2  | 0  | 0  | 3  | 22 | 0  | 3  | 22 | 0  |
| 0.00    | 2  | 2  | 0  | 3  | 52 | 0  | 3  | 52 | 0  |

| $\beta$ | tp |    |    | fp |    |    | fn |    |    |
|---------|----|----|----|----|----|----|----|----|----|
|         | tp | fp | fn | tp | fp | fn | tp | fp | fn |
| 1.00    | 0  | 0  | 3  | 0  | 0  | 2  | 0  | 0  | 2  |
| 0.99    | 2  | 0  | 1  | 1  | 0  | 1  | 1  | 0  | 1  |
| 0.96    | 2  | 0  | 1  | 1  | 0  | 1  | 1  | 0  | 1  |
| 0.91    | 3  | 1  | 0  | 1  | 0  | 1  | 1  | 0  | 1  |
| 0.76    | 3  | 3  | 0  | 1  | 0  | 1  | 1  | 0  | 1  |
| 0.46    | 3  | 3  | 0  | 2  | 10 | 0  | 2  | 10 | 0  |
| 0.00    | 3  | 3  | 0  | 2  | 42 | 0  | 2  | 42 | 0  |

## Proxies selected by the Multiple Sources method

Model 1

- (GT) covid-19 who
- (GT) covid
- (GT) covid-19
- (GT) covid symptoms
- (GT) Bronchitis
- (GT) Cardiac arrest

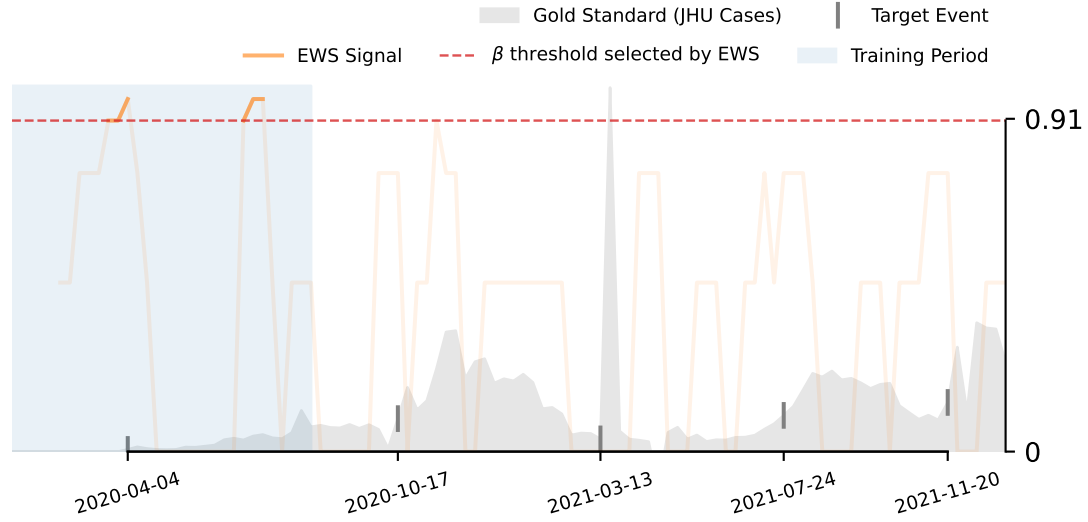

Model 2

- (GT) covid-19
- (GT) covid

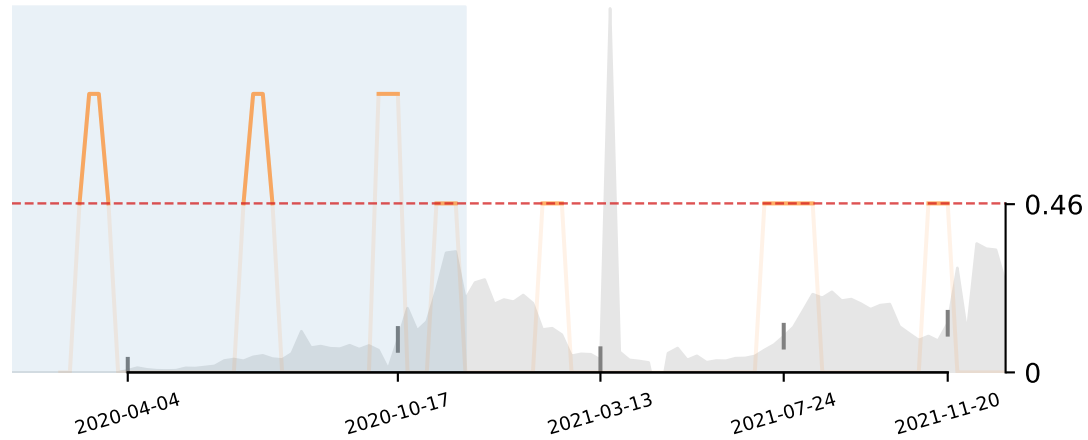

Model 3

- (GT) covid-19
- (GT) covid
- (GT) Cough
- (GT) Fever
- (GT) Otitis
- (GT) Sore throat

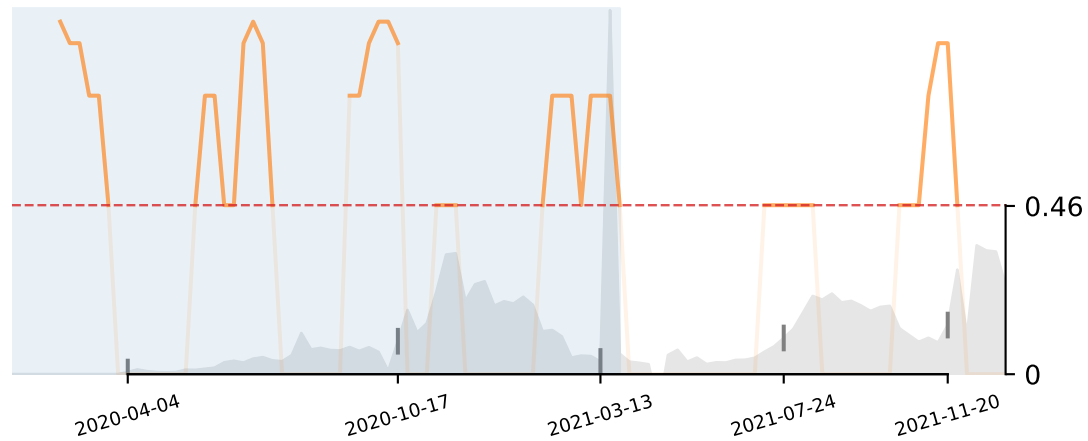

## Performance as a function of $\beta$

| $\beta$ | Training |    |    | Out of sample |    |    |
|---------|----------|----|----|---------------|----|----|
|         | tp       | fp | fn | tp            | fp | fn |
| 1.00    | 0        | 0  | 1  | 0             | 0  | 4  |
| 0.99    | 0        | 0  | 1  | 0             | 0  | 4  |
| 0.96    | 0        | 0  | 1  | 0             | 0  | 4  |
| 0.91    | 1        | 2  | 0  | 0             | 1  | 4  |
| 0.76    | 1        | 3  | 0  | 3             | 8  | 1  |
| 0.46    | 1        | 5  | 0  | 4             | 26 | 0  |
| 0.00    | 1        | 12 | 0  | 4             | 44 | 0  |

| $\beta$ | tp fp fn |   |   | tp fp fn |    |   |
|---------|----------|---|---|----------|----|---|
|         | 0.76     | 0 | 0 | 2        | 0  | 0 |
| 0.46    | 2        | 2 | 0 | 3        | 3  | 0 |
| 0.00    | 2        | 8 | 0 | 3        | 35 | 0 |

| $\beta$ | tp fp fn |    |   | tp fp fn |    |   |
|---------|----------|----|---|----------|----|---|
|         | 1.00     | 0  | 0 | 3        | 0  | 0 |
| 0.99    | 0        | 0  | 3 | 0        | 0  | 2 |
| 0.96    | 0        | 0  | 3 | 0        | 0  | 2 |
| 0.91    | 1        | 2  | 2 | 1        | 0  | 1 |
| 0.76    | 1        | 6  | 2 | 1        | 0  | 1 |
| 0.46    | 3        | 11 | 0 | 2        | 4  | 0 |
| 0.00    | 3        | 20 | 0 | 2        | 26 | 0 |

## Proxies selected by the Multiple Sources method

Model 1

- (GT) covid
- (GT) covid-19
- (GT) chest pain
- (GT) covid symptoms
- (GT) covid-19 who
- (GT) Acute bronchitis

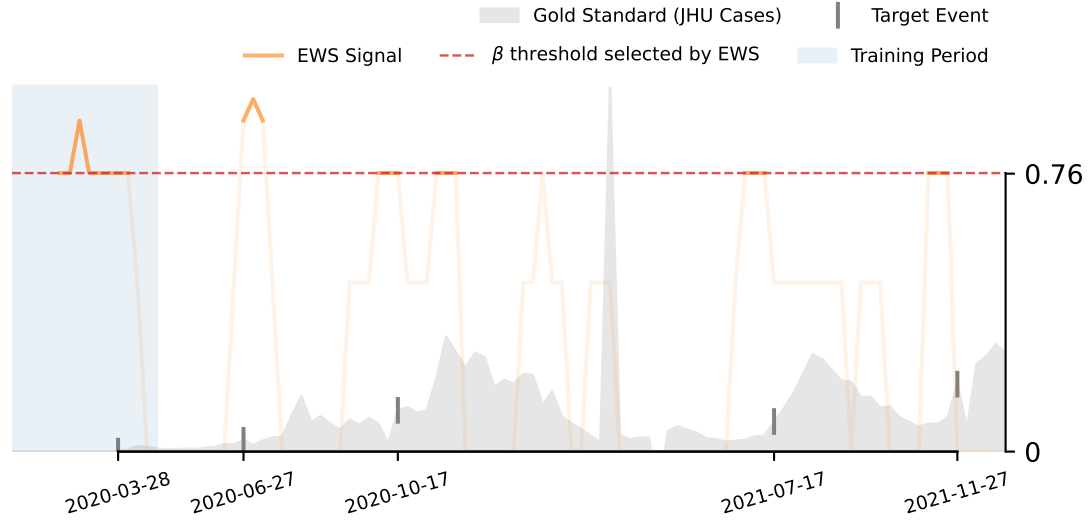

Model 2

- (GT) covid
- (GT) covid symptoms
- (GT) Acute bronchitis
- (GT) Asthma
- (GT) Bronchitis
- (GT) Chest pain

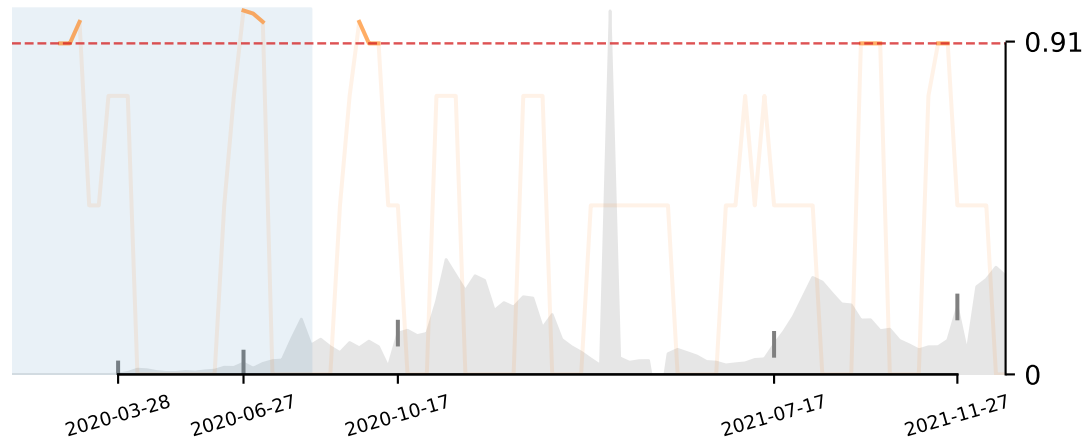

Model 3

- (GT) Acute bronchitis
- (GT) Asthma
- (GT) Bronchitis
- (GT) Chest pain
- (GT) Cough
- (GT) Phlegm

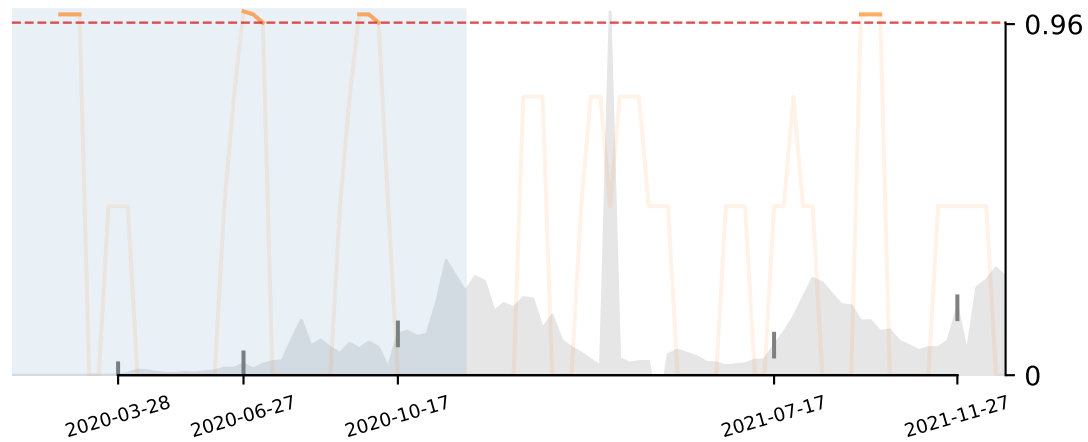

## Performance as a function of $\beta$

| $\beta$ | Training |    |    | Out of sample |    |    |
|---------|----------|----|----|---------------|----|----|
|         | tp       | fp | fn | tp            | fp | fn |
| 1.00    | 0        | 0  | 1  | 0             | 0  | 4  |
| 0.99    | 0        | 0  | 1  | 0             | 0  | 4  |
| 0.96    | 0        | 0  | 1  | 0             | 1  | 3  |
| 0.91    | 0        | 0  | 1  | 1             | 2  | 3  |
| 0.76    | 1        | 0  | 0  | 4             | 6  | 0  |
| 0.46    | 1        | 3  | 0  | 4             | 27 | 0  |
| 0.00    | 1        | 4  | 0  | 4             | 60 | 0  |

| $\beta$ | tp |    |    | fp |    |    | fn |    |    |
|---------|----|----|----|----|----|----|----|----|----|
|         | tp | fp | fn | tp | fp | fn | tp | fp | fn |
| 1.00    | 0  | 0  | 2  | 0  | 0  | 3  | 0  | 0  | 3  |
| 0.99    | 1  | 0  | 1  | 0  | 0  | 3  | 0  | 0  | 3  |
| 0.96    | 1  | 1  | 1  | 1  | 0  | 2  | 1  | 0  | 2  |
| 0.91    | 2  | 2  | 0  | 2  | 3  | 1  | 2  | 3  | 1  |
| 0.76    | 2  | 4  | 0  | 3  | 9  | 0  | 3  | 9  | 0  |
| 0.46    | 2  | 5  | 0  | 3  | 25 | 0  | 3  | 25 | 0  |
| 0.00    | 2  | 5  | 0  | 3  | 51 | 0  | 3  | 51 | 0  |

| $\beta$ | tp |    |    | fp |    |    | fn |    |    |
|---------|----|----|----|----|----|----|----|----|----|
|         | tp | fp | fn | tp | fp | fn | tp | fp | fn |
| 1.00    | 0  | 0  | 3  | 0  | 0  | 2  | 0  | 0  | 2  |
| 0.99    | 1  | 0  | 2  | 0  | 3  | 2  | 0  | 3  | 2  |
| 0.96    | 3  | 3  | 0  | 0  | 3  | 2  | 0  | 3  | 2  |
| 0.91    | 3  | 4  | 0  | 0  | 3  | 2  | 0  | 3  | 2  |
| 0.76    | 3  | 4  | 0  | 0  | 12 | 1  | 0  | 12 | 1  |
| 0.46    | 3  | 5  | 0  | 2  | 23 | 0  | 2  | 23 | 0  |
| 0.00    | 3  | 7  | 0  | 2  | 42 | 0  | 2  | 42 | 0  |

## Proxies selected by the Multiple Sources method

Model 1

- (GT) covid
- (GT) how long does covid last
- (GT) covid-19
- (GT) chest pain
- (GT) covid symptoms
- (GT) Ageusia

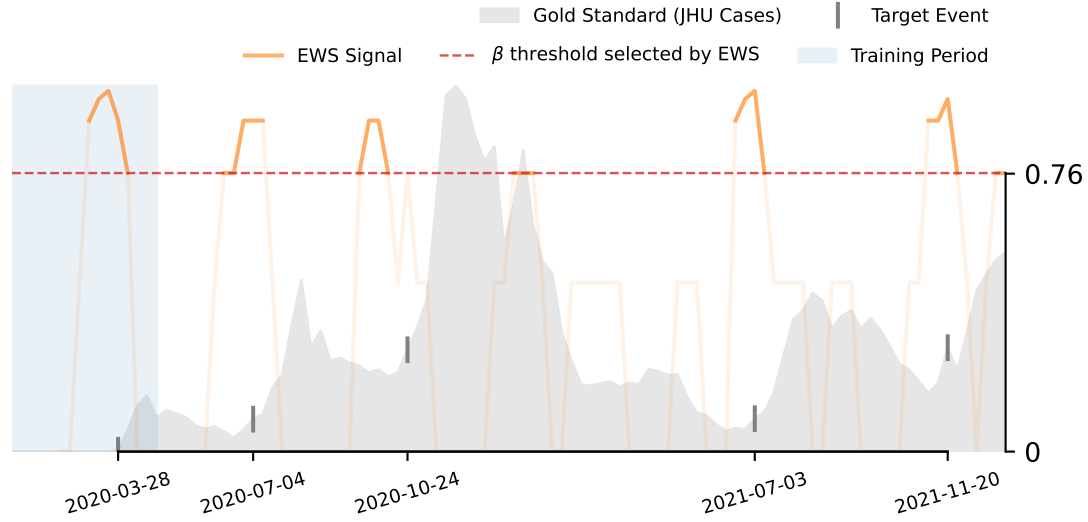

Model 2

- (GT) covid
- (GT) covid-19
- (GT) chest pain
- (GT) covid symptoms
- (GT) Ageusia
- (GT) Phlegm

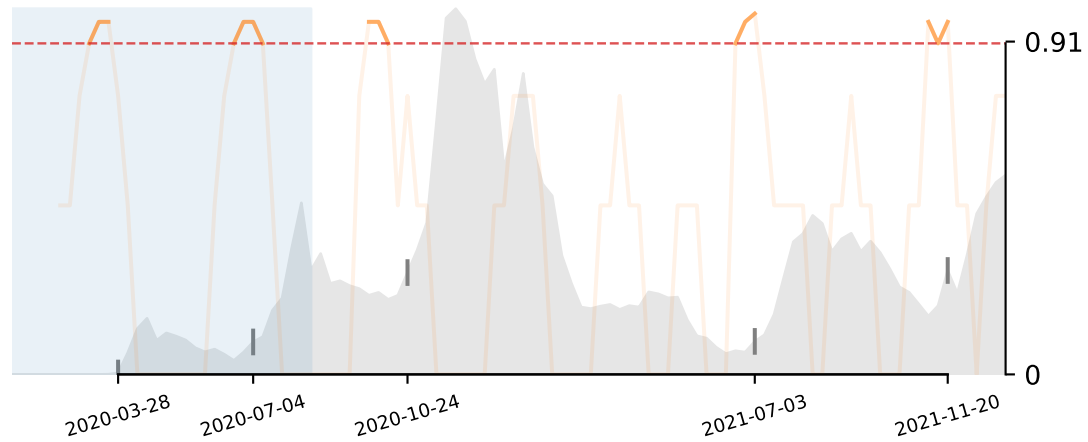

Model 3

- (GT) covid
- (GT) covid-19
- (GT) chest pain
- (GT) covid symptoms
- (GT) Ageusia
- (GT) Phlegm

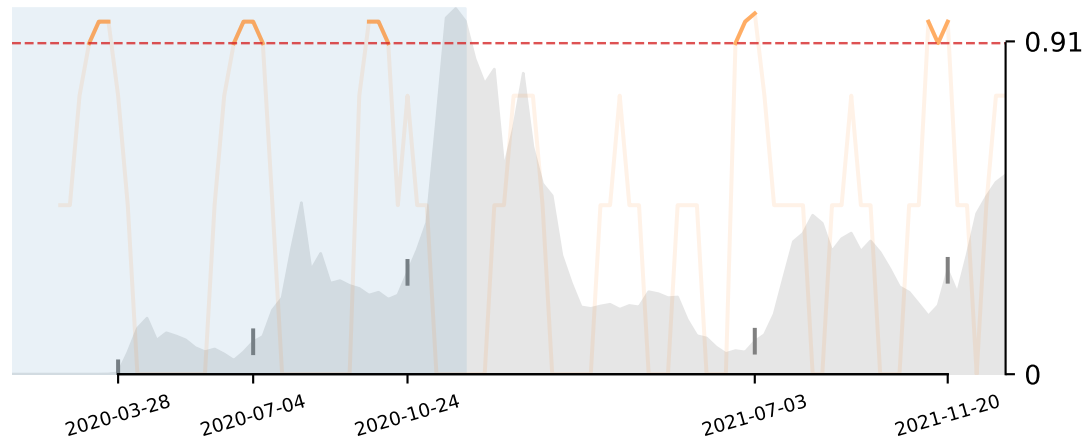

## Performance as a function of $\beta$

| $\beta$ | Training |    |    | Out of sample |    |    |
|---------|----------|----|----|---------------|----|----|
|         | tp       | fp | fn | tp            | fp | fn |
| 1.00    | 0        | 0  | 1  | 0             | 0  | 4  |
| 0.99    | 0        | 0  | 1  | 1             | 0  | 3  |
| 0.96    | 1        | 0  | 0  | 2             | 0  | 2  |
| 0.91    | 1        | 0  | 0  | 4             | 1  | 0  |
| 0.76    | 1        | 0  | 0  | 4             | 8  | 0  |
| 0.46    | 1        | 1  | 0  | 4             | 31 | 0  |
| 0.00    | 1        | 1  | 0  | 4             | 60 | 0  |

| $\beta$ | tp fp fn |   |   | tp fp fn |    |   |
|---------|----------|---|---|----------|----|---|
|         | 1.00     | 0 | 0 | 2        | 0  | 0 |
| 0.99    | 0        | 0 | 2 | 1        | 0  | 2 |
| 0.96    | 0        | 0 | 2 | 3        | 0  | 0 |
| 0.91    | 2        | 0 | 0 | 3        | 0  | 0 |
| 0.76    | 2        | 1 | 0 | 3        | 8  | 0 |
| 0.46    | 2        | 1 | 0 | 3        | 30 | 0 |
| 0.00    | 2        | 5 | 0 | 3        | 51 | 0 |

| $\beta$ | tp fp fn |   |   | tp fp fn |    |   |
|---------|----------|---|---|----------|----|---|
|         | 1.00     | 0 | 0 | 3        | 0  | 0 |
| 0.99    | 0        | 0 | 3 | 1        | 0  | 1 |
| 0.96    | 0        | 0 | 3 | 2        | 0  | 0 |
| 0.91    | 3        | 0 | 0 | 2        | 0  | 0 |
| 0.76    | 3        | 1 | 0 | 2        | 8  | 0 |
| 0.46    | 3        | 2 | 0 | 2        | 28 | 0 |
| 0.00    | 3        | 8 | 0 | 2        | 42 | 0 |



## Proxies selected by the Multiple Sources method

Model 1

- (GT) covid
- (GT) covid-19
- (GT) covid symptoms
- (GT) Chest pain
- (GT) Dizziness
- (GT) Fatigue

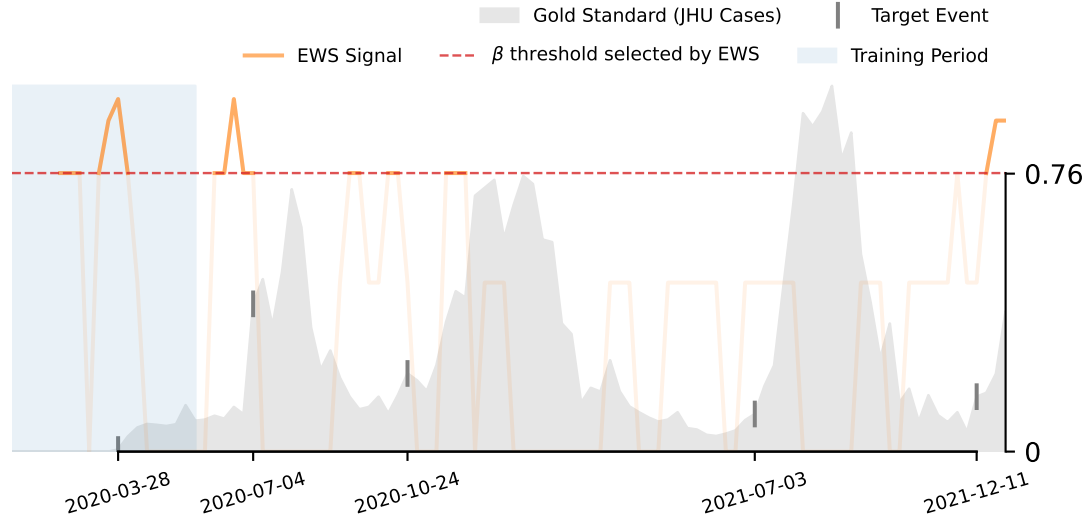

Model 2

- (GT) covid-19
- (GT) covid symptoms
- (GT) Abdominal pain
- (GT) Chest pain
- (GT) Fatigue
- (GT) Pneumonia

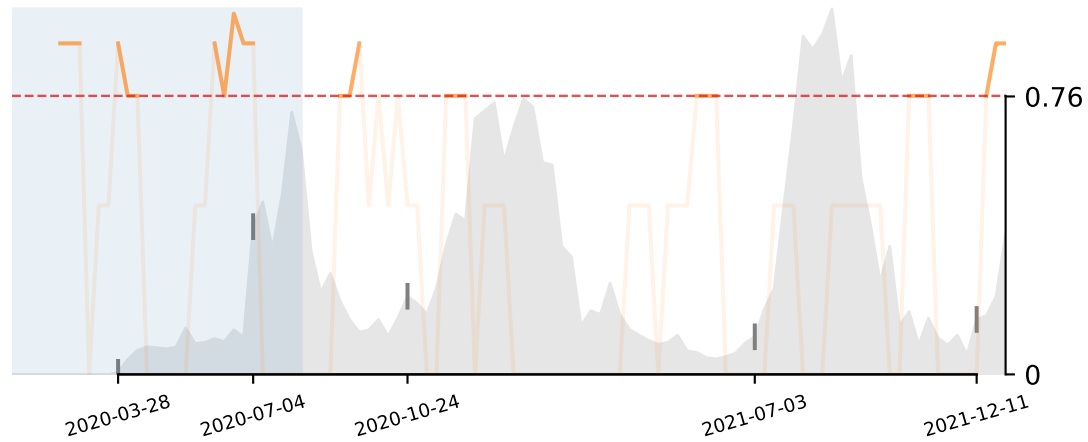

Model 3

- (GT) Pneumonia up2date
- (GT) covid-19
- (GT) Abdominal pain
- (GT) covid
- (GT) Chest pain

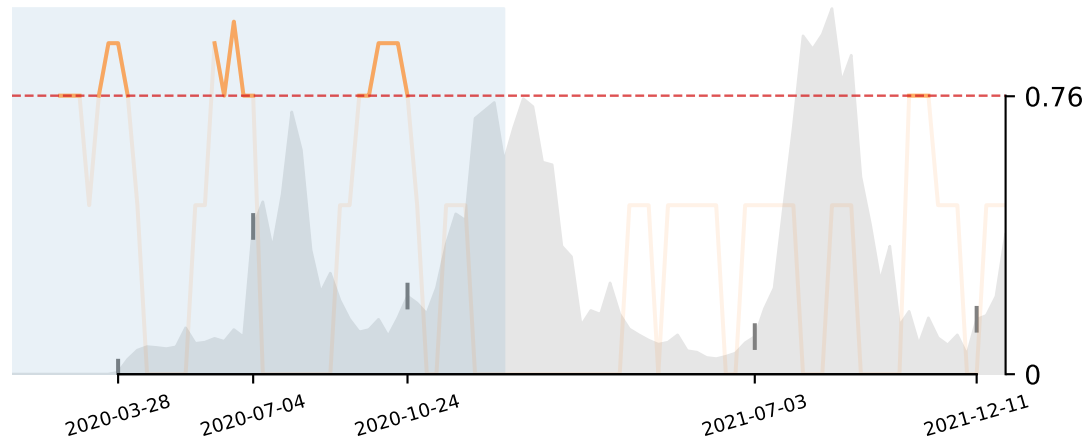

## Performance as a function of $\beta$

| $\beta$ | Training |    |    | Out of sample |    |    |
|---------|----------|----|----|---------------|----|----|
|         | tp       | fp | fn | tp            | fp | fn |
| 1.00    | 0        | 0  | 1  | 0             | 0  | 4  |
| 0.99    | 0        | 0  | 1  | 0             | 0  | 4  |
| 0.96    | 0        | 0  | 1  | 1             | 0  | 3  |
| 0.91    | 1        | 0  | 0  | 1             | 2  | 2  |
| 0.76    | 1        | 0  | 0  | 3             | 6  | 1  |
| 0.46    | 1        | 3  | 0  | 4             | 24 | 0  |
| 0.00    | 1        | 4  | 0  | 4             | 57 | 0  |

| $\beta$ | tp fp fn |   |   | tp fp fn |    |   |
|---------|----------|---|---|----------|----|---|
|         | 1.00     | 0 | 0 | 2        | 0  | 0 |
| 0.99    | 0        | 0 | 2 | 0        | 0  | 3 |
| 0.96    | 1        | 0 | 1 | 0        | 0  | 3 |
| 0.91    | 1        | 0 | 1 | 1        | 2  | 1 |
| 0.76    | 2        | 2 | 0 | 3        | 8  | 0 |
| 0.46    | 2        | 4 | 0 | 3        | 27 | 0 |
| 0.00    | 2        | 6 | 0 | 3        | 52 | 0 |

| $\beta$ | tp fp fn |    |   | tp fp fn |    |   |
|---------|----------|----|---|----------|----|---|
|         | 1.00     | 0  | 0 | 3        | 0  | 0 |
| 0.99    | 0        | 0  | 3 | 0        | 0  | 2 |
| 0.96    | 0        | 0  | 3 | 0        | 0  | 2 |
| 0.91    | 1        | 0  | 2 | 0        | 0  | 2 |
| 0.76    | 3        | 0  | 0 | 1        | 1  | 1 |
| 0.46    | 3        | 4  | 0 | 2        | 17 | 0 |
| 0.00    | 3        | 13 | 0 | 2        | 38 | 0 |

## Proxies selected by the Multiple Sources method

Model 1

- (GT) chest tightness
- (GT) covid-19 who
- (GT) covid
- (GT) loss smell
- (GT) covid-19
- (GT) covid symptoms

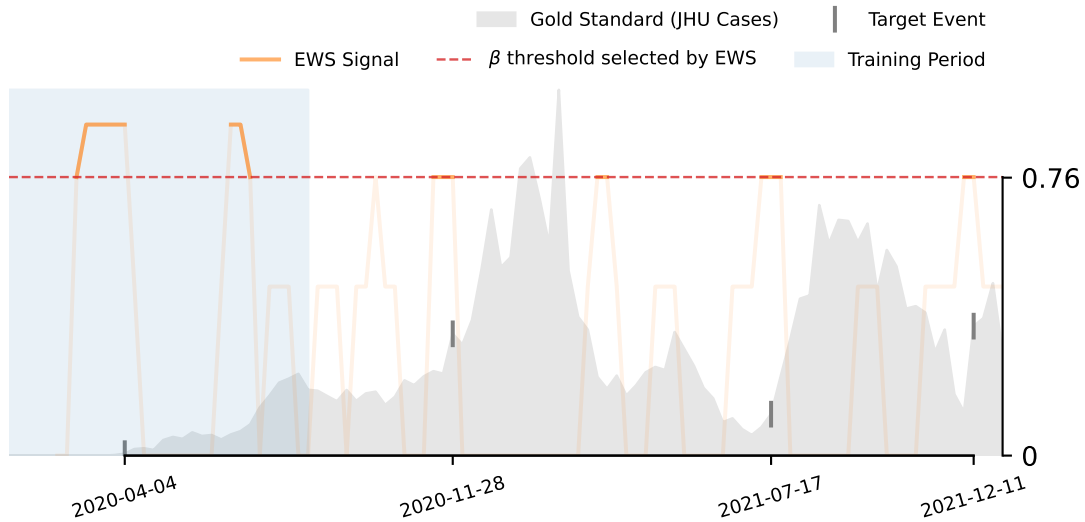

Model 2

- (GT) covid
- (GT) how long does covid last
- (GT) covid-19

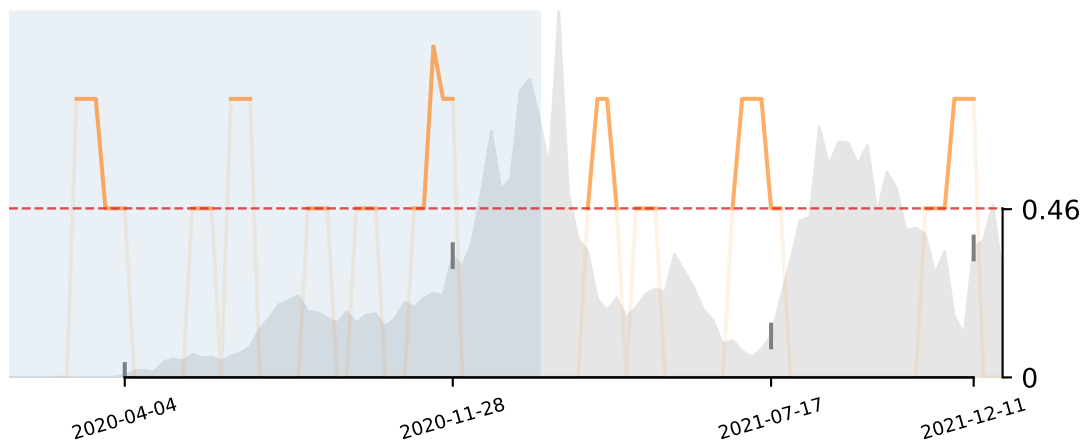

Model 3

- (GT) covid
- (GT) how long does covid last
- (GT) covid-19
- (GT) covid symptoms
- (GT) Vomiting
- (GT) Fever

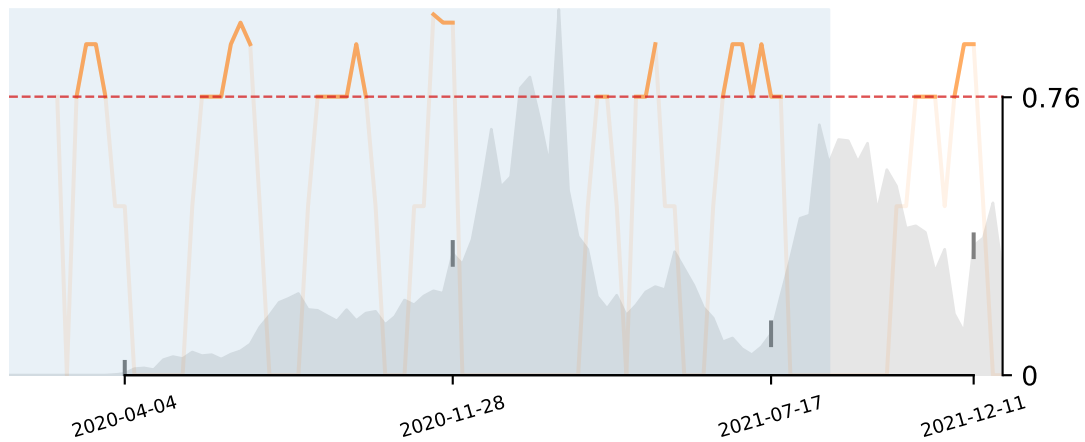

## Performance as a function of $\beta$

| $\beta$ | Training |    |    | Out of sample |    |    |
|---------|----------|----|----|---------------|----|----|
|         | tp       | fp | fn | tp            | fp | fn |
| 1.00    | 0        | 0  | 1  | 0             | 0  | 3  |
| 0.99    | 0        | 0  | 1  | 0             | 0  | 3  |
| 0.96    | 0        | 0  | 1  | 0             | 0  | 3  |
| 0.91    | 0        | 0  | 1  | 0             | 0  | 3  |
| 0.76    | 1        | 2  | 0  | 3             | 4  | 0  |
| 0.46    | 1        | 4  | 0  | 3             | 21 | 0  |
| 0.00    | 1        | 9  | 0  | 3             | 51 | 0  |

| $\beta$ | tp fp fn |    |   | tp fp fn |    |   |
|---------|----------|----|---|----------|----|---|
|         | 0.91     | 0  | 0 | 2        | 0  | 0 |
| 0.76    | 1        | 0  | 1 | 2        | 2  | 0 |
| 0.46    | 2        | 4  | 0 | 2        | 8  | 0 |
| 0.00    | 2        | 13 | 0 | 2        | 34 | 0 |

| $\beta$ | tp fp fn |    |   | tp fp fn |    |   |
|---------|----------|----|---|----------|----|---|
|         | 1.00     | 0  | 0 | 3        | 0  | 0 |
| 0.99    | 0        | 0  | 3 | 0        | 0  | 1 |
| 0.96    | 1        | 0  | 2 | 0        | 0  | 1 |
| 0.91    | 1        | 1  | 2 | 1        | 0  | 0 |
| 0.76    | 3        | 5  | 0 | 1        | 0  | 0 |
| 0.46    | 3        | 21 | 0 | 1        | 3  | 0 |
| 0.00    | 3        | 30 | 0 | 1        | 11 | 0 |

## Proxies selected by the Multiple Sources method

Model 1

- (GT) covid
- (GT) Bronchitis
- (GT) Throat irritation
- (GT) Wheeze
- (GT) covid-19
- (GT) covid symptoms

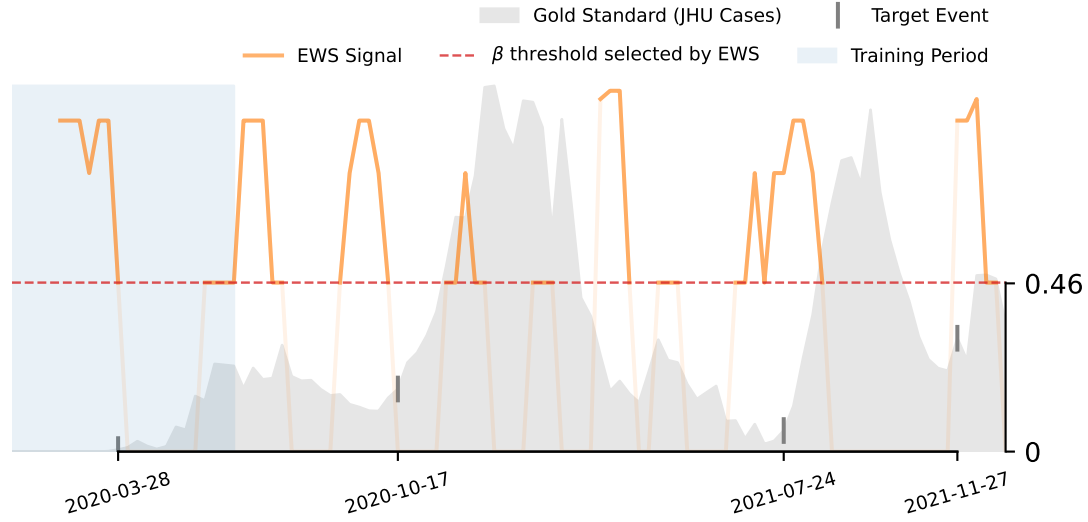

## Performance as a function of $\beta$

| $\beta$ | Training |    |    | Out of sample |    |    |
|---------|----------|----|----|---------------|----|----|
|         | tp       | fp | fn | tp            | fp | fn |
| 1.00    | 0        | 0  | 1  | 0             | 0  | 3  |
| 0.99    | 0        | 0  | 1  | 0             | 2  | 3  |
| 0.96    | 0        | 0  | 1  | 0             | 4  | 2  |
| 0.91    | 0        | 0  | 1  | 2             | 10 | 0  |
| 0.76    | 1        | 2  | 0  | 3             | 12 | 0  |
| 0.46    | 1        | 2  | 0  | 3             | 28 | 0  |
| 0.00    | 1        | 6  | 0  | 3             | 59 | 0  |

Model 2

- (GT) Throat irritation
- (GT) covid
- (GT) covid symptoms
- (GT) Abdominal pain
- (GT) Asthma
- (GT) Dizziness

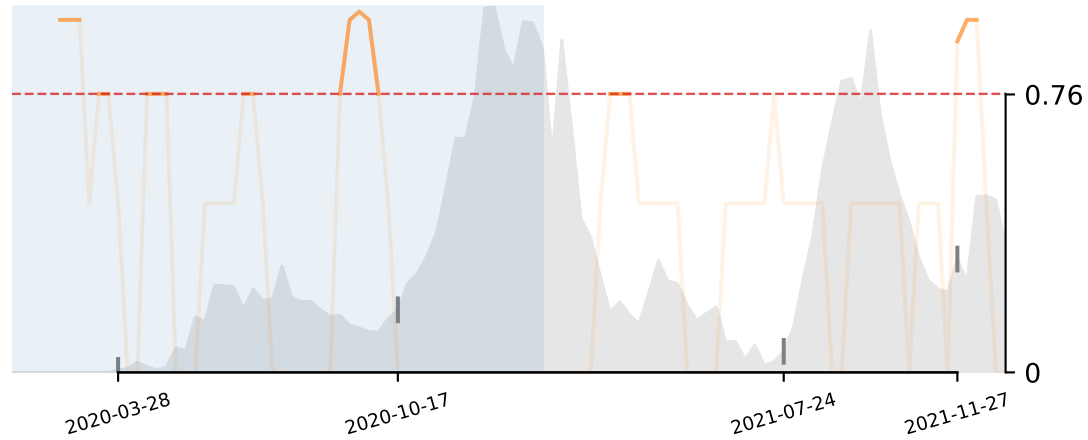

| $\beta$ | tp fp fn |    |   | tp fp fn |    |   |
|---------|----------|----|---|----------|----|---|
|         | 1.00     | 0  | 0 | 2        | 0  | 0 |
| 0.99    | 0        | 0  | 2 | 0        | 0  | 2 |
| 0.96    | 1        | 0  | 1 | 0        | 2  | 1 |
| 0.91    | 2        | 3  | 0 | 1        | 2  | 1 |
| 0.76    | 2        | 3  | 0 | 2        | 5  | 0 |
| 0.46    | 2        | 9  | 0 | 2        | 21 | 0 |
| 0.00    | 2        | 14 | 0 | 2        | 34 | 0 |

Model 3

- (GT) Asthma
- (GT) covid
- (GT) covid symptoms
- (GT) quarantine
- (GT) Abdominal pain
- (GT) Dizziness

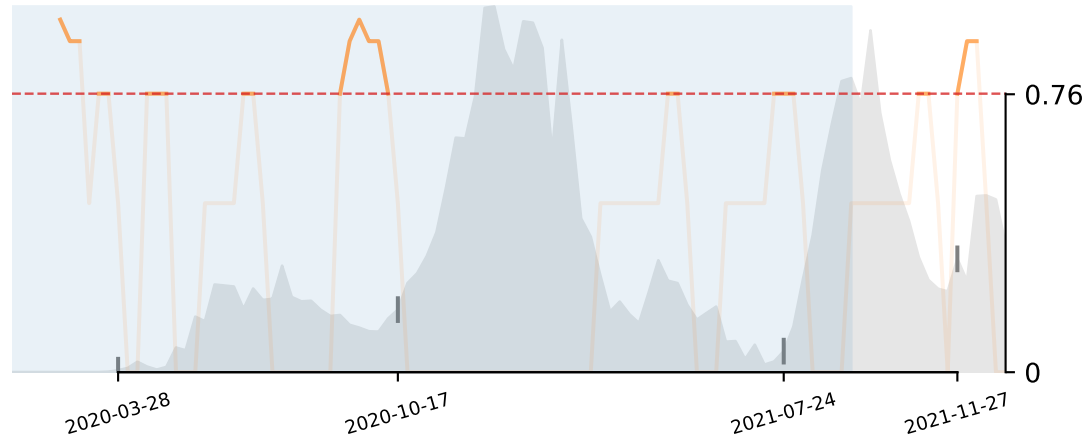

| $\beta$ | tp fp fn |    |   | tp fp fn |   |   |
|---------|----------|----|---|----------|---|---|
|         | 1.00     | 0  | 0 | 3        | 0 | 0 |
| 0.99    | 0        | 0  | 3 | 0        | 0 | 1 |
| 0.96    | 0        | 0  | 3 | 0        | 0 | 1 |
| 0.91    | 1        | 1  | 2 | 0        | 2 | 0 |
| 0.76    | 2        | 3  | 1 | 1        | 2 | 0 |
| 0.46    | 3        | 12 | 0 | 1        | 7 | 0 |
| 0.00    | 3        | 29 | 0 | 1        | 9 | 0 |

## Proxies selected by the Multiple Sources method

Model 1

- (GT) chest tightness
- (GT) covid-19 who
- (GT) covid
- (GT) how long does covid last
- (GT) loss smell
- (GT) covid-19

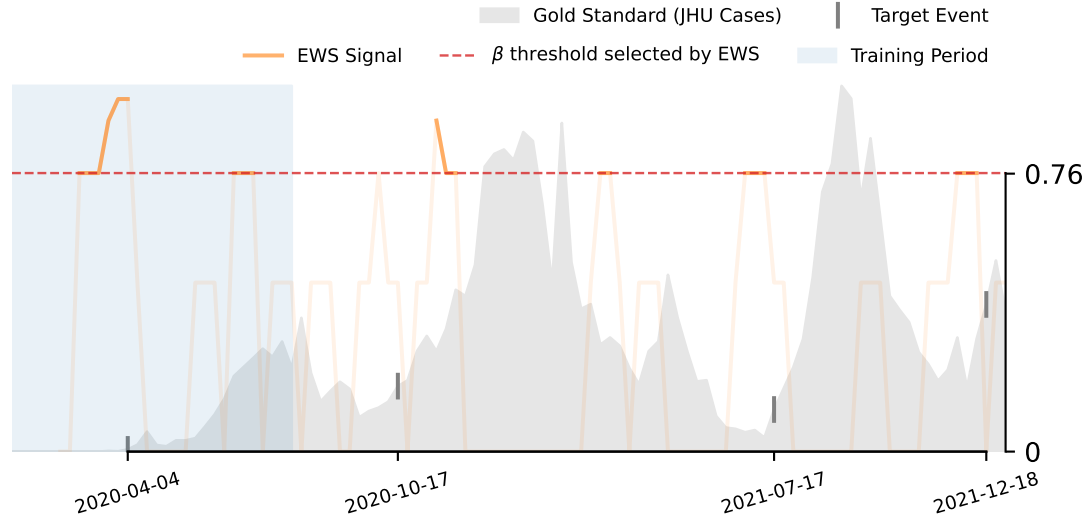

## Performance as a function of $\beta$

| $\beta$ | Training |    |    | Out of sample |    |    |
|---------|----------|----|----|---------------|----|----|
|         | tp       | fp | fn | tp            | fp | fn |
| 1.00    | 0        | 0  | 1  | 0             | 0  | 3  |
| 0.99    | 0        | 0  | 1  | 0             | 0  | 3  |
| 0.96    | 0        | 0  | 1  | 0             | 0  | 3  |
| 0.91    | 1        | 0  | 0  | 0             | 1  | 3  |
| 0.76    | 1        | 0  | 0  | 3             | 5  | 0  |
| 0.46    | 1        | 4  | 0  | 3             | 21 | 0  |
| 0.00    | 1        | 11 | 0  | 3             | 53 | 0  |

Model 2

- (GT) covid-19 who
- (GT) covid-19
- (GT) fever
- (GT) Diarrhea
- (GT) Chest pain

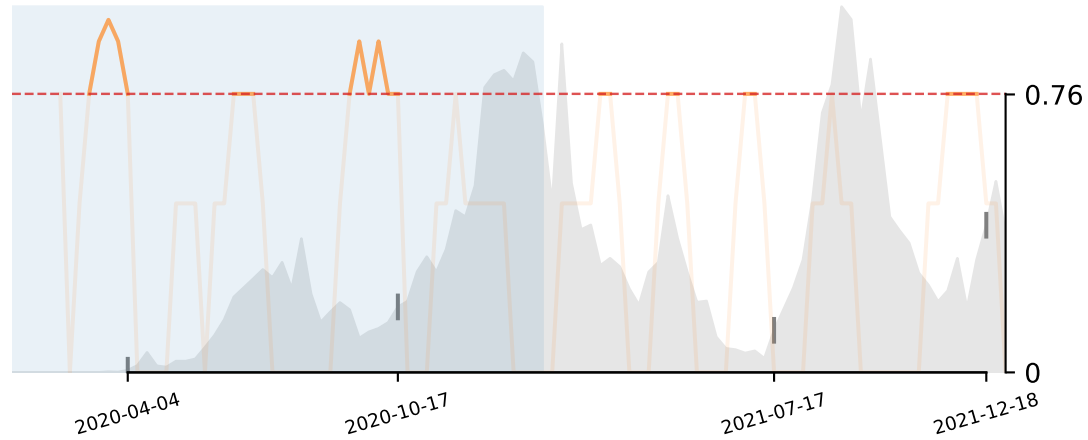

| $\beta$ | tp fp fn |    |   | tp fp fn |    |   |
|---------|----------|----|---|----------|----|---|
|         | 0.99     | 0  | 0 | 2        | 0  | 0 |
| 0.96    | 0        | 0  | 2 | 0        | 0  | 2 |
| 0.91    | 1        | 0  | 1 | 0        | 0  | 2 |
| 0.76    | 2        | 0  | 0 | 2        | 5  | 0 |
| 0.46    | 2        | 6  | 0 | 2        | 17 | 0 |
| 0.00    | 2        | 21 | 0 | 2        | 34 | 0 |

Model 3

- (GT) covid-19
- (GT) fever
- (GT) covid-19 who
- (GT) Shortness of breath
- (GT) covid
- (GT) covid symptoms

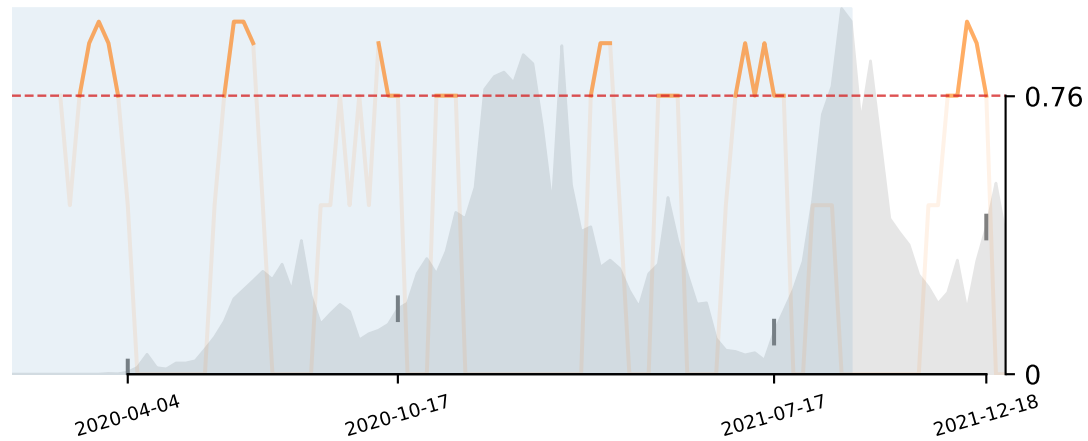

| $\beta$ | tp fp fn |    |   | tp fp fn |   |   |
|---------|----------|----|---|----------|---|---|
|         | 1.00     | 0  | 0 | 3        | 0 | 0 |
| 0.99    | 0        | 0  | 3 | 0        | 0 | 1 |
| 0.96    | 0        | 0  | 3 | 1        | 0 | 0 |
| 0.91    | 1        | 2  | 2 | 1        | 0 | 0 |
| 0.76    | 3        | 5  | 0 | 1        | 0 | 0 |
| 0.46    | 3        | 17 | 0 | 1        | 0 | 0 |
| 0.00    | 3        | 28 | 0 | 1        | 9 | 0 |

## Proxies selected by the Multiple Sources method

Model 1

- (GT) covid
- (GT) covid-19
- (GT) covid symptoms
- (GT) quarantine
- (GT) Burning Chest Pain
- (GT) Chronic pain

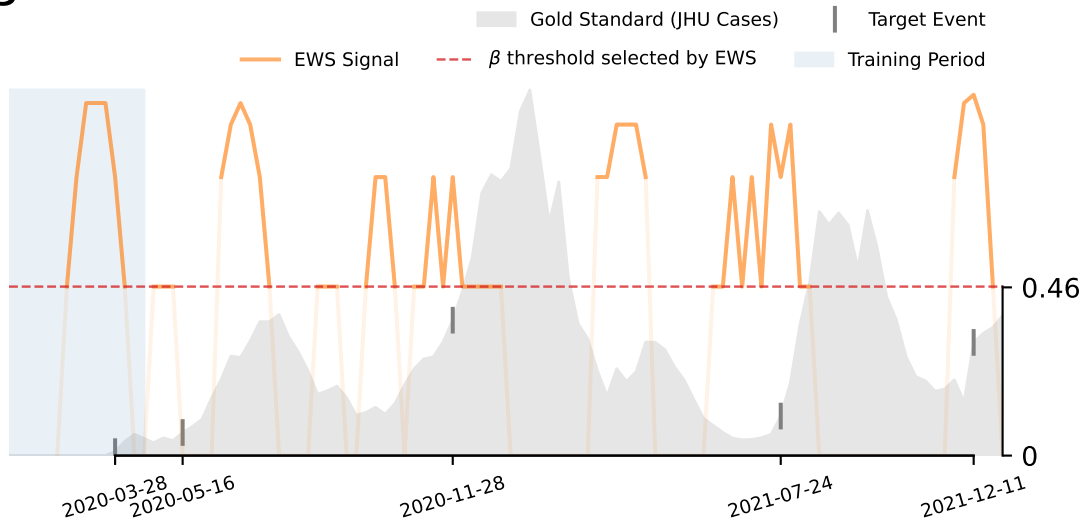

Model 2

- (GT) Chronic pain
- Apple Mobility (driving)
- Apple Mobility (walking)
- Apple Mobility (transit)

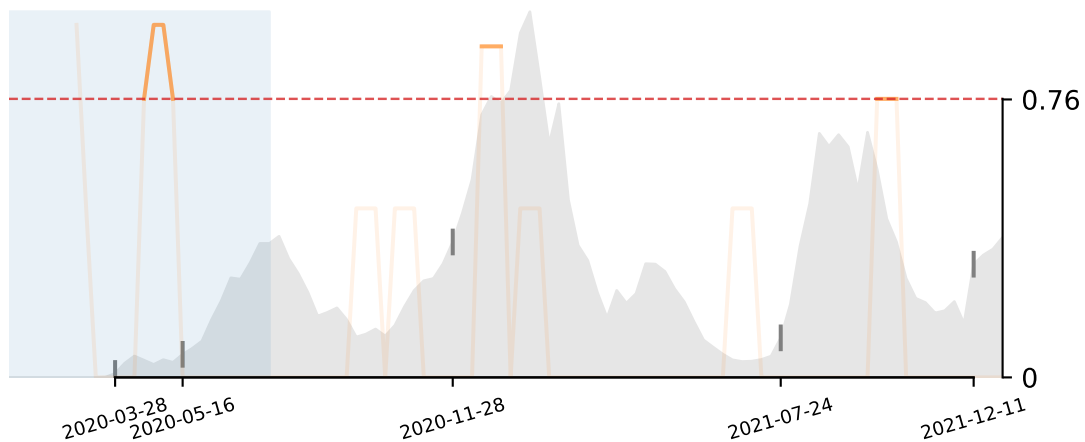

Model 3

- Apple Mobility (walking)
- (GT) covid
- (GT) loss smell
- (GT) quarantine
- (GT) Abdominal pain
- (GT) Chronic pain

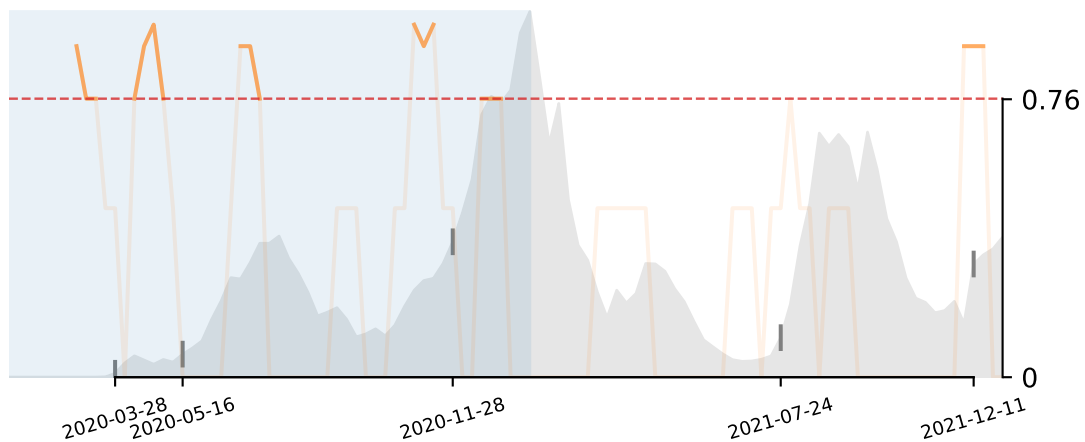

## Performance as a function of $\beta$

| $\beta$ | Training |    |    | Out of sample |    |    |
|---------|----------|----|----|---------------|----|----|
|         | tp       | fp | fn | tp            | fp | fn |
| 1.00    | 0        | 0  | 1  | 0             | 0  | 4  |
| 0.99    | 0        | 0  | 1  | 1             | 0  | 3  |
| 0.96    | 0        | 0  | 1  | 1             | 1  | 3  |
| 0.91    | 1        | 0  | 0  | 2             | 8  | 2  |
| 0.76    | 1        | 0  | 0  | 3             | 15 | 1  |
| 0.46    | 1        | 0  | 0  | 4             | 29 | 0  |
| 0.00    | 1        | 2  | 0  | 4             | 64 | 0  |

| $\beta$ | tp fp fn |   |   | tp fp fn |    |   |
|---------|----------|---|---|----------|----|---|
|         | 0.96     | 0 | 0 | 2        | 0  | 0 |
| 0.91    | 2        | 0 | 0 | 0        | 3  | 3 |
| 0.76    | 2        | 0 | 0 | 0        | 6  | 3 |
| 0.46    | 2        | 0 | 0 | 2        | 12 | 1 |
| 0.00    | 2        | 0 | 0 | 3        | 55 | 0 |

| $\beta$ | tp fp fn |    |   | tp fp fn |    |   |
|---------|----------|----|---|----------|----|---|
|         | 1.00     | 0  | 0 | 3        | 0  | 0 |
| 0.99    | 0        | 0  | 3 | 0        | 0  | 2 |
| 0.96    | 0        | 0  | 3 | 0        | 0  | 2 |
| 0.91    | 2        | 0  | 1 | 1        | 1  | 1 |
| 0.76    | 3        | 2  | 0 | 1        | 2  | 0 |
| 0.46    | 3        | 7  | 0 | 2        | 13 | 0 |
| 0.00    | 3        | 13 | 0 | 2        | 35 | 0 |

## Proxies selected by the Multiple Sources method

Model 1

- (GT) chest tightness
- (GT) covid-19 who
- (GT) Hyperventilation
- (GT) covid
- (GT) how long does covid last
- (GT) covid-19

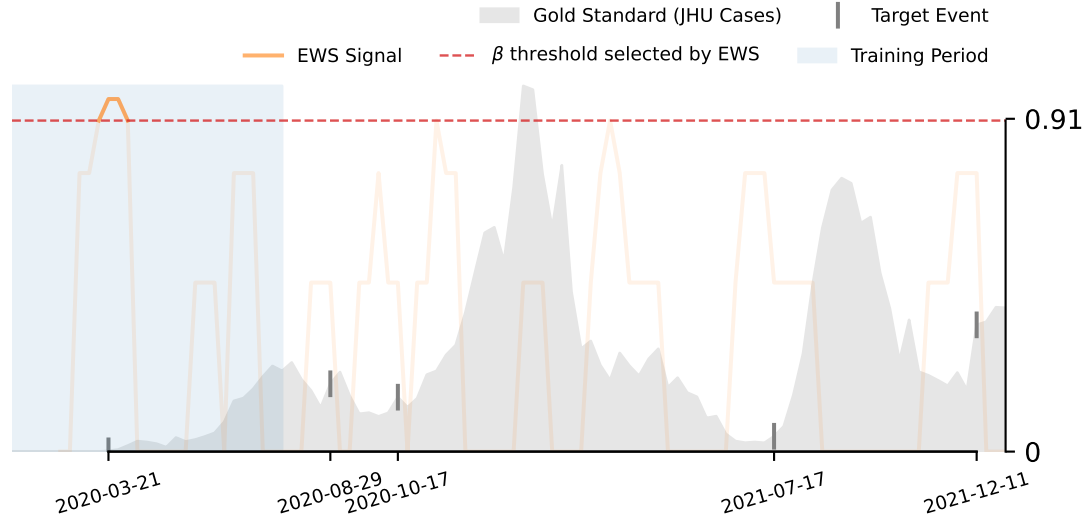

Model 2

- (GT) how long does covid last
- (GT) chest pain
- (GT) covid symptoms
- (GT) Burning Chest Pain
- (GT) Chills

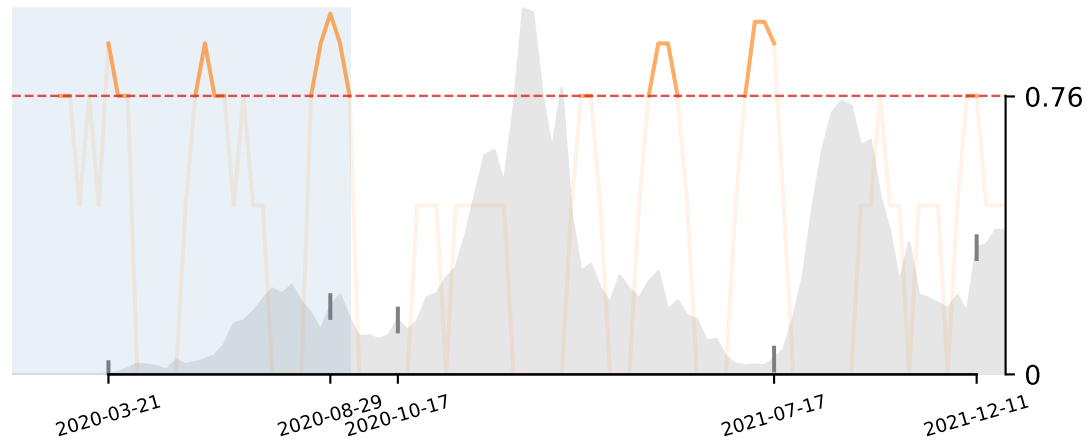

Model 3

- (GT) covid-19 who
- (GT) covid symptoms
- (GT) Acute bronchitis
- (GT) Ageusia
- (GT) Nasal congestion
- (GT) Phlegm

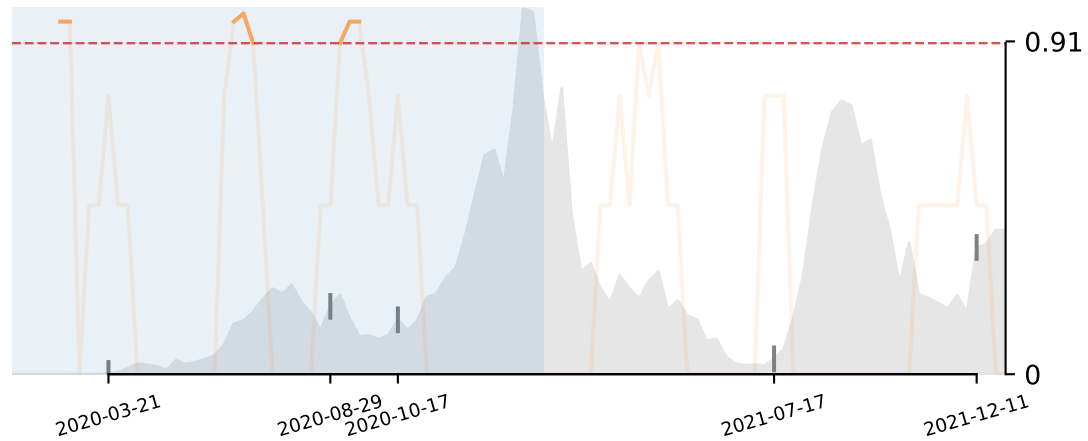

## Performance as a function of $\beta$

| $\beta$ | Training |    |    | Out of sample |    |    |
|---------|----------|----|----|---------------|----|----|
|         | tp       | fp | fn | tp            | fp | fn |
| 1.00    | 0        | 0  | 1  | 0             | 0  | 4  |
| 0.99    | 0        | 0  | 1  | 0             | 0  | 4  |
| 0.96    | 0        | 0  | 1  | 0             | 0  | 4  |
| 0.91    | 1        | 1  | 0  | 0             | 2  | 4  |
| 0.76    | 1        | 2  | 0  | 3             | 6  | 1  |
| 0.46    | 1        | 5  | 0  | 4             | 20 | 0  |
| 0.00    | 1        | 8  | 0  | 4             | 49 | 0  |

| $\beta$ | tp |    |    | fp |    |    | fn |    |    |
|---------|----|----|----|----|----|----|----|----|----|
|         | tp | fp | fn | tp | fp | fn | tp | fp | fn |
| 0.99    | 0  | 0  | 2  | 0  | 0  | 3  | 0  | 0  | 3  |
| 0.96    | 1  | 0  | 1  | 1  | 0  | 2  | 1  | 0  | 2  |
| 0.91    | 1  | 0  | 1  | 1  | 2  | 2  | 1  | 2  | 2  |
| 0.76    | 2  | 2  | 0  | 2  | 7  | 1  | 2  | 7  | 1  |
| 0.46    | 2  | 10 | 0  | 2  | 28 | 0  | 2  | 28 | 0  |
| 0.00    | 2  | 14 | 0  | 3  | 49 | 0  | 3  | 49 | 0  |

| $\beta$ | tp |    |    | fp |    |    | fn |    |    |
|---------|----|----|----|----|----|----|----|----|----|
|         | tp | fp | fn | tp | fp | fn | tp | fp | fn |
| 1.00    | 0  | 0  | 3  | 0  | 0  | 2  | 0  | 0  | 2  |
| 0.99    | 0  | 0  | 3  | 0  | 0  | 2  | 0  | 0  | 2  |
| 0.96    | 0  | 1  | 3  | 0  | 0  | 2  | 0  | 0  | 2  |
| 0.91    | 2  | 4  | 1  | 0  | 2  | 2  | 0  | 2  | 2  |
| 0.76    | 2  | 6  | 1  | 2  | 5  | 0  | 2  | 5  | 0  |
| 0.46    | 2  | 7  | 1  | 2  | 11 | 0  | 2  | 11 | 0  |
| 0.00    | 3  | 12 | 0  | 2  | 34 | 0  | 2  | 34 | 0  |

## Proxies selected by the Multiple Sources method

Model 1

- (GT) covid
- (GT) how long does covid last
- (GT) loss smell
- (GT) covid-19
- (GT) loss taste
- (GT) chest pain

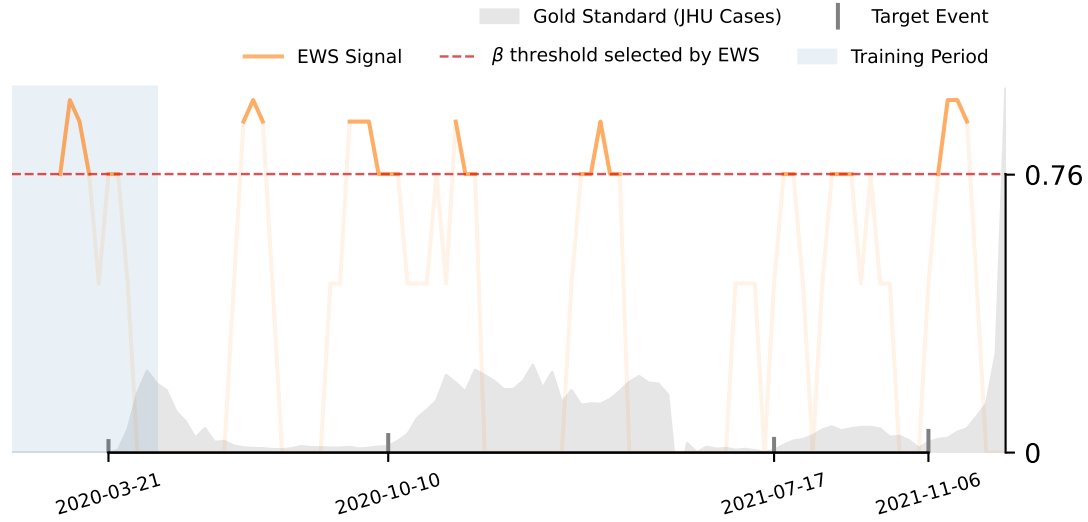

Model 2

- (GT) how long does covid last
- (GT) nose bleed
- (GT) loss smell
- (GT) covid-19
- (GT) covid symptoms
- (GT) sars-cov-2

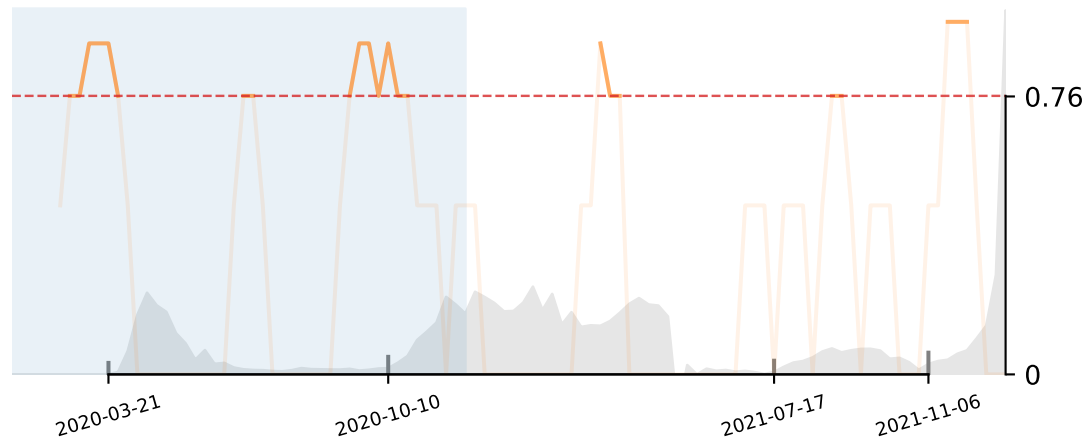

Model 3

- (GT) covid
- (GT) covid symptoms
- (GT) Ageusia
- (GT) chest pain
- (GT) Chest pain
- (GT) Hyperventilation

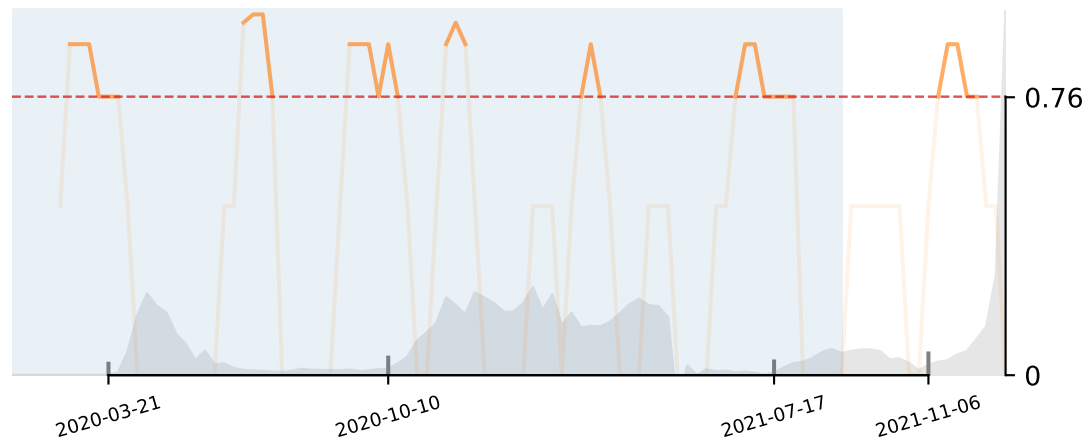

## Performance as a function of $\beta$

| $\beta$ | Training |    |    | Out of sample |    |    |
|---------|----------|----|----|---------------|----|----|
|         | tp       | fp | fn | tp            | fp | fn |
| 1.00    | 0        | 0  | 1  | 0             | 0  | 3  |
| 0.99    | 0        | 0  | 1  | 0             | 0  | 3  |
| 0.96    | 0        | 0  | 1  | 0             | 3  | 2  |
| 0.91    | 1        | 0  | 0  | 1             | 8  | 1  |
| 0.76    | 1        | 0  | 0  | 2             | 22 | 0  |
| 0.46    | 1        | 2  | 0  | 3             | 33 | 0  |
| 0.00    | 1        | 3  | 0  | 3             | 67 | 0  |

| $\beta$ | tp fp fn |    |   | tp fp fn |    |   |
|---------|----------|----|---|----------|----|---|
|         | 1.00     | 0  | 0 | 2        | 0  | 0 |
| 0.99    | 0        | 0  | 2 | 0        | 0  | 2 |
| 0.96    | 0        | 0  | 2 | 0        | 3  | 1 |
| 0.91    | 0        | 0  | 2 | 0        | 4  | 1 |
| 0.76    | 2        | 0  | 0 | 0        | 8  | 1 |
| 0.46    | 2        | 5  | 0 | 2        | 18 | 0 |
| 0.00    | 2        | 15 | 0 | 2        | 42 | 0 |

| $\beta$ | tp fp fn |    |   | tp fp fn |    |   |
|---------|----------|----|---|----------|----|---|
|         | 1.00     | 0  | 0 | 3        | 0  | 0 |
| 0.99    | 0        | 0  | 3 | 0        | 0  | 1 |
| 0.96    | 0        | 2  | 3 | 0        | 0  | 1 |
| 0.91    | 0        | 4  | 3 | 0        | 2  | 0 |
| 0.76    | 3        | 7  | 0 | 0        | 5  | 0 |
| 0.46    | 3        | 14 | 0 | 1        | 9  | 0 |
| 0.00    | 3        | 32 | 0 | 1        | 10 | 0 |

## Proxies selected by the Multiple Sources method

Model 1

- (GT) covid
- (GT) how long does covid last
- (GT) loss smell
- (GT) covid-19
- (GT) loss taste
- (GT) chest pain

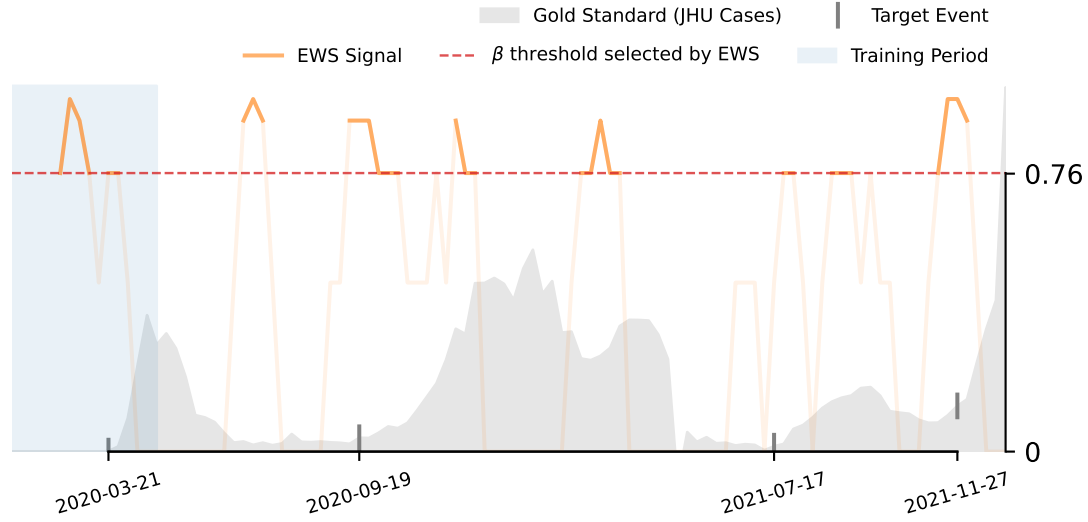

Model 2

- (GT) how long does covid last
- (GT) loss smell
- (GT) sars-cov-2
- (GT) Asthma
- (GT) Cough
- (GT) Wheeze

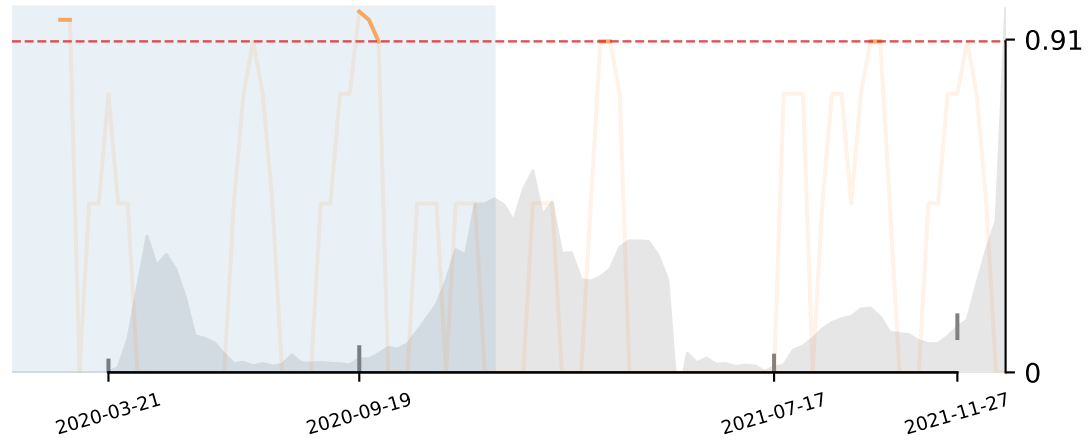

Model 3

- (GT) Chest pain
- (GT) chest pain
- (GT) how long does covid last
- (GT) covid-19 who
- (GT) sars-cov-2
- (GT) Asthma

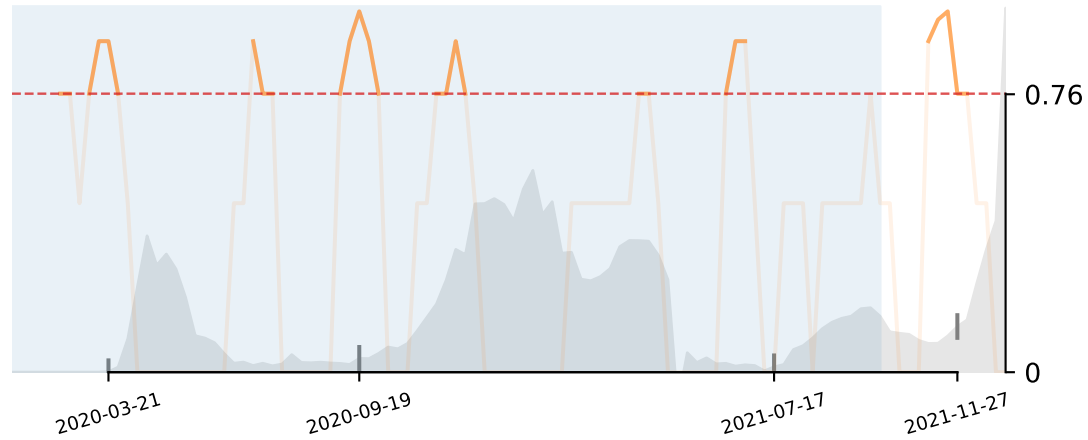

## Performance as a function of $\beta$

| $\beta$ | Training |    |    | Out of sample |    |    |
|---------|----------|----|----|---------------|----|----|
|         | tp       | fp | fn | tp            | fp | fn |
| 1.00    | 0        | 0  | 1  | 0             | 0  | 3  |
| 0.99    | 0        | 0  | 1  | 0             | 0  | 3  |
| 0.96    | 0        | 0  | 1  | 1             | 1  | 2  |
| 0.91    | 1        | 0  | 0  | 2             | 7  | 1  |
| 0.76    | 1        | 0  | 0  | 2             | 23 | 0  |
| 0.46    | 1        | 2  | 0  | 3             | 36 | 0  |
| 0.00    | 1        | 3  | 0  | 3             | 67 | 0  |

| $\beta$ | tp |    |    | fp |    |    | fn |    |    |
|---------|----|----|----|----|----|----|----|----|----|
|         | tp | fp | fn | tp | fp | fn | tp | fp | fn |
| 1.00    | 0  | 0  | 2  | 0  | 0  | 2  | 0  | 0  | 2  |
| 0.99    | 0  | 0  | 2  | 0  | 0  | 2  | 0  | 0  | 2  |
| 0.96    | 1  | 0  | 1  | 0  | 0  | 2  | 0  | 0  | 2  |
| 0.91    | 2  | 2  | 0  | 0  | 5  | 1  | 0  | 5  | 1  |
| 0.76    | 2  | 4  | 0  | 1  | 13 | 0  | 1  | 13 | 0  |
| 0.46    | 2  | 6  | 0  | 1  | 21 | 0  | 1  | 21 | 0  |
| 0.00    | 2  | 16 | 0  | 2  | 39 | 0  | 2  | 39 | 0  |

| $\beta$ | tp |    |    | fp |    |    | fn |    |    |
|---------|----|----|----|----|----|----|----|----|----|
|         | tp | fp | fn | tp | fp | fn | tp | fp | fn |
| 1.00    | 0  | 0  | 3  | 0  | 0  | 1  | 0  | 0  | 1  |
| 0.99    | 0  | 0  | 3  | 1  | 0  | 0  | 1  | 0  | 0  |
| 0.96    | 1  | 0  | 2  | 1  | 0  | 0  | 1  | 0  | 0  |
| 0.91    | 1  | 0  | 2  | 1  | 0  | 0  | 1  | 0  | 0  |
| 0.76    | 3  | 3  | 0  | 1  | 1  | 0  | 1  | 1  | 0  |
| 0.46    | 3  | 15 | 0  | 1  | 4  | 0  | 1  | 4  | 0  |
| 0.00    | 3  | 38 | 0  | 1  | 6  | 0  | 1  | 6  | 0  |



## Proxies selected by the Multiple Sources method

Model 1

- (GT) covid
- (GT) covid-19
- (GT) covid symptoms
- (GT) quarantine
- (GT) Acute bronchitis
- (GT) Bronchitis

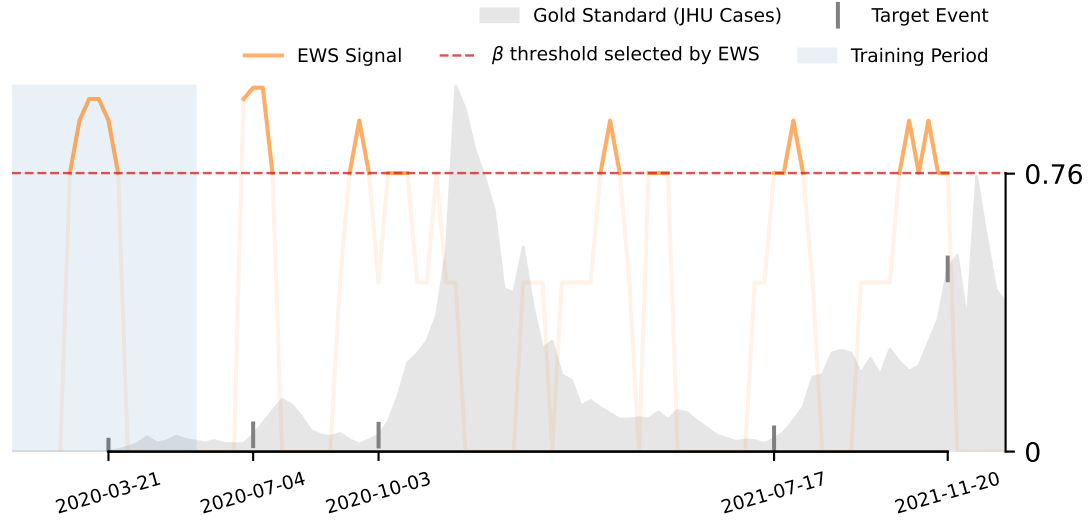

Model 2

- (GT) covid
- (GT) covid-19
- (GT) covid symptoms
- (GT) quarantine
- (GT) Acute bronchitis
- (GT) Bronchitis

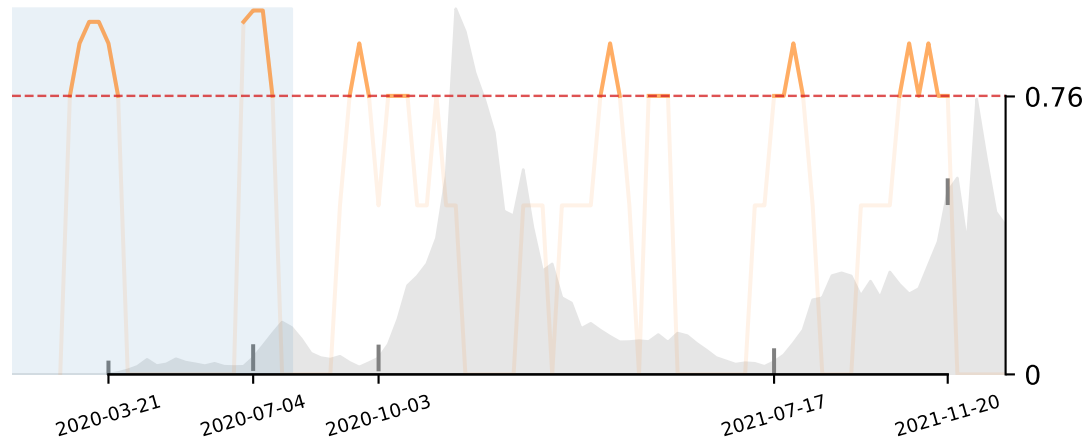

Model 3

- (GT) Acute bronchitis
- (GT) Bronchitis
- (GT) Chills
- (GT) Cough
- (GT) Phlegm
- (GT) Pneumonia

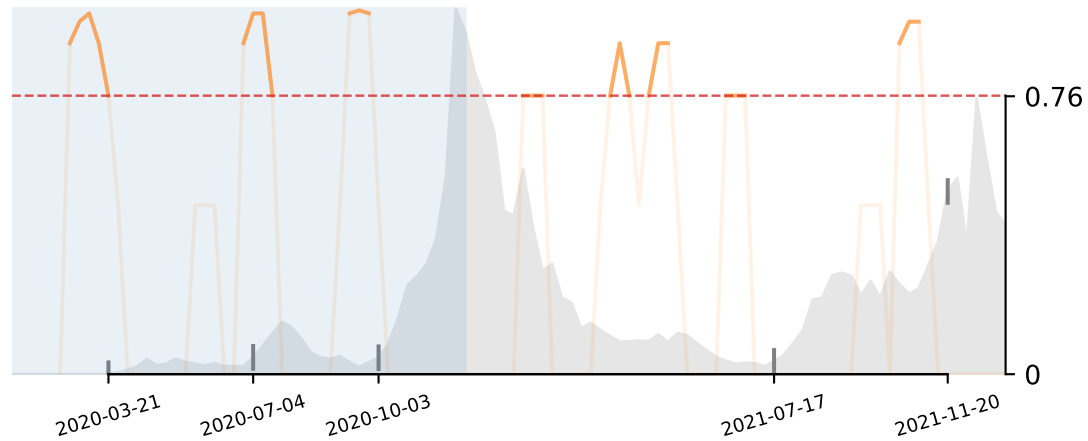

## Performance as a function of $\beta$

| $\beta$ | Training |    |    | Out of sample |    |    |
|---------|----------|----|----|---------------|----|----|
|         | tp       | fp | fn | tp            | fp | fn |
| 1.00    | 0        | 0  | 1  | 1             | 1  | 3  |
| 0.99    | 0        | 0  | 1  | 1             | 1  | 3  |
| 0.96    | 0        | 0  | 1  | 1             | 1  | 3  |
| 0.91    | 1        | 0  | 0  | 3             | 3  | 0  |
| 0.76    | 1        | 0  | 0  | 4             | 15 | 0  |
| 0.46    | 1        | 1  | 0  | 4             | 31 | 0  |
| 0.00    | 1        | 1  | 0  | 4             | 57 | 0  |

| $\beta$ | tp fp fn |   |   | tp fp fn |    |   |
|---------|----------|---|---|----------|----|---|
|         | 1.00     | 0 | 0 | 2        | 0  | 0 |
| 0.99    | 1        | 1 | 1 | 0        | 0  | 3 |
| 0.96    | 1        | 1 | 1 | 0        | 0  | 3 |
| 0.91    | 2        | 1 | 0 | 2        | 2  | 0 |
| 0.76    | 2        | 1 | 0 | 3        | 13 | 0 |
| 0.46    | 2        | 3 | 0 | 3        | 29 | 0 |
| 0.00    | 2        | 3 | 0 | 3        | 53 | 0 |

| $\beta$ | tp fp fn |   |   | tp fp fn |    |   |
|---------|----------|---|---|----------|----|---|
|         | 1.00     | 0 | 0 | 3        | 0  | 0 |
| 0.99    | 1        | 0 | 2 | 0        | 0  | 2 |
| 0.96    | 3        | 1 | 0 | 1        | 0  | 1 |
| 0.91    | 3        | 1 | 0 | 1        | 3  | 1 |
| 0.76    | 3        | 1 | 0 | 2        | 9  | 0 |
| 0.46    | 3        | 2 | 0 | 2        | 15 | 0 |
| 0.00    | 3        | 5 | 0 | 2        | 42 | 0 |

## Proxies selected by the Multiple Sources method

Model 1

- (GT) covid
- (GT) covid-19
- (GT) chest pain
- (GT) covid symptoms
- (GT) quarantine
- (GT) fever

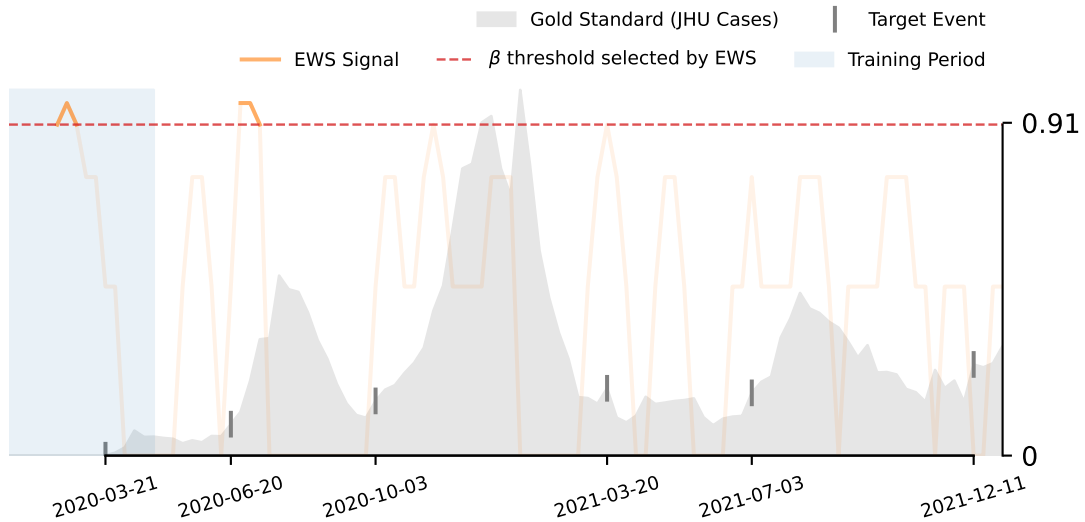

Model 2

- (GT) covid-19
- (GT) covid symptoms
- (GT) fever
- (GT) Ageusia
- (GT) Anosmia
- (GT) Burning Chest Pain

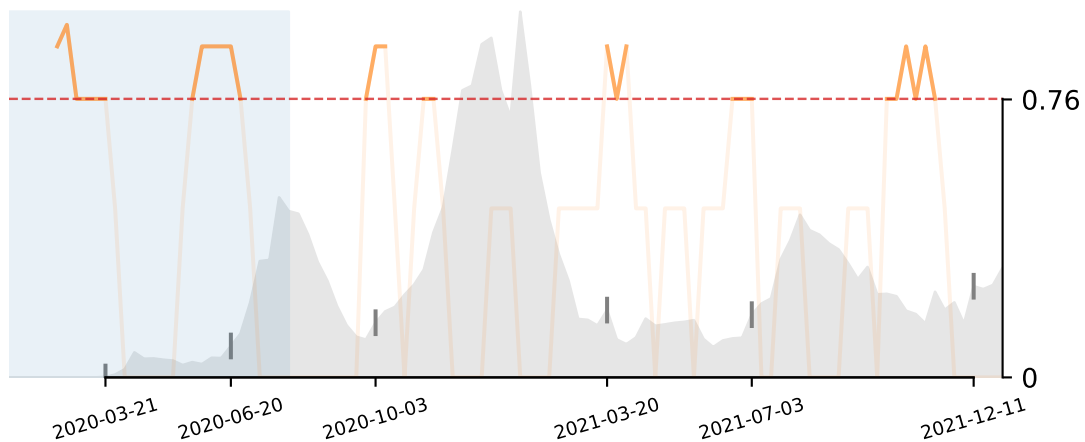

Model 3

- (GT) Ageusia
- (GT) Anosmia
- (GT) Burning Chest Pain
- (GT) Chills
- (GT) Fever
- (GT) Phlegm

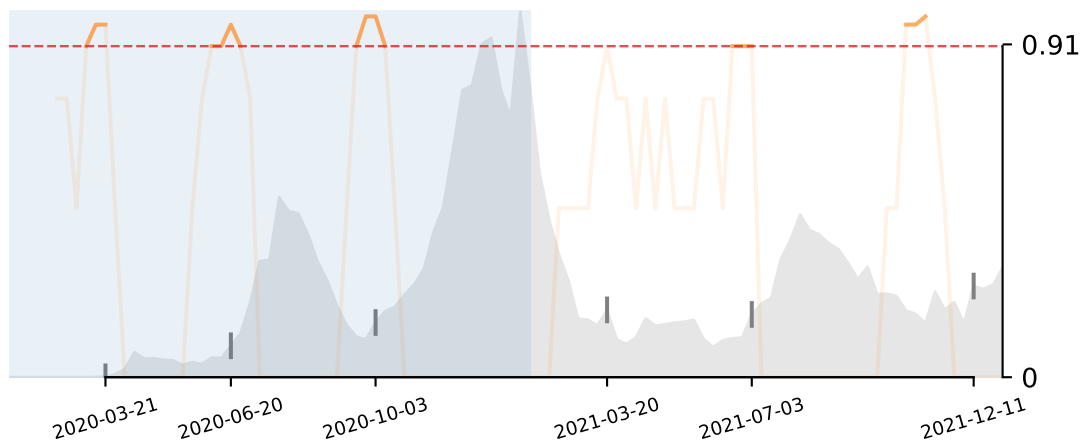

## Performance as a function of $\beta$

| $\beta$ | Training |    |    | Out of sample |    |    |
|---------|----------|----|----|---------------|----|----|
|         | tp       | fp | fn | tp            | fp | fn |
| 1.00    | 0        | 0  | 1  | 0             | 0  | 5  |
| 0.99    | 0        | 0  | 1  | 0             | 0  | 5  |
| 0.96    | 0        | 0  | 1  | 0             | 2  | 4  |
| 0.91    | 1        | 0  | 0  | 1             | 4  | 3  |
| 0.76    | 1        | 1  | 0  | 3             | 20 | 1  |
| 0.46    | 1        | 1  | 0  | 5             | 40 | 0  |
| 0.00    | 1        | 2  | 0  | 5             | 53 | 0  |

| $\beta$ | tp fp fn |   |   | tp fp fn |    |   |
|---------|----------|---|---|----------|----|---|
|         | 1.00     | 0 | 0 | 2        | 0  | 0 |
| 0.99    | 0        | 0 | 2 | 0        | 0  | 4 |
| 0.96    | 0        | 0 | 2 | 0        | 0  | 4 |
| 0.91    | 1        | 0 | 1 | 3        | 3  | 1 |
| 0.76    | 2        | 1 | 0 | 4        | 8  | 0 |
| 0.46    | 2        | 2 | 0 | 4        | 25 | 0 |
| 0.00    | 2        | 5 | 0 | 4        | 46 | 0 |

| $\beta$ | tp fp fn |   |   | tp fp fn |    |   |
|---------|----------|---|---|----------|----|---|
|         | 1.00     | 0 | 0 | 3        | 0  | 0 |
| 0.99    | 0        | 0 | 3 | 1        | 0  | 2 |
| 0.96    | 1        | 0 | 2 | 1        | 1  | 2 |
| 0.91    | 3        | 0 | 0 | 3        | 1  | 0 |
| 0.76    | 3        | 2 | 0 | 3        | 5  | 0 |
| 0.46    | 3        | 4 | 0 | 3        | 11 | 0 |
| 0.00    | 3        | 6 | 0 | 3        | 28 | 0 |

## Proxies selected by the Multiple Sources method

Model 1

- (GT) covid
- (GT) covid-19
- (GT) chest pain
- (GT) covid symptoms
- (GT) Acute bronchitis
- (GT) Bronchitis

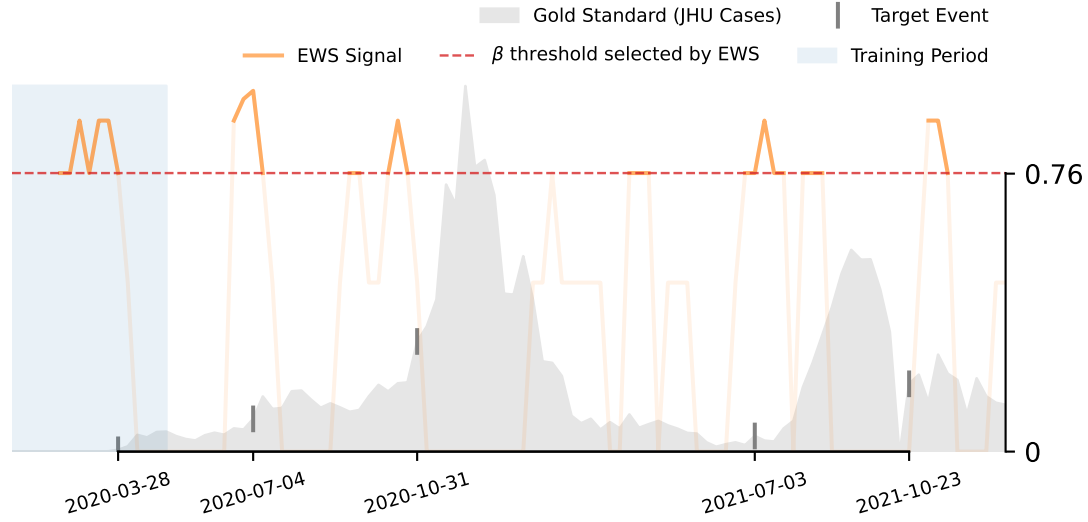

Model 2

- (GT) covid
- (GT) chest pain
- (GT) covid symptoms
- (GT) Acute bronchitis
- (GT) Bronchitis
- (GT) Chills

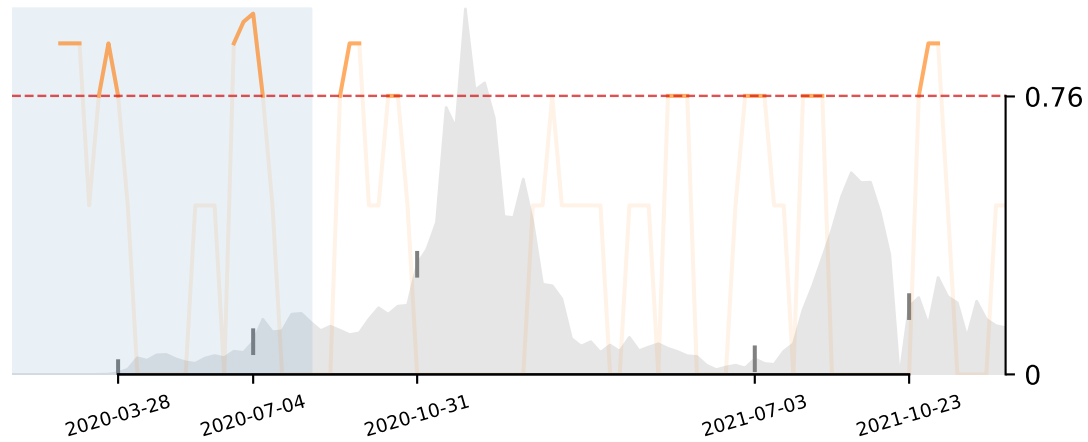

Model 3

- (GT) covid
- (GT) chest pain
- (GT) covid-19
- (GT) Bronchitis
- (GT) Sore throat
- (GT) covid symptoms

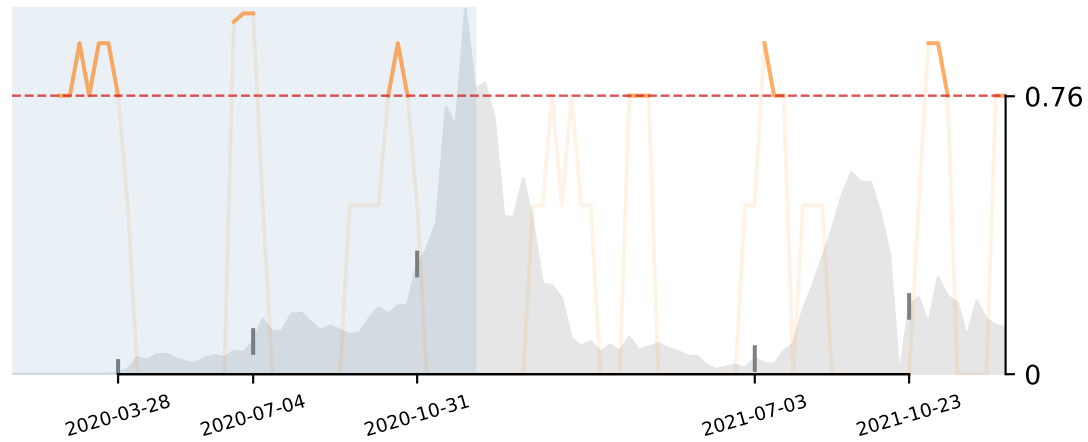

## Performance as a function of $\beta$

| $\beta$ | Training |    |    | Out of sample |    |    |
|---------|----------|----|----|---------------|----|----|
|         | tp       | fp | fn | tp            | fp | fn |
| 1.00    | 0        | 0  | 1  | 0             | 0  | 4  |
| 0.99    | 0        | 0  | 1  | 1             | 0  | 3  |
| 0.96    | 0        | 0  | 1  | 1             | 0  | 3  |
| 0.91    | 0        | 0  | 1  | 2             | 3  | 0  |
| 0.76    | 1        | 0  | 0  | 3             | 15 | 0  |
| 0.46    | 1        | 2  | 0  | 3             | 30 | 0  |
| 0.00    | 1        | 3  | 0  | 4             | 59 | 0  |

| $\beta$ | tp fp fn |   |   | tp fp fn |    |   |
|---------|----------|---|---|----------|----|---|
|         | 1.00     | 0 | 0 | 2        | 0  | 0 |
| 0.99    | 0        | 0 | 2 | 0        | 0  | 3 |
| 0.96    | 1        | 0 | 1 | 0        | 0  | 3 |
| 0.91    | 1        | 0 | 1 | 1        | 3  | 1 |
| 0.76    | 2        | 2 | 0 | 2        | 13 | 0 |
| 0.46    | 2        | 3 | 0 | 2        | 28 | 0 |
| 0.00    | 2        | 7 | 0 | 3        | 51 | 0 |

| $\beta$ | tp fp fn |   |   | tp fp fn |    |   |
|---------|----------|---|---|----------|----|---|
|         | 1.00     | 0 | 0 | 3        | 0  | 0 |
| 0.99    | 0        | 0 | 3 | 0        | 0  | 2 |
| 0.96    | 1        | 0 | 2 | 0        | 0  | 2 |
| 0.91    | 1        | 0 | 2 | 0        | 3  | 0 |
| 0.76    | 3        | 0 | 0 | 0        | 13 | 0 |
| 0.46    | 3        | 2 | 0 | 1        | 22 | 0 |
| 0.00    | 3        | 7 | 0 | 2        | 41 | 0 |

## Proxies selected by the Multiple Sources method

Model 1

- (GT) covid
- (GT) how long does covid last
- (GT) loss smell
- (GT) covid-19
- (GT) loss taste
- (GT) chest pain

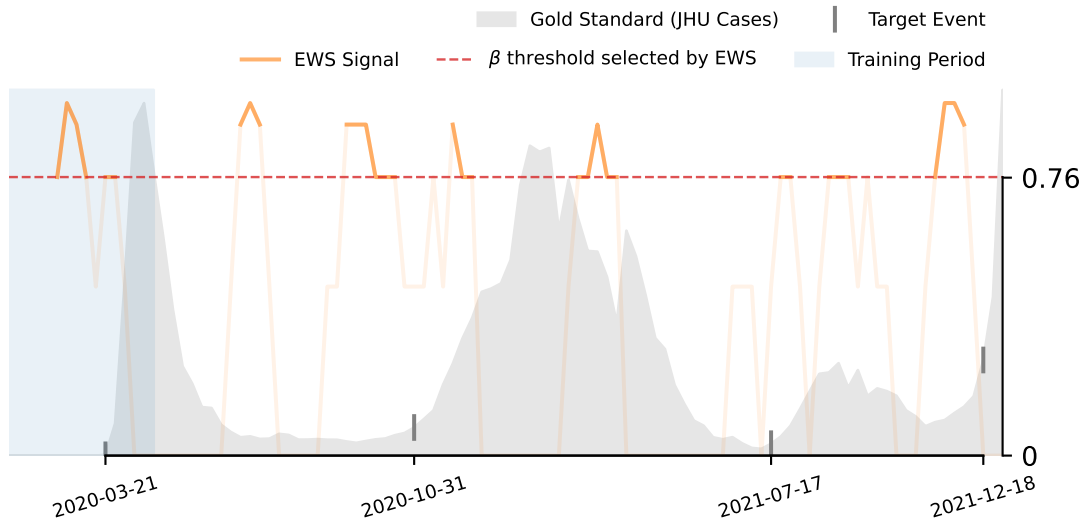

Model 2

- (GT) how long does covid last
- (GT) nose bleed
- (GT) covid-19
- (GT) covid symptoms
- (GT) sars-cov-2
- (GT) Throat irritation

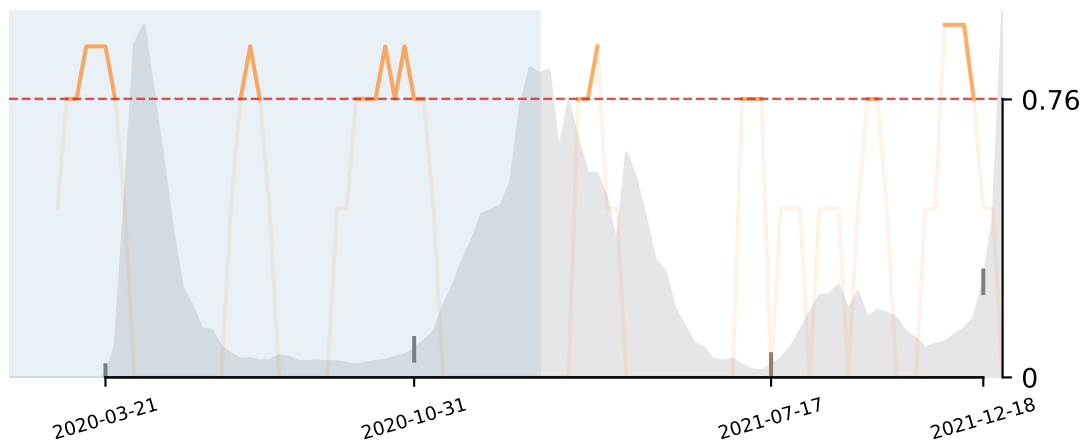

Model 3

- (GT) covid
- (GT) covid symptoms
- (GT) Throat irritation
- (GT) Asphyxia
- (GT) nose bleed
- (GT) how long does covid last

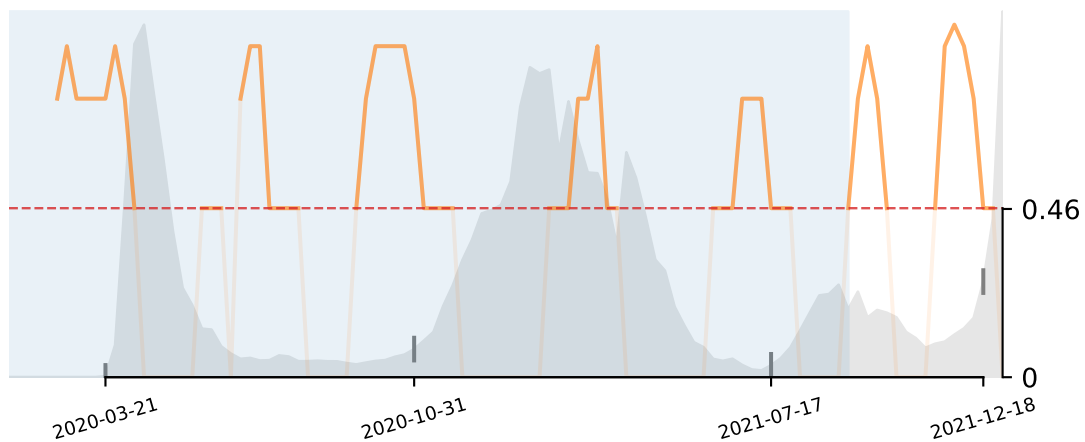

## Performance as a function of $\beta$

| $\beta$ | Training |    |    | Out of sample |    |    |
|---------|----------|----|----|---------------|----|----|
|         | tp       | fp | fn | tp            | fp | fn |
| 1.00    | 0        | 0  | 1  | 0             | 0  | 3  |
| 0.99    | 0        | 0  | 1  | 0             | 0  | 3  |
| 0.96    | 0        | 0  | 1  | 1             | 1  | 2  |
| 0.91    | 1        | 0  | 0  | 2             | 6  | 1  |
| 0.76    | 1        | 0  | 0  | 2             | 19 | 0  |
| 0.46    | 1        | 2  | 0  | 3             | 31 | 0  |
| 0.00    | 1        | 3  | 0  | 3             | 67 | 0  |

| $\beta$ | tp fp fn |    |   | tp fp fn |    |   |
|---------|----------|----|---|----------|----|---|
|         | 1.00     | 0  | 0 | 2        | 0  | 0 |
| 0.99    | 0        | 0  | 2 | 0        | 0  | 2 |
| 0.96    | 0        | 0  | 2 | 1        | 0  | 1 |
| 0.91    | 0        | 0  | 2 | 1        | 1  | 1 |
| 0.76    | 2        | 1  | 0 | 2        | 5  | 0 |
| 0.46    | 2        | 7  | 0 | 2        | 16 | 0 |
| 0.00    | 2        | 14 | 0 | 2        | 34 | 0 |

| $\beta$ | tp fp fn |    |   | tp fp fn |   |   |
|---------|----------|----|---|----------|---|---|
|         | 1.00     | 0  | 0 | 3        | 0 | 0 |
| 0.99    | 0        | 0  | 3 | 0        | 0 | 1 |
| 0.96    | 0        | 0  | 3 | 1        | 0 | 0 |
| 0.91    | 0        | 0  | 3 | 1        | 1 | 0 |
| 0.76    | 2        | 4  | 1 | 1        | 3 | 0 |
| 0.46    | 3        | 10 | 0 | 1        | 5 | 0 |
| 0.00    | 3        | 33 | 0 | 1        | 9 | 0 |

## Proxies selected by the Multiple Sources method

Model 1

- (GT) covid
- (GT) how long does covid last
- (GT) loss smell
- (GT) covid-19
- (GT) loss taste
- (GT) chest pain

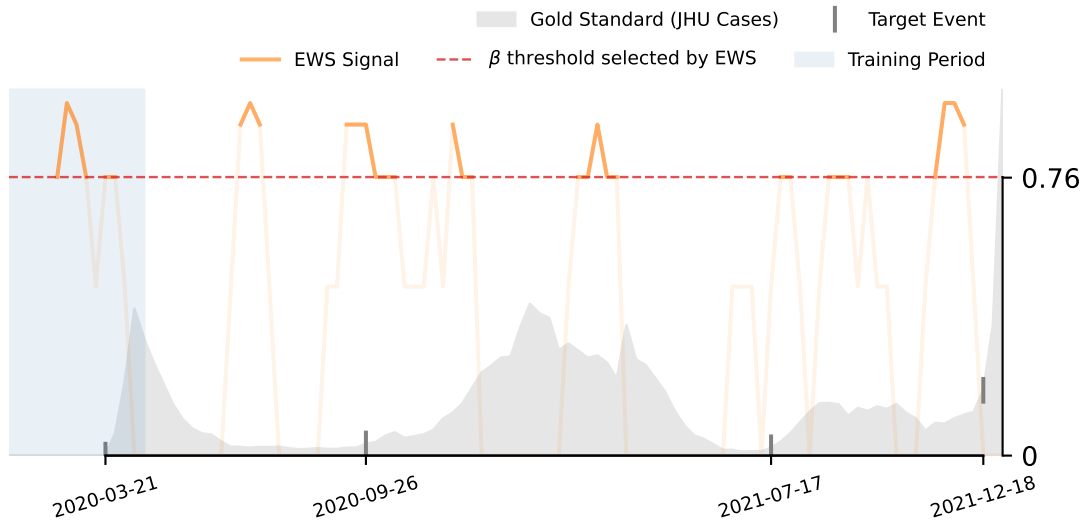

Model 2

- (GT) how long does covid last
- (GT) loss smell
- (GT) covid symptoms
- (GT) sars-cov-2
- (GT) Asthma
- (GT) Sore throat

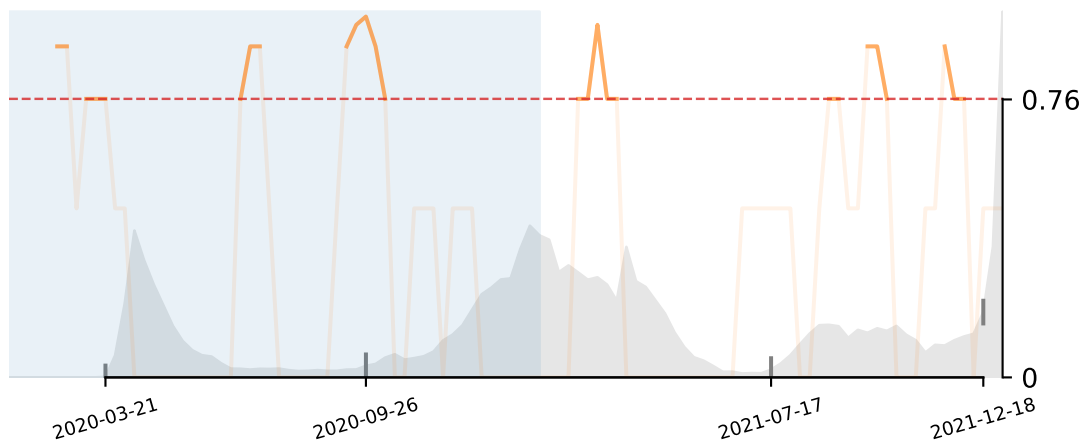

Model 3

- (GT) Asthma
- (GT) covid symptoms
- (GT) Chronic pain
- (GT) Shortness of breath
- (GT) chest pain
- (GT) Ageusia

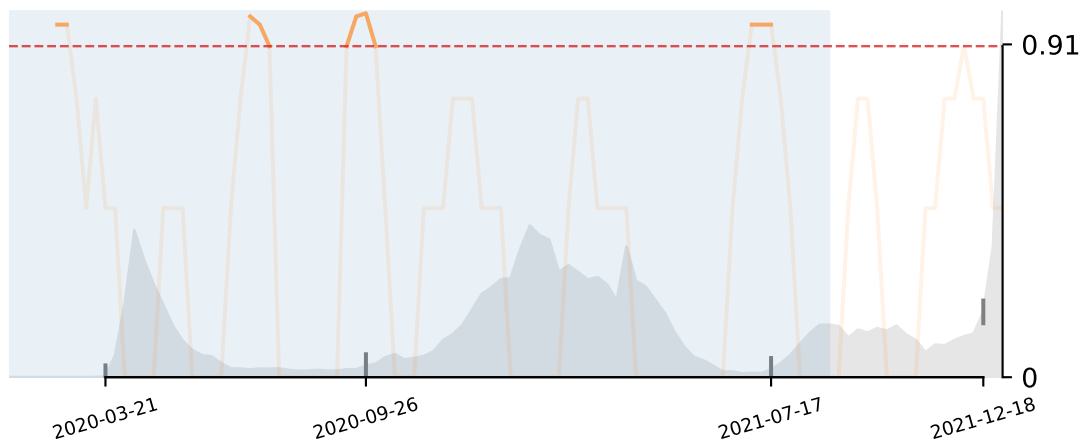

## Performance as a function of $\beta$

| $\beta$ | Training |    |    | Out of sample |    |    |
|---------|----------|----|----|---------------|----|----|
|         | tp       | fp | fn | tp            | fp | fn |
| 1.00    | 0        | 0  | 1  | 0             | 0  | 3  |
| 0.99    | 0        | 0  | 1  | 0             | 0  | 3  |
| 0.96    | 0        | 0  | 1  | 1             | 1  | 2  |
| 0.91    | 1        | 0  | 0  | 2             | 5  | 1  |
| 0.76    | 1        | 0  | 0  | 2             | 21 | 0  |
| 0.46    | 1        | 2  | 0  | 3             | 33 | 0  |
| 0.00    | 1        | 3  | 0  | 3             | 68 | 0  |

| $\beta$ | tp fp fn |    |   | tp fp fn |    |   |
|---------|----------|----|---|----------|----|---|
|         | 1.00     | 0  | 0 | 2        | 0  | 0 |
| 0.99    | 0        | 0  | 2 | 0        | 0  | 2 |
| 0.96    | 1        | 0  | 1 | 0        | 1  | 2 |
| 0.91    | 1        | 0  | 1 | 1        | 3  | 1 |
| 0.76    | 2        | 4  | 0 | 1        | 10 | 1 |
| 0.46    | 2        | 6  | 0 | 2        | 17 | 0 |
| 0.00    | 2        | 15 | 0 | 2        | 34 | 0 |

| $\beta$ | tp fp fn |    |   | tp fp fn |    |   |
|---------|----------|----|---|----------|----|---|
|         | 1.00     | 0  | 0 | 3        | 0  | 0 |
| 0.99    | 1        | 0  | 2 | 0        | 0  | 1 |
| 0.96    | 1        | 1  | 2 | 0        | 0  | 1 |
| 0.91    | 3        | 3  | 0 | 1        | 0  | 0 |
| 0.76    | 3        | 5  | 0 | 1        | 2  | 0 |
| 0.46    | 3        | 12 | 0 | 1        | 6  | 0 |
| 0.00    | 3        | 30 | 0 | 1        | 11 | 0 |

## Proxies selected by the Multiple Sources method

Model 1

- (GT) covid
- (GT) covid-19
- (GT) chest pain
- (GT) covid symptoms
- (GT) quarantine
- (GT) fever

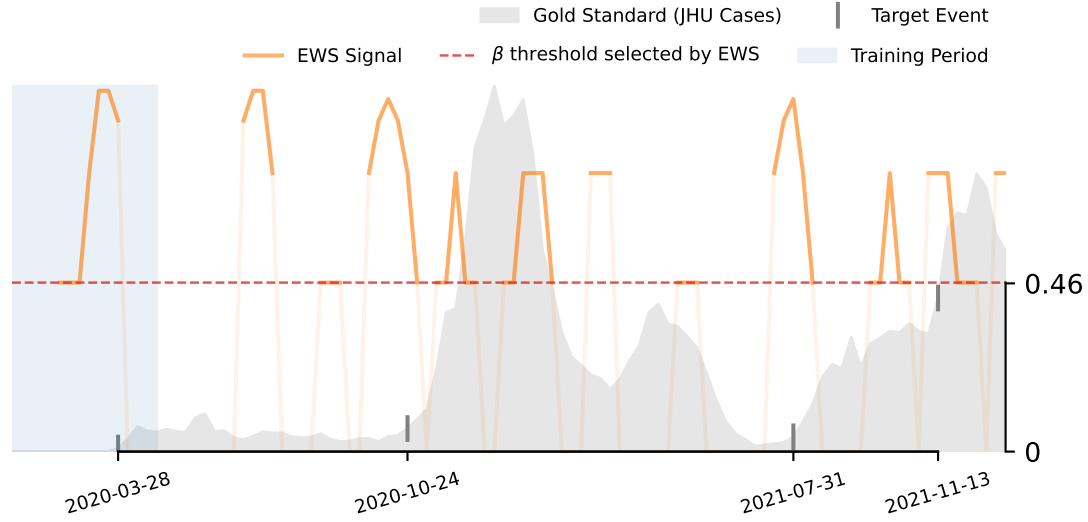

## Performance as a function of $\beta$

| $\beta$ | Training |    |    | Out of sample |    |    |
|---------|----------|----|----|---------------|----|----|
|         | tp       | fp | fn | tp            | fp | fn |
| 1.00    | 0        | 0  | 1  | 0             | 0  | 3  |
| 0.99    | 0        | 0  | 1  | 0             | 2  | 3  |
| 0.96    | 1        | 0  | 0  | 2             | 2  | 1  |
| 0.91    | 1        | 0  | 0  | 2             | 3  | 1  |
| 0.76    | 1        | 0  | 0  | 3             | 15 | 0  |
| 0.46    | 1        | 0  | 0  | 3             | 34 | 0  |
| 0.00    | 1        | 2  | 0  | 3             | 67 | 0  |

Model 2

- (GT) covid
- (GT) covid-19
- (GT) covid symptoms
- (GT) Ageusia
- (GT) Diarrhea
- (GT) quarantine

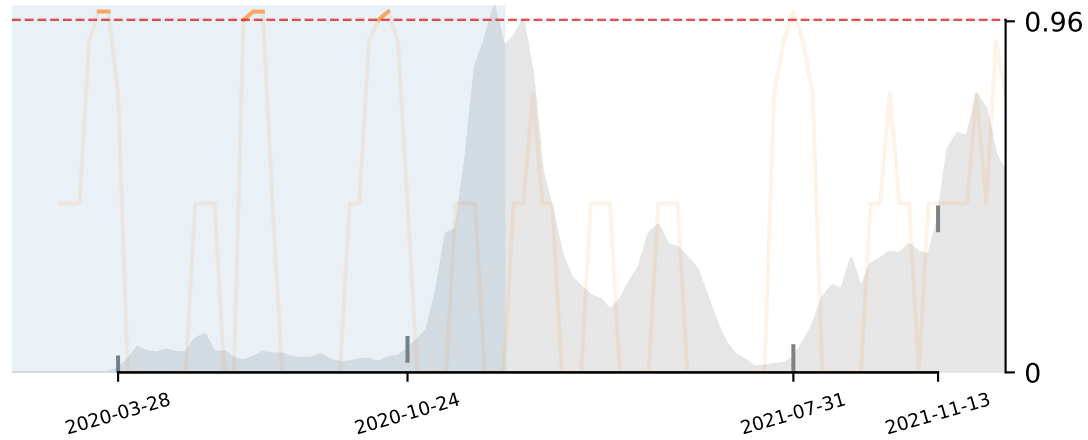

| $\beta$ | tp fp fn |    |   | tp fp fn |    |   |
|---------|----------|----|---|----------|----|---|
|         | 1.00     | 0  | 0 | 2        | 0  | 0 |
| 0.99    | 0        | 0  | 2 | 1        | 0  | 1 |
| 0.96    | 2        | 2  | 0 | 1        | 0  | 1 |
| 0.91    | 2        | 3  | 0 | 1        | 2  | 1 |
| 0.76    | 2        | 3  | 0 | 2        | 6  | 0 |
| 0.46    | 2        | 3  | 0 | 2        | 21 | 0 |
| 0.00    | 2        | 14 | 0 | 2        | 38 | 0 |

Model 3

- (GT) covid
- (GT) covid-19
- (GT) covid symptoms
- (GT) quarantine
- (GT) Ageusia
- (GT) Hyperventilation

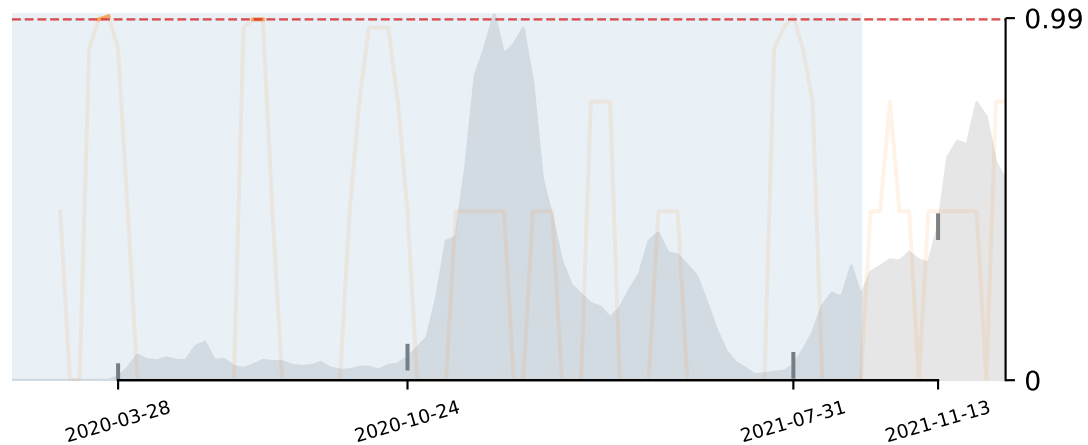

| $\beta$ | tp fp fn |    |   | tp fp fn |   |   |
|---------|----------|----|---|----------|---|---|
|         | 1.00     | 0  | 0 | 3        | 0 | 0 |
| 0.99    | 2        | 0  | 1 | 0        | 0 | 1 |
| 0.96    | 2        | 2  | 1 | 0        | 0 | 1 |
| 0.91    | 3        | 3  | 0 | 0        | 0 | 1 |
| 0.76    | 3        | 4  | 0 | 1        | 2 | 0 |
| 0.46    | 3        | 9  | 0 | 1        | 7 | 0 |
| 0.00    | 3        | 25 | 0 | 1        | 8 | 0 |

## Proxies selected by the Multiple Sources method

Model 1

- (GT) covid
- (GT) how long does covid last
- (GT) loss smell
- (GT) covid-19
- (GT) loss taste
- (GT) chest pain

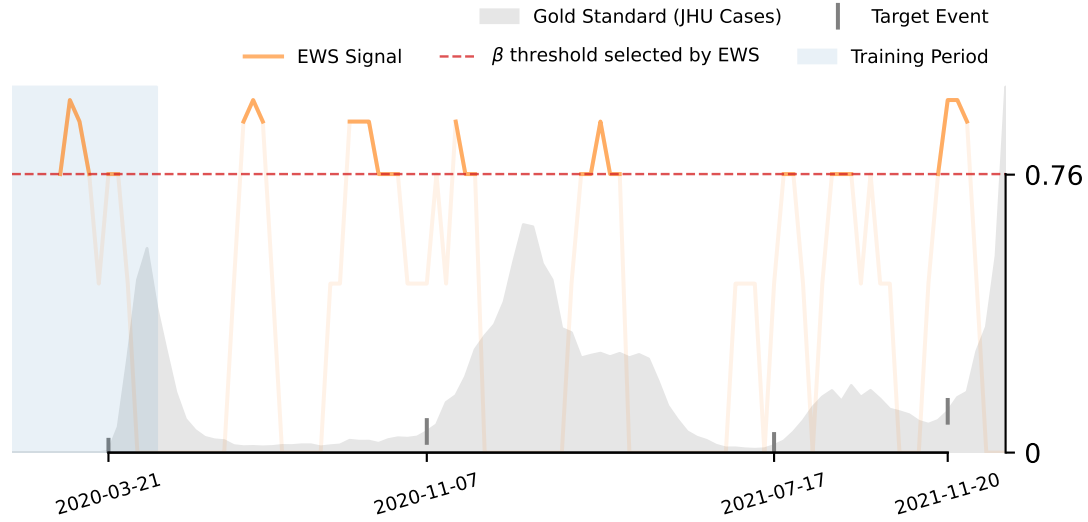

Model 2

- (GT) nose bleed
- (GT) covid-19
- (GT) covid symptoms
- (GT) sars-cov-2
- (GT) Abdominal pain
- (GT) Otitis

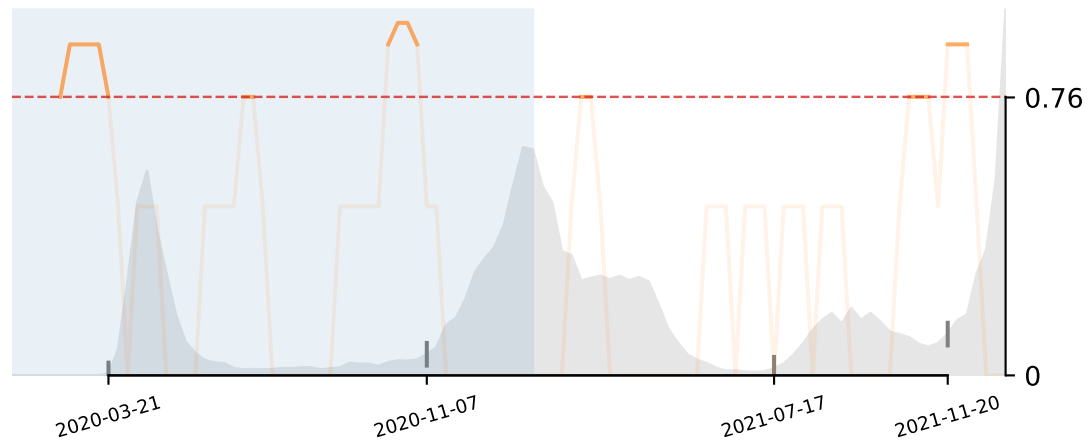

Model 3

- (GT) covid
- (GT) covid symptoms
- (GT) nose bleed
- (GT) covid-19
- (GT) covid-19 who
- (GT) sars-cov-2

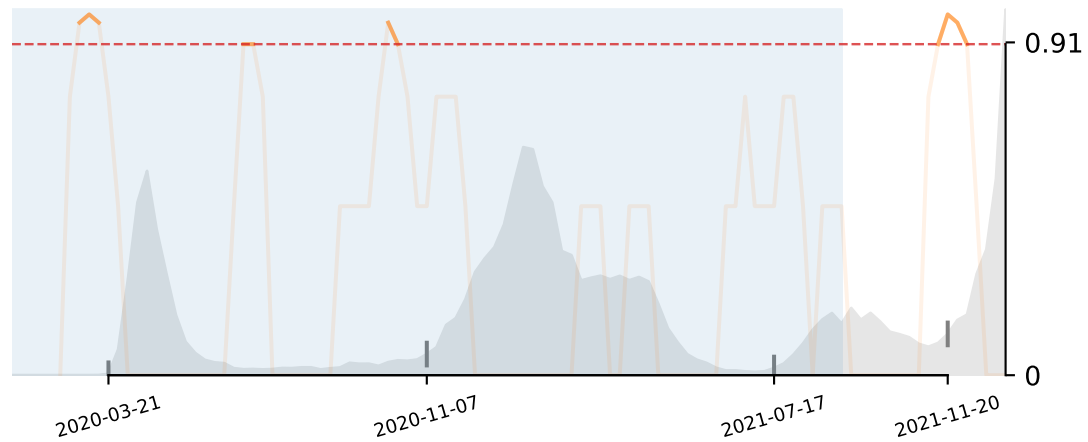

## Performance as a function of $\beta$

| $\beta$ | Training |    |    | Out of sample |    |    |
|---------|----------|----|----|---------------|----|----|
|         | tp       | fp | fn | tp            | fp | fn |
| 1.00    | 0        | 0  | 1  | 0             | 0  | 3  |
| 0.99    | 0        | 0  | 1  | 0             | 0  | 3  |
| 0.96    | 0        | 0  | 1  | 1             | 2  | 2  |
| 0.91    | 1        | 0  | 0  | 2             | 9  | 1  |
| 0.76    | 1        | 0  | 0  | 2             | 22 | 0  |
| 0.46    | 1        | 2  | 0  | 3             | 33 | 0  |
| 0.00    | 1        | 3  | 0  | 3             | 67 | 0  |

| $\beta$ | tp fp fn |    |   | tp fp fn |    |   |
|---------|----------|----|---|----------|----|---|
|         | 1.00     | 0  | 0 | 2        | 0  | 0 |
| 0.99    | 0        | 0  | 2 | 0        | 0  | 2 |
| 0.96    | 0        | 0  | 2 | 0        | 0  | 2 |
| 0.91    | 1        | 0  | 1 | 1        | 2  | 1 |
| 0.76    | 2        | 0  | 0 | 1        | 4  | 1 |
| 0.46    | 2        | 3  | 0 | 2        | 14 | 0 |
| 0.00    | 2        | 18 | 0 | 2        | 35 | 0 |

| $\beta$ | tp fp fn |    |   | tp fp fn |    |   |
|---------|----------|----|---|----------|----|---|
|         | 1.00     | 0  | 0 | 3        | 0  | 0 |
| 0.99    | 0        | 0  | 3 | 1        | 0  | 0 |
| 0.96    | 1        | 0  | 2 | 1        | 1  | 0 |
| 0.91    | 2        | 0  | 1 | 1        | 2  | 0 |
| 0.76    | 2        | 2  | 1 | 1        | 2  | 0 |
| 0.46    | 3        | 9  | 0 | 1        | 3  | 0 |
| 0.00    | 3        | 27 | 0 | 1        | 10 | 0 |

## Proxies selected by the Multiple Sources method

Model 1

- (GT) covid
- (GT) loss smell
- (GT) covid-19
- (GT) loss taste
- (GT) chest pain
- (GT) covid symptoms

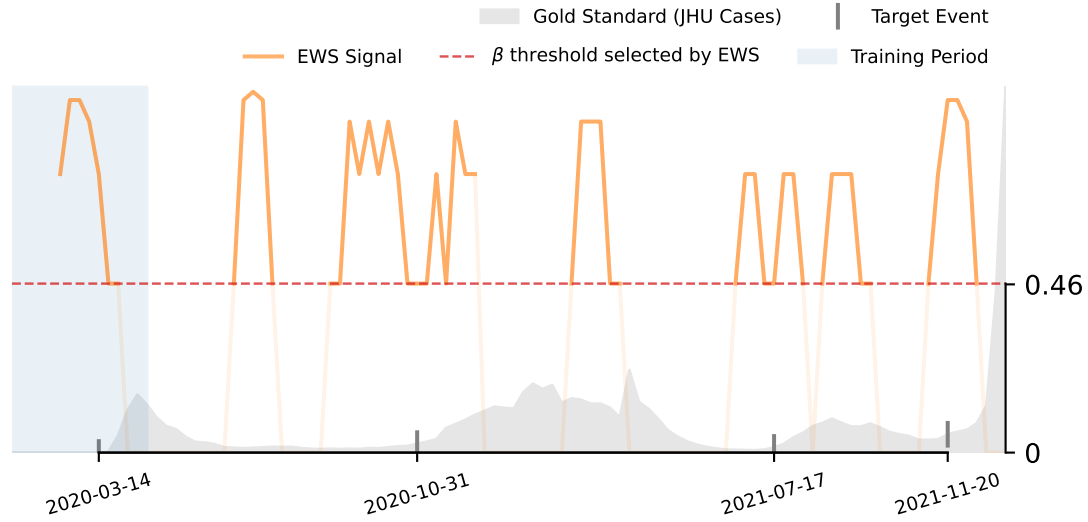

Model 2

- (GT) nose bleed
- (GT) covid-19
- (GT) covid symptoms
- (GT) quarantine
- (GT) sars-cov-2
- (GT) Ageusia

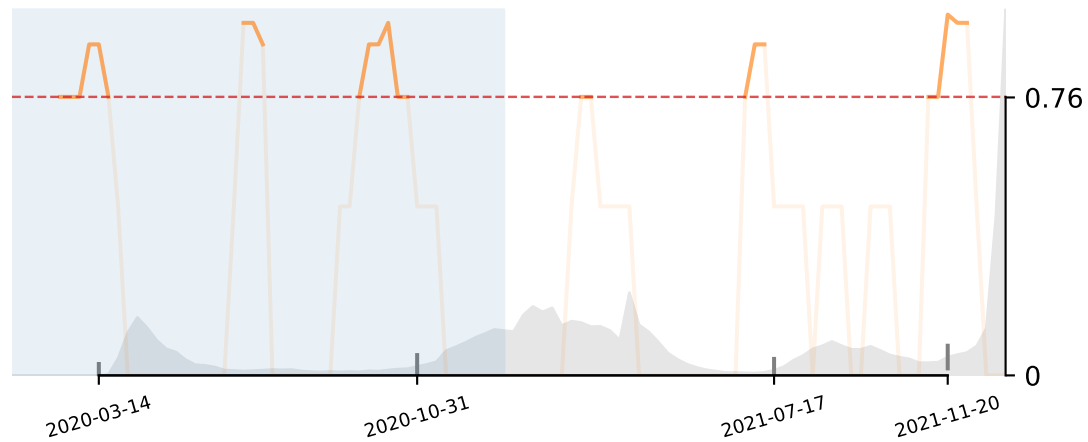

Model 3

- (GT) Shortness of breath
- Twitter (state level signal)
- (GT) covid
- (GT) covid symptoms
- (GT) quarantine
- (GT) Ageusia

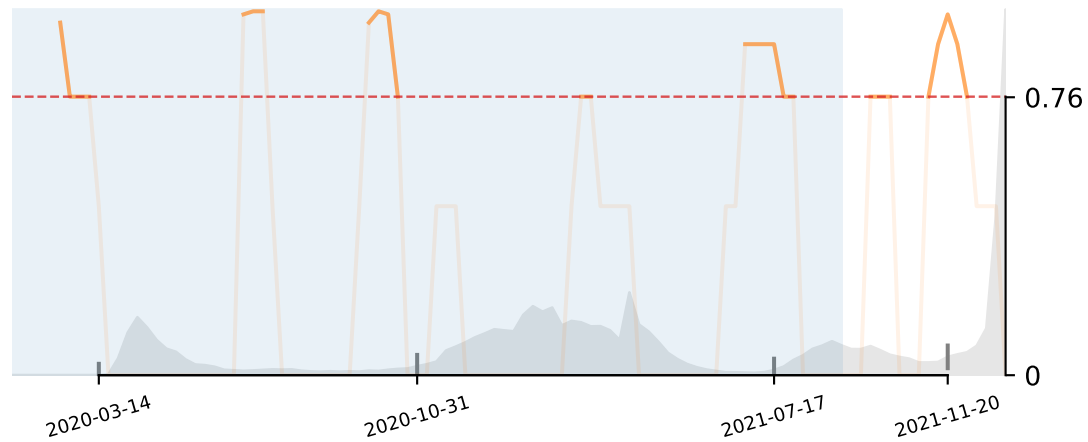

## Performance as a function of $\beta$

| $\beta$ | Training |    |    | Out of sample |    |    |
|---------|----------|----|----|---------------|----|----|
|         | tp       | fp | fn | tp            | fp | fn |
| 1.00    | 0        | 0  | 1  | 0             | 0  | 3  |
| 0.99    | 0        | 0  | 1  | 0             | 1  | 3  |
| 0.96    | 0        | 0  | 1  | 1             | 4  | 2  |
| 0.91    | 1        | 0  | 0  | 2             | 10 | 1  |
| 0.76    | 1        | 0  | 0  | 3             | 18 | 0  |
| 0.46    | 1        | 0  | 0  | 3             | 32 | 0  |
| 0.00    | 1        | 2  | 0  | 3             | 68 | 0  |

| $\beta$ | tp |    |    | fp |    |    | fn |    |    |
|---------|----|----|----|----|----|----|----|----|----|
|         | tp | fp | fn | tp | fp | fn | tp | fp | fn |
| 1.00    | 0  | 0  | 2  | 0  | 0  | 2  | 0  | 0  | 2  |
| 0.99    | 0  | 0  | 2  | 1  | 0  | 1  | 1  | 0  | 1  |
| 0.96    | 0  | 0  | 2  | 1  | 2  | 1  | 1  | 2  | 1  |
| 0.91    | 1  | 2  | 1  | 2  | 2  | 0  | 2  | 2  | 0  |
| 0.76    | 2  | 4  | 0  | 2  | 4  | 0  | 2  | 4  | 0  |
| 0.46    | 2  | 6  | 0  | 2  | 18 | 0  | 2  | 18 | 0  |
| 0.00    | 2  | 12 | 0  | 2  | 38 | 0  | 2  | 38 | 0  |

| $\beta$ | tp |    |    | fp |    |    | fn |    |    |
|---------|----|----|----|----|----|----|----|----|----|
|         | tp | fp | fn | tp | fp | fn | tp | fp | fn |
| 1.00    | 0  | 0  | 3  | 0  | 0  | 1  | 0  | 0  | 1  |
| 0.99    | 1  | 2  | 2  | 1  | 0  | 0  | 1  | 0  | 0  |
| 0.96    | 1  | 3  | 2  | 1  | 0  | 0  | 1  | 0  | 0  |
| 0.91    | 2  | 4  | 1  | 1  | 1  | 0  | 1  | 1  | 0  |
| 0.76    | 3  | 4  | 0  | 1  | 4  | 0  | 1  | 4  | 0  |
| 0.46    | 3  | 8  | 0  | 1  | 7  | 0  | 1  | 7  | 0  |
| 0.00    | 3  | 19 | 0  | 1  | 10 | 0  | 1  | 10 | 0  |



## Proxies selected by the Multiple Sources method

Model 1

- (GT) covid
- (GT) how long does covid last
- (GT) loss smell
- (GT) covid-19
- (GT) loss taste
- (GT) chest pain

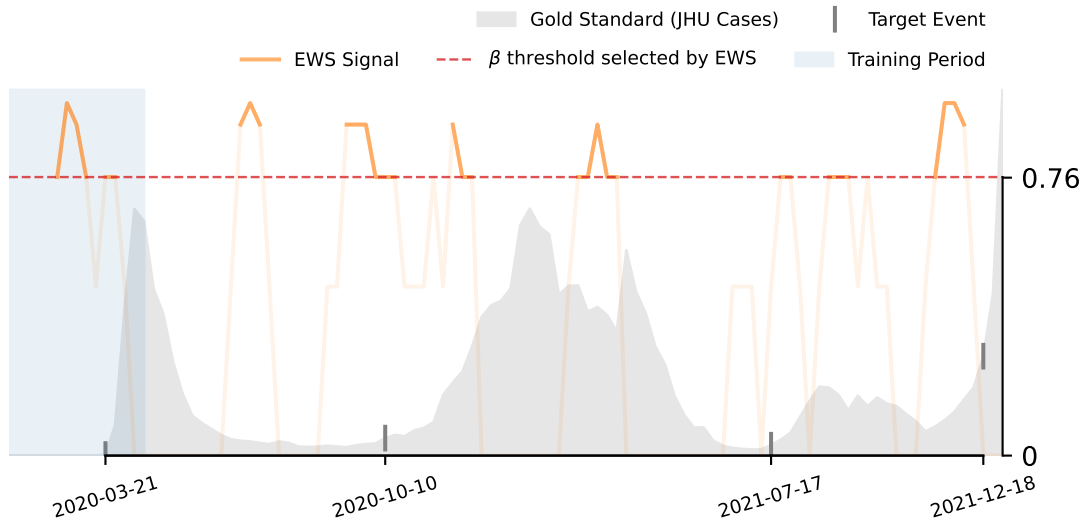

Model 2

- (GT) how long does covid last
- (GT) nose bleed
- (GT) loss smell
- (GT) covid-19
- (GT) covid symptoms
- (GT) sars-cov-2

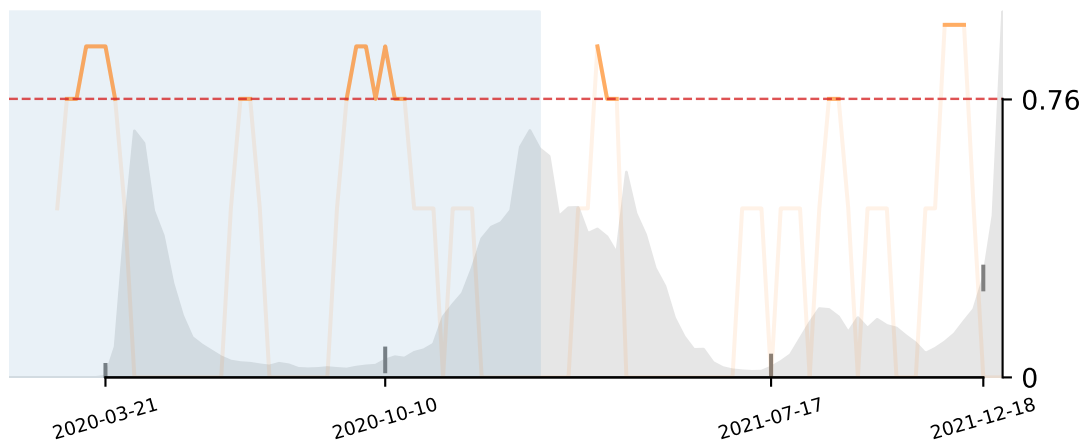

Model 3

- (GT) Asthma
- (GT) covid
- (GT) covid symptoms
- (GT) Ageusia
- (GT) chest pain
- (GT) Bronchitis

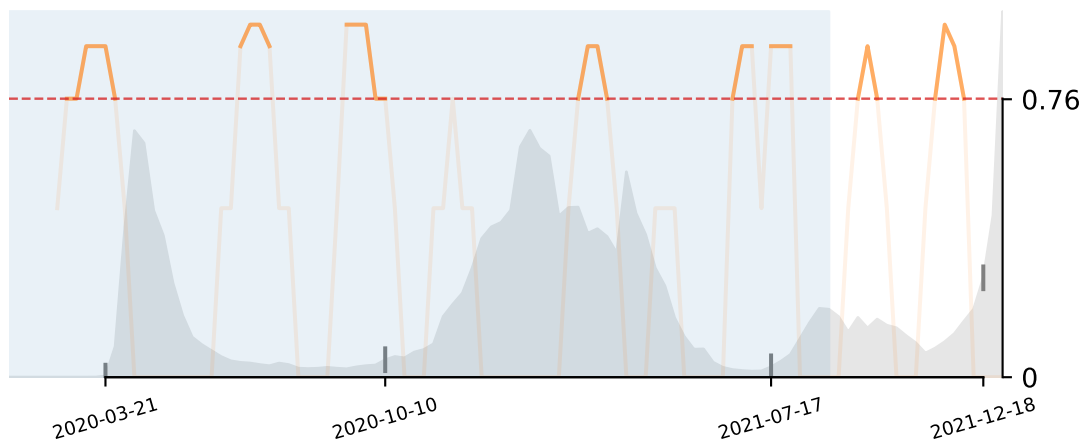

## Performance as a function of $\beta$

| $\beta$ | Training |    |    | Out of sample |    |    |
|---------|----------|----|----|---------------|----|----|
|         | tp       | fp | fn | tp            | fp | fn |
| 1.00    | 0        | 0  | 1  | 0             | 0  | 3  |
| 0.99    | 0        | 0  | 1  | 0             | 0  | 3  |
| 0.96    | 0        | 0  | 1  | 1             | 1  | 2  |
| 0.91    | 1        | 0  | 0  | 2             | 5  | 1  |
| 0.76    | 1        | 0  | 0  | 2             | 19 | 0  |
| 0.46    | 1        | 2  | 0  | 3             | 31 | 0  |
| 0.00    | 1        | 3  | 0  | 3             | 68 | 0  |

| $\beta$ | tp fp fn |    |   | tp fp fn |    |   |
|---------|----------|----|---|----------|----|---|
|         | 1.00     | 0  | 0 | 2        | 0  | 0 |
| 0.99    | 0        | 0  | 2 | 0        | 0  | 2 |
| 0.96    | 0        | 0  | 2 | 1        | 0  | 1 |
| 0.91    | 0        | 0  | 2 | 1        | 1  | 1 |
| 0.76    | 2        | 0  | 0 | 1        | 5  | 1 |
| 0.46    | 2        | 5  | 0 | 2        | 15 | 0 |
| 0.00    | 2        | 16 | 0 | 2        | 34 | 0 |

| $\beta$ | tp fp fn |    |   | tp fp fn |    |   |
|---------|----------|----|---|----------|----|---|
|         | 1.00     | 0  | 0 | 3        | 0  | 0 |
| 0.99    | 0        | 0  | 3 | 0        | 0  | 1 |
| 0.96    | 0        | 0  | 3 | 1        | 0  | 0 |
| 0.91    | 1        | 2  | 2 | 1        | 1  | 0 |
| 0.76    | 3        | 8  | 0 | 1        | 3  | 0 |
| 0.46    | 3        | 12 | 0 | 1        | 5  | 0 |
| 0.00    | 3        | 29 | 0 | 1        | 11 | 0 |

## Proxies selected by the Multiple Sources method

Model 1

- (GT) covid
- (GT) how long does covid last
- (GT) loss smell
- (GT) covid-19
- (GT) loss taste
- (GT) chest pain

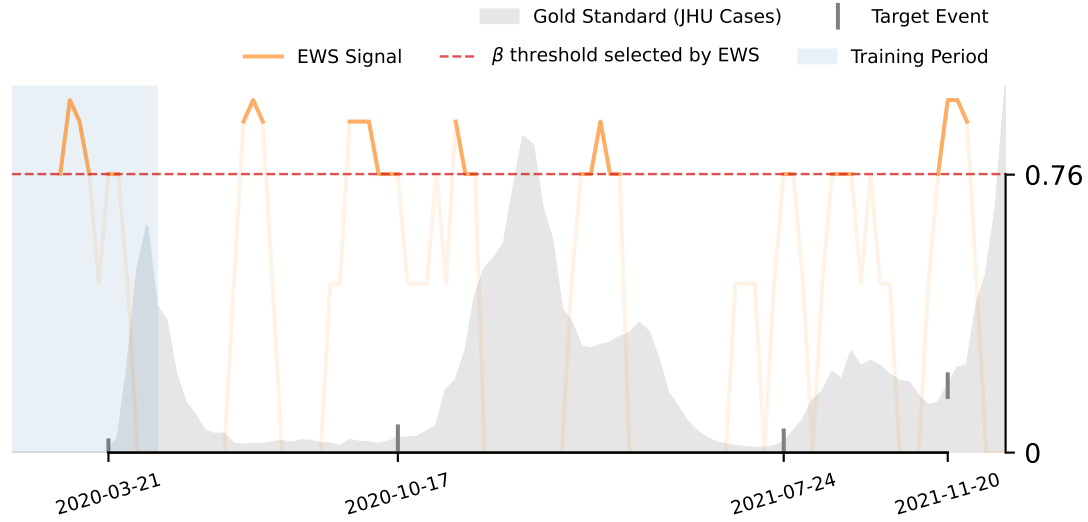

Model 2

- (GT) how long does covid last
- (GT) nose bleed
- (GT) loss smell
- (GT) covid-19
- (GT) covid symptoms
- (GT) sars-cov-2

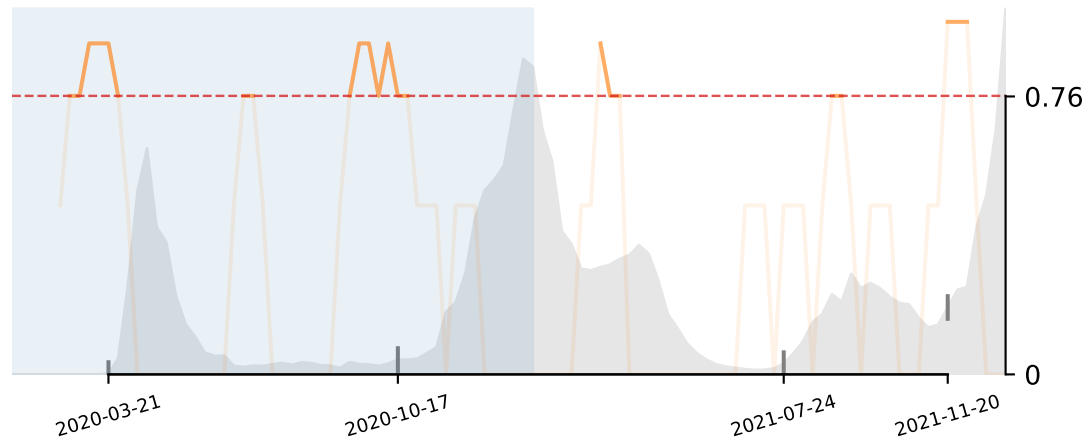

Model 3

- (GT) covid-19
- (GT) covid
- (GT) covid symptoms
- (GT) Anosmia
- (GT) chest pain
- (GT) Viral pneumonia

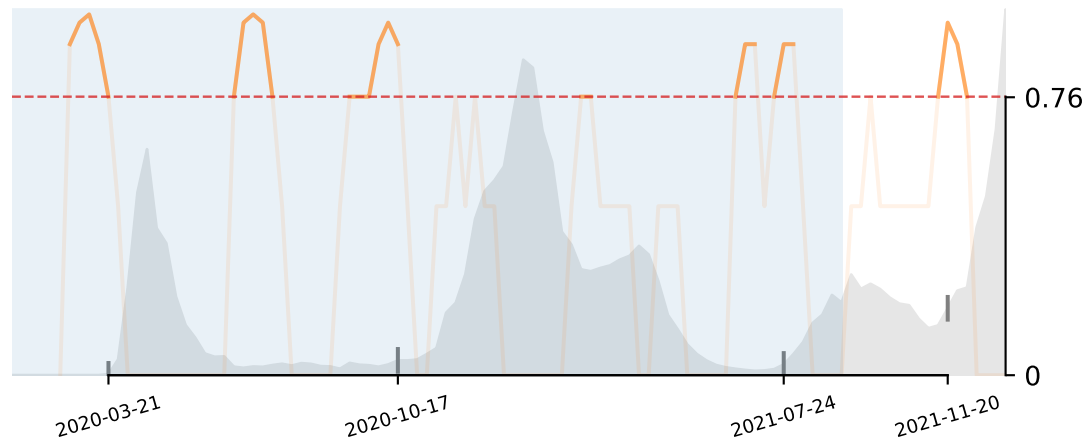

## Performance as a function of $\beta$

| $\beta$ | Training |    |    | Out of sample |    |    |
|---------|----------|----|----|---------------|----|----|
|         | tp       | fp | fn | tp            | fp | fn |
| 1.00    | 0        | 0  | 1  | 0             | 0  | 3  |
| 0.99    | 0        | 0  | 1  | 0             | 0  | 3  |
| 0.96    | 0        | 0  | 1  | 1             | 2  | 2  |
| 0.91    | 1        | 0  | 0  | 2             | 7  | 1  |
| 0.76    | 1        | 0  | 0  | 3             | 19 | 0  |
| 0.46    | 1        | 2  | 0  | 3             | 32 | 0  |
| 0.00    | 1        | 3  | 0  | 3             | 67 | 0  |

| $\beta$ | tp fp fn |    |   | tp fp fn |    |   |
|---------|----------|----|---|----------|----|---|
|         | 1.00     | 0  | 0 | 2        | 0  | 0 |
| 0.99    | 0        | 0  | 2 | 0        | 0  | 2 |
| 0.96    | 0        | 0  | 2 | 1        | 2  | 1 |
| 0.91    | 0        | 0  | 2 | 1        | 3  | 1 |
| 0.76    | 2        | 0  | 0 | 1        | 7  | 1 |
| 0.46    | 2        | 5  | 0 | 2        | 16 | 0 |
| 0.00    | 2        | 16 | 0 | 2        | 35 | 0 |

| $\beta$ | tp fp fn |    |   | tp fp fn |    |   |
|---------|----------|----|---|----------|----|---|
|         | 1.00     | 0  | 0 | 3        | 0  | 0 |
| 0.99    | 0        | 0  | 3 | 0        | 0  | 1 |
| 0.96    | 1        | 1  | 2 | 1        | 0  | 0 |
| 0.91    | 2        | 3  | 1 | 1        | 1  | 0 |
| 0.76    | 3        | 4  | 0 | 1        | 3  | 0 |
| 0.46    | 3        | 12 | 0 | 1        | 6  | 0 |
| 0.00    | 3        | 30 | 0 | 1        | 10 | 0 |

## Proxies selected by the Multiple Sources method

Model 1

- (GT) covid
- (GT) covid-19
- (GT) covid symptoms
- (GT) chest tightness
- (GT) quarantine
- (GT) Abdominal pain

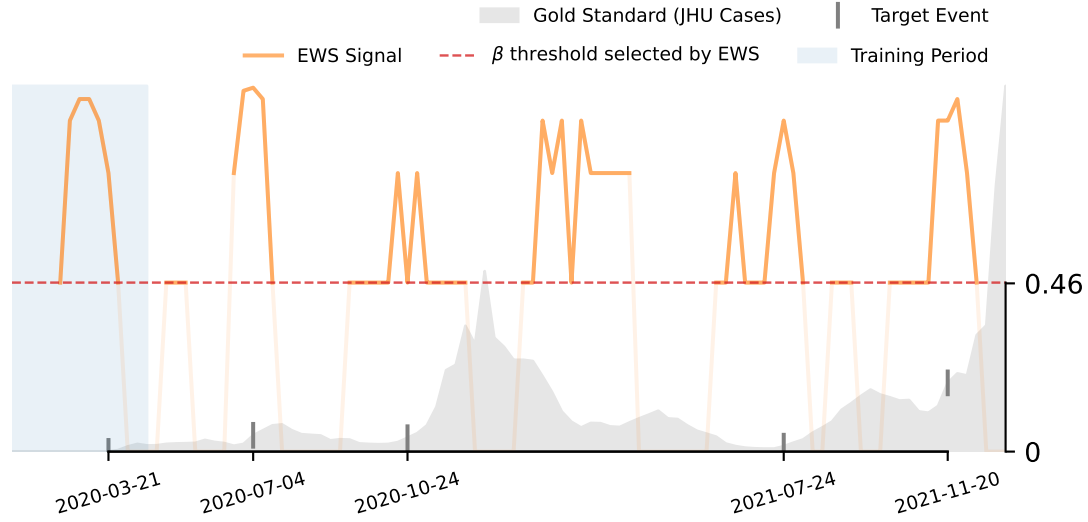

Model 2

- (GT) covid
- (GT) covid-19
- (GT) covid symptoms
- (GT) chest tightness
- (GT) quarantine
- (GT) Acute bronchitis

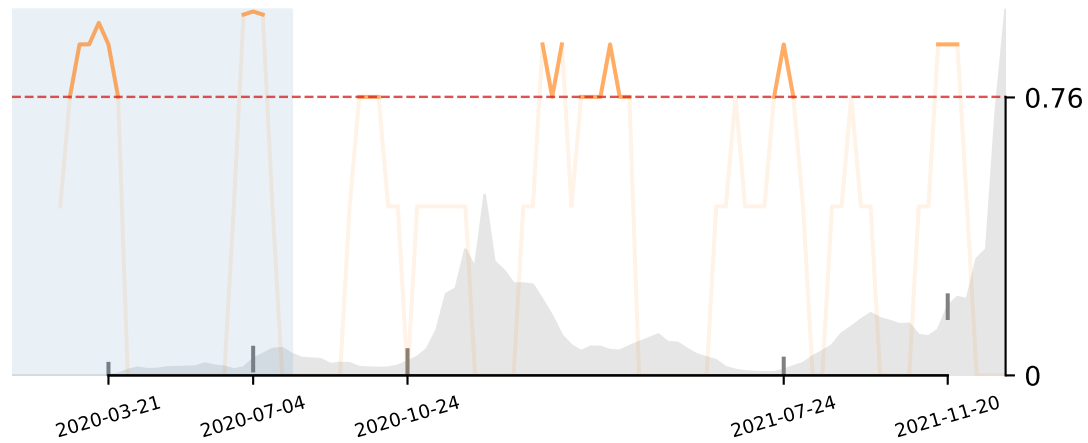

Model 3

- (GT) covid
- (GT) covid symptoms
- (GT) Acute bronchitis
- (GT) Anosmia
- (GT) Asthma
- (GT) Bronchitis

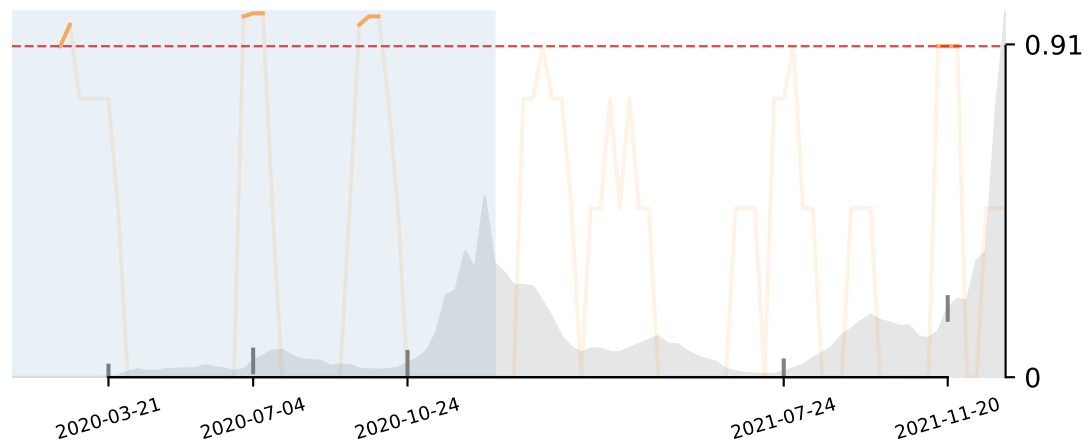

## Performance as a function of $\beta$

| $\beta$ | Training |    |    | Out of sample |    |    |
|---------|----------|----|----|---------------|----|----|
|         | tp       | fp | fn | tp            | fp | fn |
| 1.00    | 0        | 0  | 1  | 1             | 0  | 3  |
| 0.99    | 0        | 0  | 1  | 1             | 0  | 3  |
| 0.96    | 0        | 0  | 1  | 1             | 2  | 2  |
| 0.91    | 1        | 0  | 0  | 3             | 5  | 1  |
| 0.76    | 1        | 0  | 0  | 4             | 14 | 0  |
| 0.46    | 1        | 0  | 0  | 4             | 32 | 0  |
| 0.00    | 1        | 2  | 0  | 4             | 61 | 0  |

| $\beta$ | tp |    |    | fp |    |    | fn |    |    |
|---------|----|----|----|----|----|----|----|----|----|
|         | tp | fp | fn | tp | fp | fn | tp | fp | fn |
| 1.00    | 0  | 0  | 2  | 0  | 0  | 3  | 0  | 0  | 3  |
| 0.99    | 1  | 0  | 1  | 0  | 0  | 3  | 0  | 0  | 3  |
| 0.96    | 1  | 1  | 1  | 0  | 0  | 3  | 0  | 0  | 3  |
| 0.91    | 2  | 1  | 0  | 2  | 4  | 1  | 2  | 4  | 1  |
| 0.76    | 2  | 1  | 0  | 3  | 12 | 0  | 3  | 12 | 0  |
| 0.46    | 2  | 2  | 0  | 3  | 28 | 0  | 3  | 28 | 0  |
| 0.00    | 2  | 4  | 0  | 3  | 53 | 0  | 3  | 53 | 0  |

| $\beta$ | tp |    |    | fp |    |    | fn |    |    |
|---------|----|----|----|----|----|----|----|----|----|
|         | tp | fp | fn | tp | fp | fn | tp | fp | fn |
| 1.00    | 0  | 0  | 3  | 0  | 0  | 2  | 0  | 0  | 2  |
| 0.99    | 1  | 1  | 2  | 0  | 0  | 2  | 0  | 0  | 2  |
| 0.96    | 2  | 1  | 1  | 0  | 0  | 2  | 0  | 0  | 2  |
| 0.91    | 3  | 2  | 0  | 1  | 3  | 0  | 1  | 3  | 0  |
| 0.76    | 3  | 3  | 0  | 2  | 9  | 0  | 2  | 9  | 0  |
| 0.46    | 3  | 3  | 0  | 2  | 23 | 0  | 2  | 23 | 0  |
| 0.00    | 3  | 6  | 0  | 2  | 39 | 0  | 2  | 39 | 0  |

## Proxies selected by the Multiple Sources method

Model 1

- (GT) covid
- (GT) covid-19
- (GT) chest pain
- (GT) chest tightness
- (GT) Burning Chest Pain
- (GT) Hyperventilation

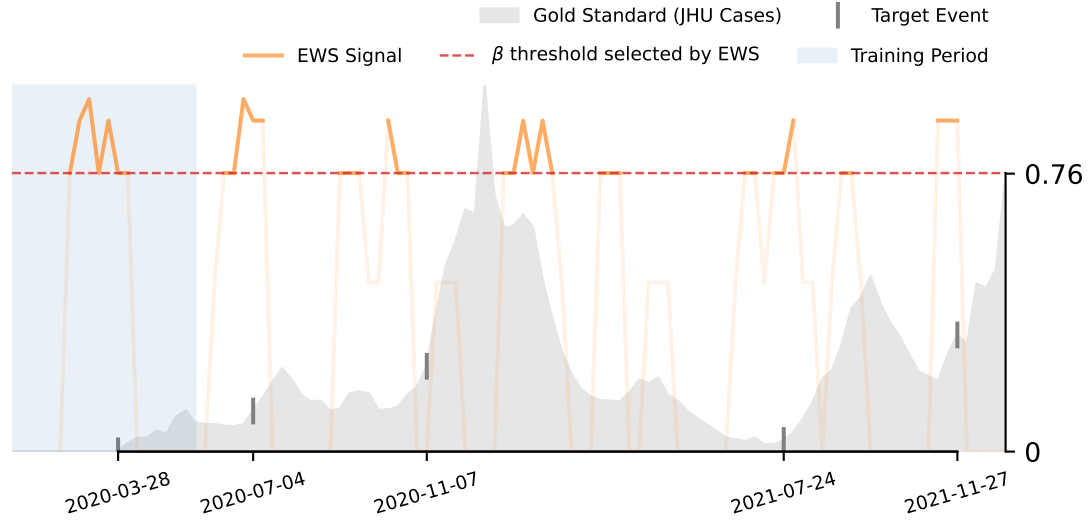

Model 2

- (GT) covid
- (GT) covid-19
- (GT) chest pain
- (GT) Burning Chest Pain
- (GT) Hyperventilation
- (GT) Chest pain

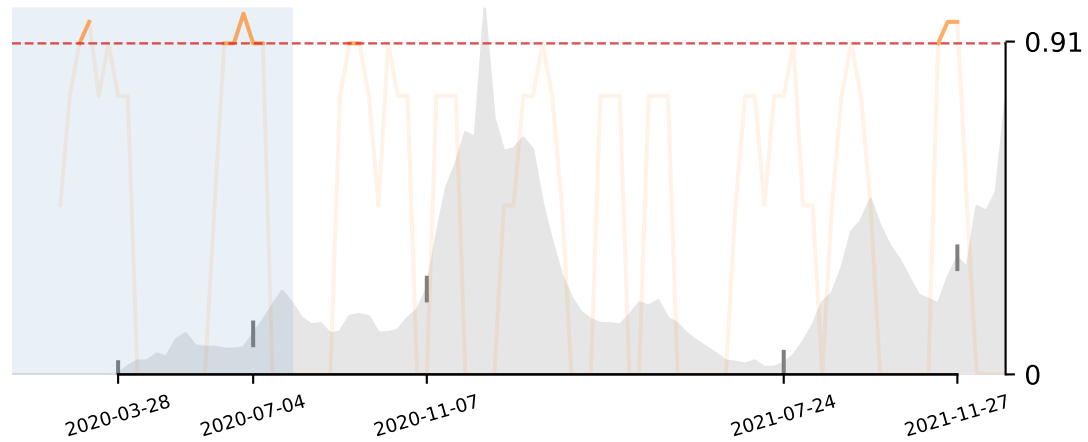

Model 3

- (GT) covid-19
- (GT) chest pain
- (GT) covid
- (GT) quarantine
- (GT) Chills
- (GT) Diarrhea

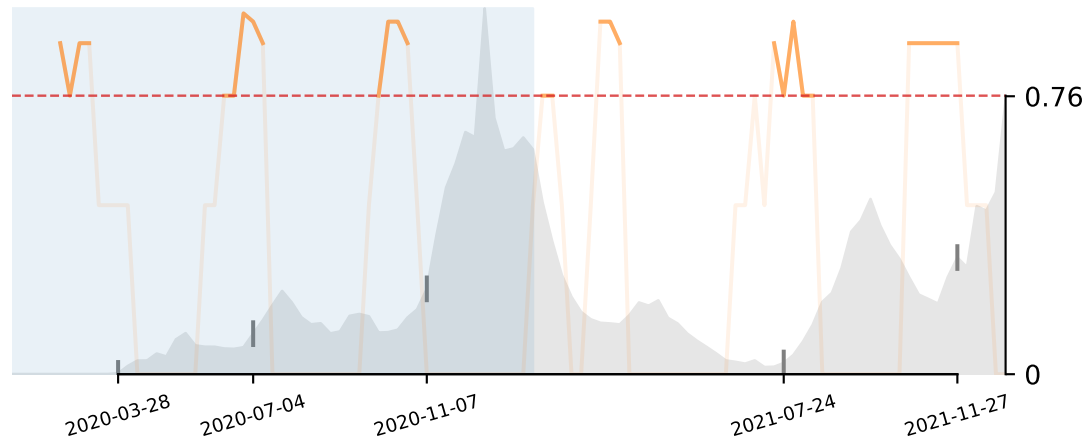

## Performance as a function of $\beta$

| $\beta$ | Training |    |    | Out of sample |    |    |
|---------|----------|----|----|---------------|----|----|
|         | tp       | fp | fn | tp            | fp | fn |
| 1.00    | 0        | 0  | 1  | 0             | 0  | 4  |
| 0.99    | 0        | 0  | 1  | 0             | 0  | 4  |
| 0.96    | 0        | 0  | 1  | 1             | 0  | 3  |
| 0.91    | 1        | 0  | 0  | 3             | 4  | 0  |
| 0.76    | 1        | 0  | 0  | 4             | 16 | 0  |
| 0.46    | 1        | 2  | 0  | 4             | 27 | 0  |
| 0.00    | 1        | 2  | 0  | 4             | 57 | 0  |

| $\beta$ | tp |    |    | fp |    |    | fn |    |    |
|---------|----|----|----|----|----|----|----|----|----|
|         | tp | fp | fn | tp | fp | fn | tp | fp | fn |
| 1.00    | 0  | 0  | 2  | 0  | 0  | 3  | 0  | 0  | 3  |
| 0.99    | 0  | 0  | 2  | 0  | 0  | 3  | 0  | 0  | 3  |
| 0.96    | 1  | 0  | 1  | 1  | 0  | 2  | 1  | 0  | 2  |
| 0.91    | 2  | 0  | 0  | 2  | 5  | 0  | 2  | 5  | 0  |
| 0.76    | 2  | 1  | 0  | 3  | 20 | 0  | 3  | 20 | 0  |
| 0.46    | 2  | 3  | 0  | 3  | 28 | 0  | 3  | 28 | 0  |
| 0.00    | 2  | 4  | 0  | 3  | 53 | 0  | 3  | 53 | 0  |

| $\beta$ | tp |    |    | fp |    |    | fn |    |    |
|---------|----|----|----|----|----|----|----|----|----|
|         | tp | fp | fn | tp | fp | fn | tp | fp | fn |
| 1.00    | 0  | 0  | 3  | 0  | 0  | 2  | 0  | 0  | 2  |
| 0.99    | 0  | 0  | 3  | 0  | 0  | 2  | 0  | 0  | 2  |
| 0.96    | 1  | 0  | 2  | 0  | 3  | 1  | 0  | 3  | 1  |
| 0.91    | 2  | 0  | 1  | 2  | 4  | 0  | 2  | 4  | 0  |
| 0.76    | 3  | 2  | 0  | 2  | 8  | 0  | 2  | 8  | 0  |
| 0.46    | 3  | 4  | 0  | 2  | 13 | 0  | 2  | 13 | 0  |
| 0.00    | 3  | 8  | 0  | 2  | 35 | 0  | 2  | 35 | 0  |

## Proxies selected by the Multiple Sources method

Model 1

- (GT) covid
- (GT) covid-19
- (GT) covid symptoms
- (GT) chest tightness
- (GT) quarantine
- (GT) sars-cov-2

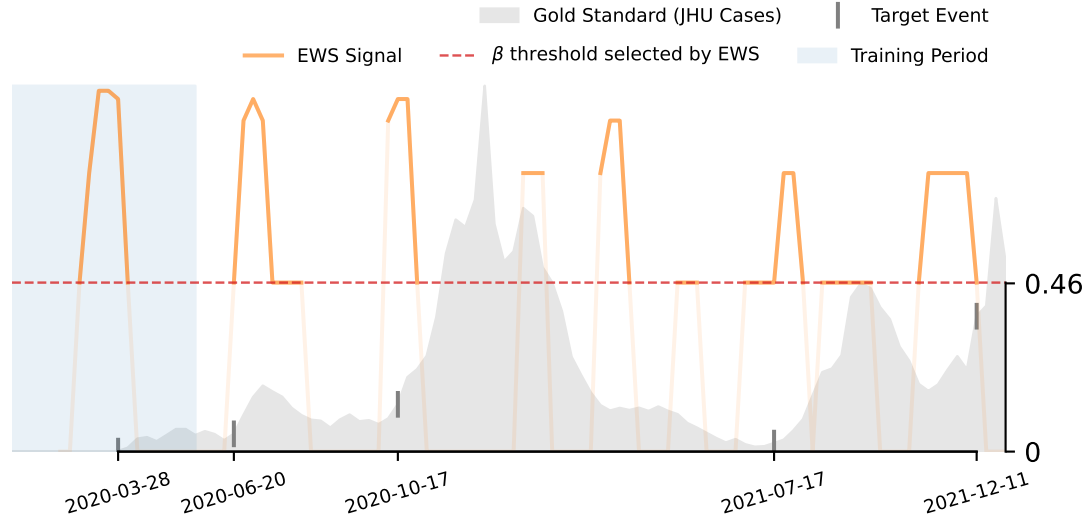

Model 2

- (GT) covid symptoms
- (GT) Otitis
- (GT) Phlegm

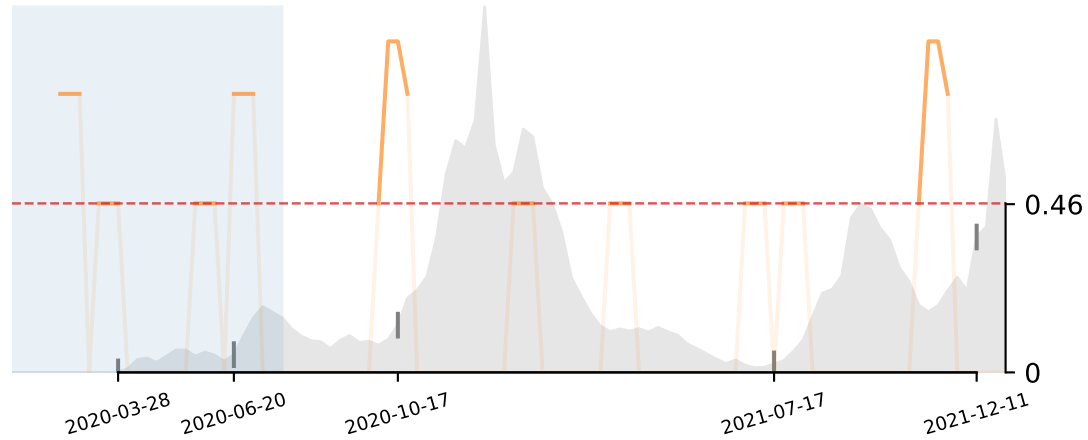

Model 3

- (GT) covid symptoms
- (GT) Otitis
- (GT) Phlegm
- (GT) Ageusia
- (GT) Anosmia
- (GT) quarantine

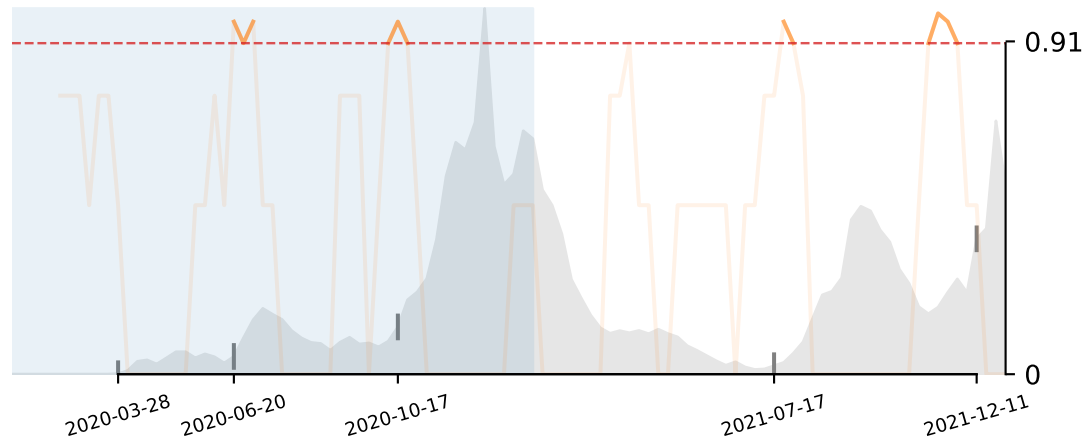

## Performance as a function of $\beta$

| $\beta$ | Training |    |    | Out of sample |    |    |
|---------|----------|----|----|---------------|----|----|
|         | tp       | fp | fn | tp            | fp | fn |
| 1.00    | 0        | 0  | 1  | 0             | 0  | 4  |
| 0.99    | 0        | 0  | 1  | 0             | 0  | 4  |
| 0.96    | 1        | 0  | 0  | 1             | 2  | 2  |
| 0.91    | 1        | 0  | 0  | 1             | 6  | 2  |
| 0.76    | 1        | 0  | 0  | 2             | 12 | 0  |
| 0.46    | 1        | 0  | 0  | 4             | 28 | 0  |
| 0.00    | 1        | 1  | 0  | 4             | 59 | 0  |

| $\beta$ | tp fp fn |   |   | tp fp fn |    |   |
|---------|----------|---|---|----------|----|---|
|         | 0.91     | 0 | 0 | 2        | 2  | 0 |
| 0.76    | 0        | 0 | 2 | 2        | 1  | 1 |
| 0.46    | 2        | 4 | 0 | 3        | 10 | 0 |
| 0.00    | 2        | 4 | 0 | 3        | 54 | 0 |

| $\beta$ | tp fp fn |    |   | tp fp fn |    |   |
|---------|----------|----|---|----------|----|---|
|         | 1.00     | 0  | 0 | 3        | 0  | 0 |
| 0.99    | 0        | 0  | 3 | 1        | 0  | 1 |
| 0.96    | 0        | 0  | 3 | 1        | 1  | 0 |
| 0.91    | 2        | 1  | 1 | 1        | 3  | 0 |
| 0.76    | 2        | 3  | 1 | 2        | 6  | 0 |
| 0.46    | 3        | 7  | 0 | 2        | 12 | 0 |
| 0.00    | 3        | 13 | 0 | 2        | 35 | 0 |

## Proxies selected by the Multiple Sources method

Model 1

- (GT) covid
- (GT) how long does covid last
- (GT) covid-19
- (GT) covid symptoms
- (GT) chest tightness
- (GT) quarantine

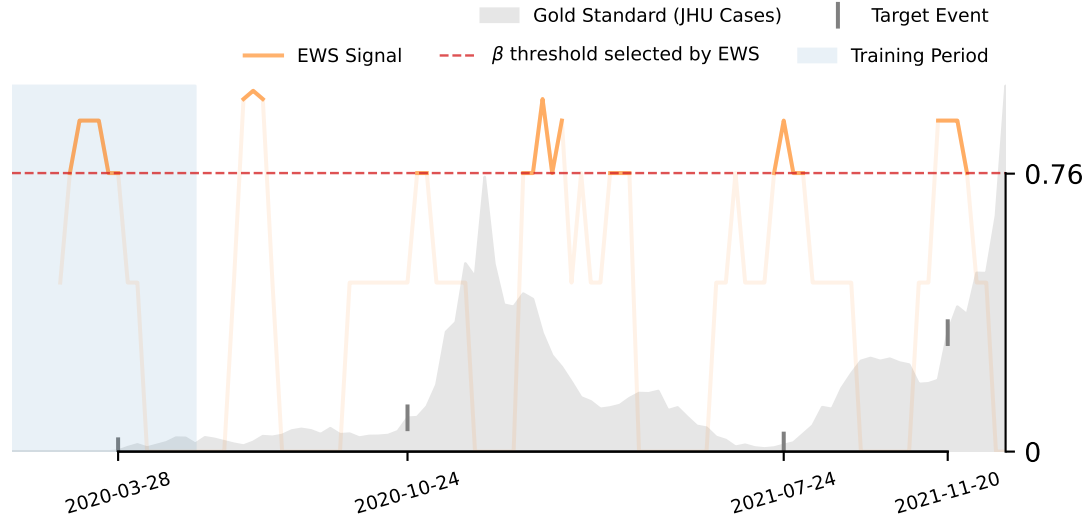

Model 2

- (GT) how long does covid last
- (GT) covid
- (GT) covid symptoms
- (GT) Otitis

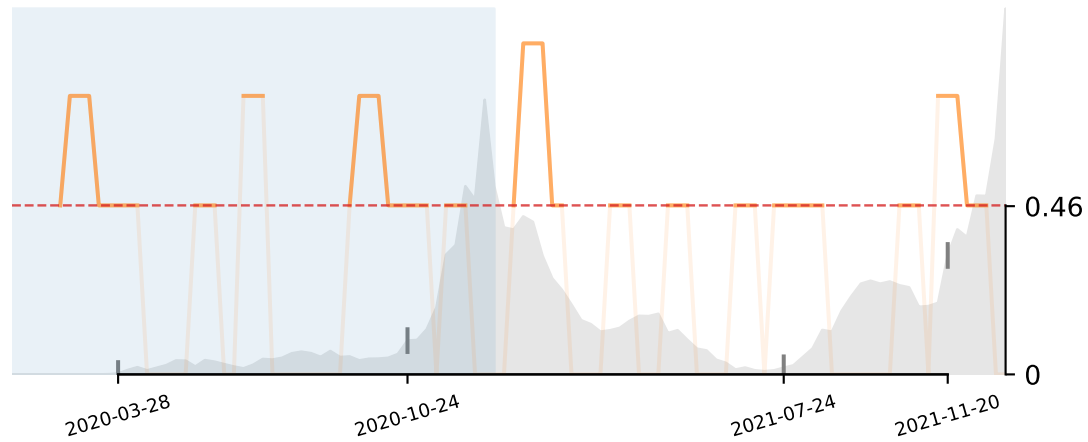

Model 3

- (GT) covid
- (GT) covid symptoms
- (GT) how long does covid last
- (GT) Asthma
- (GT) Nasal congestion
- Twitter (state level signal)

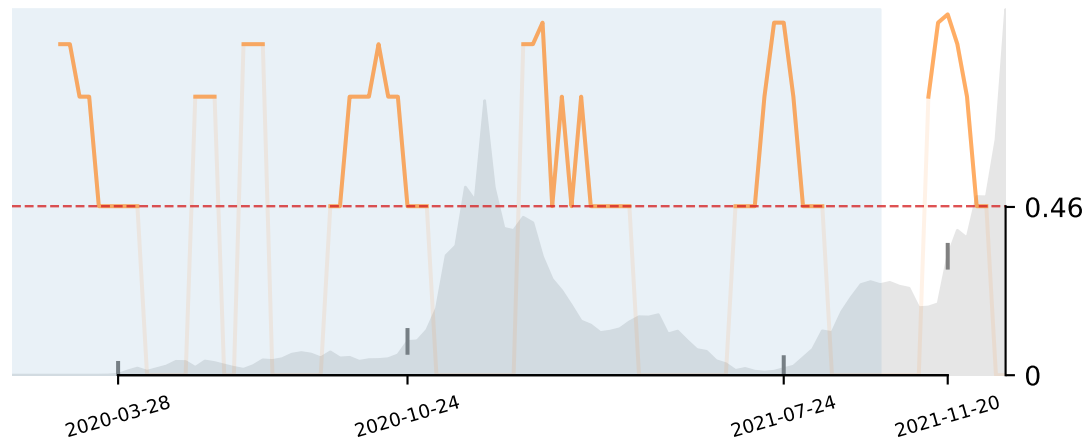

## Performance as a function of $\beta$

| $\beta$ | Training |    |    | Out of sample |    |    |
|---------|----------|----|----|---------------|----|----|
|         | tp       | fp | fn | tp            | fp | fn |
| 1.00    | 0        | 0  | 1  | 0             | 0  | 3  |
| 0.99    | 0        | 0  | 1  | 0             | 1  | 3  |
| 0.96    | 0        | 0  | 1  | 0             | 4  | 3  |
| 0.91    | 0        | 0  | 1  | 2             | 6  | 1  |
| 0.76    | 1        | 0  | 0  | 2             | 18 | 0  |
| 0.46    | 1        | 1  | 0  | 3             | 35 | 0  |
| 0.00    | 1        | 4  | 0  | 3             | 63 | 0  |

| $\beta$ | tp fp fn |    |   | tp fp fn |    |   |
|---------|----------|----|---|----------|----|---|
|         | 0.96     | 0  | 0 | 2        | 0  | 0 |
| 0.91    | 0        | 0  | 2 | 0        | 3  | 2 |
| 0.76    | 0        | 0  | 2 | 1        | 4  | 1 |
| 0.46    | 2        | 5  | 0 | 2        | 20 | 0 |
| 0.00    | 2        | 17 | 0 | 2        | 39 | 0 |

| $\beta$ | tp fp fn |    |   | tp fp fn |   |   |
|---------|----------|----|---|----------|---|---|
|         | 1.00     | 0  | 0 | 3        | 0 | 0 |
| 0.99    | 0        | 0  | 3 | 1        | 0 | 0 |
| 0.96    | 0        | 0  | 3 | 1        | 0 | 0 |
| 0.91    | 1        | 1  | 2 | 1        | 1 | 0 |
| 0.76    | 2        | 8  | 1 | 1        | 2 | 0 |
| 0.46    | 3        | 16 | 0 | 1        | 4 | 0 |
| 0.00    | 3        | 33 | 0 | 1        | 6 | 0 |

## Proxies selected by the Multiple Sources method

Model 1

- (GT) chest tightness
- (GT) covid-19 who
- (GT) covid
- (GT) covid-19
- (GT) covid symptoms
- (GT) quarantine

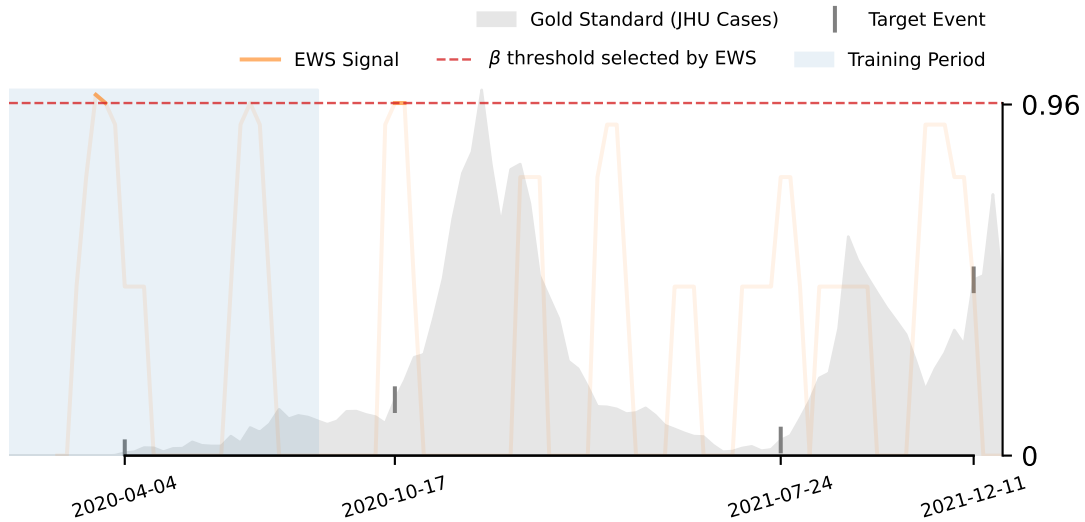

Model 2

- (GT) covid
- (GT) covid-19
- (GT) covid symptoms
- (GT) quarantine

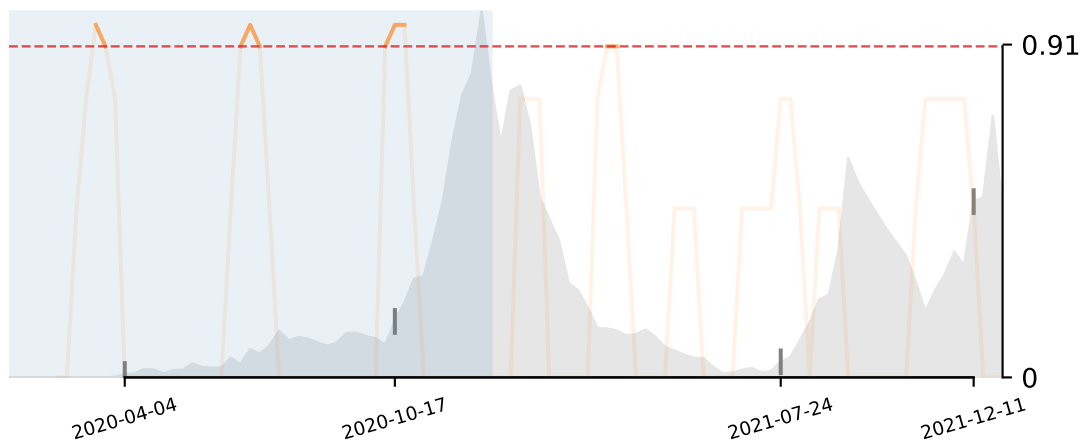

Model 3

- (GT) covid symptoms
- (GT) quarantine
- (GT) covid
- (GT) fever
- (GT) Fatigue
- (GT) Sore throat

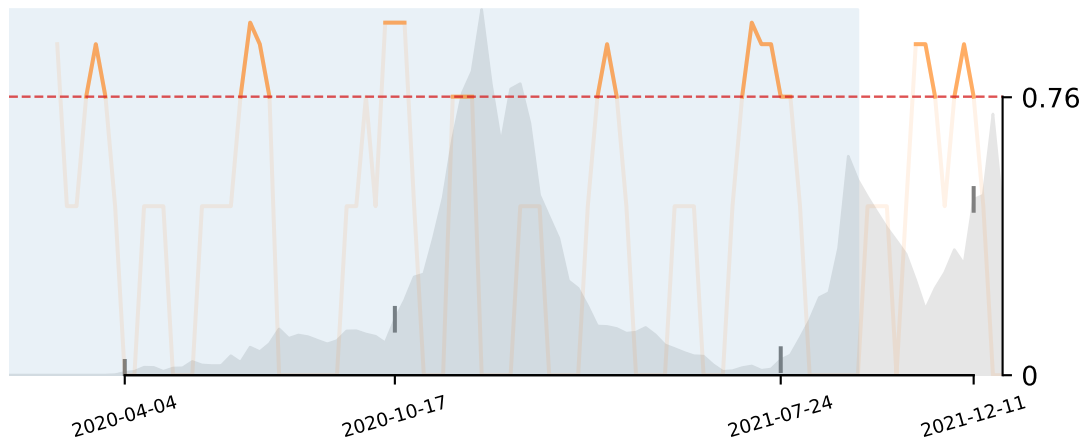

## Performance as a function of $\beta$

| $\beta$ | Training |    |    | Out of sample |    |    |
|---------|----------|----|----|---------------|----|----|
|         | tp       | fp | fn | tp            | fp | fn |
| 1.00    | 0        | 0  | 1  | 0             | 0  | 3  |
| 0.99    | 0        | 0  | 1  | 0             | 0  | 3  |
| 0.96    | 1        | 0  | 0  | 1             | 1  | 2  |
| 0.91    | 1        | 1  | 0  | 2             | 3  | 1  |
| 0.76    | 1        | 3  | 0  | 3             | 8  | 0  |
| 0.46    | 1        | 3  | 0  | 3             | 20 | 0  |
| 0.00    | 1        | 8  | 0  | 3             | 50 | 0  |

| $\beta$ | tp fp fn |   |   | tp fp fn |    |   |
|---------|----------|---|---|----------|----|---|
|         | 0.96     | 0 | 0 | 2        | 0  | 0 |
| 0.91    | 2        | 2 | 0 | 0        | 2  | 2 |
| 0.76    | 2        | 4 | 0 | 2        | 7  | 0 |
| 0.46    | 2        | 4 | 0 | 2        | 15 | 0 |
| 0.00    | 2        | 8 | 0 | 2        | 39 | 0 |

| $\beta$ | tp fp fn |    |   | tp fp fn |   |   |
|---------|----------|----|---|----------|---|---|
|         | 1.00     | 0  | 0 | 3        | 0 | 0 |
| 0.99    | 0        | 0  | 3 | 0        | 0 | 1 |
| 0.96    | 0        | 0  | 3 | 0        | 0 | 1 |
| 0.91    | 2        | 2  | 1 | 1        | 0 | 0 |
| 0.76    | 3        | 5  | 0 | 1        | 0 | 0 |
| 0.46    | 3        | 13 | 0 | 1        | 5 | 0 |
| 0.00    | 3        | 34 | 0 | 1        | 8 | 0 |

## Proxies selected by the Multiple Sources method

Model 1

- (GT) covid
- (GT) covid-19
- (GT) covid symptoms
- (GT) quarantine
- (GT) Acute bronchitis
- (GT) Anosmia

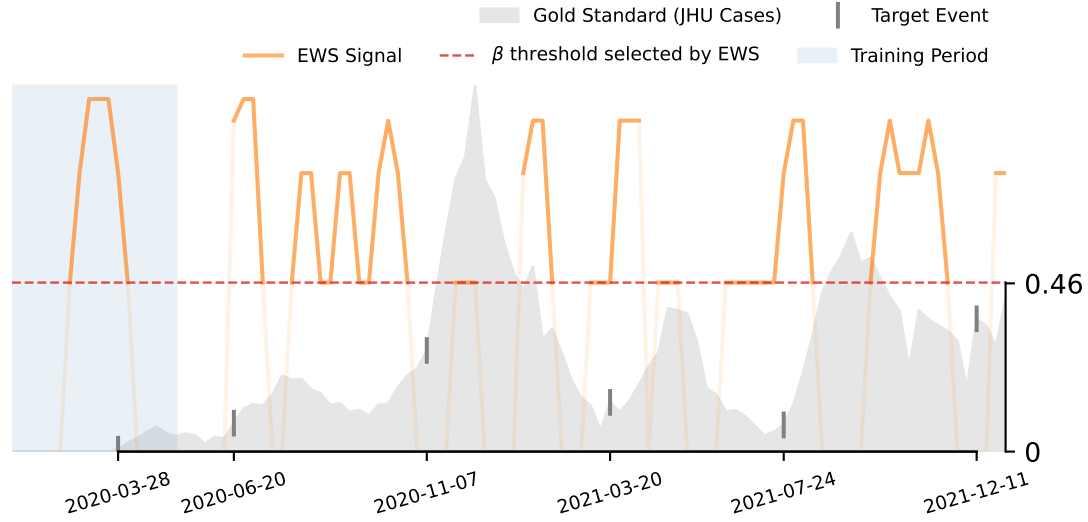

Model 2

- (GT) covid symptoms
- (GT) Anosmia
- (GT) Asthma
- (GT) Cough
- (GT) Nasal congestion
- (GT) Throat irritation

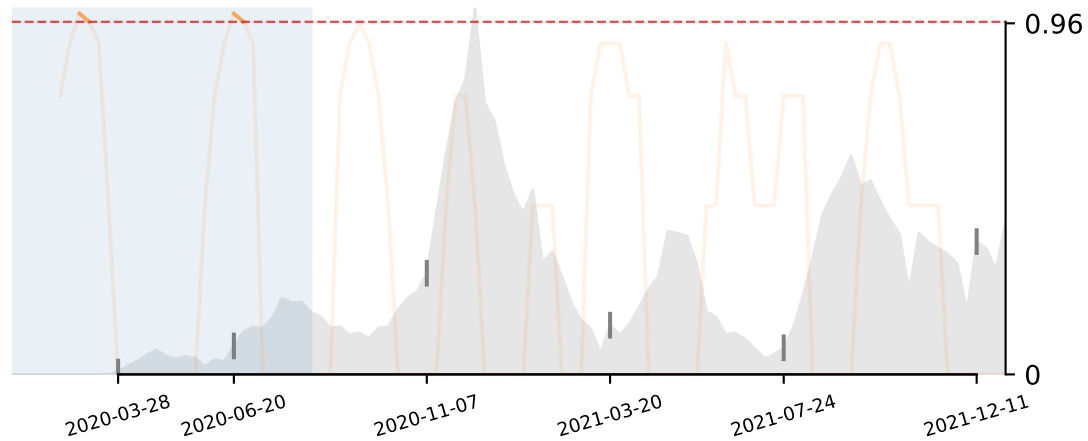

Model 3

- (GT) Anosmia
- (GT) Wheeze
- (GT) Nasal congestion
- (GT) covid
- (GT) covid-19
- (GT) quarantine

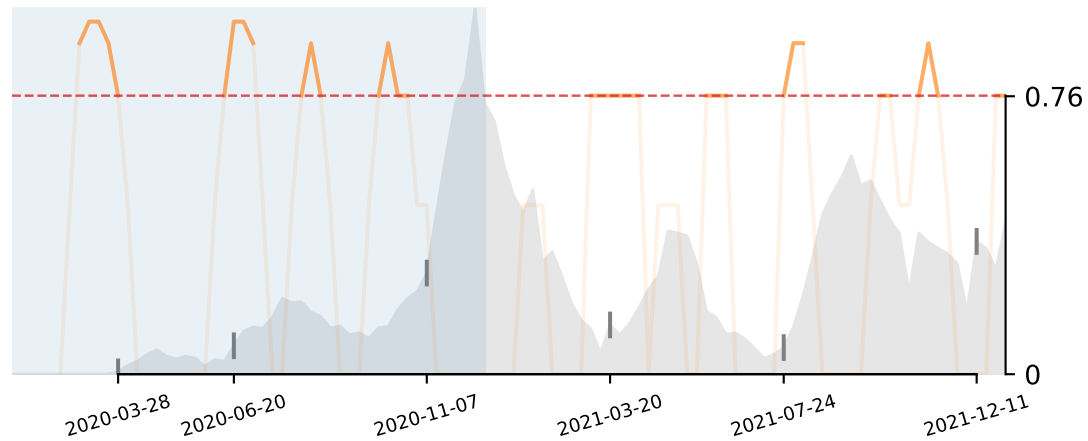

## Performance as a function of $\beta$

| $\beta$ | Training |    |    | Out of sample |    |    |
|---------|----------|----|----|---------------|----|----|
|         | tp       | fp | fn | tp            | fp | fn |
| 1.00    | 0        | 0  | 1  | 0             | 0  | 5  |
| 0.99    | 0        | 0  | 1  | 0             | 0  | 5  |
| 0.96    | 0        | 0  | 1  | 0             | 2  | 4  |
| 0.91    | 1        | 0  | 0  | 3             | 10 | 0  |
| 0.76    | 1        | 0  | 0  | 4             | 20 | 0  |
| 0.46    | 1        | 0  | 0  | 5             | 33 | 0  |
| 0.00    | 1        | 2  | 0  | 5             | 52 | 0  |

| $\beta$ | tp fp fn |   |   | tp fp fn |    |   |
|---------|----------|---|---|----------|----|---|
|         | 1.00     | 0 | 0 | 2        | 0  | 0 |
| 0.99    | 0        | 0 | 2 | 0        | 0  | 4 |
| 0.96    | 2        | 0 | 0 | 0        | 1  | 4 |
| 0.91    | 2        | 1 | 0 | 3        | 5  | 1 |
| 0.76    | 2        | 3 | 0 | 3        | 14 | 1 |
| 0.46    | 2        | 4 | 0 | 4        | 22 | 0 |
| 0.00    | 2        | 4 | 0 | 4        | 44 | 0 |

| $\beta$ | tp fp fn |    |   | tp fp fn |    |   |
|---------|----------|----|---|----------|----|---|
|         | 1.00     | 0  | 0 | 3        | 0  | 0 |
| 0.99    | 0        | 0  | 3 | 0        | 0  | 3 |
| 0.96    | 0        | 0  | 3 | 0        | 0  | 3 |
| 0.91    | 2        | 1  | 1 | 1        | 2  | 1 |
| 0.76    | 3        | 3  | 0 | 3        | 11 | 0 |
| 0.46    | 3        | 6  | 0 | 3        | 21 | 0 |
| 0.00    | 3        | 12 | 0 | 3        | 33 | 0 |



## Proxies selected by the Multiple Sources method

Model 1

- (GT) covid
- (GT) how long does covid last
- (GT) covid-19
- (GT) chest pain
- (GT) covid symptoms
- (GT) chest tightness

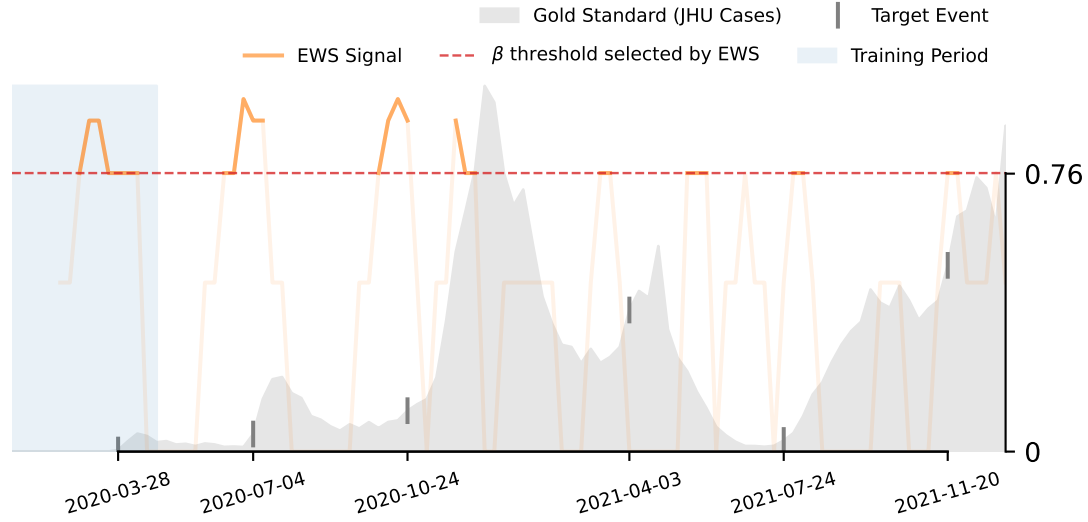

## Performance as a function of $\beta$

| $\beta$ | Training |    |    | Out of sample |    |    |
|---------|----------|----|----|---------------|----|----|
|         | tp       | fp | fn | tp            | fp | fn |
| 1.00    | 0        | 0  | 1  | 0             | 0  | 5  |
| 0.99    | 0        | 0  | 1  | 0             | 0  | 5  |
| 0.96    | 0        | 0  | 1  | 2             | 0  | 3  |
| 0.91    | 0        | 0  | 1  | 2             | 2  | 3  |
| 0.76    | 1        | 0  | 0  | 5             | 11 | 0  |
| 0.46    | 1        | 2  | 0  | 5             | 28 | 0  |
| 0.00    | 1        | 4  | 0  | 5             | 53 | 0  |

Model 2

- (GT) covid
- (GT) covid-19
- (GT) chest pain
- (GT) covid symptoms
- (GT) chest tightness
- (GT) quarantine

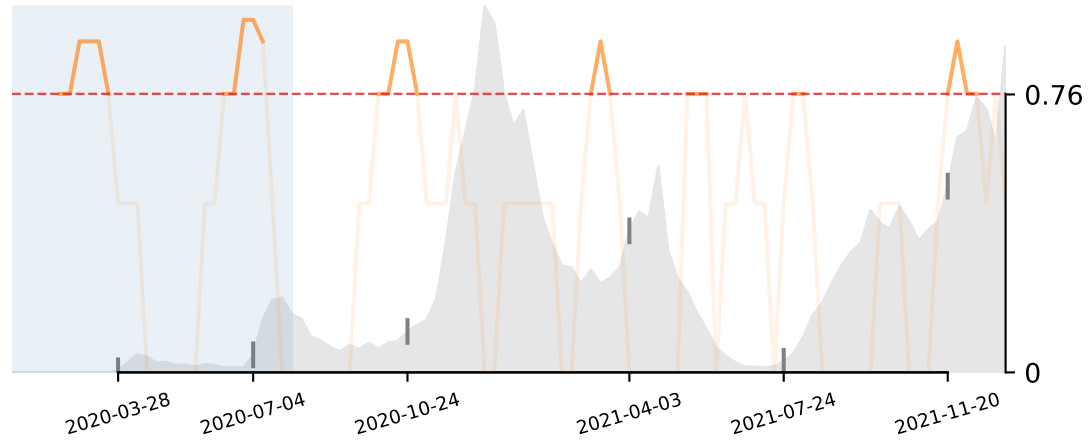

| $\beta$ | Training |    |    | Out of sample |    |    |
|---------|----------|----|----|---------------|----|----|
|         | tp       | fp | fn | tp            | fp | fn |
| 1.00    | 0        | 0  | 2  | 0             | 0  | 4  |
| 0.99    | 0        | 0  | 2  | 0             | 0  | 4  |
| 0.96    | 0        | 0  | 2  | 0             | 0  | 4  |
| 0.91    | 1        | 0  | 1  | 2             | 1  | 1  |
| 0.76    | 2        | 1  | 0  | 4             | 11 | 0  |
| 0.46    | 2        | 3  | 0  | 4             | 26 | 0  |
| 0.00    | 2        | 7  | 0  | 4             | 46 | 0  |

Model 3

- (GT) covid-19
- (GT) covid symptoms
- (GT) chest tightness
- (GT) quarantine
- (GT) Anosmia
- (GT) Burning Chest Pain

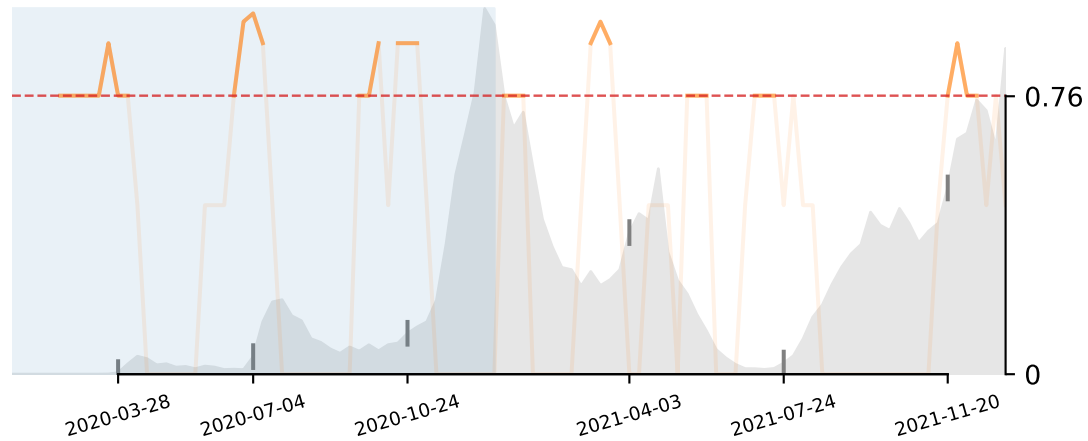

| $\beta$ | Training |    |    | Out of sample |    |    |
|---------|----------|----|----|---------------|----|----|
|         | tp       | fp | fn | tp            | fp | fn |
| 1.00    | 0        | 0  | 3  | 0             | 0  | 3  |
| 0.99    | 0        | 0  | 3  | 0             | 0  | 3  |
| 0.96    | 1        | 0  | 2  | 1             | 0  | 2  |
| 0.91    | 1        | 0  | 2  | 1             | 1  | 1  |
| 0.76    | 3        | 2  | 0  | 3             | 11 | 0  |
| 0.46    | 3        | 6  | 0  | 3             | 18 | 0  |
| 0.00    | 3        | 10 | 0  | 3             | 32 | 0  |

## Proxies selected by the Multiple Sources method

Model 1

- (GT) covid
- (GT) how long does covid last
- (GT) covid-19
- (GT) covid symptoms
- (GT) covid-19 who
- (GT) sars-cov-2

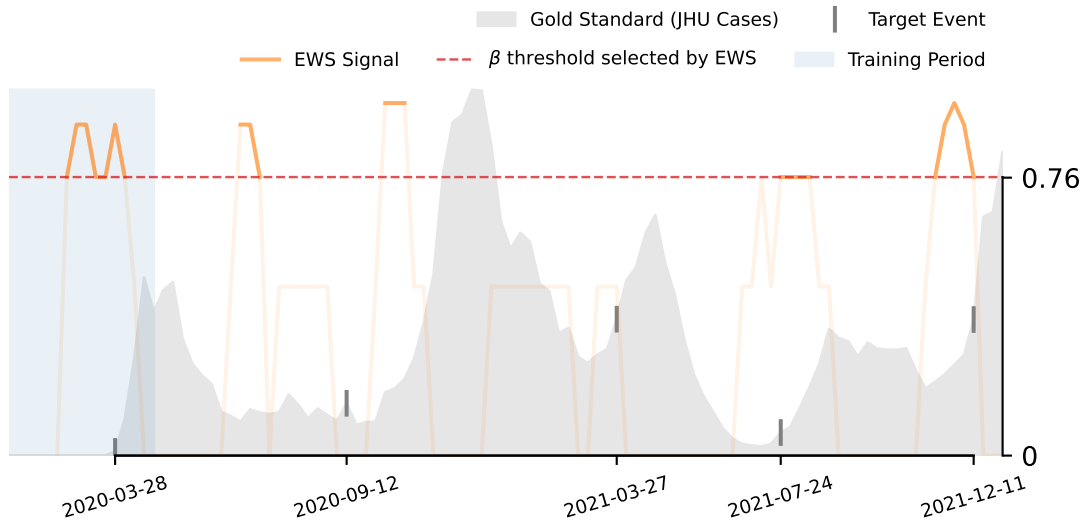

Model 2

- (GT) sars-cov-2
- (GT) Burning Chest Pain
- (GT) Ageusia

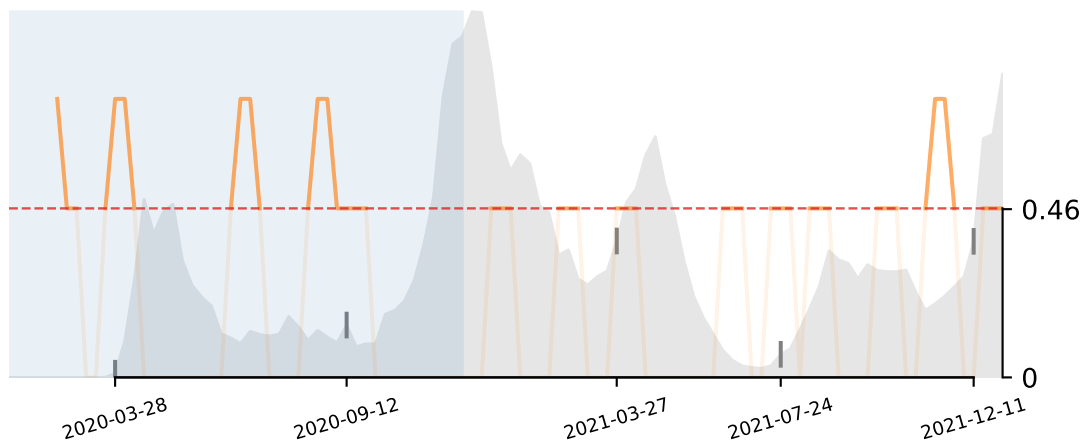

Model 3

- (GT) Burning Chest Pain
- (GT) Ageusia
- (GT) sars-cov-2
- (GT) Nasal congestion
- (GT) covid symptoms
- (GT) nose bleed

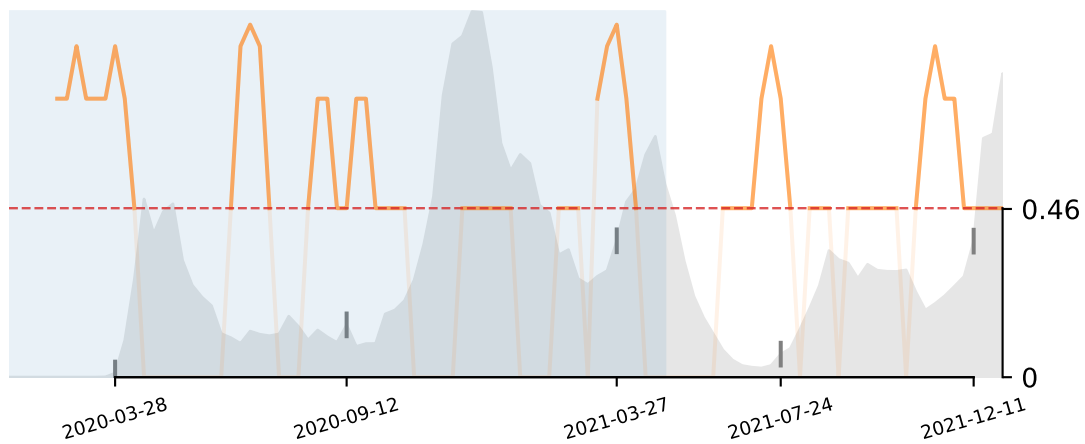

## Performance as a function of $\beta$

| $\beta$ | Training |    |    | Out of sample |    |    |
|---------|----------|----|----|---------------|----|----|
|         | tp       | fp | fn | tp            | fp | fn |
| 1.00    | 0        | 0  | 1  | 0             | 0  | 4  |
| 0.99    | 0        | 0  | 1  | 0             | 0  | 4  |
| 0.96    | 0        | 0  | 1  | 1             | 3  | 3  |
| 0.91    | 0        | 0  | 1  | 1             | 5  | 3  |
| 0.76    | 1        | 0  | 0  | 2             | 9  | 2  |
| 0.46    | 1        | 2  | 0  | 4             | 23 | 0  |
| 0.00    | 1        | 3  | 0  | 4             | 60 | 0  |

| $\beta$ | tp fp fn |    |   | tp fp fn |    |   |
|---------|----------|----|---|----------|----|---|
|         | 0.91     | 0  | 0 | 2        | 0  | 0 |
| 0.76    | 0        | 0  | 2 | 1        | 0  | 2 |
| 0.46    | 2        | 4  | 0 | 3        | 15 | 0 |
| 0.00    | 2        | 10 | 0 | 3        | 35 | 0 |

| $\beta$ | tp fp fn |    |   | tp fp fn |    |   |
|---------|----------|----|---|----------|----|---|
|         | 1.00     | 0  | 0 | 3        | 0  | 0 |
| 0.99    | 0        | 0  | 3 | 0        | 0  | 2 |
| 0.96    | 0        | 0  | 3 | 0        | 0  | 2 |
| 0.91    | 1        | 1  | 2 | 2        | 0  | 0 |
| 0.76    | 2        | 3  | 1 | 2        | 0  | 0 |
| 0.46    | 3        | 9  | 0 | 2        | 13 | 0 |
| 0.00    | 3        | 25 | 0 | 2        | 21 | 0 |

## Proxies selected by the Multiple Sources method

Model 1

- (GT) covid
- (GT) covid-19
- (GT) covid symptoms
- (GT) quarantine
- (GT) covid-19 who
- (GT) fever

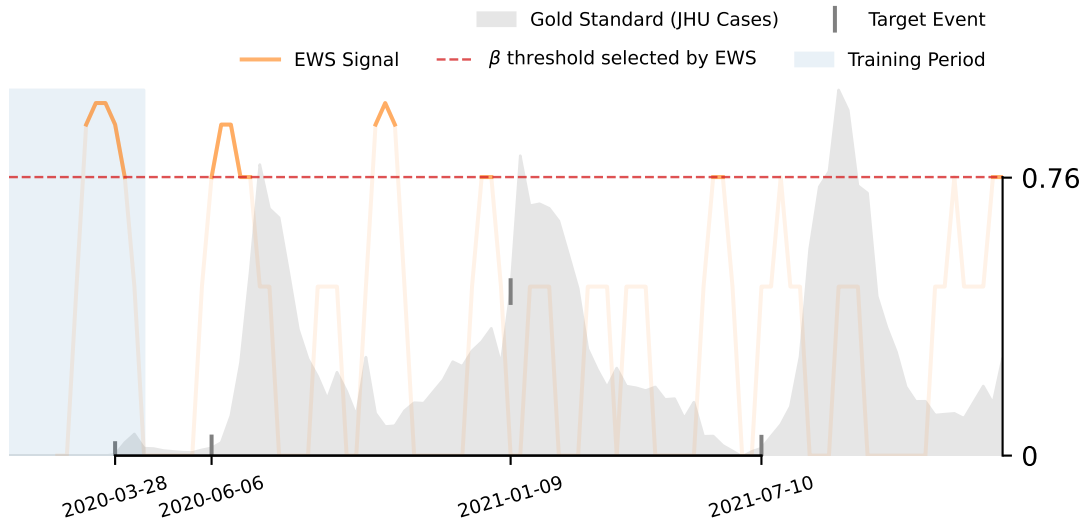

Model 2

- (GT) covid symptoms
- (GT) fever
- Apple Mobility (transit)

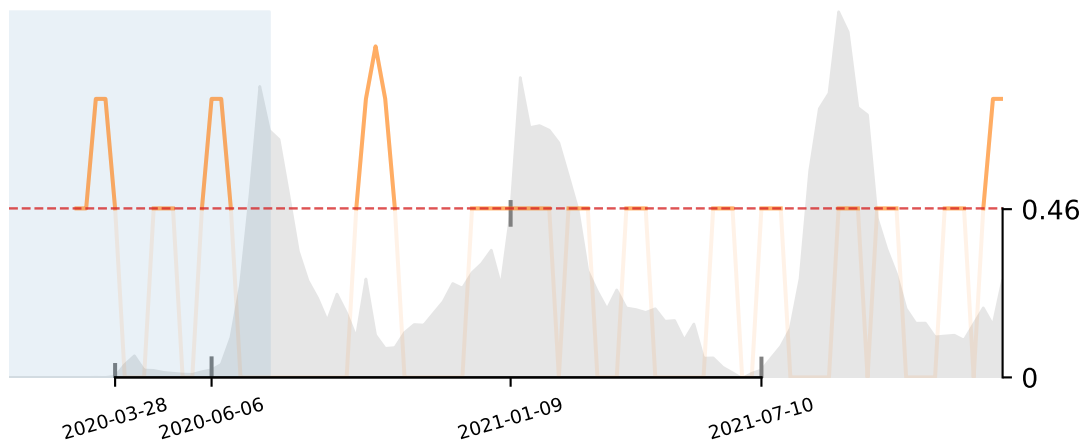

Model 3

- (GT) covid symptoms
- Apple Mobility (transit)
- (GT) Chronic pain
- (GT) Diarrhea
- (GT) Fatigue
- Apple Mobility (driving)

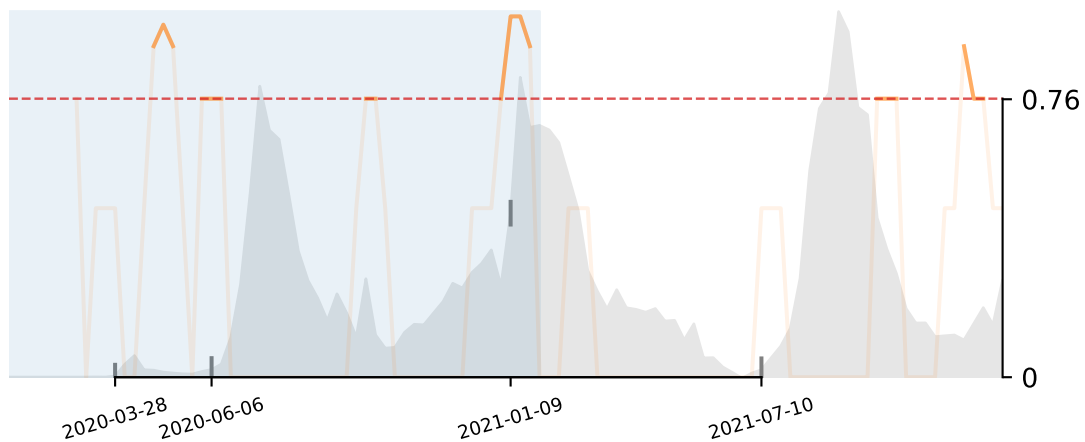

## Performance as a function of $\beta$

| $\beta$ | Training |    |    | Out of sample |    |    |
|---------|----------|----|----|---------------|----|----|
|         | tp       | fp | fn | tp            | fp | fn |
| 1.00    | 0        | 0  | 1  | 0             | 0  | 3  |
| 0.99    | 0        | 0  | 1  | 0             | 0  | 3  |
| 0.96    | 0        | 0  | 1  | 0             | 1  | 3  |
| 0.91    | 1        | 0  | 0  | 0             | 5  | 2  |
| 0.76    | 1        | 0  | 0  | 3             | 11 | 0  |
| 0.46    | 1        | 1  | 0  | 3             | 38 | 0  |
| 0.00    | 1        | 2  | 0  | 3             | 68 | 0  |

| $\beta$ | tp fp fn |   |   | tp fp fn |    |   |
|---------|----------|---|---|----------|----|---|
|         | 0.91     | 0 | 0 | 2        | 0  | 1 |
| 0.76    | 0        | 0 | 2 | 0        | 5  | 2 |
| 0.46    | 2        | 1 | 0 | 2        | 29 | 0 |
| 0.00    | 2        | 4 | 0 | 2        | 62 | 0 |

| $\beta$ | tp fp fn |    |   | tp fp fn |    |   |
|---------|----------|----|---|----------|----|---|
|         | 1.00     | 0  | 0 | 3        | 0  | 0 |
| 0.99    | 0        | 0  | 3 | 0        | 0  | 1 |
| 0.96    | 1        | 1  | 2 | 0        | 0  | 1 |
| 0.91    | 1        | 2  | 2 | 0        | 1  | 1 |
| 0.76    | 2        | 4  | 1 | 0        | 6  | 1 |
| 0.46    | 3        | 7  | 0 | 1        | 15 | 0 |
| 0.00    | 3        | 10 | 0 | 1        | 41 | 0 |

## Proxies selected by the Multiple Sources method

Model 1

- (GT) covid
- (GT) covid-19
- (GT) covid symptoms
- (GT) quarantine
- up2date
- (GT) Chest pain

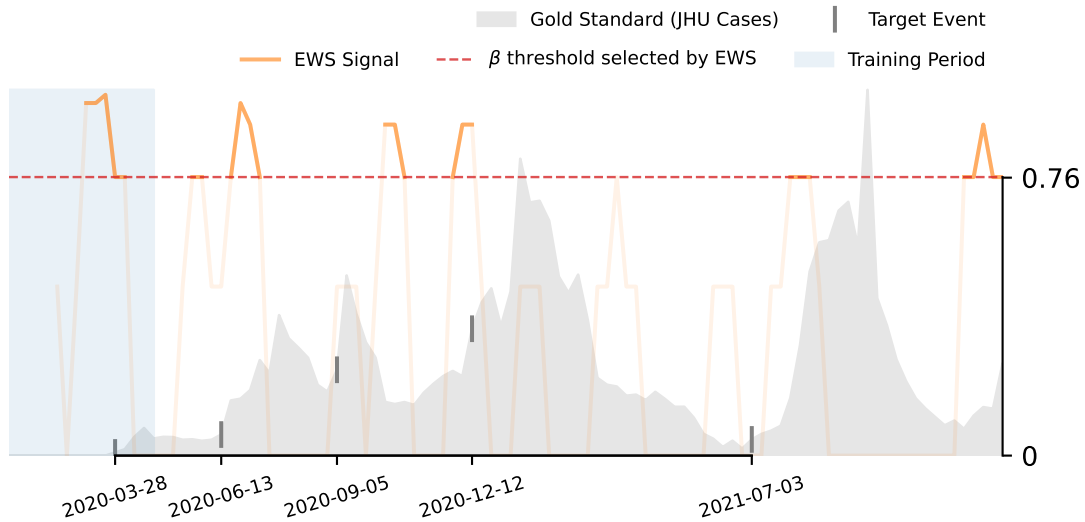

Model 2

- (GT) covid
- (GT) covid symptoms
- (GT) Chest pain
- (GT) Chronic pain

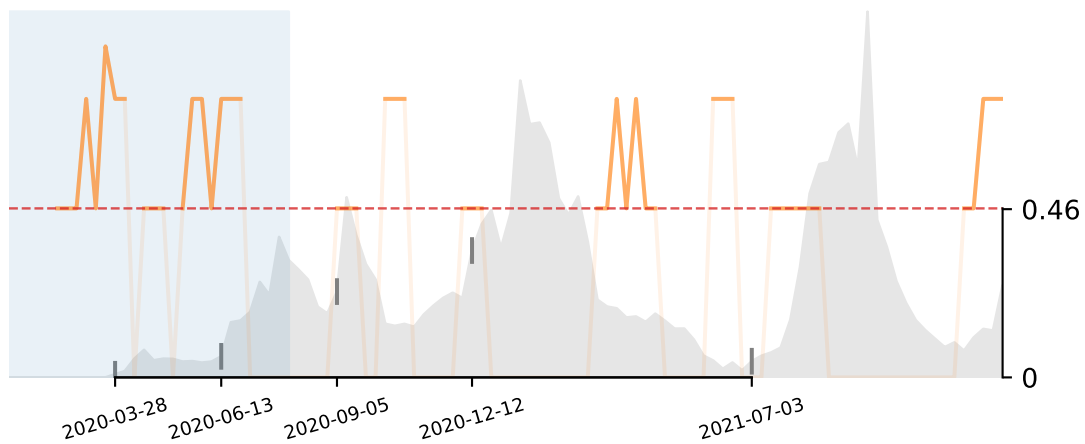

Model 3

- (GT) Chest pain
- (GT) covid
- (GT) covid symptoms
- (GT) Chills
- (GT) Chronic pain
- (GT) Fatigue

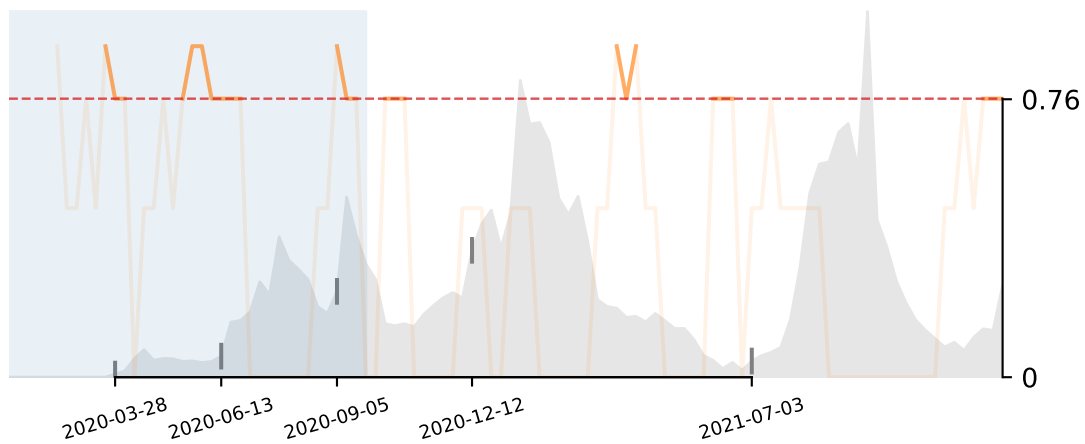

## Performance as a function of $\beta$

| $\beta$ | Training |    |    | Out of sample |    |    |
|---------|----------|----|----|---------------|----|----|
|         | tp       | fp | fn | tp            | fp | fn |
| 1.00    | 0        | 0  | 1  | 0             | 0  | 4  |
| 0.99    | 0        | 0  | 1  | 0             | 0  | 4  |
| 0.96    | 1        | 0  | 0  | 0             | 1  | 3  |
| 0.91    | 1        | 0  | 0  | 1             | 5  | 2  |
| 0.76    | 1        | 0  | 0  | 2             | 16 | 2  |
| 0.46    | 1        | 1  | 0  | 4             | 30 | 0  |
| 0.00    | 1        | 2  | 0  | 4             | 60 | 0  |

| $\beta$ | tp fp fn |   |   | tp fp fn |    |   |
|---------|----------|---|---|----------|----|---|
|         | 0.96     | 0 | 0 | 2        | 0  | 0 |
| 0.91    | 0        | 0 | 2 | 0        | 0  | 3 |
| 0.76    | 1        | 0 | 1 | 1        | 8  | 2 |
| 0.46    | 2        | 3 | 0 | 3        | 24 | 0 |
| 0.00    | 2        | 8 | 0 | 3        | 55 | 0 |

| $\beta$ | tp fp fn |    |   | tp fp fn |    |   |
|---------|----------|----|---|----------|----|---|
|         | 1.00     | 0  | 0 | 3        | 0  | 0 |
| 0.99    | 0        | 0  | 3 | 0        | 0  | 2 |
| 0.96    | 0        | 0  | 3 | 0        | 0  | 2 |
| 0.91    | 0        | 0  | 3 | 0        | 2  | 2 |
| 0.76    | 3        | 1  | 0 | 1        | 11 | 1 |
| 0.46    | 3        | 7  | 0 | 2        | 28 | 0 |
| 0.00    | 3        | 11 | 0 | 2        | 52 | 0 |

## Proxies selected by the Multiple Sources method

Model 1

- (GT) covid
- (GT) covid-19
- (GT) covid symptoms
- (GT) covid-19 who
- (GT) fever
- (GT) Diarrhea

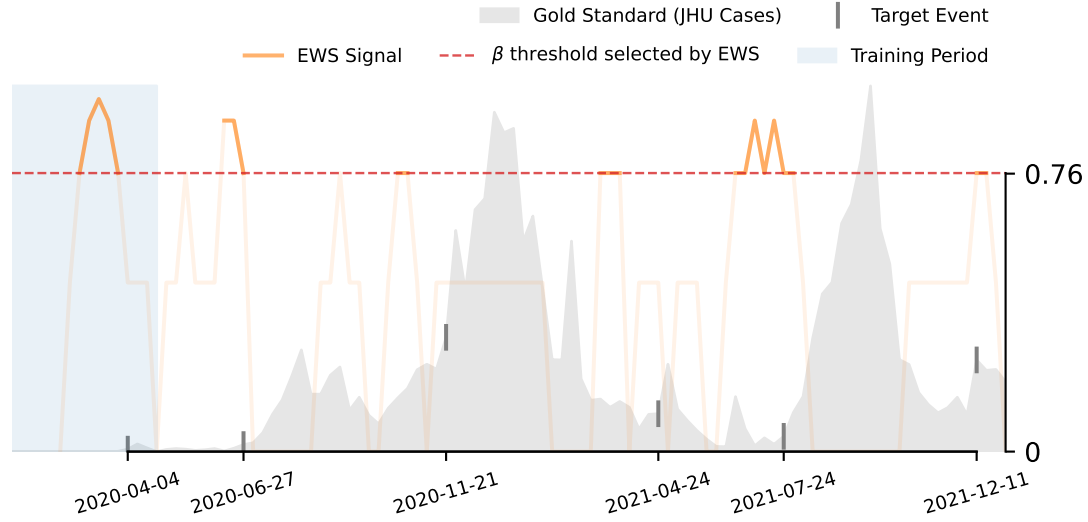

Model 2

- (GT) covid
- (GT) covid-19
- (GT) covid symptoms
- (GT) fever

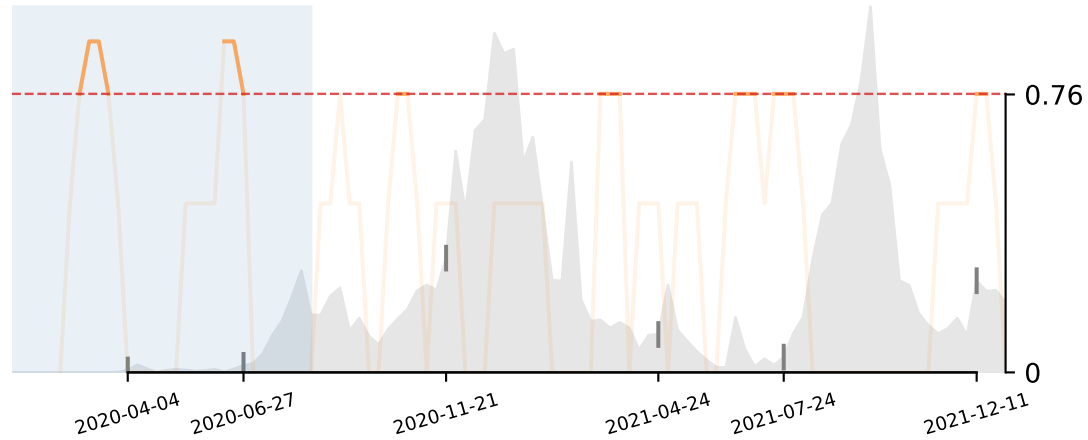

Model 3

- (GT) covid
- (GT) covid symptoms
- (GT) fever
- (GT) covid-19
- (GT) Abdominal pain
- (GT) Fever

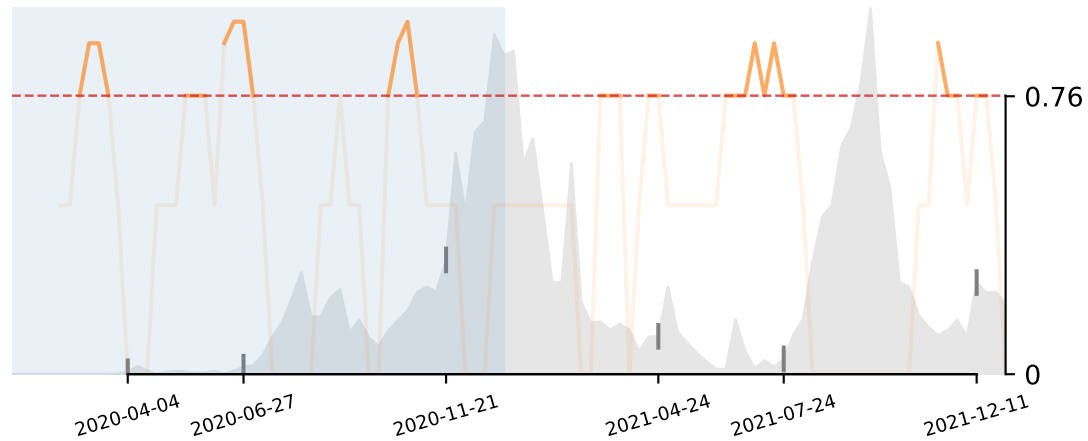

## Performance as a function of $\beta$

| $\beta$ | Training |    |    | Out of sample |    |    |
|---------|----------|----|----|---------------|----|----|
|         | tp       | fp | fn | tp            | fp | fn |
| 1.00    | 0        | 0  | 1  | 0             | 0  | 5  |
| 0.99    | 0        | 0  | 1  | 0             | 0  | 5  |
| 0.96    | 0        | 0  | 1  | 0             | 0  | 5  |
| 0.91    | 1        | 0  | 0  | 2             | 0  | 3  |
| 0.76    | 1        | 0  | 0  | 5             | 3  | 0  |
| 0.46    | 1        | 1  | 0  | 5             | 25 | 0  |
| 0.00    | 1        | 4  | 0  | 5             | 53 | 0  |

| $\beta$ | tp | fp | fn | tp | fp | fn |
|---------|----|----|----|----|----|----|
| 0.96    | 0  | 0  | 2  | 0  | 0  | 4  |
| 0.91    | 0  | 0  | 2  | 0  | 0  | 4  |
| 0.76    | 2  | 0  | 0  | 4  | 3  | 0  |
| 0.46    | 2  | 1  | 0  | 4  | 19 | 0  |
| 0.00    | 2  | 4  | 0  | 4  | 44 | 0  |

| $\beta$ | tp | fp | fn | tp | fp | fn |
|---------|----|----|----|----|----|----|
| 1.00    | 0  | 0  | 3  | 0  | 0  | 3  |
| 0.99    | 0  | 0  | 3  | 0  | 0  | 3  |
| 0.96    | 0  | 0  | 3  | 0  | 0  | 3  |
| 0.91    | 2  | 0  | 1  | 2  | 0  | 1  |
| 0.76    | 3  | 1  | 0  | 3  | 2  | 0  |
| 0.46    | 3  | 7  | 0  | 3  | 17 | 0  |
| 0.00    | 3  | 20 | 0  | 3  | 31 | 0  |

## Proxies selected by the Multiple Sources method

Model 1

- (GT) covid
- (GT) covid-19
- (GT) covid symptoms
- (GT) Acute bronchitis
- (GT) Bronchitis
- (GT) Chest pain

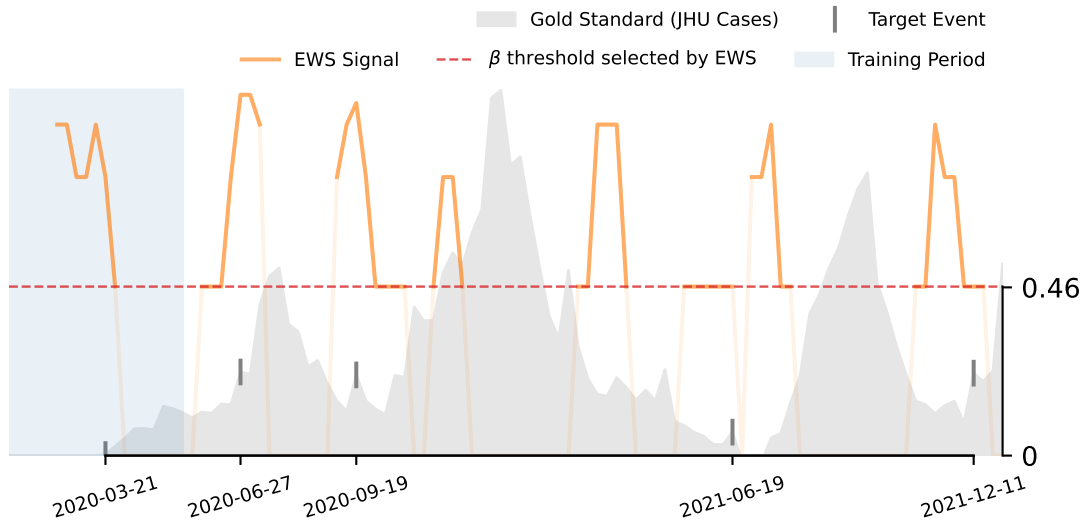

## Performance as a function of $\beta$

| $\beta$ | Training |    |    | Out of sample |    |    |
|---------|----------|----|----|---------------|----|----|
|         | tp       | fp | fn | tp            | fp | fn |
| 1.00    | 0        | 0  | 1  | 0             | 0  | 4  |
| 0.99    | 0        | 0  | 1  | 1             | 1  | 3  |
| 0.96    | 0        | 0  | 1  | 2             | 1  | 2  |
| 0.91    | 0        | 0  | 1  | 3             | 6  | 1  |
| 0.76    | 1        | 1  | 0  | 3             | 11 | 0  |
| 0.46    | 1        | 1  | 0  | 4             | 23 | 0  |
| 0.00    | 1        | 2  | 0  | 4             | 58 | 0  |

Model 2

- (GT) covid
- (GT) covid-19
- (GT) covid symptoms
- (GT) chest tightness
- (GT) Acute bronchitis
- (GT) Bronchitis

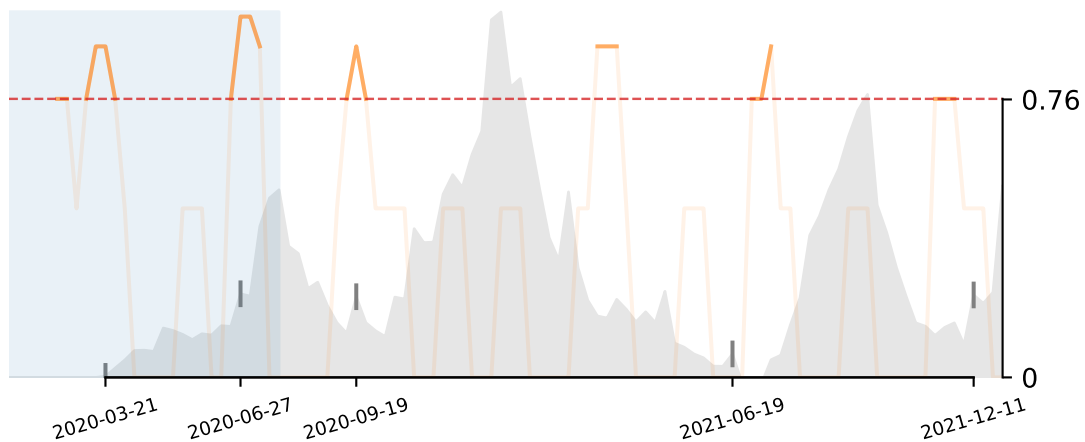

| $\beta$ | tp fp fn |   |   | tp fp fn |    |   |
|---------|----------|---|---|----------|----|---|
|         | 1.00     | 0 | 0 | 2        | 0  | 0 |
| 0.99    | 0        | 0 | 2 | 0        | 0  | 3 |
| 0.96    | 1        | 1 | 1 | 0        | 0  | 3 |
| 0.91    | 1        | 1 | 1 | 1        | 4  | 2 |
| 0.76    | 2        | 2 | 0 | 2        | 7  | 0 |
| 0.46    | 2        | 4 | 0 | 3        | 26 | 0 |
| 0.00    | 2        | 7 | 0 | 3        | 54 | 0 |

Model 3

- (GT) covid symptoms
- (GT) Acute bronchitis
- (GT) Bronchitis
- (GT) Cough
- (GT) Nasal congestion
- (GT) Pneumonia

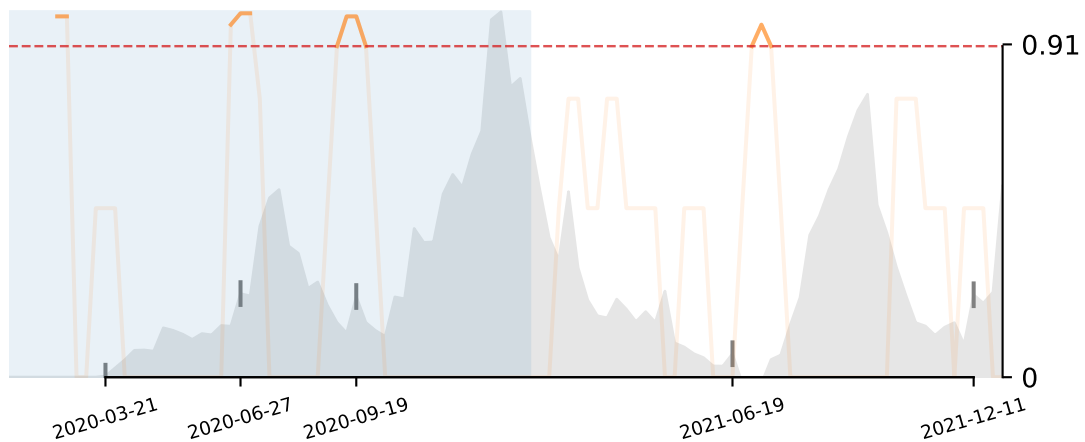

| $\beta$ | tp fp fn |   |   | tp fp fn |    |   |
|---------|----------|---|---|----------|----|---|
|         | 1.00     | 0 | 0 | 3        | 0  | 0 |
| 0.99    | 1        | 1 | 2 | 0        | 0  | 2 |
| 0.96    | 3        | 2 | 0 | 0        | 1  | 2 |
| 0.91    | 3        | 2 | 0 | 0        | 3  | 1 |
| 0.76    | 3        | 3 | 0 | 1        | 9  | 0 |
| 0.46    | 3        | 4 | 0 | 2        | 19 | 0 |
| 0.00    | 3        | 6 | 0 | 2        | 35 | 0 |

## Proxies selected by the Multiple Sources method

Model 1

- (GT) covid
- (GT) covid-19
- (GT) covid symptoms
- (GT) covid-19 who
- (GT) fever
- (GT) Chills

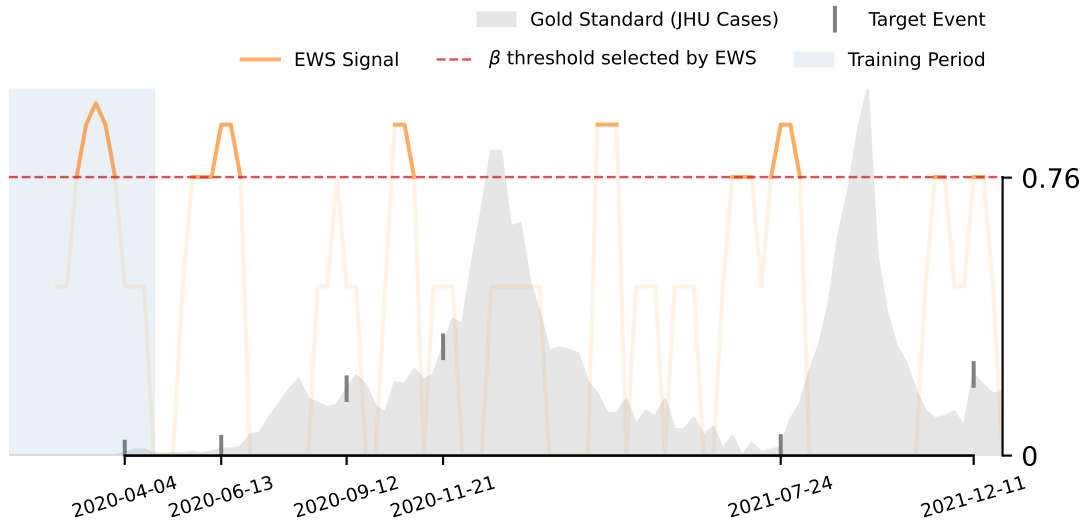

## Performance as a function of $\beta$

| $\beta$ | Training |    |    | Out of sample |    |    |
|---------|----------|----|----|---------------|----|----|
|         | tp       | fp | fn | tp            | fp | fn |
| 1.00    | 0        | 0  | 1  | 0             | 0  | 5  |
| 0.99    | 0        | 0  | 1  | 0             | 0  | 5  |
| 0.96    | 0        | 0  | 1  | 0             | 0  | 5  |
| 0.91    | 1        | 0  | 0  | 3             | 5  | 2  |
| 0.76    | 1        | 0  | 0  | 5             | 8  | 0  |
| 0.46    | 1        | 1  | 0  | 5             | 23 | 0  |
| 0.00    | 1        | 5  | 0  | 5             | 53 | 0  |

Model 2

- (GT) covid
- (GT) covid-19
- (GT) covid symptoms
- (GT) fever
- (GT) Chills

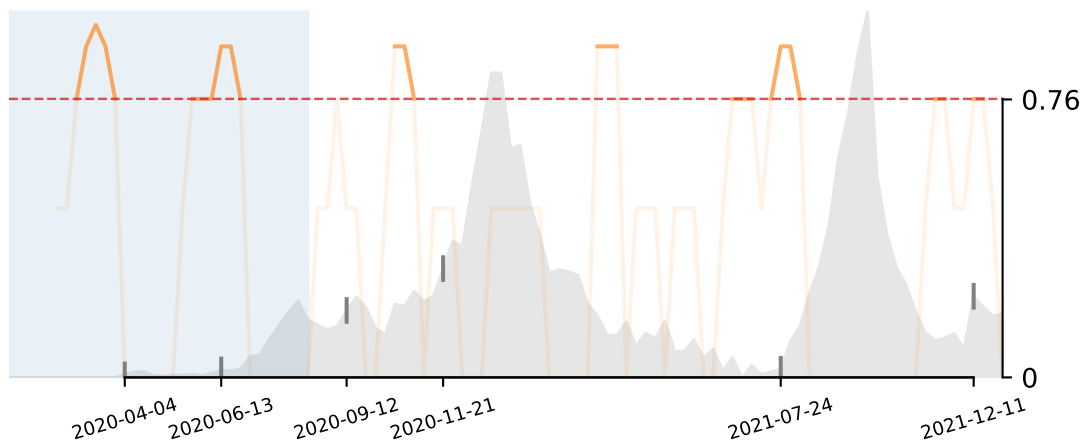

| $\beta$ | tp | fp | fn | tp | fp | fn |
|---------|----|----|----|----|----|----|
| 0.99    | 0  | 0  | 2  | 0  | 0  | 4  |
| 0.96    | 0  | 0  | 2  | 0  | 0  | 4  |
| 0.91    | 1  | 0  | 1  | 2  | 4  | 2  |
| 0.76    | 2  | 1  | 0  | 4  | 6  | 0  |
| 0.46    | 2  | 3  | 0  | 4  | 21 | 0  |
| 0.00    | 2  | 5  | 0  | 4  | 47 | 0  |

Model 3

- (GT) covid symptoms
- (GT) fever
- (GT) covid-19
- (GT) Diarrhea
- (GT) covid
- (GT) chest pain

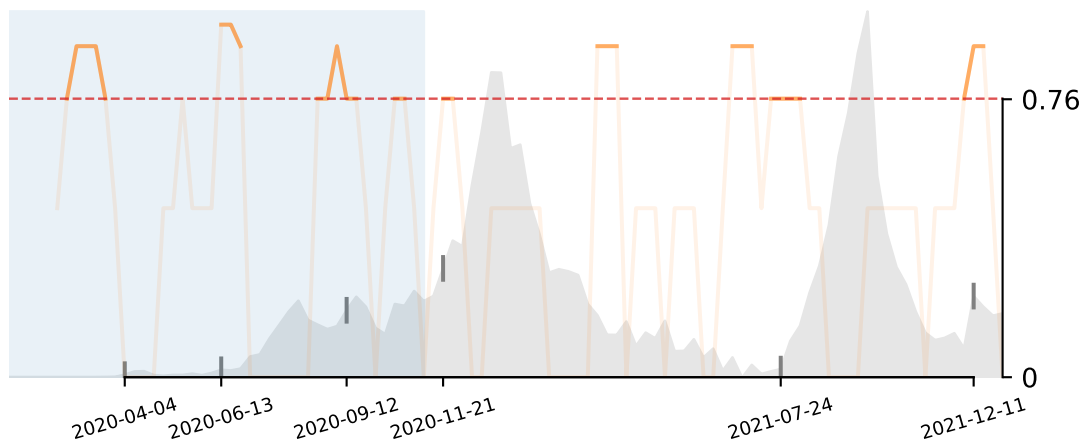

| $\beta$ | tp | fp | fn | tp | fp | fn |
|---------|----|----|----|----|----|----|
| 1.00    | 0  | 0  | 3  | 0  | 0  | 3  |
| 0.99    | 0  | 0  | 3  | 0  | 0  | 3  |
| 0.96    | 0  | 0  | 3  | 0  | 0  | 3  |
| 0.91    | 1  | 1  | 2  | 2  | 4  | 1  |
| 0.76    | 3  | 3  | 0  | 3  | 7  | 0  |
| 0.46    | 3  | 7  | 0  | 3  | 28 | 0  |
| 0.00    | 3  | 13 | 0  | 3  | 44 | 0  |

## Proxies selected by the Multiple Sources method

Model 1

- (GT) covid
- (GT) covid symptoms
- (GT) Diarrhea
- (GT) Dizziness
- (GT) Fatigue
- (GT) Nasal congestion

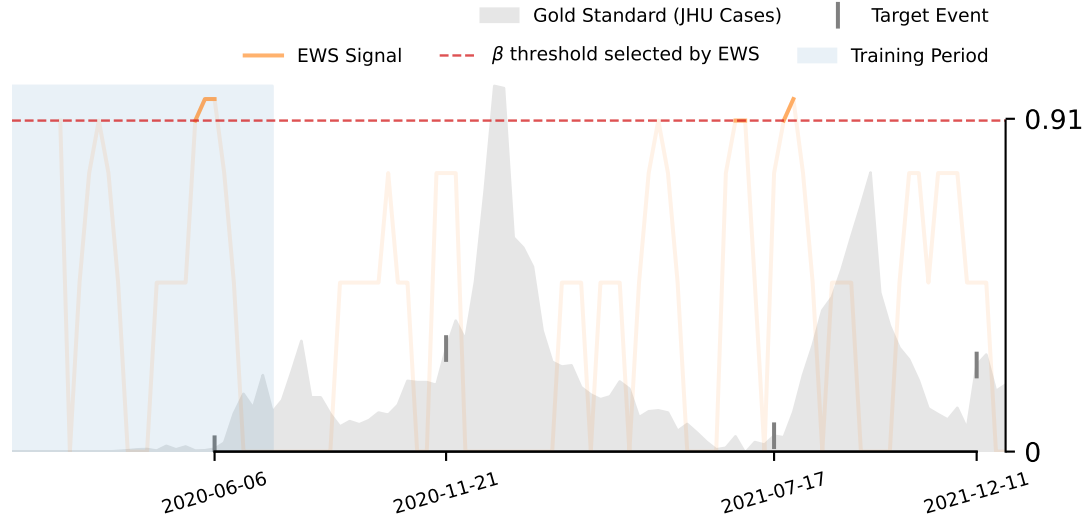

Model 2

- (GT) covid
- (GT) Vomiting
- (GT) covid symptoms
- (GT) Abdominal pain
- (GT) Fatigue

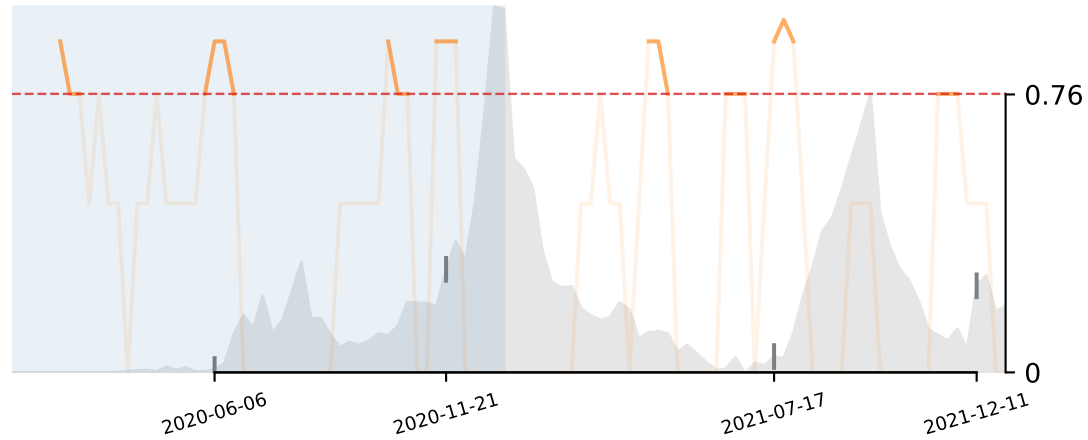

Model 3

- (GT) covid
- (GT) Abdominal pain
- (GT) Fatigue
- (GT) Vomiting
- (GT) covid symptoms
- (GT) Diarrhea

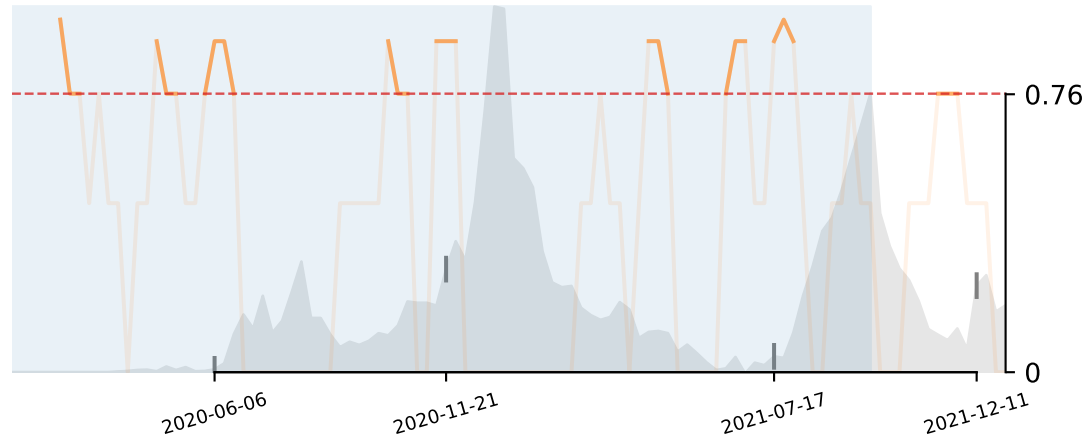

## Performance as a function of $\beta$

| $\beta$ | Training |    |    | Out of sample |    |    |
|---------|----------|----|----|---------------|----|----|
|         | tp       | fp | fn | tp            | fp | fn |
| 1.00    | 0        | 0  | 1  | 0             | 0  | 3  |
| 0.99    | 0        | 0  | 1  | 0             | 0  | 3  |
| 0.96    | 0        | 0  | 1  | 0             | 1  | 2  |
| 0.91    | 1        | 0  | 0  | 1             | 3  | 2  |
| 0.76    | 1        | 2  | 0  | 3             | 8  | 0  |
| 0.46    | 1        | 5  | 0  | 3             | 27 | 0  |
| 0.00    | 1        | 10 | 0  | 3             | 55 | 0  |

| $\beta$ | tp fp fn |    |   | tp fp fn |    |   |
|---------|----------|----|---|----------|----|---|
|         | 0.99     | 0  | 0 | 2        | 0  | 0 |
| 0.96    | 0        | 0  | 2 | 0        | 1  | 1 |
| 0.91    | 0        | 0  | 2 | 1        | 4  | 1 |
| 0.76    | 2        | 4  | 0 | 2        | 6  | 0 |
| 0.46    | 2        | 10 | 0 | 2        | 16 | 0 |
| 0.00    | 2        | 21 | 0 | 2        | 38 | 0 |

| $\beta$ | tp fp fn |    |   | tp fp fn |   |   |
|---------|----------|----|---|----------|---|---|
|         | 1.00     | 0  | 0 | 3        | 0 | 0 |
| 0.99    | 0        | 0  | 3 | 0        | 0 | 1 |
| 0.96    | 0        | 0  | 3 | 0        | 0 | 1 |
| 0.91    | 0        | 2  | 3 | 0        | 0 | 1 |
| 0.76    | 3        | 9  | 0 | 1        | 0 | 0 |
| 0.46    | 3        | 19 | 0 | 1        | 2 | 0 |
| 0.00    | 3        | 39 | 0 | 1        | 7 | 0 |



## Proxies selected by the Multiple Sources method

Model 1

- (GT) covid
- (GT) covid-19
- (GT) chest pain
- (GT) covid symptoms
- (GT) quarantine
- (GT) fever

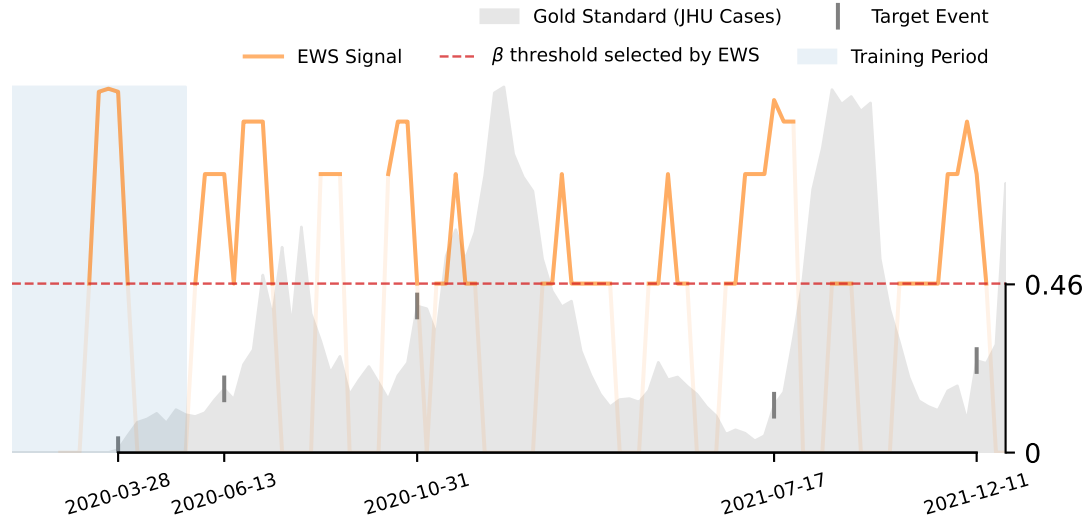

## Performance as a function of $\beta$

| $\beta$ | Training |    |    | Out of sample |    |    |
|---------|----------|----|----|---------------|----|----|
|         | tp       | fp | fn | tp            | fp | fn |
| 1.00    | 0        | 0  | 1  | 0             | 0  | 4  |
| 0.99    | 1        | 0  | 0  | 0             | 0  | 4  |
| 0.96    | 1        | 0  | 0  | 1             | 0  | 3  |
| 0.91    | 1        | 0  | 0  | 3             | 5  | 0  |
| 0.76    | 1        | 0  | 0  | 4             | 11 | 0  |
| 0.46    | 1        | 0  | 0  | 4             | 34 | 0  |
| 0.00    | 1        | 1  | 0  | 4             | 60 | 0  |

Model 2

- (GT) covid-19
- (GT) chest pain
- (GT) fever
- (GT) Ageusia
- (GT) Diarrhea
- (GT) Fatigue

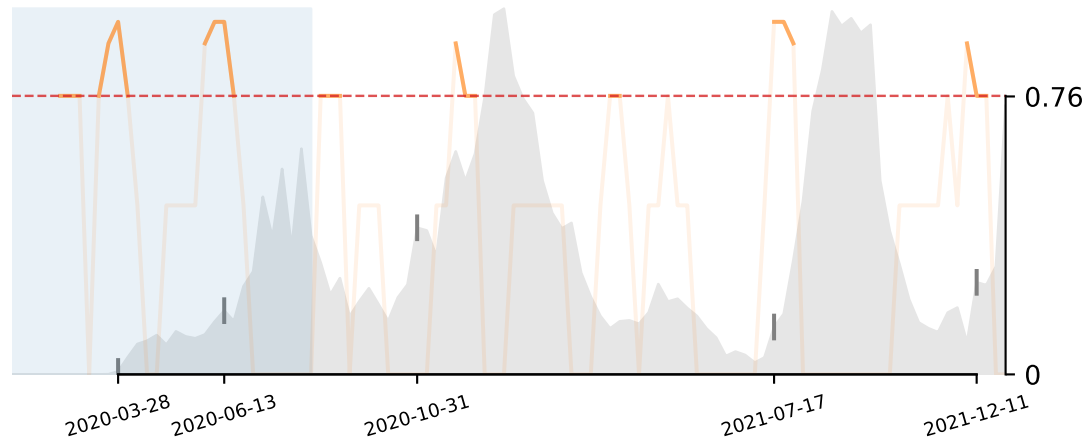

| $\beta$ | tp fp fn |   |   | tp fp fn |    |   |
|---------|----------|---|---|----------|----|---|
|         | 1.00     | 0 | 0 | 2        | 0  | 0 |
| 0.99    | 0        | 0 | 2 | 0        | 0  | 3 |
| 0.96    | 0        | 0 | 2 | 1        | 1  | 2 |
| 0.91    | 2        | 0 | 0 | 2        | 3  | 1 |
| 0.76    | 2        | 0 | 0 | 2        | 12 | 1 |
| 0.46    | 2        | 4 | 0 | 3        | 28 | 0 |
| 0.00    | 2        | 8 | 0 | 3        | 51 | 0 |

Model 3

- (GT) Ageusia
- (GT) Otitis
- (GT) covid
- (GT) covid-19
- (GT) chest pain
- (GT) quarantine

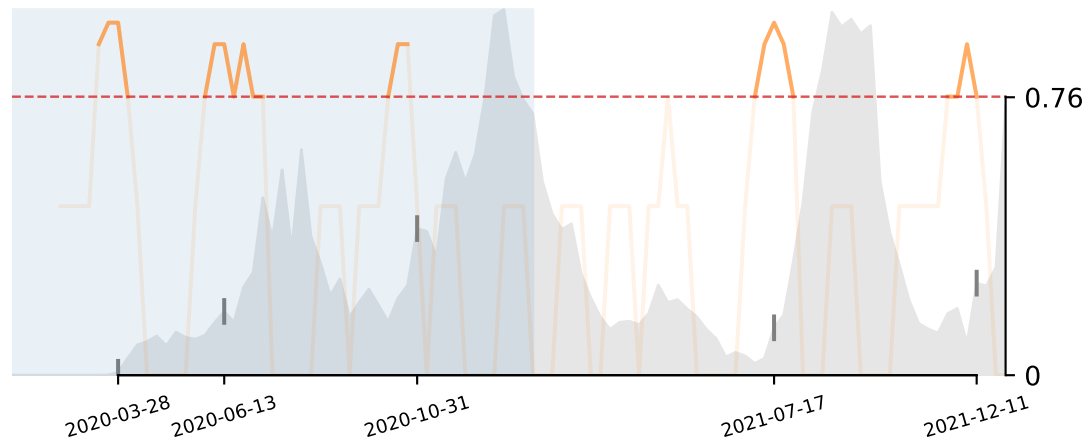

| $\beta$ | tp fp fn |    |   | tp fp fn |    |   |
|---------|----------|----|---|----------|----|---|
|         | 1.00     | 0  | 0 | 3        | 0  | 0 |
| 0.99    | 0        | 0  | 3 | 0        | 0  | 2 |
| 0.96    | 0        | 0  | 3 | 1        | 0  | 1 |
| 0.91    | 1        | 0  | 2 | 2        | 1  | 0 |
| 0.76    | 3        | 1  | 0 | 2        | 3  | 0 |
| 0.46    | 3        | 5  | 0 | 2        | 19 | 0 |
| 0.00    | 3        | 19 | 0 | 2        | 35 | 0 |

## Proxies selected by the Multiple Sources method

Model 1

- (GT) covid
- (GT) covid-19
- (GT) chest pain
- (GT) covid symptoms
- (GT) quarantine
- (GT) fever

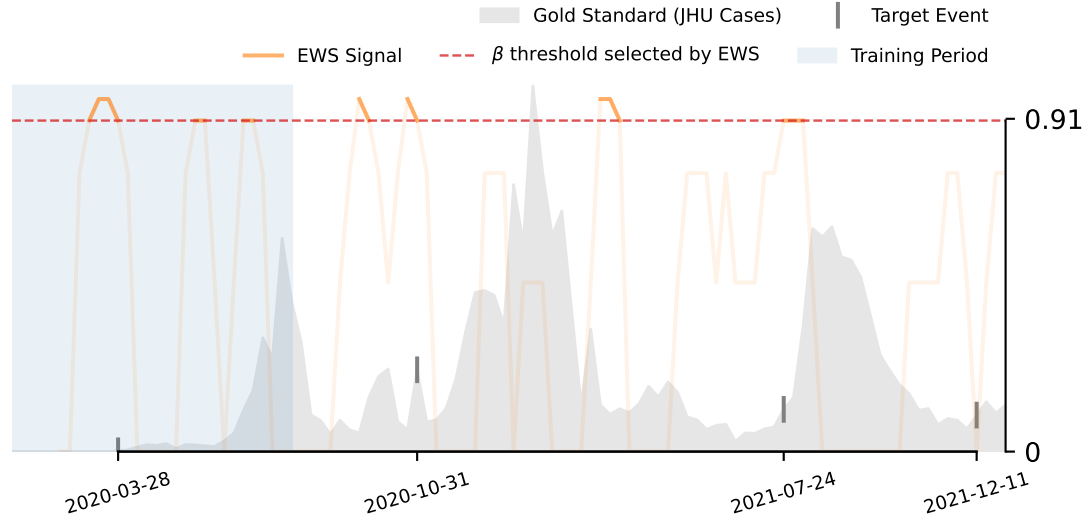

Model 2

- (GT) covid
- (GT) covid symptoms
- (GT) Ageusia
- (GT) Anosmia
- (GT) Asphyxia
- (GT) Asthma

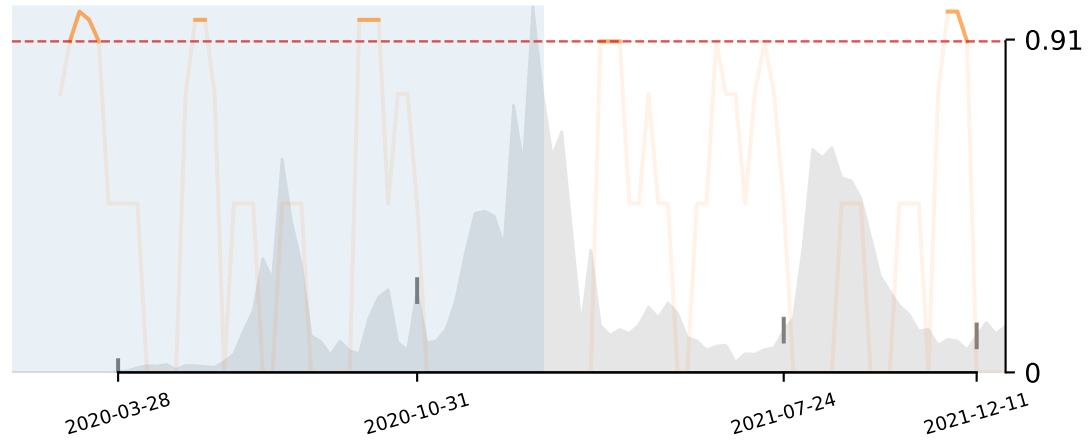

Model 3

- (GT) covid
- (GT) covid symptoms
- (GT) quarantine
- (GT) Asthma
- (GT) covid-19
- (GT) Otitis

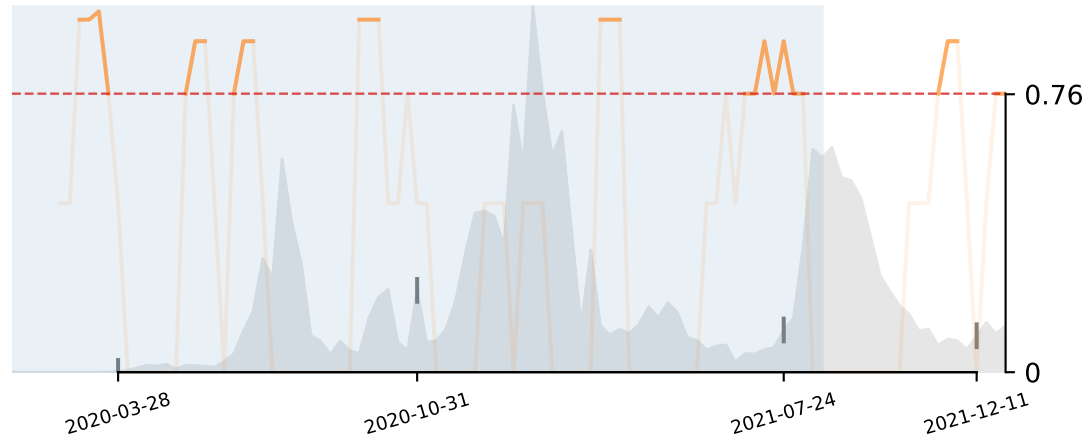

## Performance as a function of $\beta$

| $\beta$ | Training |    |    | Out of sample |    |    |
|---------|----------|----|----|---------------|----|----|
|         | tp       | fp | fn | tp            | fp | fn |
| 1.00    | 0        | 0  | 1  | 0             | 0  | 3  |
| 0.99    | 0        | 0  | 1  | 0             | 0  | 3  |
| 0.96    | 0        | 0  | 1  | 1             | 2  | 2  |
| 0.91    | 1        | 0  | 0  | 2             | 5  | 1  |
| 0.76    | 1        | 4  | 0  | 3             | 15 | 0  |
| 0.46    | 1        | 7  | 0  | 3             | 25 | 0  |
| 0.00    | 1        | 9  | 0  | 3             | 53 | 0  |

| $\beta$ | tp fp fn |    |   | tp fp fn |    |   |
|---------|----------|----|---|----------|----|---|
|         | 1.00     | 0  | 0 | 2        | 0  | 0 |
| 0.99    | 0        | 0  | 2 | 1        | 0  | 1 |
| 0.96    | 1        | 0  | 1 | 1        | 0  | 1 |
| 0.91    | 2        | 4  | 0 | 2        | 4  | 0 |
| 0.76    | 2        | 5  | 0 | 2        | 5  | 0 |
| 0.46    | 2        | 8  | 0 | 2        | 16 | 0 |
| 0.00    | 2        | 16 | 0 | 2        | 34 | 0 |

| $\beta$ | tp fp fn |    |   | tp fp fn |    |   |
|---------|----------|----|---|----------|----|---|
|         | 1.00     | 0  | 0 | 3        | 0  | 0 |
| 0.99    | 0        | 0  | 3 | 0        | 0  | 1 |
| 0.96    | 1        | 0  | 2 | 0        | 0  | 1 |
| 0.91    | 2        | 5  | 1 | 1        | 0  | 0 |
| 0.76    | 3        | 9  | 0 | 1        | 2  | 0 |
| 0.46    | 3        | 14 | 0 | 1        | 4  | 0 |
| 0.00    | 3        | 28 | 0 | 1        | 12 | 0 |

## Proxies selected by the Multiple Sources method

Model 1

- (GT) covid
- (GT) covid-19
- (GT) loss taste
- (GT) chest pain
- (GT) covid symptoms
- (GT) sars-cov-2

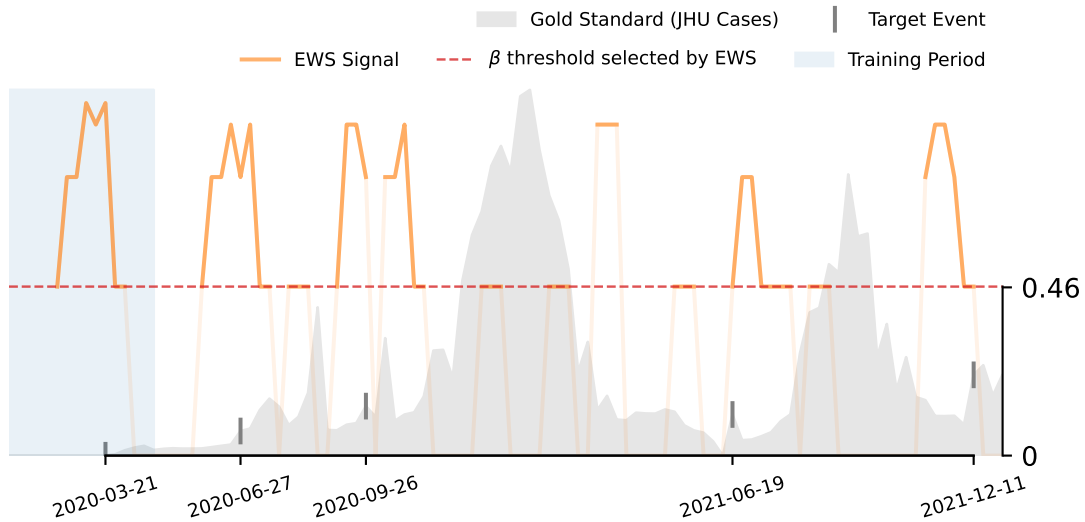

## Performance as a function of $\beta$

| $\beta$ | Training |    |    | Out of sample |    |    |
|---------|----------|----|----|---------------|----|----|
|         | tp       | fp | fn | tp            | fp | fn |
| 1.00    | 0        | 0  | 1  | 0             | 0  | 4  |
| 0.99    | 0        | 0  | 1  | 0             | 0  | 4  |
| 0.96    | 0        | 0  | 1  | 0             | 0  | 4  |
| 0.91    | 1        | 0  | 0  | 3             | 5  | 1  |
| 0.76    | 1        | 0  | 0  | 3             | 9  | 0  |
| 0.46    | 1        | 0  | 0  | 4             | 28 | 0  |
| 0.00    | 1        | 3  | 0  | 4             | 60 | 0  |

Model 2

- (GT) covid
- (GT) covid-19
- (GT) chest pain
- (GT) covid symptoms
- (GT) Acute bronchitis
- (GT) Anosmia

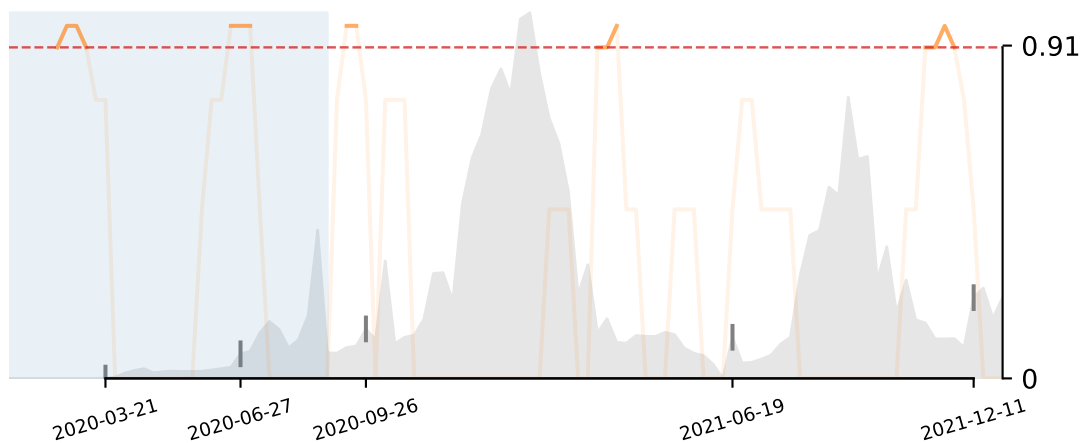

| $\beta$ | tp fp fn |   |   | tp fp fn |    |   |
|---------|----------|---|---|----------|----|---|
|         | 1.00     | 0 | 0 | 2        | 0  | 0 |
| 0.99    | 0        | 0 | 2 | 0        | 0  | 3 |
| 0.96    | 0        | 0 | 2 | 2        | 1  | 1 |
| 0.91    | 2        | 1 | 0 | 2        | 3  | 1 |
| 0.76    | 2        | 2 | 0 | 2        | 8  | 0 |
| 0.46    | 2        | 2 | 0 | 3        | 18 | 0 |
| 0.00    | 2        | 3 | 0 | 3        | 52 | 0 |

Model 3

- (GT) chest pain
- (GT) covid symptoms
- (GT) Acute bronchitis
- (GT) Anosmia
- (GT) Bronchitis
- (GT) Chills

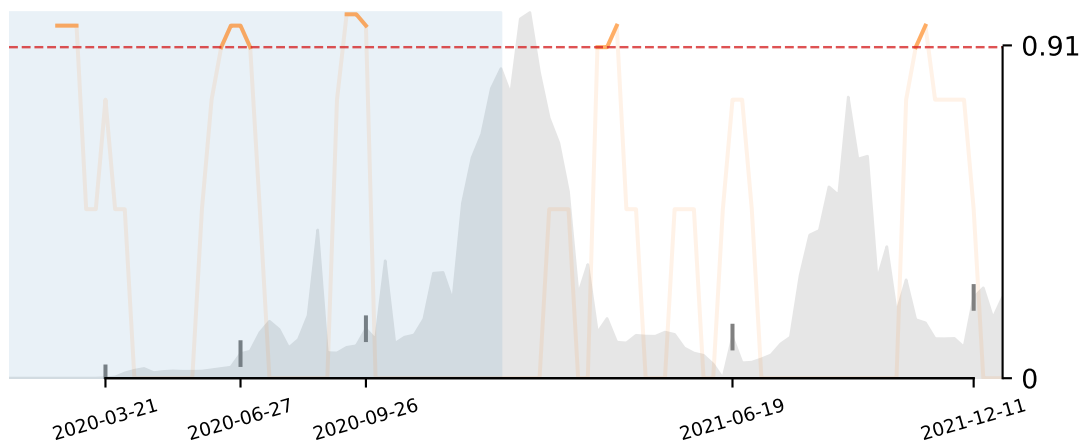

| $\beta$ | tp fp fn |   |   | tp fp fn |    |   |
|---------|----------|---|---|----------|----|---|
|         | 1.00     | 0 | 0 | 3        | 0  | 0 |
| 0.99    | 1        | 0 | 2 | 0        | 0  | 2 |
| 0.96    | 1        | 0 | 2 | 1        | 1  | 1 |
| 0.91    | 3        | 1 | 0 | 1        | 3  | 1 |
| 0.76    | 3        | 2 | 0 | 2        | 5  | 0 |
| 0.46    | 3        | 2 | 0 | 2        | 11 | 0 |
| 0.00    | 3        | 5 | 0 | 2        | 38 | 0 |

## Proxies selected by the Multiple Sources method

Model 1

- (GT) sars-cov-2
- (GT) Hyperventilation
- (GT) covid
- (GT) covid-19
- (GT) loss taste
- (GT) chest pain

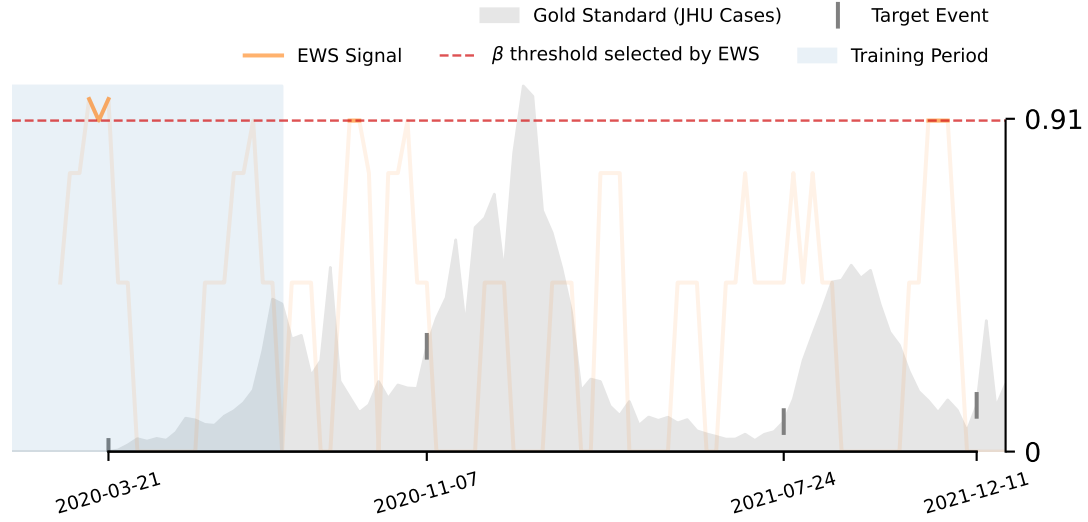

Model 2

- (GT) covid
- (GT) covid-19
- (GT) Viral pneumonia
- (GT) loss taste
- (GT) Burning Chest Pain

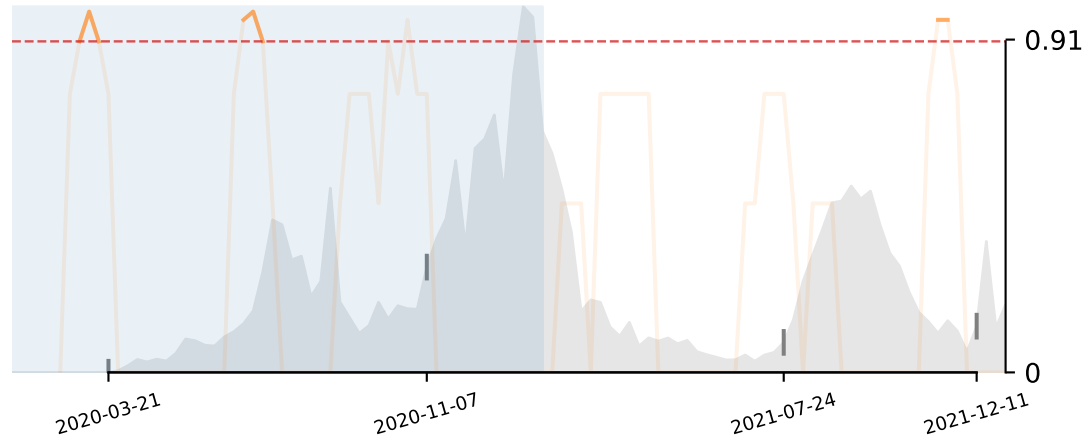

Model 3

- (GT) covid
- (GT) covid-19
- (GT) Burning Chest Pain
- (GT) loss smell
- (GT) loss of smell
- (GT) Hyperventilation

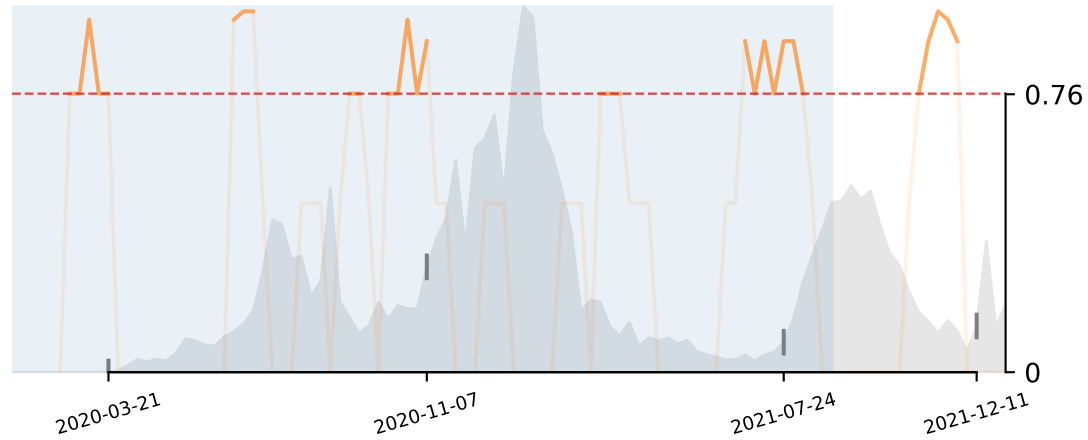

## Performance as a function of $\beta$

| $\beta$ | Training |    |    | Out of sample |    |    |
|---------|----------|----|----|---------------|----|----|
|         | tp       | fp | fn | tp            | fp | fn |
| 1.00    | 0        | 0  | 1  | 0             | 0  | 3  |
| 0.99    | 0        | 0  | 1  | 0             | 0  | 3  |
| 0.96    | 0        | 0  | 1  | 0             | 0  | 3  |
| 0.91    | 1        | 0  | 0  | 2             | 2  | 1  |
| 0.76    | 1        | 1  | 0  | 3             | 7  | 0  |
| 0.46    | 1        | 3  | 0  | 3             | 24 | 0  |
| 0.00    | 1        | 11 | 0  | 3             | 54 | 0  |

| $\beta$ | tp fp fn |    |   | tp fp fn |    |   |
|---------|----------|----|---|----------|----|---|
|         | 0.99     | 0  | 0 | 2        | 0  | 0 |
| 0.96    | 1        | 1  | 1 | 1        | 0  | 1 |
| 0.91    | 2        | 2  | 0 | 1        | 0  | 1 |
| 0.76    | 2        | 3  | 0 | 2        | 6  | 0 |
| 0.46    | 2        | 7  | 0 | 2        | 13 | 0 |
| 0.00    | 2        | 10 | 0 | 2        | 34 | 0 |

| $\beta$ | tp fp fn |    |   | tp fp fn |    |   |
|---------|----------|----|---|----------|----|---|
|         | 1.00     | 0  | 0 | 3        | 0  | 0 |
| 0.99    | 0        | 0  | 3 | 1        | 0  | 0 |
| 0.96    | 0        | 2  | 3 | 1        | 0  | 0 |
| 0.91    | 2        | 3  | 1 | 1        | 0  | 0 |
| 0.76    | 3        | 4  | 0 | 1        | 0  | 0 |
| 0.46    | 3        | 10 | 0 | 1        | 1  | 0 |
| 0.00    | 3        | 30 | 0 | 1        | 11 | 0 |

## Proxies selected by the Multiple Sources method

Model 1

- (GT) covid
- (GT) covid-19
- (GT) chest pain
- (GT) covid symptoms
- (GT) quarantine
- (GT) fever

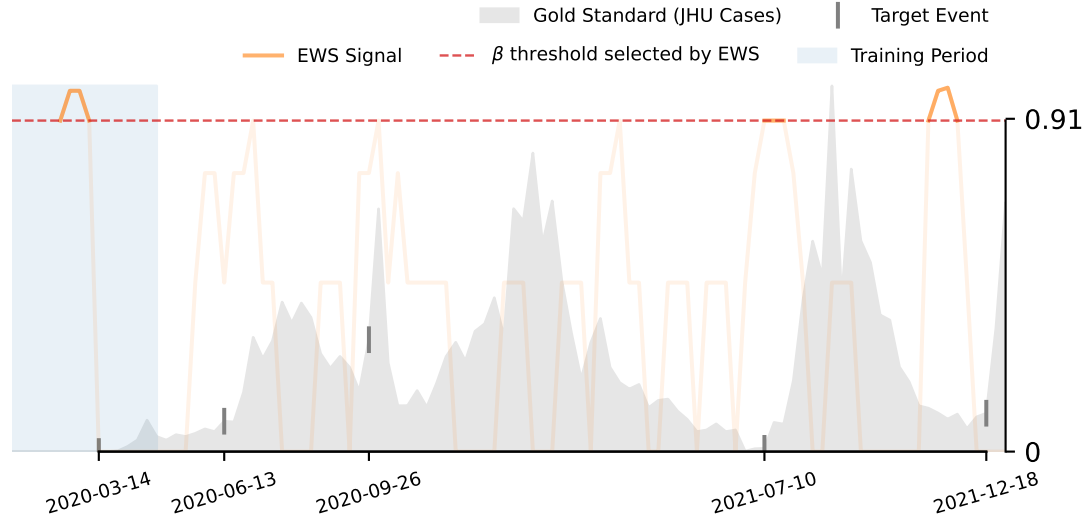

Model 2

- (GT) covid symptoms
- (GT) fever
- (GT) Ageusia
- (GT) Anosmia
- (GT) Chills
- (GT) Cough

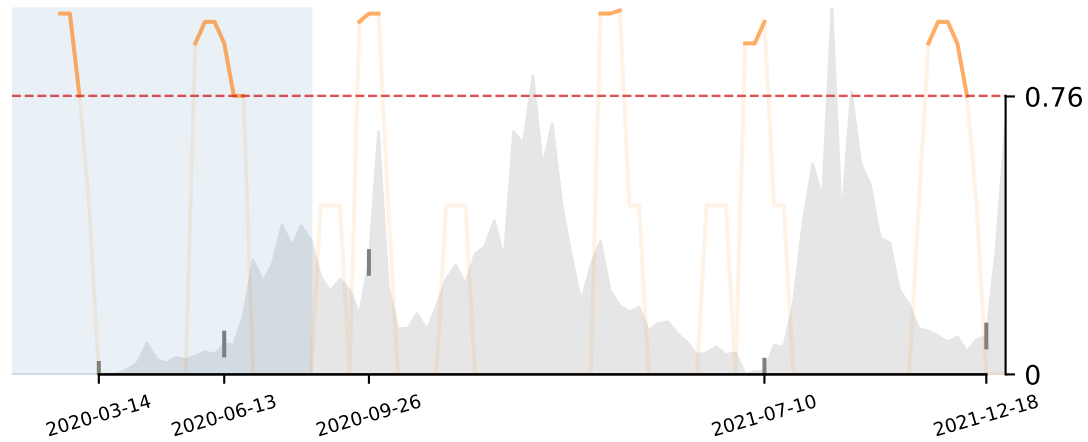

Model 3

- (GT) covid symptoms
- (GT) fever
- (GT) Ageusia
- (GT) Anosmia
- (GT) Cough
- (GT) Diarrhea

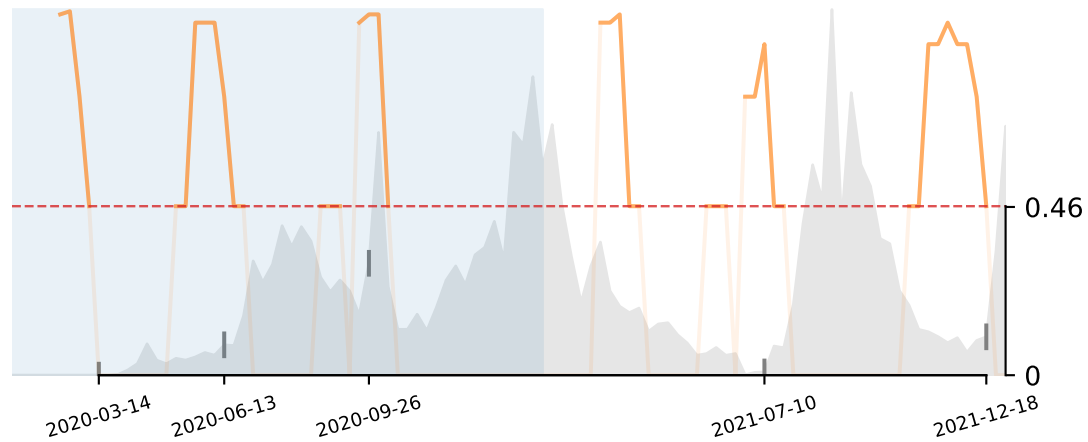

## Performance as a function of $\beta$

| $\beta$ | Training |    |    | Out of sample |    |    |
|---------|----------|----|----|---------------|----|----|
|         | tp       | fp | fn | tp            | fp | fn |
| 1.00    | 0        | 0  | 1  | 1             | 0  | 3  |
| 0.99    | 0        | 0  | 1  | 1             | 0  | 3  |
| 0.96    | 1        | 0  | 0  | 1             | 0  | 3  |
| 0.91    | 1        | 0  | 0  | 2             | 5  | 1  |
| 0.76    | 1        | 0  | 0  | 4             | 11 | 0  |
| 0.46    | 1        | 0  | 0  | 4             | 34 | 0  |
| 0.00    | 1        | 0  | 0  | 4             | 60 | 0  |

| $\beta$ | tp fp fn |   |   | tp fp fn |    |   |
|---------|----------|---|---|----------|----|---|
|         | 1.00     | 0 | 0 | 2        | 0  | 1 |
| 0.99    | 0        | 0 | 2 | 1        | 4  | 2 |
| 0.96    | 1        | 0 | 1 | 3        | 4  | 0 |
| 0.91    | 2        | 0 | 0 | 3        | 4  | 0 |
| 0.76    | 2        | 0 | 0 | 3        | 4  | 0 |
| 0.46    | 2        | 2 | 0 | 3        | 13 | 0 |
| 0.00    | 2        | 2 | 0 | 3        | 52 | 0 |

| $\beta$ | tp fp fn |   |   | tp fp fn |    |   |
|---------|----------|---|---|----------|----|---|
|         | 1.00     | 0 | 0 | 3        | 0  | 0 |
| 0.99    | 1        | 0 | 2 | 0        | 1  | 2 |
| 0.96    | 2        | 1 | 1 | 1        | 3  | 1 |
| 0.91    | 3        | 1 | 0 | 2        | 3  | 0 |
| 0.76    | 3        | 1 | 0 | 2        | 3  | 0 |
| 0.46    | 3        | 1 | 0 | 2        | 9  | 0 |
| 0.00    | 3        | 6 | 0 | 2        | 34 | 0 |

## Proxies selected by the Multiple Sources method

Model 1

- (GT) covid
- (GT) covid-19
- (GT) loss taste
- (GT) covid symptoms
- (GT) sars-cov-2
- (GT) Anosmia

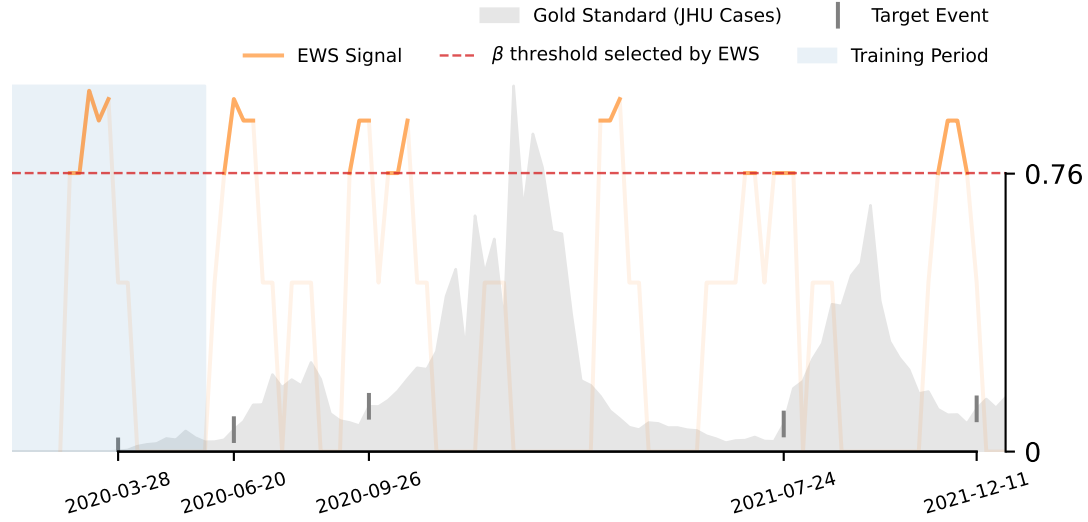

Model 2

- (GT) covid
- (GT) covid-19
- (GT) chest pain
- (GT) covid symptoms
- (GT) Ageusia
- (GT) Anosmia

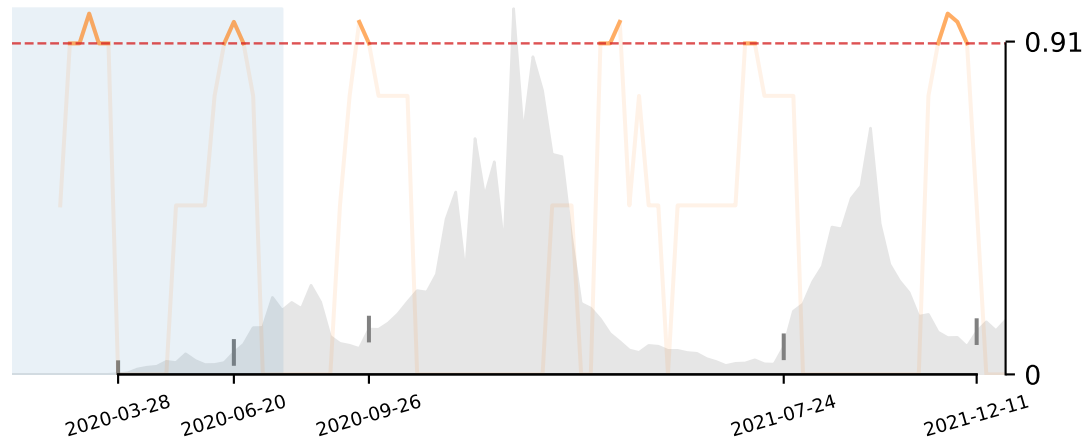

Model 3

- (GT) chest pain
- (GT) covid symptoms
- (GT) Ageusia
- (GT) Anosmia
- (GT) Hyperventilation
- (GT) Chills

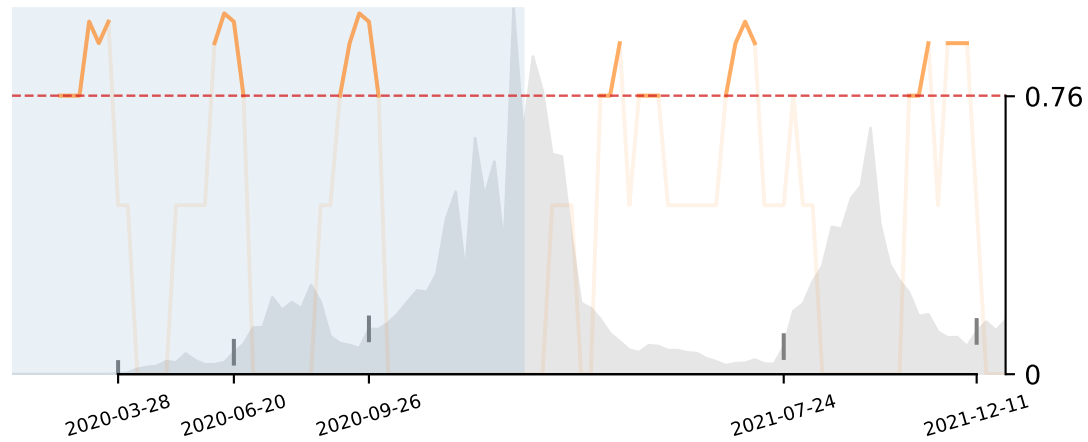

## Performance as a function of $\beta$

| $\beta$ | Training |    |    | Out of sample |    |    |
|---------|----------|----|----|---------------|----|----|
|         | tp       | fp | fn | tp            | fp | fn |
| 1.00    | 0        | 0  | 1  | 0             | 0  | 4  |
| 0.99    | 0        | 0  | 1  | 0             | 0  | 4  |
| 0.96    | 1        | 0  | 0  | 1             | 1  | 3  |
| 0.91    | 1        | 0  | 0  | 3             | 6  | 1  |
| 0.76    | 1        | 0  | 0  | 4             | 9  | 0  |
| 0.46    | 1        | 1  | 0  | 4             | 26 | 0  |
| 0.00    | 1        | 2  | 0  | 4             | 59 | 0  |

| $\beta$ | tp |    |    | fp |    |    | fn |    |    |
|---------|----|----|----|----|----|----|----|----|----|
|         | tp | fp | fn | tp | fp | fn | tp | fp | fn |
| 1.00    | 0  | 0  | 2  | 0  | 0  | 3  | 0  | 0  | 3  |
| 0.99    | 0  | 0  | 2  | 1  | 0  | 2  | 1  | 0  | 2  |
| 0.96    | 1  | 0  | 1  | 2  | 1  | 1  | 2  | 1  | 1  |
| 0.91    | 2  | 0  | 0  | 3  | 3  | 0  | 3  | 3  | 0  |
| 0.76    | 2  | 2  | 0  | 3  | 9  | 0  | 3  | 9  | 0  |
| 0.46    | 2  | 3  | 0  | 3  | 20 | 0  | 3  | 20 | 0  |
| 0.00    | 2  | 6  | 0  | 3  | 54 | 0  | 3  | 54 | 0  |

| $\beta$ | tp |    |    | fp |    |    | fn |    |    |
|---------|----|----|----|----|----|----|----|----|----|
|         | tp | fp | fn | tp | fp | fn | tp | fp | fn |
| 1.00    | 0  | 0  | 3  | 0  | 0  | 2  | 0  | 0  | 2  |
| 0.99    | 0  | 0  | 3  | 0  | 0  | 2  | 0  | 0  | 2  |
| 0.96    | 2  | 0  | 1  | 1  | 0  | 1  | 2  | 1  | 0  |
| 0.91    | 3  | 0  | 0  | 2  | 1  | 0  | 2  | 1  | 0  |
| 0.76    | 3  | 0  | 0  | 2  | 8  | 0  | 2  | 8  | 0  |
| 0.46    | 3  | 4  | 0  | 2  | 20 | 0  | 2  | 20 | 0  |
| 0.00    | 3  | 8  | 0  | 2  | 36 | 0  | 2  | 36 | 0  |

## Proxies selected by the Multiple Sources method

Model 1

- (GT) covid
- (GT) covid-19
- (GT) covid symptoms
- (GT) quarantine
- (GT) covid-19 who
- (GT) fever

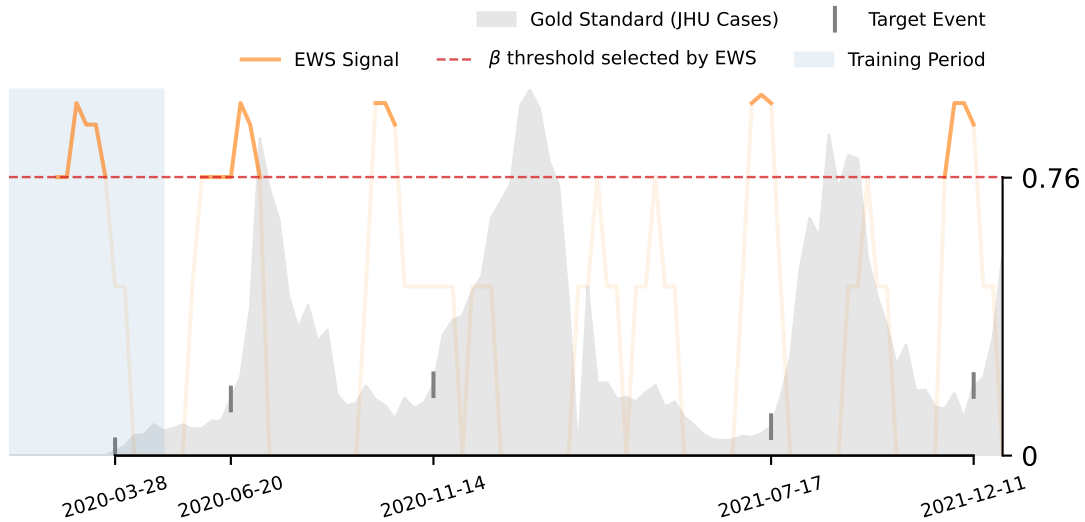

Model 2

- (GT) covid
- (GT) covid-19
- (GT) covid symptoms
- (GT) covid-19 who
- (GT) Acute bronchitis
- (GT) Anosmia

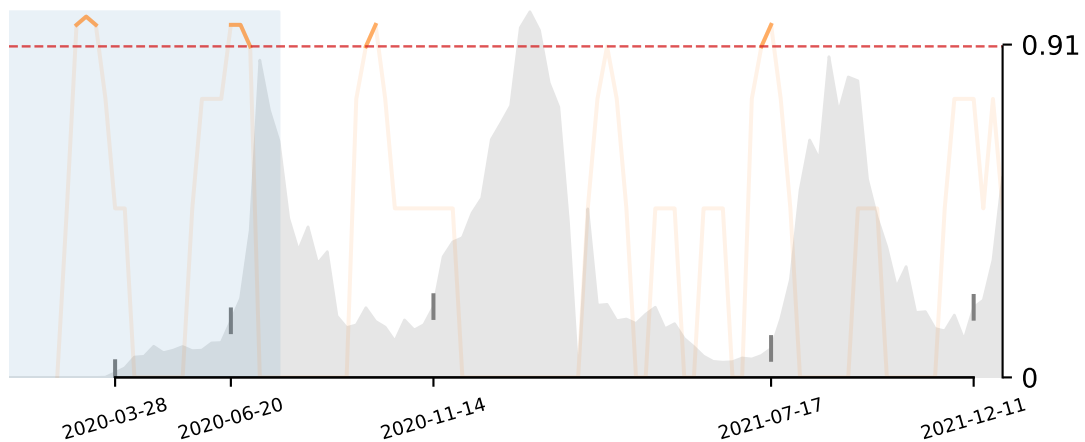

Model 3

- (GT) covid
- (GT) covid-19
- (GT) covid-19 who
- (GT) covid symptoms
- (GT) quarantine
- (GT) Acute bronchitis

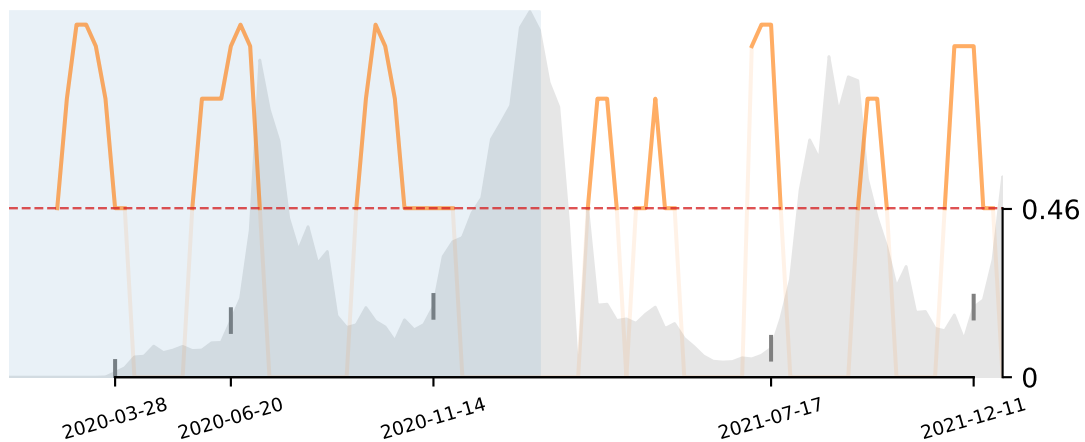

## Performance as a function of $\beta$

| $\beta$ | Training |    |    | Out of sample |    |    |
|---------|----------|----|----|---------------|----|----|
|         | tp       | fp | fn | tp            | fp | fn |
| 1.00    | 0        | 0  | 1  | 0             | 0  | 4  |
| 0.99    | 0        | 0  | 1  | 1             | 0  | 3  |
| 0.96    | 0        | 0  | 1  | 3             | 1  | 0  |
| 0.91    | 1        | 0  | 0  | 3             | 2  | 0  |
| 0.76    | 1        | 0  | 0  | 4             | 6  | 0  |
| 0.46    | 1        | 2  | 0  | 4             | 27 | 0  |
| 0.00    | 1        | 3  | 0  | 4             | 59 | 0  |

| $\beta$ | tp fp fn |   |   | tp fp fn |    |   |
|---------|----------|---|---|----------|----|---|
|         | 1.00     | 0 | 0 | 2        | 0  | 0 |
| 0.99    | 0        | 0 | 2 | 0        | 0  | 3 |
| 0.96    | 1        | 0 | 1 | 2        | 0  | 1 |
| 0.91    | 2        | 1 | 0 | 2        | 2  | 1 |
| 0.76    | 2        | 2 | 0 | 3        | 7  | 0 |
| 0.46    | 2        | 2 | 0 | 3        | 21 | 0 |
| 0.00    | 2        | 4 | 0 | 3        | 54 | 0 |

| $\beta$ | tp fp fn |    |   | tp fp fn |    |   |
|---------|----------|----|---|----------|----|---|
|         | 1.00     | 0  | 0 | 3        | 0  | 0 |
| 0.99    | 0        | 0  | 3 | 0        | 0  | 2 |
| 0.96    | 0        | 0  | 3 | 1        | 0  | 1 |
| 0.91    | 1        | 2  | 2 | 2        | 0  | 0 |
| 0.76    | 2        | 4  | 1 | 2        | 5  | 0 |
| 0.46    | 3        | 6  | 0 | 2        | 16 | 0 |
| 0.00    | 3        | 12 | 0 | 2        | 34 | 0 |

## Proxies selected by the Multiple Sources method

Model 1

- (GT) Abdominal pain
- (GT) Chest pain
- (GT) Nasal congestion
- (GT) Vertigo
- (GT) Cough
- (GT) Diarrhea

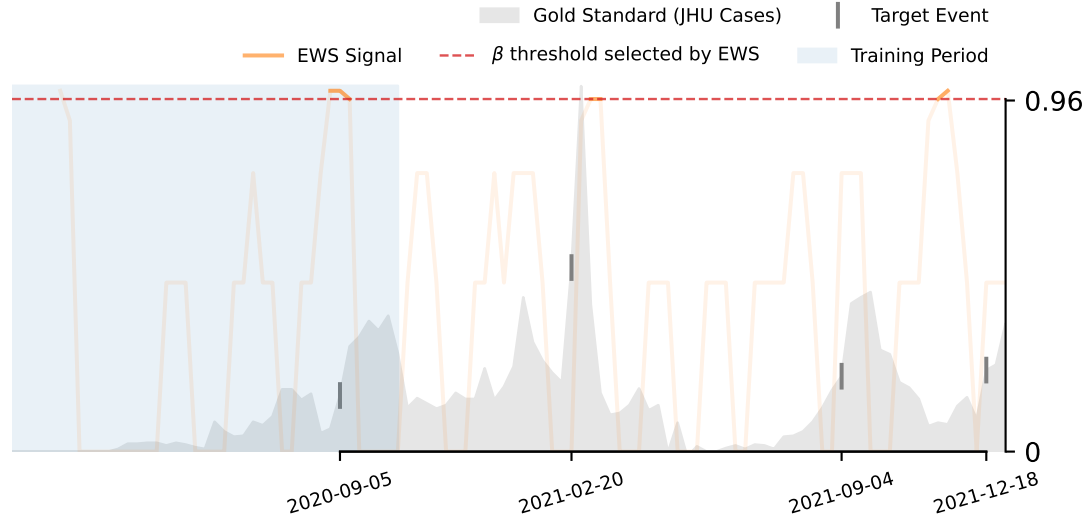

## Performance as a function of $\beta$

| $\beta$ | Training |    |    | Out of sample |    |    |
|---------|----------|----|----|---------------|----|----|
|         | tp       | fp | fn | tp            | fp | fn |
| 1.00    | 0        | 0  | 1  | 0             | 0  | 3  |
| 0.99    | 0        | 0  | 1  | 1             | 0  | 2  |
| 0.96    | 1        | 1  | 0  | 1             | 2  | 1  |
| 0.91    | 1        | 2  | 0  | 1             | 3  | 1  |
| 0.76    | 1        | 3  | 0  | 3             | 8  | 0  |
| 0.46    | 1        | 4  | 0  | 3             | 28 | 0  |
| 0.00    | 1        | 11 | 0  | 3             | 42 | 0  |

Model 2

- (GT) Cough
- (GT) Otitis
- Apple Mobility (transit)
- (GT) Diarrhea
- (GT) Vomiting

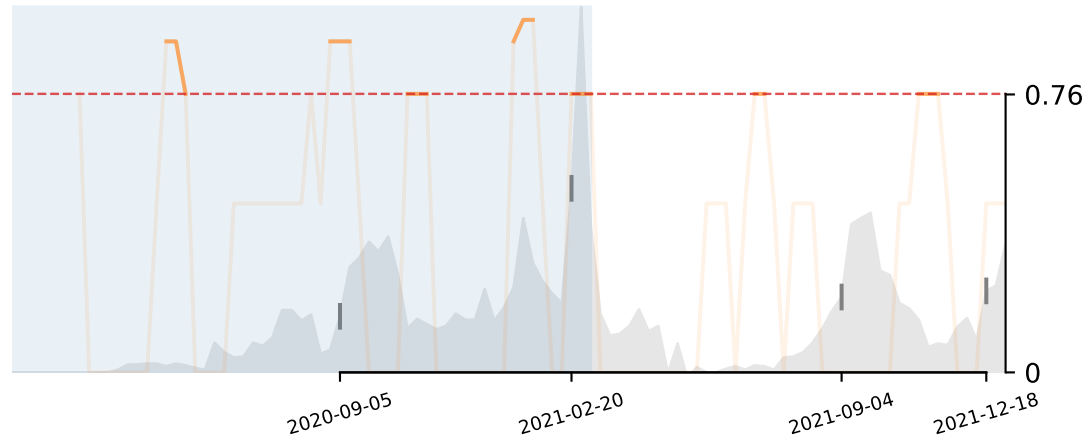

| $\beta$ | tp fp fn |    |   | tp fp fn |    |   |
|---------|----------|----|---|----------|----|---|
|         | 0.99     | 0  | 0 | 2        | 0  | 0 |
| 0.96    | 0        | 0  | 2 | 0        | 0  | 2 |
| 0.91    | 1        | 1  | 1 | 0        | 0  | 2 |
| 0.76    | 2        | 5  | 0 | 1        | 3  | 1 |
| 0.46    | 2        | 12 | 0 | 2        | 12 | 0 |
| 0.00    | 2        | 21 | 0 | 2        | 29 | 0 |

Model 3

- (GT) Cough
- Apple Mobility (transit)
- (GT) Chest pain
- (GT) Otitis
- (GT) Pneumonia
- (GT) Sore throat

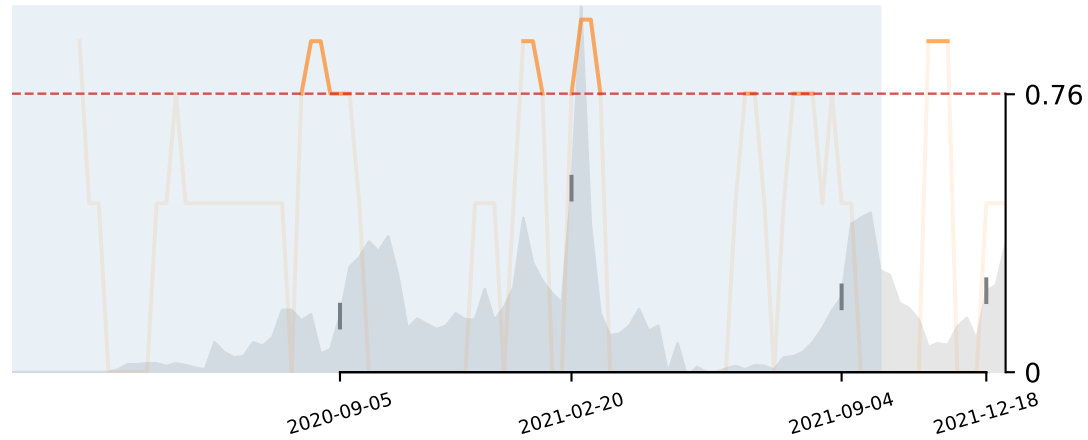

| $\beta$ | tp fp fn |    |   | tp fp fn |   |   |
|---------|----------|----|---|----------|---|---|
|         | 1.00     | 0  | 0 | 3        | 0 | 0 |
| 0.99    | 0        | 0  | 3 | 0        | 0 | 1 |
| 0.96    | 0        | 0  | 3 | 0        | 0 | 1 |
| 0.91    | 0        | 2  | 3 | 1        | 0 | 0 |
| 0.76    | 2        | 4  | 1 | 1        | 0 | 0 |
| 0.46    | 3        | 10 | 0 | 1        | 2 | 0 |
| 0.00    | 3        | 34 | 0 | 1        | 6 | 0 |



## Proxies selected by the Multiple Sources method

Model 1

- (GT) covid
- (GT) how long does covid last
- (GT) covid-19
- (GT) chest pain
- (GT) covid-19 who
- (GT) sars-cov-2

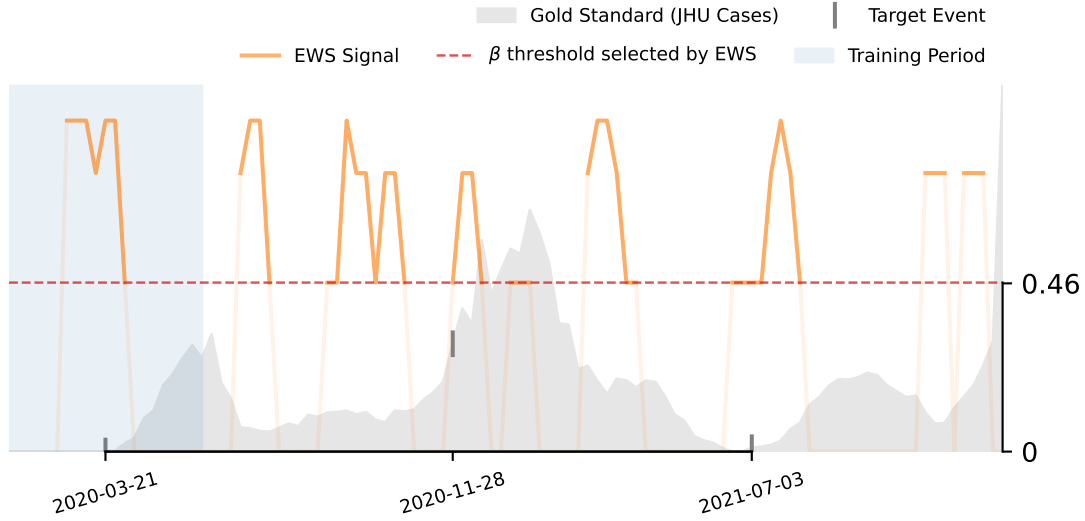

## Performance as a function of $\beta$

| $\beta$ | Training |    |    | Out of sample |    |    |
|---------|----------|----|----|---------------|----|----|
|         | tp       | fp | fn | tp            | fp | fn |
| 1.00    | 0        | 0  | 1  | 0             | 0  | 2  |
| 0.99    | 0        | 0  | 1  | 0             | 0  | 2  |
| 0.96    | 0        | 0  | 1  | 0             | 0  | 2  |
| 0.91    | 0        | 0  | 1  | 0             | 6  | 2  |
| 0.76    | 1        | 1  | 0  | 1             | 22 | 0  |
| 0.46    | 1        | 1  | 0  | 2             | 34 | 0  |
| 0.00    | 1        | 2  | 0  | 2             | 69 | 0  |

Model 2

- (GT) covid symptoms
- (GT) sars-cov-2
- (GT) Chest pain
- (GT) Ageusia
- (GT) Otitis

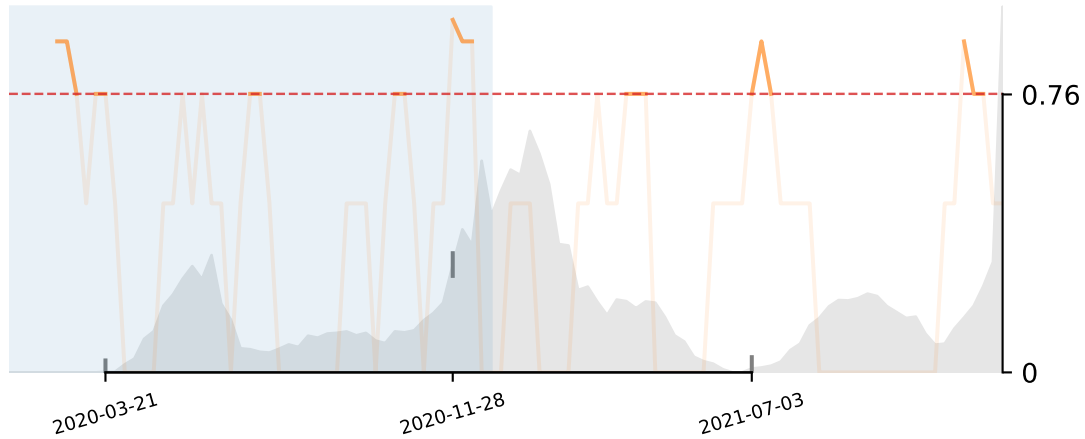

| $\beta$ | tp fp fn |    |   | tp fp fn |    |   |
|---------|----------|----|---|----------|----|---|
|         | 0.99     | 0  | 0 | 2        | 0  | 0 |
| 0.96    | 0        | 0  | 2 | 0        | 0  | 1 |
| 0.91    | 1        | 0  | 1 | 0        | 2  | 0 |
| 0.76    | 2        | 3  | 0 | 1        | 9  | 0 |
| 0.46    | 2        | 9  | 0 | 1        | 24 | 0 |
| 0.00    | 2        | 21 | 0 | 1        | 46 | 0 |

Model 3

- (GT) covid symptoms
- (GT) Ageusia
- (GT) Chest pain
- (GT) loss of smell
- (GT) sars-cov-2
- (GT) Fatigue

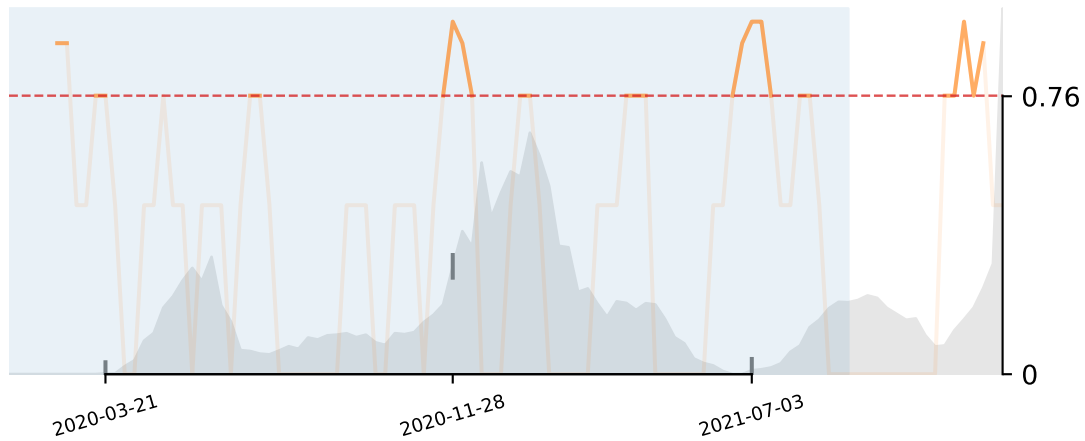

| $\beta$ | tp fp fn |    |   | tp fp fn |    |   |
|---------|----------|----|---|----------|----|---|
|         | 1.00     | 0  | 0 | 3        | 0  | 0 |
| 0.99    | 0        | 0  | 3 | 0        | 0  | 0 |
| 0.96    | 0        | 0  | 3 | 0        | 1  | 0 |
| 0.91    | 2        | 1  | 1 | 0        | 2  | 0 |
| 0.76    | 3        | 3  | 0 | 0        | 5  | 0 |
| 0.46    | 3        | 15 | 0 | 0        | 7  | 0 |
| 0.00    | 3        | 38 | 0 | 0        | 16 | 0 |

## Proxies selected by the Multiple Sources method

Model 1

- (GT) covid
- (GT) how long does covid last
- (GT) covid-19
- (GT) chest pain
- (GT) covid symptoms
- (GT) chest tightness

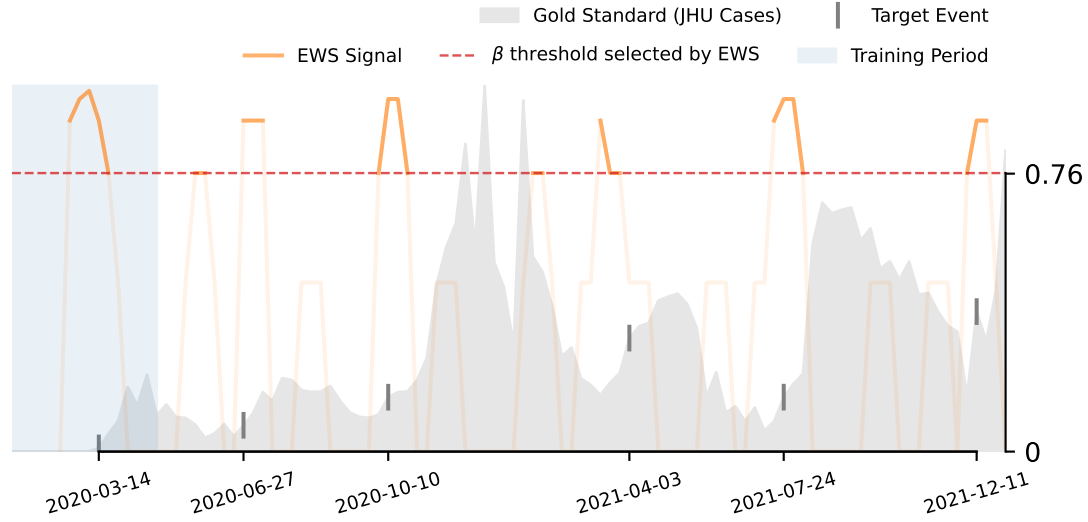

Model 2

- (GT) covid
- (GT) covid-19
- (GT) chest pain
- (GT) covid symptoms
- (GT) fever
- (GT) Ageusia

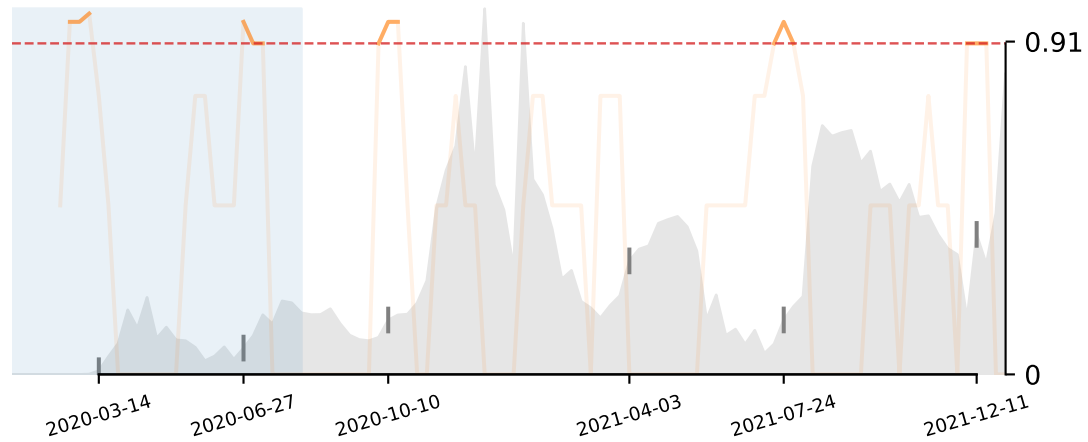

Model 3

- (GT) chest pain
- (GT) covid symptoms
- (GT) Ageusia
- (GT) Anosmia
- (GT) Throat irritation
- up2date

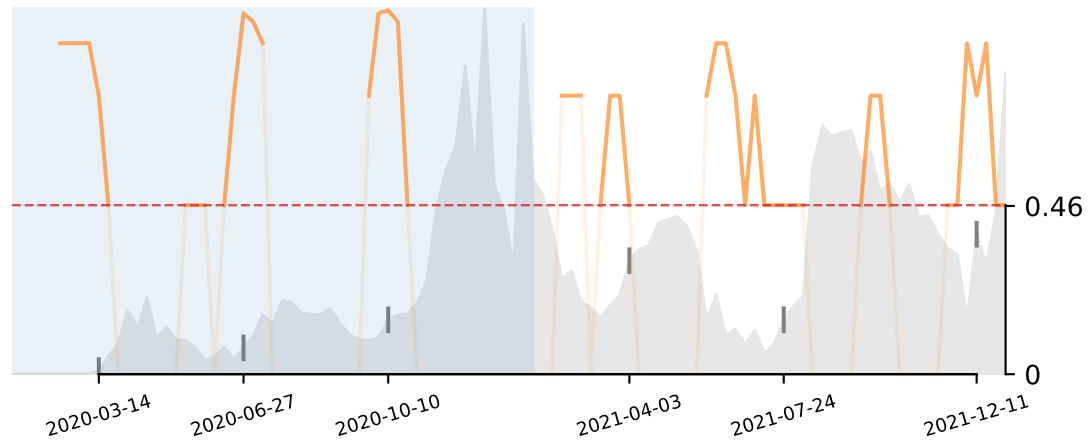

## Performance as a function of $\beta$

| $\beta$ | Training |    |    | Out of sample |    |    |
|---------|----------|----|----|---------------|----|----|
|         | tp       | fp | fn | tp            | fp | fn |
| 1.00    | 0        | 0  | 1  | 0             | 0  | 5  |
| 0.99    | 0        | 0  | 1  | 0             | 0  | 5  |
| 0.96    | 1        | 0  | 0  | 2             | 2  | 3  |
| 0.91    | 1        | 0  | 0  | 5             | 5  | 0  |
| 0.76    | 1        | 0  | 0  | 5             | 9  | 0  |
| 0.46    | 1        | 1  | 0  | 5             | 25 | 0  |
| 0.00    | 1        | 2  | 0  | 5             | 53 | 0  |

| $\beta$ | tp |    |    | fp |    |    | fn |    |    |
|---------|----|----|----|----|----|----|----|----|----|
|         | tp | fp | fn | tp | fp | fn | tp | fp | fn |
| 1.00    | 0  | 0  | 2  | 0  | 0  | 4  | 0  | 0  | 4  |
| 0.99    | 0  | 0  | 2  | 0  | 0  | 4  | 0  | 0  | 4  |
| 0.96    | 1  | 0  | 1  | 2  | 1  | 2  | 3  | 3  | 1  |
| 0.91    | 2  | 0  | 0  | 3  | 3  | 1  | 4  | 7  | 0  |
| 0.76    | 2  | 2  | 0  | 4  | 7  | 0  | 4  | 21 | 0  |
| 0.46    | 2  | 3  | 0  | 4  | 21 | 0  | 4  | 45 | 0  |
| 0.00    | 2  | 5  | 0  | 4  | 45 | 0  | 4  | 45 | 0  |

| $\beta$ | tp |    |    | fp |    |    | fn |    |    |
|---------|----|----|----|----|----|----|----|----|----|
|         | tp | fp | fn | tp | fp | fn | tp | fp | fn |
| 1.00    | 0  | 0  | 3  | 0  | 0  | 3  | 0  | 0  | 3  |
| 0.99    | 1  | 0  | 2  | 0  | 0  | 3  | 0  | 0  | 3  |
| 0.96    | 2  | 0  | 1  | 0  | 0  | 3  | 2  | 2  | 1  |
| 0.91    | 2  | 2  | 1  | 2  | 2  | 1  | 3  | 6  | 0  |
| 0.76    | 3  | 3  | 0  | 3  | 12 | 0  | 3  | 12 | 0  |
| 0.46    | 3  | 3  | 0  | 3  | 28 | 0  | 3  | 28 | 0  |
| 0.00    | 3  | 7  | 0  | 3  | 28 | 0  | 3  | 28 | 0  |

**Figures S140-S187.**

Visualization of the multiple sources model as a function of time. The model's output (orange) is compared against the onsets (vertical gray tick marks) of the COVID-19 reported cases (gray-filled curve). As more information becomes available, the EWS model is re-trained to select the proxies that best fit the training data available (represented by the blue shading on each Figure). A list of the selected proxies for each model, along with a performance table are also presented.

## Proxies selected by the Multiple Sources method

Model 1

- (GT) chest tightness
- (GT) sars-cov-2
- (GT) covid
- (GT) covid-19
- (GT) covid symptoms
- (GT) quarantine

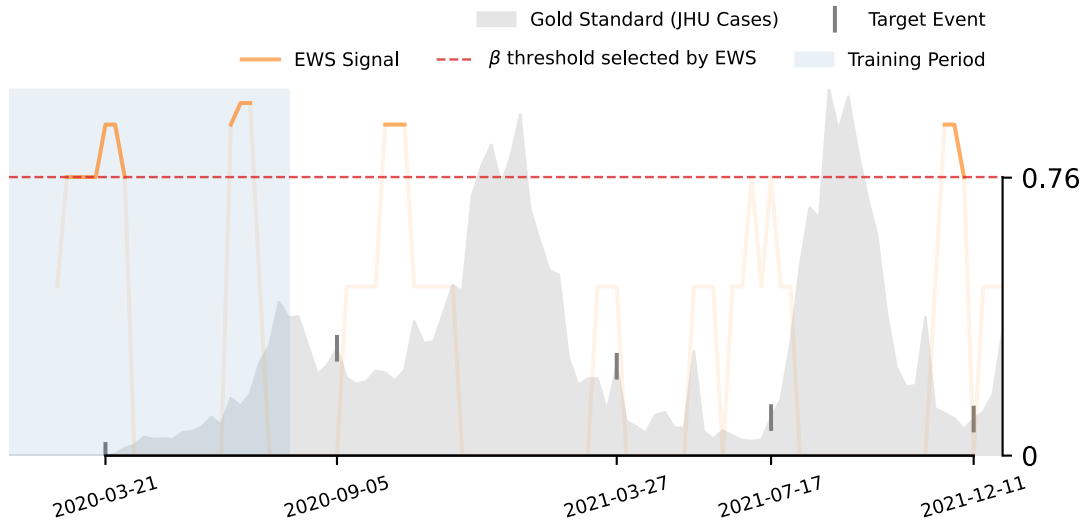

Model 2

- (GT) Acute bronchitis
- (GT) Nasal congestion
- (GT) Wheeze
- (GT) Ageusia
- (GT) Burning Chest Pain

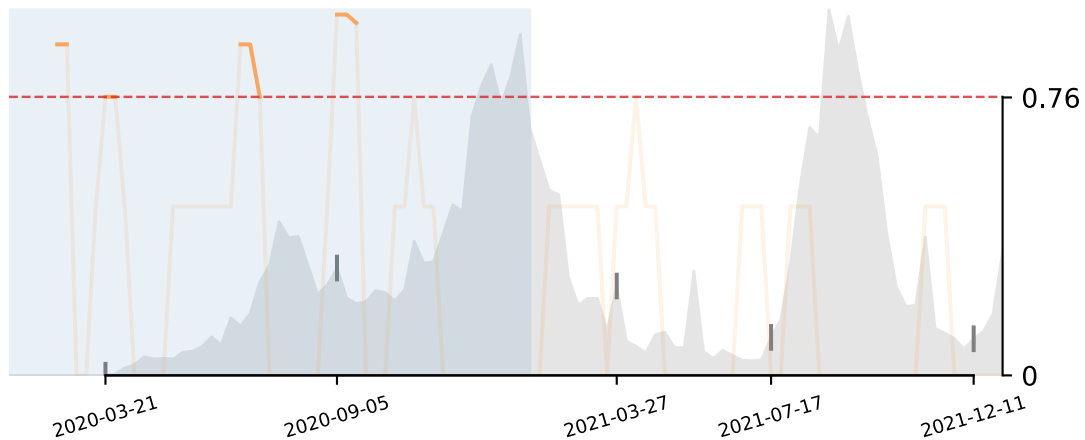

Model 3

- (GT) Acute bronchitis
- (GT) Nasal congestion
- (GT) loss taste
- (GT) Ageusia
- (GT) Bronchitis
- (GT) Burning Chest Pain

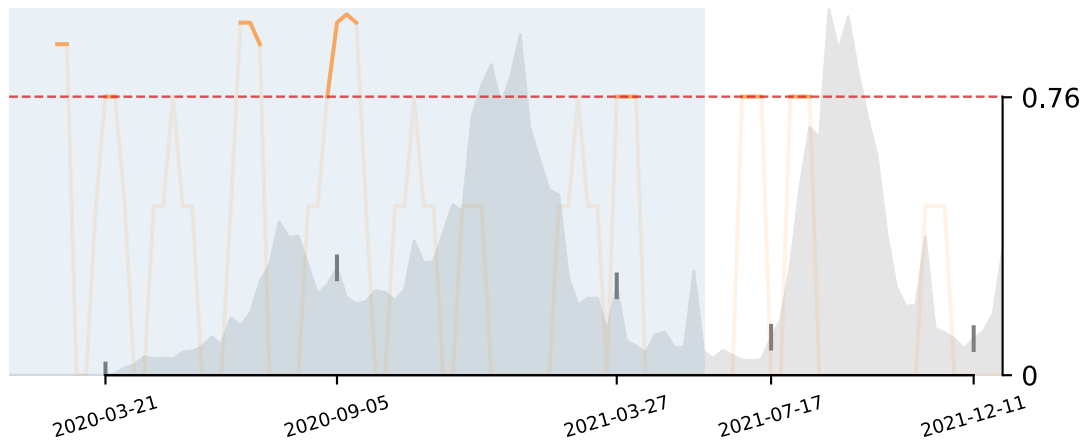

## Performance as a function of $\beta$

| $\beta$ | Training |    |    | Out of sample |    |    |
|---------|----------|----|----|---------------|----|----|
|         | tp       | fp | fn | tp            | fp | fn |
| 1.00    | 0        | 0  | 1  | 0             | 0  | 4  |
| 0.99    | 0        | 0  | 1  | 0             | 0  | 4  |
| 0.96    | 0        | 0  | 1  | 0             | 0  | 4  |
| 0.91    | 0        | 2  | 1  | 1             | 3  | 3  |
| 0.76    | 1        | 4  | 0  | 2             | 3  | 2  |
| 0.46    | 1        | 5  | 0  | 3             | 19 | 0  |
| 0.00    | 1        | 7  | 0  | 4             | 48 | 0  |

| $\beta$ | tp | fp | fn | tp | fp | fn |
|---------|----|----|----|----|----|----|
| 0.99    | 0  | 0  | 2  | 0  | 0  | 3  |
| 0.96    | 1  | 1  | 1  | 0  | 0  | 3  |
| 0.91    | 1  | 2  | 1  | 0  | 0  | 3  |
| 0.76    | 2  | 5  | 0  | 0  | 1  | 2  |
| 0.46    | 2  | 8  | 0  | 3  | 8  | 0  |
| 0.00    | 2  | 20 | 0  | 3  | 28 | 0  |

| $\beta$ | tp | fp | fn | tp | fp | fn |
|---------|----|----|----|----|----|----|
| 1.00    | 0  | 0  | 3  | 0  | 0  | 2  |
| 0.99    | 0  | 0  | 3  | 0  | 0  | 2  |
| 0.96    | 0  | 1  | 3  | 0  | 0  | 2  |
| 0.91    | 1  | 4  | 2  | 0  | 0  | 2  |
| 0.76    | 2  | 6  | 1  | 1  | 3  | 1  |
| 0.46    | 3  | 11 | 0  | 2  | 3  | 0  |
| 0.00    | 3  | 27 | 0  | 2  | 17 | 0  |

## Proxies selected by the Multiple Sources method

Model 1

- (JHU) cases
- (GT) covid
- (GT) covid-19
- (GT) covid symptoms
- (GT) quarantine
- (GT) fever

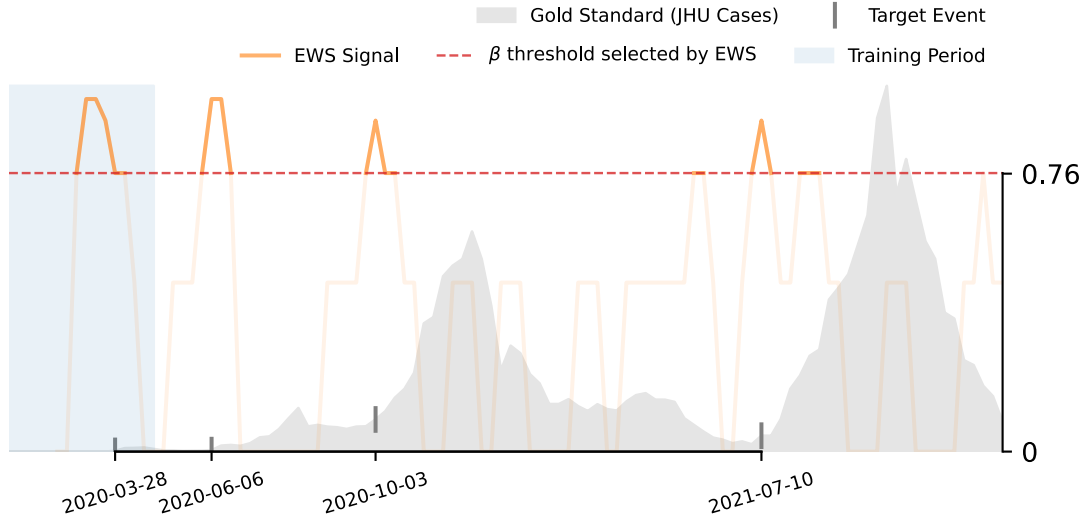

Model 2

- (JHU) cases
- (GT) covid
- (GT) covid-19
- (GT) covid symptoms
- (GT) fever
- (GT) Cardiac arrest

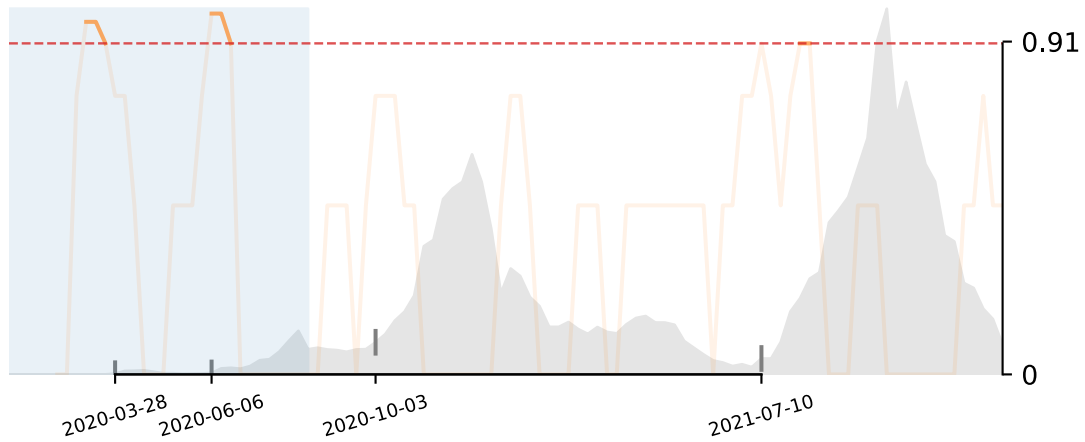

Model 3

- (JHU) cases
- (GT) covid
- (GT) covid symptoms
- (GT) Asthma
- (GT) fever
- (GT) Cardiac arrest

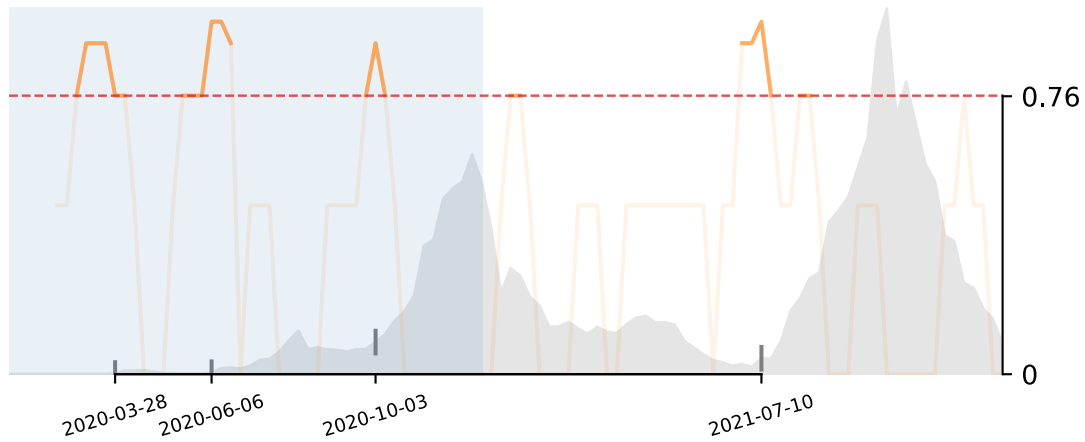

## Performance as a function of $\beta$

| $\beta$ | Training |    |    | Out of sample |    |    |
|---------|----------|----|----|---------------|----|----|
|         | tp       | fp | fn | tp            | fp | fn |
| 1.00    | 0        | 0  | 1  | 0             | 0  | 3  |
| 0.99    | 0        | 0  | 1  | 0             | 0  | 3  |
| 0.96    | 0        | 0  | 1  | 1             | 1  | 2  |
| 0.91    | 1        | 0  | 0  | 3             | 1  | 0  |
| 0.76    | 1        | 0  | 0  | 3             | 10 | 0  |
| 0.46    | 1        | 1  | 0  | 3             | 39 | 0  |
| 0.00    | 1        | 2  | 0  | 3             | 68 | 0  |

| $\beta$ | tp fp fn |   |   | tp fp fn |    |   |
|---------|----------|---|---|----------|----|---|
|         | 1.00     | 0 | 0 | 2        | 0  | 0 |
| 0.99    | 0        | 0 | 2 | 0        | 0  | 2 |
| 0.96    | 1        | 1 | 1 | 0        | 0  | 2 |
| 0.91    | 2        | 1 | 0 | 1        | 2  | 1 |
| 0.76    | 2        | 2 | 0 | 2        | 9  | 0 |
| 0.46    | 2        | 3 | 0 | 2        | 33 | 0 |
| 0.00    | 2        | 4 | 0 | 2        | 58 | 0 |

| $\beta$ | tp fp fn |    |   | tp fp fn |    |   |
|---------|----------|----|---|----------|----|---|
|         | 1.00     | 0  | 0 | 3        | 0  | 0 |
| 0.99    | 0        | 0  | 3 | 0        | 0  | 1 |
| 0.96    | 0        | 0  | 3 | 1        | 0  | 0 |
| 0.91    | 1        | 1  | 2 | 1        | 0  | 0 |
| 0.76    | 3        | 2  | 0 | 1        | 6  | 0 |
| 0.46    | 3        | 4  | 0 | 1        | 29 | 0 |
| 0.00    | 3        | 12 | 0 | 1        | 47 | 0 |

## Proxies selected by the Multiple Sources method

Model 1

- (JHU) cases
- (GT) covid
- (GT) how long does covid last
- (GT) covid-19
- (GT) chest pain
- (GT) covid symptoms

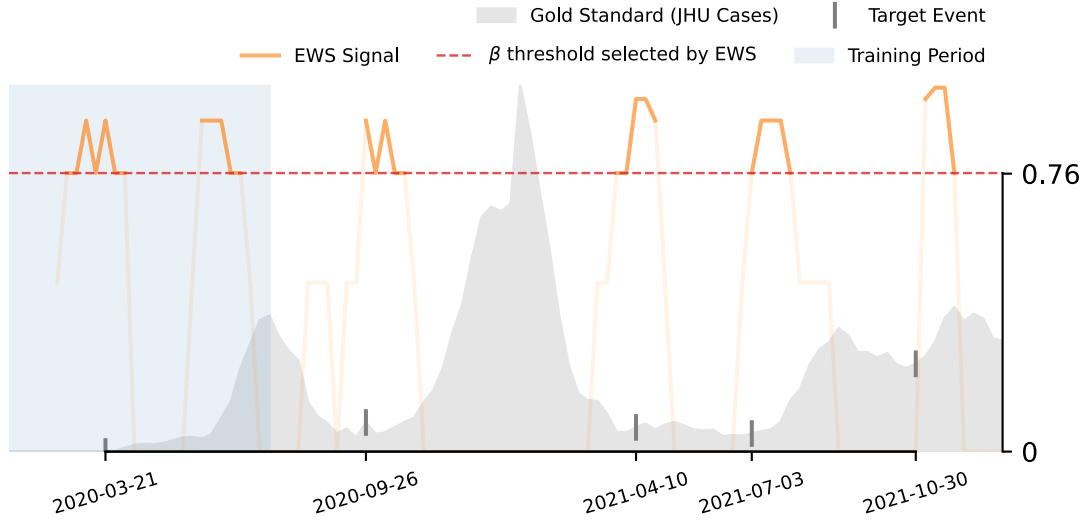

Model 2

- (JHU) cases
- (GT) covid-19
- (GT) chest pain
- (GT) covid symptoms
- (GT) fever
- (GT) Acute bronchitis

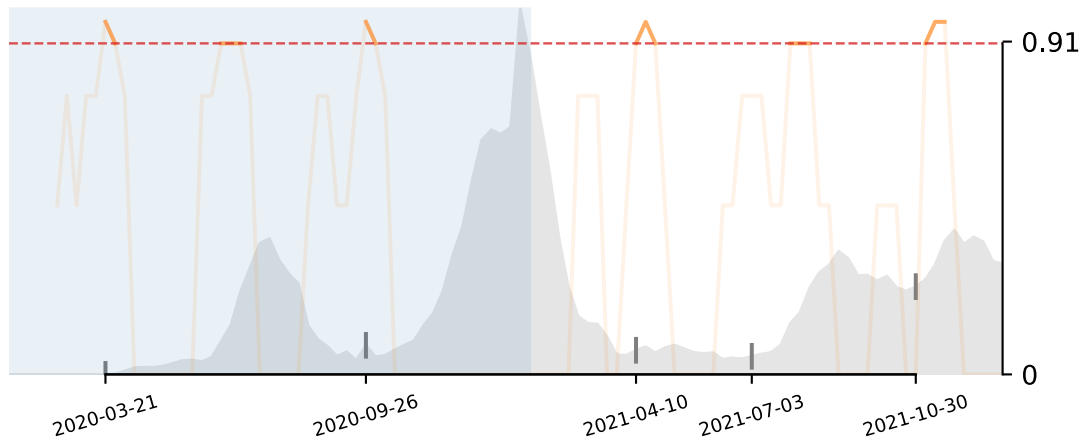

Model 3

- (GT) covid-19
- (GT) chest pain
- (GT) covid symptoms
- (GT) fever
- (GT) Acute bronchitis
- (GT) Chills

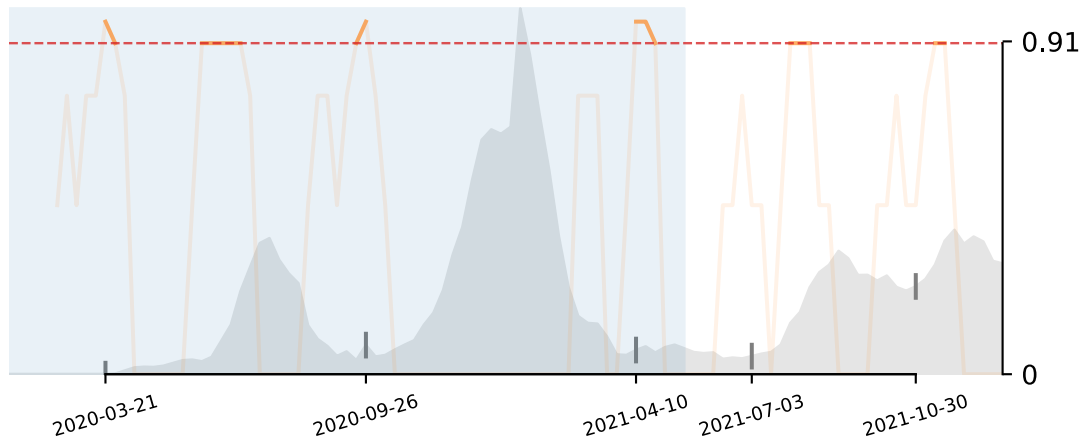

## Performance as a function of $\beta$

| $\beta$ | Training |    |    | Out of sample |    |    |
|---------|----------|----|----|---------------|----|----|
|         | tp       | fp | fn | tp            | fp | fn |
| 1.00    | 0        | 0  | 1  | 0             | 2  | 3  |
| 0.99    | 0        | 0  | 1  | 0             | 2  | 3  |
| 0.96    | 0        | 0  | 1  | 1             | 4  | 2  |
| 0.91    | 0        | 0  | 1  | 2             | 9  | 0  |
| 0.76    | 1        | 3  | 0  | 3             | 14 | 0  |
| 0.46    | 1        | 7  | 0  | 3             | 20 | 0  |
| 0.00    | 1        | 10 | 0  | 4             | 48 | 0  |

| $\beta$ | tp fp fn |    |   | tp fp fn |    |   |
|---------|----------|----|---|----------|----|---|
|         | 1.00     | 0  | 0 | 2        | 0  | 0 |
| 0.99    | 0        | 0  | 2 | 0        | 0  | 3 |
| 0.96    | 0        | 0  | 2 | 0        | 3  | 1 |
| 0.91    | 2        | 0  | 0 | 1        | 8  | 1 |
| 0.76    | 2        | 5  | 0 | 2        | 9  | 0 |
| 0.46    | 2        | 11 | 0 | 3        | 15 | 0 |
| 0.00    | 2        | 13 | 0 | 3        | 28 | 0 |

| $\beta$ | tp fp fn |    |   | tp fp fn |    |   |
|---------|----------|----|---|----------|----|---|
|         | 1.00     | 0  | 0 | 3        | 0  | 0 |
| 0.99    | 0        | 0  | 3 | 0        | 0  | 2 |
| 0.96    | 0        | 0  | 3 | 0        | 0  | 2 |
| 0.91    | 3        | 1  | 0 | 0        | 5  | 1 |
| 0.76    | 3        | 8  | 0 | 2        | 6  | 0 |
| 0.46    | 3        | 14 | 0 | 2        | 11 | 0 |
| 0.00    | 3        | 18 | 0 | 2        | 19 | 0 |

## Proxies selected by the Multiple Sources method

Model 1

- (GT) chest tightness
- (GT) Viral pneumonia
- (GT) covid
- (GT) covid-19
- (GT) chest pain
- (GT) covid symptoms

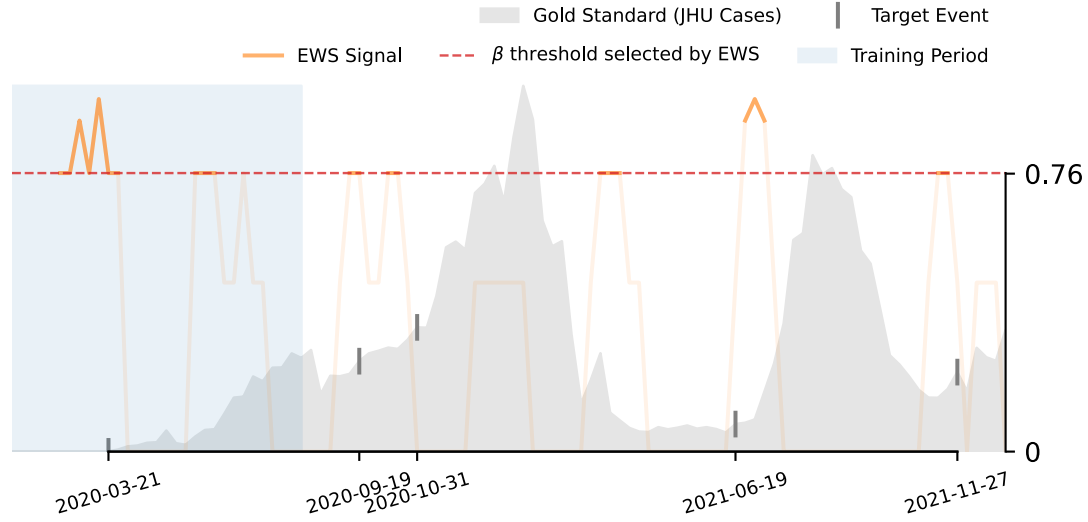

Model 2

- (GT) chest pain
- (GT) covid symptoms
- (GT) fever
- (GT) Abdominal pain
- (GT) Acute bronchitis
- (GT) Asthma

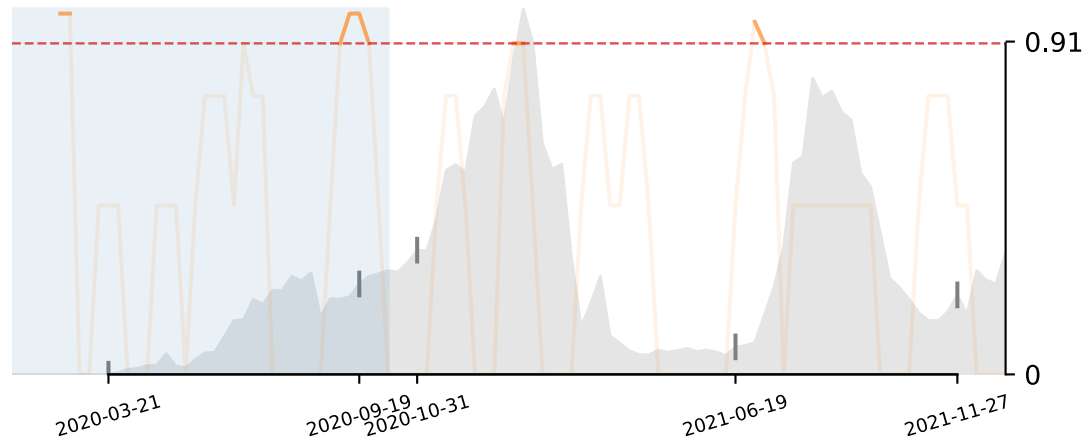

Model 3

- (GT) Burning Chest Pain
- (GT) covid
- (GT) covid-19
- (GT) covid symptoms
- (GT) quarantine
- (GT) Abdominal pain

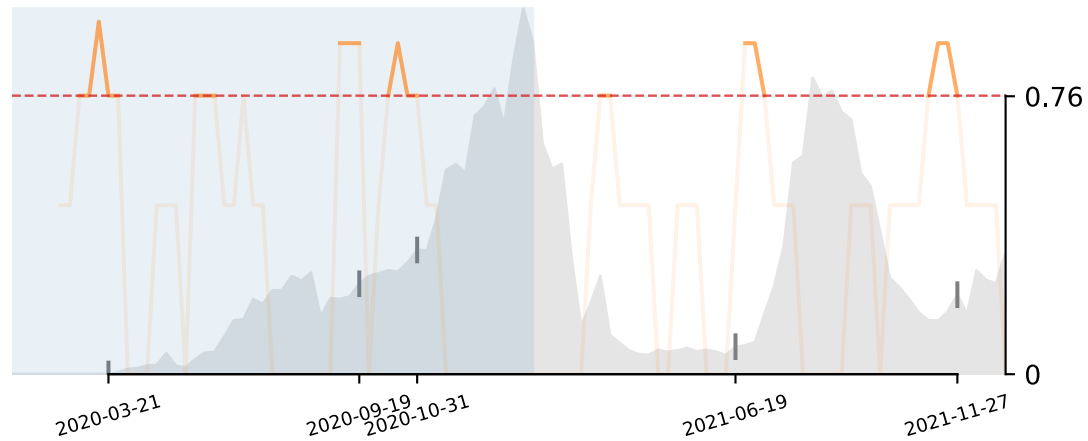

## Performance as a function of $\beta$

| $\beta$ | Training |    |    | Out of sample |    |    |
|---------|----------|----|----|---------------|----|----|
|         | tp       | fp | fn | tp            | fp | fn |
| 1.00    | 0        | 0  | 1  | 0             | 0  | 4  |
| 0.99    | 0        | 0  | 1  | 0             | 0  | 4  |
| 0.96    | 0        | 0  | 1  | 0             | 1  | 3  |
| 0.91    | 1        | 0  | 0  | 0             | 3  | 3  |
| 0.76    | 1        | 0  | 0  | 3             | 6  | 0  |
| 0.46    | 1        | 6  | 0  | 4             | 19 | 0  |
| 0.00    | 1        | 10 | 0  | 4             | 47 | 0  |

| $\beta$ | tp fp fn |    |   | tp fp fn |    |   |
|---------|----------|----|---|----------|----|---|
|         | 1.00     | 0  | 0 | 2        | 0  | 0 |
| 0.99    | 0        | 0  | 2 | 0        | 0  | 3 |
| 0.96    | 2        | 1  | 0 | 0        | 1  | 2 |
| 0.91    | 2        | 1  | 0 | 0        | 4  | 2 |
| 0.76    | 2        | 3  | 0 | 1        | 13 | 1 |
| 0.46    | 2        | 8  | 0 | 2        | 30 | 0 |
| 0.00    | 2        | 15 | 0 | 3        | 47 | 0 |

| $\beta$ | tp fp fn |    |   | tp fp fn |    |   |
|---------|----------|----|---|----------|----|---|
|         | 1.00     | 0  | 0 | 3        | 0  | 0 |
| 0.99    | 0        | 0  | 3 | 0        | 0  | 2 |
| 0.96    | 0        | 0  | 3 | 0        | 0  | 2 |
| 0.91    | 1        | 0  | 2 | 1        | 2  | 0 |
| 0.76    | 3        | 0  | 0 | 1        | 5  | 0 |
| 0.46    | 3        | 5  | 0 | 2        | 21 | 0 |
| 0.00    | 3        | 15 | 0 | 2        | 35 | 0 |

## Proxies selected by the Multiple Sources method

### Model 1

- (JHU) cases
- (GT) Anxiety
- (GT) covid
- (GT) covid-19
- (GT) loss taste
- (GT) loss of smell

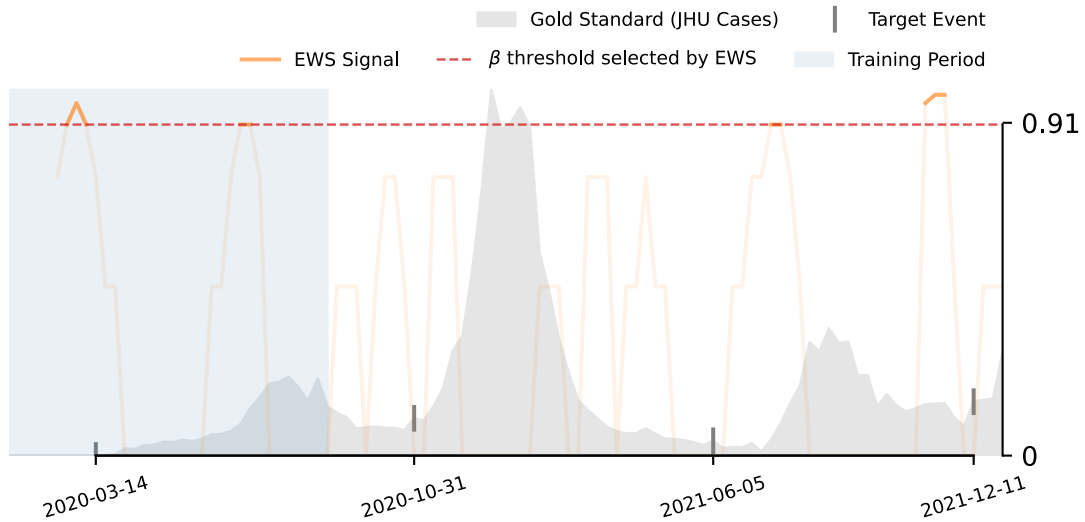

### Model 2

- (JHU) cases
- (GT) loss of smell
- (GT) chest tightness
- (GT) quarantine
- (GT) sars-cov-2
- (GT) Ageusia

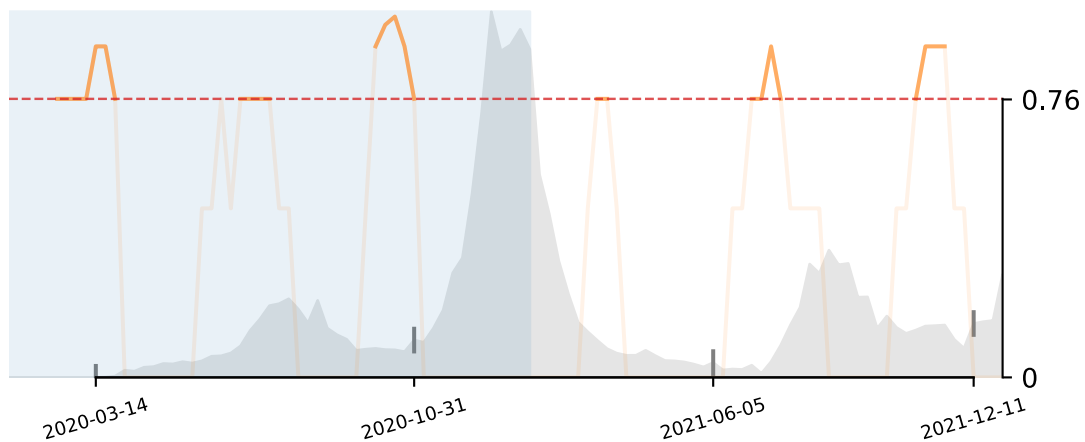

### Model 3

- (JHU) cases
- (GT) Ageusia
- (GT) Anosmia
- (GT) Viral pneumonia
- (GT) loss of smell
- (GT) quarantine

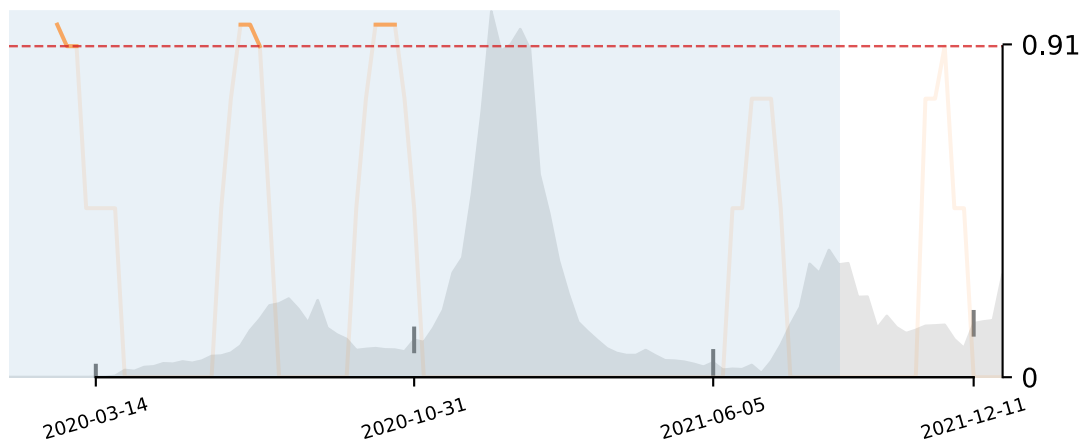

## Performance as a function of $\beta$

| $\beta$ | Training |    |    | Out of sample |    |    |
|---------|----------|----|----|---------------|----|----|
|         | tp       | fp | fn | tp            | fp | fn |
| 1.00    | 0        | 0  | 1  | 0             | 0  | 3  |
| 0.99    | 0        | 0  | 1  | 1             | 0  | 2  |
| 0.96    | 0        | 0  | 1  | 1             | 0  | 2  |
| 0.91    | 1        | 0  | 0  | 1             | 2  | 2  |
| 0.76    | 1        | 2  | 0  | 2             | 12 | 1  |
| 0.46    | 1        | 4  | 0  | 3             | 25 | 0  |
| 0.00    | 1        | 8  | 0  | 3             | 49 | 0  |

| $\beta$ | tp fp fn |    |   | tp fp fn |    |   |
|---------|----------|----|---|----------|----|---|
|         | 1.00     | 0  | 0 | 2        | 0  | 0 |
| 0.99    | 0        | 0  | 2 | 0        | 0  | 2 |
| 0.96    | 1        | 0  | 1 | 0        | 0  | 2 |
| 0.91    | 1        | 0  | 1 | 1        | 1  | 1 |
| 0.76    | 2        | 1  | 0 | 1        | 6  | 1 |
| 0.46    | 2        | 7  | 0 | 1        | 16 | 0 |
| 0.00    | 2        | 13 | 0 | 2        | 35 | 0 |

| $\beta$ | tp fp fn |    |   | tp fp fn |    |   |
|---------|----------|----|---|----------|----|---|
|         | 1.00     | 0  | 0 | 3        | 0  | 0 |
| 0.99    | 0        | 0  | 3 | 0        | 0  | 1 |
| 0.96    | 0        | 0  | 3 | 0        | 0  | 1 |
| 0.91    | 2        | 2  | 1 | 1        | 0  | 0 |
| 0.76    | 2        | 3  | 1 | 1        | 0  | 0 |
| 0.46    | 2        | 8  | 1 | 1        | 0  | 0 |
| 0.00    | 2        | 16 | 1 | 1        | 10 | 0 |



## Proxies selected by the Multiple Sources method

Model 1

- (GT) covid
- (GT) covid-19
- (GT) chest pain
- (GT) covid symptoms
- (GT) quarantine
- (GT) nose bleed

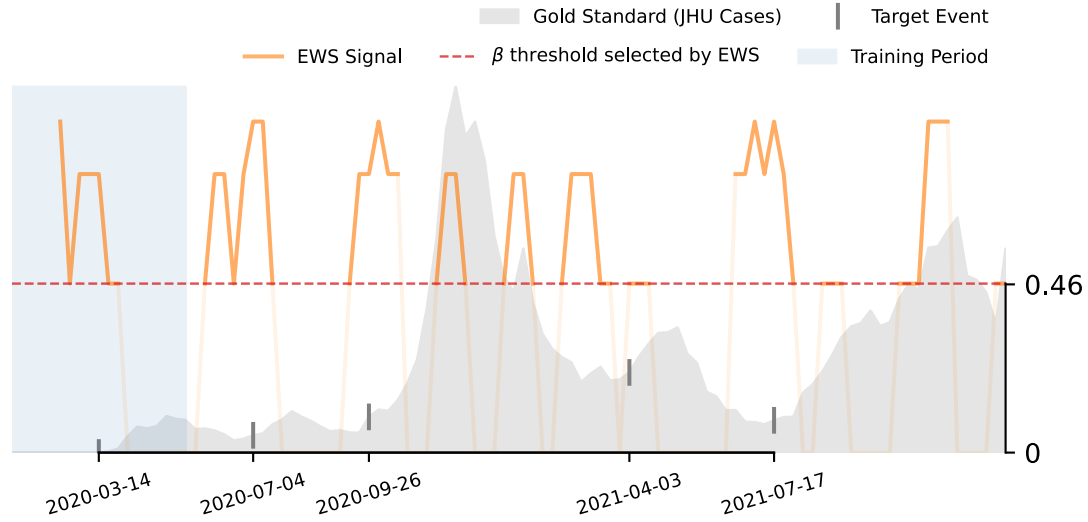

## Performance as a function of $\beta$

| $\beta$ | Training |    |    | Out of sample |    |    |
|---------|----------|----|----|---------------|----|----|
|         | tp       | fp | fn | tp            | fp | fn |
| 1.00    | 0        | 0  | 1  | 0             | 0  | 4  |
| 0.99    | 0        | 0  | 1  | 0             | 0  | 4  |
| 0.96    | 0        | 0  | 1  | 0             | 0  | 4  |
| 0.91    | 0        | 0  | 1  | 2             | 5  | 1  |
| 0.76    | 1        | 0  | 0  | 4             | 12 | 0  |
| 0.46    | 1        | 0  | 0  | 4             | 29 | 0  |
| 0.00    | 1        | 2  | 0  | 4             | 57 | 0  |

Model 2

- (GT) covid
- (GT) covid-19
- (GT) chest pain
- (GT) covid symptoms
- (GT) quarantine
- (GT) Acute bronchitis

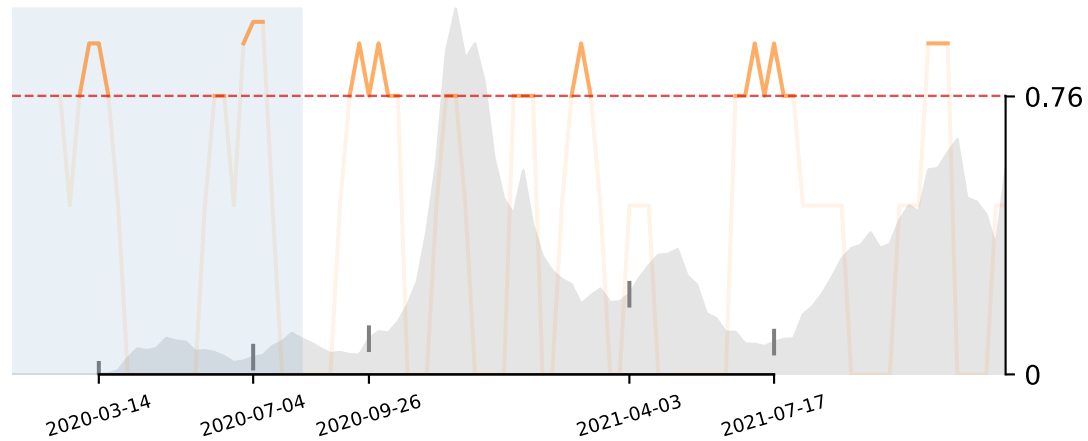

| $\beta$ | tp |    |    | fp |    |    | fn |    |    |
|---------|----|----|----|----|----|----|----|----|----|
|         | tp | fp | fn | tp | fp | fn | tp | fp | fn |
| 1.00    | 0  | 0  | 2  | 0  | 0  | 3  | 0  | 0  | 3  |
| 0.99    | 0  | 0  | 2  | 0  | 0  | 3  | 0  | 0  | 3  |
| 0.96    | 0  | 0  | 2  | 0  | 0  | 3  | 0  | 0  | 3  |
| 0.91    | 1  | 1  | 1  | 3  | 4  | 0  | 3  | 4  | 0  |
| 0.76    | 2  | 1  | 0  | 3  | 13 | 0  | 3  | 28 | 0  |
| 0.46    | 2  | 2  | 0  | 3  | 28 | 0  | 3  | 28 | 0  |
| 0.00    | 2  | 5  | 0  | 3  | 52 | 0  | 3  | 52 | 0  |

Model 3

- (GT) covid symptoms
- (GT) Acute bronchitis
- (GT) Ageusia
- (GT) Anosmia
- (GT) Asthma
- (GT) Bronchitis

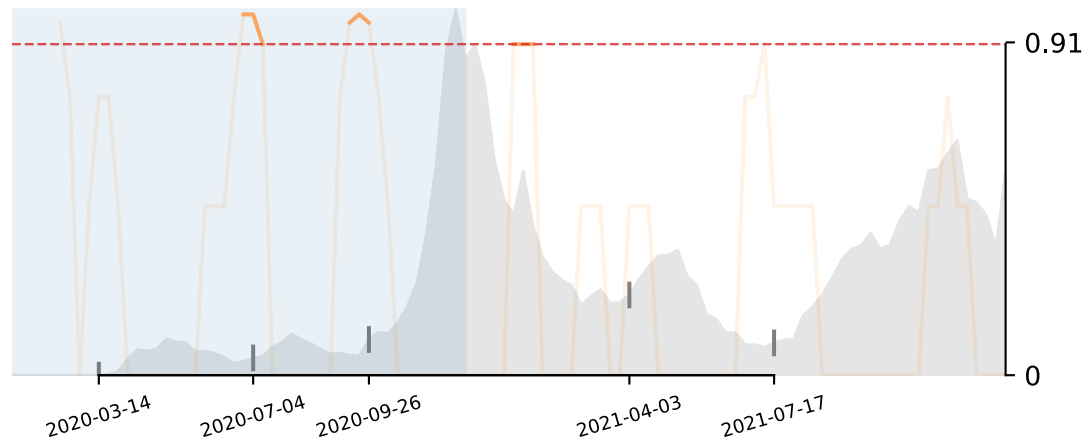

| $\beta$ | tp |    |    | fp |    |    | fn |    |    |
|---------|----|----|----|----|----|----|----|----|----|
|         | tp | fp | fn | tp | fp | fn | tp | fp | fn |
| 1.00    | 0  | 0  | 3  | 0  | 0  | 2  | 0  | 0  | 2  |
| 0.99    | 0  | 0  | 3  | 0  | 0  | 2  | 0  | 0  | 2  |
| 0.96    | 2  | 0  | 1  | 0  | 0  | 2  | 0  | 0  | 2  |
| 0.91    | 3  | 0  | 0  | 1  | 3  | 1  | 1  | 3  | 1  |
| 0.76    | 3  | 1  | 0  | 1  | 4  | 1  | 2  | 14 | 0  |
| 0.46    | 3  | 3  | 0  | 2  | 14 | 0  | 2  | 14 | 0  |
| 0.00    | 3  | 6  | 0  | 2  | 42 | 0  | 2  | 42 | 0  |

## Proxies selected by the Multiple Sources method

Model 1

- (GT) covid
- (GT) how long does covid last
- (GT) covid-19
- (GT) chest pain
- (GT) covid symptoms
- (GT) covid-19 who

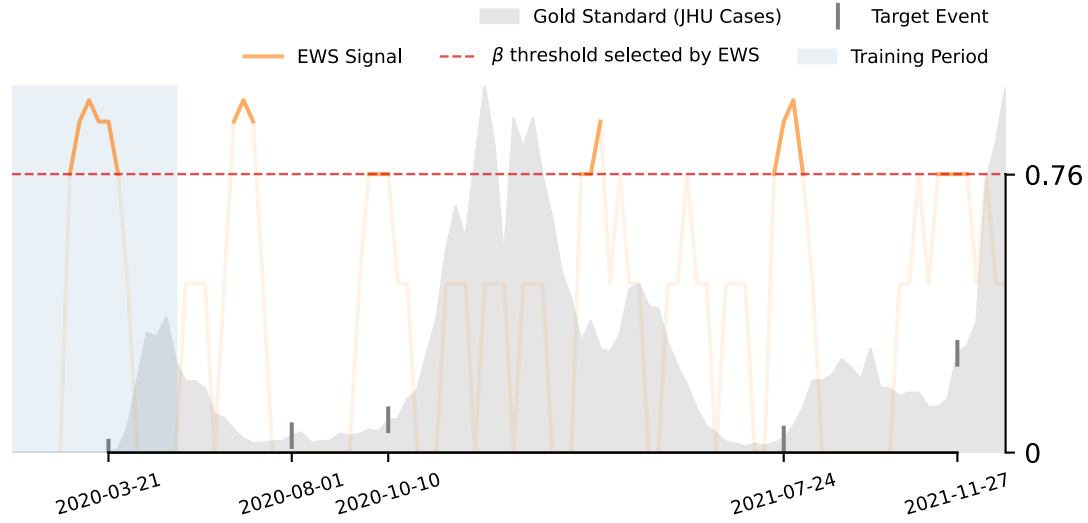

Model 2

- (GT) covid
- (GT) covid-19
- (GT) chest pain
- (GT) Acute bronchitis
- (GT) Ageusia
- (GT) Bronchitis

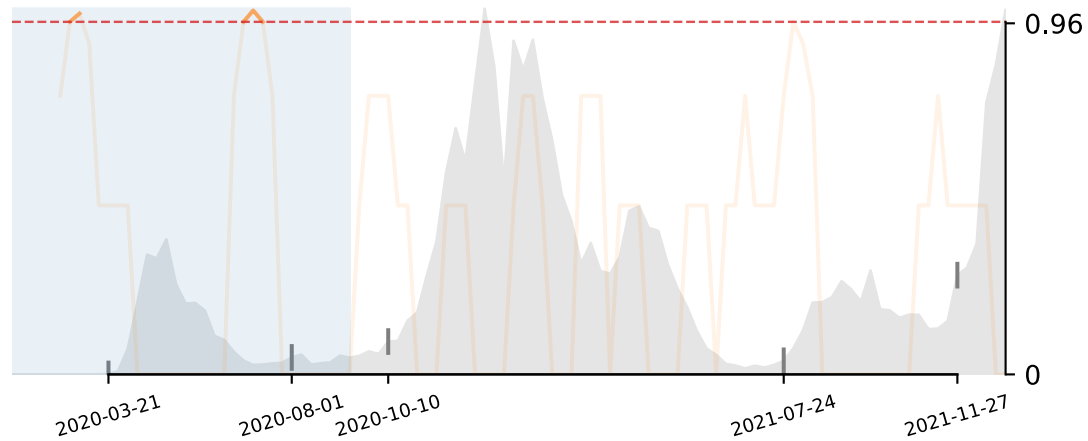

Model 3

- (GT) covid
- (GT) Asthma
- (GT) covid-19
- (GT) chest pain
- (GT) Chest pain
- (GT) Shortness of breath

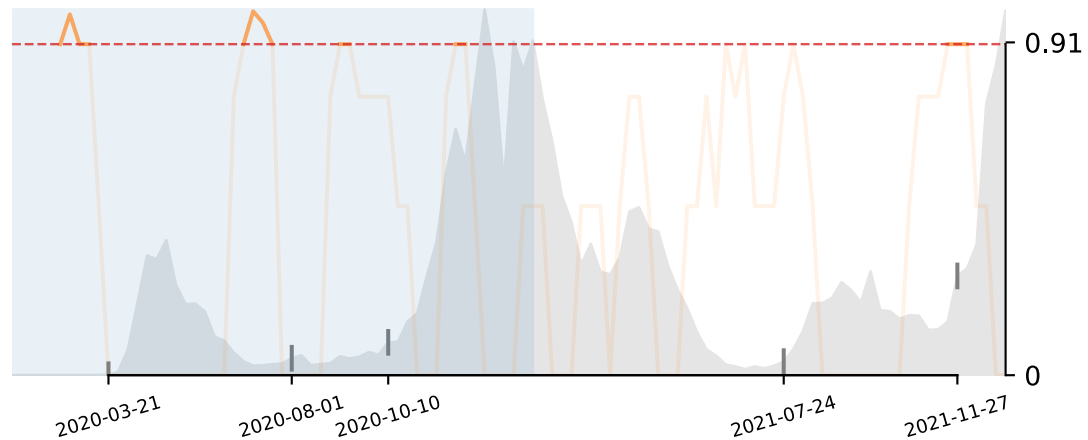

## Performance as a function of $\beta$

| $\beta$ | Training |    |    | Out of sample |    |    |
|---------|----------|----|----|---------------|----|----|
|         | tp       | fp | fn | tp            | fp | fn |
| 1.00    | 0        | 0  | 1  | 0             | 0  | 4  |
| 0.99    | 0        | 0  | 1  | 0             | 0  | 4  |
| 0.96    | 0        | 0  | 1  | 1             | 1  | 2  |
| 0.91    | 1        | 0  | 0  | 2             | 2  | 2  |
| 0.76    | 1        | 0  | 0  | 4             | 9  | 0  |
| 0.46    | 1        | 1  | 0  | 4             | 35 | 0  |
| 0.00    | 1        | 2  | 0  | 4             | 58 | 0  |

| $\beta$ | tp fp fn |   |   | tp fp fn |    |   |
|---------|----------|---|---|----------|----|---|
|         | 1.00     | 0 | 0 | 2        | 0  | 0 |
| 0.99    | 1        | 0 | 1 | 0        | 0  | 3 |
| 0.96    | 2        | 0 | 0 | 0        | 1  | 2 |
| 0.91    | 2        | 1 | 0 | 0        | 2  | 2 |
| 0.76    | 2        | 1 | 0 | 3        | 8  | 0 |
| 0.46    | 2        | 3 | 0 | 3        | 24 | 0 |
| 0.00    | 2        | 5 | 0 | 3        | 50 | 0 |

| $\beta$ | tp fp fn |    |   | tp fp fn |    |   |
|---------|----------|----|---|----------|----|---|
|         | 1.00     | 0  | 0 | 3        | 0  | 0 |
| 0.99    | 1        | 0  | 2 | 0        | 0  | 2 |
| 0.96    | 2        | 0  | 1 | 0        | 0  | 2 |
| 0.91    | 2        | 0  | 1 | 2        | 2  | 0 |
| 0.76    | 3        | 5  | 0 | 2        | 6  | 0 |
| 0.46    | 3        | 8  | 0 | 2        | 18 | 0 |
| 0.00    | 3        | 13 | 0 | 2        | 35 | 0 |

## Proxies selected by the Multiple Sources method

Model 1

- (GT) covid
- (GT) covid-19
- (GT) covid symptoms
- (GT) quarantine
- (GT) fever
- (GT) Acute bronchitis

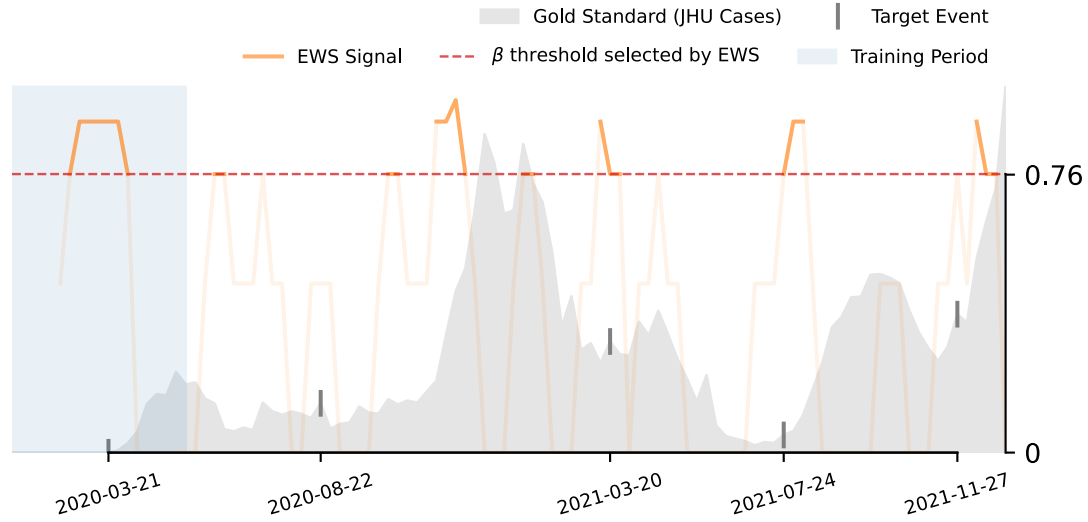

## Performance as a function of $\beta$

| $\beta$ | Training |    |    | Out of sample |    |    |
|---------|----------|----|----|---------------|----|----|
|         | tp       | fp | fn | tp            | fp | fn |
| 1.00    | 0        | 0  | 1  | 0             | 0  | 4  |
| 0.99    | 0        | 0  | 1  | 0             | 0  | 4  |
| 0.96    | 0        | 0  | 1  | 0             | 1  | 4  |
| 0.91    | 0        | 0  | 1  | 1             | 6  | 1  |
| 0.76    | 1        | 1  | 0  | 4             | 17 | 0  |
| 0.46    | 1        | 2  | 0  | 4             | 37 | 0  |
| 0.00    | 1        | 3  | 0  | 4             | 57 | 0  |

Model 2

- (GT) quarantine
- (GT) Throat irritation
- (GT) Bronchitis
- (GT) Wheeze
- (GT) covid symptoms

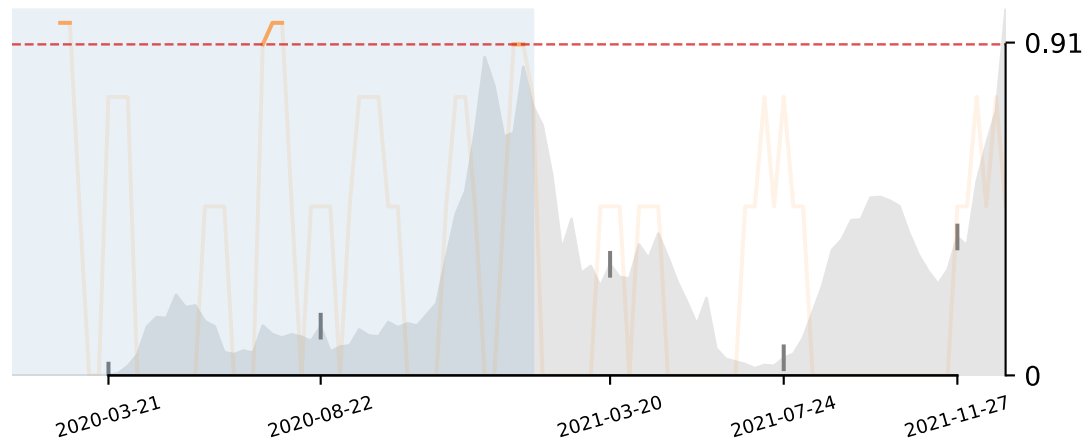

| $\beta$ | tp fp fn |    |   | tp fp fn |    |   |
|---------|----------|----|---|----------|----|---|
|         | 0.99     | 0  | 0 | 2        | 0  | 0 |
| 0.96    | 0        | 0  | 2 | 0        | 0  | 3 |
| 0.91    | 2        | 2  | 0 | 0        | 0  | 3 |
| 0.76    | 2        | 5  | 0 | 1        | 2  | 1 |
| 0.46    | 2        | 13 | 0 | 3        | 11 | 0 |
| 0.00    | 2        | 23 | 0 | 3        | 28 | 0 |

Model 3

- (GT) quarantine
- (JHU) cases
- (GT) Throat irritation
- (GT) covid
- (GT) Acute bronchitis
- (GT) Bronchitis

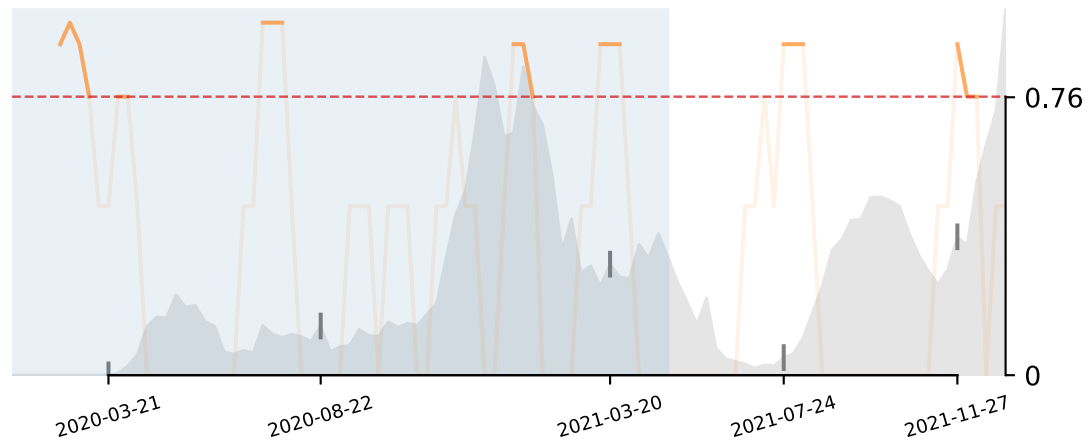

| $\beta$ | tp fp fn |    |   | tp fp fn |    |   |
|---------|----------|----|---|----------|----|---|
|         | 1.00     | 0  | 0 | 3        | 0  | 0 |
| 0.99    | 0        | 0  | 3 | 0        | 0  | 2 |
| 0.96    | 0        | 0  | 3 | 0        | 0  | 2 |
| 0.91    | 2        | 2  | 1 | 2        | 2  | 0 |
| 0.76    | 3        | 6  | 0 | 2        | 4  | 0 |
| 0.46    | 3        | 10 | 0 | 2        | 7  | 0 |
| 0.00    | 3        | 25 | 0 | 2        | 21 | 0 |

## Proxies selected by the Multiple Sources method

Model 1

- (GT) covid
- (GT) how long does covid last
- (GT) covid-19
- (GT) loss taste
- (GT) chest pain
- (GT) covid symptoms

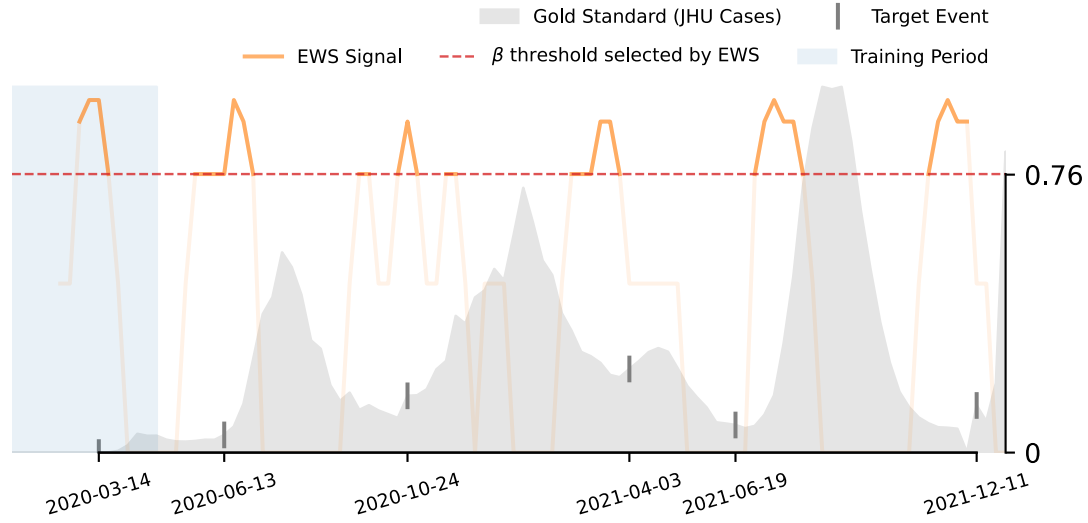

Model 2

- (GT) how long does covid last
- (GT) loss taste
- (GT) chest pain
- (GT) covid symptoms
- (GT) chest tightness
- (GT) Ageusia

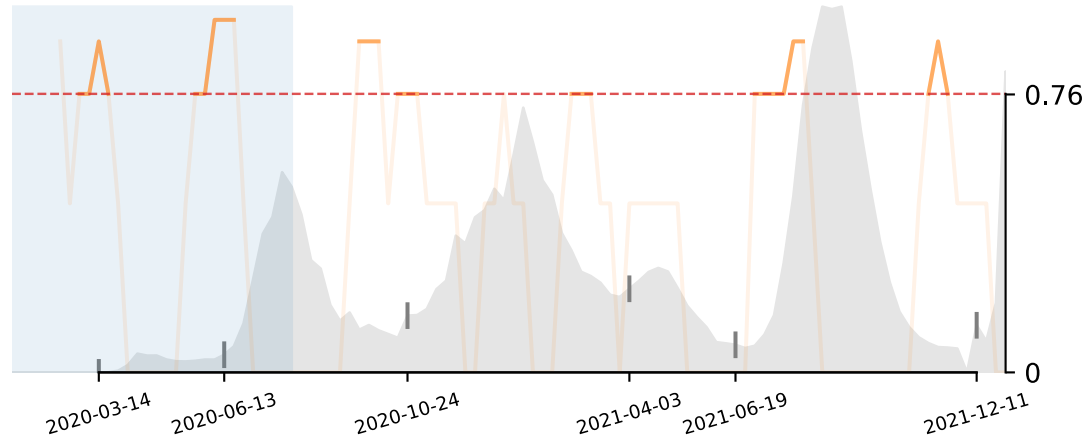

Model 3

- (GT) how long does covid last
- (GT) loss taste
- (GT) Ageusia
- (GT) Shortness of breath
- (GT) chest pain
- (GT) covid symptoms

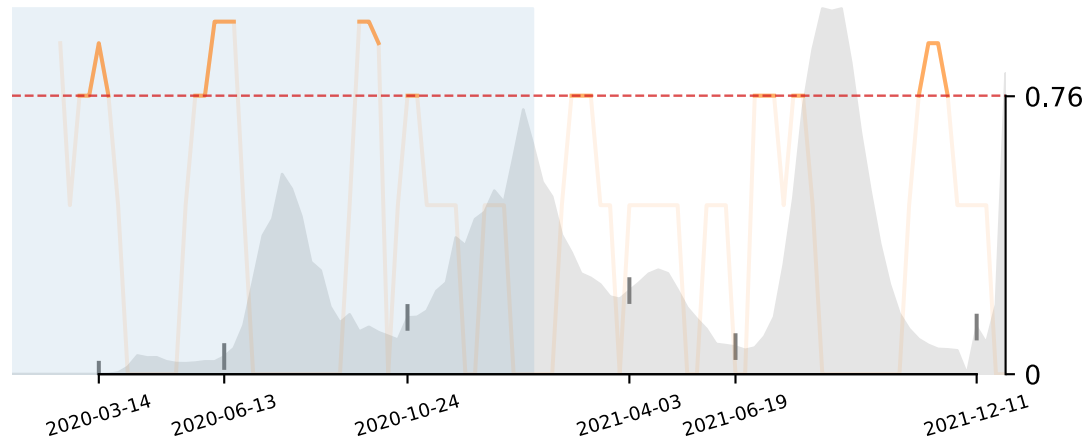

## Performance as a function of $\beta$

| $\beta$ | Training |    |    | Out of sample |    |    |
|---------|----------|----|----|---------------|----|----|
|         | tp       | fp | fn | tp            | fp | fn |
| 1.00    | 0        | 0  | 1  | 0             | 0  | 5  |
| 0.99    | 0        | 0  | 1  | 0             | 0  | 5  |
| 0.96    | 0        | 0  | 1  | 1             | 2  | 3  |
| 0.91    | 1        | 0  | 0  | 3             | 6  | 1  |
| 0.76    | 1        | 0  | 0  | 4             | 12 | 0  |
| 0.46    | 1        | 1  | 0  | 5             | 25 | 0  |
| 0.00    | 1        | 2  | 0  | 5             | 53 | 0  |

| $\beta$ | tp fp fn |   |   | tp fp fn |    |   |
|---------|----------|---|---|----------|----|---|
|         | 1.00     | 0 | 0 | 2        | 0  | 0 |
| 0.99    | 0        | 0 | 2 | 0        | 0  | 4 |
| 0.96    | 0        | 0 | 2 | 0        | 0  | 4 |
| 0.91    | 1        | 1 | 1 | 2        | 2  | 2 |
| 0.76    | 2        | 1 | 0 | 3        | 8  | 0 |
| 0.46    | 2        | 2 | 0 | 4        | 23 | 0 |
| 0.00    | 2        | 4 | 0 | 4        | 46 | 0 |

| $\beta$ | tp fp fn |    |   | tp fp fn |    |   |
|---------|----------|----|---|----------|----|---|
|         | 1.00     | 0  | 0 | 3        | 0  | 0 |
| 0.99    | 0        | 0  | 3 | 0        | 0  | 3 |
| 0.96    | 0        | 0  | 3 | 0        | 0  | 3 |
| 0.91    | 2        | 2  | 1 | 1        | 0  | 2 |
| 0.76    | 3        | 2  | 0 | 2        | 5  | 0 |
| 0.46    | 3        | 4  | 0 | 3        | 14 | 0 |
| 0.00    | 3        | 14 | 0 | 3        | 28 | 0 |

## Proxies selected by the Multiple Sources method

Model 1

- (GT) covid
- (GT) covid-19
- (GT) loss taste
- (GT) chest pain
- (GT) covid symptoms
- (GT) chest tightness

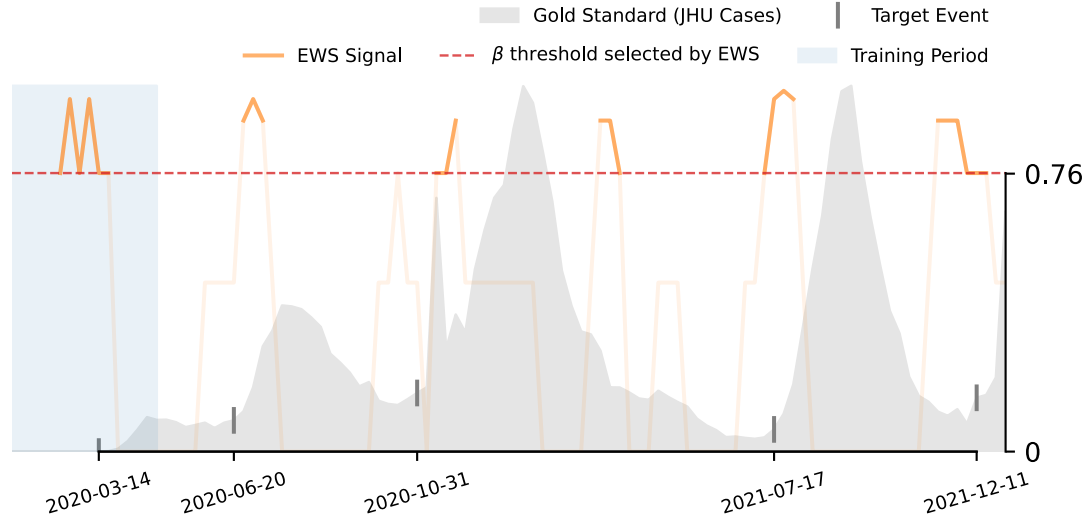

Model 2

- (GT) chest pain
- (GT) covid symptoms
- (GT) fever
- (GT) Ageusia
- (GT) Anosmia
- (GT) Asthma

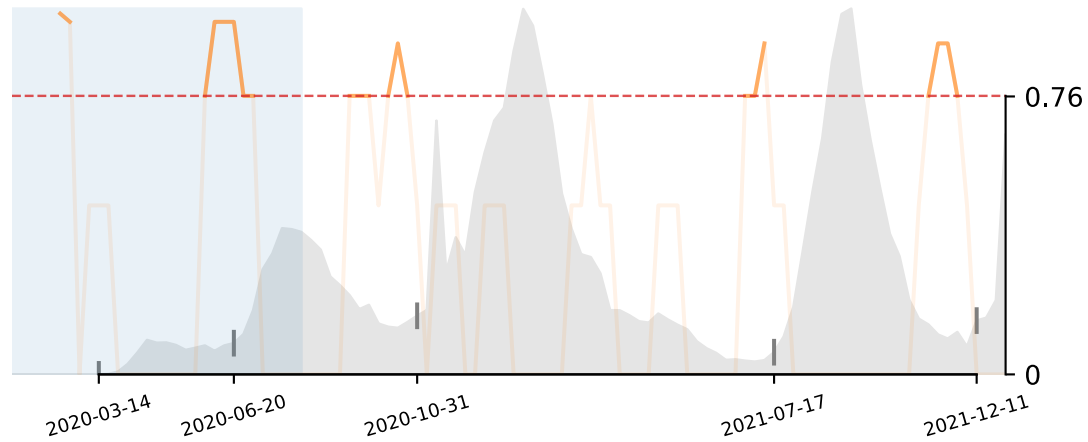

Model 3

- (GT) fever
- (GT) Ageusia
- (GT) Chills
- (GT) Shortness of breath
- (GT) chest pain
- (GT) Burning Chest Pain

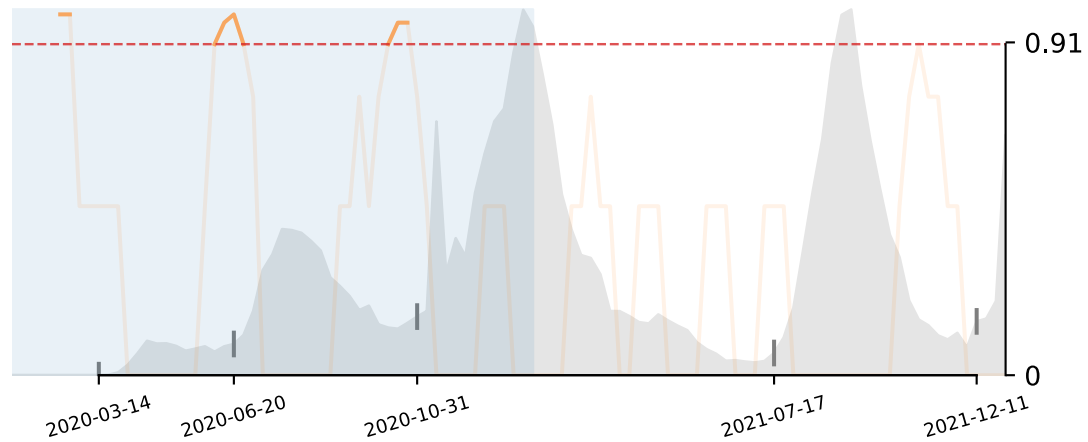

## Performance as a function of $\beta$

| $\beta$ | Training |    |    | Out of sample |    |    |
|---------|----------|----|----|---------------|----|----|
|         | tp       | fp | fn | tp            | fp | fn |
| 1.00    | 0        | 0  | 1  | 0             | 0  | 4  |
| 0.99    | 0        | 0  | 1  | 0             | 1  | 3  |
| 0.96    | 0        | 0  | 1  | 1             | 3  | 2  |
| 0.91    | 1        | 0  | 0  | 2             | 8  | 1  |
| 0.76    | 1        | 0  | 0  | 3             | 12 | 0  |
| 0.46    | 1        | 1  | 0  | 4             | 28 | 0  |
| 0.00    | 1        | 1  | 0  | 4             | 60 | 0  |

| $\beta$ | tp fp fn |   |   | tp fp fn |    |   |
|---------|----------|---|---|----------|----|---|
|         | 1.00     | 0 | 0 | 2        | 0  | 0 |
| 0.99    | 0        | 0 | 2 | 0        | 0  | 3 |
| 0.96    | 1        | 0 | 1 | 0        | 0  | 3 |
| 0.91    | 2        | 0 | 0 | 3        | 0  | 0 |
| 0.76    | 2        | 0 | 0 | 3        | 2  | 0 |
| 0.46    | 2        | 2 | 0 | 3        | 16 | 0 |
| 0.00    | 2        | 3 | 0 | 3        | 52 | 0 |

| $\beta$ | tp fp fn |    |   | tp fp fn |    |   |
|---------|----------|----|---|----------|----|---|
|         | 1.00     | 0  | 0 | 3        | 0  | 0 |
| 0.99    | 0        | 0  | 3 | 0        | 0  | 2 |
| 0.96    | 2        | 0  | 1 | 0        | 0  | 2 |
| 0.91    | 3        | 0  | 0 | 1        | 0  | 1 |
| 0.76    | 3        | 1  | 0 | 1        | 2  | 1 |
| 0.46    | 3        | 3  | 0 | 2        | 12 | 0 |
| 0.00    | 3        | 12 | 0 | 2        | 35 | 0 |

## Proxies selected by the Multiple Sources method

Model 1

- (JHU) cases
- (GT) covid
- (GT) covid-19
- (GT) covid symptoms
- (GT) fever
- (GT) Otitis

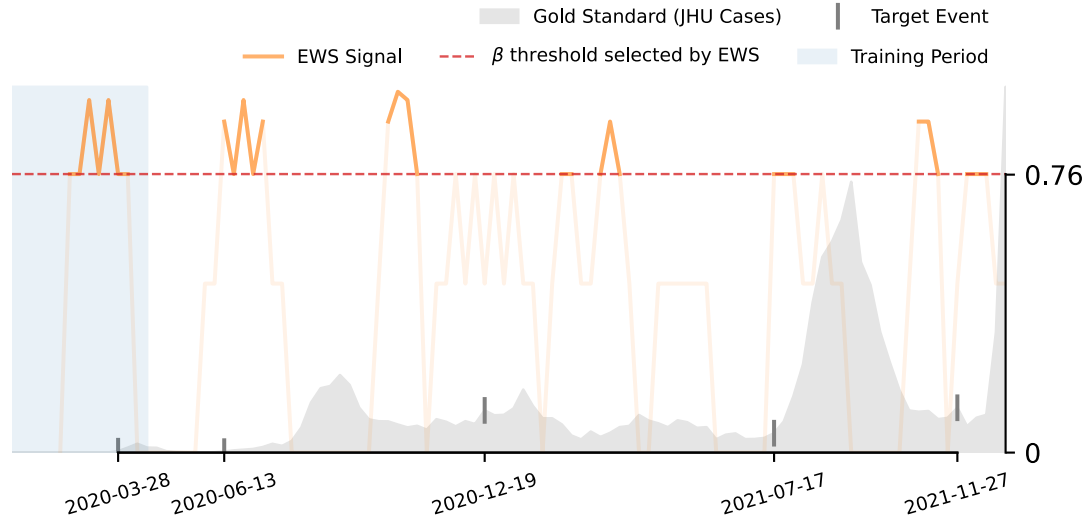

Model 2

- (JHU) cases
- (GT) covid symptoms
- (GT) Otitis

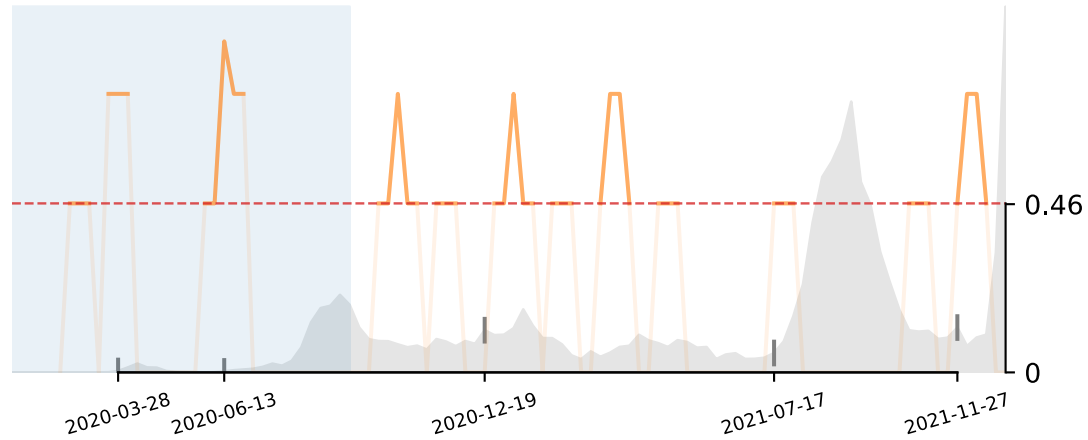

Model 3

- (JHU) cases
- (GT) Vomiting
- (GT) covid-19
- (GT) covid symptoms
- (GT) quarantine
- (GT) fever

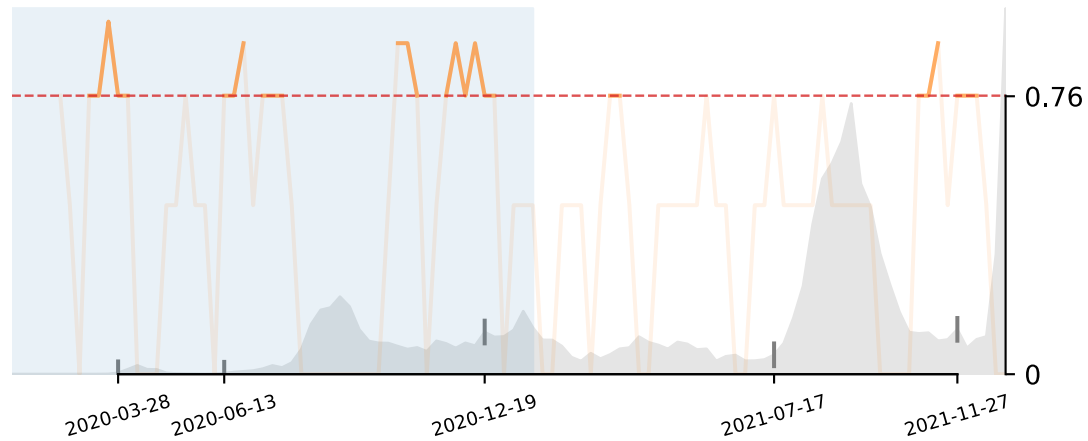

## Performance as a function of $\beta$

| $\beta$ | Training |    |    | Out of sample |    |    |
|---------|----------|----|----|---------------|----|----|
|         | tp       | fp | fn | tp            | fp | fn |
| 1.00    | 0        | 0  | 1  | 0             | 0  | 4  |
| 0.99    | 0        | 0  | 1  | 0             | 1  | 4  |
| 0.96    | 0        | 0  | 1  | 0             | 3  | 3  |
| 0.91    | 1        | 0  | 0  | 2             | 6  | 2  |
| 0.76    | 1        | 0  | 0  | 4             | 21 | 0  |
| 0.46    | 1        | 2  | 0  | 4             | 43 | 0  |
| 0.00    | 1        | 2  | 0  | 4             | 61 | 0  |

| $\beta$ | tp | fp | fn | tp | fp | fn |
|---------|----|----|----|----|----|----|
| 0.91    | 0  | 0  | 2  | 0  | 0  | 3  |
| 0.76    | 1  | 0  | 1  | 0  | 6  | 2  |
| 0.46    | 2  | 3  | 0  | 3  | 25 | 0  |
| 0.00    | 2  | 4  | 0  | 3  | 47 | 0  |

| $\beta$ | tp | fp | fn | tp | fp | fn |
|---------|----|----|----|----|----|----|
| 1.00    | 0  | 0  | 3  | 0  | 0  | 2  |
| 0.99    | 0  | 0  | 3  | 0  | 0  | 2  |
| 0.96    | 0  | 0  | 3  | 0  | 0  | 2  |
| 0.91    | 1  | 0  | 2  | 1  | 0  | 1  |
| 0.76    | 2  | 3  | 1  | 2  | 6  | 0  |
| 0.46    | 3  | 11 | 0  | 2  | 26 | 0  |
| 0.00    | 3  | 21 | 0  | 2  | 35 | 0  |

## Proxies selected by the Multiple Sources method

Model 1

- (JHU) cases
- (GT) covid
- (GT) how long does covid last
- (GT) covid-19
- (GT) quarantine
- (GT) fever

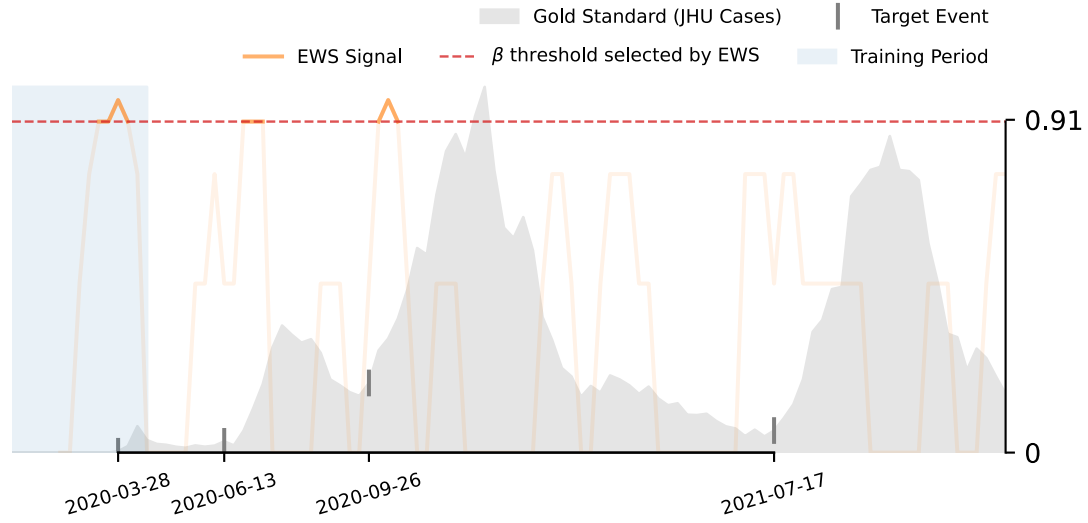

## Performance as a function of $\beta$

| $\beta$ | Training |    |    | Out of sample |    |    |
|---------|----------|----|----|---------------|----|----|
|         | tp       | fp | fn | tp            | fp | fn |
| 1.00    | 0        | 0  | 1  | 0             | 0  | 3  |
| 0.99    | 0        | 0  | 1  | 0             | 0  | 3  |
| 0.96    | 0        | 0  | 1  | 0             | 1  | 2  |
| 0.91    | 1        | 0  | 0  | 0             | 6  | 1  |
| 0.76    | 1        | 1  | 0  | 2             | 15 | 0  |
| 0.46    | 1        | 2  | 0  | 3             | 36 | 0  |
| 0.00    | 1        | 2  | 0  | 3             | 68 | 0  |

Model 2

- (JHU) cases
- (GT) covid-19
- (GT) Chest pain
- (GT) Chills
- (GT) Otitis

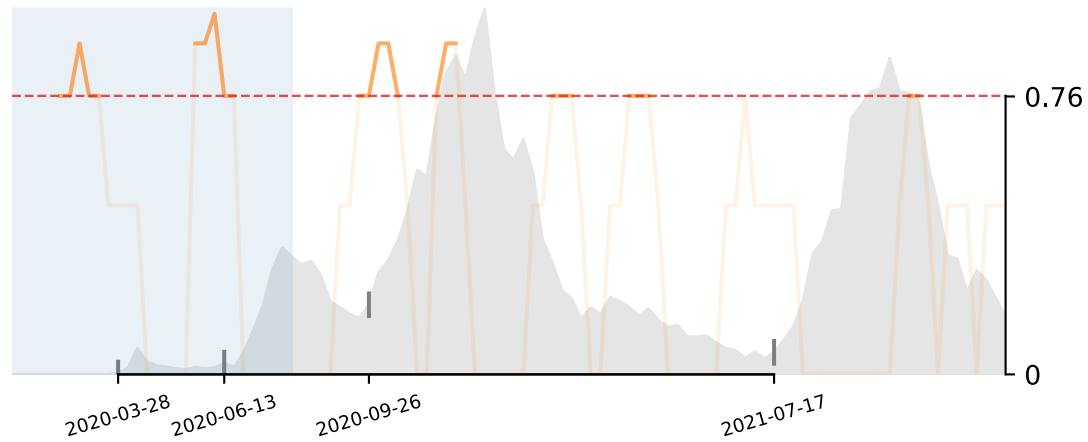

| $\beta$ | tp fp fn |   |   | tp fp fn |    |   |
|---------|----------|---|---|----------|----|---|
|         | 0.99     | 0 | 0 | 2        | 0  | 0 |
| 0.96    | 1        | 0 | 1 | 0        | 0  | 2 |
| 0.91    | 1        | 0 | 1 | 0        | 4  | 1 |
| 0.76    | 2        | 0 | 0 | 2        | 14 | 0 |
| 0.46    | 2        | 3 | 0 | 2        | 32 | 0 |
| 0.00    | 2        | 5 | 0 | 2        | 60 | 0 |

Model 3

- (JHU) cases
- (GT) Chest pain
- (GT) Chills
- (GT) covid-19
- (GT) covid symptoms
- (GT) fever

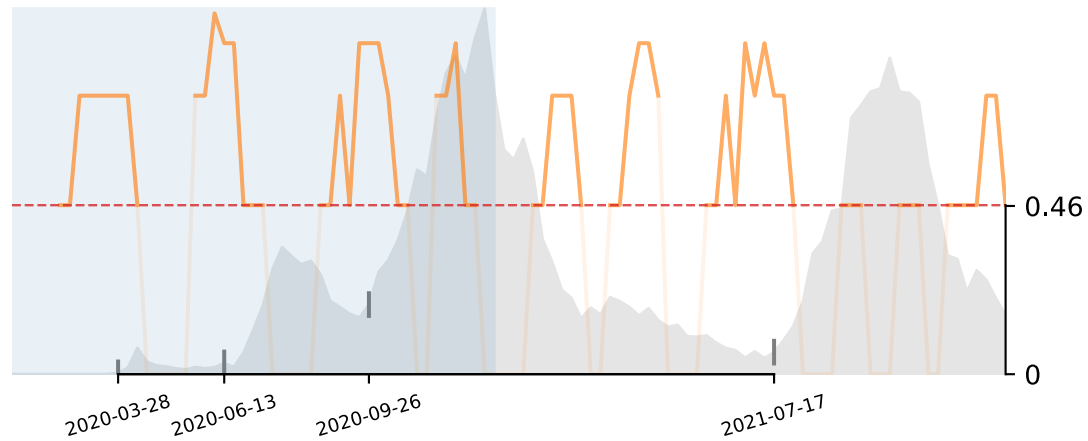

| $\beta$ | tp fp fn |    |   | tp fp fn |    |   |
|---------|----------|----|---|----------|----|---|
|         | 1.00     | 0  | 0 | 3        | 0  | 0 |
| 0.99    | 0        | 0  | 3 | 0        | 0  | 1 |
| 0.96    | 1        | 0  | 2 | 0        | 0  | 1 |
| 0.91    | 1        | 0  | 2 | 1        | 2  | 0 |
| 0.76    | 2        | 3  | 1 | 1        | 10 | 0 |
| 0.46    | 3        | 7  | 0 | 1        | 28 | 0 |
| 0.00    | 3        | 18 | 0 | 1        | 46 | 0 |

## Proxies selected by the Multiple Sources method

Model 1

- (JHU) cases
- (GT) covid
- (GT) how long does covid last
- (GT) covid-19
- (GT) covid symptoms
- (GT) chest tightness

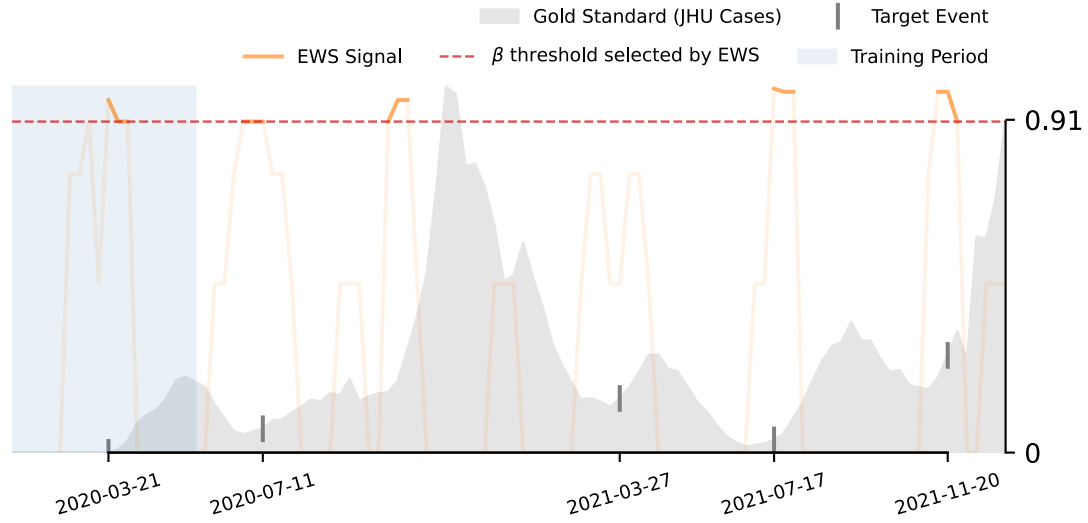

Model 2

- (JHU) cases
- (GT) Anosmia
- (GT) Nasal congestion
- (GT) Viral pneumonia
- (GT) covid
- (GT) how long does covid last

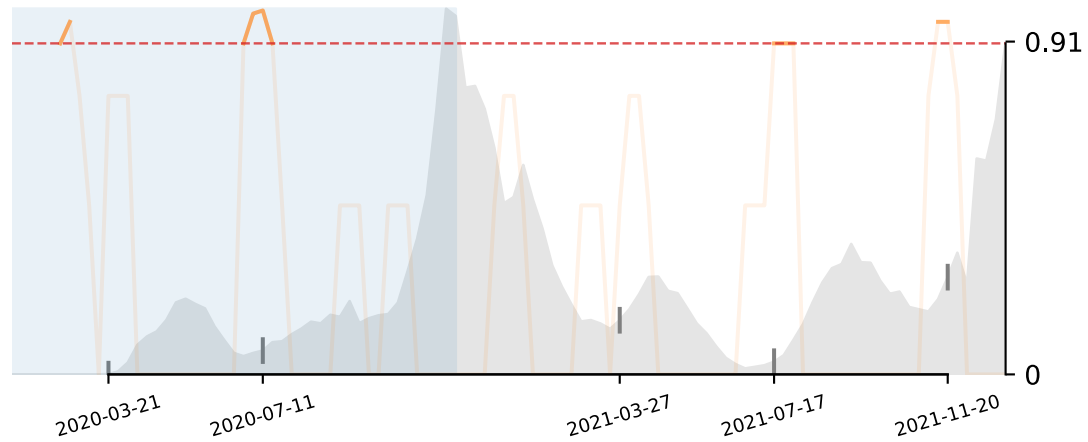

Model 3

- (GT) how long does covid last
- (GT) covid symptoms
- (GT) Hyperventilation
- (GT) Nasal congestion
- (GT) Acute bronchitis
- (GT) Cough

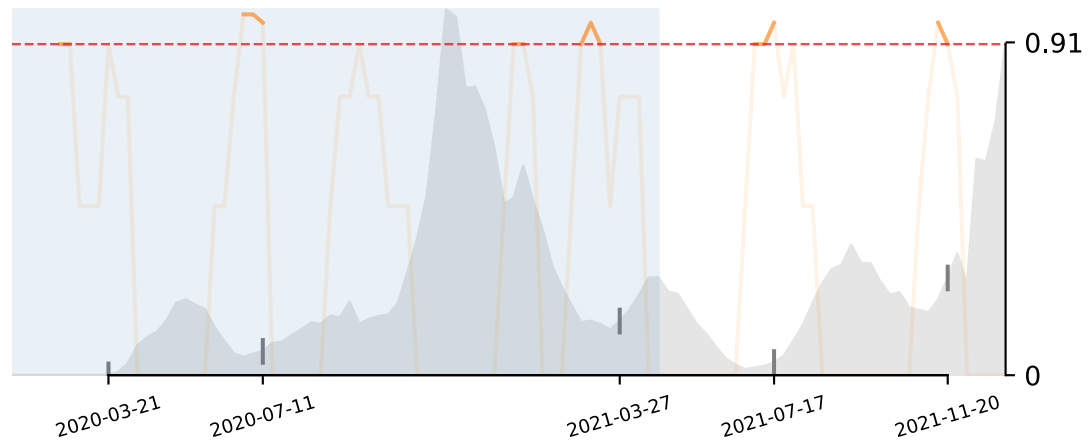

## Performance as a function of $\beta$

| $\beta$ | Training |    |    | Out of sample |    |    |
|---------|----------|----|----|---------------|----|----|
|         | tp       | fp | fn | tp            | fp | fn |
| 1.00    | 0        | 0  | 1  | 1             | 0  | 3  |
| 0.99    | 0        | 0  | 1  | 2             | 2  | 2  |
| 0.96    | 0        | 0  | 1  | 2             | 4  | 2  |
| 0.91    | 1        | 0  | 0  | 3             | 6  | 1  |
| 0.76    | 1        | 2  | 0  | 4             | 10 | 0  |
| 0.46    | 1        | 2  | 0  | 4             | 22 | 0  |
| 0.00    | 1        | 2  | 0  | 4             | 56 | 0  |

| $\beta$ | tp fp fn |    |   | tp fp fn |    |   |
|---------|----------|----|---|----------|----|---|
|         | 1.00     | 0  | 0 | 2        | 0  | 0 |
| 0.99    | 1        | 0  | 1 | 0        | 0  | 3 |
| 0.96    | 1        | 0  | 1 | 1        | 0  | 2 |
| 0.91    | 2        | 0  | 0 | 2        | 2  | 1 |
| 0.76    | 2        | 2  | 0 | 2        | 7  | 0 |
| 0.46    | 2        | 4  | 0 | 3        | 10 | 0 |
| 0.00    | 2        | 11 | 0 | 3        | 36 | 0 |

| $\beta$ | tp fp fn |    |   | tp fp fn |    |   |
|---------|----------|----|---|----------|----|---|
|         | 1.00     | 0  | 0 | 3        | 0  | 0 |
| 0.99    | 0        | 0  | 3 | 0        | 0  | 2 |
| 0.96    | 1        | 0  | 2 | 2        | 0  | 0 |
| 0.91    | 2        | 0  | 1 | 2        | 1  | 0 |
| 0.76    | 3        | 4  | 0 | 2        | 3  | 0 |
| 0.46    | 3        | 13 | 0 | 2        | 5  | 0 |
| 0.00    | 3        | 20 | 0 | 2        | 22 | 0 |



## Proxies selected by the Multiple Sources method

Model 1

- (JHU) cases
- (GT) covid
- (GT) covid-19
- (GT) covid symptoms
- (GT) chest tightness
- (GT) covid-19 who

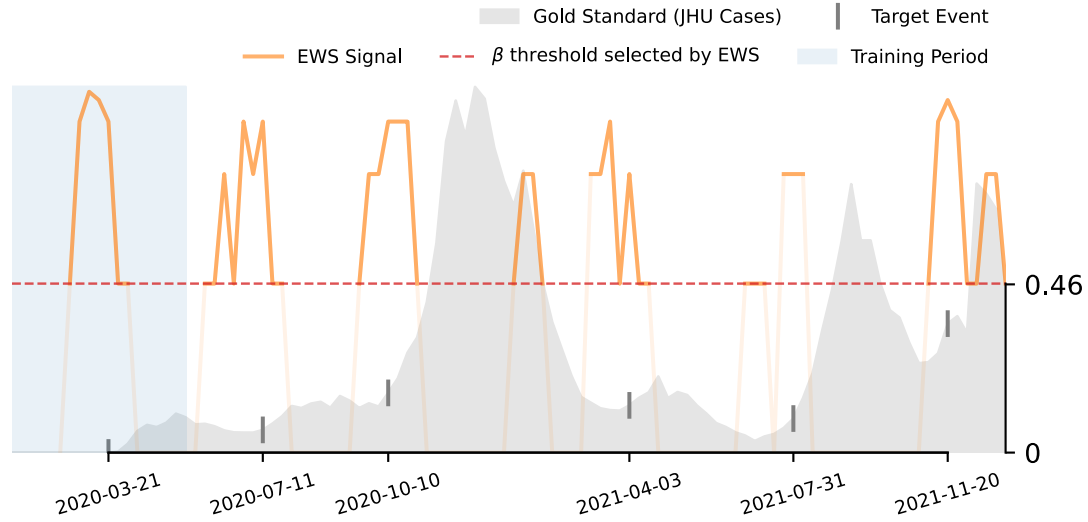

## Performance as a function of $\beta$

| $\beta$ | Training |    |    | Out of sample |    |    |
|---------|----------|----|----|---------------|----|----|
|         | tp       | fp | fn | tp            | fp | fn |
| 1.00    | 0        | 0  | 1  | 0             | 0  | 5  |
| 0.99    | 0        | 0  | 1  | 0             | 0  | 5  |
| 0.96    | 1        | 0  | 0  | 1             | 0  | 4  |
| 0.91    | 1        | 0  | 0  | 4             | 3  | 1  |
| 0.76    | 1        | 0  | 0  | 5             | 8  | 0  |
| 0.46    | 1        | 0  | 0  | 5             | 18 | 0  |
| 0.00    | 1        | 2  | 0  | 5             | 50 | 0  |

Model 2

- (JHU) cases
- (GT) covid
- (GT) covid-19
- (GT) covid symptoms
- (GT) chest tightness
- (GT) fever

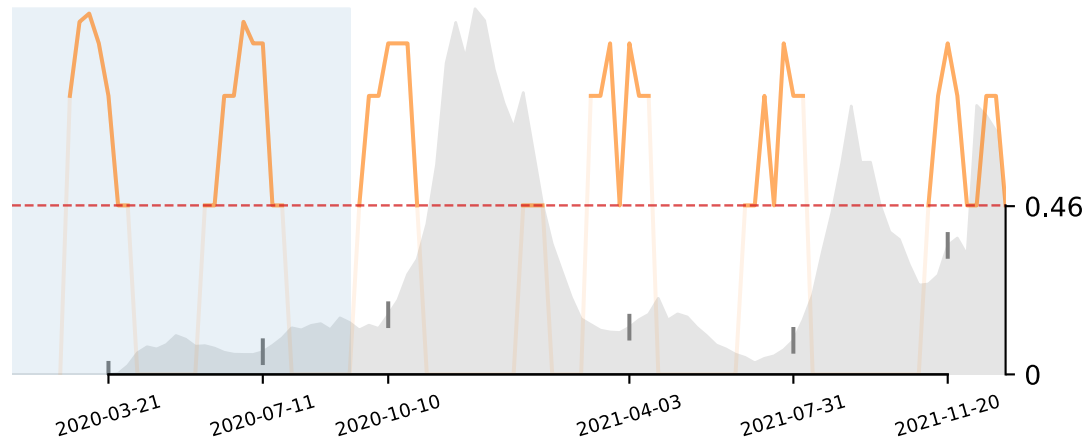

| $\beta$ | tp fp fn |   |   | tp fp fn |    |   |
|---------|----------|---|---|----------|----|---|
|         | 1.00     | 0 | 0 | 2        | 0  | 0 |
| 0.99    | 0        | 0 | 2 | 0        | 0  | 4 |
| 0.96    | 1        | 0 | 1 | 0        | 0  | 4 |
| 0.91    | 2        | 0 | 0 | 4        | 2  | 0 |
| 0.76    | 2        | 0 | 0 | 4        | 8  | 0 |
| 0.46    | 2        | 0 | 0 | 4        | 15 | 0 |
| 0.00    | 2        | 6 | 0 | 4        | 43 | 0 |

Model 3

- (JHU) cases
- (GT) covid
- (GT) covid symptoms
- (GT) chest tightness
- (GT) Acute bronchitis
- (GT) Ageusia

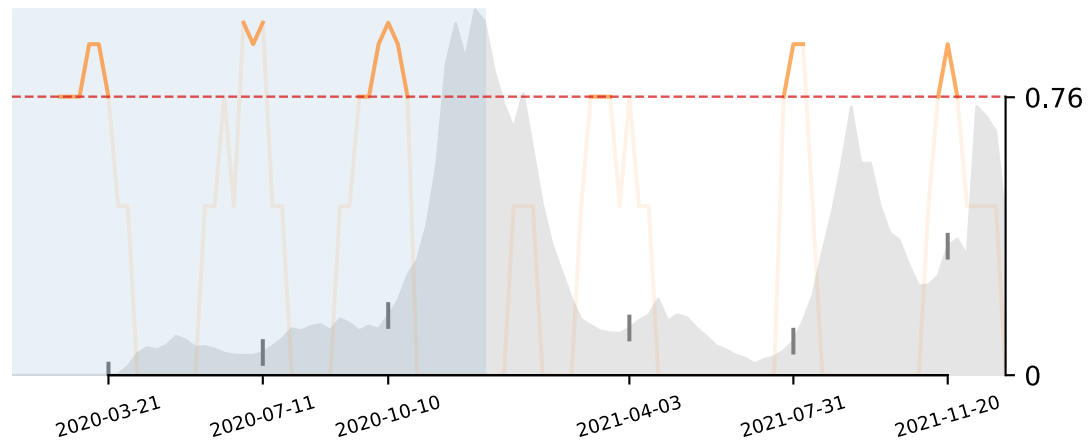

| $\beta$ | tp fp fn |    |   | tp fp fn |    |   |
|---------|----------|----|---|----------|----|---|
|         | 1.00     | 0  | 0 | 3        | 0  | 0 |
| 0.99    | 0        | 0  | 3 | 0        | 0  | 3 |
| 0.96    | 0        | 0  | 3 | 0        | 0  | 3 |
| 0.91    | 2        | 0  | 1 | 2        | 1  | 1 |
| 0.76    | 3        | 1  | 0 | 3        | 2  | 0 |
| 0.46    | 3        | 3  | 0 | 3        | 12 | 0 |
| 0.00    | 3        | 10 | 0 | 3        | 33 | 0 |

## Proxies selected by the Multiple Sources method

Model 1

- (GT) covid
- (GT) how long does covid last
- (GT) covid-19
- (GT) covid symptoms
- (GT) fever
- (GT) Acute bronchitis

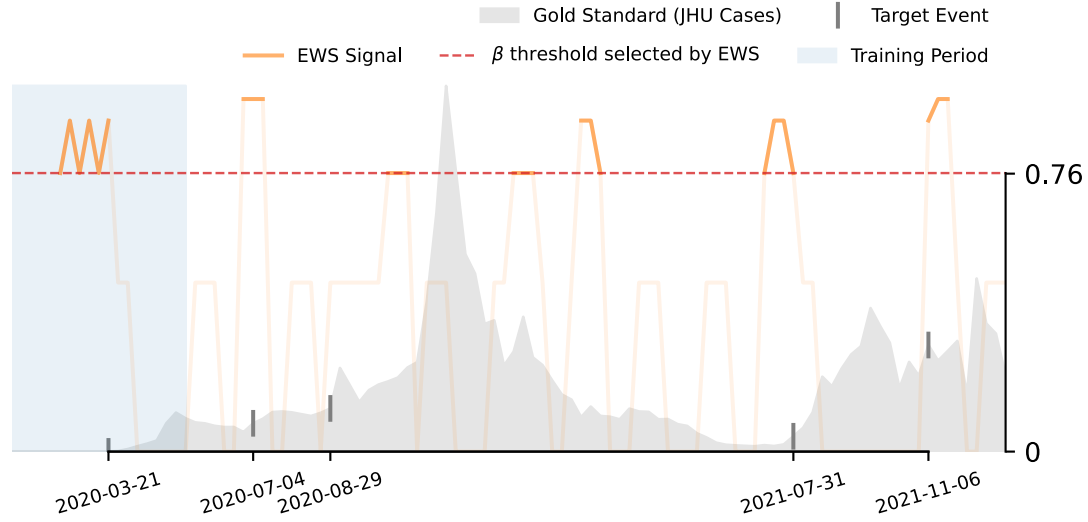

Model 2

- (GT) covid
- (GT) covid-19
- (GT) covid symptoms
- (GT) fever
- (GT) Acute bronchitis
- (GT) Asthma

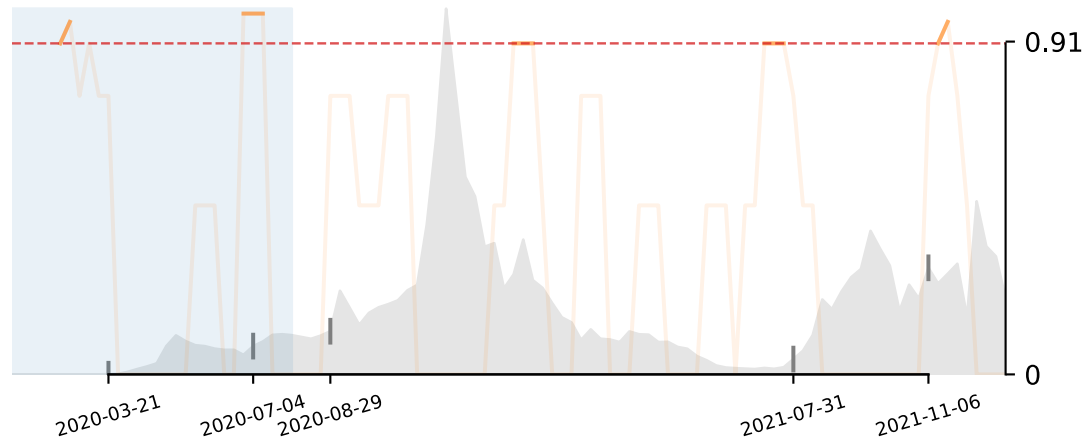

Model 3

- (GT) covid symptoms
- (GT) Asthma
- Twitter (state level signal)
- (GT) Acute bronchitis
- (GT) Anosmia
- (GT) Nasal congestion

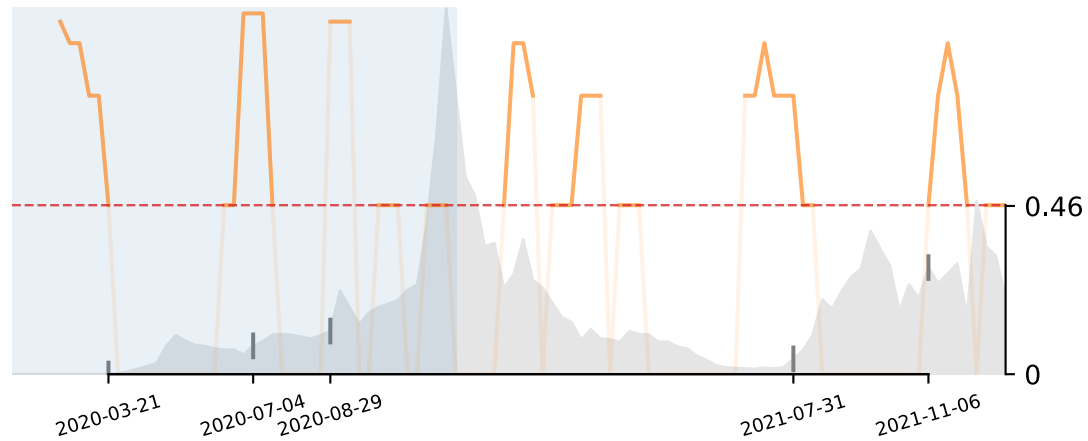

## Performance as a function of $\beta$

| $\beta$ | Training |    |    | Out of sample |    |    |
|---------|----------|----|----|---------------|----|----|
|         | tp       | fp | fn | tp            | fp | fn |
| 1.00    | 0        | 0  | 1  | 0             | 0  | 4  |
| 0.99    | 0        | 0  | 1  | 0             | 0  | 4  |
| 0.96    | 0        | 0  | 1  | 1             | 3  | 2  |
| 0.91    | 0        | 0  | 1  | 3             | 5  | 1  |
| 0.76    | 1        | 0  | 0  | 3             | 12 | 1  |
| 0.46    | 1        | 1  | 0  | 4             | 36 | 0  |
| 0.00    | 1        | 3  | 0  | 4             | 57 | 0  |

| $\beta$ | tp |    |    | fp |    |    | fn |    |    |
|---------|----|----|----|----|----|----|----|----|----|
|         | tp | fp | fn | tp | fp | fn | tp | fp | fn |
| 1.00    | 0  | 0  | 2  | 0  | 0  | 3  | 0  | 0  | 3  |
| 0.99    | 0  | 0  | 2  | 0  | 0  | 3  | 0  | 0  | 3  |
| 0.96    | 1  | 1  | 1  | 0  | 1  | 2  | 0  | 1  | 2  |
| 0.91    | 2  | 1  | 0  | 1  | 5  | 1  | 1  | 5  | 1  |
| 0.76    | 2  | 2  | 0  | 3  | 14 | 0  | 3  | 14 | 0  |
| 0.46    | 2  | 2  | 0  | 3  | 29 | 0  | 3  | 29 | 0  |
| 0.00    | 2  | 4  | 0  | 3  | 56 | 0  | 3  | 56 | 0  |

| $\beta$ | tp |    |    | fp |    |    | fn |    |    |
|---------|----|----|----|----|----|----|----|----|----|
|         | tp | fp | fn | tp | fp | fn | tp | fp | fn |
| 1.00    | 0  | 0  | 3  | 0  | 0  | 2  | 0  | 0  | 2  |
| 0.99    | 0  | 0  | 3  | 0  | 0  | 2  | 0  | 0  | 2  |
| 0.96    | 1  | 1  | 2  | 0  | 0  | 2  | 0  | 0  | 2  |
| 0.91    | 2  | 4  | 1  | 1  | 3  | 0  | 1  | 3  | 0  |
| 0.76    | 3  | 4  | 0  | 1  | 9  | 0  | 2  | 22 | 0  |
| 0.46    | 3  | 4  | 0  | 2  | 22 | 0  | 2  | 22 | 0  |
| 0.00    | 3  | 11 | 0  | 2  | 43 | 0  | 2  | 43 | 0  |

## Proxies selected by the Multiple Sources method

Model 1

- (GT) covid
- (GT) covid-19
- (GT) covid symptoms
- (GT) quarantine
- (GT) Acute bronchitis
- (GT) Bronchitis

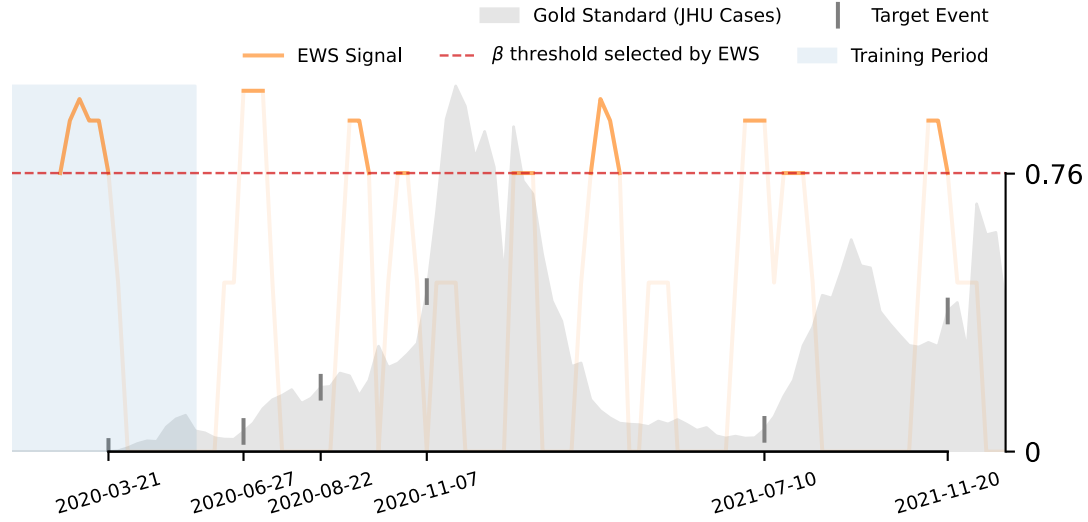

Model 2

- (GT) covid
- (GT) covid-19
- (GT) covid symptoms
- (GT) quarantine
- (GT) Acute bronchitis
- (GT) Chest pain

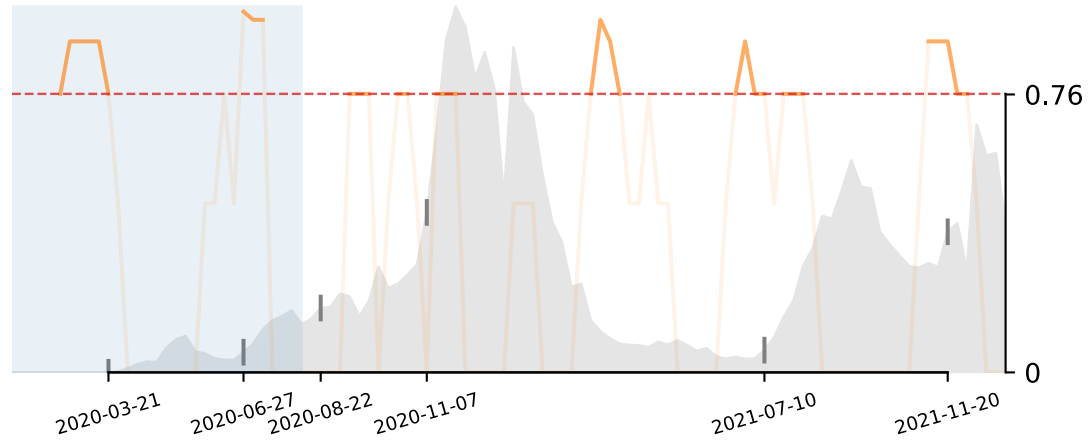

Model 3

- (GT) Wheeze
- (GT) covid-19
- (GT) quarantine
- (GT) Chest pain
- (GT) Nasal congestion
- (GT) covid

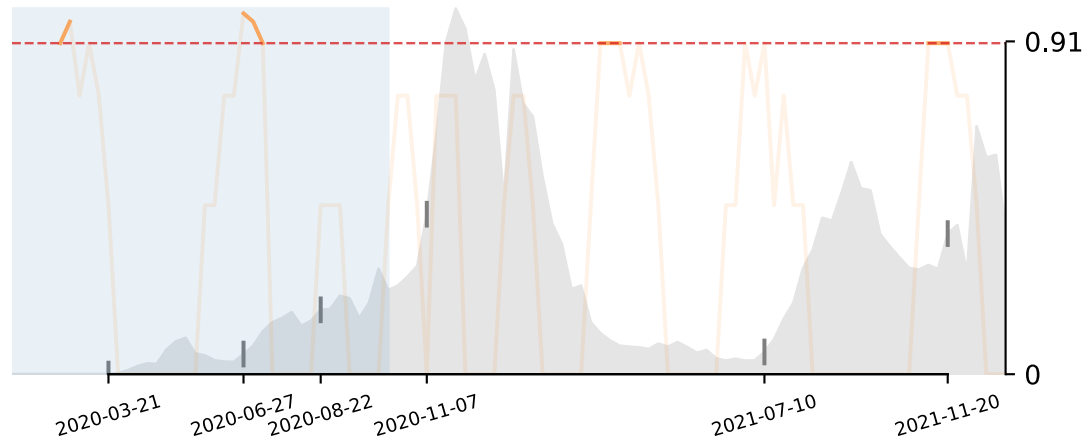

## Performance as a function of $\beta$

| $\beta$ | Training |    |    | Out of sample |    |    |
|---------|----------|----|----|---------------|----|----|
|         | tp       | fp | fn | tp            | fp | fn |
| 1.00    | 0        | 0  | 1  | 0             | 0  | 5  |
| 0.99    | 0        | 0  | 1  | 2             | 1  | 3  |
| 0.96    | 0        | 0  | 1  | 2             | 2  | 3  |
| 0.91    | 1        | 0  | 0  | 4             | 5  | 1  |
| 0.76    | 1        | 0  | 0  | 5             | 13 | 0  |
| 0.46    | 1        | 1  | 0  | 5             | 26 | 0  |
| 0.00    | 1        | 2  | 0  | 5             | 51 | 0  |

| $\beta$ | tp fp fn |   |   | tp fp fn |    |   |
|---------|----------|---|---|----------|----|---|
|         | 1.00     | 0 | 0 | 2        | 0  | 0 |
| 0.99    | 0        | 0 | 2 | 0        | 0  | 4 |
| 0.96    | 1        | 0 | 1 | 0        | 1  | 4 |
| 0.91    | 1        | 2 | 1 | 2        | 2  | 2 |
| 0.76    | 2        | 2 | 0 | 3        | 15 | 1 |
| 0.46    | 2        | 3 | 0 | 3        | 26 | 1 |
| 0.00    | 2        | 4 | 0 | 4        | 50 | 0 |

| $\beta$ | tp fp fn |   |   | tp fp fn |    |   |
|---------|----------|---|---|----------|----|---|
|         | 1.00     | 0 | 0 | 3        | 0  | 0 |
| 0.99    | 0        | 0 | 3 | 0        | 0  | 3 |
| 0.96    | 1        | 0 | 2 | 0        | 0  | 3 |
| 0.91    | 2        | 1 | 1 | 2        | 4  | 1 |
| 0.76    | 2        | 3 | 1 | 3        | 14 | 0 |
| 0.46    | 2        | 3 | 1 | 3        | 22 | 0 |
| 0.00    | 3        | 6 | 0 | 3        | 46 | 0 |

## Proxies selected by the Multiple Sources method

Model 1

- (JHU) cases
- (GT) covid
- (GT) covid-19
- (GT) covid symptoms
- (GT) quarantine
- (GT) fever

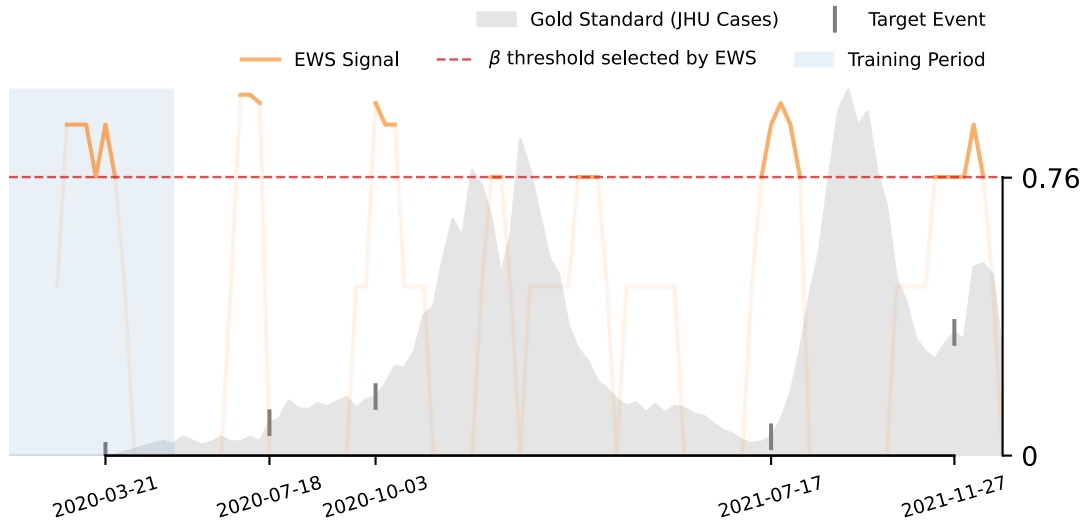

Model 2

- (GT) covid
- (GT) covid-19
- (GT) covid symptoms
- (GT) quarantine
- (GT) fever
- (GT) Acute bronchitis

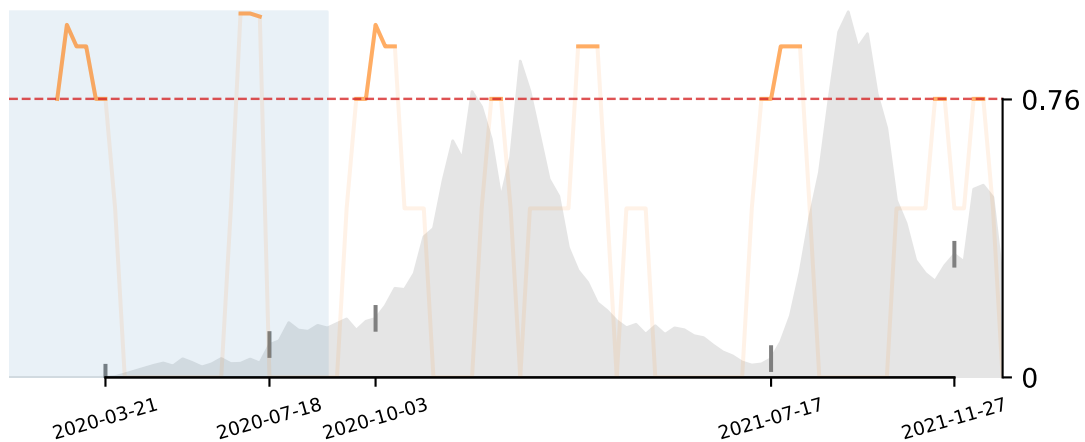

Model 3

- (GT) covid symptoms
- (GT) quarantine
- (GT) Acute bronchitis
- (GT) Pneumonia
- (GT) covid
- (GT) covid-19

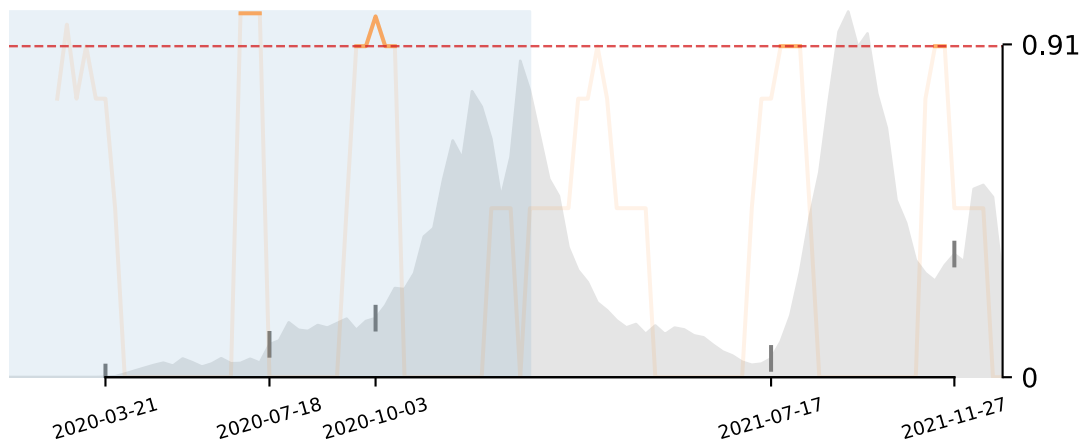

## Performance as a function of $\beta$

| $\beta$ | Training |    |    | Out of sample |    |    |
|---------|----------|----|----|---------------|----|----|
|         | tp       | fp | fn | tp            | fp | fn |
| 1.00    | 0        | 0  | 1  | 0             | 0  | 4  |
| 0.99    | 0        | 0  | 1  | 1             | 0  | 3  |
| 0.96    | 0        | 0  | 1  | 2             | 1  | 1  |
| 0.91    | 0        | 0  | 1  | 3             | 5  | 0  |
| 0.76    | 1        | 0  | 0  | 4             | 13 | 0  |
| 0.46    | 1        | 1  | 0  | 4             | 31 | 0  |
| 0.00    | 1        | 3  | 0  | 4             | 58 | 0  |

| $\beta$ | tp fp fn |   |   | tp fp fn |    |   |
|---------|----------|---|---|----------|----|---|
|         | 1.00     | 0 | 0 | 2        | 0  | 0 |
| 0.99    | 1        | 0 | 1 | 0        | 0  | 3 |
| 0.96    | 1        | 0 | 1 | 1        | 0  | 2 |
| 0.91    | 2        | 0 | 0 | 1        | 8  | 1 |
| 0.76    | 2        | 0 | 0 | 3        | 12 | 0 |
| 0.46    | 2        | 1 | 0 | 3        | 29 | 0 |
| 0.00    | 2        | 2 | 0 | 3        | 51 | 0 |

| $\beta$ | tp fp fn |   |   | tp fp fn |    |   |
|---------|----------|---|---|----------|----|---|
|         | 1.00     | 0 | 0 | 3        | 0  | 0 |
| 0.99    | 1        | 0 | 2 | 0        | 0  | 2 |
| 0.96    | 2        | 0 | 1 | 0        | 0  | 2 |
| 0.91    | 3        | 0 | 0 | 1        | 4  | 0 |
| 0.76    | 3        | 2 | 0 | 2        | 7  | 0 |
| 0.46    | 3        | 3 | 0 | 2        | 19 | 0 |
| 0.00    | 3        | 8 | 0 | 2        | 35 | 0 |

## Proxies selected by the Multiple Sources method

Model 1

- (GT) covid
- (GT) covid-19
- (GT) chest pain
- (GT) covid-19 who
- (GT) Abdominal pain

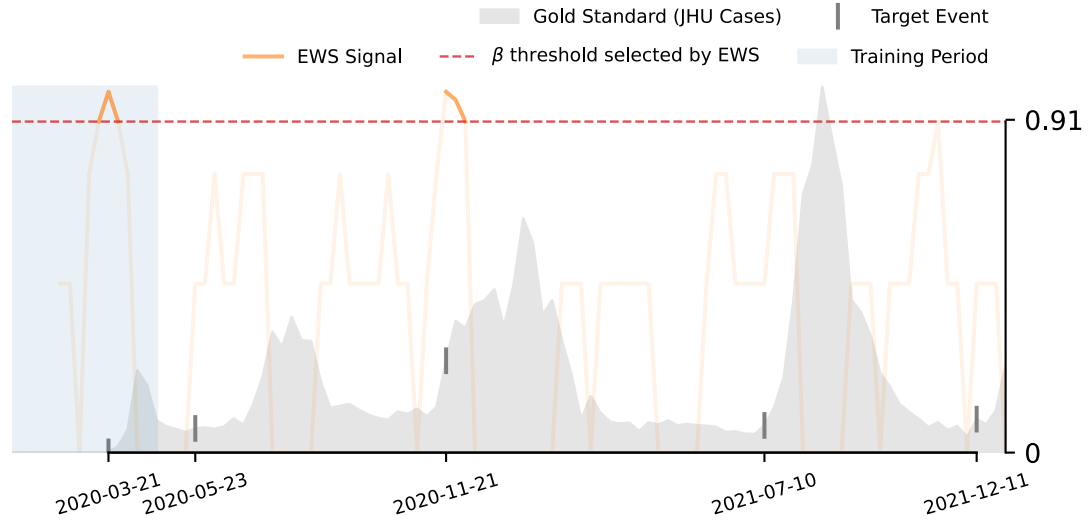

Model 2

- (GT) Abdominal pain
- (GT) Diarrhea

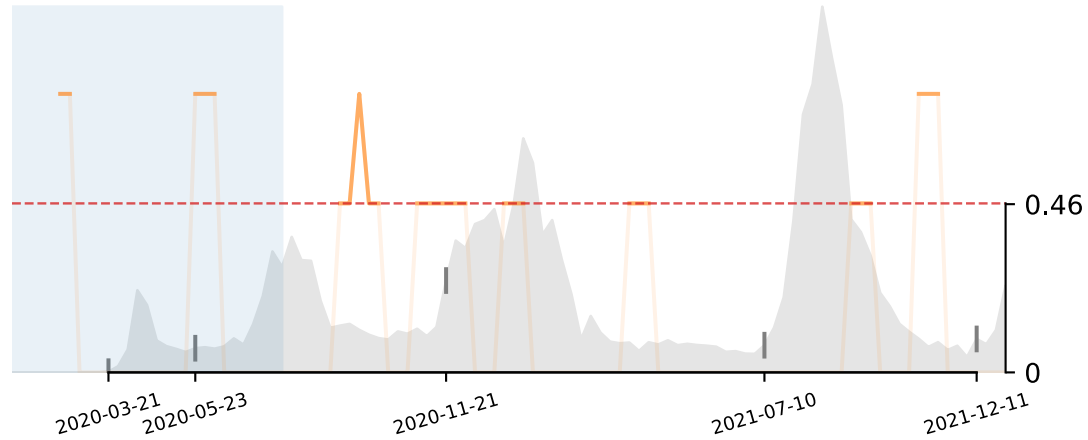

Model 3

- (GT) Abdominal pain
- (GT) Diarrhea
- (GT) covid
- (GT) chest pain
- (GT) covid symptoms
- (GT) Ageusia

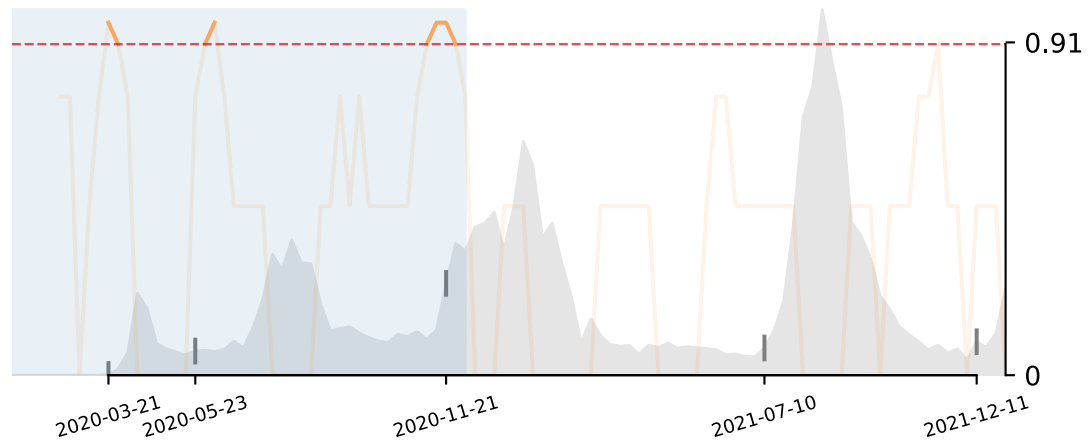

## Performance as a function of $\beta$

| $\beta$ | Training |    |    | Out of sample |    |    |
|---------|----------|----|----|---------------|----|----|
|         | tp       | fp | fn | tp            | fp | fn |
| 1.00    | 0        | 0  | 1  | 0             | 0  | 4  |
| 0.99    | 0        | 0  | 1  | 1             | 0  | 3  |
| 0.96    | 1        | 0  | 0  | 1             | 1  | 3  |
| 0.91    | 1        | 0  | 0  | 2             | 2  | 2  |
| 0.76    | 1        | 1  | 0  | 3             | 10 | 0  |
| 0.46    | 1        | 2  | 0  | 4             | 36 | 0  |
| 0.00    | 1        | 3  | 0  | 4             | 63 | 0  |

| $\beta$ | tp | fp | fn | tp | fp | fn |
|---------|----|----|----|----|----|----|
| 0.76    | 0  | 0  | 2  | 1  | 1  | 2  |
| 0.46    | 2  | 3  | 0  | 2  | 16 | 1  |
| 0.00    | 2  | 3  | 0  | 3  | 54 | 0  |

| $\beta$ | tp | fp | fn | tp | fp | fn |
|---------|----|----|----|----|----|----|
| 1.00    | 0  | 0  | 3  | 0  | 0  | 2  |
| 0.99    | 0  | 0  | 3  | 0  | 0  | 2  |
| 0.96    | 0  | 0  | 3  | 0  | 0  | 2  |
| 0.91    | 2  | 1  | 1  | 1  | 0  | 1  |
| 0.76    | 2  | 4  | 1  | 2  | 0  | 0  |
| 0.46    | 3  | 10 | 0  | 2  | 20 | 0  |
| 0.00    | 3  | 21 | 0  | 2  | 42 | 0  |

## Proxies selected by the Multiple Sources method

Model 1

- (JHU) cases
- (GT) covid
- (GT) how long does covid last
- (GT) covid-19
- (GT) chest pain
- (GT) covid symptoms

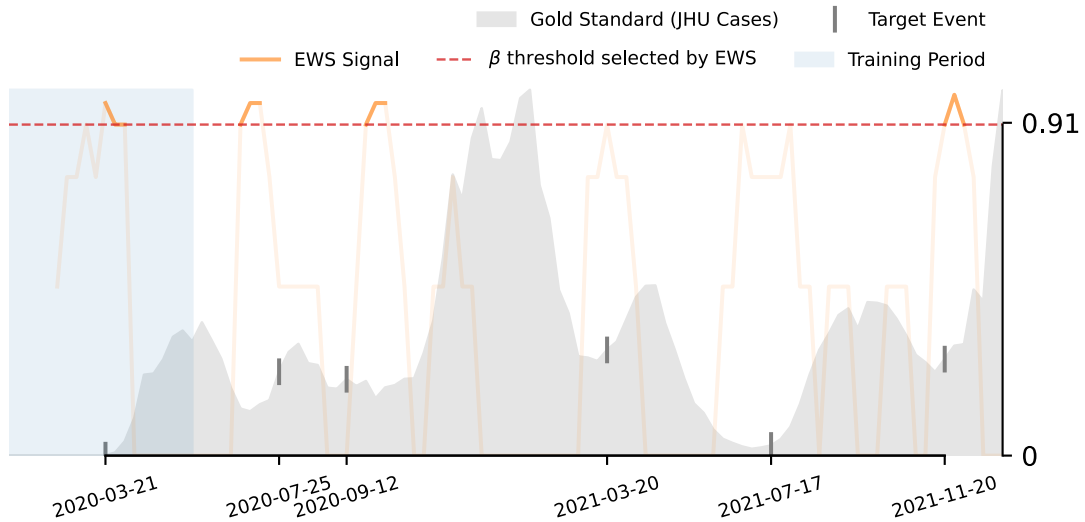

Model 2

- (JHU) cases
- (GT) covid
- (GT) covid-19
- (GT) chest pain
- (GT) covid symptoms
- (GT) chest tightness

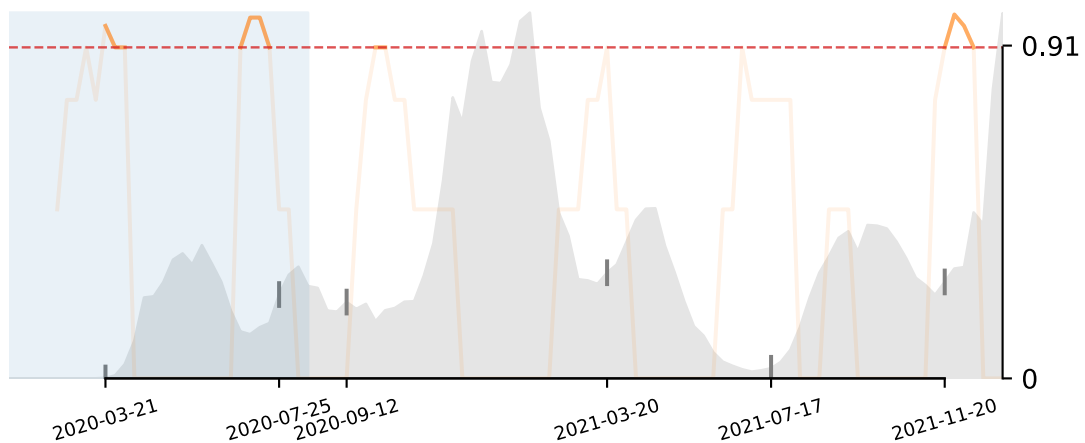

Model 3

- (GT) Bronchitis
- (GT) Asthma
- (GT) covid-19 who
- (GT) Hyperventilation
- (GT) Nasal congestion
- (JHU) cases

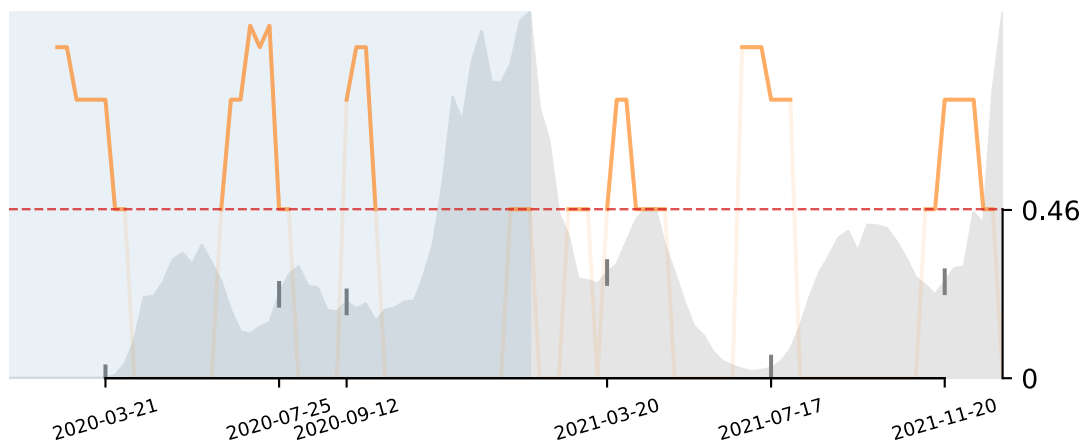

## Performance as a function of $\beta$

| $\beta$ | Training |    |    | Out of sample |    |    |
|---------|----------|----|----|---------------|----|----|
|         | tp       | fp | fn | tp            | fp | fn |
| 1.00    | 0        | 0  | 1  | 0             | 0  | 5  |
| 0.99    | 0        | 0  | 1  | 0             | 1  | 4  |
| 0.96    | 0        | 0  | 1  | 1             | 3  | 3  |
| 0.91    | 1        | 0  | 0  | 4             | 6  | 0  |
| 0.76    | 1        | 2  | 0  | 4             | 12 | 0  |
| 0.46    | 1        | 2  | 0  | 5             | 24 | 0  |
| 0.00    | 1        | 3  | 0  | 5             | 49 | 0  |

| $\beta$ | tp fp fn |   |   | tp fp fn |    |   |
|---------|----------|---|---|----------|----|---|
|         | 1.00     | 0 | 0 | 2        | 0  | 1 |
| 0.99    | 0        | 0 | 2 | 0        | 1  | 3 |
| 0.96    | 1        | 0 | 1 | 0        | 2  | 3 |
| 0.91    | 2        | 0 | 0 | 3        | 5  | 1 |
| 0.76    | 2        | 2 | 0 | 3        | 10 | 0 |
| 0.46    | 2        | 2 | 0 | 3        | 21 | 0 |
| 0.00    | 2        | 4 | 0 | 4        | 47 | 0 |

| $\beta$ | tp fp fn |    |   | tp fp fn |    |   |
|---------|----------|----|---|----------|----|---|
|         | 1.00     | 0  | 0 | 3        | 0  | 0 |
| 0.99    | 0        | 0  | 3 | 0        | 0  | 3 |
| 0.96    | 0        | 0  | 3 | 0        | 0  | 3 |
| 0.91    | 1        | 0  | 2 | 1        | 0  | 2 |
| 0.76    | 2        | 3  | 1 | 2        | 7  | 0 |
| 0.46    | 3        | 4  | 0 | 3        | 13 | 0 |
| 0.00    | 3        | 12 | 0 | 3        | 28 | 0 |

## Proxies selected by the Multiple Sources method

Model 1

- (GT) covid
- (GT) how long does covid last
- (GT) covid-19
- (GT) chest pain
- (GT) covid symptoms
- (GT) quarantine

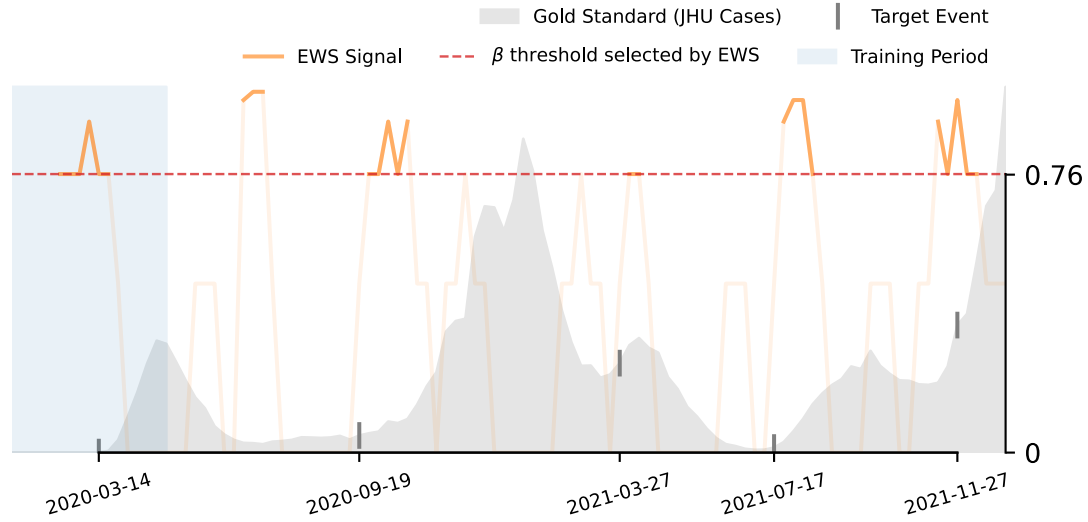

Model 2

- (GT) covid-19
- (GT) Ageusia
- (GT) Asthma
- (GT) Wheeze
- (GT) Anosmia
- (GT) Fever

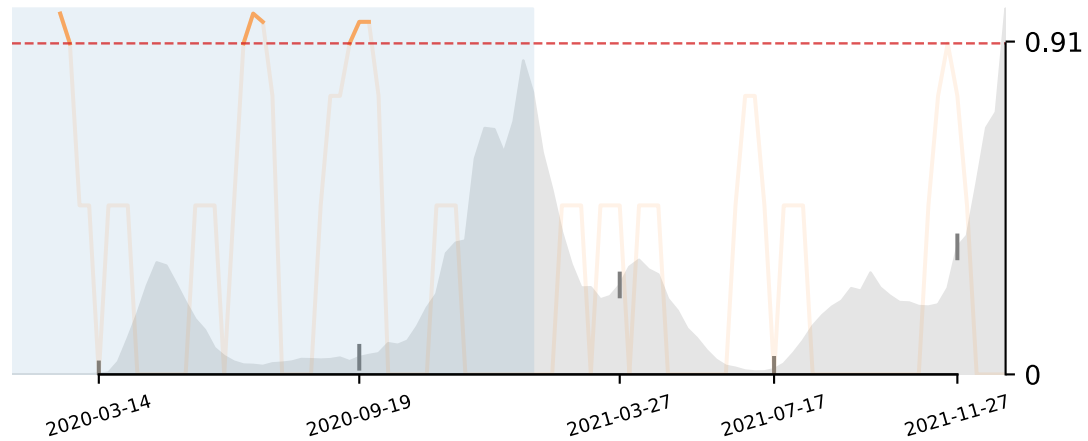

Model 3

- (GT) covid-19
- (GT) Fever
- (GT) Acute bronchitis
- (GT) Ageusia
- (GT) Asthma
- (GT) Cough

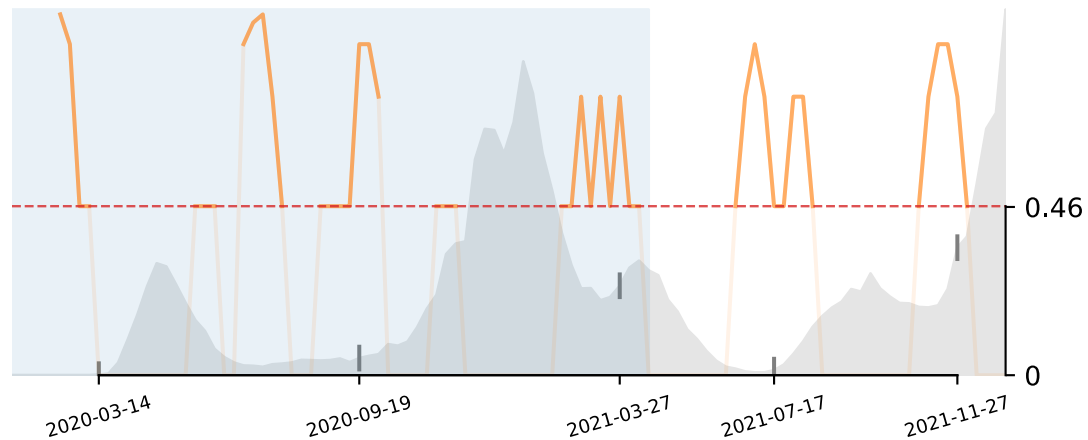

## Performance as a function of $\beta$

| $\beta$ | Training |    |    | Out of sample |    |    |
|---------|----------|----|----|---------------|----|----|
|         | tp       | fp | fn | tp            | fp | fn |
| 1.00    | 0        | 0  | 1  | 0             | 0  | 4  |
| 0.99    | 0        | 0  | 1  | 0             | 2  | 4  |
| 0.96    | 0        | 0  | 1  | 1             | 5  | 2  |
| 0.91    | 0        | 0  | 1  | 1             | 8  | 2  |
| 0.76    | 1        | 0  | 0  | 2             | 17 | 0  |
| 0.46    | 1        | 1  | 0  | 4             | 35 | 0  |
| 0.00    | 1        | 2  | 0  | 4             | 59 | 0  |

| $\beta$ | tp |    |    | fp |    |    | fn |    |    |
|---------|----|----|----|----|----|----|----|----|----|
|         | tp | fp | fn | tp | fp | fn | tp | fp | fn |
| 1.00    | 0  | 0  | 2  | 0  | 0  | 3  | 0  | 0  | 3  |
| 0.99    | 0  | 0  | 2  | 0  | 0  | 3  | 0  | 0  | 3  |
| 0.96    | 1  | 1  | 1  | 0  | 0  | 3  | 0  | 0  | 3  |
| 0.91    | 2  | 3  | 0  | 1  | 0  | 2  | 1  | 0  | 2  |
| 0.76    | 2  | 4  | 0  | 2  | 0  | 1  | 2  | 0  | 1  |
| 0.46    | 2  | 6  | 0  | 3  | 7  | 0  | 3  | 7  | 0  |
| 0.00    | 2  | 16 | 0  | 3  | 28 | 0  | 3  | 28 | 0  |

| $\beta$ | tp |    |    | fp |    |    | fn |    |    |
|---------|----|----|----|----|----|----|----|----|----|
|         | tp | fp | fn | tp | fp | fn | tp | fp | fn |
| 1.00    | 0  | 0  | 3  | 0  | 0  | 2  | 0  | 0  | 2  |
| 0.99    | 0  | 0  | 3  | 0  | 0  | 2  | 0  | 0  | 2  |
| 0.96    | 1  | 1  | 2  | 0  | 0  | 2  | 0  | 0  | 2  |
| 0.91    | 1  | 2  | 2  | 2  | 0  | 0  | 2  | 0  | 0  |
| 0.76    | 2  | 4  | 1  | 2  | 2  | 0  | 2  | 2  | 0  |
| 0.46    | 3  | 6  | 0  | 2  | 5  | 0  | 2  | 5  | 0  |
| 0.00    | 3  | 17 | 0  | 2  | 23 | 0  | 2  | 23 | 0  |

## Proxies selected by the Multiple Sources method

Model 1

- (GT) covid
- (GT) how long does covid last
- (GT) covid-19
- (GT) chest pain
- (GT) covid symptoms
- (GT) chest tightness

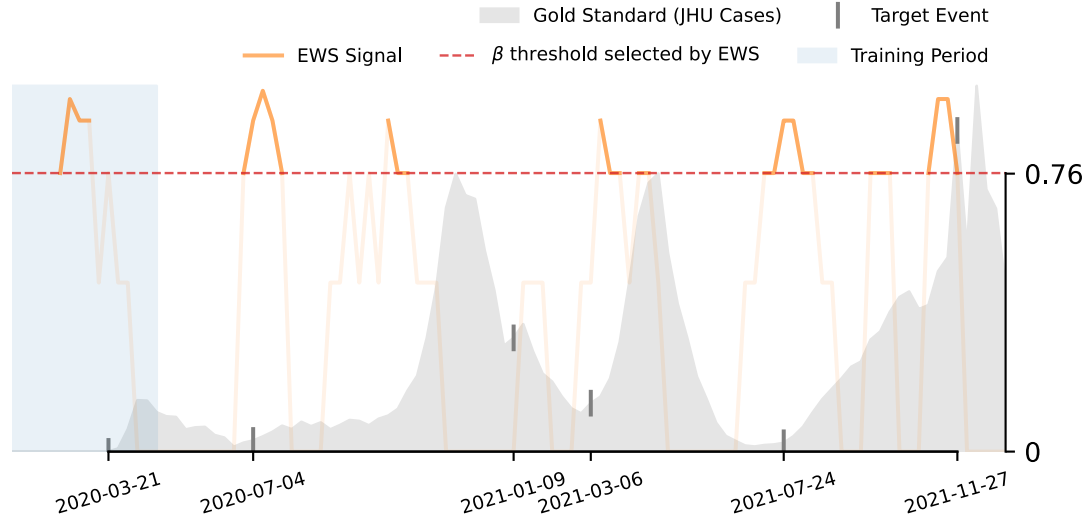

Model 2

- (GT) covid-19 who
- (GT) Acute bronchitis
- (GT) Bronchitis
- (GT) Cough
- (GT) Nasal congestion
- (GT) Pneumonia

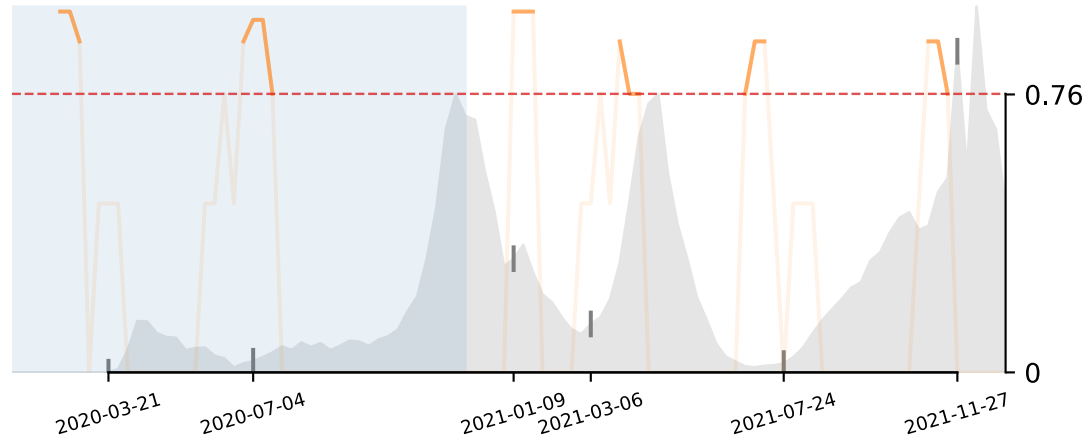

Model 3

- (GT) Acute bronchitis
- (GT) Bronchitis
- (GT) Cough
- (GT) Nasal congestion
- (GT) Pneumonia
- (GT) Asthma

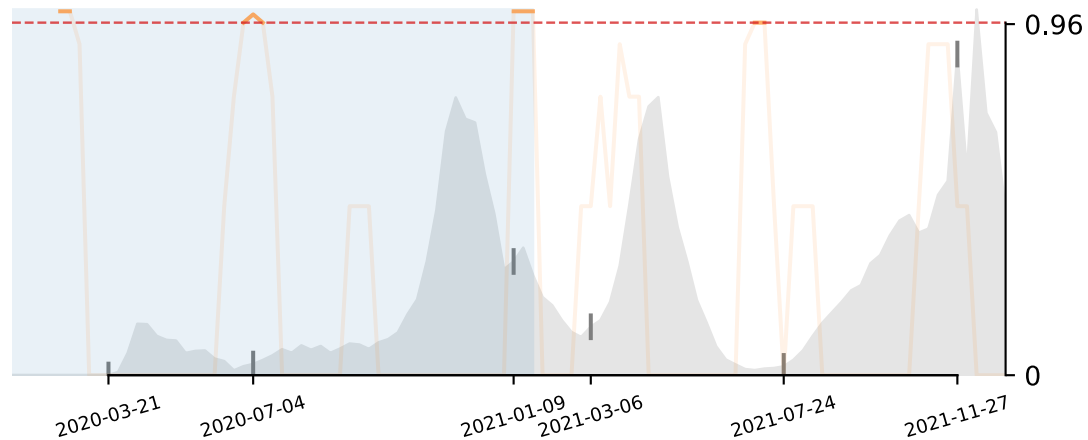

## Performance as a function of $\beta$

| $\beta$ | Training |    |    | Out of sample |    |    |
|---------|----------|----|----|---------------|----|----|
|         | tp       | fp | fn | tp            | fp | fn |
| 1.00    | 0        | 0  | 1  | 0             | 0  | 5  |
| 0.99    | 0        | 0  | 1  | 0             | 1  | 4  |
| 0.96    | 0        | 0  | 1  | 1             | 1  | 3  |
| 0.91    | 1        | 0  | 0  | 3             | 5  | 1  |
| 0.76    | 1        | 0  | 0  | 3             | 19 | 1  |
| 0.46    | 1        | 1  | 0  | 4             | 31 | 0  |
| 0.00    | 1        | 3  | 0  | 5             | 53 | 0  |

| $\beta$ | tp fp fn |   |   | tp fp fn |    |   |
|---------|----------|---|---|----------|----|---|
|         | 1.00     | 0 | 0 | 2        | 0  | 0 |
| 0.99    | 0        | 0 | 2 | 2        | 1  | 2 |
| 0.96    | 1        | 1 | 1 | 2        | 1  | 2 |
| 0.91    | 2        | 2 | 0 | 4        | 2  | 0 |
| 0.76    | 2        | 2 | 0 | 4        | 5  | 0 |
| 0.46    | 2        | 3 | 0 | 4        | 9  | 0 |
| 0.00    | 2        | 5 | 0 | 4        | 30 | 0 |

| $\beta$ | tp fp fn |   |   | tp fp fn |    |   |
|---------|----------|---|---|----------|----|---|
|         | 1.00     | 0 | 0 | 3        | 0  | 0 |
| 0.99    | 2        | 3 | 1 | 0        | 0  | 3 |
| 0.96    | 3        | 3 | 0 | 1        | 0  | 2 |
| 0.91    | 3        | 4 | 0 | 2        | 1  | 1 |
| 0.76    | 3        | 4 | 0 | 2        | 4  | 0 |
| 0.46    | 3        | 5 | 0 | 3        | 9  | 0 |
| 0.00    | 3        | 8 | 0 | 3        | 29 | 0 |



## Proxies selected by the Multiple Sources method

Model 1

- (JHU) cases
- (GT) covid
- (GT) covid-19
- (GT) fever
- (GT) Acute bronchitis
- (GT) Asthma

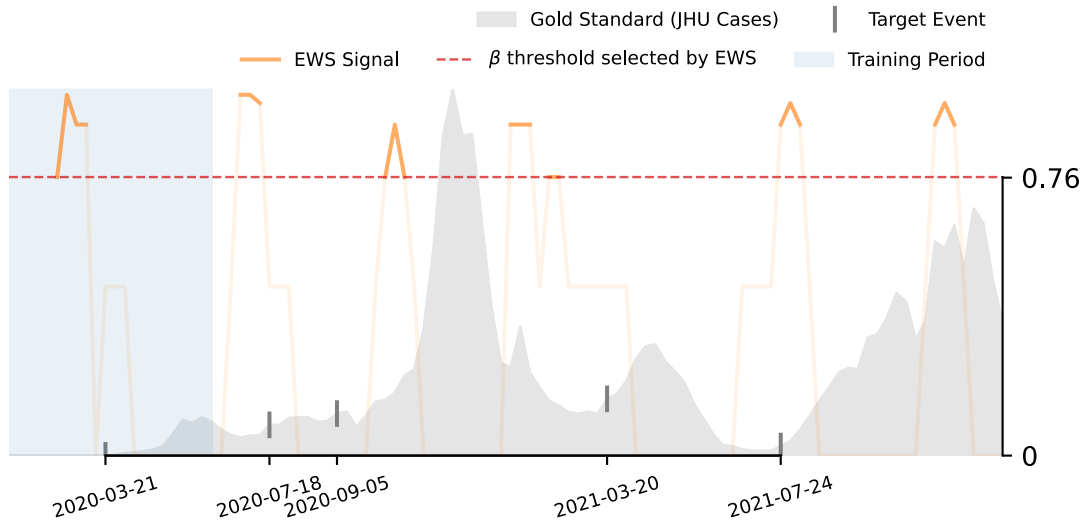

Model 2

- (JHU) cases
- (GT) covid
- (GT) covid-19
- (GT) fever
- (GT) Acute bronchitis
- (GT) Asthma

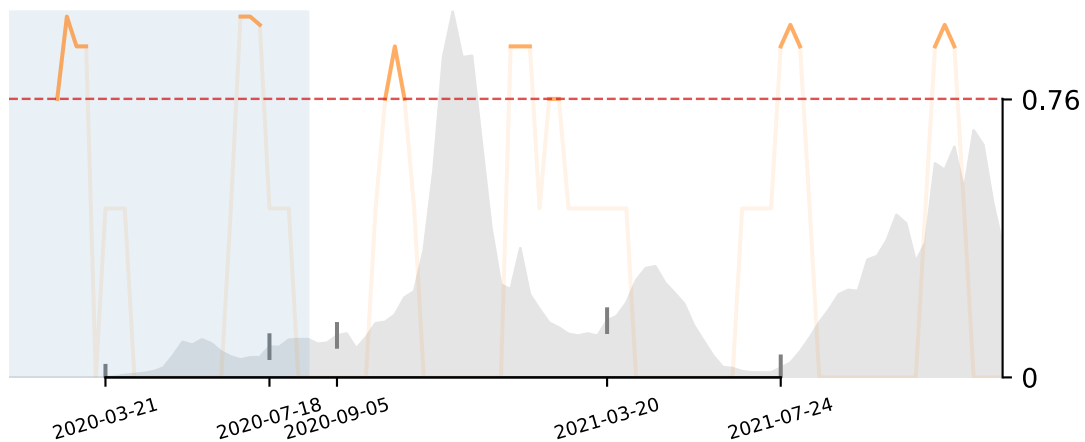

Model 3

- (GT) Nasal congestion
- (GT) Ageusia
- (JHU) cases
- (GT) Acute bronchitis
- (GT) Asthma
- (GT) Wheeze

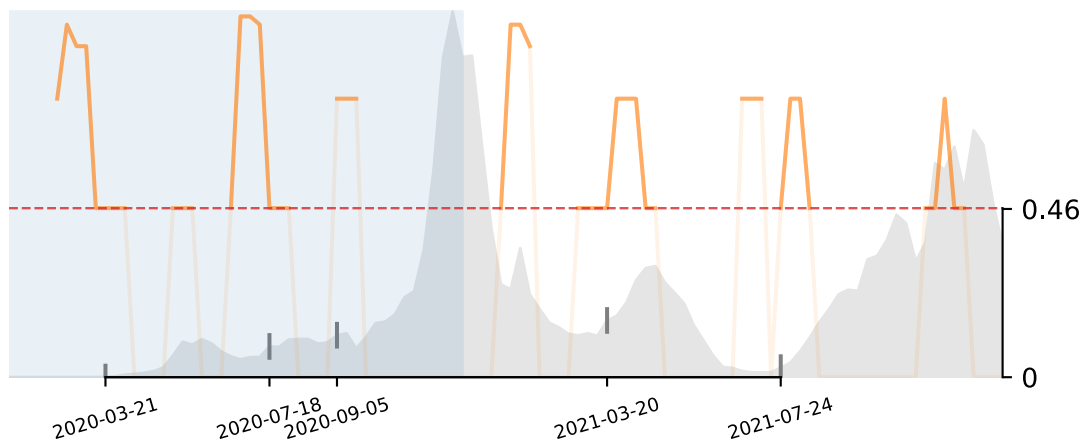

## Performance as a function of $\beta$

| $\beta$ | Training |    |    | Out of sample |    |    |
|---------|----------|----|----|---------------|----|----|
|         | tp       | fp | fn | tp            | fp | fn |
| 1.00    | 0        | 0  | 1  | 0             | 0  | 4  |
| 0.99    | 0        | 0  | 1  | 1             | 0  | 3  |
| 0.96    | 1        | 0  | 0  | 1             | 2  | 2  |
| 0.91    | 1        | 0  | 0  | 2             | 9  | 2  |
| 0.76    | 1        | 0  | 0  | 3             | 11 | 1  |
| 0.46    | 1        | 1  | 0  | 4             | 19 | 0  |
| 0.00    | 1        | 3  | 0  | 4             | 55 | 0  |

| $\beta$ | tp fp fn |   |   | tp fp fn |    |   |
|---------|----------|---|---|----------|----|---|
|         | 1.00     | 0 | 0 | 2        | 0  | 0 |
| 0.99    | 0        | 0 | 2 | 0        | 0  | 3 |
| 0.96    | 2        | 0 | 0 | 0        | 2  | 2 |
| 0.91    | 2        | 0 | 0 | 1        | 9  | 2 |
| 0.76    | 2        | 0 | 0 | 2        | 11 | 1 |
| 0.46    | 2        | 1 | 0 | 2        | 19 | 1 |
| 0.00    | 2        | 5 | 0 | 3        | 55 | 0 |

| $\beta$ | tp fp fn |    |   | tp fp fn |    |   |
|---------|----------|----|---|----------|----|---|
|         | 1.00     | 0  | 0 | 3        | 0  | 0 |
| 0.99    | 0        | 0  | 3 | 0        | 0  | 2 |
| 0.96    | 1        | 0  | 2 | 0        | 2  | 2 |
| 0.91    | 2        | 0  | 1 | 0        | 3  | 2 |
| 0.76    | 2        | 0  | 1 | 1        | 9  | 0 |
| 0.46    | 3        | 3  | 0 | 2        | 17 | 0 |
| 0.00    | 3        | 10 | 0 | 2        | 42 | 0 |

## Proxies selected by the Multiple Sources method

Model 1

- (GT) covid
- (GT) covid-19
- (GT) covid symptoms
- (GT) Acute bronchitis
- (GT) Bronchitis
- (GT) Burning Chest Pain

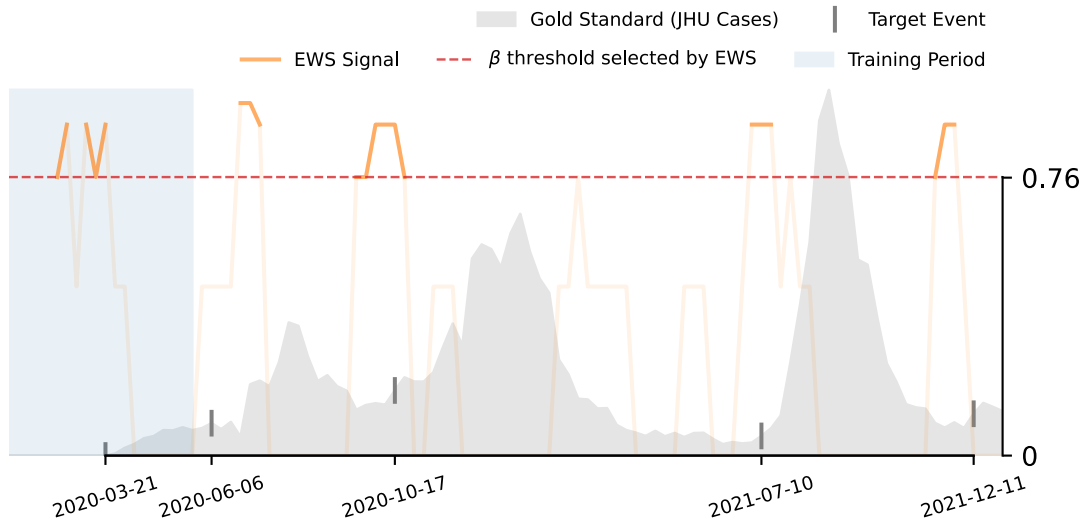

Model 2

- (GT) covid symptoms
- (GT) fever
- (GT) Chest pain
- (GT) Hyperventilation

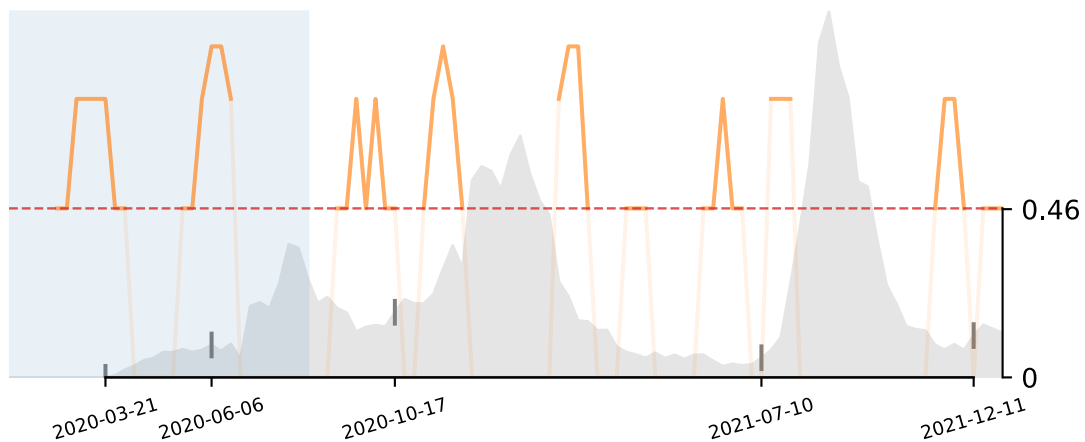

Model 3

- (GT) covid symptoms
- (GT) Chest pain
- (GT) Hyperventilation
- (GT) fever
- (GT) Anosmia
- (GT) covid

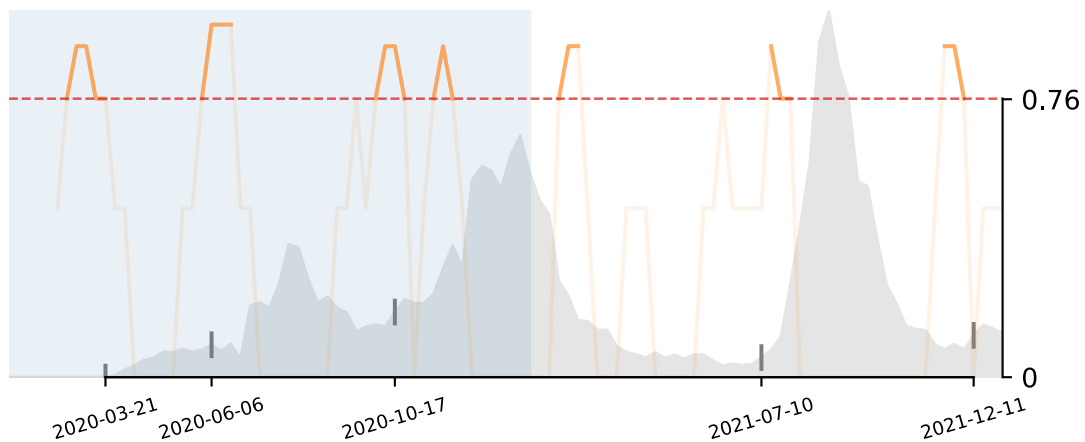

## Performance as a function of $\beta$

| $\beta$ | Training |    |    | Out of sample |    |    |
|---------|----------|----|----|---------------|----|----|
|         | tp       | fp | fn | tp            | fp | fn |
| 1.00    | 0        | 0  | 1  | 0             | 0  | 4  |
| 0.99    | 0        | 0  | 1  | 0             | 0  | 4  |
| 0.96    | 0        | 0  | 1  | 0             | 2  | 4  |
| 0.91    | 0        | 0  | 1  | 3             | 4  | 1  |
| 0.76    | 1        | 0  | 0  | 3             | 7  | 1  |
| 0.46    | 1        | 1  | 0  | 4             | 24 | 0  |
| 0.00    | 1        | 3  | 0  | 4             | 61 | 0  |

| $\beta$ | tp fp fn |   |   | tp fp fn |    |   |
|---------|----------|---|---|----------|----|---|
|         | 0.96     | 0 | 0 | 2        | 0  | 0 |
| 0.91    | 0        | 0 | 2 | 0        | 3  | 3 |
| 0.76    | 1        | 1 | 1 | 3        | 9  | 0 |
| 0.46    | 2        | 2 | 0 | 3        | 18 | 0 |
| 0.00    | 2        | 5 | 0 | 3        | 51 | 0 |

| $\beta$ | tp fp fn |    |   | tp fp fn |    |   |
|---------|----------|----|---|----------|----|---|
|         | 1.00     | 0  | 0 | 3        | 0  | 0 |
| 0.99    | 0        | 0  | 3 | 0        | 0  | 2 |
| 0.96    | 0        | 0  | 3 | 0        | 0  | 2 |
| 0.91    | 1        | 2  | 2 | 1        | 3  | 0 |
| 0.76    | 3        | 3  | 0 | 2        | 6  | 0 |
| 0.46    | 3        | 6  | 0 | 2        | 13 | 0 |
| 0.00    | 3        | 15 | 0 | 2        | 35 | 0 |

## Proxies selected by the Multiple Sources method

Model 1

- (JHU) cases
- (GT) covid
- (GT) covid-19
- (GT) chest pain
- (GT) covid symptoms
- (GT) covid-19 who

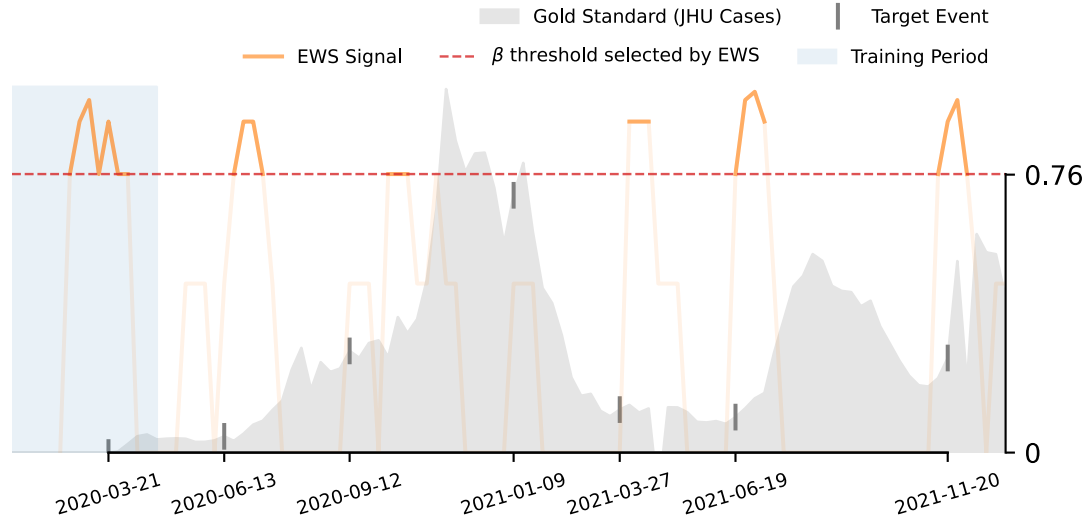

## Performance as a function of $\beta$

| $\beta$ | Training |    |    | Out of sample |    |    |
|---------|----------|----|----|---------------|----|----|
|         | tp       | fp | fn | tp            | fp | fn |
| 1.00    | 0        | 0  | 1  | 0             | 0  | 6  |
| 0.99    | 0        | 0  | 1  | 0             | 1  | 5  |
| 0.96    | 0        | 0  | 1  | 0             | 3  | 4  |
| 0.91    | 1        | 0  | 0  | 1             | 9  | 2  |
| 0.76    | 1        | 0  | 0  | 2             | 16 | 2  |
| 0.46    | 1        | 2  | 0  | 5             | 30 | 0  |
| 0.00    | 1        | 2  | 0  | 6             | 46 | 0  |

Model 2

- (GT) chest pain
- (GT) covid symptoms
- (GT) Chest pain
- (GT) Nasal congestion
- (GT) Otitis
- (GT) Sore throat

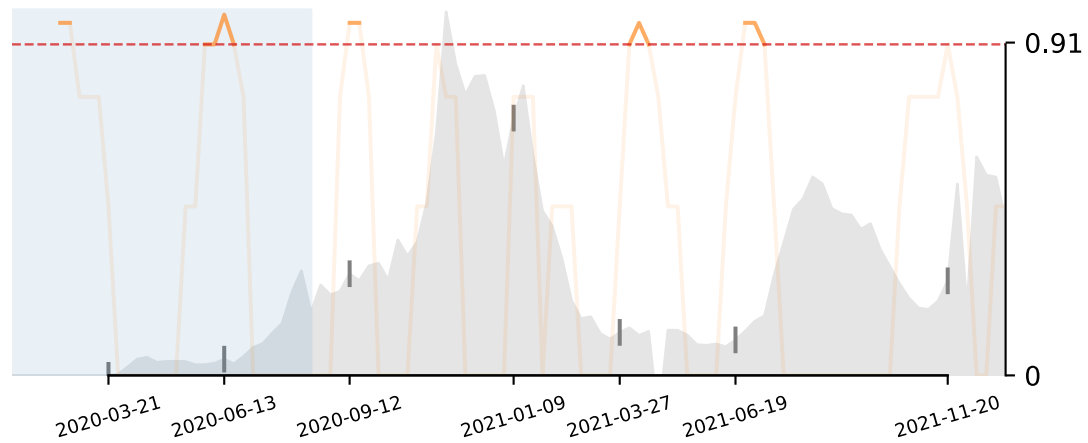

| $\beta$ | tp fp fn |   |   | tp fp fn |    |   |
|---------|----------|---|---|----------|----|---|
|         | 1.00     | 0 | 0 | 2        | 0  | 0 |
| 0.99    | 0        | 0 | 2 | 0        | 0  | 5 |
| 0.96    | 1        | 0 | 1 | 1        | 4  | 2 |
| 0.91    | 2        | 1 | 0 | 2        | 8  | 1 |
| 0.76    | 2        | 2 | 0 | 4        | 14 | 0 |
| 0.46    | 2        | 3 | 0 | 5        | 22 | 0 |
| 0.00    | 2        | 3 | 0 | 5        | 40 | 0 |

Model 3

- (GT) covid symptoms
- (GT) Nasal congestion
- (GT) Sore throat
- (GT) Throat irritation
- (GT) Chest pain
- (GT) chest pain

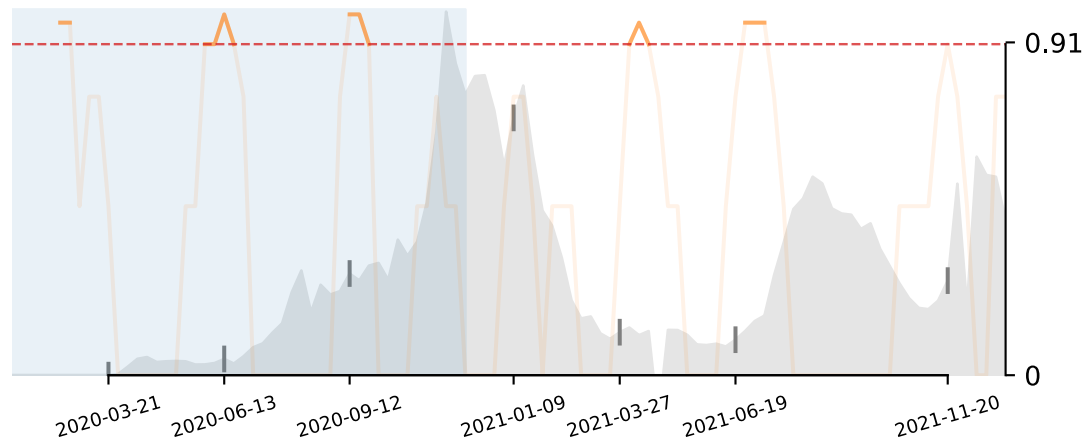

| $\beta$ | tp fp fn |    |   | tp fp fn |    |   |
|---------|----------|----|---|----------|----|---|
|         | 1.00     | 0  | 0 | 3        | 0  | 0 |
| 0.99    | 0        | 0  | 3 | 0        | 0  | 4 |
| 0.96    | 2        | 1  | 1 | 0        | 4  | 2 |
| 0.91    | 3        | 2  | 0 | 1        | 6  | 1 |
| 0.76    | 3        | 4  | 0 | 3        | 12 | 0 |
| 0.46    | 3        | 6  | 0 | 4        | 17 | 0 |
| 0.00    | 3        | 10 | 0 | 4        | 30 | 0 |

## Proxies selected by the Multiple Sources method

Model 1

- (GT) covid
- (GT) covid-19
- (GT) chest pain
- (GT) covid symptoms
- (GT) quarantine
- (GT) fever

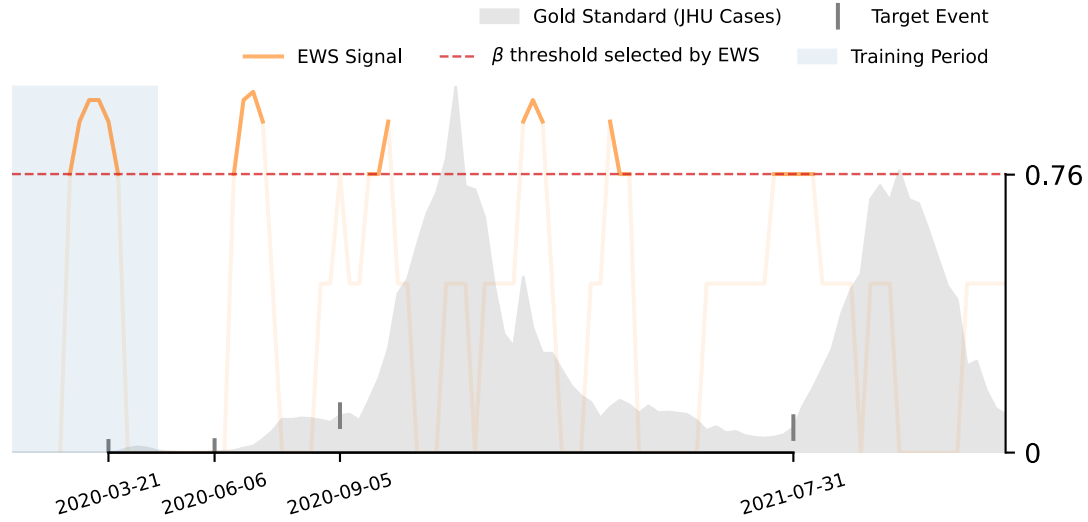

Model 2

- (GT) Diarrhea
- (GT) Phlegm

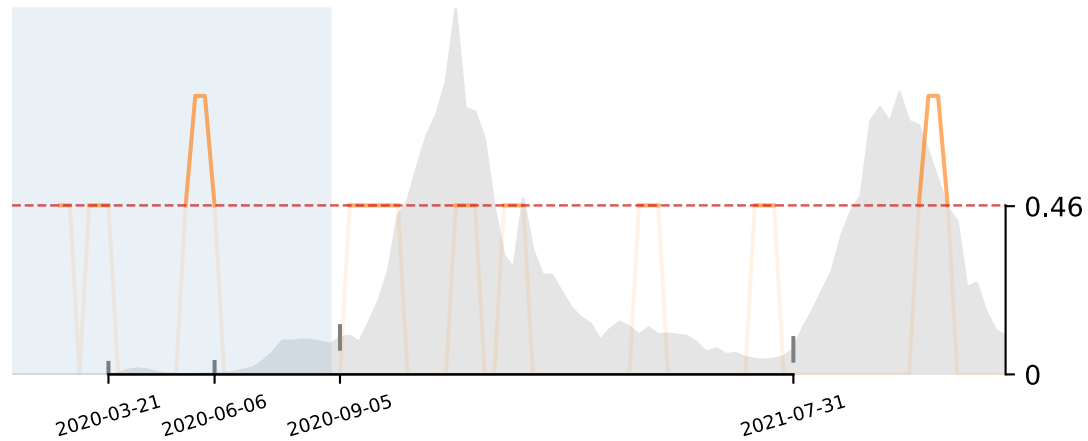

Model 3

- (GT) Vomiting
- (GT) covid
- (GT) Nasal congestion
- (GT) Phlegm
- (GT) Shortness of breath
- (GT) fever

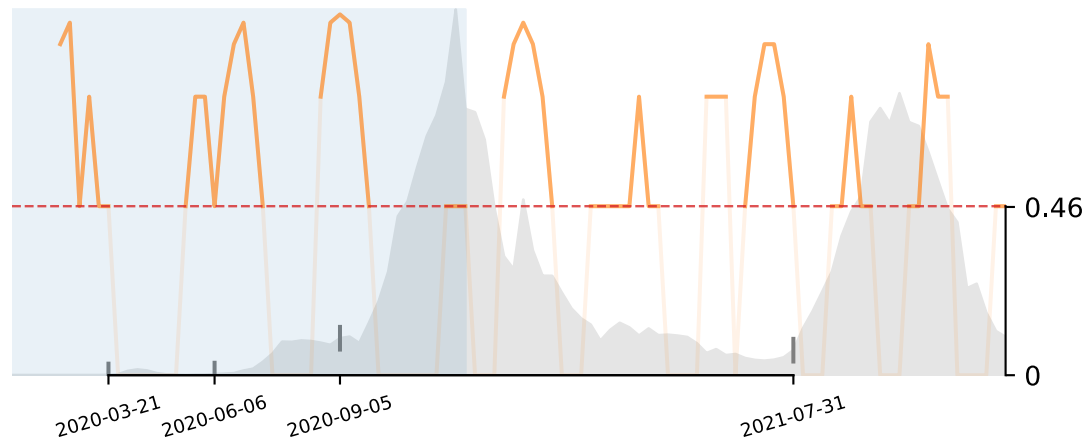

## Performance as a function of $\beta$

| $\beta$ | Training |    |    | Out of sample |    |    |
|---------|----------|----|----|---------------|----|----|
|         | tp       | fp | fn | tp            | fp | fn |
| 1.00    | 0        | 0  | 1  | 0             | 0  | 3  |
| 0.99    | 0        | 0  | 1  | 0             | 1  | 3  |
| 0.96    | 0        | 0  | 1  | 0             | 3  | 3  |
| 0.91    | 1        | 0  | 0  | 0             | 8  | 3  |
| 0.76    | 1        | 0  | 0  | 2             | 15 | 0  |
| 0.46    | 1        | 1  | 0  | 2             | 45 | 0  |
| 0.00    | 1        | 1  | 0  | 3             | 68 | 0  |

| $\beta$ | tp fp fn |   |   | tp fp fn |    |   |
|---------|----------|---|---|----------|----|---|
|         | 0.76     | 0 | 0 | 2        | 0  | 2 |
| 0.46    | 1        | 0 | 1 | 1        | 19 | 0 |
| 0.00    | 2        | 1 | 0 | 2        | 62 | 0 |

| $\beta$ | tp fp fn |    |   | tp fp fn |    |   |
|---------|----------|----|---|----------|----|---|
|         | 1.00     | 0  | 0 | 3        | 0  | 0 |
| 0.99    | 0        | 0  | 3 | 0        | 0  | 1 |
| 0.96    | 1        | 0  | 2 | 0        | 1  | 1 |
| 0.91    | 2        | 2  | 1 | 1        | 4  | 0 |
| 0.76    | 2        | 4  | 1 | 1        | 13 | 0 |
| 0.46    | 3        | 7  | 0 | 1        | 29 | 0 |
| 0.00    | 3        | 12 | 0 | 1        | 49 | 0 |

## Proxies selected by the Multiple Sources method

Model 1

- (JHU) cases
- (GT) covid
- (GT) covid-19
- (GT) chest pain
- (GT) quarantine
- (GT) fever

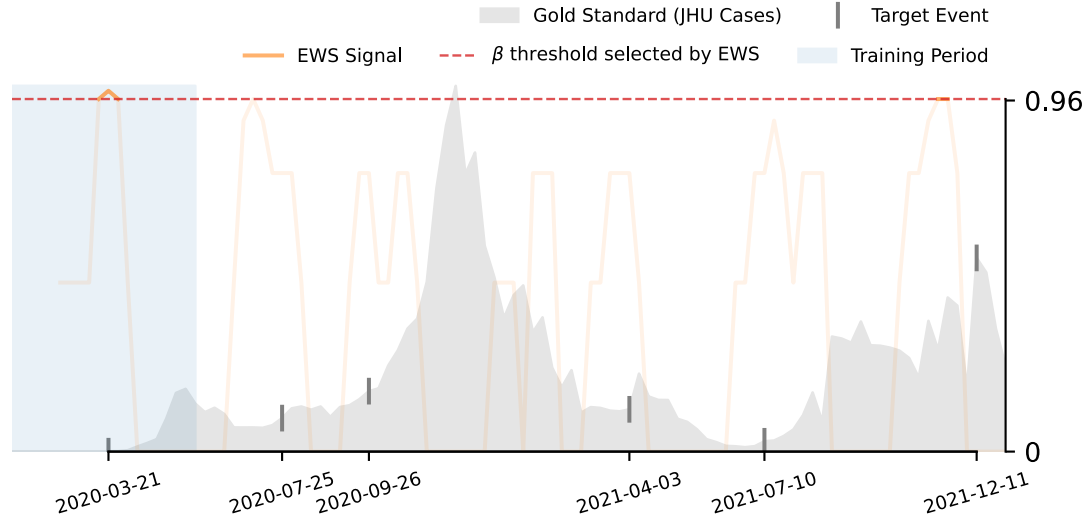

Model 2

- (JHU) cases
- (GT) covid
- (GT) covid-19
- (GT) chest pain
- (GT) quarantine
- (GT) fever

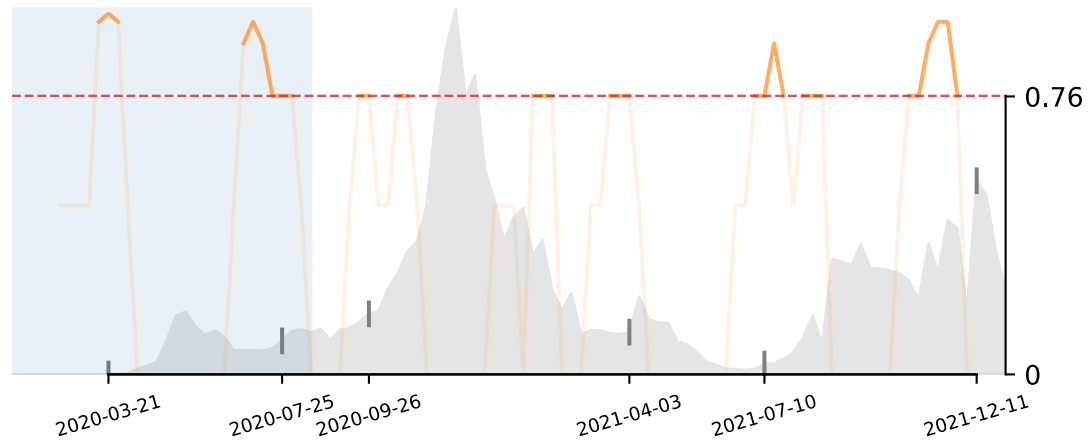

Model 3

- (GT) covid-19
- (GT) fever
- (GT) Asthma
- (GT) Pneumonia
- (JHU) cases
- (GT) quarantine

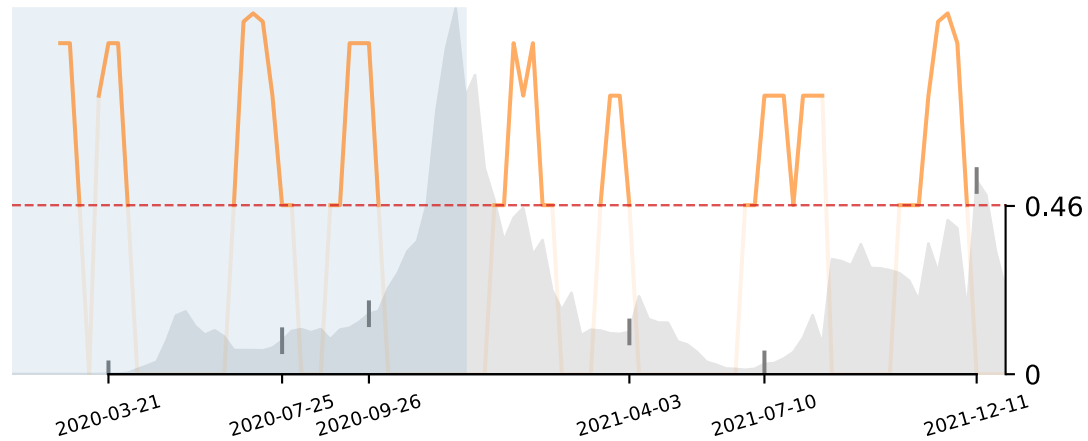

## Performance as a function of $\beta$

| $\beta$ | Training |    |    | Out of sample |    |    |
|---------|----------|----|----|---------------|----|----|
|         | tp       | fp | fn | tp            | fp | fn |
| 1.00    | 0        | 0  | 1  | 0             | 0  | 5  |
| 0.99    | 0        | 0  | 1  | 0             | 0  | 5  |
| 0.96    | 1        | 0  | 0  | 2             | 0  | 3  |
| 0.91    | 1        | 1  | 0  | 2             | 1  | 2  |
| 0.76    | 1        | 1  | 0  | 5             | 12 | 0  |
| 0.46    | 1        | 1  | 0  | 5             | 22 | 0  |
| 0.00    | 1        | 3  | 0  | 5             | 49 | 0  |

| $\beta$ | tp fp fn |   |   | tp fp fn |    |   |
|---------|----------|---|---|----------|----|---|
|         | 1.00     | 0 | 0 | 2        | 0  | 0 |
| 0.99    | 0        | 0 | 2 | 0        | 0  | 4 |
| 0.96    | 1        | 0 | 1 | 1        | 0  | 3 |
| 0.91    | 2        | 1 | 0 | 1        | 1  | 2 |
| 0.76    | 2        | 1 | 0 | 4        | 11 | 0 |
| 0.46    | 2        | 2 | 0 | 4        | 20 | 0 |
| 0.00    | 2        | 6 | 0 | 4        | 45 | 0 |

| $\beta$ | tp fp fn |   |   | tp fp fn |    |   |
|---------|----------|---|---|----------|----|---|
|         | 1.00     | 0 | 0 | 3        | 0  | 0 |
| 0.99    | 0        | 0 | 3 | 1        | 0  | 2 |
| 0.96    | 1        | 0 | 2 | 1        | 0  | 2 |
| 0.91    | 1        | 0 | 2 | 1        | 2  | 2 |
| 0.76    | 3        | 2 | 0 | 3        | 8  | 0 |
| 0.46    | 3        | 2 | 0 | 3        | 15 | 0 |
| 0.00    | 3        | 6 | 0 | 3        | 35 | 0 |

## Proxies selected by the Multiple Sources method

Model 1

- (JHU) cases
- (GT) covid
- (GT) covid-19
- (GT) chest pain
- (GT) covid symptoms
- (GT) covid-19 who

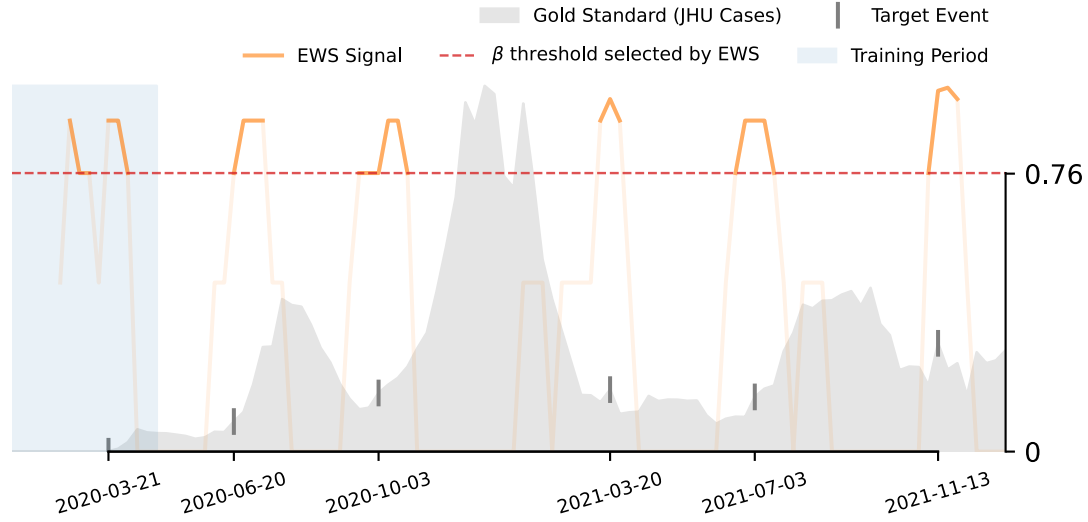

## Performance as a function of $\beta$

| $\beta$ | Training |    |    | Out of sample |    |    |
|---------|----------|----|----|---------------|----|----|
|         | tp       | fp | fn | tp            | fp | fn |
| 1.00    | 0        | 0  | 1  | 0             | 1  | 4  |
| 0.99    | 0        | 0  | 1  | 1             | 1  | 4  |
| 0.96    | 0        | 0  | 1  | 2             | 2  | 3  |
| 0.91    | 0        | 0  | 1  | 3             | 9  | 0  |
| 0.76    | 1        | 1  | 0  | 5             | 11 | 0  |
| 0.46    | 1        | 2  | 0  | 5             | 22 | 0  |
| 0.00    | 1        | 3  | 0  | 5             | 53 | 0  |

Model 2

- (JHU) cases
- (GT) covid-19
- (GT) fever
- (GT) Anosmia
- (GT) Chest pain
- (GT) Chills

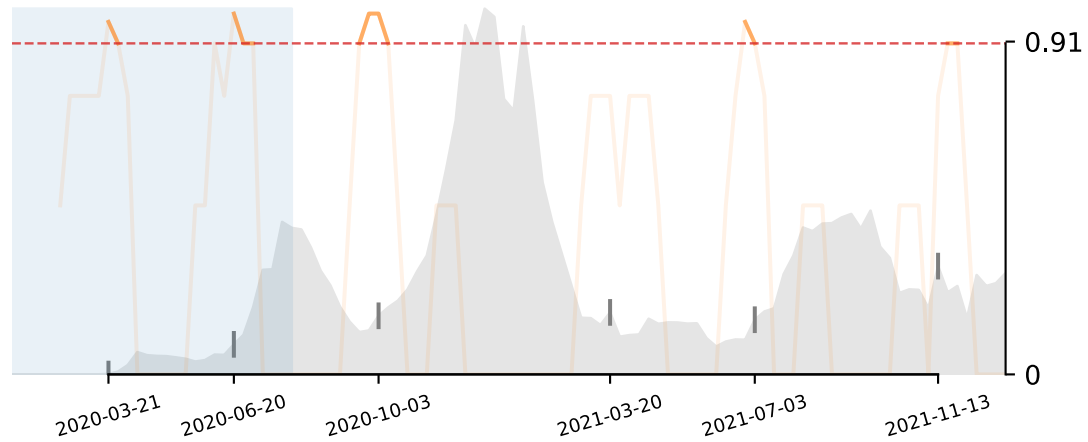

| $\beta$ | tp fp fn |   |   | tp fp fn |    |   |
|---------|----------|---|---|----------|----|---|
|         | 1.00     | 0 | 0 | 2        | 0  | 0 |
| 0.99    | 0        | 0 | 2 | 1        | 0  | 3 |
| 0.96    | 1        | 0 | 1 | 2        | 0  | 2 |
| 0.91    | 2        | 0 | 0 | 2        | 3  | 1 |
| 0.76    | 2        | 3 | 0 | 4        | 7  | 0 |
| 0.46    | 2        | 4 | 0 | 4        | 17 | 0 |
| 0.00    | 2        | 5 | 0 | 4        | 46 | 0 |

Model 3

- (JHU) cases
- (GT) covid-19
- (GT) fever
- (GT) Anosmia
- (GT) Chills
- (GT) Phlegm

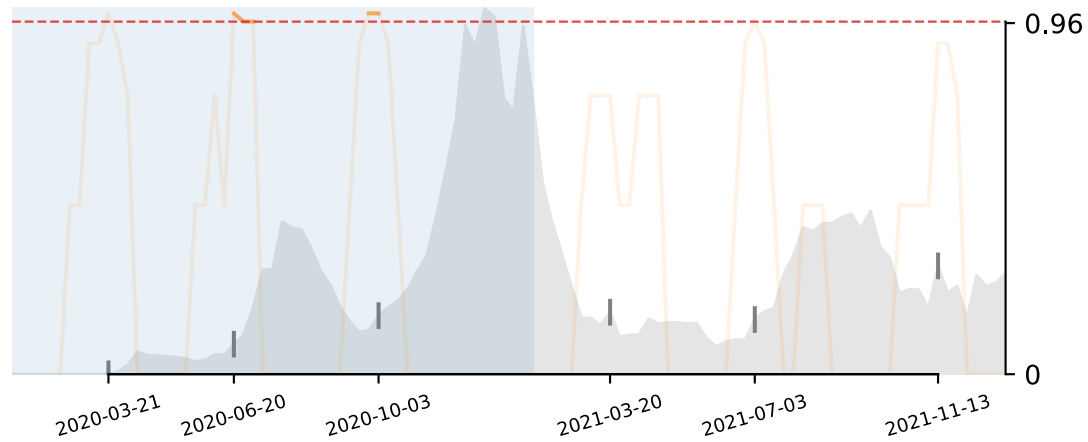

| $\beta$ | tp fp fn |   |   | tp fp fn |    |   |
|---------|----------|---|---|----------|----|---|
|         | 1.00     | 0 | 0 | 3        | 0  | 0 |
| 0.99    | 0        | 0 | 3 | 0        | 0  | 3 |
| 0.96    | 3        | 0 | 0 | 1        | 0  | 2 |
| 0.91    | 3        | 2 | 0 | 2        | 2  | 1 |
| 0.76    | 3        | 4 | 0 | 3        | 6  | 0 |
| 0.46    | 3        | 5 | 0 | 3        | 12 | 0 |
| 0.00    | 3        | 6 | 0 | 3        | 28 | 0 |

## Proxies selected by the Multiple Sources method

Model 1

- (JHU) cases
- (GT) covid
- (GT) covid-19
- (GT) covid symptoms
- (GT) quarantine
- (GT) Acute bronchitis

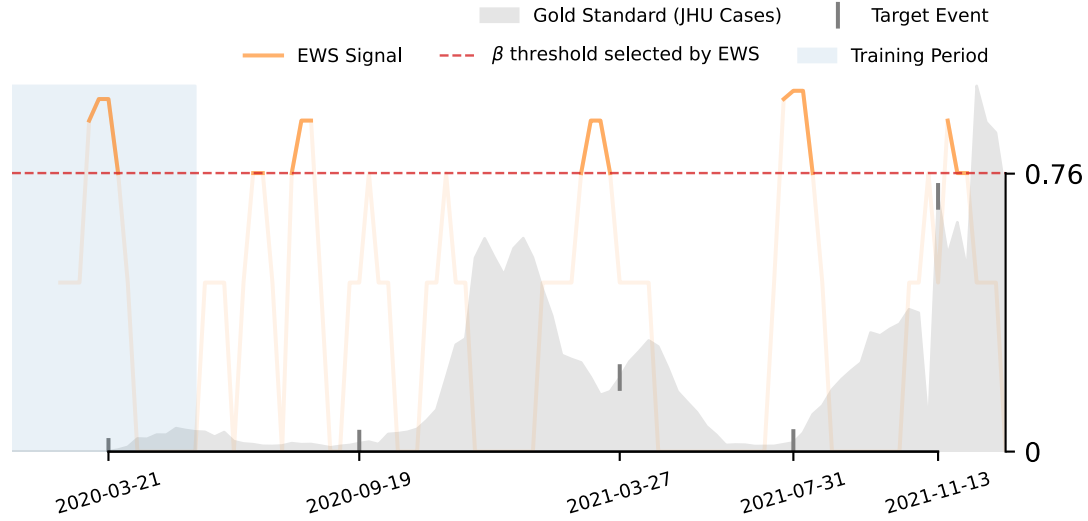

## Performance as a function of $\beta$

| $\beta$ | Training |    |    | Out of sample |    |    |
|---------|----------|----|----|---------------|----|----|
|         | tp       | fp | fn | tp            | fp | fn |
| 1.00    | 0        | 0  | 1  | 0             | 0  | 4  |
| 0.99    | 0        | 0  | 1  | 1             | 1  | 3  |
| 0.96    | 0        | 0  | 1  | 1             | 1  | 3  |
| 0.91    | 1        | 0  | 0  | 3             | 2  | 0  |
| 0.76    | 1        | 0  | 0  | 4             | 10 | 0  |
| 0.46    | 1        | 1  | 0  | 4             | 30 | 0  |
| 0.00    | 1        | 3  | 0  | 4             | 56 | 0  |

Model 2

- (GT) Acute bronchitis
- (GT) covid
- (GT) Shortness of breath

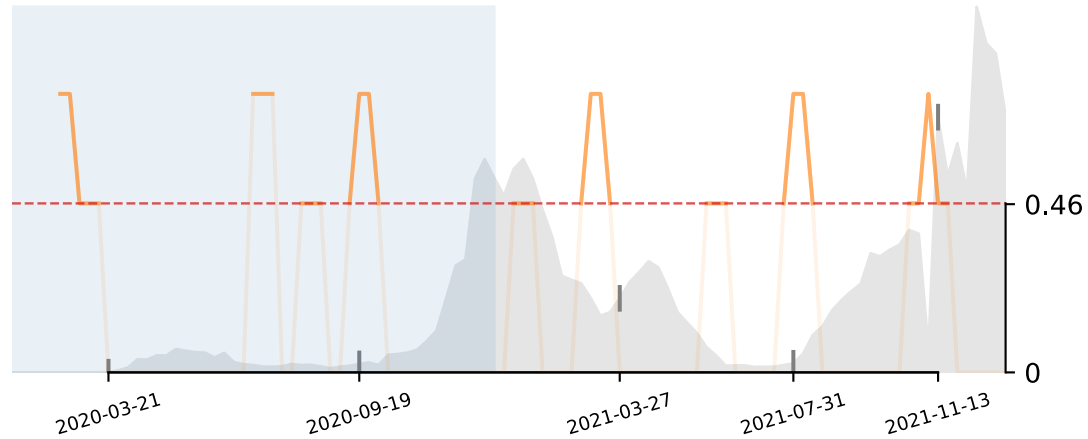

| $\beta$ | tp fp fn |   |   | tp fp fn |    |   |
|---------|----------|---|---|----------|----|---|
|         | 0.91     | 0 | 0 | 2        | 0  | 0 |
| 0.76    | 0        | 0 | 2 | 3        | 1  | 0 |
| 0.46    | 2        | 5 | 0 | 3        | 9  | 0 |
| 0.00    | 2        | 8 | 0 | 3        | 32 | 0 |

Model 3

- (GT) Acute bronchitis
- (GT) covid
- (GT) covid symptoms
- (GT) quarantine
- (GT) Shortness of breath
- (GT) Fever

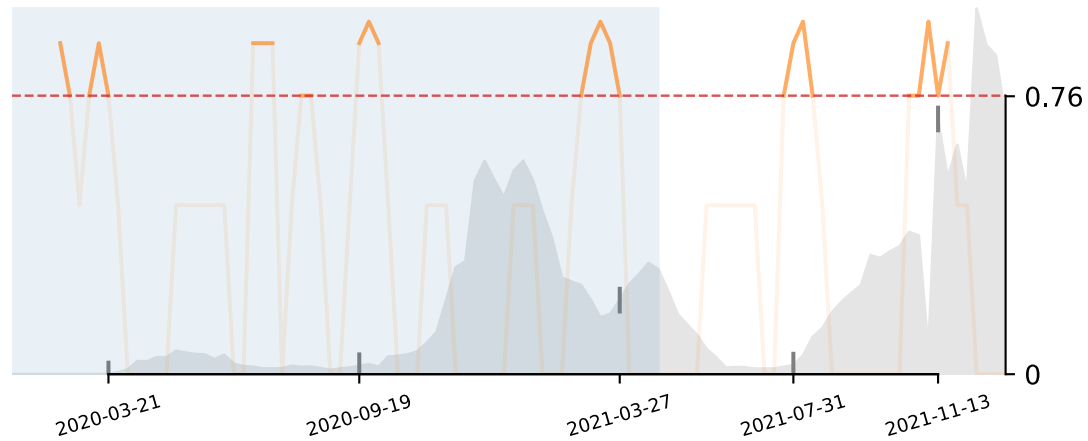

| $\beta$ | tp fp fn |    |   | tp fp fn |    |   |
|---------|----------|----|---|----------|----|---|
|         | 1.00     | 0  | 0 | 3        | 0  | 0 |
| 0.99    | 0        | 0  | 3 | 0        | 0  | 2 |
| 0.96    | 0        | 0  | 3 | 1        | 1  | 0 |
| 0.91    | 1        | 1  | 2 | 2        | 2  | 0 |
| 0.76    | 3        | 6  | 0 | 2        | 3  | 0 |
| 0.46    | 3        | 8  | 0 | 2        | 9  | 0 |
| 0.00    | 3        | 24 | 0 | 2        | 22 | 0 |

## Proxies selected by the Multiple Sources method

Model 1

- (JHU) cases
- (GT) covid
- (GT) covid-19
- (GT) covid symptoms
- (GT) chest tightness
- (GT) fever

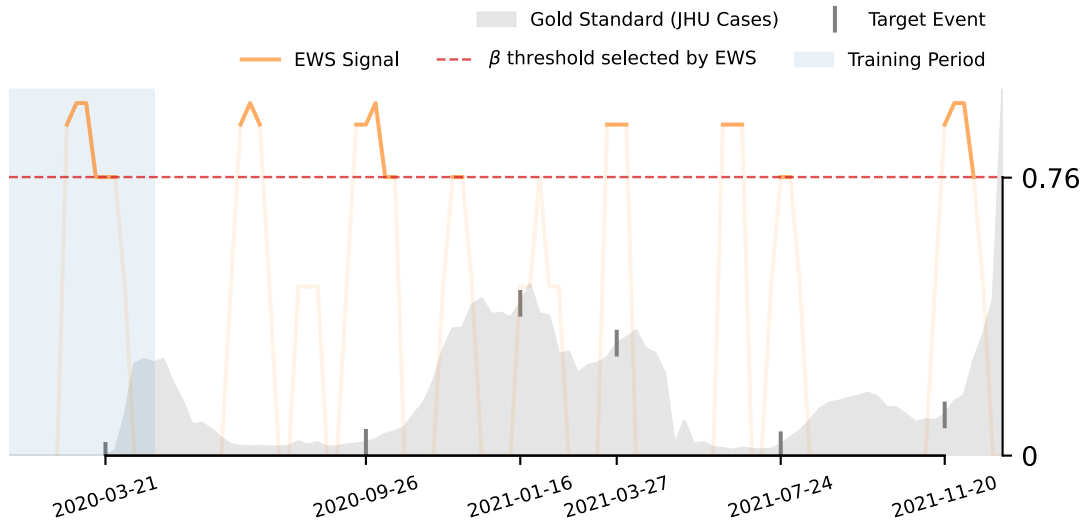

Model 2

- (GT) chest tightness
- (GT) covid symptoms
- (GT) Ageusia
- (GT) Anosmia
- (GT) Asthma
- (GT) Burning Chest Pain

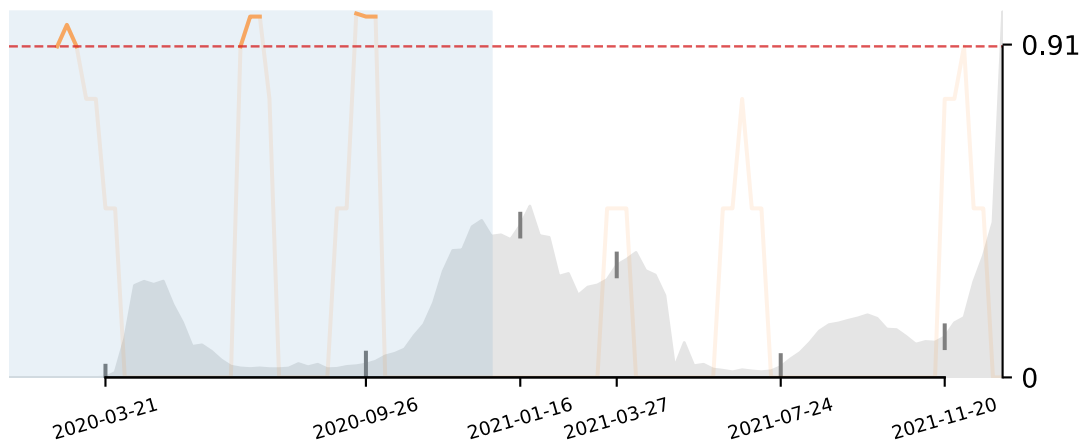

Model 3

- (GT) chest tightness
- (GT) covid symptoms
- (GT) nose bleed
- (GT) Acute bronchitis
- (GT) Ageusia
- (GT) Anosmia

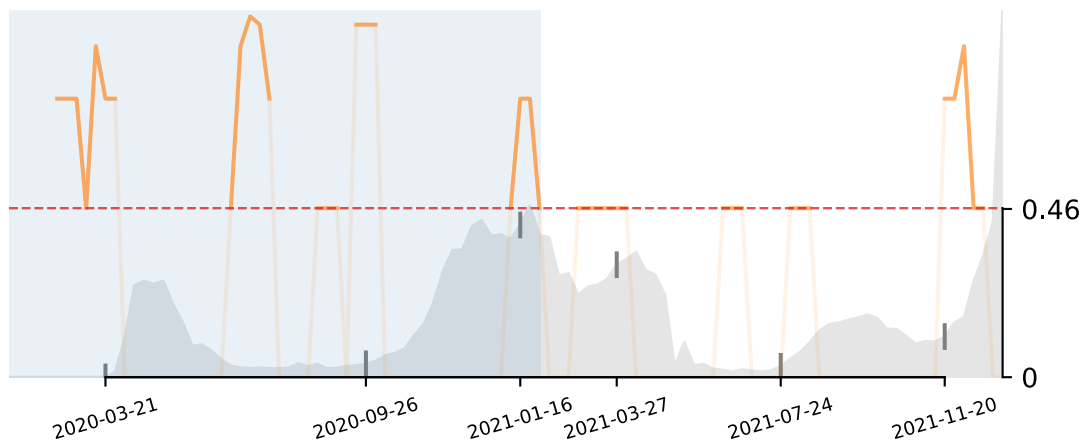

## Performance as a function of $\beta$

| $\beta$ | Training |    |    | Out of sample |    |    |
|---------|----------|----|----|---------------|----|----|
|         | tp       | fp | fn | tp            | fp | fn |
| 1.00    | 0        | 0  | 1  | 0             | 0  | 5  |
| 0.99    | 0        | 0  | 1  | 0             | 0  | 5  |
| 0.96    | 0        | 0  | 1  | 0             | 4  | 3  |
| 0.91    | 1        | 0  | 0  | 4             | 7  | 1  |
| 0.76    | 1        | 0  | 0  | 5             | 13 | 0  |
| 0.46    | 1        | 1  | 0  | 5             | 21 | 0  |
| 0.00    | 1        | 2  | 0  | 5             | 53 | 0  |

| $\beta$ | tp fp fn |   |   | tp fp fn |    |   |
|---------|----------|---|---|----------|----|---|
|         | 1.00     | 0 | 0 | 2        | 0  | 0 |
| 0.99    | 1        | 0 | 1 | 0        | 0  | 4 |
| 0.96    | 1        | 3 | 1 | 0        | 0  | 4 |
| 0.91    | 2        | 3 | 0 | 0        | 1  | 3 |
| 0.76    | 2        | 5 | 0 | 2        | 2  | 2 |
| 0.46    | 2        | 6 | 0 | 3        | 5  | 1 |
| 0.00    | 2        | 7 | 0 | 4        | 29 | 0 |

| $\beta$ | tp fp fn |    |   | tp fp fn |    |   |
|---------|----------|----|---|----------|----|---|
|         | 1.00     | 0  | 0 | 3        | 0  | 0 |
| 0.99    | 0        | 0  | 3 | 0        | 0  | 3 |
| 0.96    | 0        | 1  | 3 | 0        | 0  | 3 |
| 0.91    | 1        | 3  | 2 | 0        | 1  | 2 |
| 0.76    | 2        | 4  | 1 | 1        | 2  | 2 |
| 0.46    | 3        | 8  | 0 | 3        | 8  | 0 |
| 0.00    | 3        | 11 | 0 | 3        | 27 | 0 |



## Proxies selected by the Multiple Sources method

Model 1

- (GT) covid
- (GT) covid-19
- (GT) chest pain
- (GT) quarantine
- (GT) sars-cov-2
- (GT) Acute bronchitis

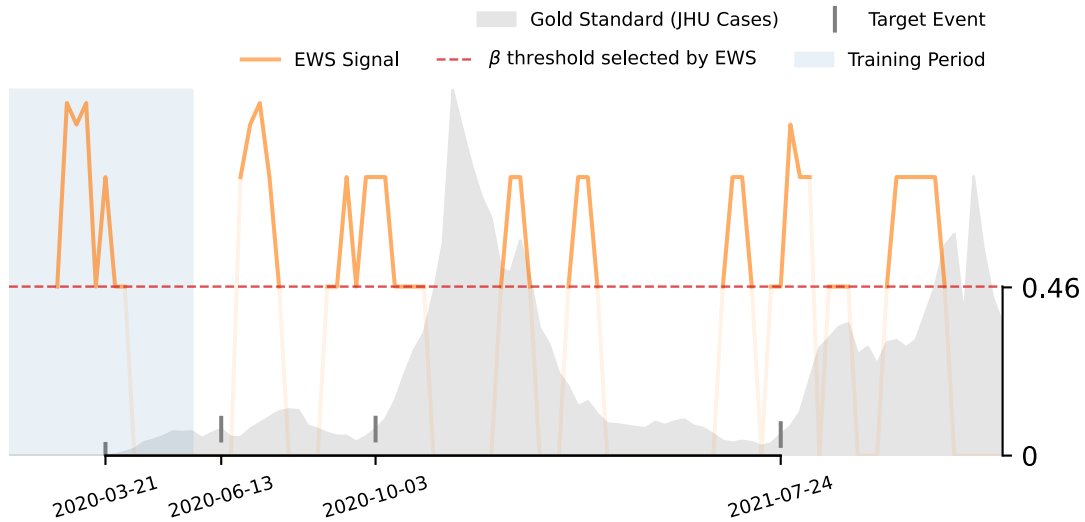

## Performance as a function of $\beta$

| $\beta$ | Training |    |    | Out of sample |    |    |
|---------|----------|----|----|---------------|----|----|
|         | tp       | fp | fn | tp            | fp | fn |
| 1.00    | 0        | 0  | 1  | 0             | 0  | 3  |
| 0.99    | 0        | 0  | 1  | 0             | 0  | 3  |
| 0.96    | 0        | 0  | 1  | 0             | 1  | 3  |
| 0.91    | 1        | 0  | 0  | 0             | 3  | 2  |
| 0.76    | 1        | 0  | 0  | 2             | 17 | 0  |
| 0.46    | 1        | 0  | 0  | 2             | 31 | 0  |
| 0.00    | 1        | 3  | 0  | 3             | 67 | 0  |

Model 2

- (GT) Otitis
- (GT) covid symptoms
- (GT) Chest pain
- (GT) Fever

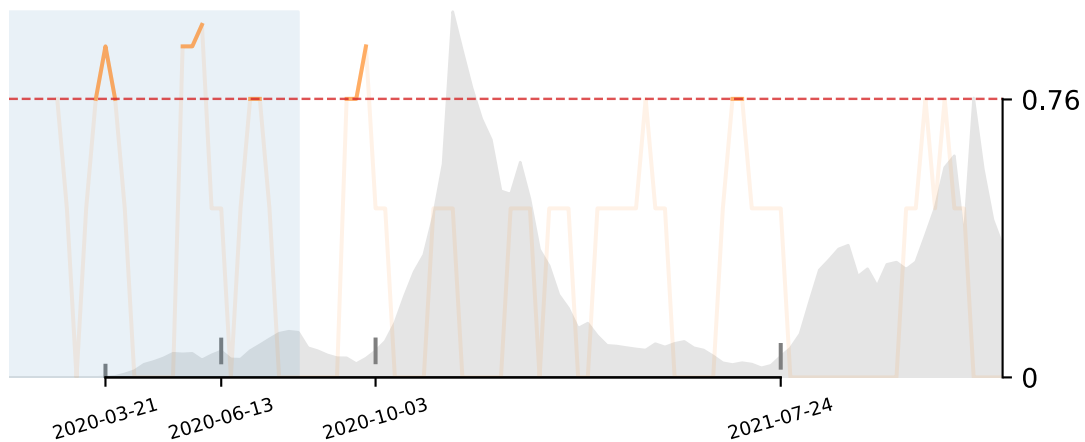

| $\beta$ | tp |    |    | fp |    |    | fn |    |    |
|---------|----|----|----|----|----|----|----|----|----|
|         | tp | fp | fn | tp | fp | fn | tp | fp | fn |
| 0.96    | 0  | 0  | 2  | 0  | 0  | 2  | 0  | 0  | 2  |
| 0.91    | 1  | 0  | 1  | 1  | 0  | 1  | 1  | 0  | 1  |
| 0.76    | 2  | 0  | 0  | 2  | 3  | 0  | 2  | 25 | 0  |
| 0.46    | 2  | 4  | 0  | 2  | 25 | 0  | 2  | 59 | 0  |
| 0.00    | 2  | 7  | 0  | 2  | 59 | 0  | 2  | 59 | 0  |

Model 3

- (GT) Otitis
- (GT) covid symptoms
- (GT) Fever
- (GT) chest pain
- (GT) Asphyxia
- (GT) Vomiting

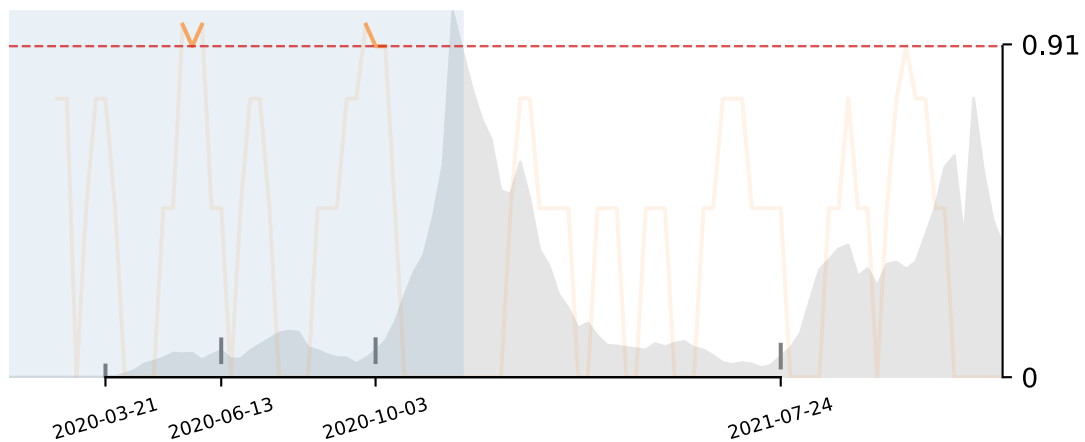

| $\beta$ | tp |    |    | fp |    |    | fn |    |    |
|---------|----|----|----|----|----|----|----|----|----|
|         | tp | fp | fn | tp | fp | fn | tp | fp | fn |
| 1.00    | 0  | 0  | 3  | 0  | 0  | 1  | 0  | 0  | 1  |
| 0.99    | 0  | 0  | 3  | 0  | 0  | 1  | 0  | 0  | 1  |
| 0.96    | 0  | 0  | 3  | 0  | 0  | 1  | 0  | 0  | 1  |
| 0.91    | 2  | 0  | 1  | 0  | 1  | 1  | 0  | 1  | 1  |
| 0.76    | 2  | 1  | 1  | 1  | 7  | 0  | 1  | 27 | 0  |
| 0.46    | 3  | 4  | 0  | 1  | 27 | 0  | 1  | 27 | 0  |
| 0.00    | 3  | 12 | 0  | 1  | 49 | 0  | 1  | 49 | 0  |

## Proxies selected by the Multiple Sources method

Model 1

- (GT) covid
- (GT) how long does covid last
- (GT) loss smell
- (GT) covid-19
- (GT) loss taste
- (GT) chest pain

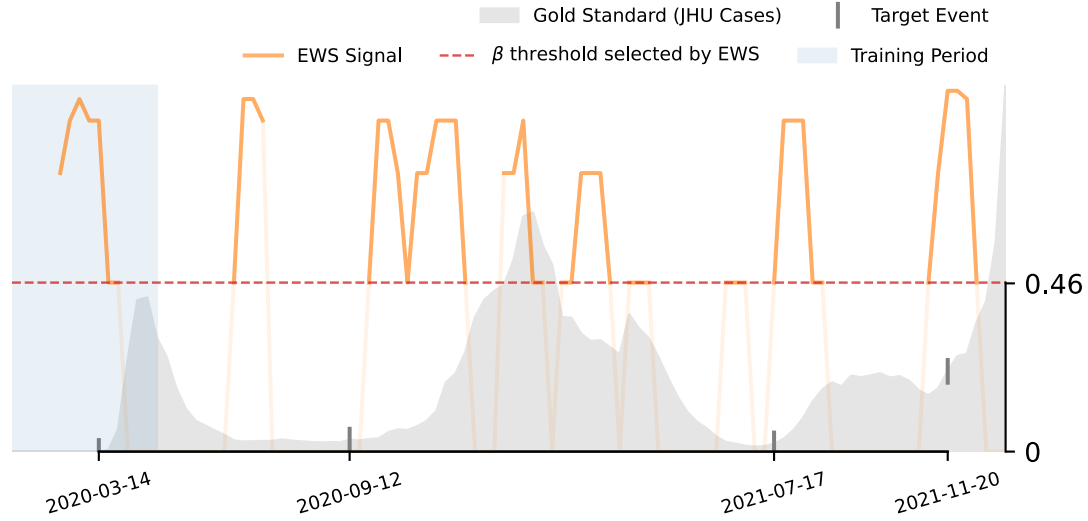

## Performance as a function of $\beta$

| $\beta$ | Training |    |    | Out of sample |    |    |
|---------|----------|----|----|---------------|----|----|
|         | tp       | fp | fn | tp            | fp | fn |
| 1.00    | 0        | 0  | 1  | 0             | 0  | 3  |
| 0.99    | 0        | 0  | 1  | 1             | 1  | 2  |
| 0.96    | 0        | 0  | 1  | 1             | 4  | 2  |
| 0.91    | 1        | 0  | 0  | 1             | 14 | 1  |
| 0.76    | 1        | 0  | 0  | 1             | 22 | 1  |
| 0.46    | 1        | 0  | 0  | 2             | 37 | 0  |
| 0.00    | 1        | 2  | 0  | 3             | 67 | 0  |

Model 2

- (GT) nose bleed
- (GT) sars-cov-2
- (GT) Anosmia
- (GT) Asthma
- (GT) Burning Chest Pain
- (GT) Pneumonia

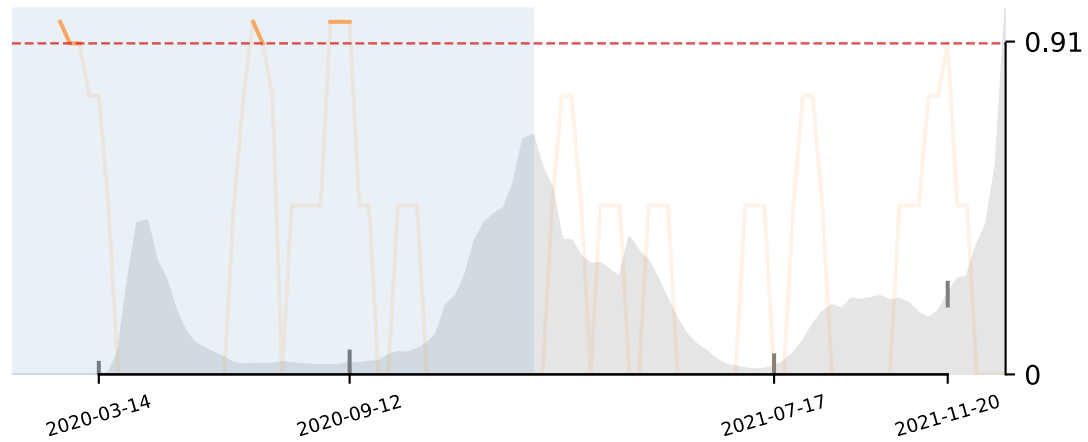

| $\beta$ | tp fp fn |    |   | tp fp fn |    |   |
|---------|----------|----|---|----------|----|---|
|         | 1.00     | 0  | 0 | 2        | 0  | 0 |
| 0.99    | 0        | 0  | 2 | 0        | 0  | 2 |
| 0.96    | 0        | 0  | 2 | 0        | 0  | 2 |
| 0.91    | 2        | 1  | 0 | 1        | 0  | 1 |
| 0.76    | 2        | 2  | 0 | 1        | 4  | 1 |
| 0.46    | 2        | 4  | 0 | 2        | 16 | 0 |
| 0.00    | 2        | 13 | 0 | 2        | 35 | 0 |

Model 3

- (GT) Asthma
- (GT) covid symptoms
- (GT) covid-19 who
- (GT) Anosmia
- (GT) Bronchitis
- (GT) Burning Chest Pain

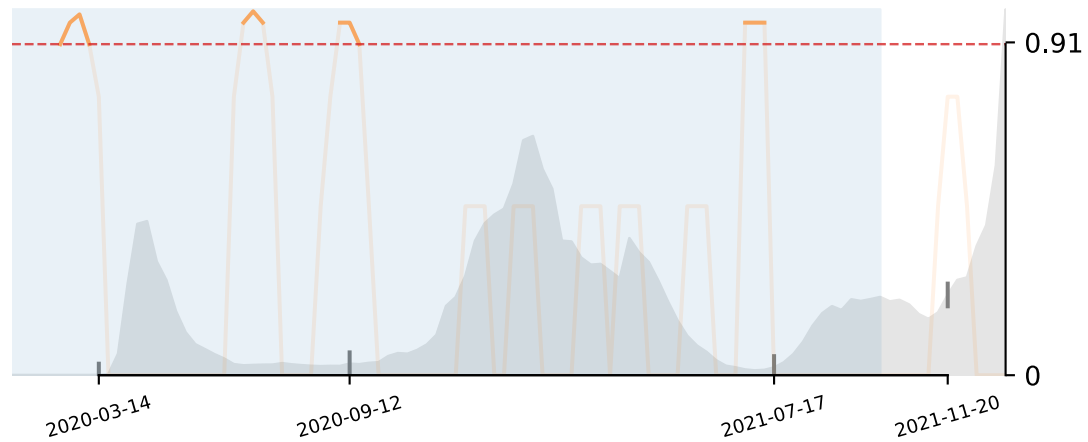

| $\beta$ | tp fp fn |    |   | tp fp fn |   |   |
|---------|----------|----|---|----------|---|---|
|         | 1.00     | 0  | 0 | 3        | 0 | 0 |
| 0.99    | 0        | 1  | 3 | 0        | 0 | 1 |
| 0.96    | 1        | 1  | 2 | 0        | 0 | 1 |
| 0.91    | 3        | 3  | 0 | 0        | 0 | 1 |
| 0.76    | 3        | 4  | 0 | 1        | 1 | 0 |
| 0.46    | 3        | 6  | 0 | 1        | 2 | 0 |
| 0.00    | 3        | 22 | 0 | 1        | 6 | 0 |

## Proxies selected by the Multiple Sources method

Model 1

- (JHU) cases
- (GT) sars-cov-2
- (GT) covid
- (GT) covid-19
- (GT) chest pain
- (GT) covid symptoms

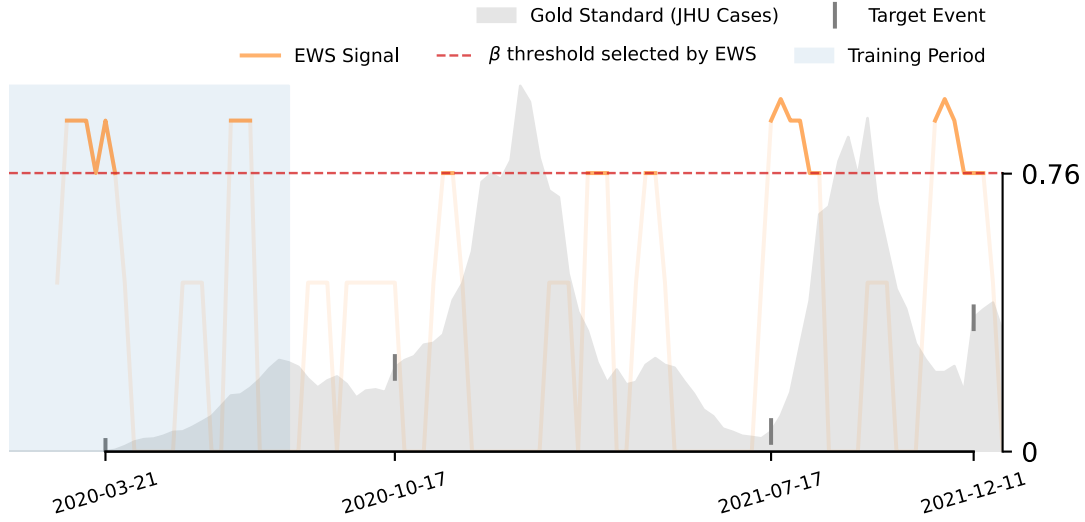

Model 2

- (GT) chest pain
- (GT) covid symptoms
- (GT) Acute bronchitis
- (GT) Ageusia
- (GT) Anosmia
- (GT) Bronchitis

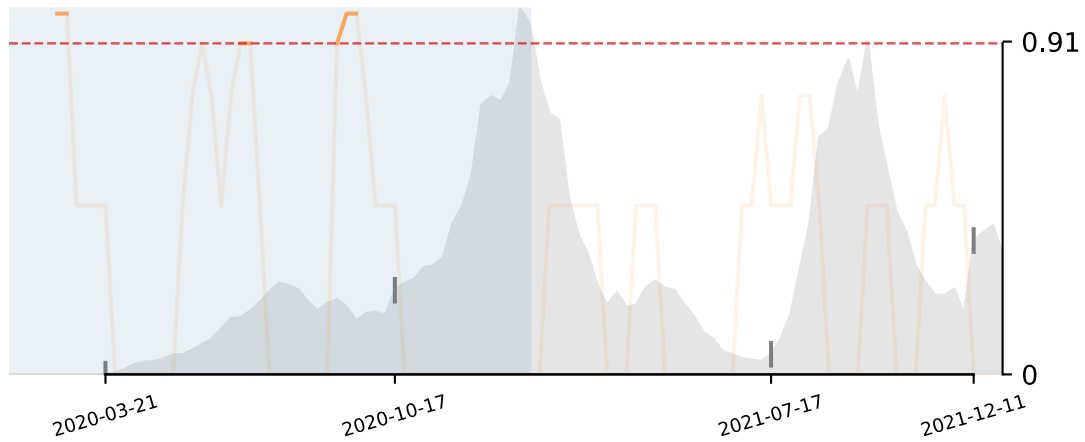

Model 3

- (GT) Bronchitis
- (GT) Throat irritation
- (GT) covid symptoms
- (GT) Cough
- (GT) Nasal congestion
- (GT) Phlegm

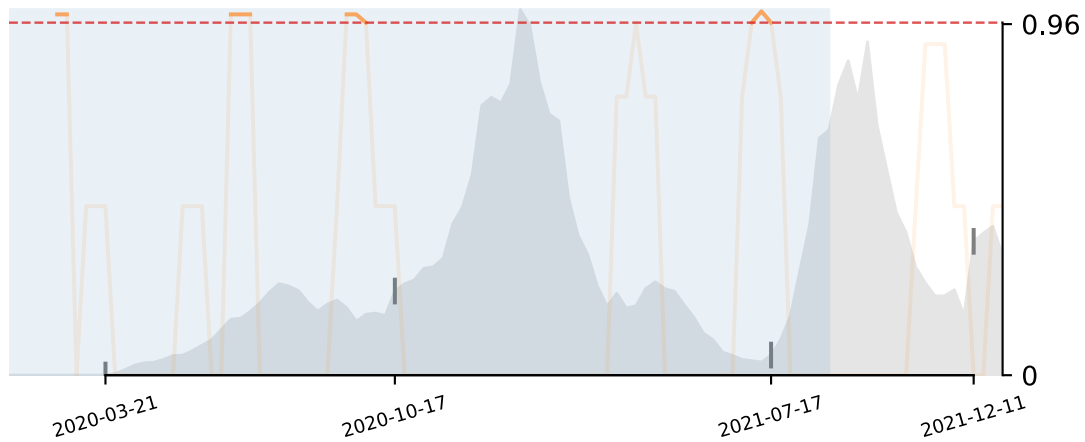

## Performance as a function of $\beta$

| $\beta$ | Training |    |    | Out of sample |    |    |
|---------|----------|----|----|---------------|----|----|
|         | tp       | fp | fn | tp            | fp | fn |
| 1.00    | 0        | 0  | 1  | 0             | 0  | 3  |
| 0.99    | 0        | 0  | 1  | 0             | 0  | 3  |
| 0.96    | 0        | 0  | 1  | 1             | 1  | 1  |
| 0.91    | 0        | 0  | 1  | 2             | 3  | 1  |
| 0.76    | 1        | 3  | 0  | 2             | 13 | 1  |
| 0.46    | 1        | 4  | 0  | 3             | 27 | 0  |
| 0.00    | 1        | 9  | 0  | 3             | 53 | 0  |

| $\beta$ | tp |    |    | fp |    |    | fn |    |    |
|---------|----|----|----|----|----|----|----|----|----|
|         | tp | fp | fn | tp | fp | fn | tp | fp | fn |
| 1.00    | 0  | 0  | 2  | 0  | 0  | 2  | 0  | 0  | 2  |
| 0.99    | 0  | 0  | 2  | 0  | 0  | 2  | 0  | 0  | 2  |
| 0.96    | 2  | 2  | 0  | 0  | 0  | 2  | 0  | 0  | 2  |
| 0.91    | 2  | 2  | 0  | 0  | 0  | 2  | 0  | 0  | 2  |
| 0.76    | 2  | 6  | 0  | 2  | 2  | 0  | 2  | 17 | 0  |
| 0.46    | 2  | 9  | 0  | 2  | 17 | 0  | 2  | 35 | 0  |
| 0.00    | 2  | 12 | 0  | 2  | 35 | 0  | 2  | 35 | 0  |

| $\beta$ | tp |    |    | fp |    |    | fn |    |    |
|---------|----|----|----|----|----|----|----|----|----|
|         | tp | fp | fn | tp | fp | fn | tp | fp | fn |
| 1.00    | 0  | 0  | 3  | 0  | 0  | 1  | 0  | 0  | 1  |
| 0.99    | 1  | 0  | 2  | 0  | 0  | 1  | 0  | 0  | 1  |
| 0.96    | 3  | 5  | 0  | 0  | 0  | 1  | 0  | 0  | 1  |
| 0.91    | 3  | 6  | 0  | 1  | 0  | 0  | 1  | 0  | 0  |
| 0.76    | 3  | 6  | 0  | 1  | 0  | 0  | 1  | 2  | 0  |
| 0.46    | 3  | 11 | 0  | 1  | 2  | 0  | 1  | 11 | 0  |
| 0.00    | 3  | 15 | 0  | 1  | 11 | 0  | 1  | 11 | 0  |

## Proxies selected by the Multiple Sources method

Model 1

- (JHU) cases
- (GT) covid
- (GT) covid-19
- (GT) quarantine
- (GT) Acute bronchitis
- (GT) Chills

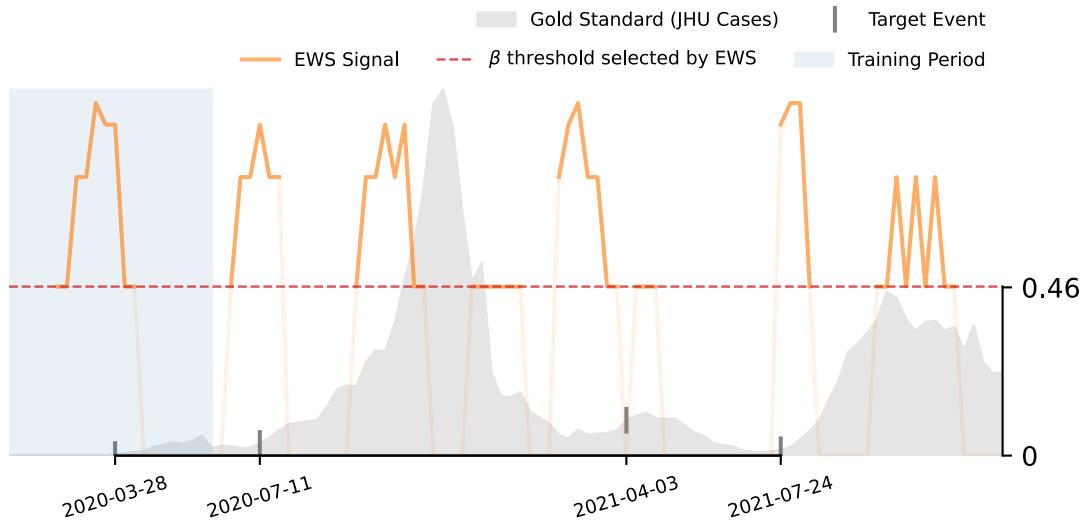

## Performance as a function of $\beta$

| $\beta$ | Training |    |    | Out of sample |    |    |
|---------|----------|----|----|---------------|----|----|
|         | tp       | fp | fn | tp            | fp | fn |
| 1.00    | 0        | 0  | 1  | 0             | 0  | 3  |
| 0.99    | 0        | 0  | 1  | 0             | 0  | 3  |
| 0.96    | 0        | 0  | 1  | 1             | 2  | 1  |
| 0.91    | 1        | 0  | 0  | 3             | 4  | 0  |
| 0.76    | 1        | 0  | 0  | 3             | 13 | 0  |
| 0.46    | 1        | 0  | 0  | 3             | 32 | 0  |
| 0.00    | 1        | 4  | 0  | 3             | 63 | 0  |

Model 2

- (JHU) cases
- (GT) covid
- (GT) covid-19
- (GT) covid symptoms
- (GT) quarantine
- (GT) Cough

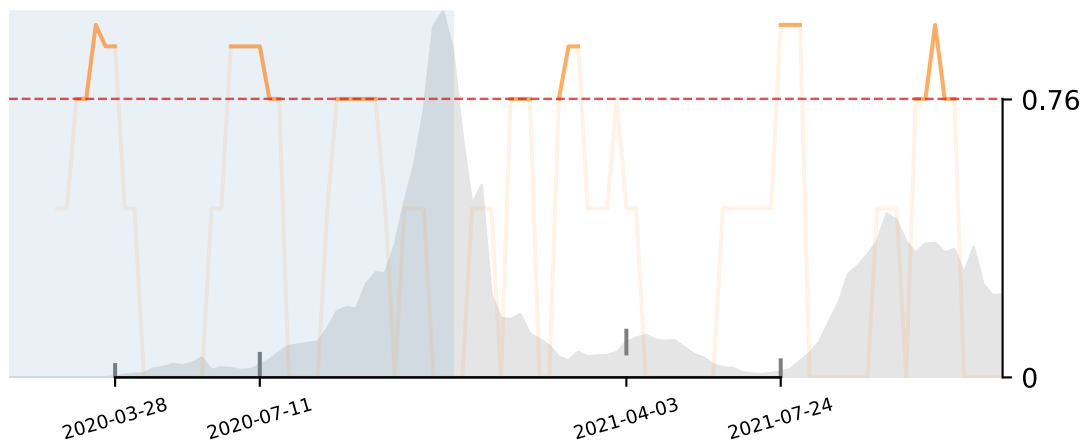

| $\beta$ | tp fp fn |    |   | tp fp fn |    |   |
|---------|----------|----|---|----------|----|---|
|         | 1.00     | 0  | 0 | 2        | 0  | 0 |
| 0.99    | 0        | 0  | 2 | 0        | 0  | 2 |
| 0.96    | 0        | 0  | 2 | 1        | 3  | 1 |
| 0.91    | 1        | 0  | 1 | 2        | 3  | 0 |
| 0.76    | 2        | 0  | 0 | 2        | 11 | 0 |
| 0.46    | 2        | 7  | 0 | 2        | 18 | 0 |
| 0.00    | 2        | 17 | 0 | 2        | 43 | 0 |

Model 3

- (JHU) cases
- (GT) quarantine
- (GT) Cough
- (GT) Nasal congestion
- (GT) Acute bronchitis
- (GT) covid

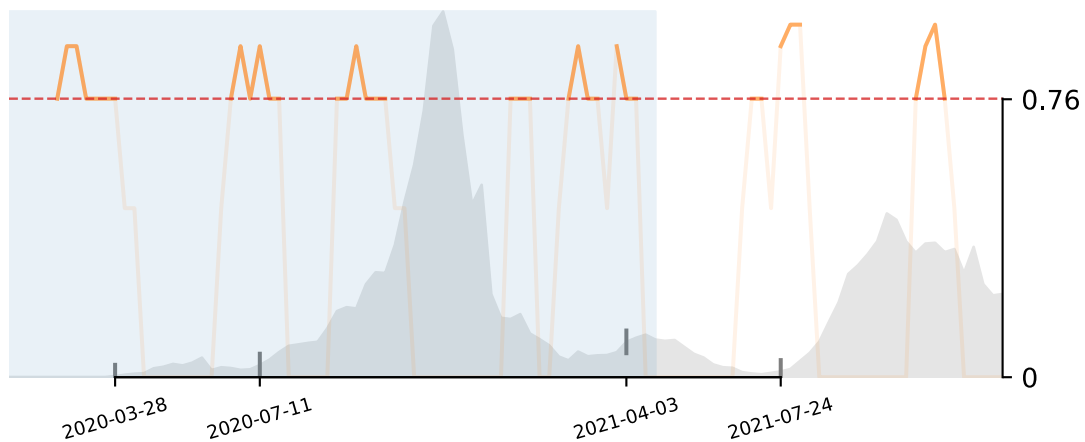

| $\beta$ | tp fp fn |    |   | tp fp fn |    |   |
|---------|----------|----|---|----------|----|---|
|         | 1.00     | 0  | 0 | 3        | 0  | 0 |
| 0.99    | 0        | 0  | 3 | 0        | 0  | 1 |
| 0.96    | 0        | 0  | 3 | 0        | 3  | 0 |
| 0.91    | 0        | 0  | 3 | 1        | 4  | 0 |
| 0.76    | 3        | 3  | 0 | 1        | 6  | 0 |
| 0.46    | 3        | 16 | 0 | 1        | 8  | 0 |
| 0.00    | 3        | 21 | 0 | 1        | 29 | 0 |

## Proxies selected by the Multiple Sources method

Model 1

- (GT) covid
- (GT) how long does covid last
- (GT) covid-19
- (GT) chest pain
- (GT) covid symptoms
- (GT) chest tightness

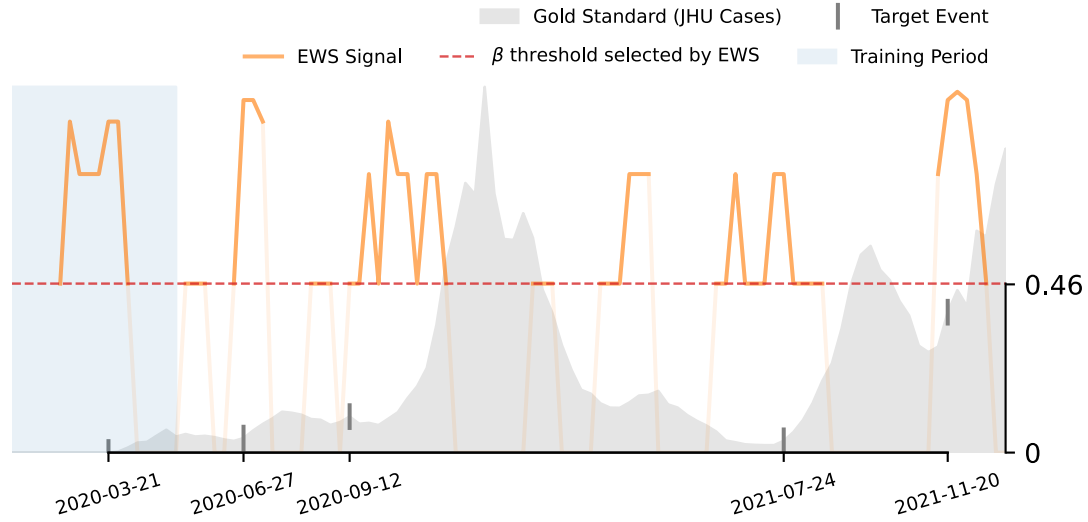

## Performance as a function of $\beta$

| $\beta$ | Training |    |    | Out of sample |    |    |
|---------|----------|----|----|---------------|----|----|
|         | tp       | fp | fn | tp            | fp | fn |
| 1.00    | 0        | 0  | 1  | 0             | 0  | 4  |
| 0.99    | 0        | 0  | 1  | 0             | 1  | 3  |
| 0.96    | 0        | 0  | 1  | 2             | 3  | 2  |
| 0.91    | 0        | 0  | 1  | 2             | 5  | 2  |
| 0.76    | 1        | 1  | 0  | 3             | 14 | 0  |
| 0.46    | 1        | 1  | 0  | 4             | 30 | 0  |
| 0.00    | 1        | 3  | 0  | 4             | 58 | 0  |

Model 2

- (GT) covid
- (GT) covid-19
- (GT) chest pain
- (GT) covid symptoms
- (GT) chest tightness
- (GT) covid-19 who

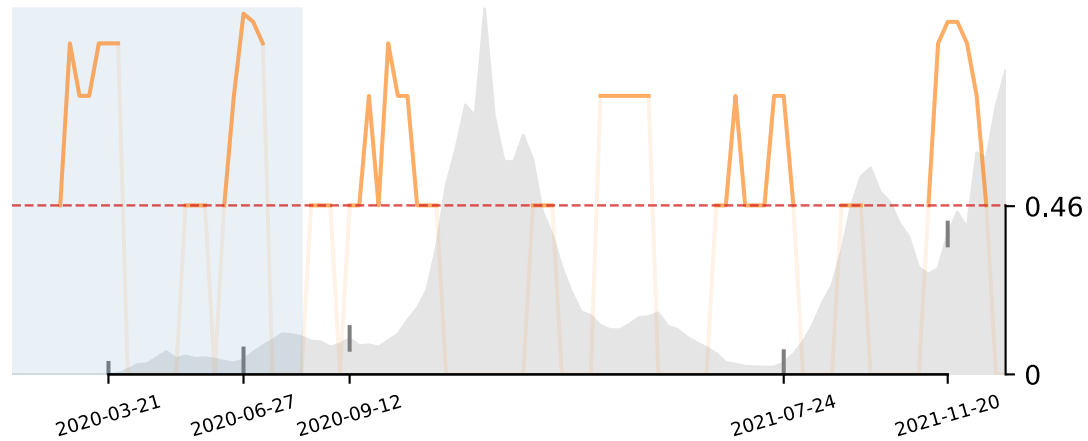

| $\beta$ | tp fp fn |   |   | tp fp fn |    |   |
|---------|----------|---|---|----------|----|---|
|         | 1.00     | 0 | 0 | 2        | 0  | 0 |
| 0.99    | 0        | 0 | 2 | 0        | 0  | 3 |
| 0.96    | 1        | 0 | 1 | 1        | 1  | 2 |
| 0.91    | 1        | 1 | 1 | 1        | 3  | 2 |
| 0.76    | 2        | 3 | 0 | 2        | 13 | 0 |
| 0.46    | 2        | 3 | 0 | 3        | 27 | 0 |
| 0.00    | 2        | 6 | 0 | 3        | 54 | 0 |

Model 3

- (GT) covid symptoms
- (GT) Burning Chest Pain
- (GT) Nasal congestion
- (GT) chest tightness
- (GT) Bronchitis
- (GT) Throat irritation

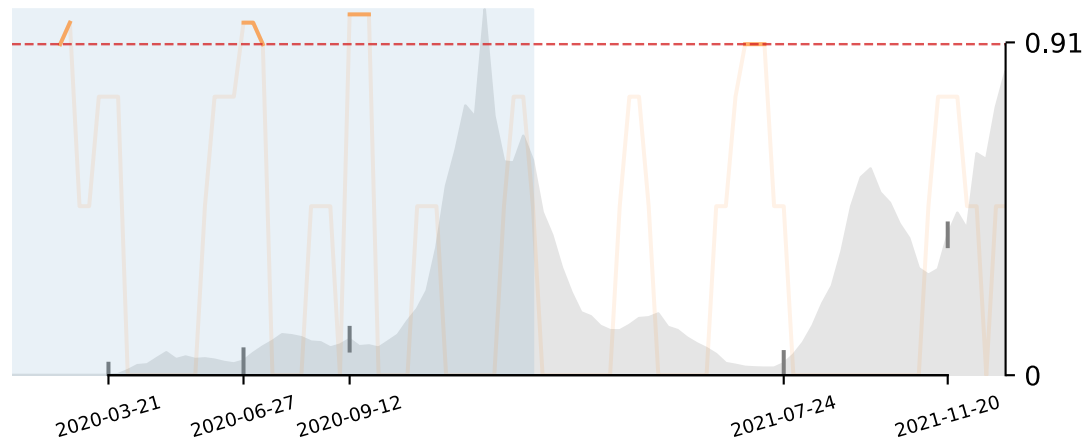

| $\beta$ | tp fp fn |    |   | tp fp fn |    |   |
|---------|----------|----|---|----------|----|---|
|         | 1.00     | 0  | 0 | 3        | 0  | 0 |
| 0.99    | 0        | 0  | 3 | 0        | 0  | 2 |
| 0.96    | 1        | 2  | 2 | 0        | 0  | 2 |
| 0.91    | 3        | 3  | 0 | 1        | 0  | 1 |
| 0.76    | 3        | 5  | 0 | 2        | 3  | 0 |
| 0.46    | 3        | 8  | 0 | 2        | 10 | 0 |
| 0.00    | 3        | 13 | 0 | 2        | 35 | 0 |

## Proxies selected by the Multiple Sources method

Model 1

- (JHU) cases
- (GT) covid
- (GT) how long does covid last
- (GT) covid-19
- (GT) chest pain
- (GT) covid symptoms

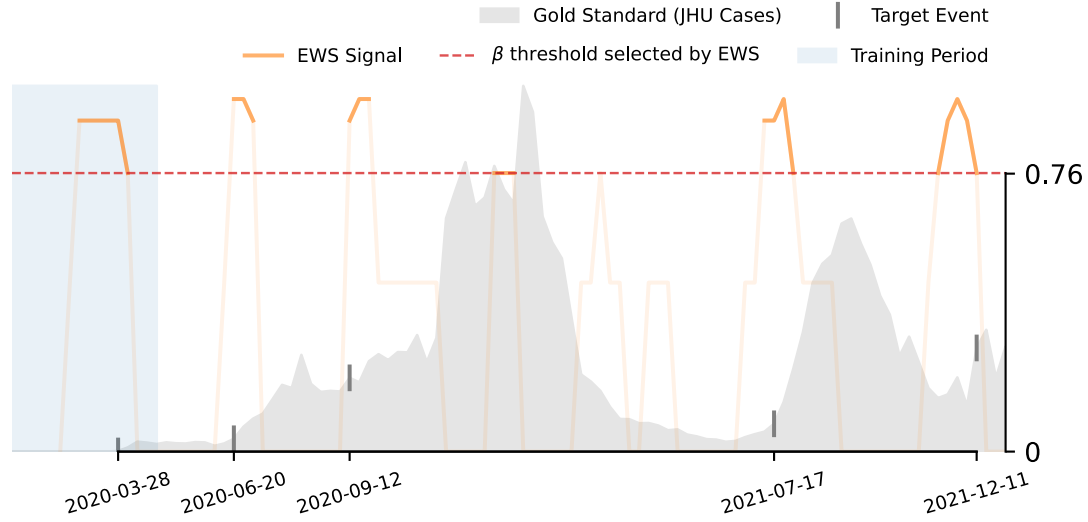

Model 2

- (GT) covid
- (GT) covid-19
- (GT) chest pain
- (GT) covid symptoms
- (GT) Acute bronchitis
- (GT) Ageusia

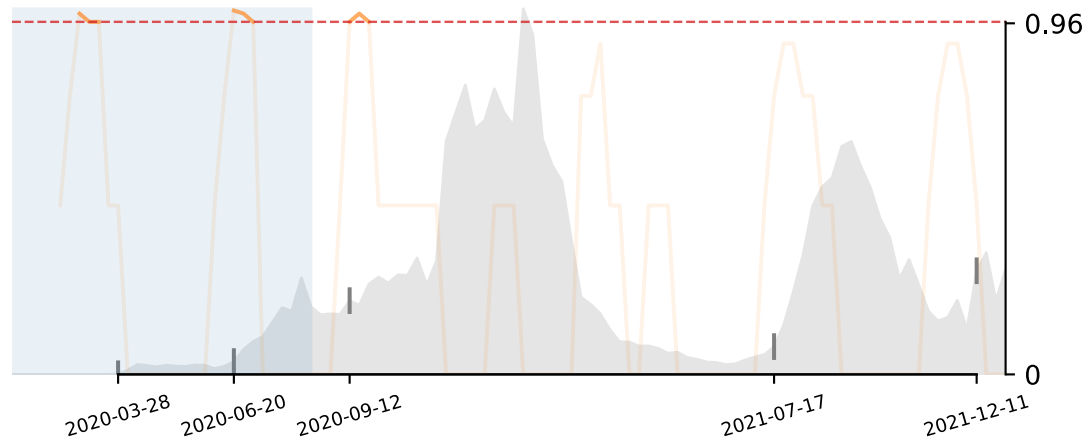

Model 3

- (GT) Acute bronchitis
- (GT) Ageusia
- (GT) Anosmia
- (GT) chest pain
- (GT) covid symptoms
- (GT) Chills

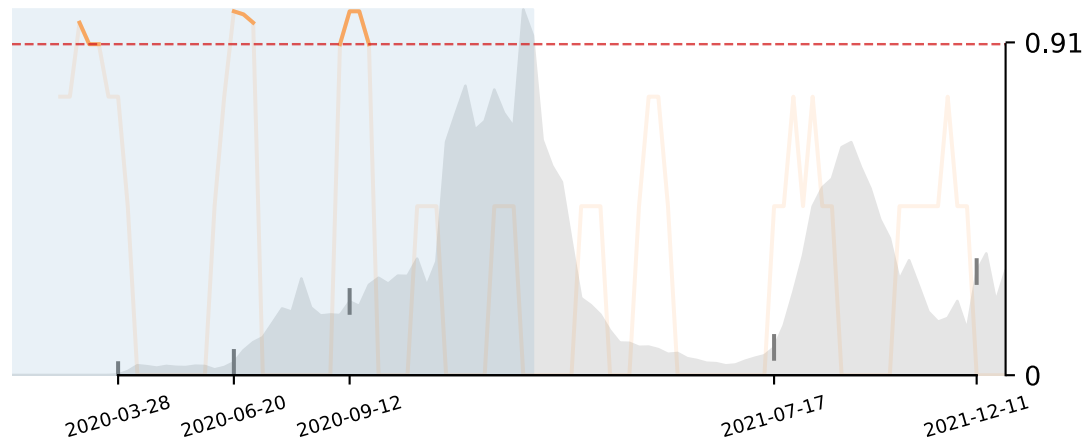

## Performance as a function of $\beta$

| $\beta$ | Training |    |    | Out of sample |    |    |
|---------|----------|----|----|---------------|----|----|
|         | tp       | fp | fn | tp            | fp | fn |
| 1.00    | 0        | 0  | 1  | 0             | 0  | 4  |
| 0.99    | 0        | 0  | 1  | 0             | 0  | 4  |
| 0.96    | 0        | 0  | 1  | 2             | 4  | 0  |
| 0.91    | 0        | 0  | 1  | 4             | 5  | 0  |
| 0.76    | 1        | 0  | 0  | 4             | 10 | 0  |
| 0.46    | 1        | 1  | 0  | 4             | 28 | 0  |
| 0.00    | 1        | 2  | 0  | 4             | 60 | 0  |

| $\beta$ | tp fp fn |   |   | tp fp fn |    |   |
|---------|----------|---|---|----------|----|---|
|         | 1.00     | 0 | 0 | 2        | 0  | 0 |
| 0.99    | 1        | 0 | 1 | 0        | 1  | 2 |
| 0.96    | 2        | 1 | 0 | 1        | 2  | 2 |
| 0.91    | 2        | 2 | 0 | 2        | 5  | 0 |
| 0.76    | 2        | 2 | 0 | 3        | 9  | 0 |
| 0.46    | 2        | 3 | 0 | 3        | 26 | 0 |
| 0.00    | 2        | 4 | 0 | 3        | 54 | 0 |

| $\beta$ | tp fp fn |    |   | tp fp fn |    |   |
|---------|----------|----|---|----------|----|---|
|         | 1.00     | 0  | 0 | 3        | 0  | 0 |
| 0.99    | 2        | 1  | 1 | 0        | 0  | 2 |
| 0.96    | 2        | 2  | 1 | 0        | 0  | 2 |
| 0.91    | 3        | 3  | 0 | 0        | 0  | 2 |
| 0.76    | 3        | 4  | 0 | 1        | 4  | 0 |
| 0.46    | 3        | 6  | 0 | 2        | 15 | 0 |
| 0.00    | 3        | 13 | 0 | 2        | 35 | 0 |

## Proxies selected by the Multiple Sources method

Model 1

- (JHU) cases
- (GT) covid-19 who
- (GT) covid
- (GT) covid-19
- (GT) chest pain
- (GT) covid symptoms

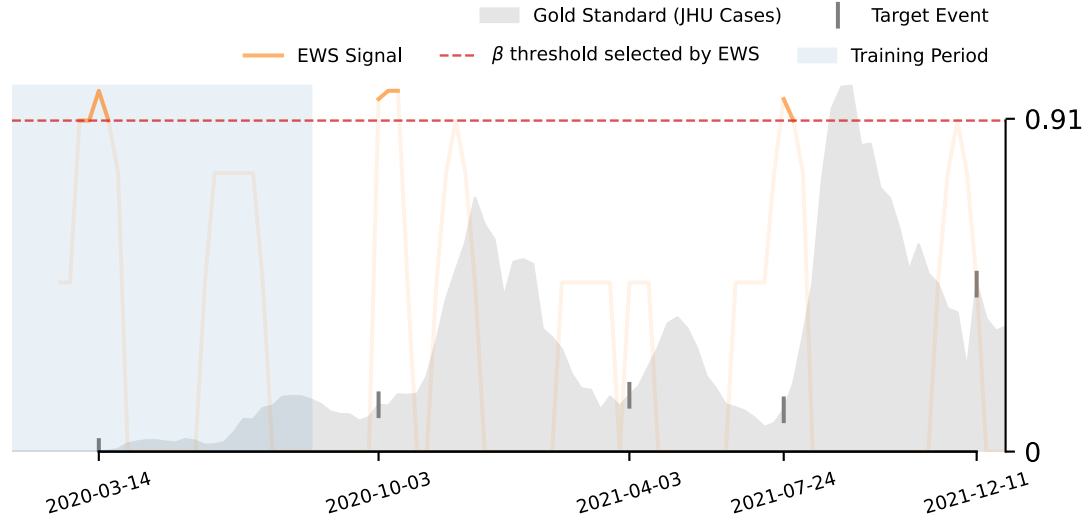

## Performance as a function of $\beta$

| $\beta$ | Training |    |    | Out of sample |    |    |
|---------|----------|----|----|---------------|----|----|
|         | tp       | fp | fn | tp            | fp | fn |
| 1.00    | 0        | 0  | 1  | 0             | 0  | 4  |
| 0.99    | 0        | 0  | 1  | 0             | 2  | 3  |
| 0.96    | 1        | 0  | 0  | 2             | 2  | 2  |
| 0.91    | 1        | 0  | 0  | 3             | 4  | 1  |
| 0.76    | 1        | 1  | 0  | 3             | 7  | 1  |
| 0.46    | 1        | 7  | 0  | 4             | 13 | 0  |
| 0.00    | 1        | 9  | 0  | 4             | 44 | 0  |

Model 2

- (JHU) cases
- (GT) covid symptoms
- (GT) quarantine
- (GT) covid-19 who
- (GT) fever
- (GT) Anosmia

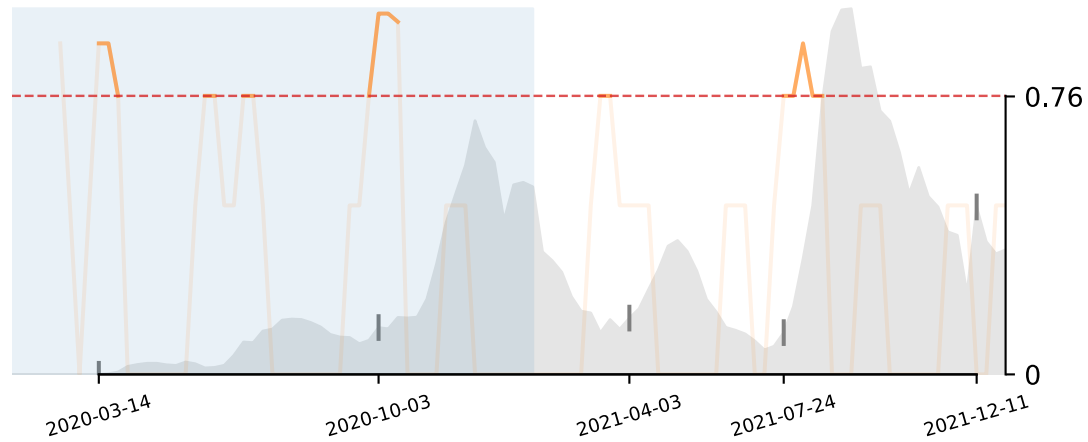

| $\beta$ | tp fp fn |    |   | tp fp fn |    |   |
|---------|----------|----|---|----------|----|---|
|         | 1.00     | 0  | 0 | 2        | 0  | 0 |
| 0.99    | 0        | 0  | 2 | 0        | 0  | 3 |
| 0.96    | 1        | 1  | 1 | 0        | 0  | 3 |
| 0.91    | 1        | 2  | 1 | 0        | 1  | 2 |
| 0.76    | 2        | 3  | 0 | 2        | 4  | 1 |
| 0.46    | 2        | 8  | 0 | 3        | 11 | 0 |
| 0.00    | 2        | 15 | 0 | 3        | 28 | 0 |

Model 3

- (JHU) cases
- (GT) covid symptoms
- (GT) fever
- (GT) Cough
- (GT) Fever
- (GT) Hyperventilation

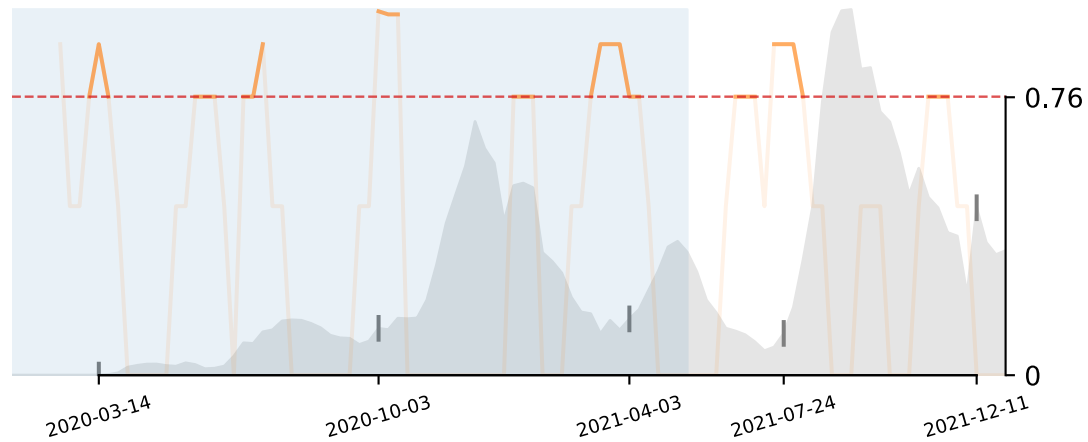

| $\beta$ | tp fp fn |    |   | tp fp fn |    |   |
|---------|----------|----|---|----------|----|---|
|         | 1.00     | 0  | 0 | 3        | 0  | 0 |
| 0.99    | 1        | 0  | 2 | 0        | 0  | 2 |
| 0.96    | 1        | 2  | 2 | 0        | 0  | 2 |
| 0.91    | 1        | 2  | 2 | 1        | 1  | 1 |
| 0.76    | 3        | 3  | 0 | 2        | 2  | 0 |
| 0.46    | 3        | 13 | 0 | 2        | 7  | 0 |
| 0.00    | 3        | 22 | 0 | 2        | 19 | 0 |

## Proxies selected by the Multiple Sources method

Model 1

- (JHU) cases
- (GT) covid
- (GT) covid-19
- (GT) loss taste
- (GT) chest pain
- (GT) covid symptoms

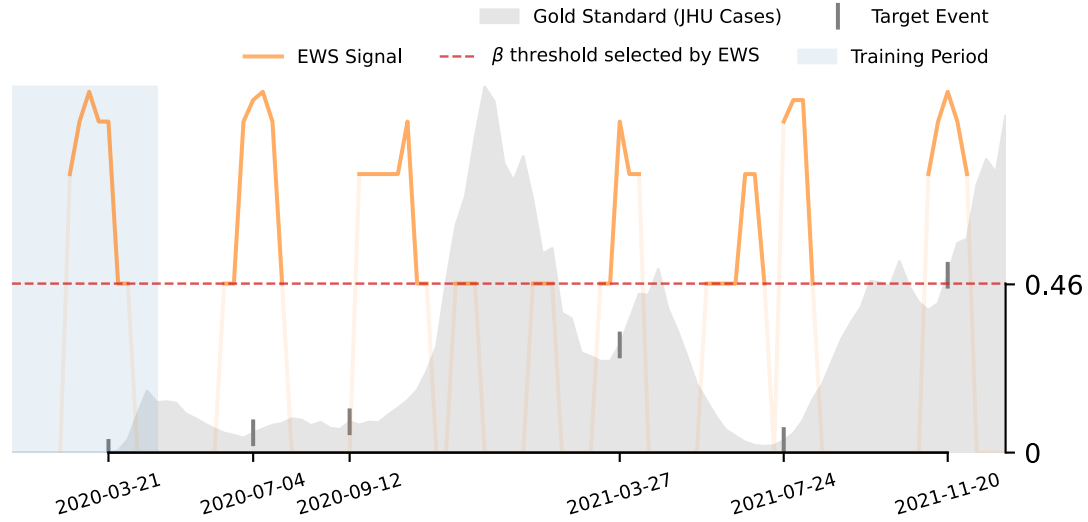

## Performance as a function of $\beta$

| $\beta$ | Training |    |    | Out of sample |    |    |
|---------|----------|----|----|---------------|----|----|
|         | tp       | fp | fn | tp            | fp | fn |
| 1.00    | 0        | 0  | 1  | 0             | 0  | 5  |
| 0.99    | 0        | 0  | 1  | 1             | 1  | 3  |
| 0.96    | 1        | 0  | 0  | 2             | 3  | 2  |
| 0.91    | 1        | 0  | 0  | 4             | 6  | 1  |
| 0.76    | 1        | 0  | 0  | 4             | 14 | 0  |
| 0.46    | 1        | 0  | 0  | 4             | 26 | 0  |
| 0.00    | 1        | 2  | 0  | 5             | 53 | 0  |

Model 2

- (GT) covid
- (GT) covid-19
- (GT) loss taste
- (GT) chest pain
- (GT) covid symptoms
- (GT) covid-19 who

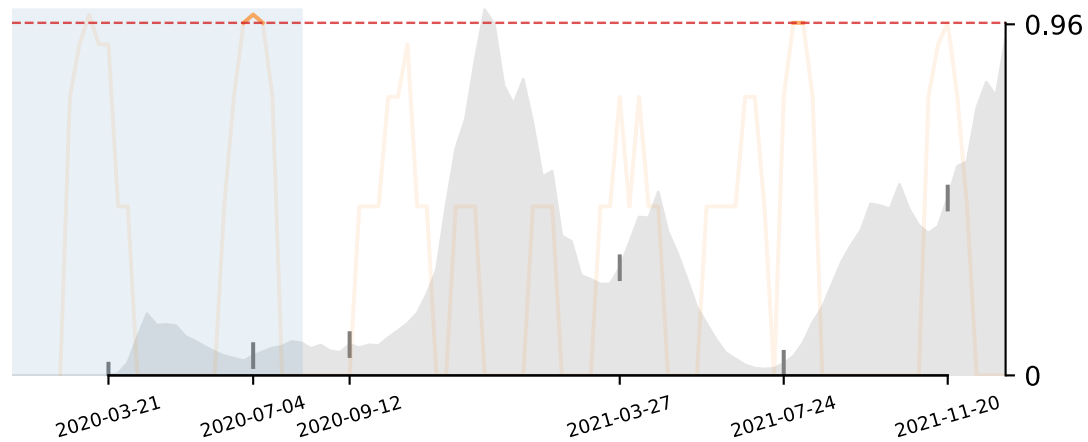

| $\beta$ | tp fp fn |   |   | tp fp fn |    |   |
|---------|----------|---|---|----------|----|---|
|         | 1.00     | 0 | 0 | 2        | 0  | 0 |
| 0.99    | 0        | 0 | 2 | 0        | 0  | 4 |
| 0.96    | 2        | 0 | 0 | 1        | 2  | 2 |
| 0.91    | 2        | 1 | 0 | 1        | 3  | 2 |
| 0.76    | 2        | 1 | 0 | 3        | 8  | 1 |
| 0.46    | 2        | 2 | 0 | 3        | 25 | 0 |
| 0.00    | 2        | 4 | 0 | 4        | 47 | 0 |

Model 3

- (GT) Anosmia
- (GT) Pneumonia
- (GT) Viral pneumonia
- (GT) Asthma
- (GT) Chest pain
- (GT) Wheeze

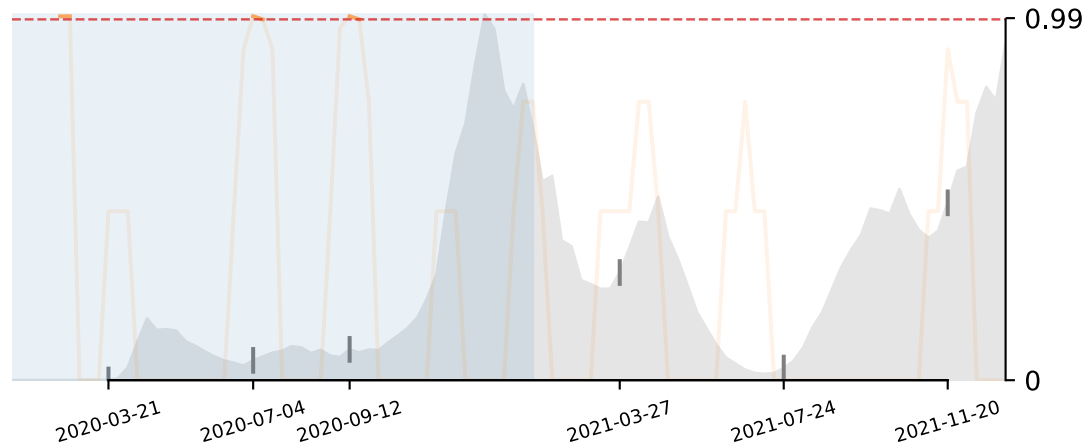

| $\beta$ | tp fp fn |    |   | tp fp fn |    |   |
|---------|----------|----|---|----------|----|---|
|         | 1.00     | 0  | 0 | 3        | 0  | 0 |
| 0.99    | 3        | 1  | 0 | 0        | 0  | 3 |
| 0.96    | 3        | 3  | 0 | 0        | 0  | 3 |
| 0.91    | 3        | 3  | 0 | 1        | 0  | 2 |
| 0.76    | 3        | 4  | 0 | 2        | 4  | 0 |
| 0.46    | 3        | 7  | 0 | 3        | 7  | 0 |
| 0.00    | 3        | 13 | 0 | 3        | 28 | 0 |



## Proxies selected by the Multiple Sources method

Model 1

- (JHU) cases
- (GT) covid
- (GT) covid-19
- (GT) chest pain
- (GT) covid symptoms
- (GT) quarantine

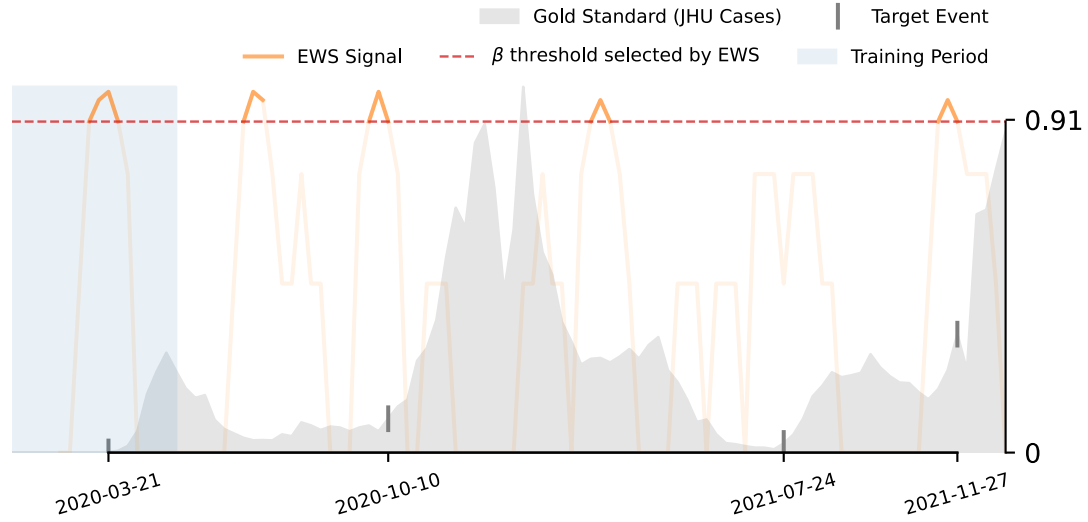

Model 2

- (GT) Acute bronchitis
- (JHU) cases
- (GT) covid
- (GT) covid-19
- (GT) covid symptoms
- (GT) quarantine

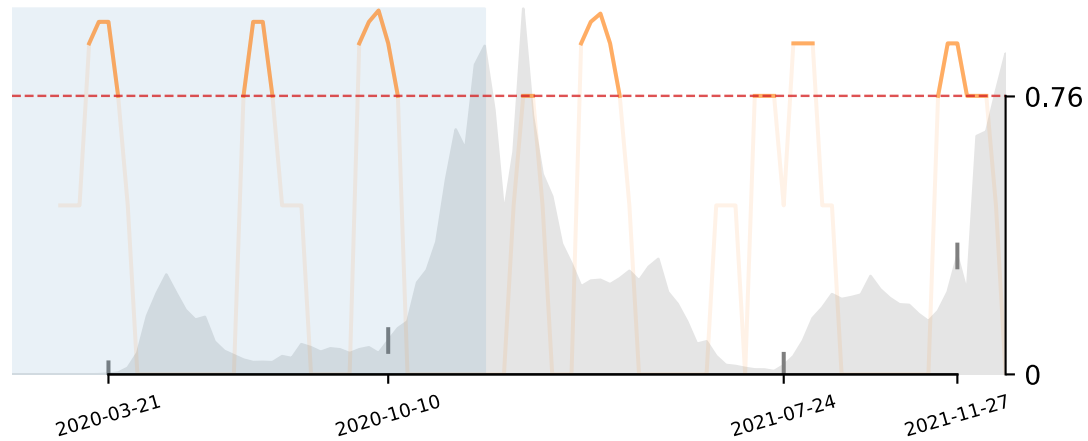

Model 3

- (GT) Throat irritation
- (JHU) cases
- (GT) covid
- (GT) Asthma
- (GT) Sore throat
- (GT) covid symptoms

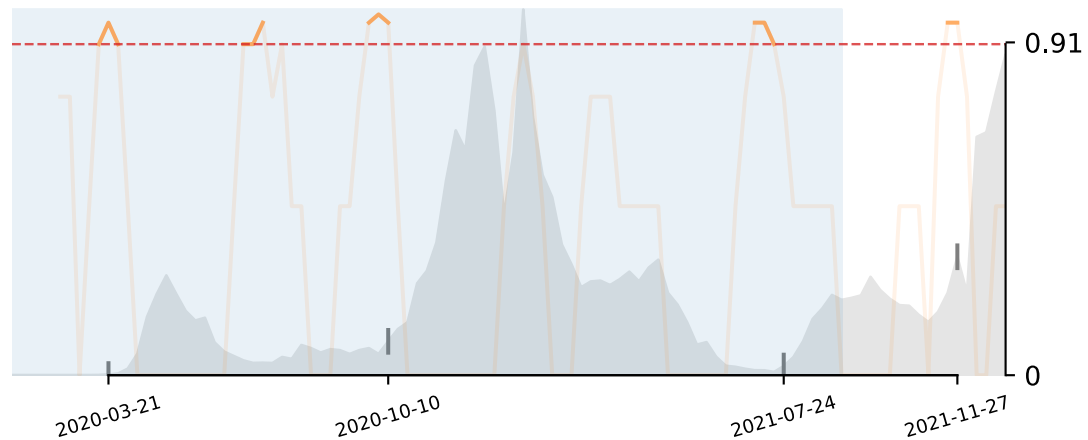

## Performance as a function of $\beta$

| $\beta$ | Training |    |    | Out of sample |    |    |
|---------|----------|----|----|---------------|----|----|
|         | tp       | fp | fn | tp            | fp | fn |
| 1.00    | 0        | 0  | 1  | 0             | 0  | 3  |
| 0.99    | 0        | 0  | 1  | 1             | 1  | 2  |
| 0.96    | 1        | 0  | 0  | 2             | 3  | 1  |
| 0.91    | 1        | 0  | 0  | 2             | 6  | 1  |
| 0.76    | 1        | 1  | 0  | 3             | 18 | 0  |
| 0.46    | 1        | 2  | 0  | 3             | 38 | 0  |
| 0.00    | 1        | 2  | 0  | 3             | 65 | 0  |

| $\beta$ | tp fp fn |    |   | tp fp fn |    |   |
|---------|----------|----|---|----------|----|---|
|         | 1.00     | 0  | 0 | 2        | 0  | 0 |
| 0.99    | 1        | 0  | 1 | 0        | 1  | 2 |
| 0.96    | 1        | 0  | 1 | 0        | 2  | 2 |
| 0.91    | 2        | 2  | 0 | 1        | 7  | 0 |
| 0.76    | 2        | 2  | 0 | 2        | 13 | 0 |
| 0.46    | 2        | 6  | 0 | 2        | 20 | 0 |
| 0.00    | 2        | 11 | 0 | 2        | 40 | 0 |

| $\beta$ | tp fp fn |    |   | tp fp fn |    |   |
|---------|----------|----|---|----------|----|---|
|         | 1.00     | 0  | 0 | 3        | 0  | 0 |
| 0.99    | 0        | 0  | 3 | 0        | 0  | 1 |
| 0.96    | 1        | 0  | 2 | 1        | 0  | 0 |
| 0.91    | 3        | 1  | 0 | 1        | 0  | 0 |
| 0.76    | 3        | 6  | 0 | 1        | 1  | 0 |
| 0.46    | 3        | 13 | 0 | 1        | 3  | 0 |
| 0.00    | 3        | 33 | 0 | 1        | 10 | 0 |

## Proxies selected by the Multiple Sources method

Model 1

- (JHU) cases
- (GT) covid
- (GT) covid-19
- (GT) chest pain
- (GT) covid symptoms
- (GT) quarantine

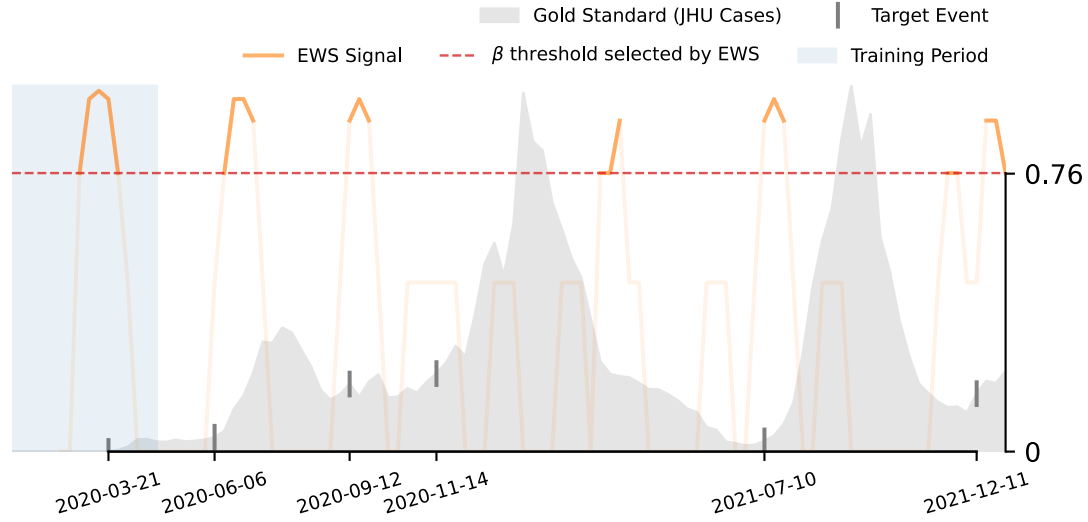

Model 2

- (GT) chest pain
- (GT) Ageusia
- (GT) Anosmia
- (GT) Chest pain
- (GT) Otitis

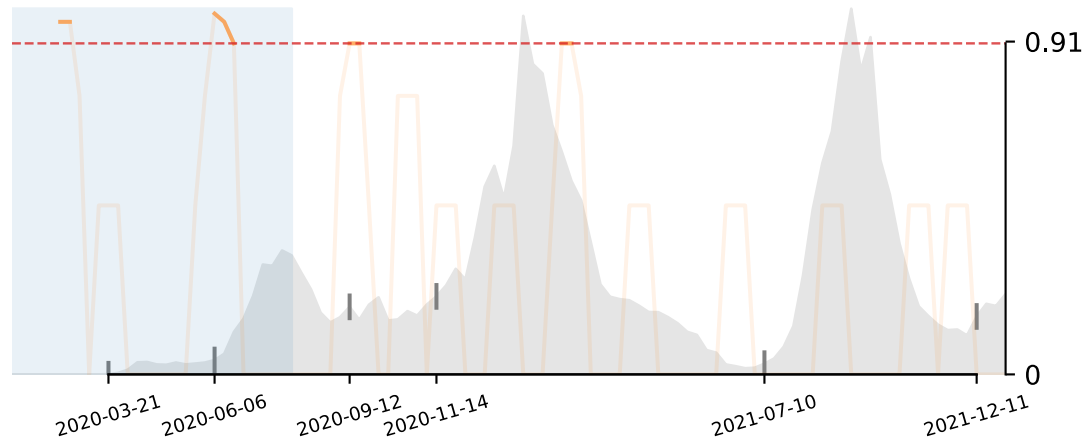

Model 3

- (GT) chest pain
- (GT) Anosmia
- (GT) Chest pain
- (JHU) cases
- (GT) Ageusia
- (GT) Otitis

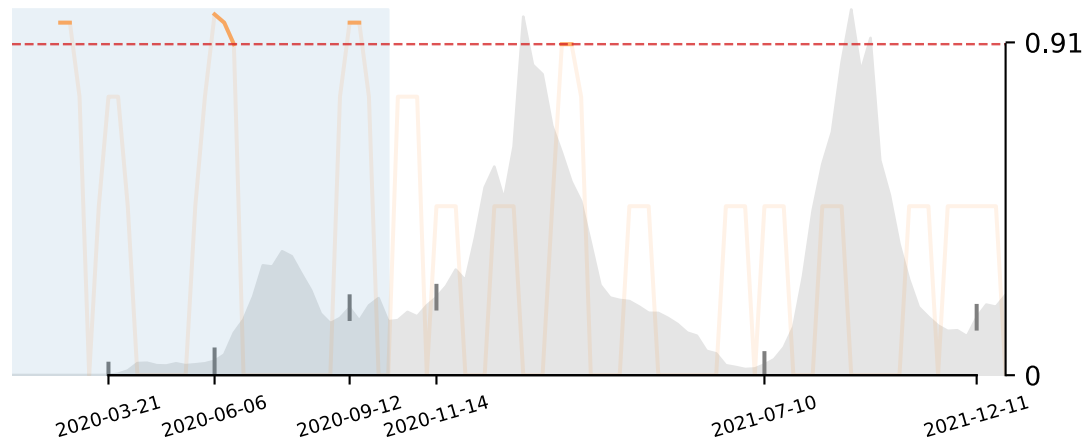

## Performance as a function of $\beta$

| $\beta$ | Training |    |    | Out of sample |    |    |
|---------|----------|----|----|---------------|----|----|
|         | tp       | fp | fn | tp            | fp | fn |
| 1.00    | 0        | 0  | 1  | 0             | 0  | 5  |
| 0.99    | 0        | 0  | 1  | 0             | 0  | 5  |
| 0.96    | 1        | 0  | 0  | 0             | 4  | 2  |
| 0.91    | 1        | 0  | 0  | 2             | 10 | 1  |
| 0.76    | 1        | 0  | 0  | 3             | 14 | 1  |
| 0.46    | 1        | 1  | 0  | 5             | 29 | 0  |
| 0.00    | 1        | 2  | 0  | 5             | 54 | 0  |

| $\beta$ | tp fp fn |   |   | tp fp fn |    |   |
|---------|----------|---|---|----------|----|---|
|         | 0.99     | 0 | 0 | 2        | 0  | 0 |
| 0.96    | 1        | 0 | 1 | 0        | 0  | 4 |
| 0.91    | 2        | 2 | 0 | 1        | 3  | 3 |
| 0.76    | 2        | 3 | 0 | 2        | 4  | 2 |
| 0.46    | 2        | 3 | 0 | 4        | 18 | 0 |
| 0.00    | 2        | 4 | 0 | 4        | 47 | 0 |

| $\beta$ | tp fp fn |   |   | tp fp fn |    |   |
|---------|----------|---|---|----------|----|---|
|         | 1.00     | 0 | 0 | 3        | 0  | 0 |
| 0.99    | 0        | 0 | 3 | 0        | 0  | 3 |
| 0.96    | 1        | 0 | 2 | 0        | 0  | 3 |
| 0.91    | 3        | 3 | 0 | 0        | 2  | 3 |
| 0.76    | 3        | 4 | 0 | 1        | 3  | 2 |
| 0.46    | 3        | 6 | 0 | 3        | 20 | 0 |
| 0.00    | 3        | 7 | 0 | 3        | 45 | 0 |

## Proxies selected by the Multiple Sources method

Model 1

- (GT) covid
- (GT) covid symptoms
- (GT) quarantine
- (GT) Acute bronchitis
- (GT) Asthma
- (GT) Bronchitis

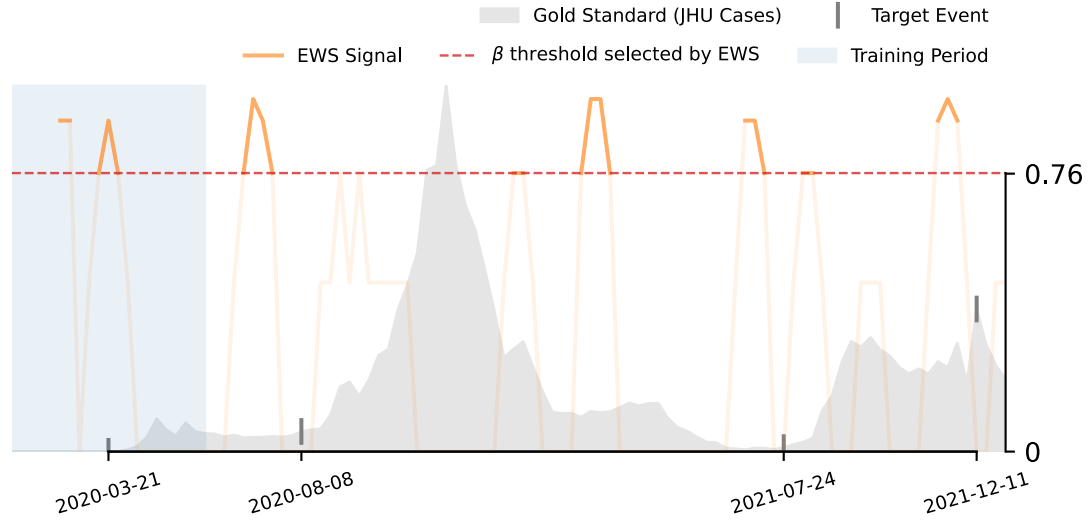

Model 2

- (GT) covid
- (GT) covid symptoms
- (GT) Bronchitis
- (GT) Cardiac arrest
- (GT) Wheeze
- Twitter (state level signal)

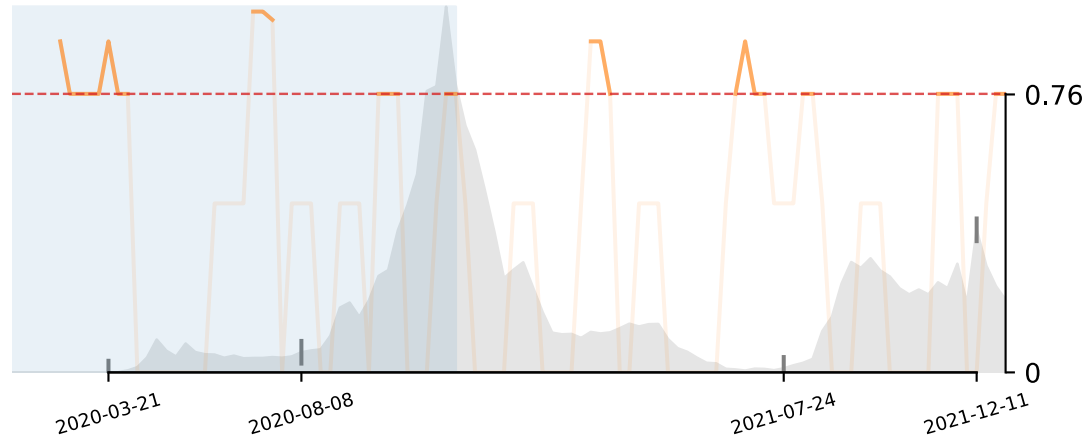

Model 3

- (GT) Bronchitis
- (GT) covid
- (GT) Cardiac arrest
- Twitter (state level signal)
- (GT) covid symptoms
- (GT) covid-19

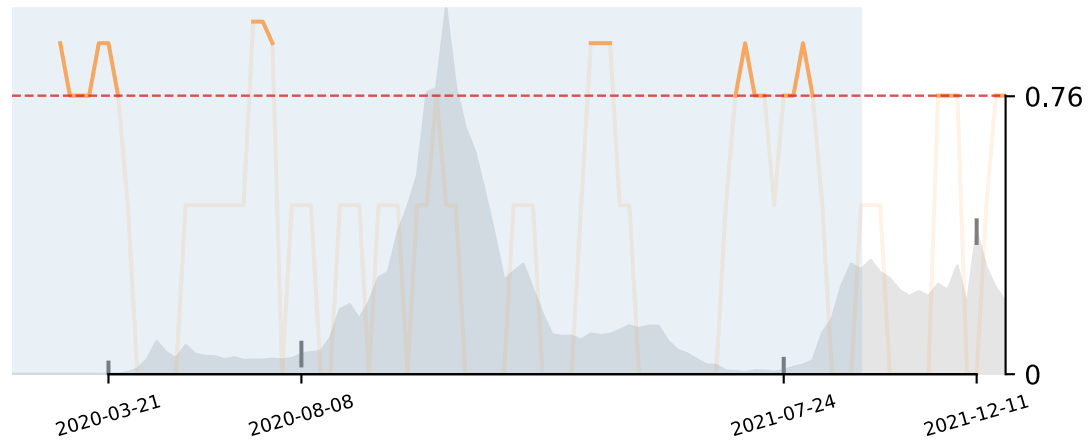

## Performance as a function of $\beta$

| $\beta$ | Training |    |    | Out of sample |    |    |
|---------|----------|----|----|---------------|----|----|
|         | tp       | fp | fn | tp            | fp | fn |
| 1.00    | 0        | 0  | 1  | 0             | 0  | 3  |
| 0.99    | 0        | 0  | 1  | 0             | 0  | 3  |
| 0.96    | 0        | 0  | 1  | 2             | 2  | 1  |
| 0.91    | 0        | 0  | 1  | 3             | 2  | 0  |
| 0.76    | 1        | 1  | 0  | 3             | 10 | 0  |
| 0.46    | 1        | 2  | 0  | 3             | 28 | 0  |
| 0.00    | 1        | 3  | 0  | 3             | 62 | 0  |

| $\beta$ | tp fp fn |    |   | tp fp fn |    |   |
|---------|----------|----|---|----------|----|---|
|         | 1.00     | 0  | 0 | 2        | 0  | 0 |
| 0.99    | 0        | 0  | 2 | 0        | 0  | 2 |
| 0.96    | 1        | 1  | 1 | 0        | 0  | 2 |
| 0.91    | 1        | 1  | 1 | 1        | 2  | 1 |
| 0.76    | 2        | 2  | 0 | 2        | 7  | 0 |
| 0.46    | 2        | 9  | 0 | 2        | 21 | 0 |
| 0.00    | 2        | 18 | 0 | 2        | 43 | 0 |

| $\beta$ | tp fp fn |    |   | tp fp fn |   |   |
|---------|----------|----|---|----------|---|---|
|         | 1.00     | 0  | 0 | 3        | 0 | 0 |
| 0.99    | 0        | 0  | 3 | 0        | 0 | 1 |
| 0.96    | 0        | 0  | 3 | 0        | 0 | 1 |
| 0.91    | 1        | 1  | 2 | 0        | 0 | 1 |
| 0.76    | 3        | 6  | 0 | 1        | 2 | 0 |
| 0.46    | 3        | 11 | 0 | 1        | 5 | 0 |
| 0.00    | 3        | 39 | 0 | 1        | 8 | 0 |

## Proxies selected by the Multiple Sources method

Model 1

- (JHU) cases
- (GT) covid
- (GT) how long does covid last
- (GT) covid-19
- (GT) chest tightness
- (GT) covid-19 who

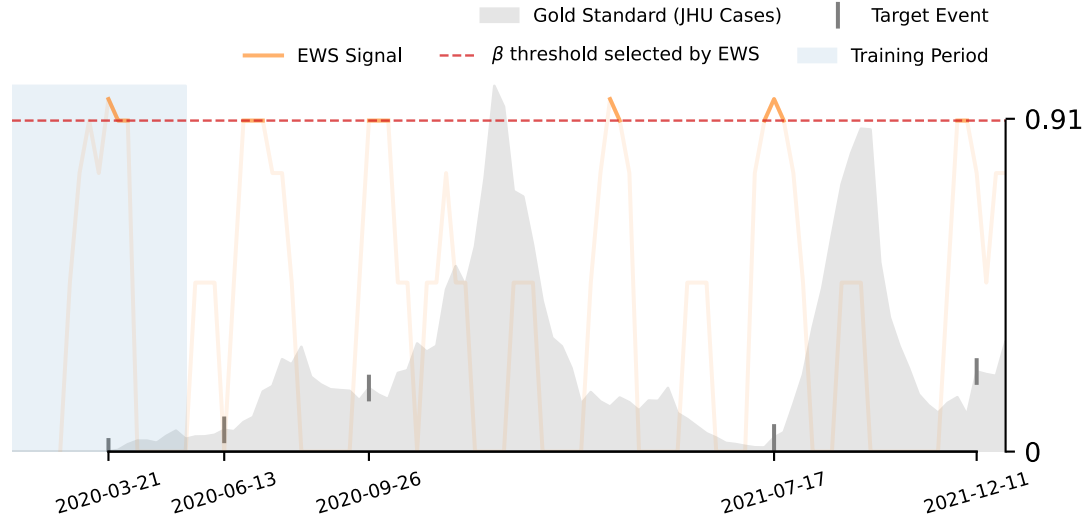

Model 2

- (GT) covid symptoms
- (GT) fever
- (GT) Ageusia
- (GT) Anosmia
- (GT) Chest pain
- (GT) Diarrhea

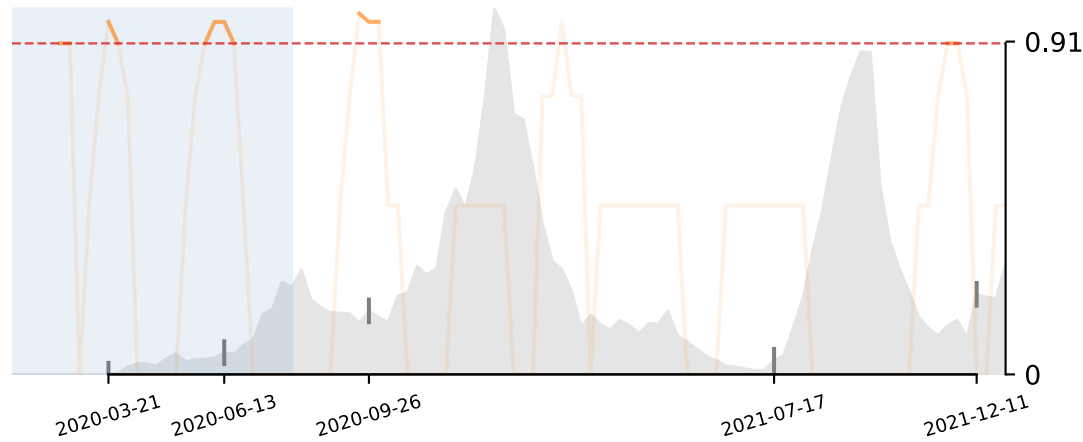

Model 3

- (GT) Ageusia
- (GT) Anosmia
- (GT) Chest pain
- (GT) fever
- (GT) Diarrhea
- (GT) Shortness of breath

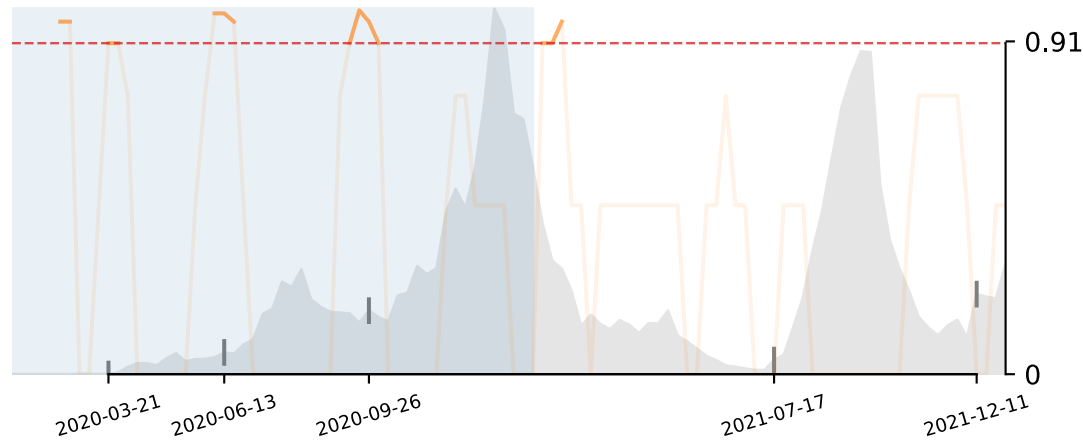

## Performance as a function of $\beta$

| $\beta$ | Training |    |    | Out of sample |    |    |
|---------|----------|----|----|---------------|----|----|
|         | tp       | fp | fn | tp            | fp | fn |
| 1.00    | 0        | 0  | 1  | 0             | 0  | 4  |
| 0.99    | 0        | 0  | 1  | 0             | 0  | 4  |
| 0.96    | 0        | 0  | 1  | 1             | 1  | 3  |
| 0.91    | 1        | 0  | 0  | 3             | 8  | 0  |
| 0.76    | 1        | 2  | 0  | 3             | 16 | 0  |
| 0.46    | 1        | 2  | 0  | 4             | 36 | 0  |
| 0.00    | 1        | 2  | 0  | 4             | 60 | 0  |

| $\beta$ | tp fp fn |   |   | tp fp fn |    |   |
|---------|----------|---|---|----------|----|---|
|         | 1.00     | 0 | 0 | 2        | 0  | 0 |
| 0.99    | 0        | 0 | 2 | 1        | 0  | 2 |
| 0.96    | 0        | 0 | 2 | 1        | 2  | 2 |
| 0.91    | 2        | 0 | 0 | 2        | 2  | 1 |
| 0.76    | 2        | 3 | 0 | 2        | 6  | 1 |
| 0.46    | 2        | 4 | 0 | 3        | 28 | 0 |
| 0.00    | 2        | 5 | 0 | 3        | 53 | 0 |

| $\beta$ | tp fp fn |    |   | tp fp fn |    |   |
|---------|----------|----|---|----------|----|---|
|         | 1.00     | 0  | 0 | 3        | 0  | 0 |
| 0.99    | 1        | 0  | 2 | 0        | 0  | 2 |
| 0.96    | 2        | 0  | 1 | 0        | 1  | 2 |
| 0.91    | 3        | 2  | 0 | 0        | 3  | 2 |
| 0.76    | 3        | 4  | 0 | 2        | 3  | 0 |
| 0.46    | 3        | 7  | 0 | 2        | 21 | 0 |
| 0.00    | 3        | 13 | 0 | 2        | 35 | 0 |

## Proxies selected by the Multiple Sources method

Model 1

- (GT) side effects of vaccine
- (GT) covid
- (GT) how long does covid last
- (GT) covid-19
- (GT) loss taste
- (GT) chest pain

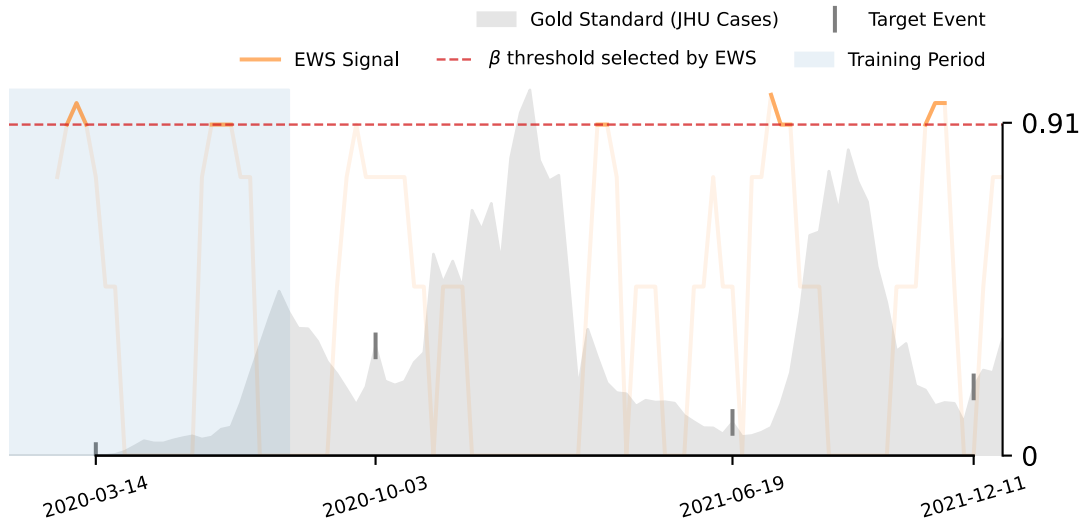

Model 2

- (GT) covid
- (GT) loss taste
- (GT) chest pain
- (GT) covid symptoms
- (GT) fever
- (GT) Acute bronchitis

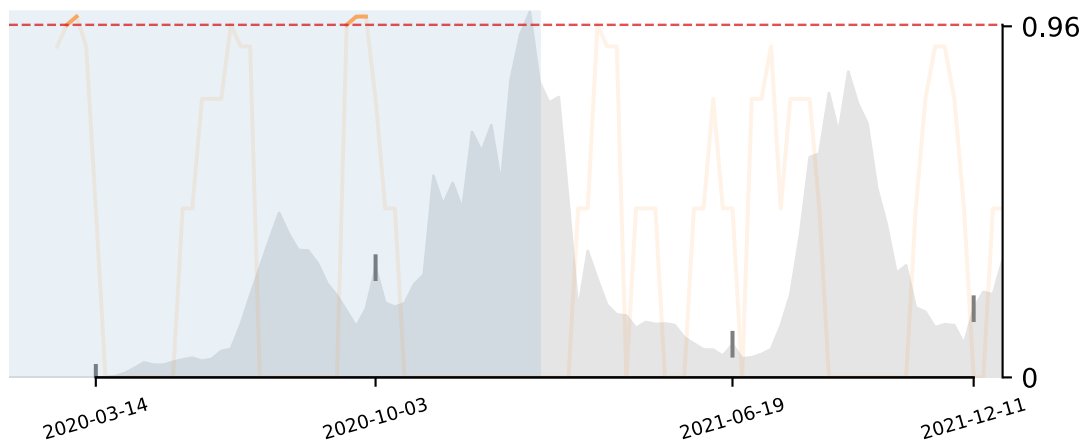

Model 3

- (GT) loss taste
- (GT) Fever
- (GT) Shortness of breath
- (GT) Vomiting
- (GT) chest pain
- (GT) Sore throat

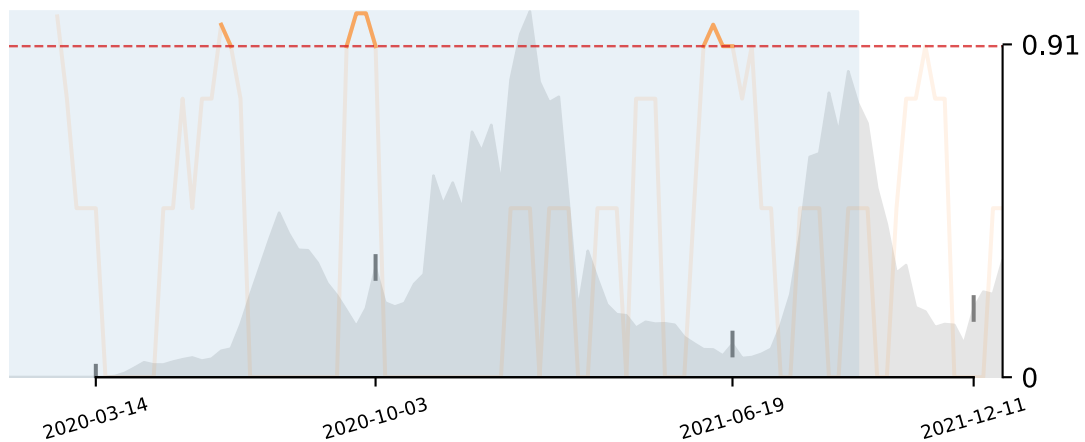

## Performance as a function of $\beta$

| $\beta$ | Training |    |    | Out of sample |    |    |
|---------|----------|----|----|---------------|----|----|
|         | tp       | fp | fn | tp            | fp | fn |
| 1.00    | 0        | 0  | 1  | 0             | 0  | 3  |
| 0.99    | 0        | 0  | 1  | 0             | 1  | 3  |
| 0.96    | 0        | 0  | 1  | 1             | 1  | 2  |
| 0.91    | 1        | 0  | 0  | 2             | 5  | 1  |
| 0.76    | 1        | 3  | 0  | 3             | 13 | 0  |
| 0.46    | 1        | 6  | 0  | 3             | 28 | 0  |
| 0.00    | 1        | 8  | 0  | 3             | 53 | 0  |

| $\beta$ | tp fp fn |    |   | tp fp fn |    |   |
|---------|----------|----|---|----------|----|---|
|         | 1.00     | 0  | 0 | 2        | 0  | 0 |
| 0.99    | 0        | 0  | 2 | 0        | 0  | 2 |
| 0.96    | 2        | 0  | 0 | 0        | 1  | 2 |
| 0.91    | 2        | 1  | 0 | 1        | 4  | 1 |
| 0.76    | 2        | 3  | 0 | 2        | 9  | 0 |
| 0.46    | 2        | 6  | 0 | 2        | 18 | 0 |
| 0.00    | 2        | 10 | 0 | 2        | 34 | 0 |

| $\beta$ | tp fp fn |    |   | tp fp fn |   |   |
|---------|----------|----|---|----------|---|---|
|         | 1.00     | 0  | 0 | 3        | 0 | 0 |
| 0.99    | 1        | 0  | 2 | 0        | 0 | 1 |
| 0.96    | 2        | 0  | 1 | 0        | 0 | 1 |
| 0.91    | 3        | 1  | 0 | 1        | 0 | 0 |
| 0.76    | 3        | 3  | 0 | 1        | 1 | 0 |
| 0.46    | 3        | 11 | 0 | 1        | 5 | 0 |
| 0.00    | 3        | 30 | 0 | 1        | 8 | 0 |

## Proxies selected by the Multiple Sources method

### Model 1

- (JHU) cases
- (GT) covid
- (GT) covid-19
- (GT) chest pain
- (GT) covid-19 who
- (GT) Acute bronchitis

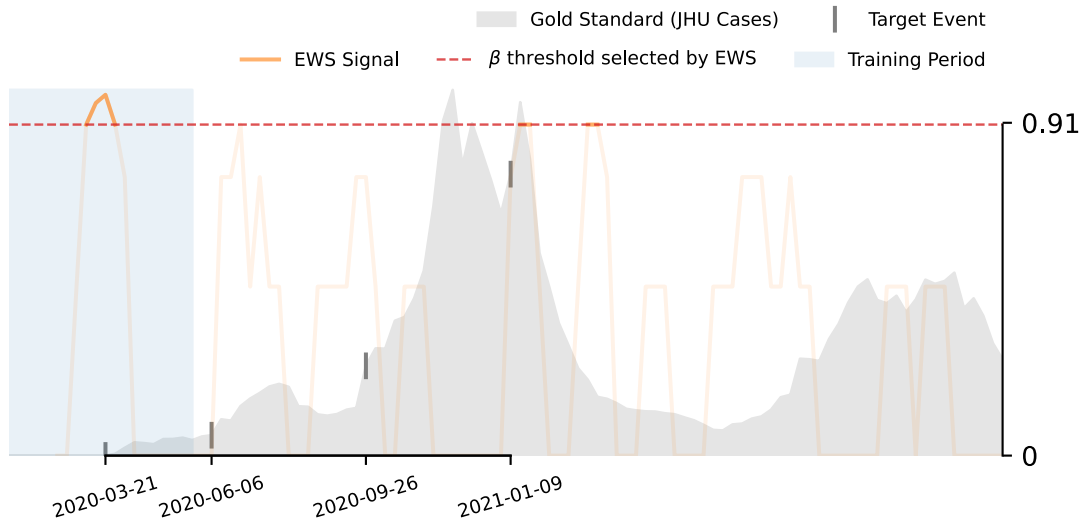

## Performance as a function of $\beta$

| $\beta$ | Training |    |    | Out of sample |    |    |
|---------|----------|----|----|---------------|----|----|
|         | tp       | fp | fn | tp            | fp | fn |
| 1.00    | 0        | 0  | 1  | 0             | 0  | 3  |
| 0.99    | 0        | 0  | 1  | 0             | 0  | 3  |
| 0.96    | 1        | 0  | 0  | 0             | 0  | 3  |
| 0.91    | 1        | 0  | 0  | 0             | 5  | 2  |
| 0.76    | 1        | 1  | 0  | 2             | 13 | 0  |
| 0.46    | 1        | 2  | 0  | 2             | 38 | 0  |
| 0.00    | 1        | 2  | 0  | 3             | 68 | 0  |

### Model 2

- (GT) covid symptoms
- (GT) fever
- (GT) Chest pain
- (GT) Throat irritation
- (GT) Chills

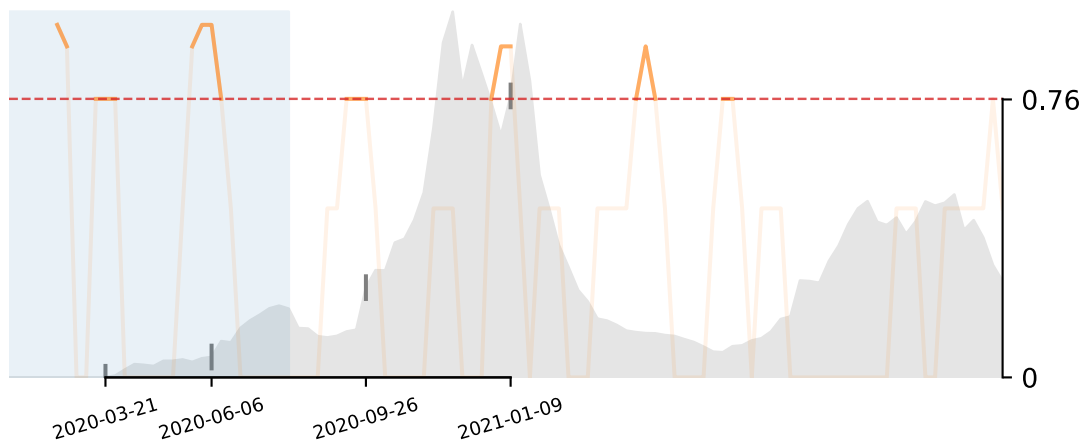

| $\beta$ | tp fp fn |   |   | tp fp fn |    |   |
|---------|----------|---|---|----------|----|---|
|         | 0.99     | 0 | 0 | 2        | 0  | 0 |
| 0.96    | 0        | 0 | 2 | 0        | 0  | 2 |
| 0.91    | 1        | 1 | 1 | 1        | 1  | 1 |
| 0.76    | 2        | 1 | 0 | 2        | 6  | 0 |
| 0.46    | 2        | 3 | 0 | 2        | 32 | 0 |
| 0.00    | 2        | 4 | 0 | 2        | 60 | 0 |

### Model 3

- (GT) fever
- (GT) Chest pain
- (GT) Chills
- (JHU) cases
- (GT) covid symptoms
- (GT) Ageusia

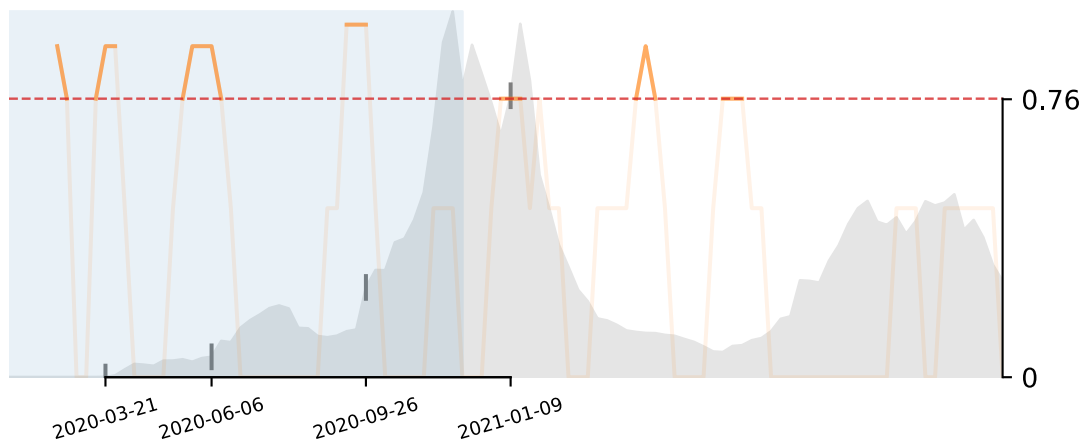

| $\beta$ | tp fp fn |   |   | tp fp fn |    |   |
|---------|----------|---|---|----------|----|---|
|         | 1.00     | 0 | 0 | 3        | 0  | 0 |
| 0.99    | 0        | 0 | 3 | 0        | 0  | 1 |
| 0.96    | 0        | 0 | 3 | 0        | 0  | 1 |
| 0.91    | 1        | 0 | 2 | 0        | 1  | 1 |
| 0.76    | 3        | 2 | 0 | 1        | 8  | 0 |
| 0.46    | 3        | 3 | 0 | 1        | 28 | 0 |
| 0.00    | 3        | 9 | 0 | 1        | 51 | 0 |

## Proxies selected by the Multiple Sources method

Model 1

- (GT) covid
- (GT) covid-19
- (GT) chest pain
- (GT) covid symptoms
- (GT) quarantine
- (GT) fever

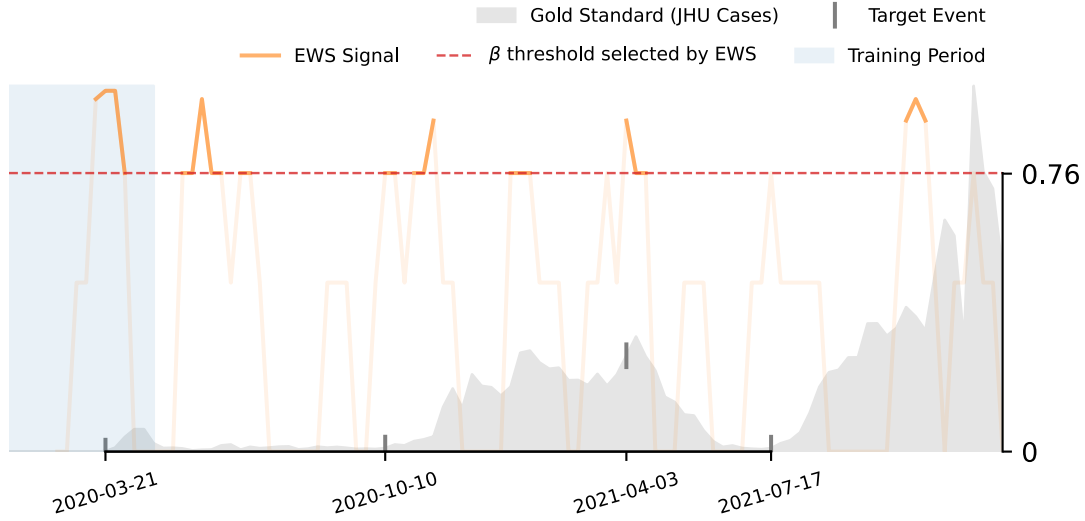

Model 2

- (GT) covid-19
- (GT) fever
- Twitter (state level signal)
- (GT) covid

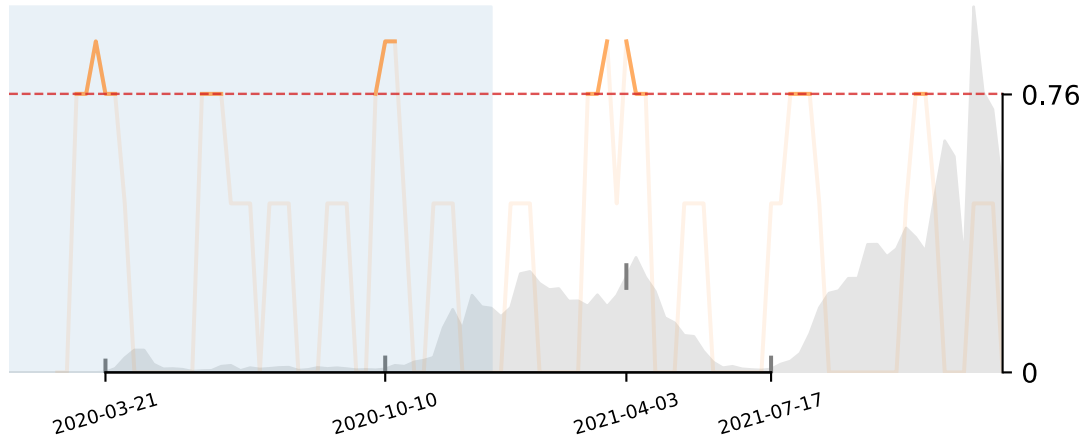

Model 3

- (GT) covid-19
- Twitter (state level signal)
- (GT) covid
- (GT) fever
- (GT) Acute bronchitis
- (JHU) cases

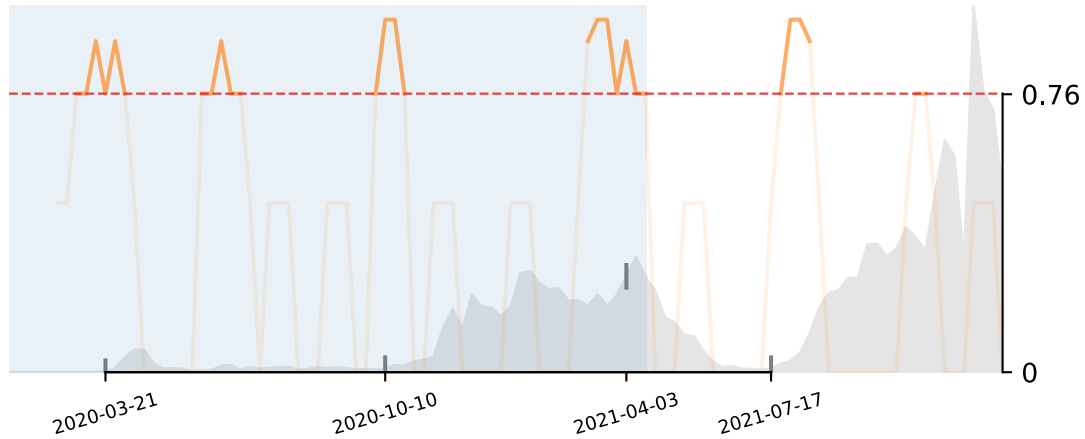

## Performance as a function of $\beta$

| $\beta$ | Training |    |    | Out of sample |    |    |
|---------|----------|----|----|---------------|----|----|
|         | tp       | fp | fn | tp            | fp | fn |
| 1.00    | 0        | 0  | 1  | 0             | 0  | 3  |
| 0.99    | 0        | 0  | 1  | 0             | 0  | 3  |
| 0.96    | 1        | 1  | 0  | 0             | 2  | 3  |
| 0.91    | 1        | 1  | 0  | 1             | 5  | 2  |
| 0.76    | 1        | 1  | 0  | 3             | 20 | 0  |
| 0.46    | 1        | 2  | 0  | 3             | 42 | 0  |
| 0.00    | 1        | 2  | 0  | 3             | 67 | 0  |

| $\beta$ | tp | fp | fn | tp | fp | fn |
|---------|----|----|----|----|----|----|
| 0.96    | 0  | 0  | 2  | 0  | 0  | 2  |
| 0.91    | 0  | 0  | 2  | 1  | 0  | 1  |
| 0.76    | 2  | 1  | 0  | 1  | 7  | 0  |
| 0.46    | 2  | 5  | 0  | 2  | 20 | 0  |
| 0.00    | 2  | 18 | 0  | 2  | 39 | 0  |

| $\beta$ | tp | fp | fn | tp | fp | fn |
|---------|----|----|----|----|----|----|
| 1.00    | 0  | 0  | 3  | 0  | 0  | 1  |
| 0.99    | 0  | 0  | 3  | 0  | 0  | 1  |
| 0.96    | 0  | 0  | 3  | 0  | 2  | 0  |
| 0.91    | 2  | 1  | 1  | 0  | 3  | 0  |
| 0.76    | 3  | 3  | 0  | 0  | 6  | 0  |
| 0.46    | 3  | 11 | 0  | 1  | 15 | 0  |
| 0.00    | 3  | 26 | 0  | 1  | 30 | 0  |

## Proxies selected by the Multiple Sources method

Model 1

- (GT) covid
- (GT) how long does covid last
- (GT) covid-19
- (GT) chest pain
- (GT) nose bleed
- (GT) Acute bronchitis

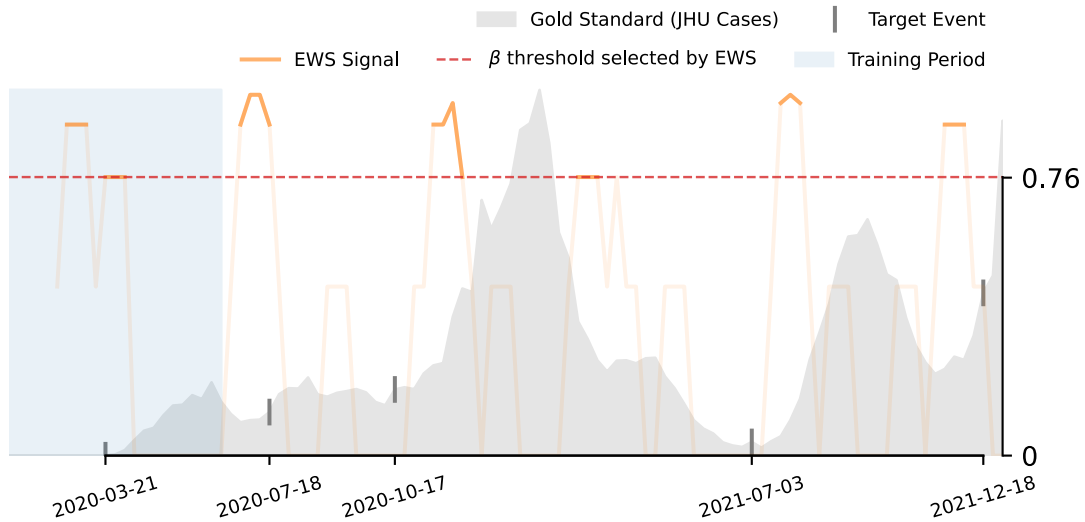

Model 2

- (GT) covid
- (GT) how long does covid last
- (GT) covid-19
- (GT) chest pain
- (GT) nose bleed
- (GT) Acute bronchitis

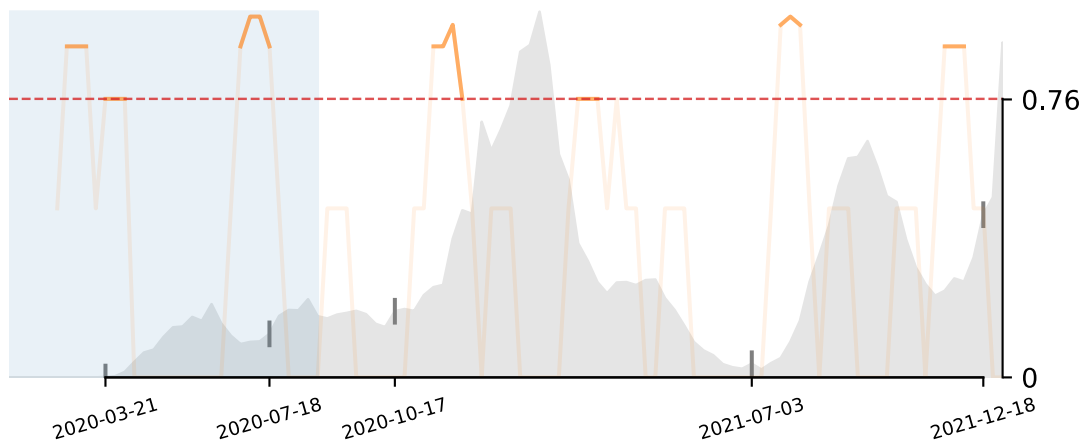

Model 3

- (GT) Anosmia
- (GT) Asthma
- (GT) Bronchitis
- (GT) Cough
- (GT) Throat irritation
- (GT) Chest pain

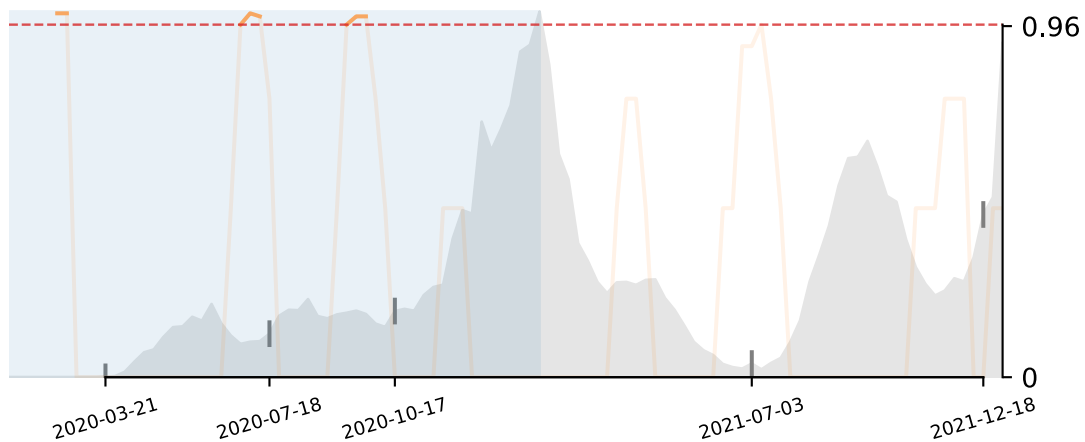

## Performance as a function of $\beta$

| $\beta$ | Training |    |    | Out of sample |    |    |
|---------|----------|----|----|---------------|----|----|
|         | tp       | fp | fn | tp            | fp | fn |
| 1.00    | 0        | 0  | 1  | 0             | 0  | 4  |
| 0.99    | 0        | 0  | 1  | 1             | 1  | 3  |
| 0.96    | 0        | 0  | 1  | 1             | 4  | 3  |
| 0.91    | 0        | 0  | 1  | 2             | 6  | 2  |
| 0.76    | 1        | 0  | 0  | 2             | 11 | 2  |
| 0.46    | 1        | 2  | 0  | 3             | 34 | 0  |
| 0.00    | 1        | 3  | 0  | 4             | 55 | 0  |

| $\beta$ | tp fp fn |   |   | tp fp fn |    |   |
|---------|----------|---|---|----------|----|---|
|         | 1.00     | 0 | 0 | 2        | 0  | 0 |
| 0.99    | 0        | 0 | 2 | 0        | 1  | 3 |
| 0.96    | 1        | 0 | 1 | 0        | 4  | 3 |
| 0.91    | 1        | 0 | 1 | 1        | 6  | 2 |
| 0.76    | 2        | 0 | 0 | 1        | 11 | 2 |
| 0.46    | 2        | 2 | 0 | 2        | 33 | 0 |
| 0.00    | 2        | 4 | 0 | 3        | 50 | 0 |

| $\beta$ | tp fp fn |   |   | tp fp fn |    |   |
|---------|----------|---|---|----------|----|---|
|         | 1.00     | 0 | 0 | 3        | 0  | 0 |
| 0.99    | 2        | 1 | 1 | 0        | 0  | 2 |
| 0.96    | 3        | 1 | 0 | 0        | 1  | 1 |
| 0.91    | 3        | 2 | 0 | 1        | 1  | 1 |
| 0.76    | 3        | 2 | 0 | 2        | 4  | 0 |
| 0.46    | 3        | 2 | 0 | 2        | 10 | 0 |
| 0.00    | 3        | 6 | 0 | 2        | 34 | 0 |



## Proxies selected by the Multiple Sources method

Model 1

- (JHU) cases
- (JHU) deaths
- (GT) covid
- (GT) how long does covid last
- (GT) covid-19
- (GT) chest pain

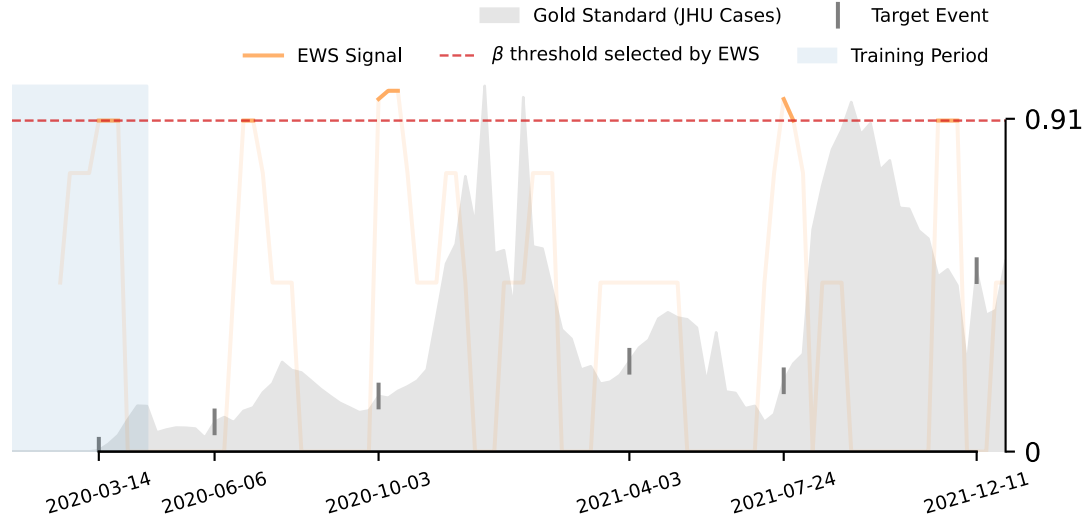

## Performance as a function of $\beta$

| $\beta$ | Training |    |    | Out of sample |    |    |
|---------|----------|----|----|---------------|----|----|
|         | tp       | fp | fn | tp            | fp | fn |
| 1.00    | 0        | 0  | 1  | 0             | 0  | 5  |
| 0.99    | 0        | 0  | 1  | 0             | 2  | 4  |
| 0.96    | 0        | 0  | 1  | 2             | 2  | 3  |
| 0.91    | 0        | 0  | 1  | 3             | 5  | 2  |
| 0.76    | 1        | 2  | 0  | 3             | 13 | 2  |
| 0.46    | 1        | 2  | 0  | 4             | 34 | 0  |
| 0.00    | 1        | 2  | 0  | 5             | 54 | 0  |

Model 2

- (GT) Anxiety
- (GT) Chest pain
- (GT) Diarrhea
- (GT) Vomiting
- (GT) Fever
- (GT) Otitis

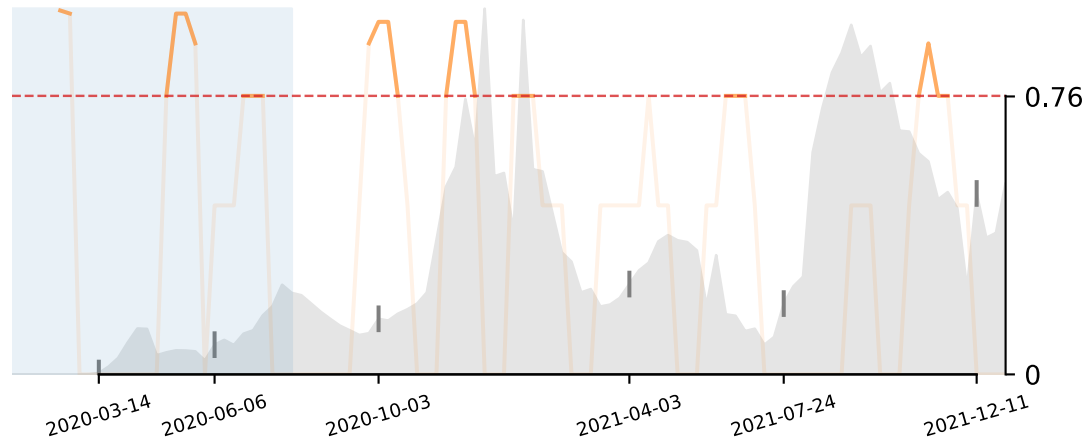

| $\beta$ | tp fp fn |   |   | tp fp fn |    |   |
|---------|----------|---|---|----------|----|---|
|         | 1.00     | 0 | 0 | 2        | 0  | 0 |
| 0.99    | 1        | 0 | 1 | 0        | 0  | 4 |
| 0.96    | 2        | 0 | 0 | 1        | 3  | 3 |
| 0.91    | 2        | 0 | 0 | 2        | 3  | 2 |
| 0.76    | 2        | 0 | 0 | 3        | 10 | 0 |
| 0.46    | 2        | 4 | 0 | 4        | 23 | 0 |
| 0.00    | 2        | 6 | 0 | 4        | 46 | 0 |

Model 3

- (GT) Chest pain
- (GT) Vomiting
- (GT) Fever
- (GT) Otitis
- (JHU) cases
- (GT) Anxiety

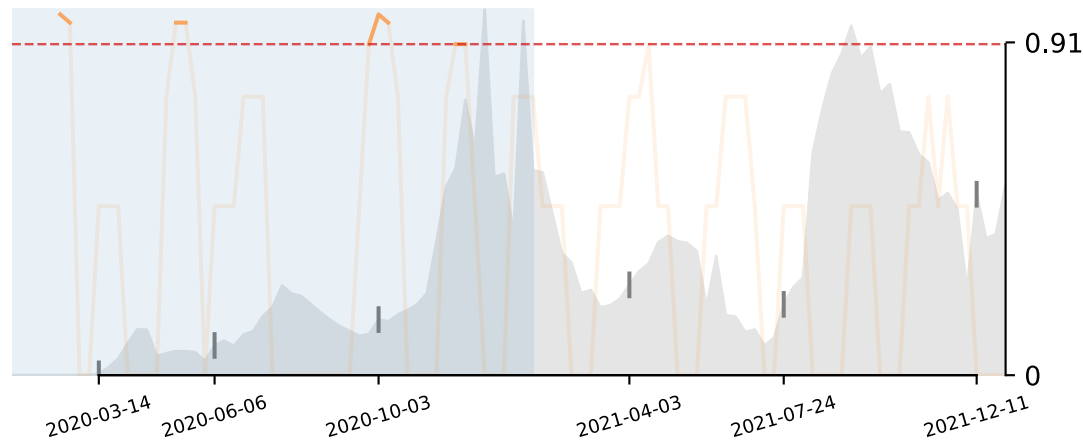

| $\beta$ | tp fp fn |    |   | tp fp fn |    |   |
|---------|----------|----|---|----------|----|---|
|         | 1.00     | 0  | 0 | 3        | 0  | 0 |
| 0.99    | 0        | 0  | 3 | 0        | 0  | 3 |
| 0.96    | 2        | 0  | 1 | 0        | 0  | 3 |
| 0.91    | 3        | 1  | 0 | 0        | 1  | 2 |
| 0.76    | 3        | 3  | 0 | 3        | 2  | 0 |
| 0.46    | 3        | 12 | 0 | 3        | 15 | 0 |
| 0.00    | 3        | 17 | 0 | 3        | 28 | 0 |

## Proxies selected by the Multiple Sources method

Model 1

- (GT) how long does covid last
- (GT) chest pain
- (GT) chest tightness
- (GT) covid-19 who
- (GT) covid
- (GT) covid-19

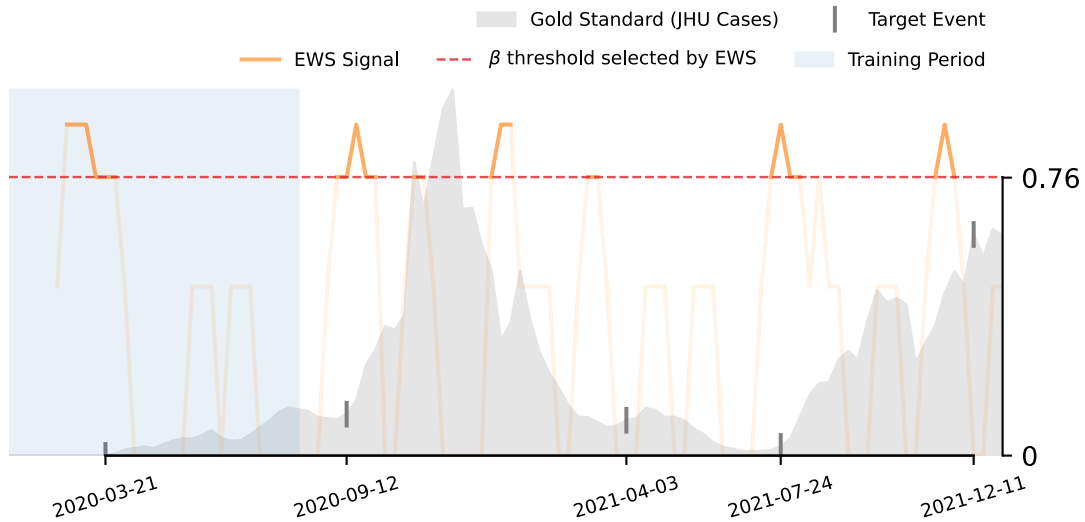

## Performance as a function of $\beta$

| $\beta$ | Training |    |    | Out of sample |    |    |
|---------|----------|----|----|---------------|----|----|
|         | tp       | fp | fn | tp            | fp | fn |
| 1.00    | 0        | 0  | 1  | 0             | 0  | 4  |
| 0.99    | 0        | 0  | 1  | 0             | 0  | 4  |
| 0.96    | 0        | 0  | 1  | 0             | 0  | 4  |
| 0.91    | 0        | 0  | 1  | 2             | 3  | 1  |
| 0.76    | 1        | 0  | 0  | 4             | 11 | 0  |
| 0.46    | 1        | 1  | 0  | 4             | 31 | 0  |
| 0.00    | 1        | 9  | 0  | 4             | 47 | 0  |

Model 2

- (GT) chest pain
- (GT) how long does covid last
- (GT) quarantine
- (GT) Ageusia
- (GT) Anosmia
- (GT) Bronchitis

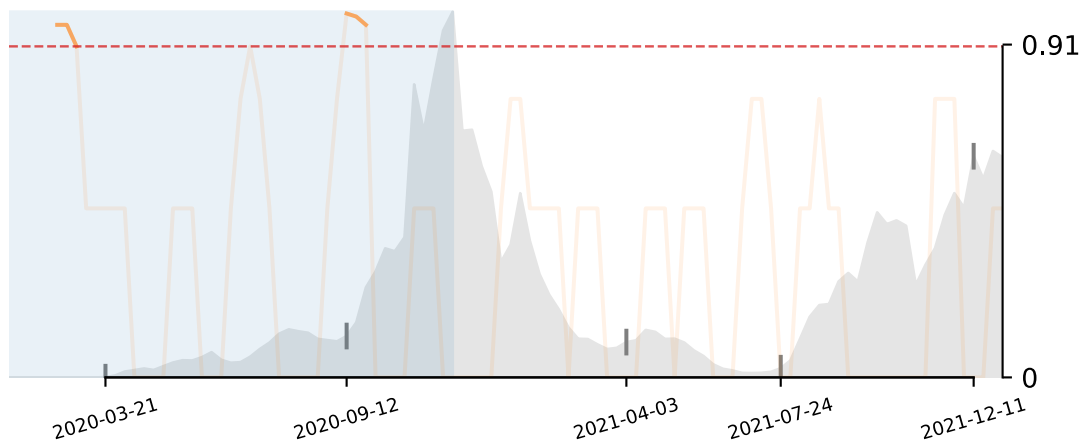

| $\beta$ | Training |    |    | Out of sample |    |    |
|---------|----------|----|----|---------------|----|----|
|         | tp       | fp | fn | tp            | fp | fn |
| 1.00    | 0        | 0  | 2  | 0             | 0  | 3  |
| 0.99    | 1        | 0  | 1  | 0             | 0  | 3  |
| 0.96    | 1        | 1  | 1  | 0             | 0  | 3  |
| 0.91    | 2        | 3  | 0  | 0             | 0  | 3  |
| 0.76    | 2        | 4  | 0  | 2             | 3  | 1  |
| 0.46    | 2        | 6  | 0  | 3             | 20 | 0  |
| 0.00    | 2        | 16 | 0  | 3             | 36 | 0  |

Model 3

- (GT) how long does covid last
- (GT) Hyperventilation
- (GT) Cough
- (GT) Nasal congestion
- (GT) side effects of vaccine
- (GT) Ageusia

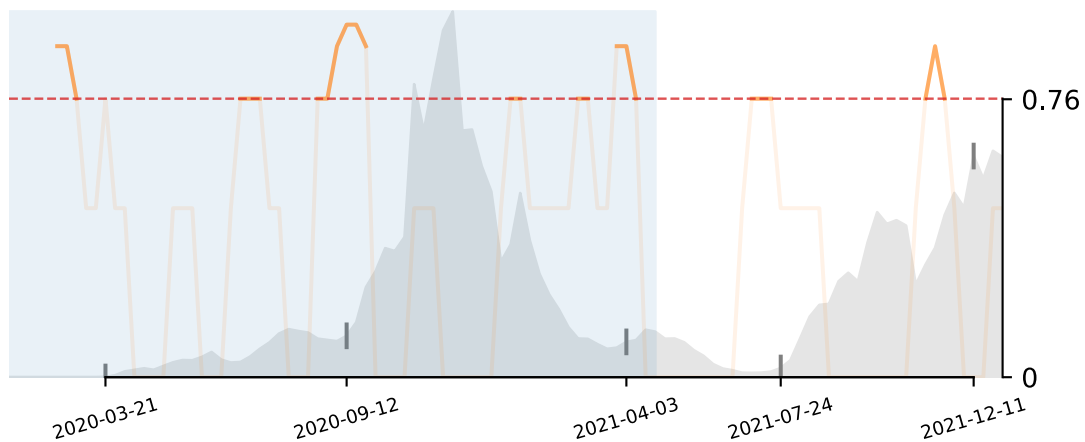

| $\beta$ | Training |    |    | Out of sample |    |    |
|---------|----------|----|----|---------------|----|----|
|         | tp       | fp | fn | tp            | fp | fn |
| 1.00    | 0        | 0  | 3  | 0             | 0  | 2  |
| 0.99    | 0        | 0  | 3  | 0             | 0  | 2  |
| 0.96    | 0        | 0  | 3  | 0             | 0  | 2  |
| 0.91    | 1        | 1  | 2  | 1             | 0  | 1  |
| 0.76    | 3        | 3  | 0  | 2             | 0  | 0  |
| 0.46    | 3        | 10 | 0  | 2             | 6  | 0  |
| 0.00    | 3        | 27 | 0  | 2             | 22 | 0  |

## Proxies selected by the Multiple Sources method

Model 1

- (JHU) cases
- (GT) covid
- (GT) covid-19
- (GT) covid symptoms
- (GT) quarantine
- (GT) fever

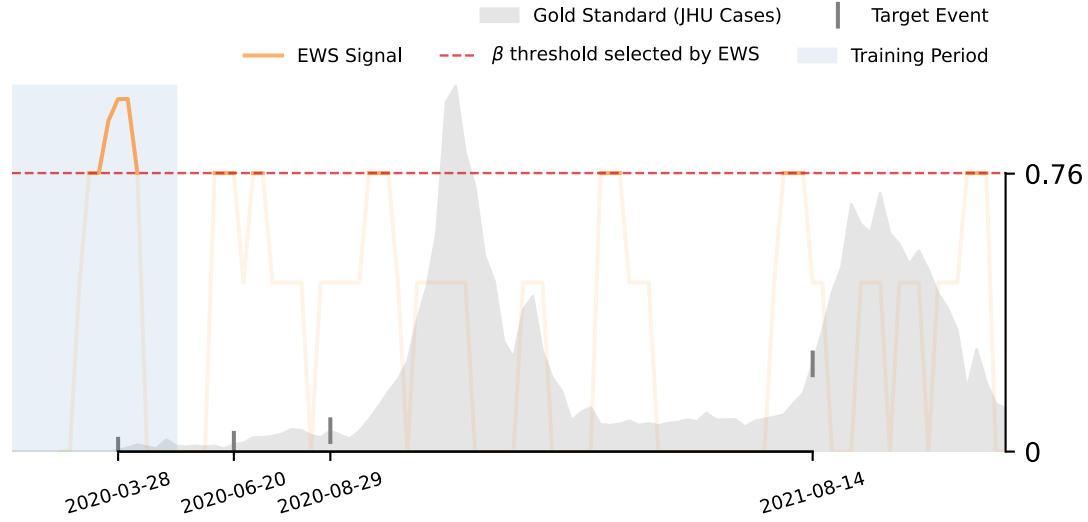

Model 2

- (JHU) cases
- (GT) Nasal congestion
- (GT) fever

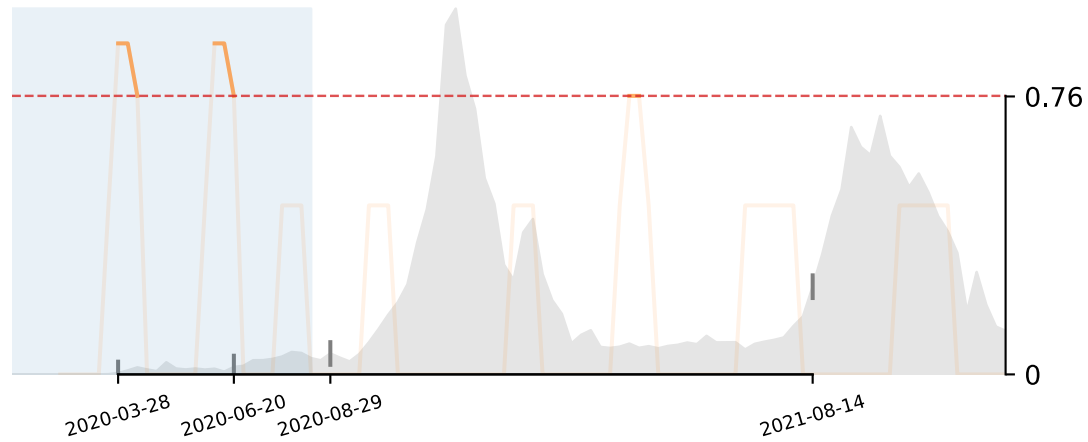

Model 3

- (GT) fever
- (GT) covid symptoms
- (GT) Nasal congestion
- (JHU) cases
- (GT) Cardiac arrest

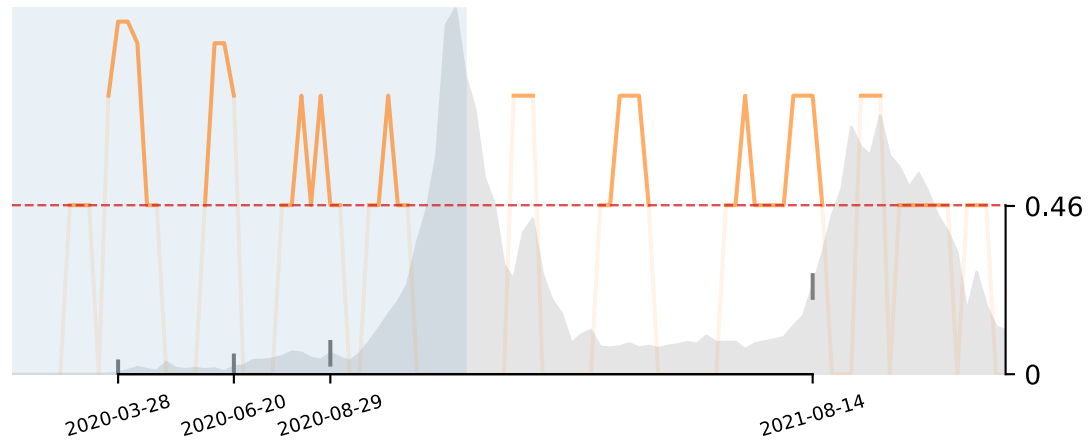

## Performance as a function of $\beta$

| $\beta$ | Training |    |    | Out of sample |    |    |
|---------|----------|----|----|---------------|----|----|
|         | tp       | fp | fn | tp            | fp | fn |
| 1.00    | 0        | 0  | 1  | 0             | 0  | 3  |
| 0.99    | 0        | 0  | 1  | 0             | 0  | 3  |
| 0.96    | 0        | 0  | 1  | 0             | 0  | 3  |
| 0.91    | 1        | 1  | 0  | 0             | 0  | 3  |
| 0.76    | 1        | 1  | 0  | 2             | 11 | 1  |
| 0.46    | 1        | 2  | 0  | 3             | 38 | 0  |
| 0.00    | 1        | 2  | 0  | 3             | 66 | 0  |

| $\beta$ | tp fp fn |   |   | tp fp fn |    |   |
|---------|----------|---|---|----------|----|---|
|         | 0.91     | 0 | 0 | 2        | 0  | 0 |
| 0.76    | 2        | 1 | 0 | 0        | 2  | 2 |
| 0.46    | 2        | 2 | 0 | 1        | 17 | 1 |
| 0.00    | 2        | 5 | 0 | 2        | 63 | 0 |

| $\beta$ | tp fp fn |    |   | tp fp fn |    |   |
|---------|----------|----|---|----------|----|---|
|         | 0.99     | 0  | 0 | 3        | 0  | 0 |
| 0.96    | 0        | 0  | 3 | 0        | 0  | 1 |
| 0.91    | 1        | 1  | 2 | 0        | 0  | 1 |
| 0.76    | 2        | 2  | 1 | 1        | 10 | 0 |
| 0.46    | 3        | 3  | 0 | 1        | 25 | 0 |
| 0.00    | 3        | 12 | 0 | 1        | 49 | 0 |

Figures S188-S189.

Comparative analysis between the outbreak onset dates as created by using Parag's method against the CDC's daily transmission levels. (A) represents a histogram on the number of 'associated events' between both sources (associated events occur in time within a time difference of at most 6 weeks). (B) Represents the timing (in weeks) between associated events over all counties. (C) The number of non-associated onsets within the CDC's data. Panels (D) and (E) show a count of the number of events expected to see within a county.

Similarity (% of CDC onsets associated to Parag onsets per location)

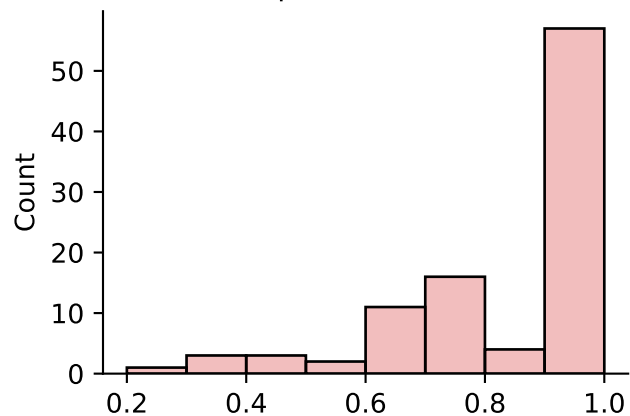

Number of Weeks between CDC and Parag event dates

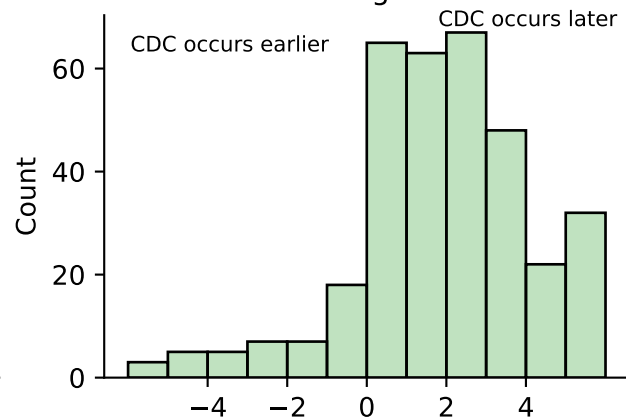

Number of CDC event dates non-related to Parag event dates

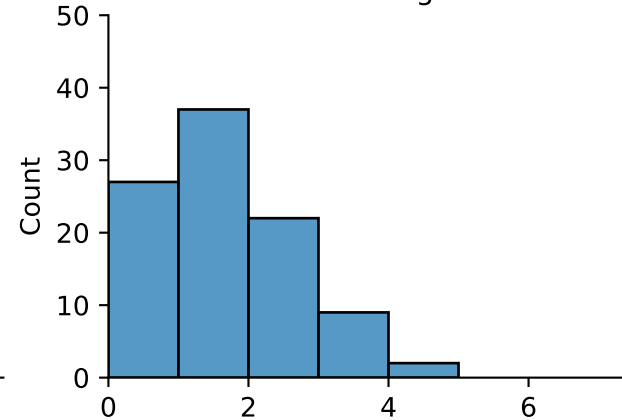

Total number of Parag event dates (per location)

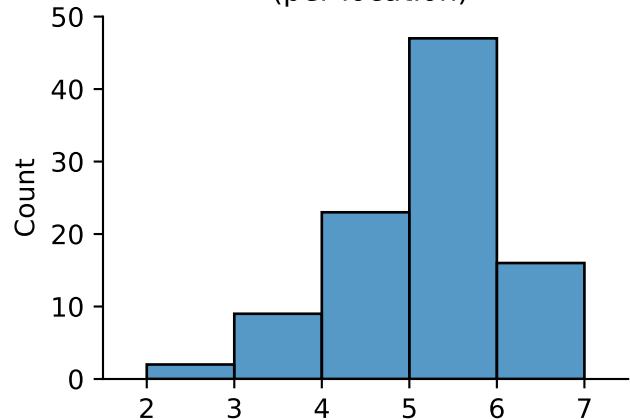

Total number of CDC event dates (per location)

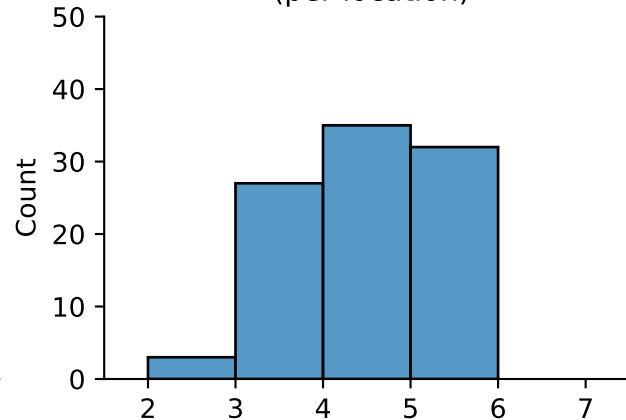

Similarity (% of CDC onsets associated to Parag onsets per location)

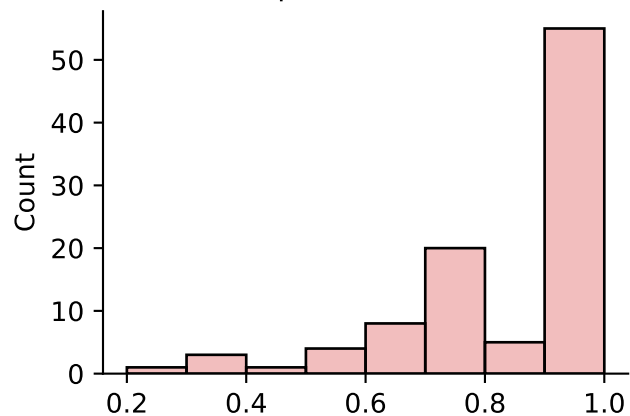

Number of Weeks between CDC and Parag event dates

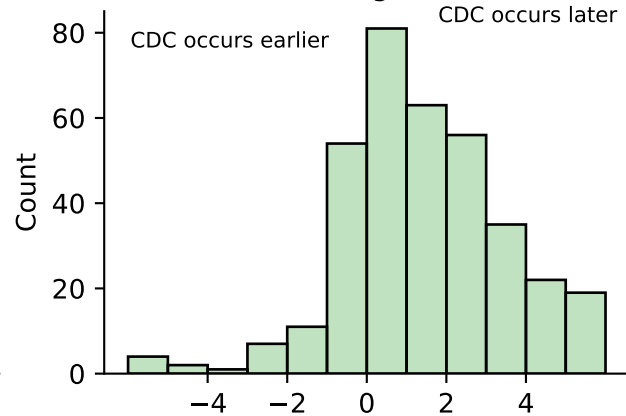

Number of CDC event dates non-related to Parag event dates

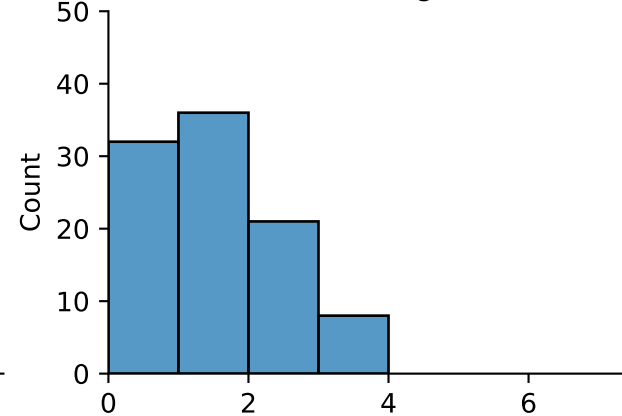

Total number of Parag event dates (per location)

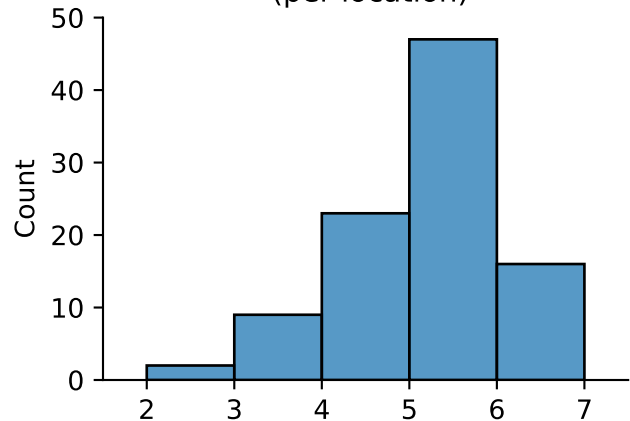

Total number of CDC event dates (per location)

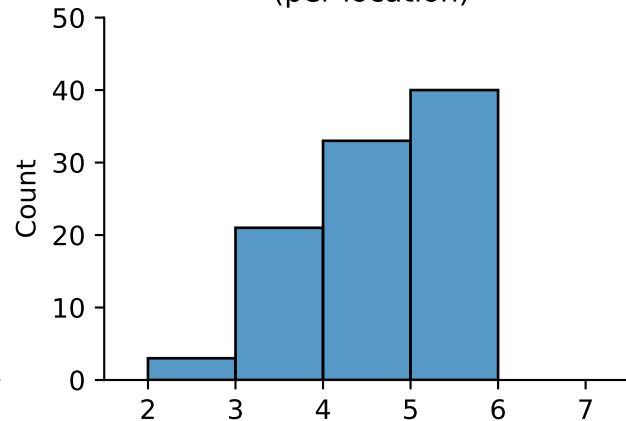

Figures S190-S286.

Visual comparison (per county) of the probability of resurgence (timeseries in green, onsets as vertical dotted red lines), against the onsets generated using CDC's COVID-19 transmission-level data (timeseries in blue, onsets as vertical blue tick marks).

- Number of days on 'High' transmission per week
- Threshold to mark the beginning of epidemic event for CDC signal
- CDC beginning of events
- $r_o$  (Parag's method)

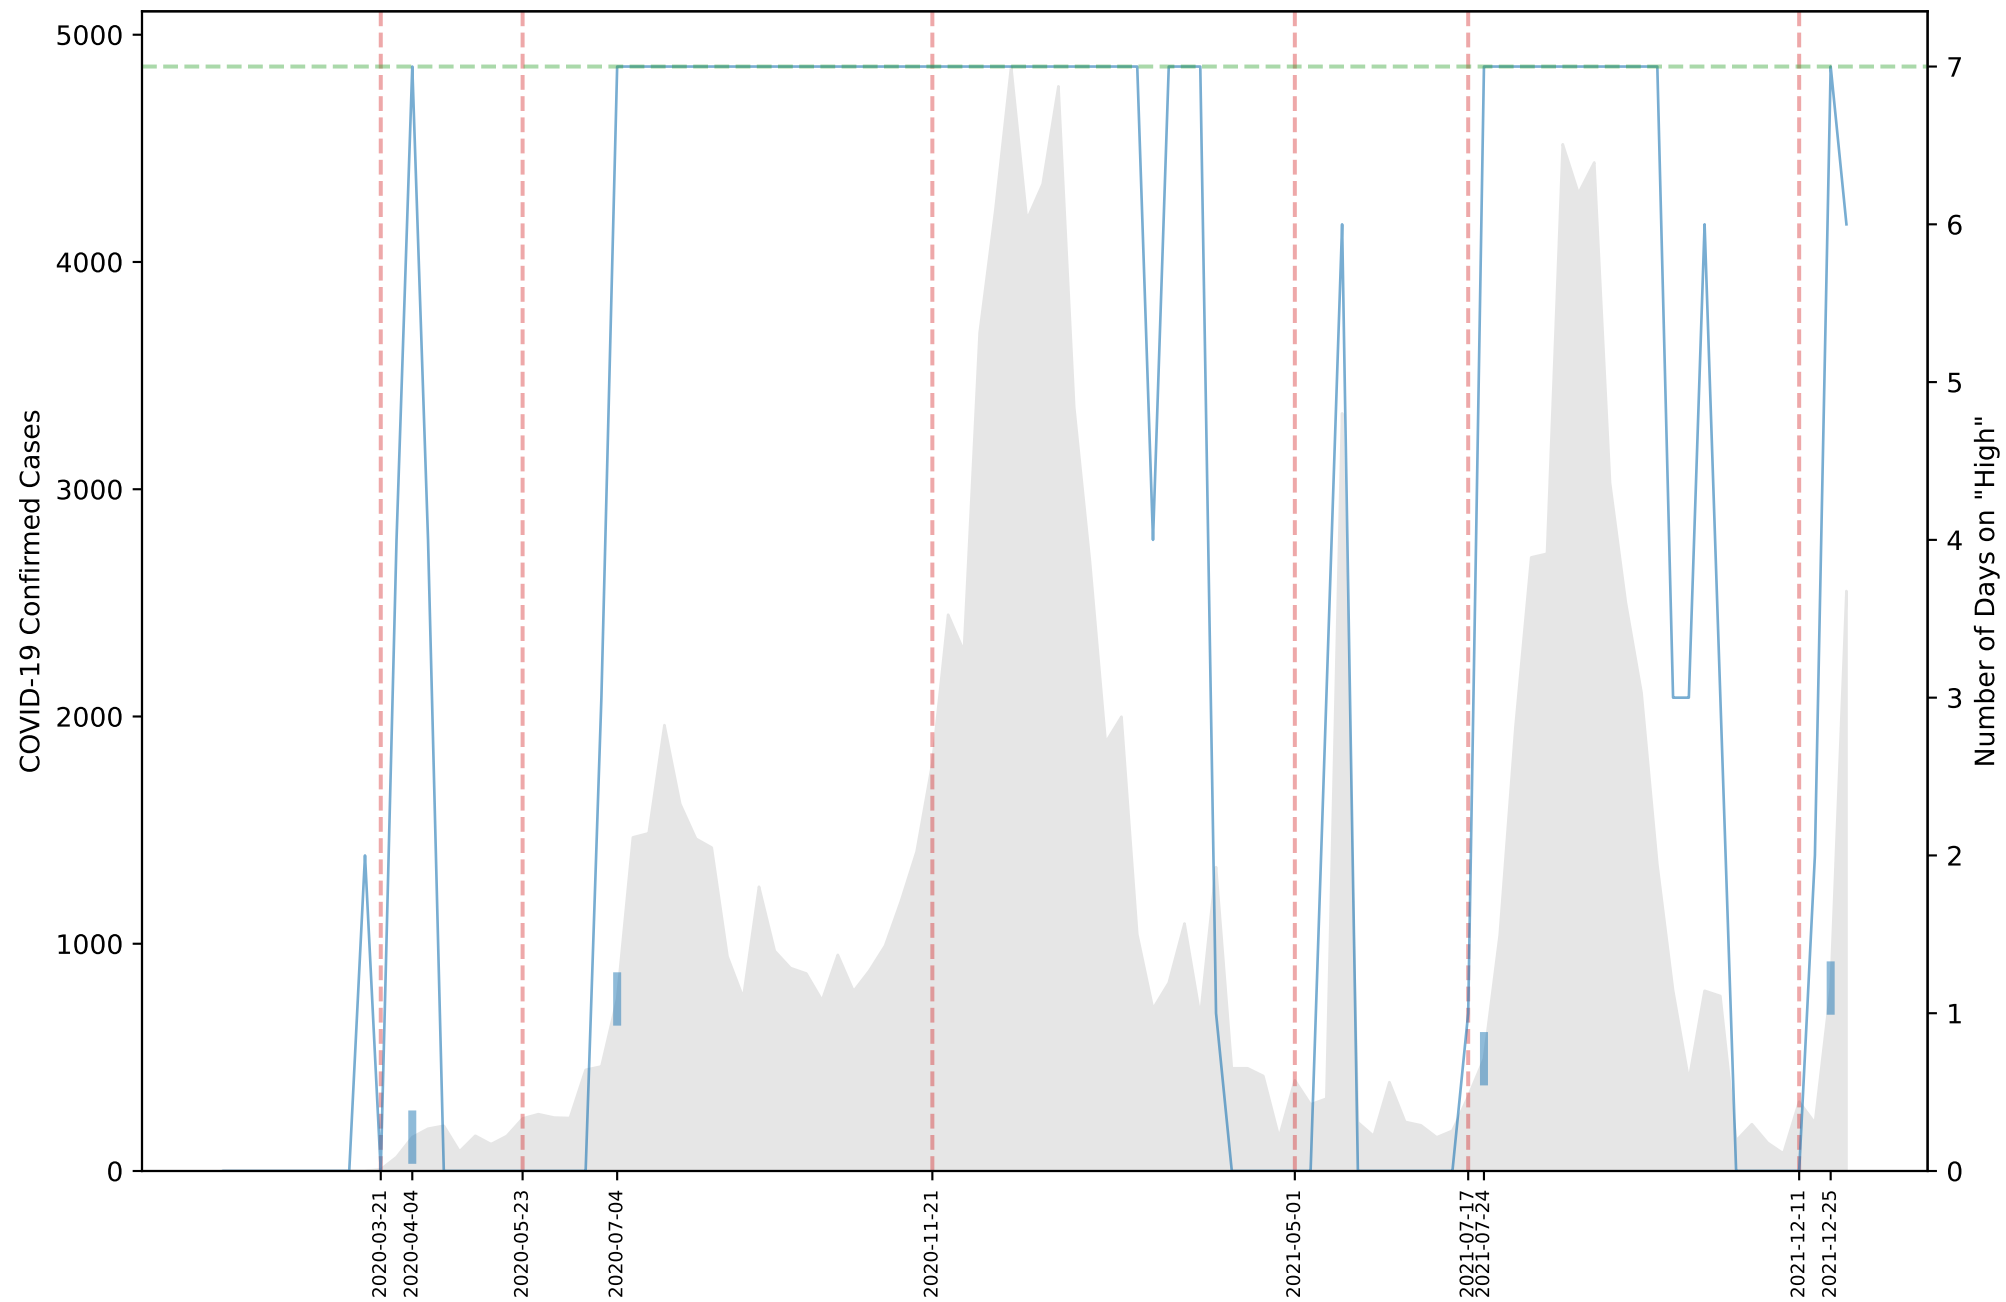



- Number of days on 'High' transmission per week
- - - Threshold to mark the beginning of epidemic event for CDC signal
- █ CDC beginning of events
- - -  $r_o$  (Parag's method)

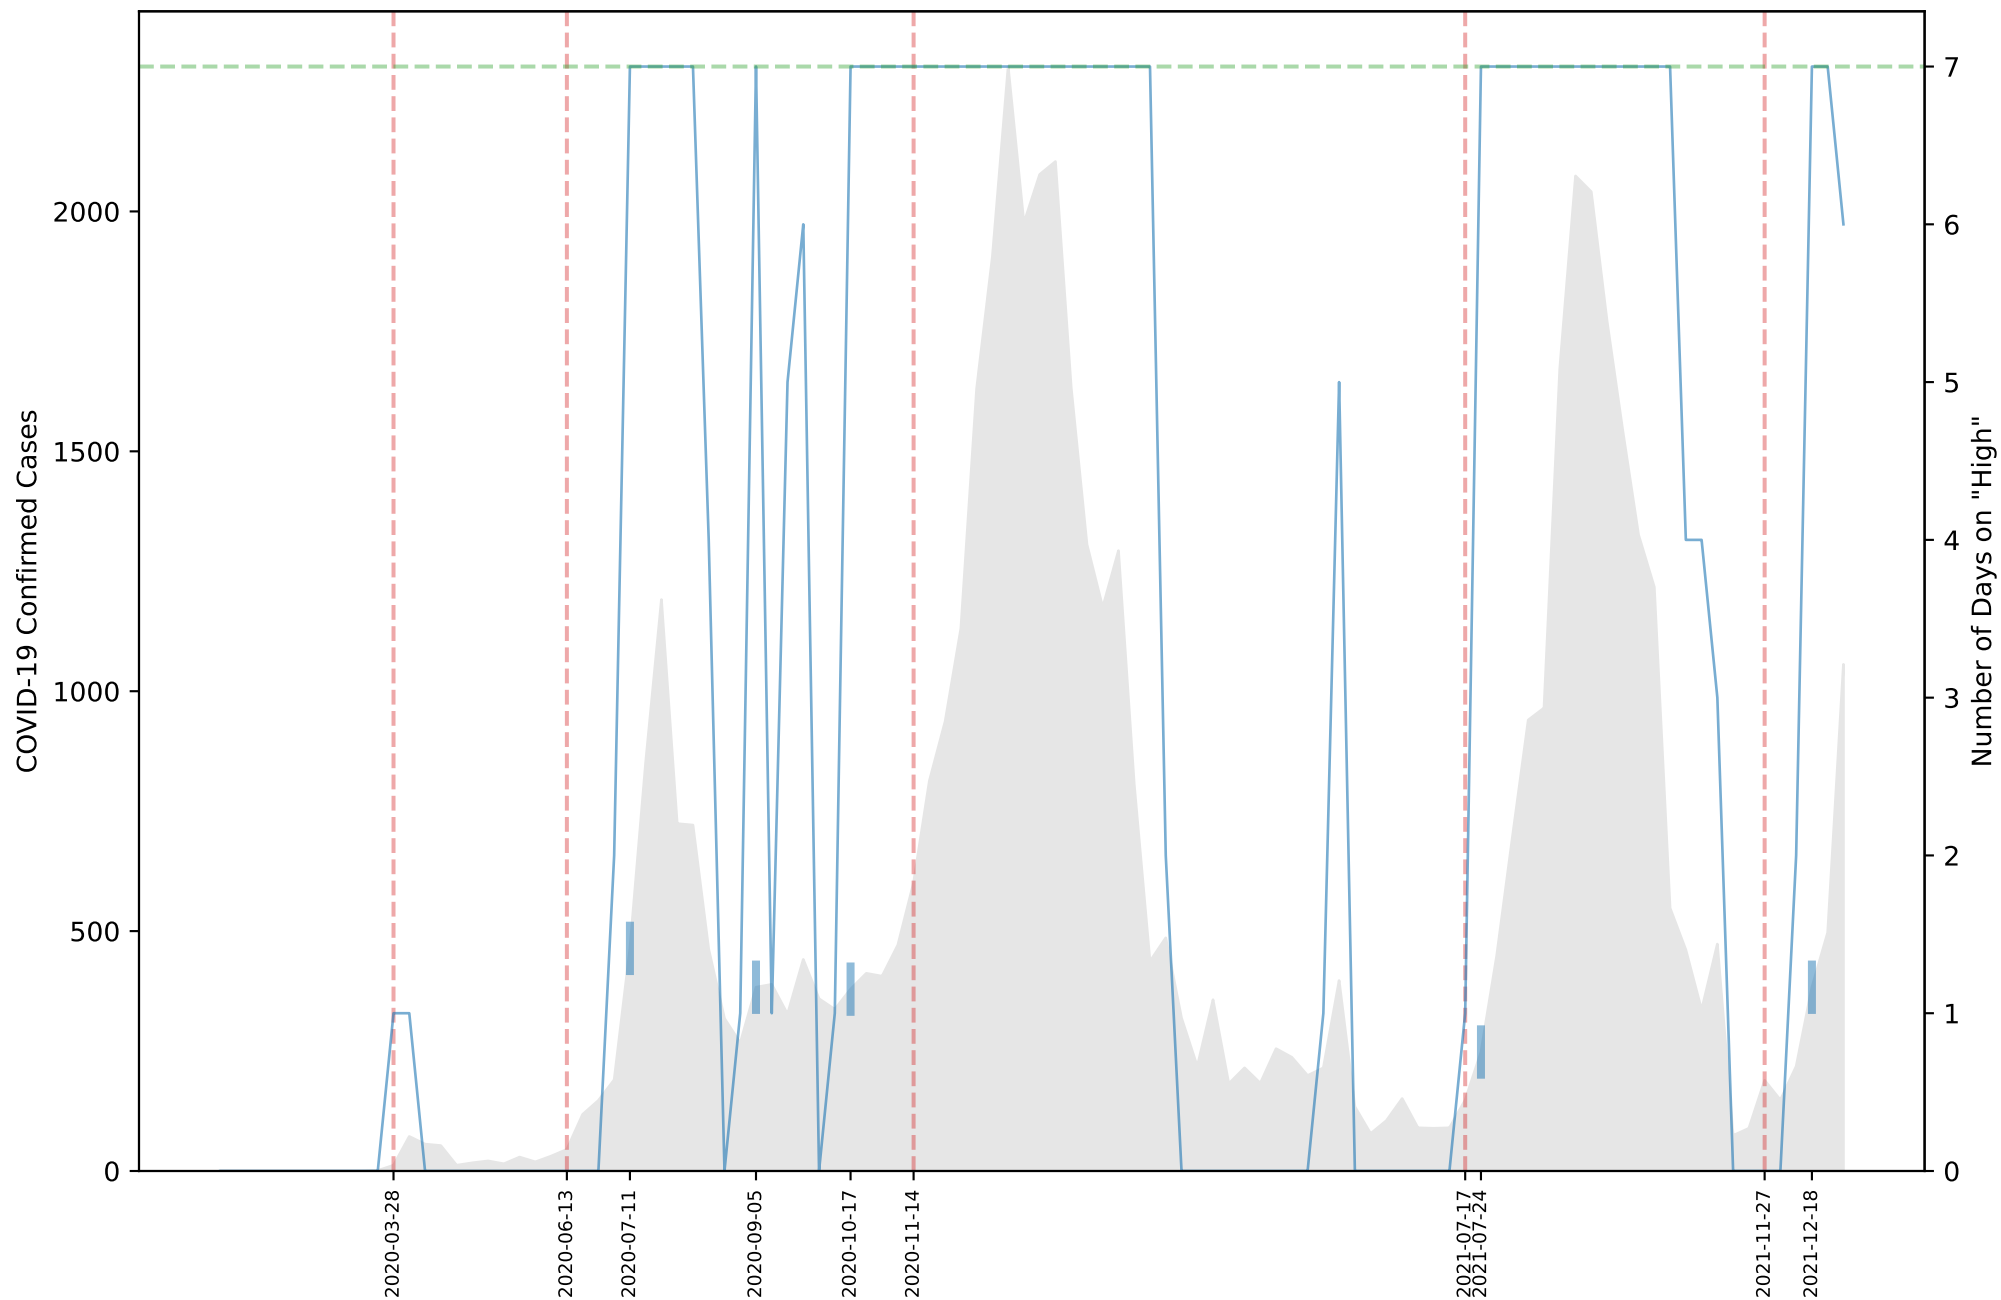

# AR, Pulaski

S192

- Number of days on 'High' transmission per week
- - - Threshold to mark the beginning of epidemic event for CDC signal
- █ CDC beginning of events
- - -  $r_o$  (Parag's method)

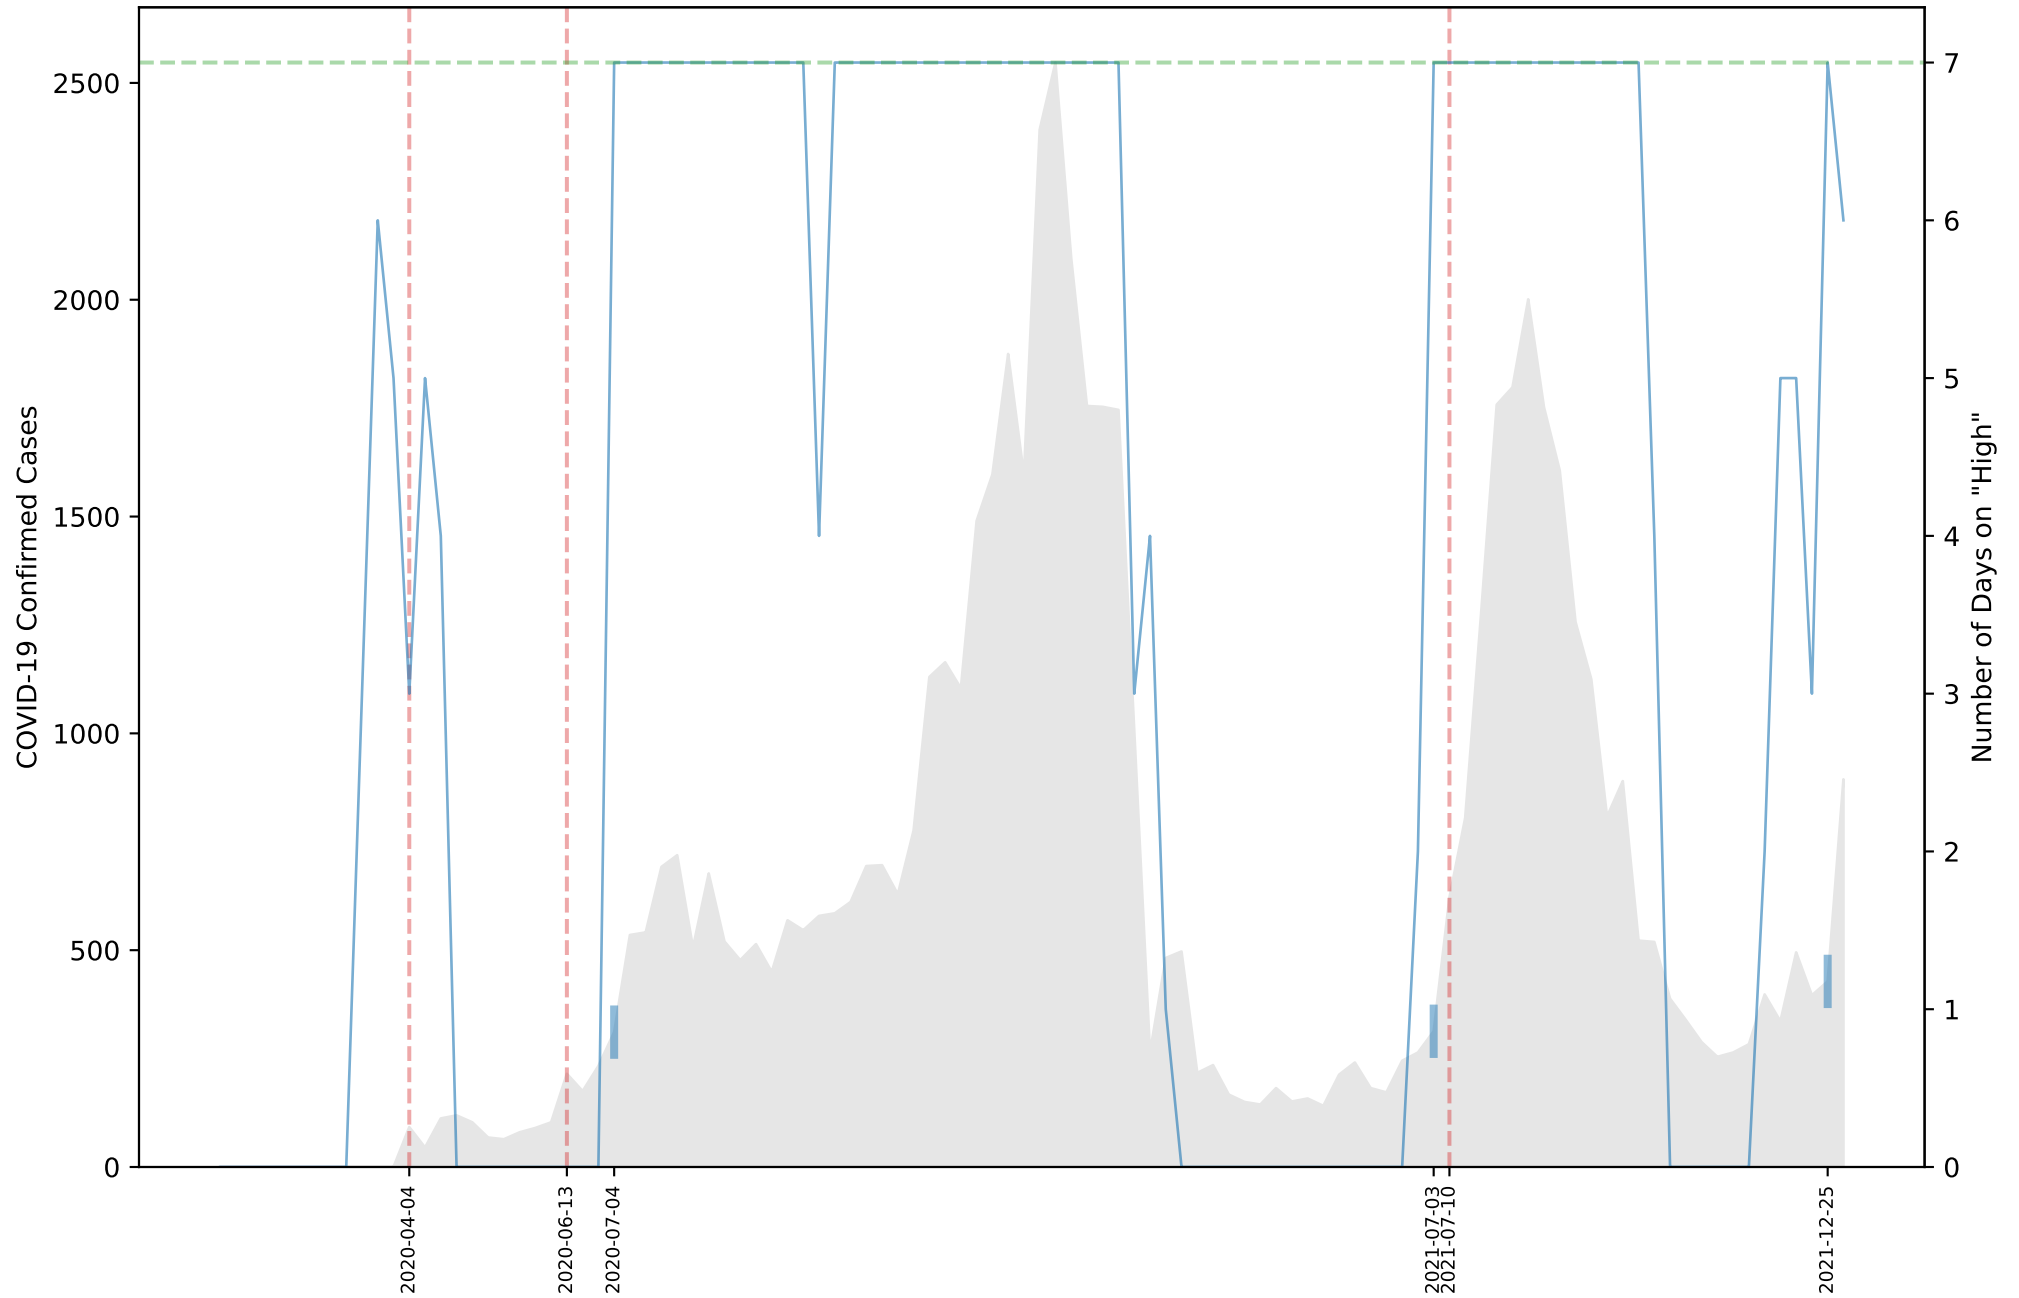

- Number of days on 'High' transmission per week
- - - Threshold to mark the beginning of epidemic event for CDC signal
- █ CDC beginning of events
- - -  $r_o$  (Parag's method)

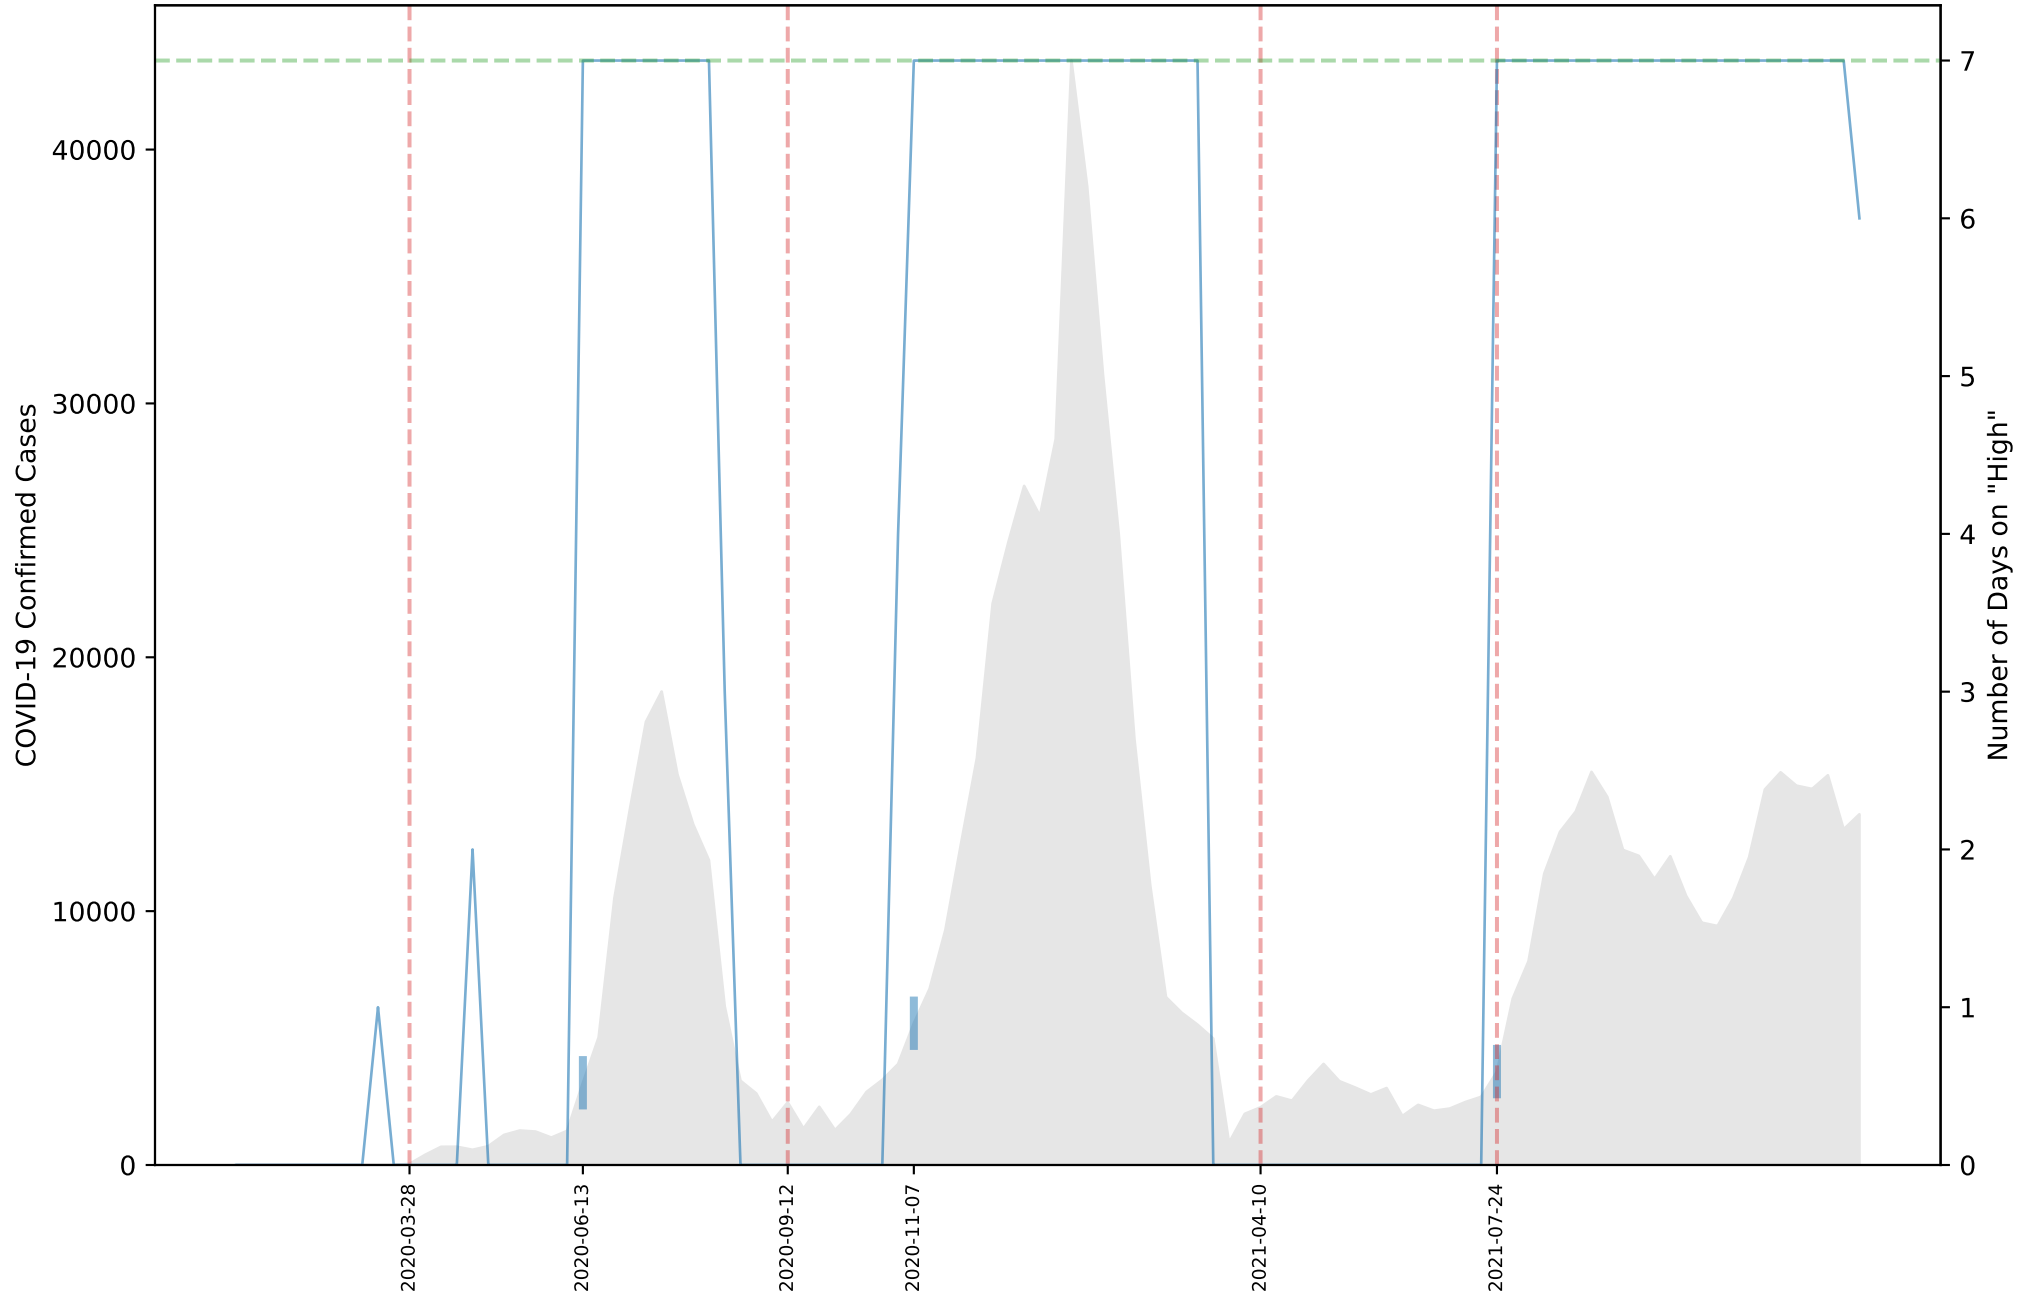

- Number of days on 'High' transmission per week
- - - Threshold to mark the beginning of epidemic event for CDC signal
- █ CDC beginning of events
- - -  $r_o$  (Parag's method)

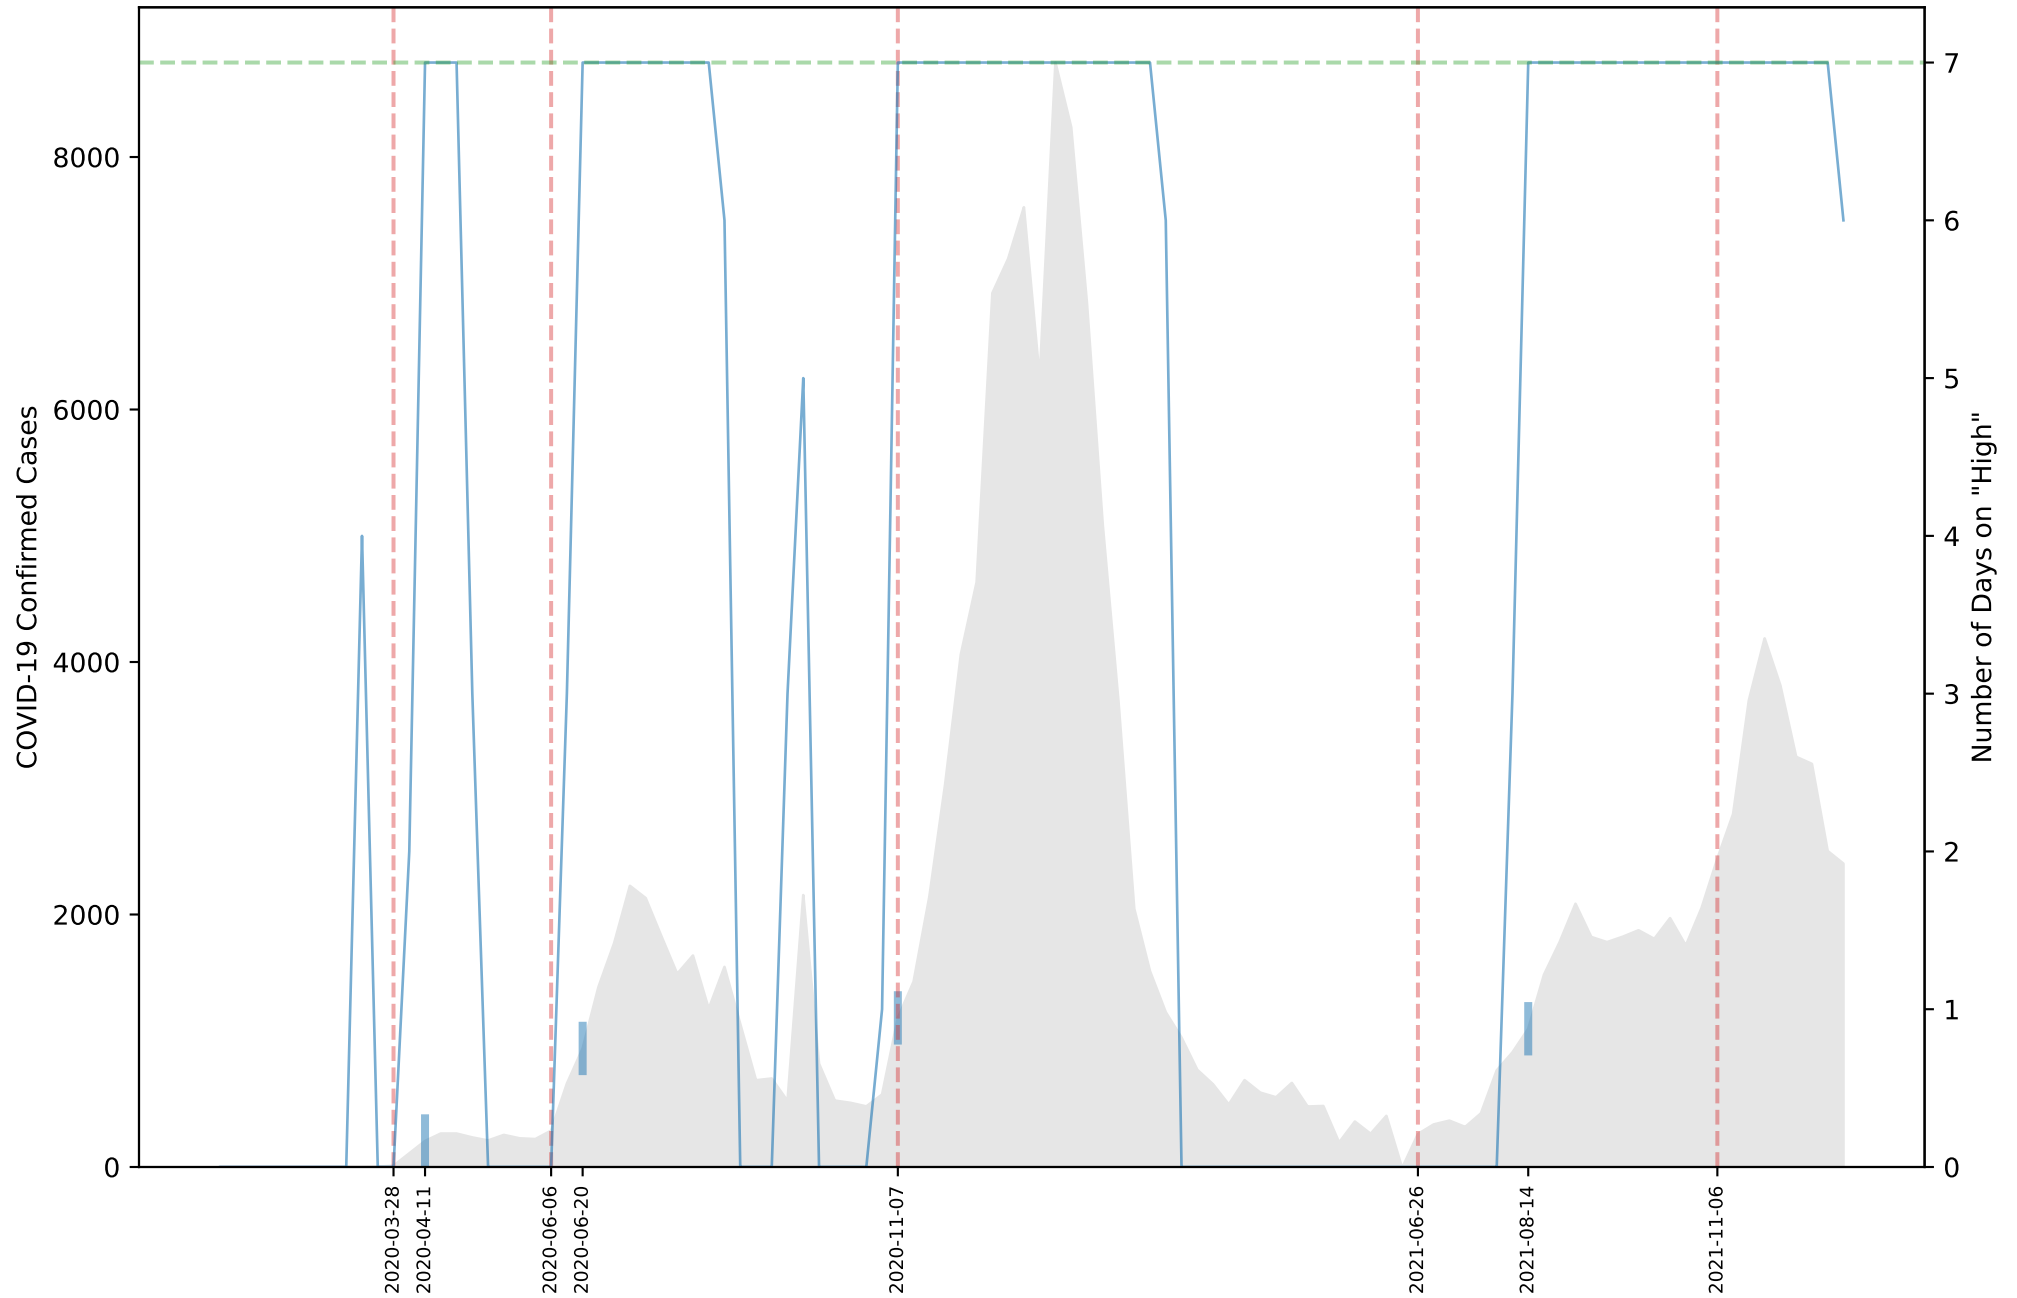

- Number of days on 'High' transmission per week
- - - Threshold to mark the beginning of epidemic event for CDC signal
- █ CDC beginning of events
- - -  $r_o$  (Parag's method)

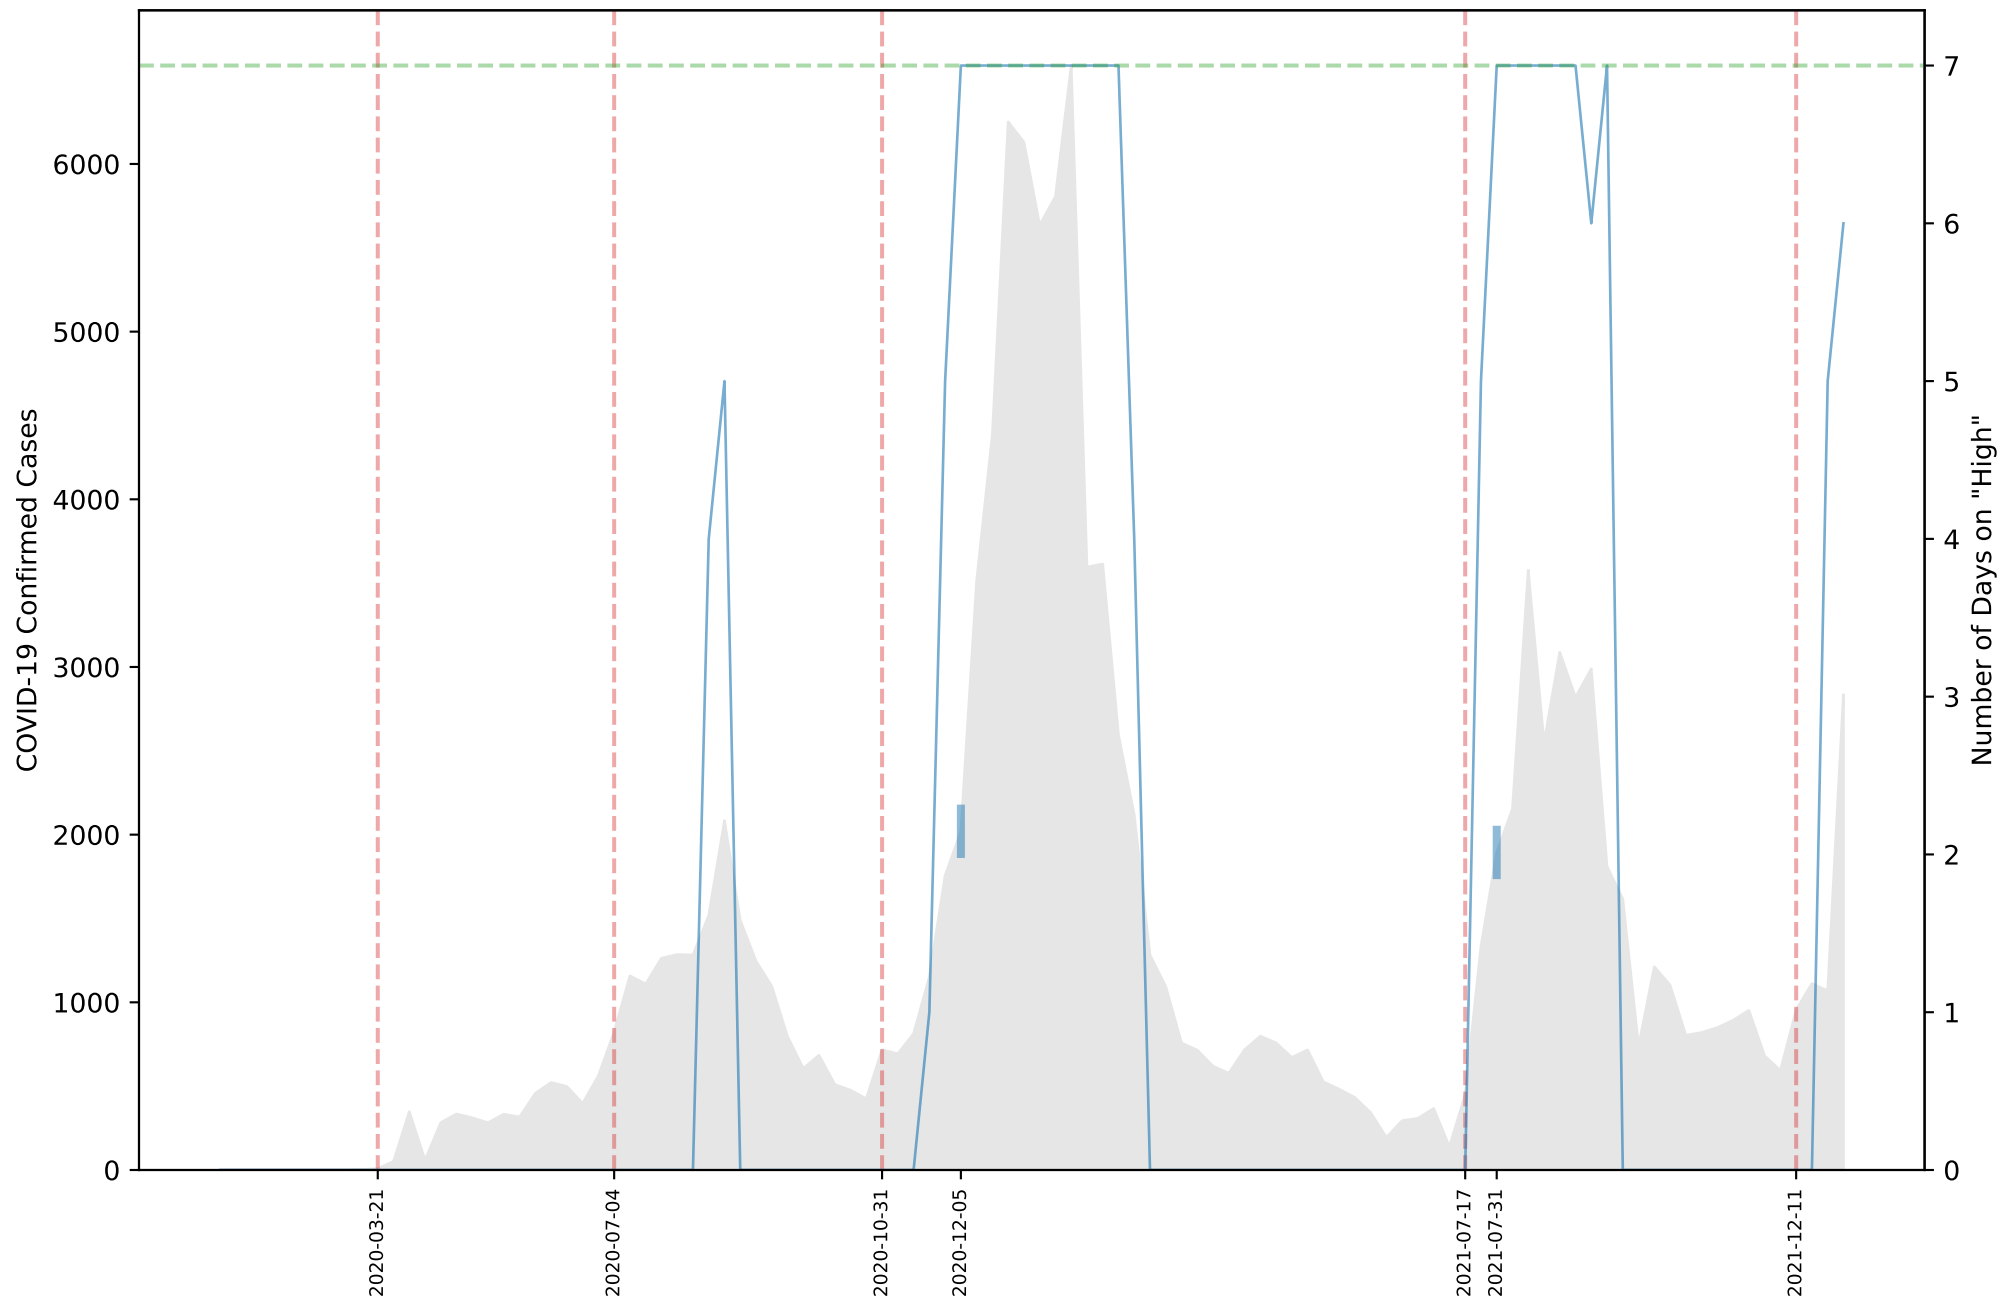

- Number of days on 'High' transmission per week
- - - Threshold to mark the beginning of epidemic event for CDC signal
- █ CDC beginning of events
- - -  $r_0$  (Parag's method)

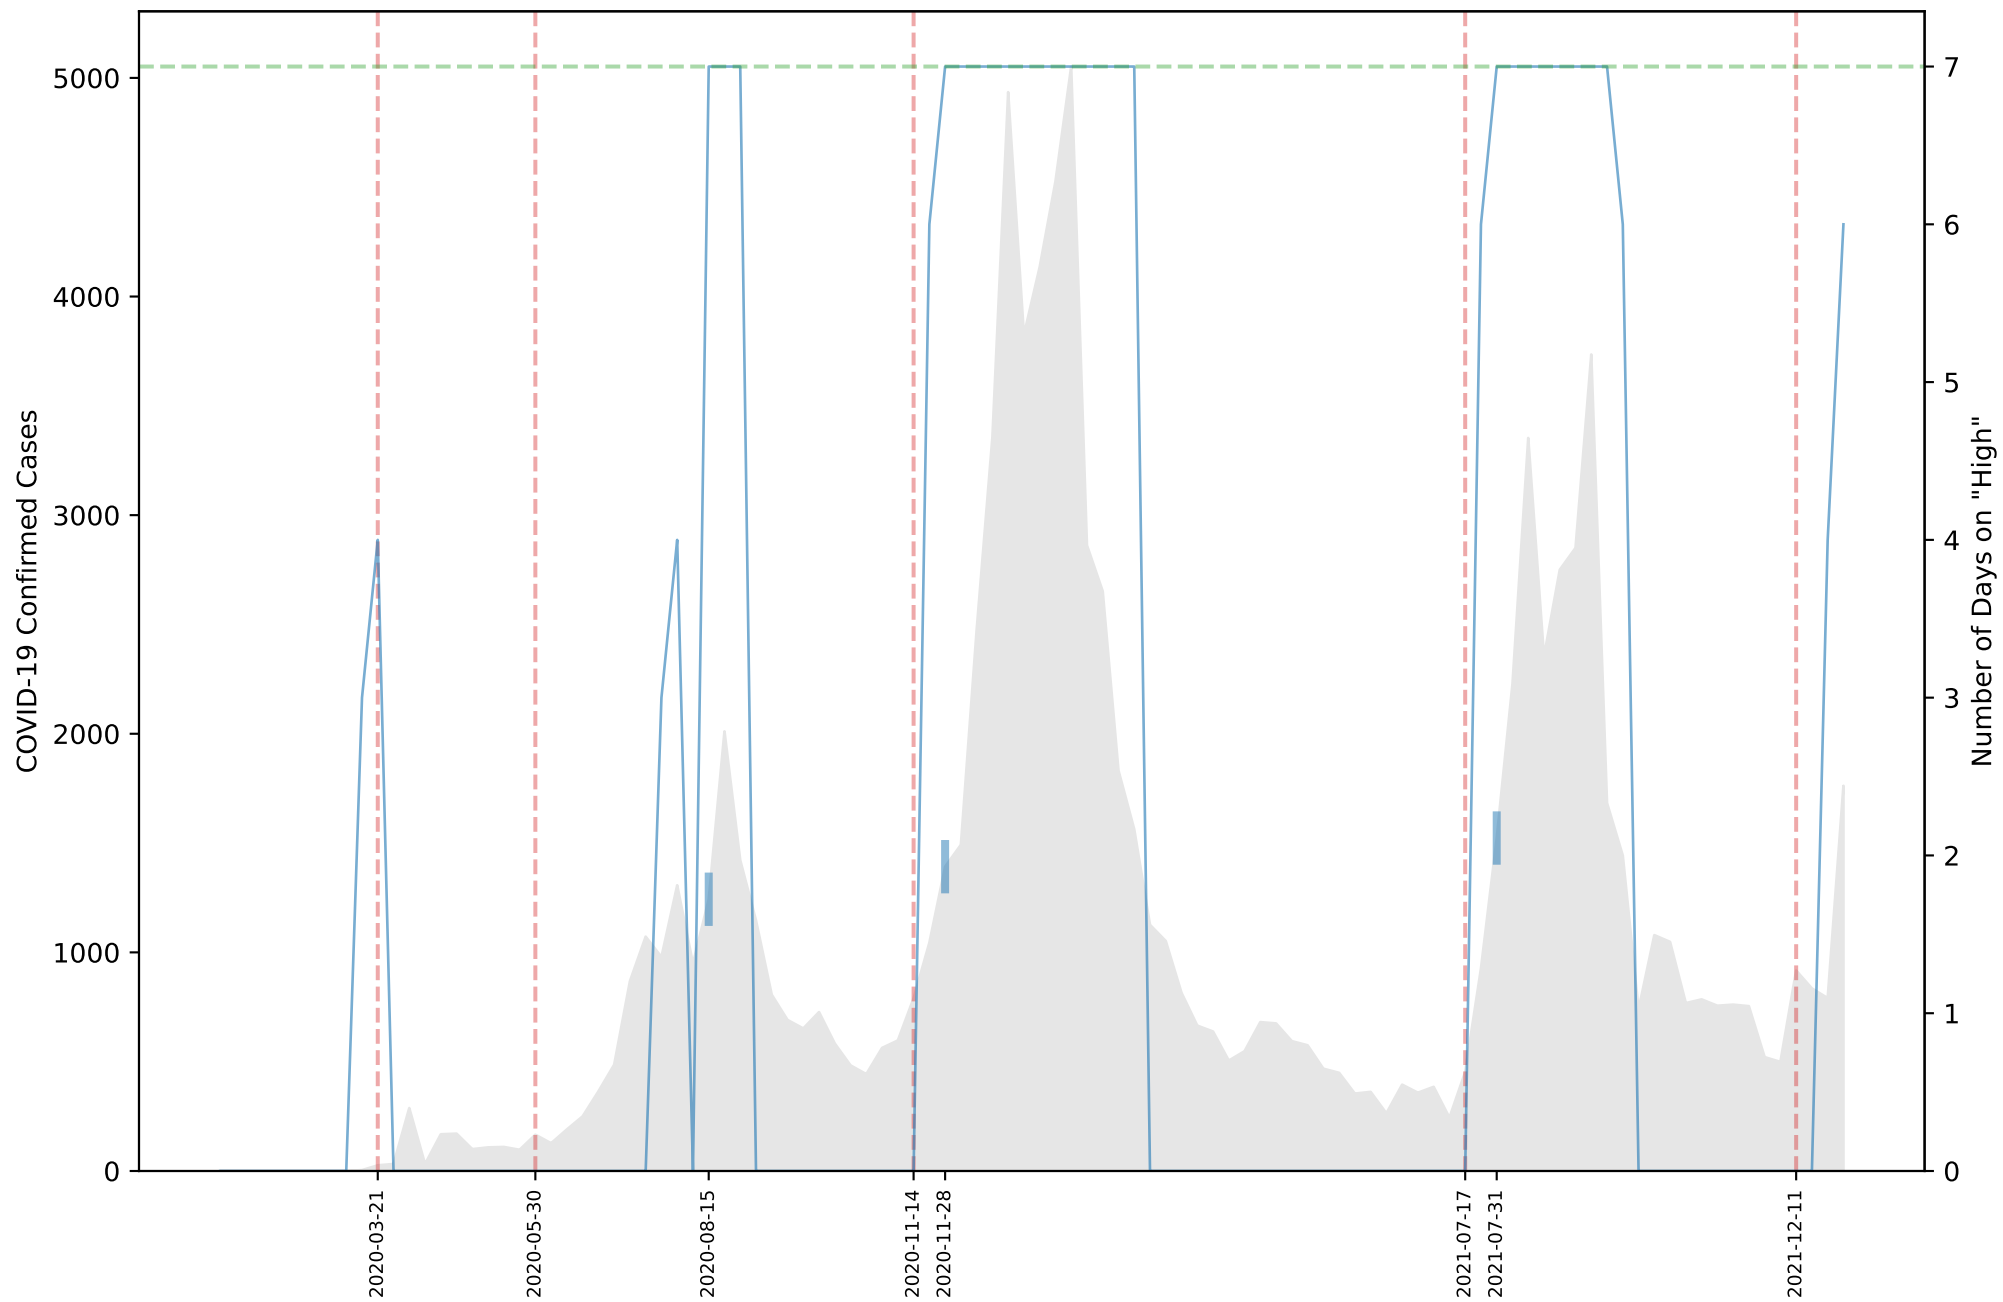

- Number of days on 'High' transmission per week
- - - Threshold to mark the beginning of epidemic event for CDC signal
- █ CDC beginning of events
- - -  $r_o$  (Parag's method)

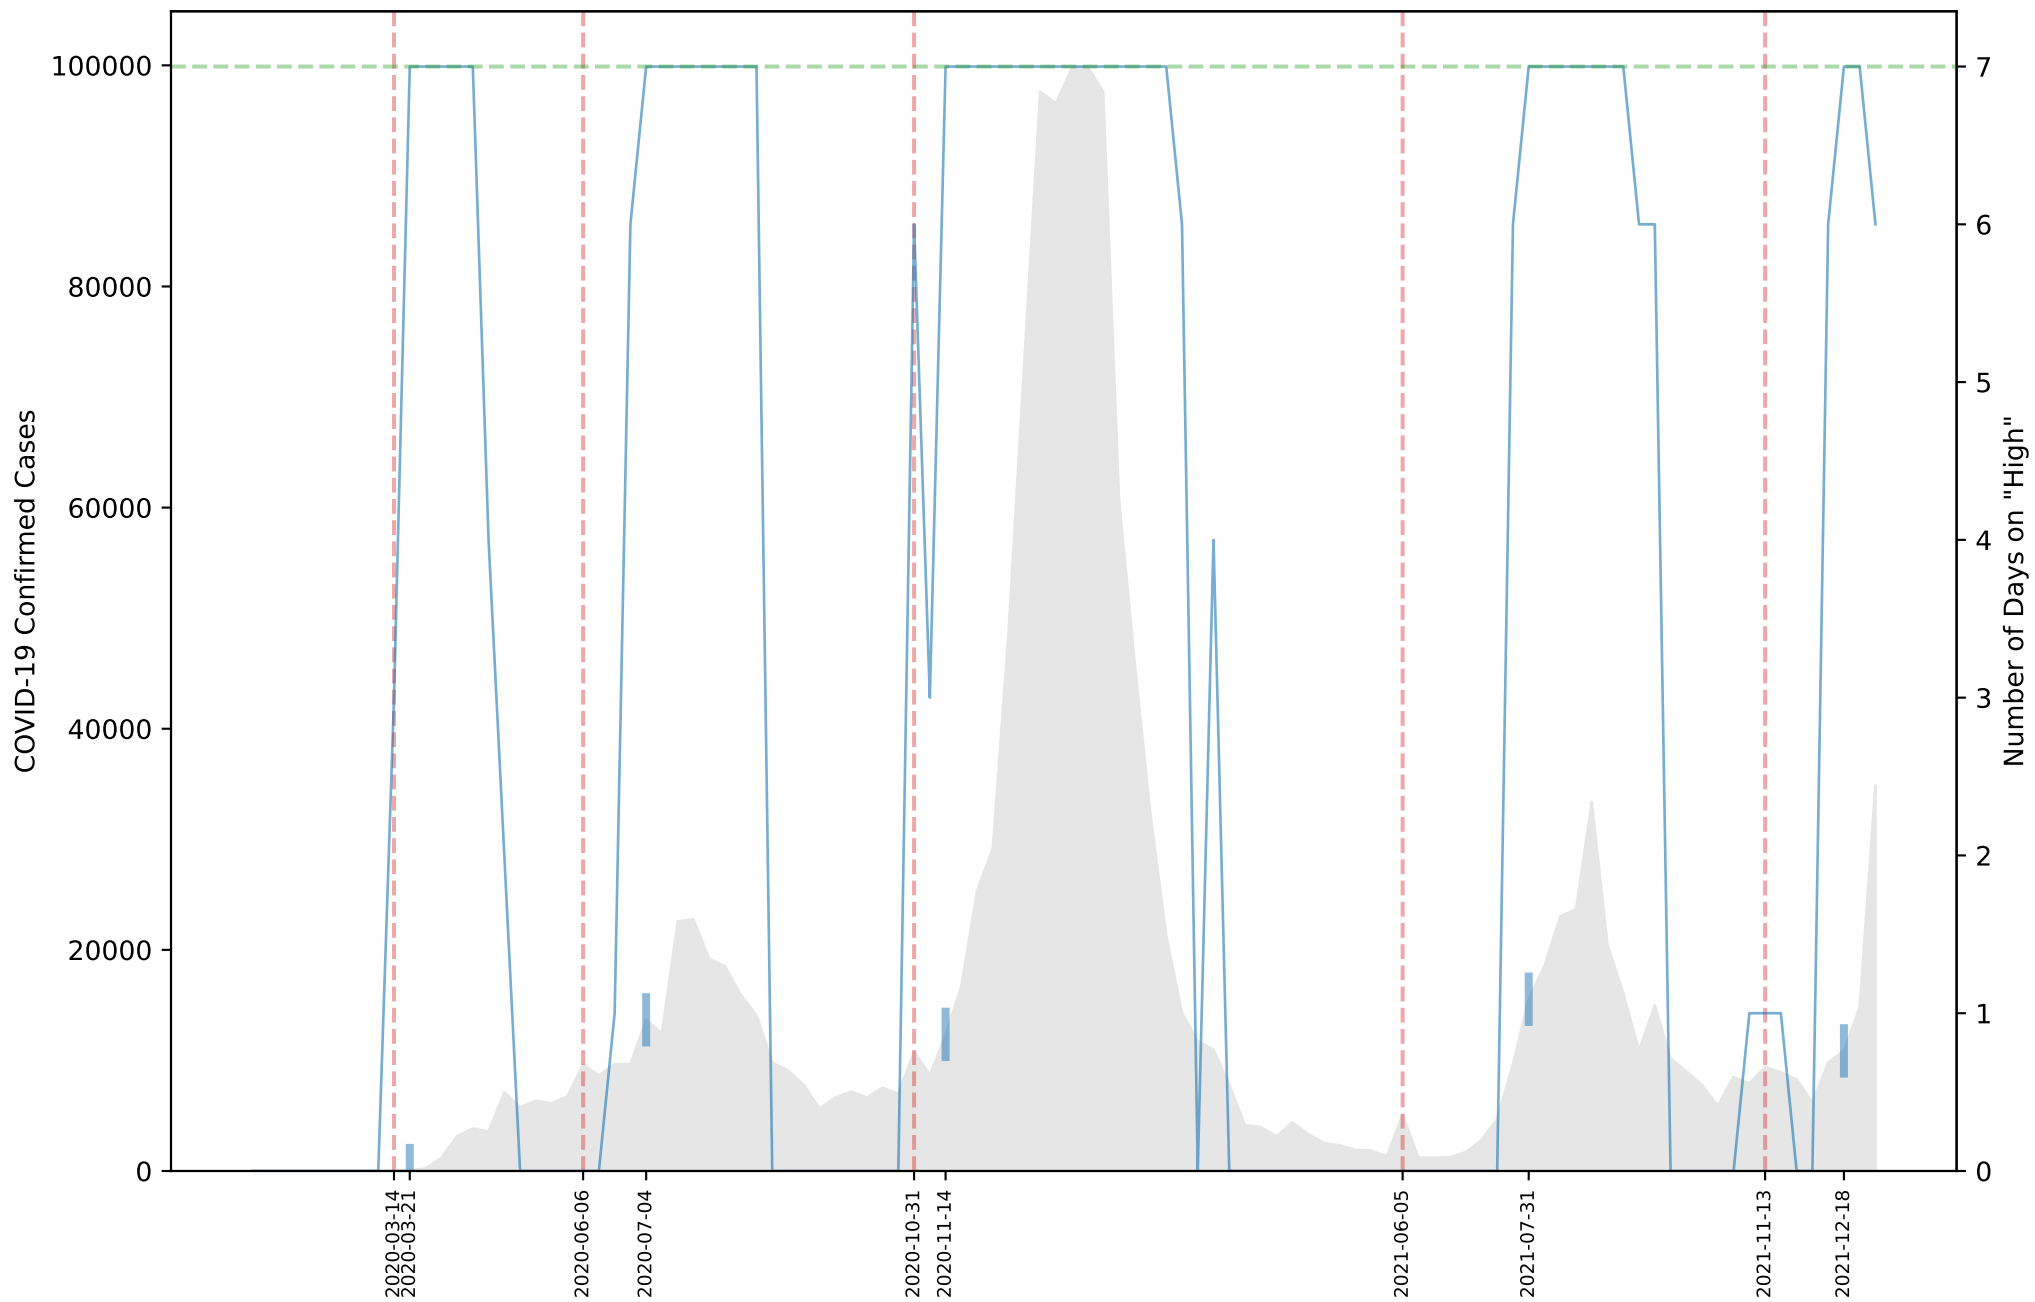

- Number of days on 'High' transmission per week
- - - Threshold to mark the beginning of epidemic event for CDC signal
- █ CDC beginning of events
- - -  $r_o$  (Parag's method)

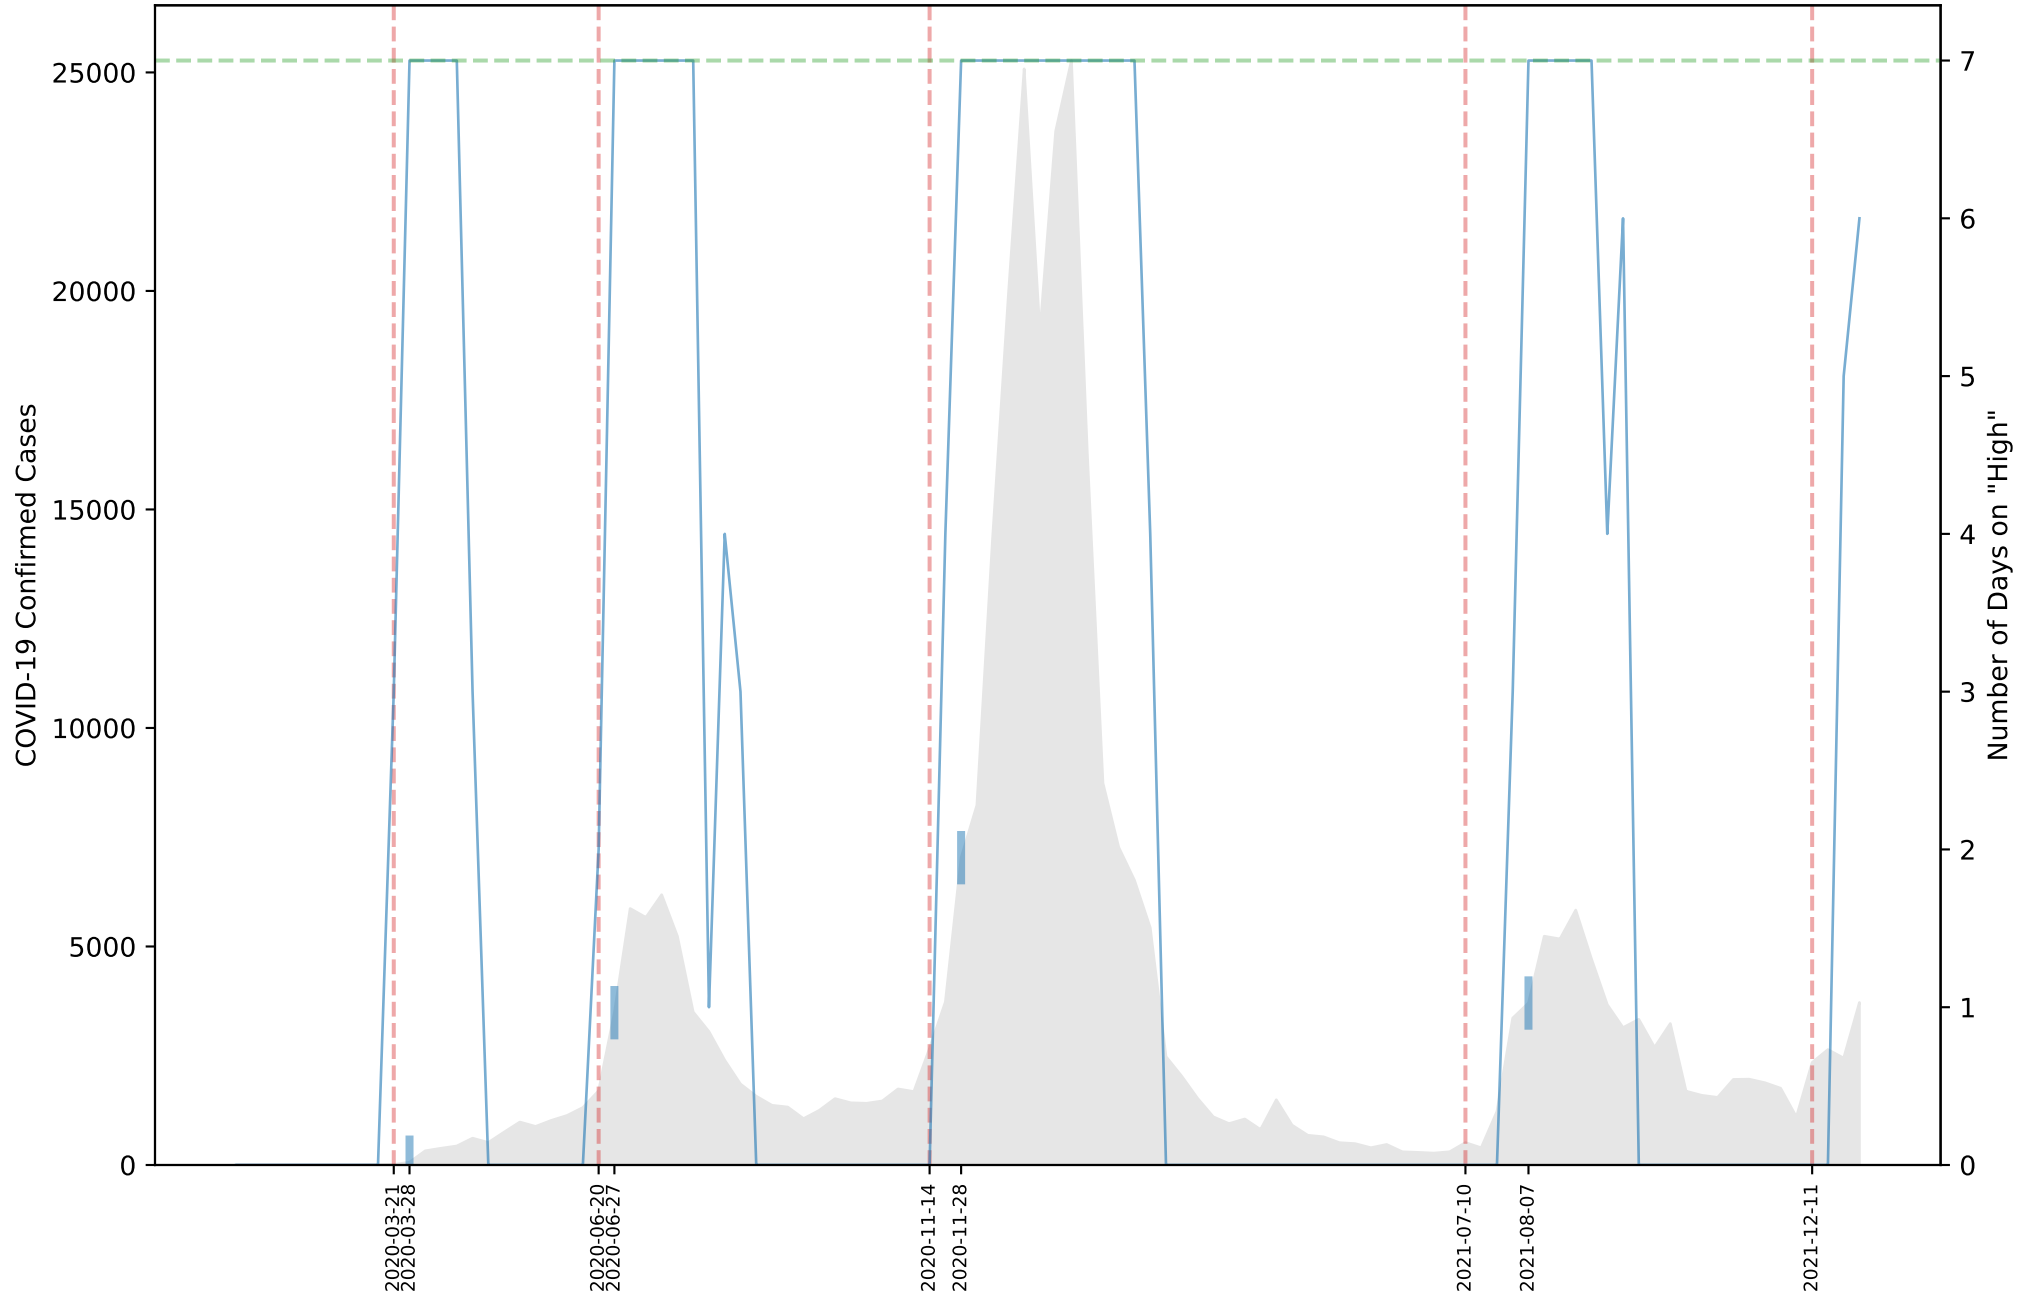



- Number of days on 'High' transmission per week
- Threshold to mark the beginning of epidemic event for CDC signal
- █ CDC beginning of events
- - -  $r_o$  (Parag's method)

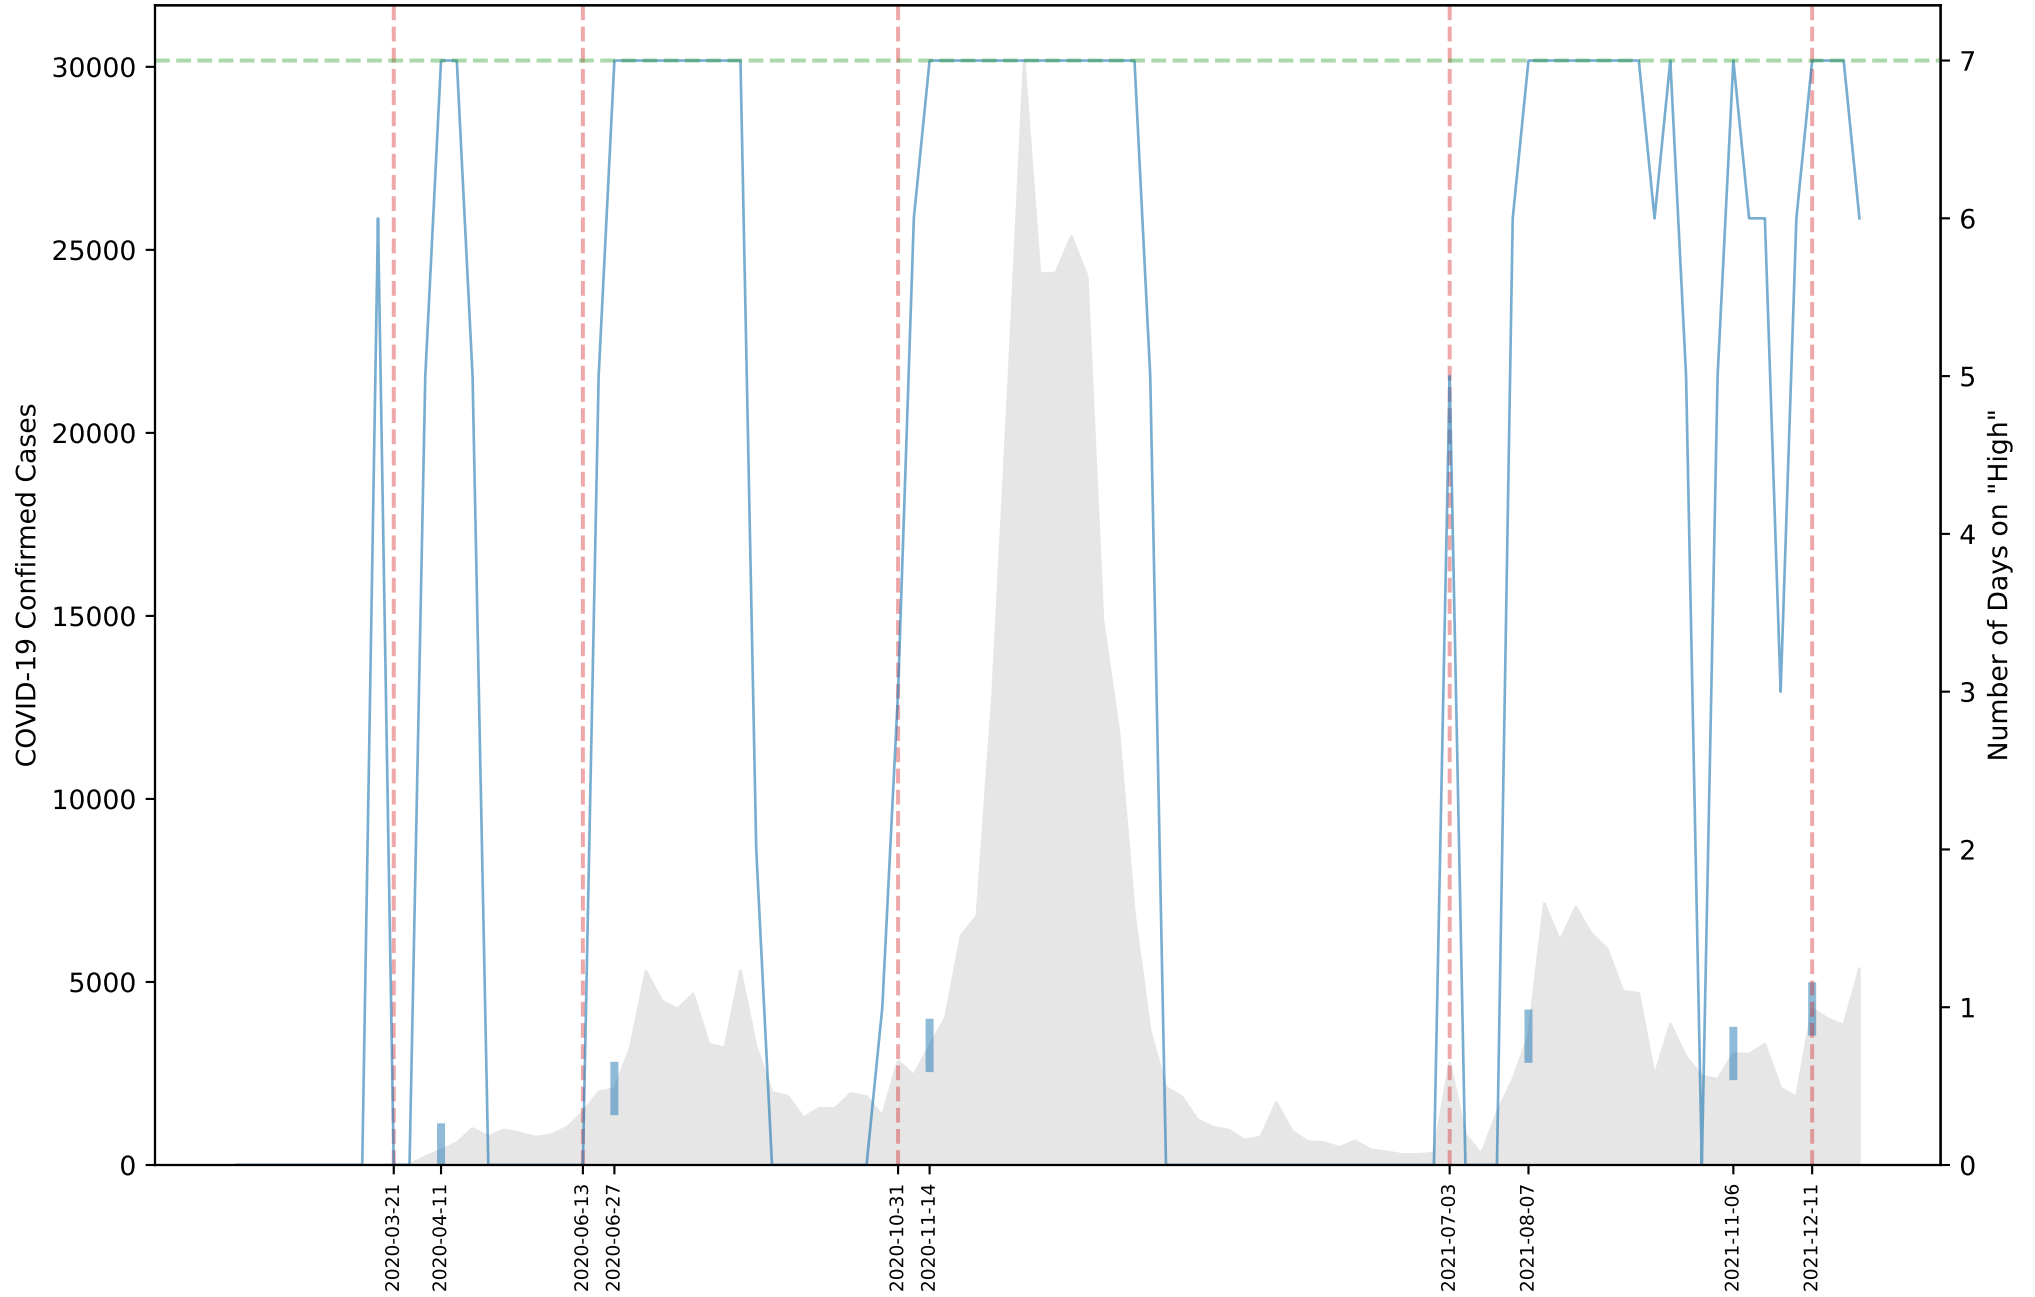

# CA, Sacramento

S200

- Number of days on 'High' transmission per week
- Threshold to mark the beginning of epidemic event for CDC signal
- CDC beginning of events
- $r_o$  (Parag's method)

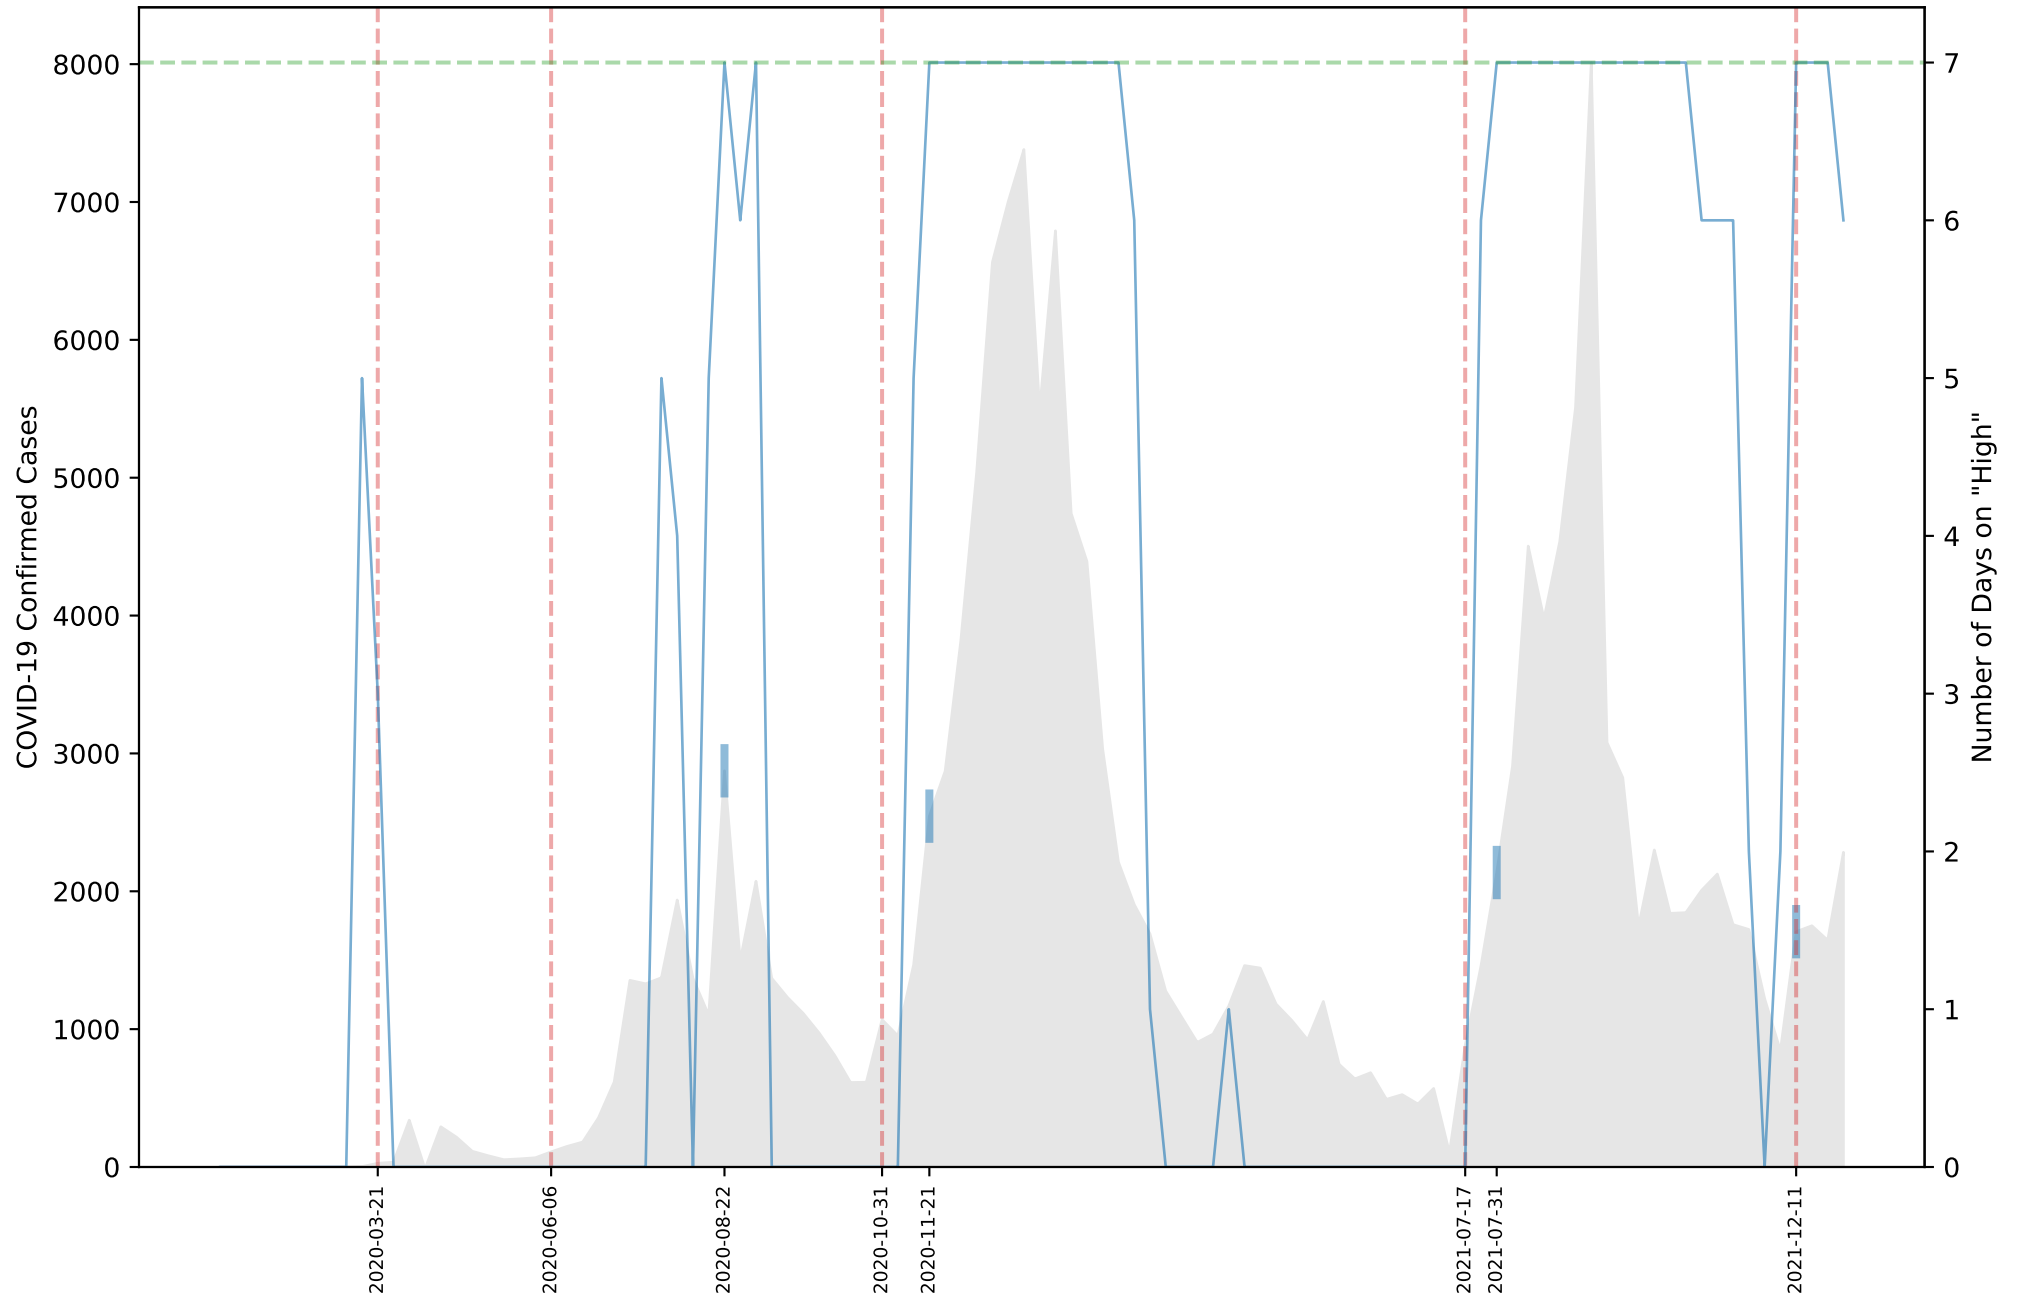

# CA, San Bernardino

# S201

- Number of days on 'High' transmission per week
- Threshold to mark the beginning of epidemic event for CDC signal
- █ CDC beginning of events
- - -  $r_o$  (Parag's method)

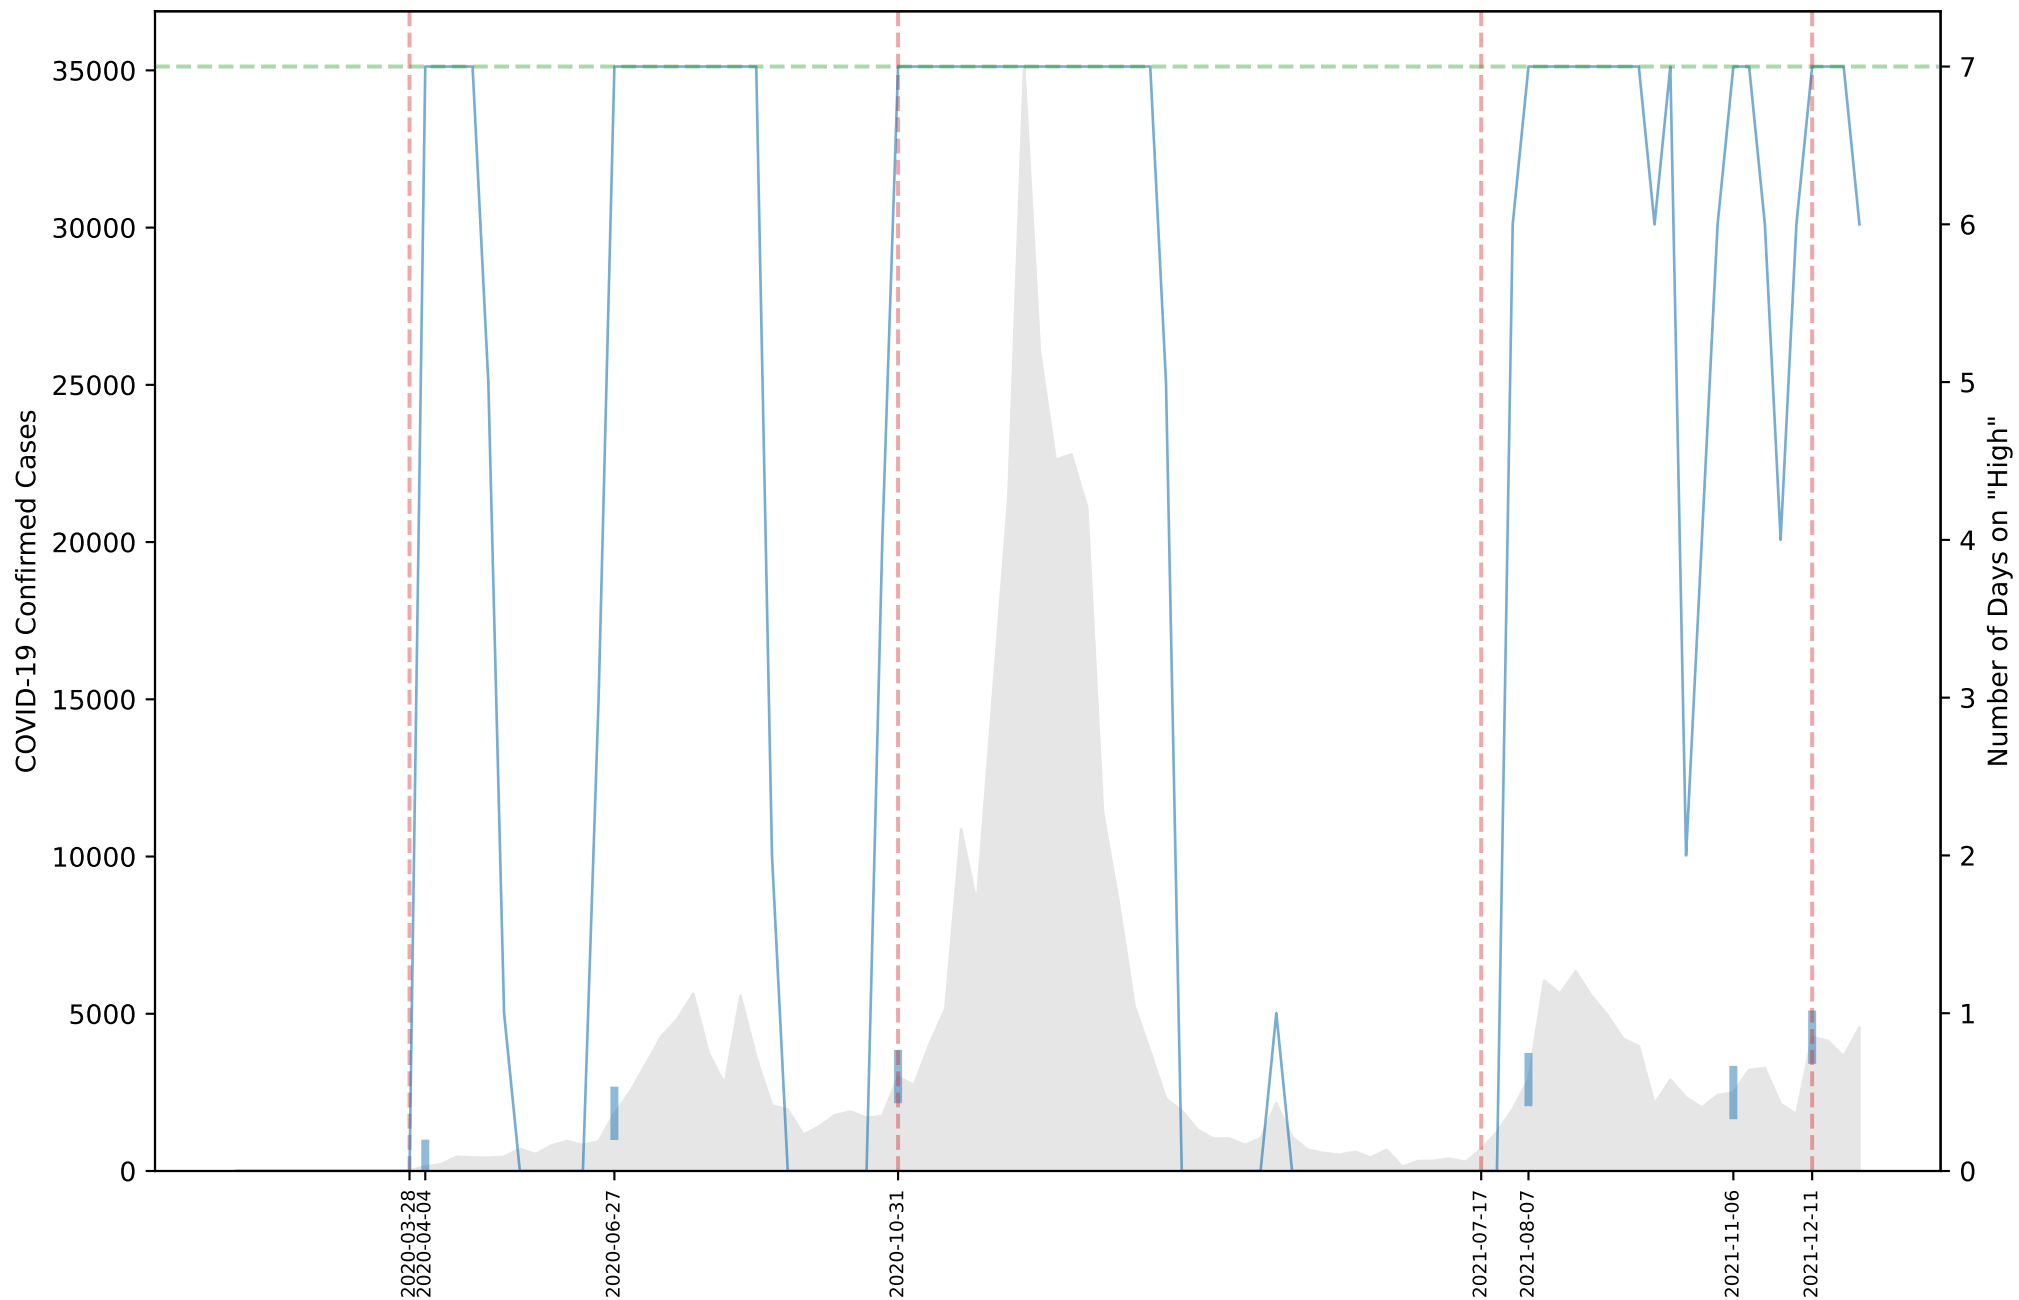

- Number of days on 'High' transmission per week
- - - Threshold to mark the beginning of epidemic event for CDC signal
- █ CDC beginning of events
- - -  $r_0$  (Parag's method)

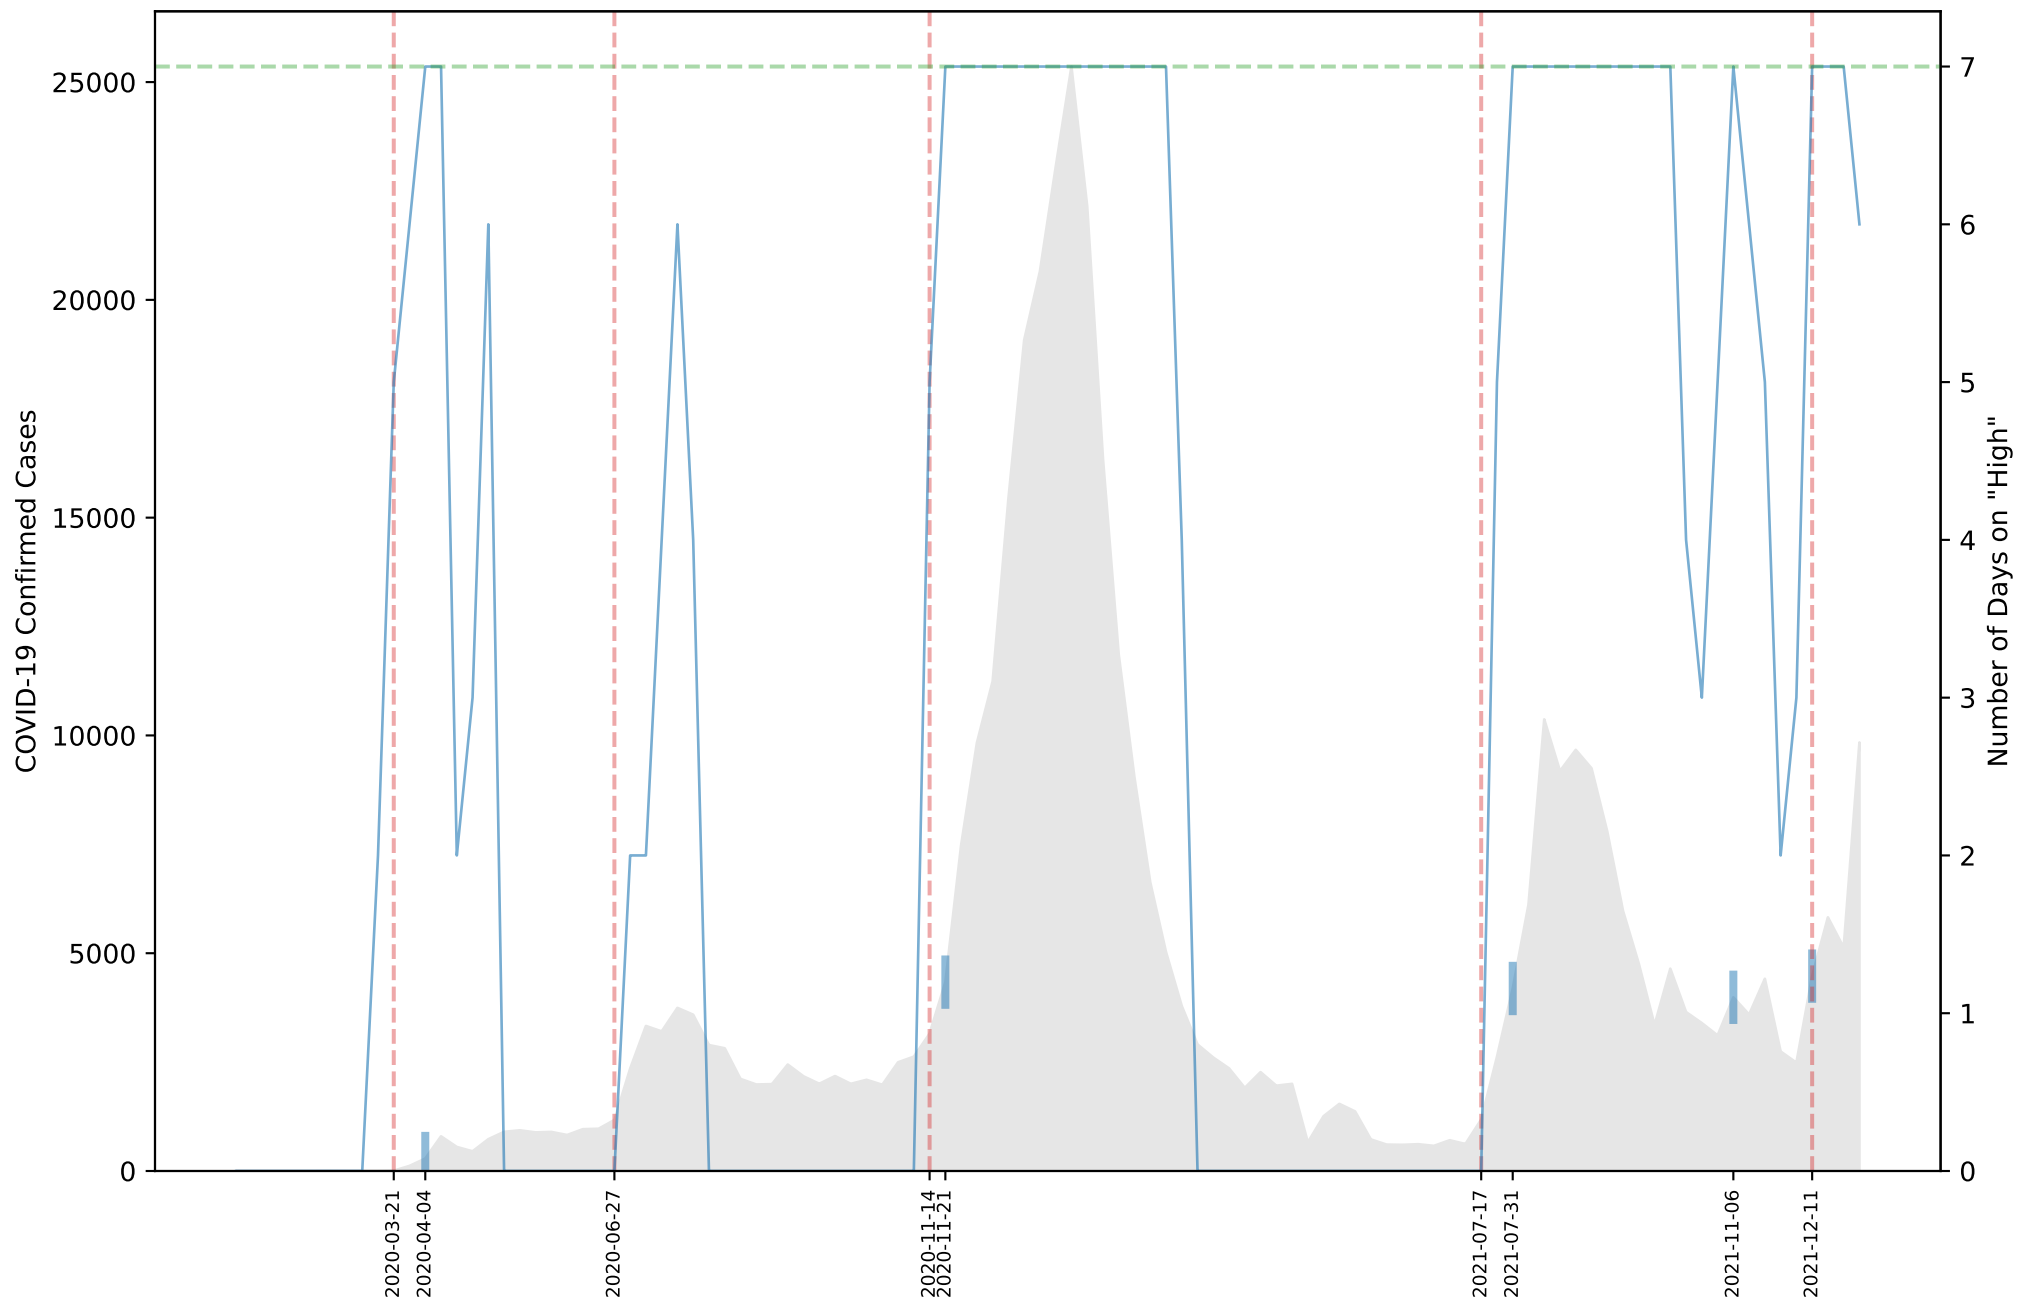

- Number of days on 'High' transmission per week
- - - Threshold to mark the beginning of epidemic event for CDC signal
- █ CDC beginning of events
- - -  $r_o$  (Parag's method)

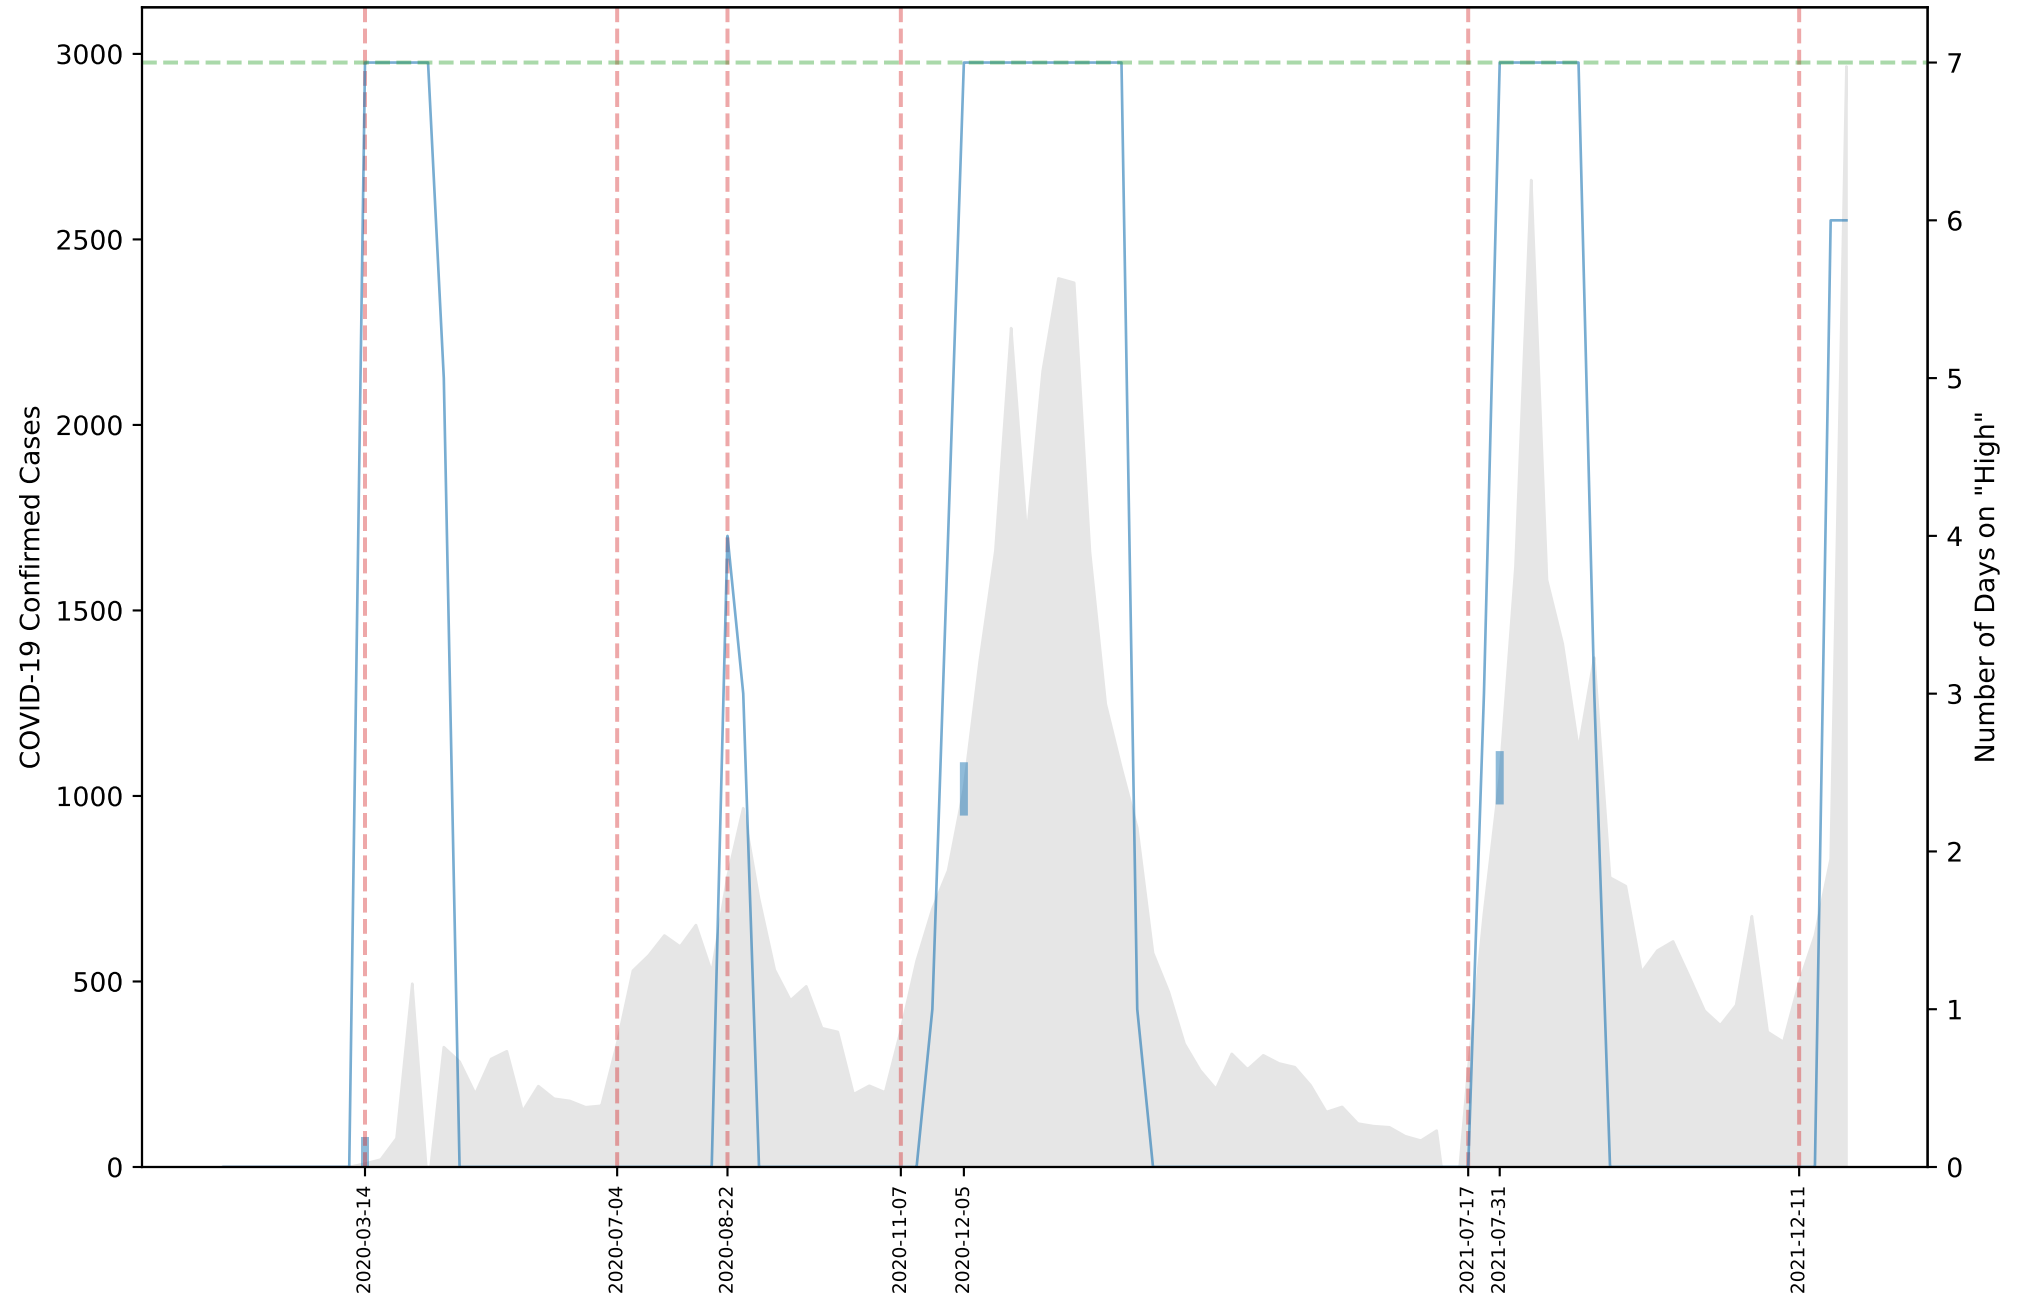

- Number of days on 'High' transmission per week
- Threshold to mark the beginning of epidemic event for CDC signal
- █ CDC beginning of events
- - -  $r_o$  (Parag's method)

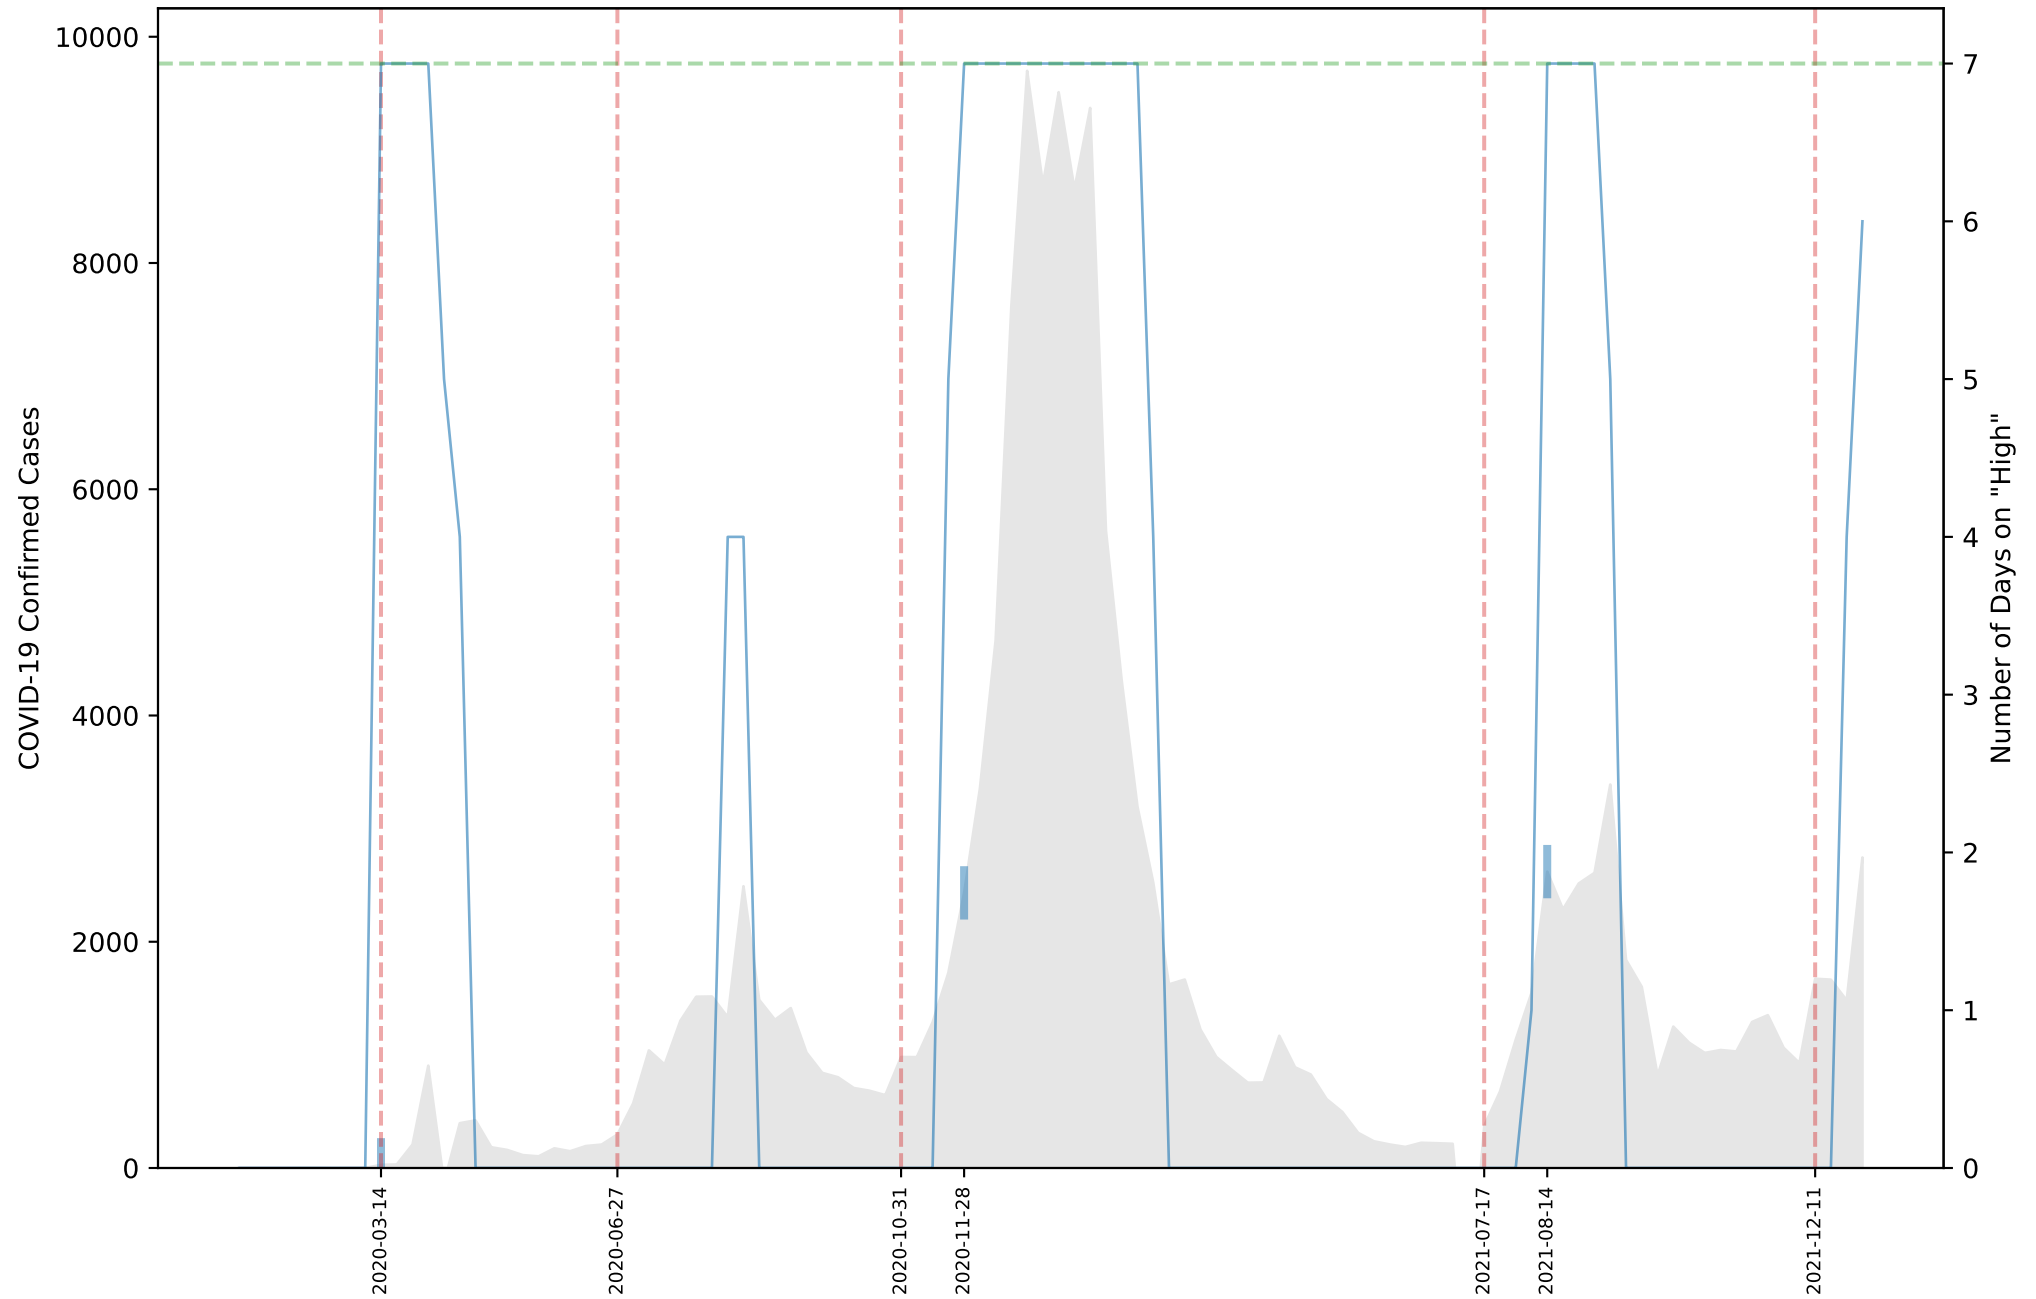

# CO, Adams

S205

- Number of days on 'High' transmission per week
- - - Threshold to mark the beginning of epidemic event for CDC signal
- █ CDC beginning of events
- - -  $r_o$  (Parag's method)

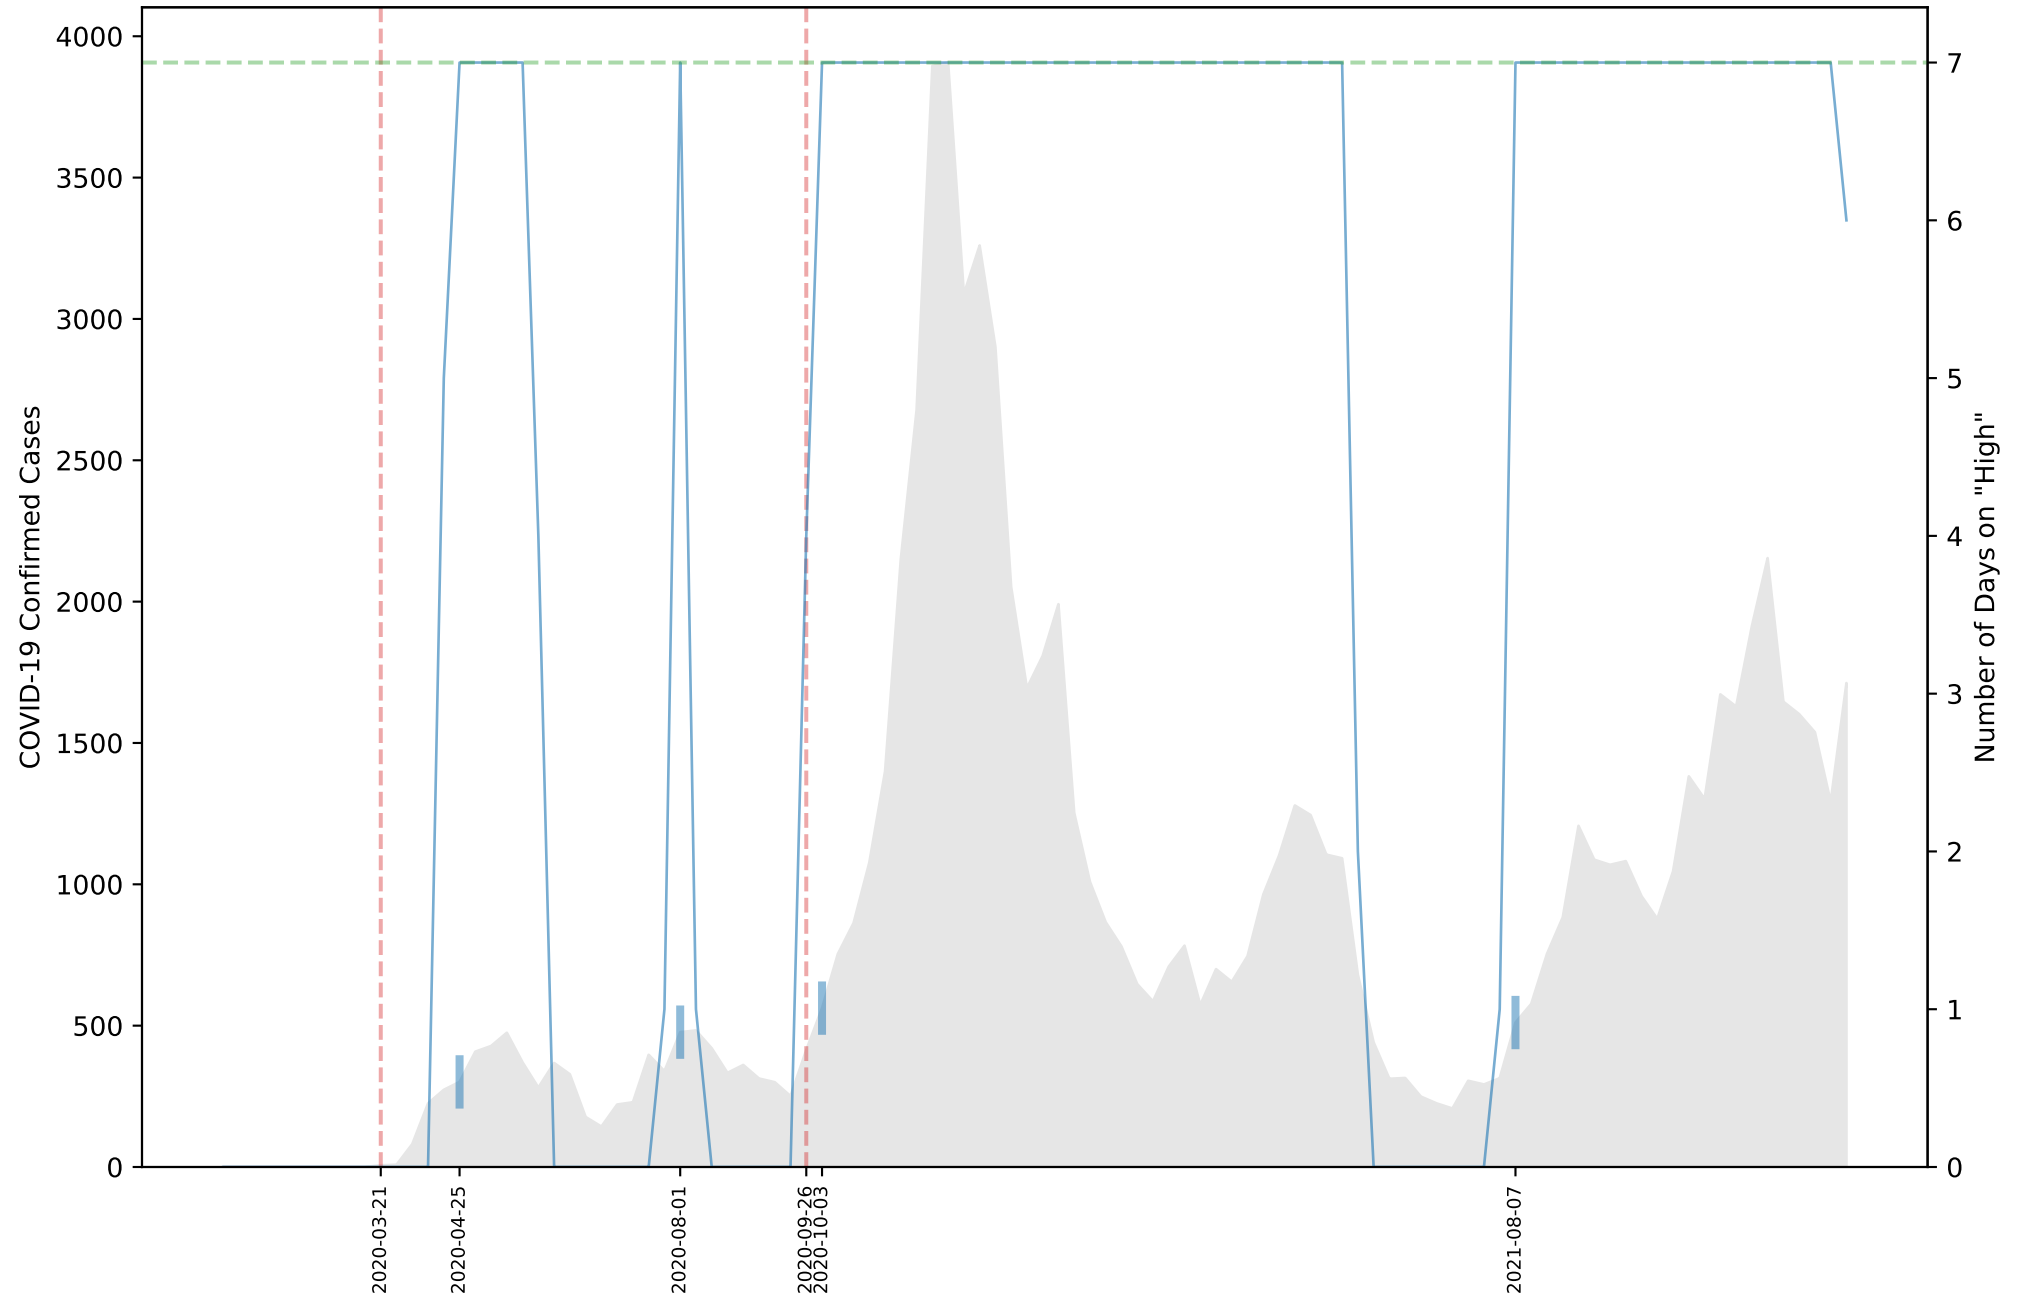

# CO, Arapahoe

S206

- Number of days on 'High' transmission per week
- - - Threshold to mark the beginning of epidemic event for CDC signal
- █ CDC beginning of events
- - -  $r_o$  (Parag's method)

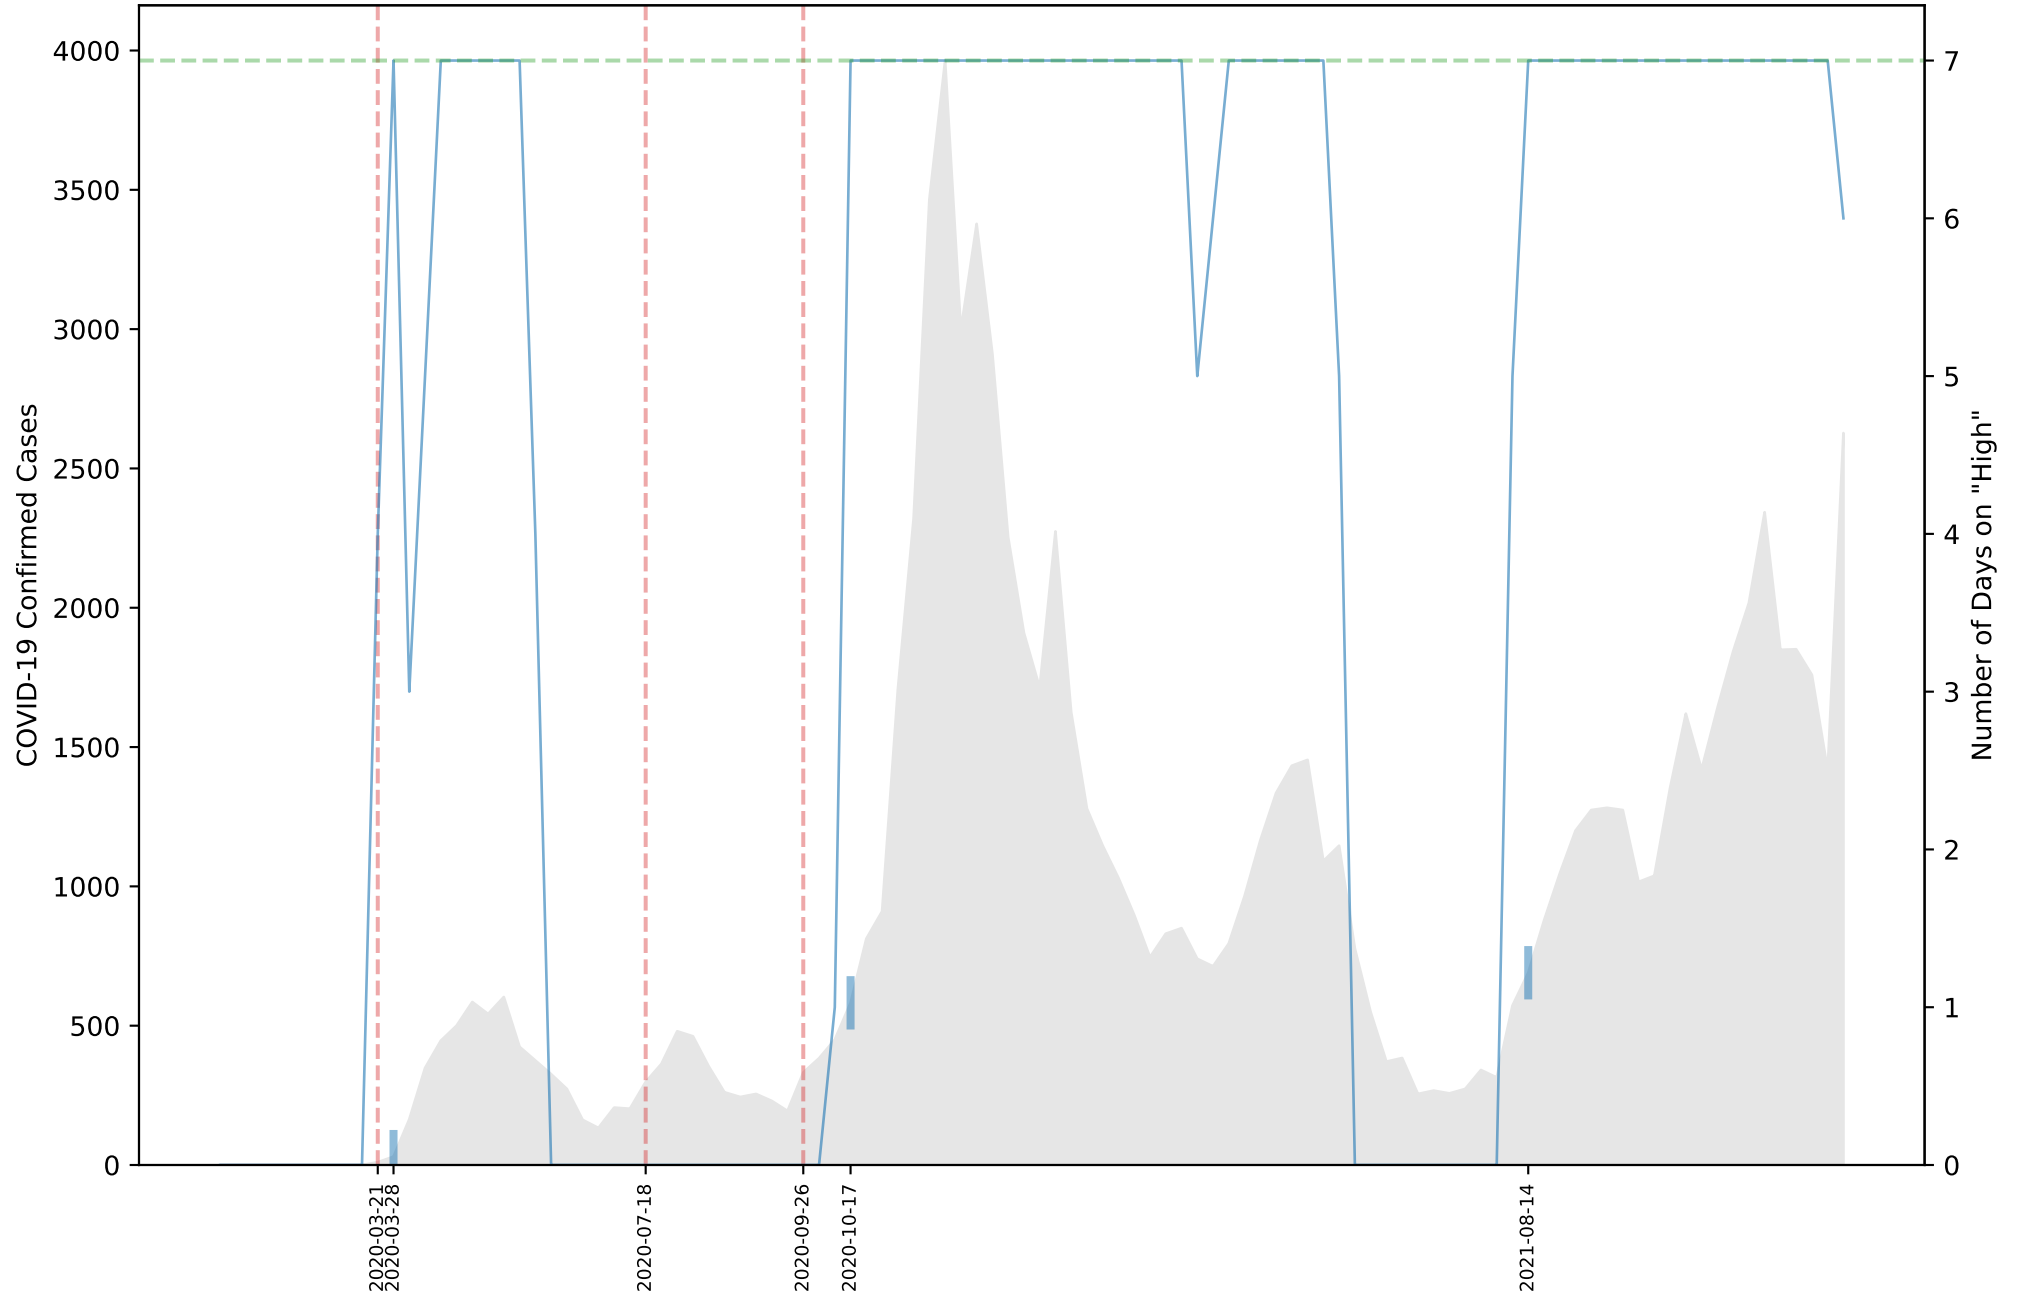



# CO, Denver

S207

- Number of days on 'High' transmission per week
- - - Threshold to mark the beginning of epidemic event for CDC signal
- █ CDC beginning of events
- - -  $r_o$  (Parag's method)

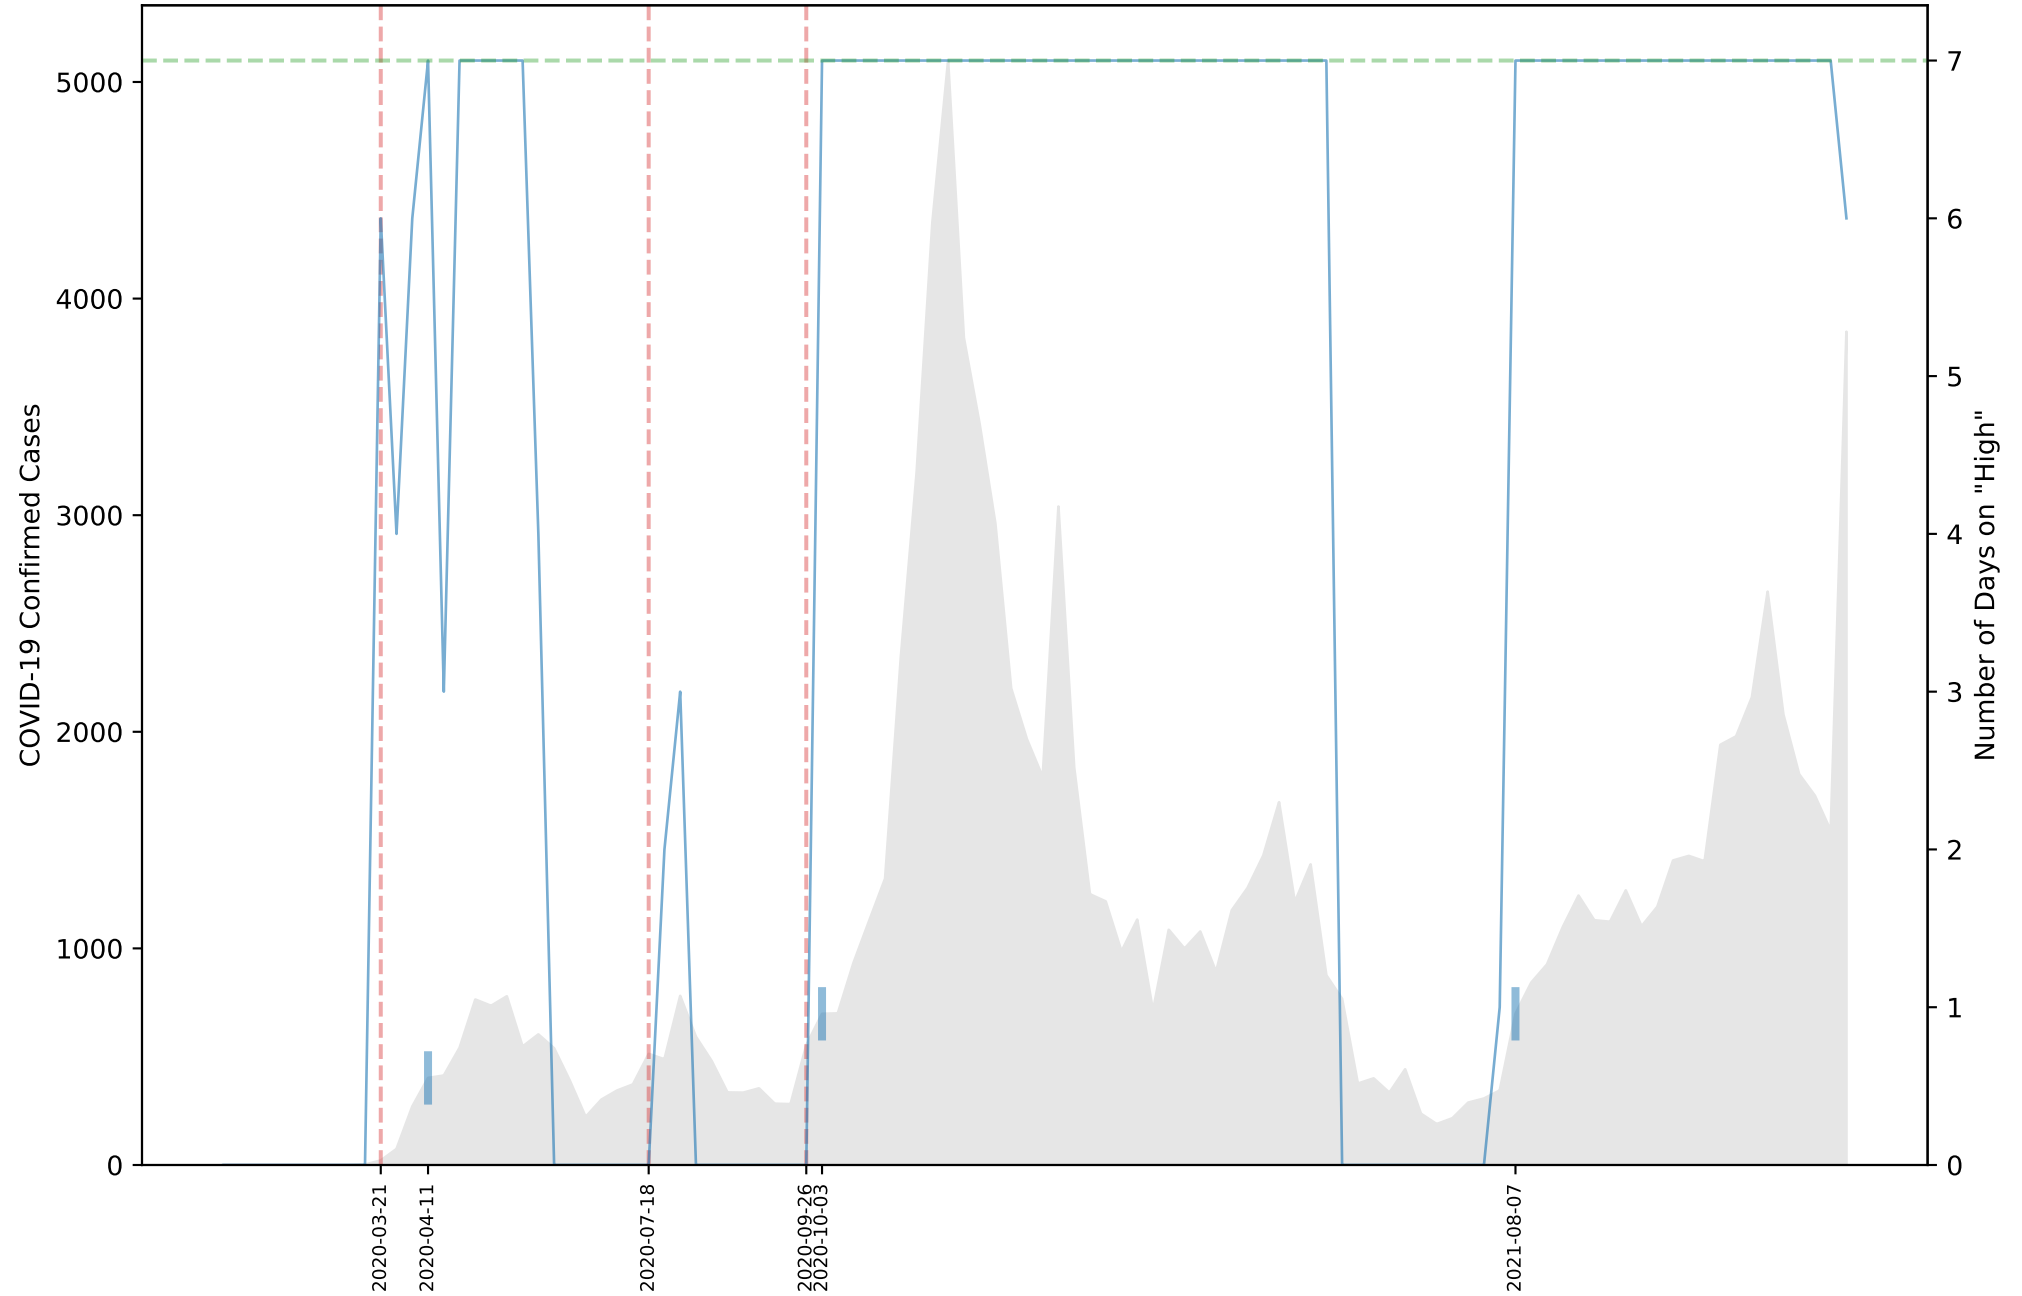

- Number of days on 'High' transmission per week
- - - Threshold to mark the beginning of epidemic event for CDC signal
- █ CDC beginning of events
- - -  $r_o$  (Parag's method)

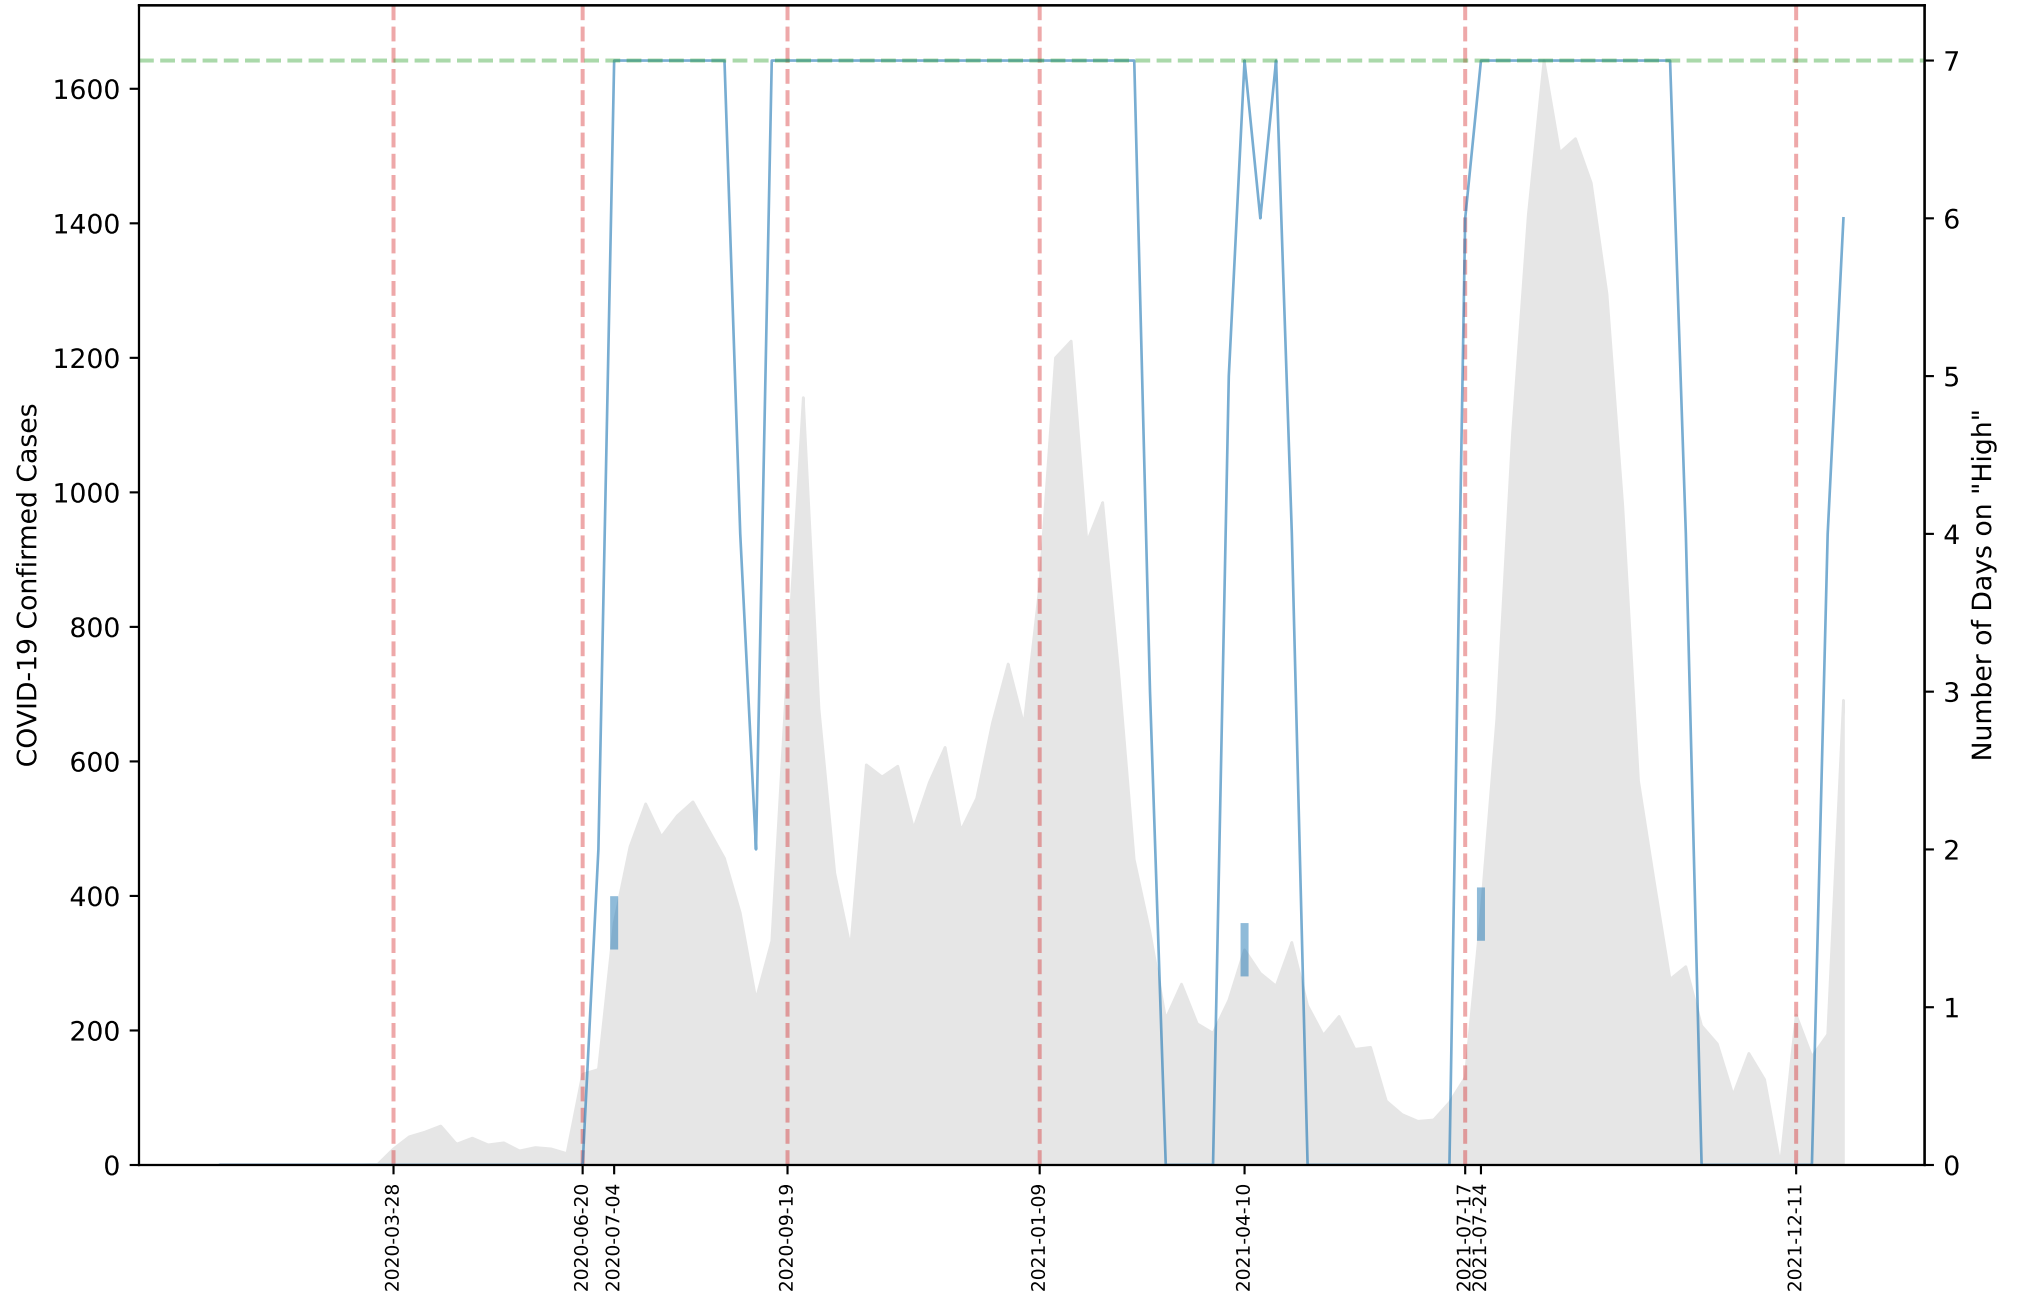

- Number of days on 'High' transmission per week
- - - Threshold to mark the beginning of epidemic event for CDC signal
- █ CDC beginning of events
- - -  $r_o$  (Parag's method)

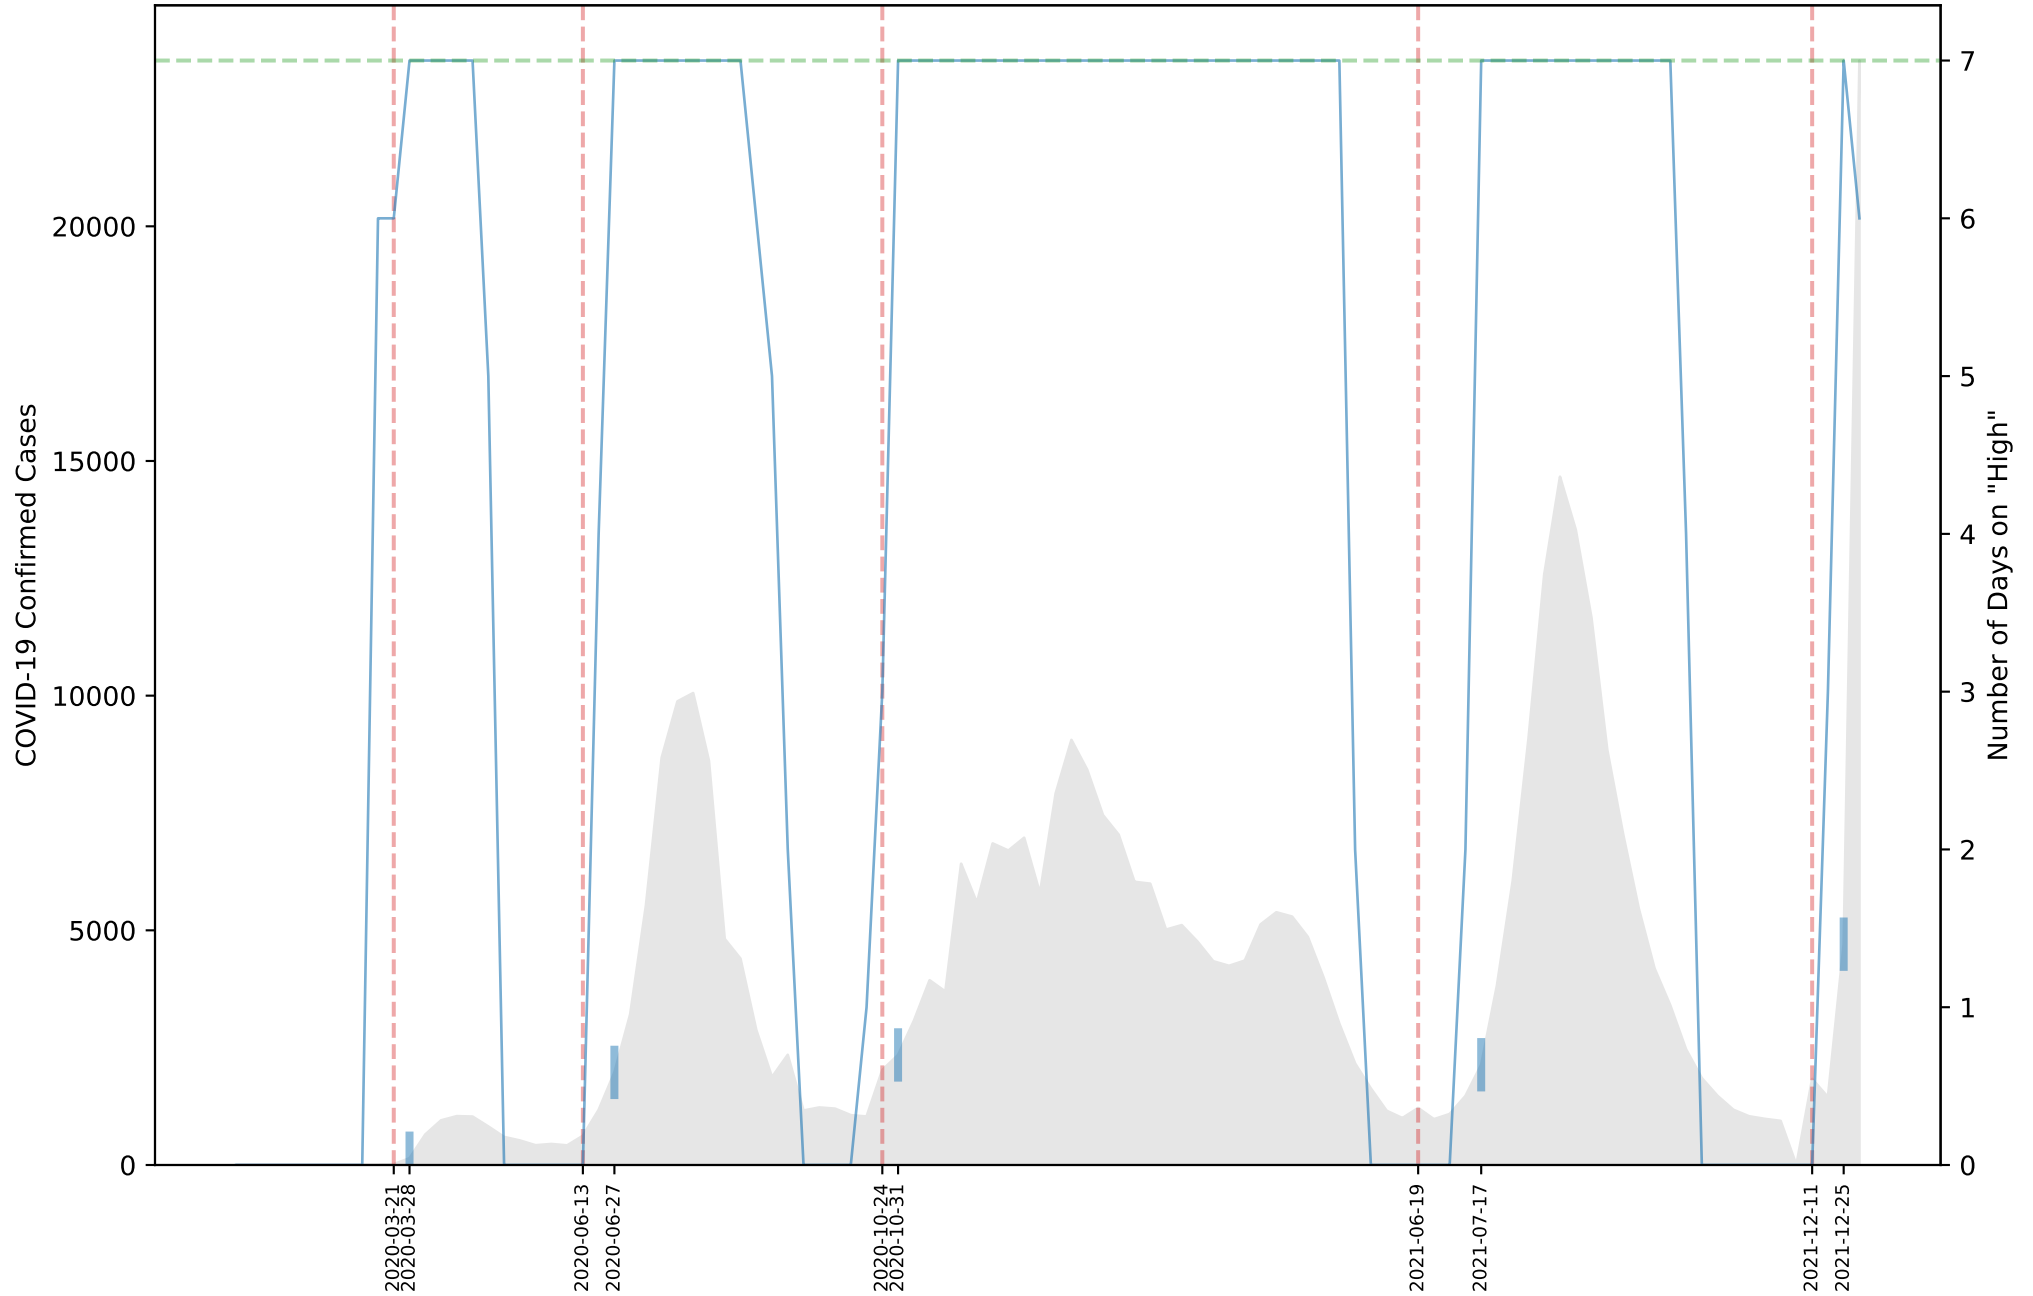

# FL, Hillsborough

S210

- Number of days on 'High' transmission per week
- - - Threshold to mark the beginning of epidemic event for CDC signal
- █ CDC beginning of events
- - -  $r_o$  (Parag's method)

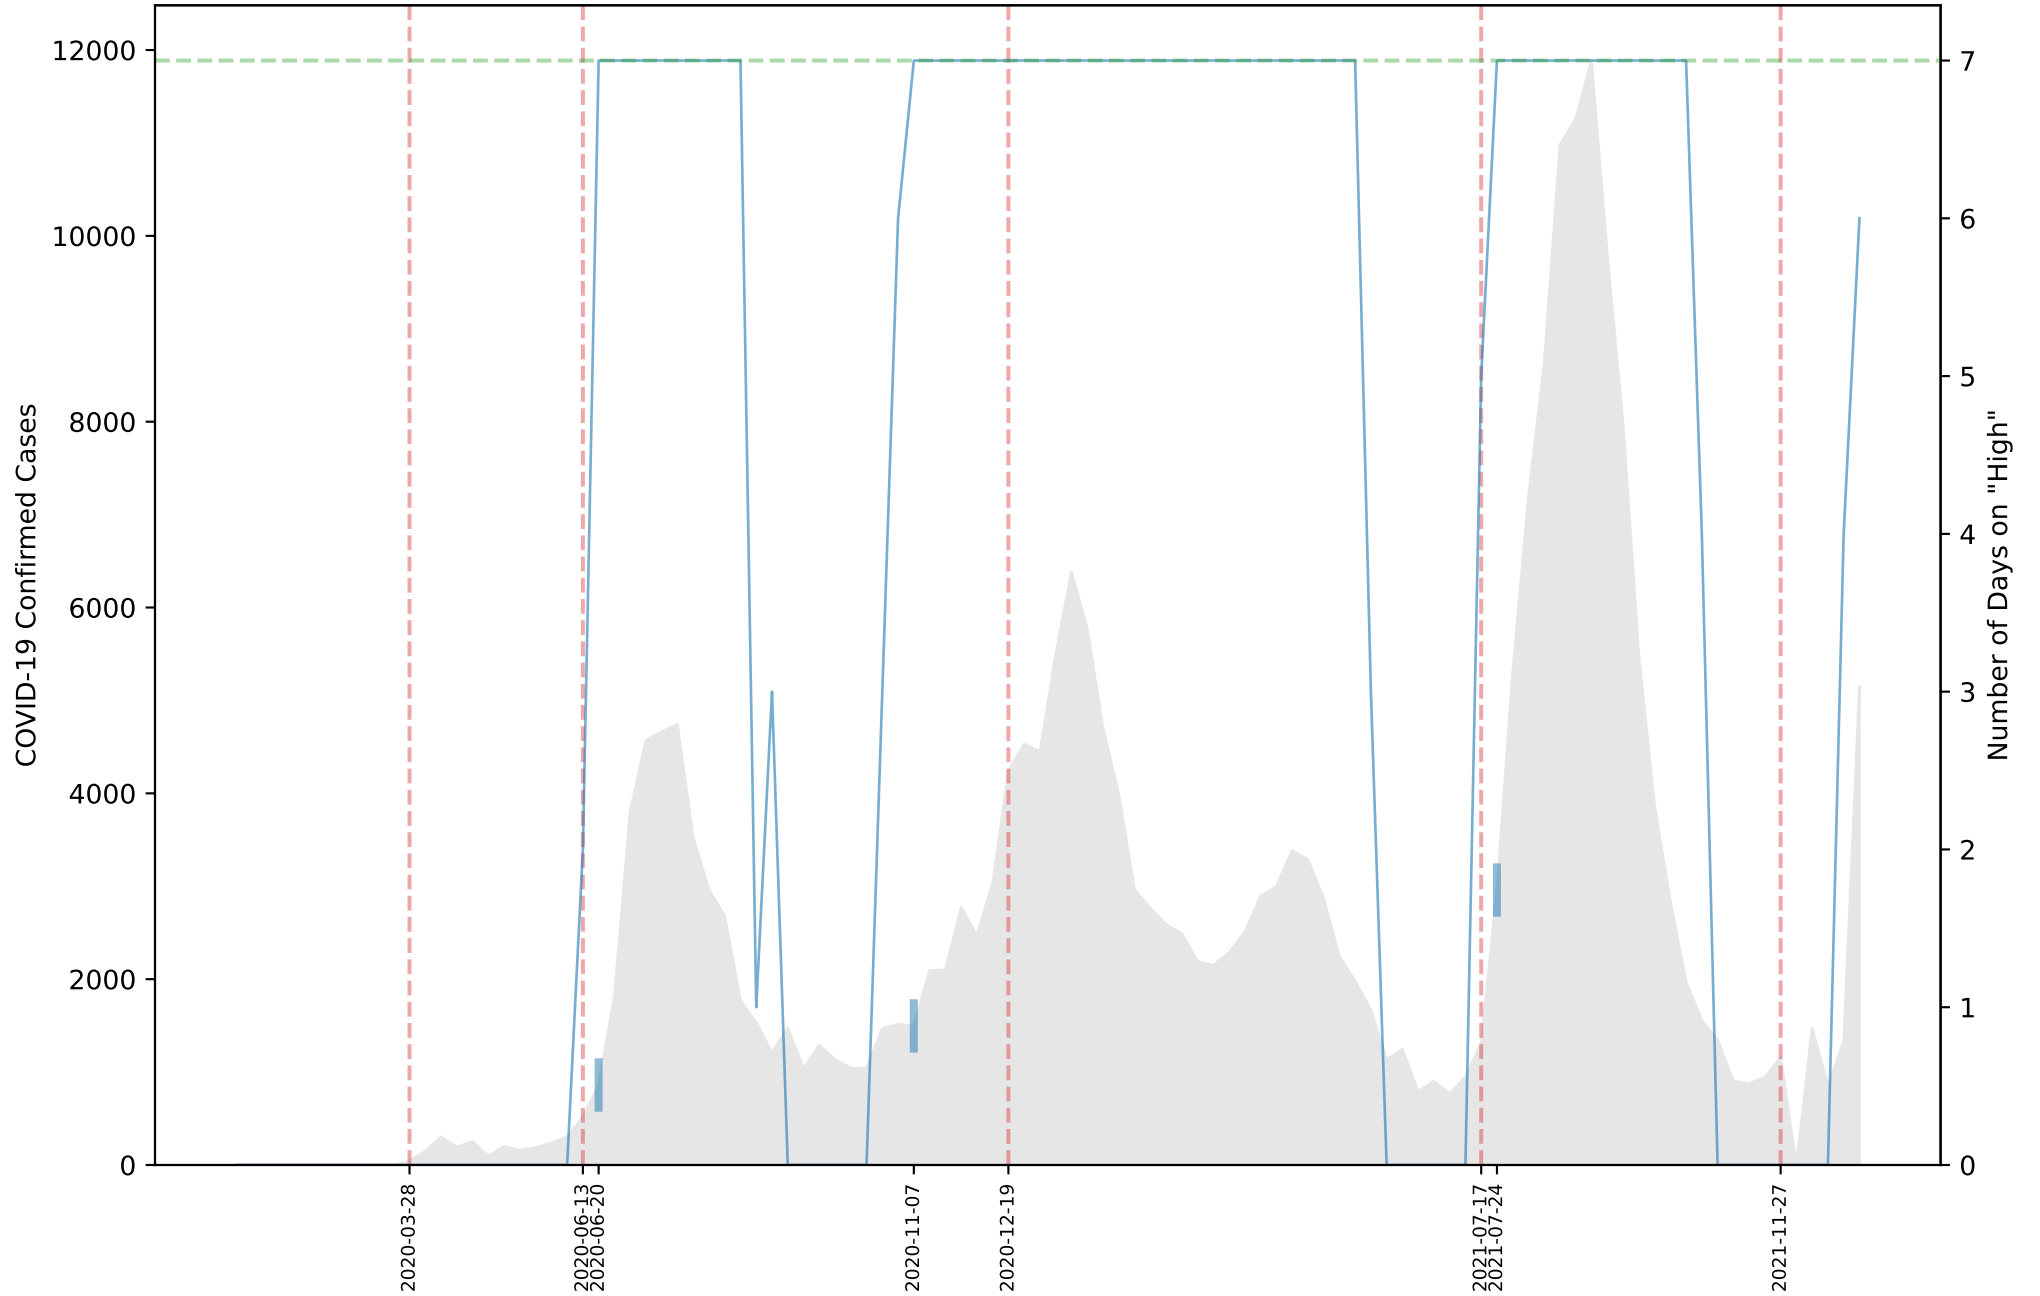

- Number of days on 'High' transmission per week
- - - Threshold to mark the beginning of epidemic event for CDC signal
- █ CDC beginning of events
- - -  $r_o$  (Parag's method)

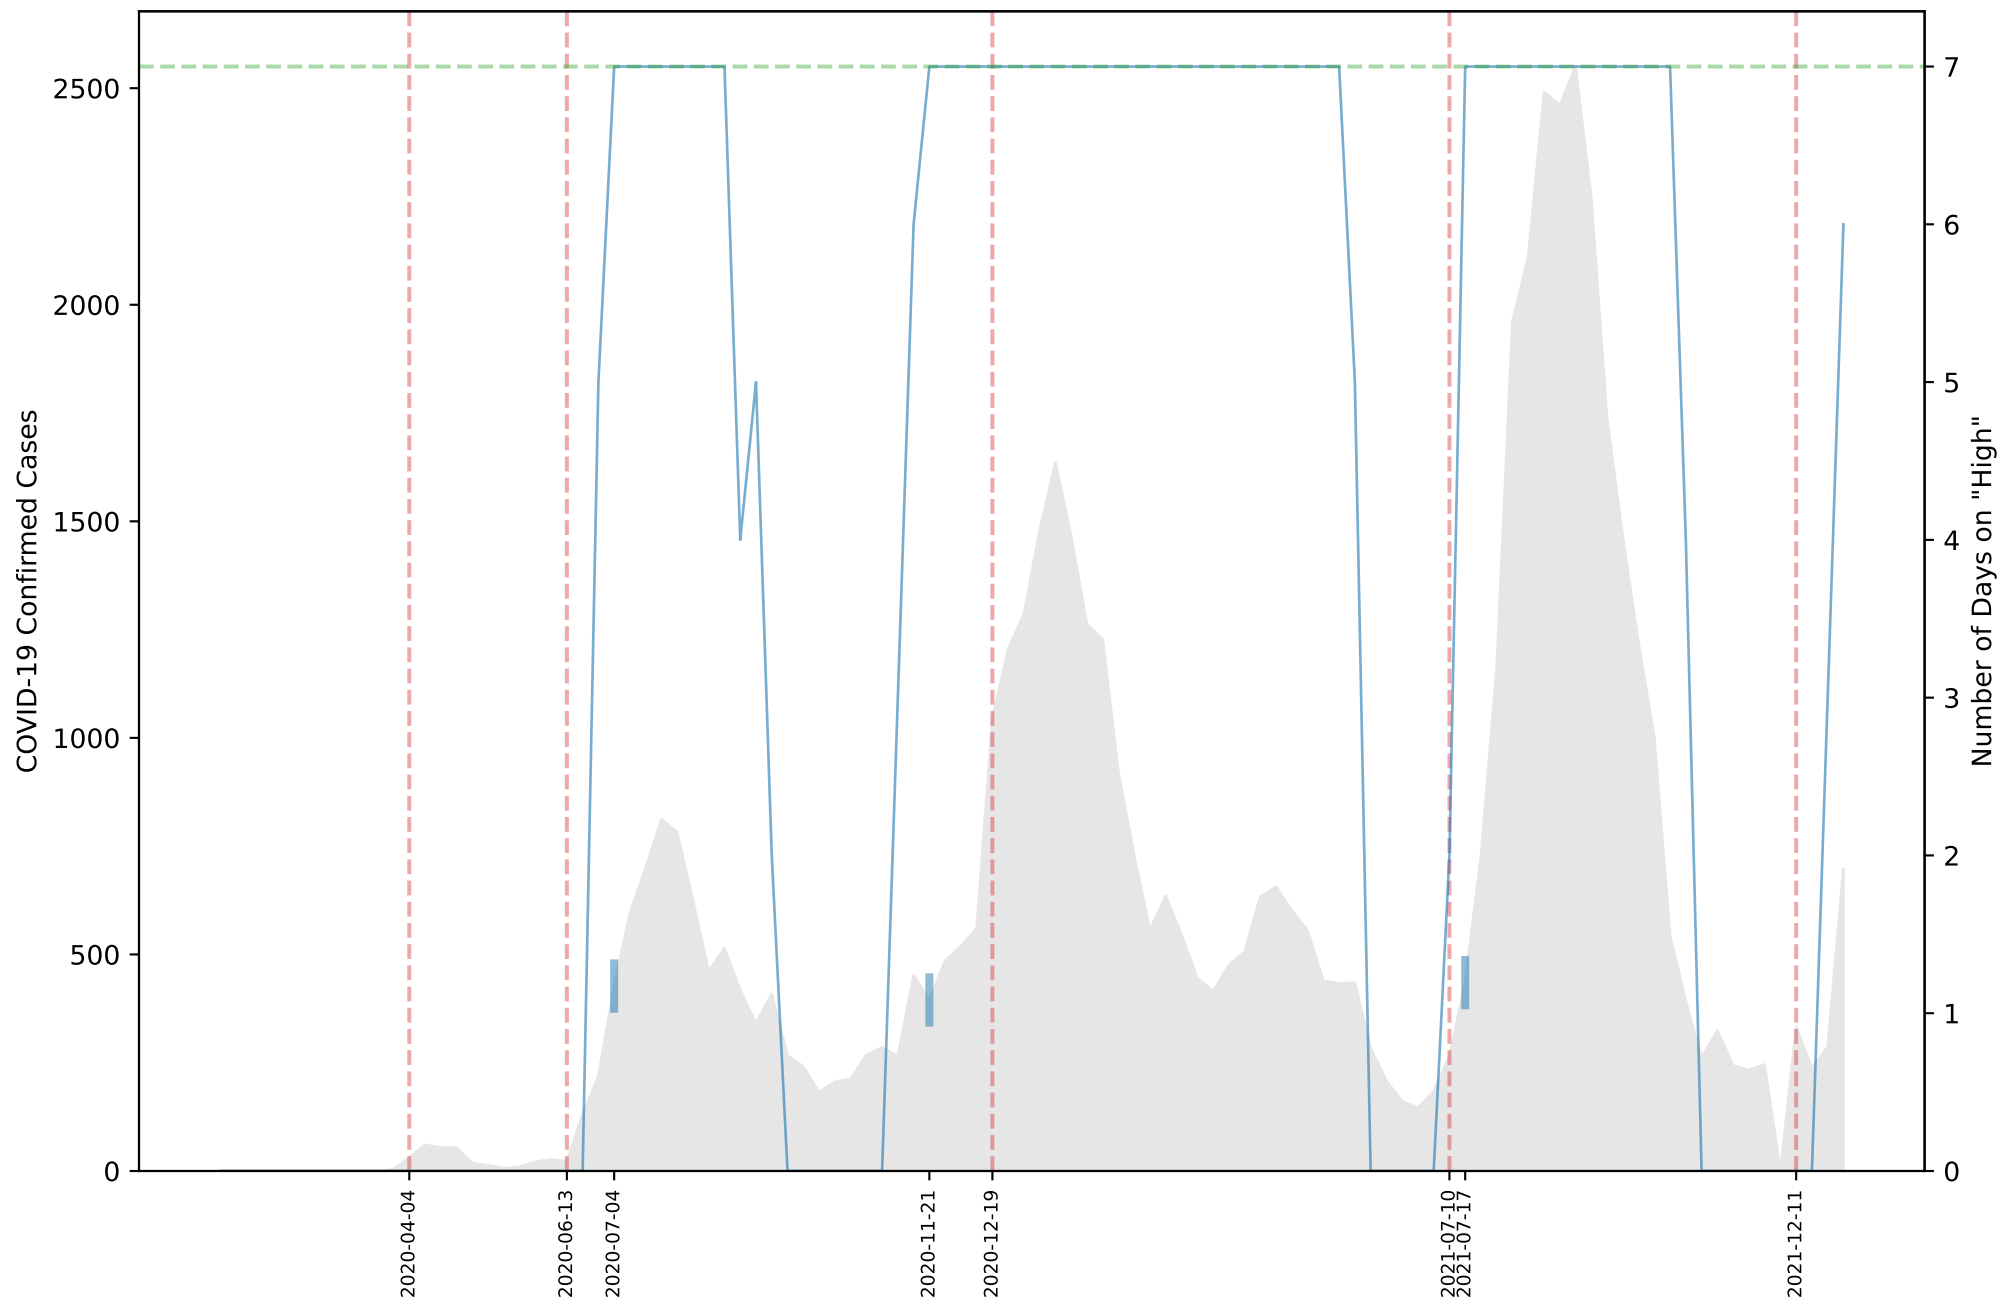

# FL, Marion

S212

- Number of days on 'High' transmission per week
- - - Threshold to mark the beginning of epidemic event for CDC signal
- CDC beginning of events
- - -  $r_o$  (Parag's method)

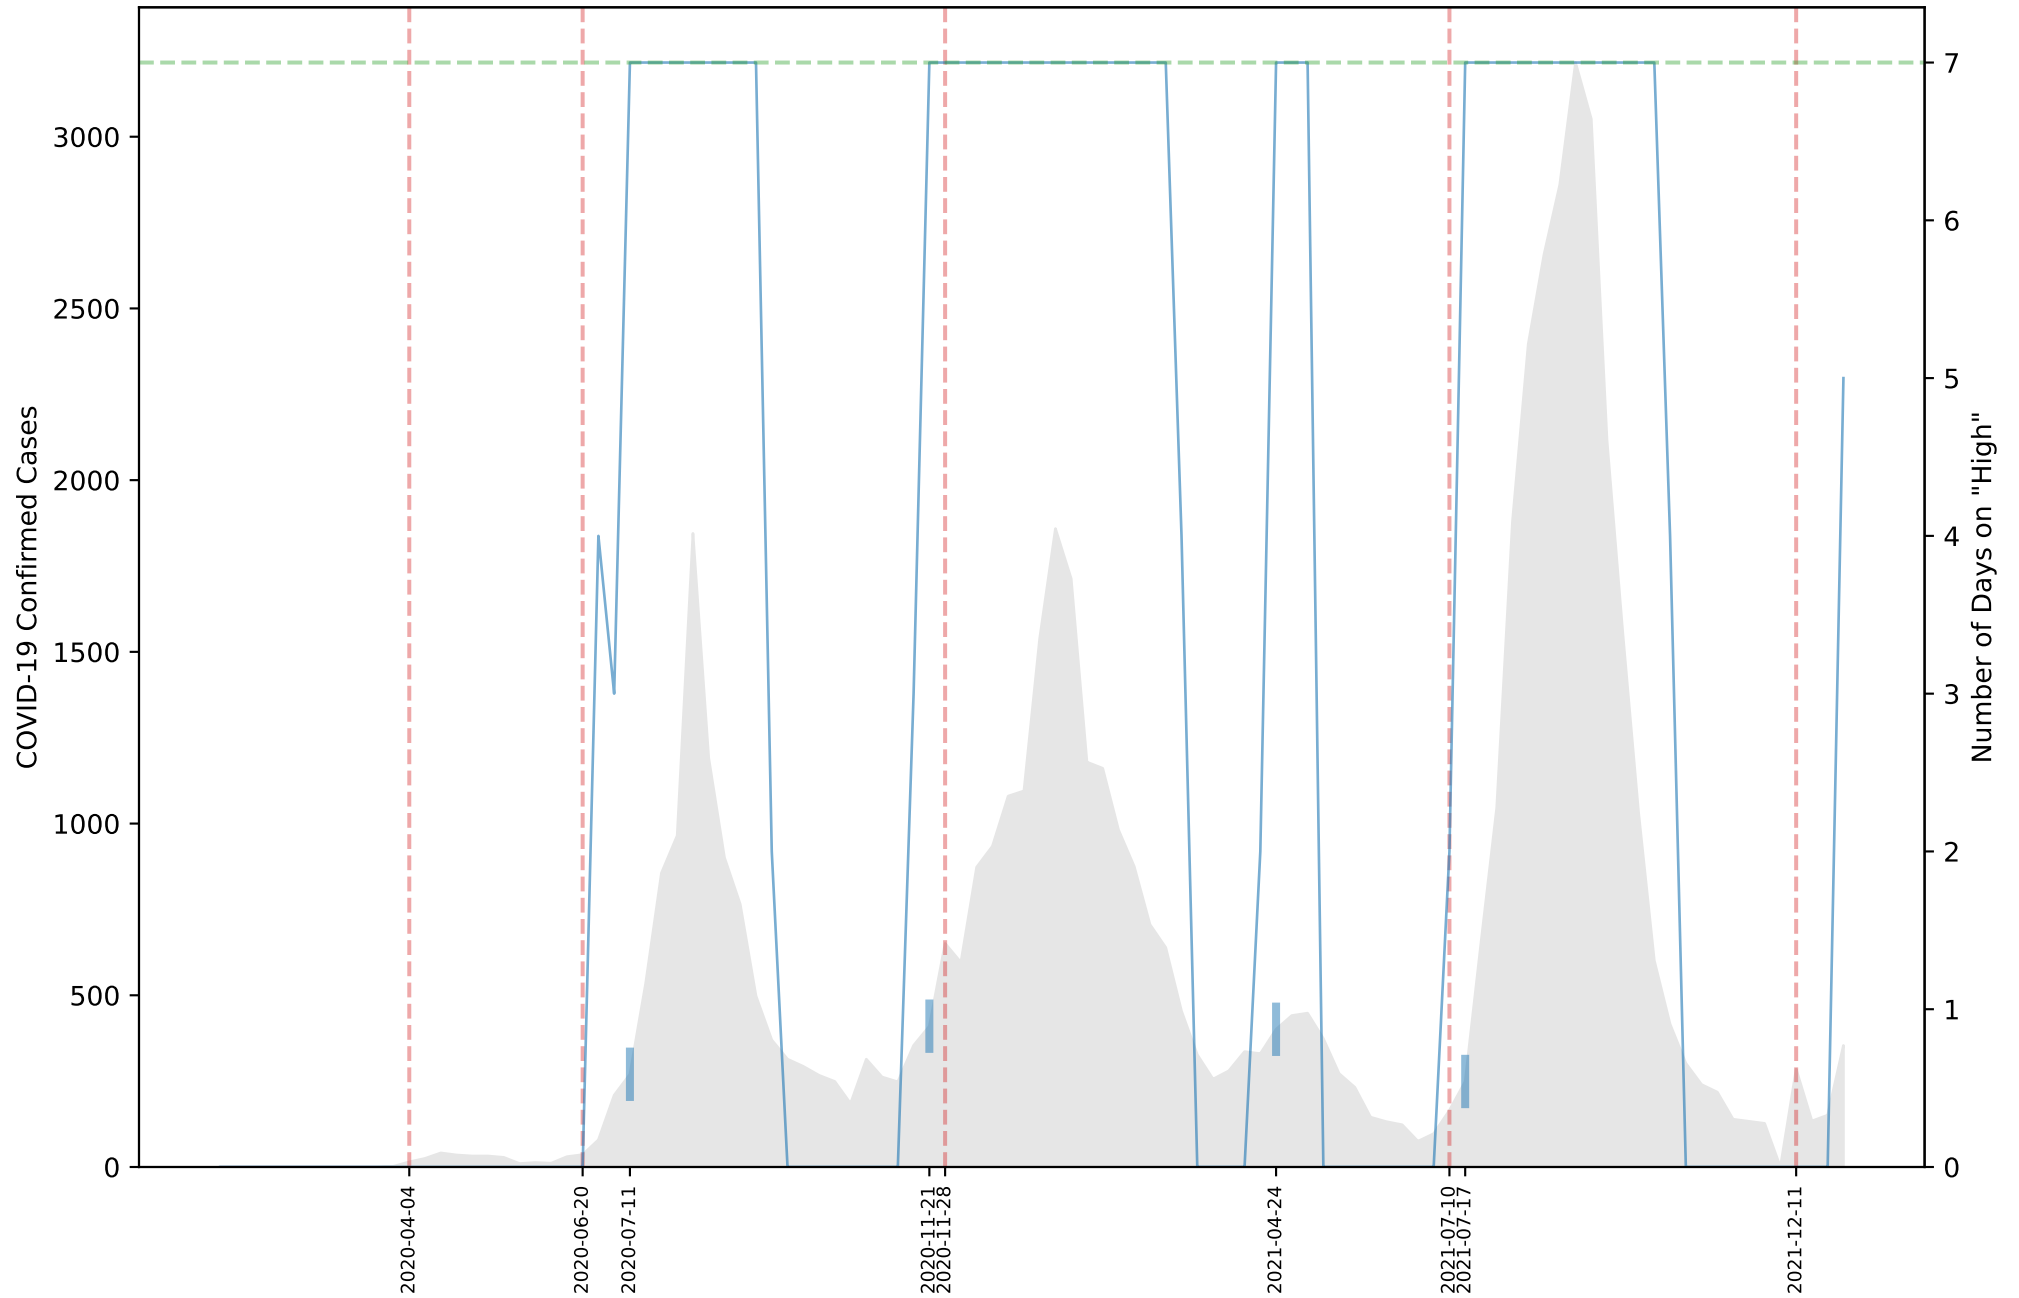

- Number of days on 'High' transmission per week
- - - Threshold to mark the beginning of epidemic event for CDC signal
- █ CDC beginning of events
- - -  $r_o$  (Parag's method)

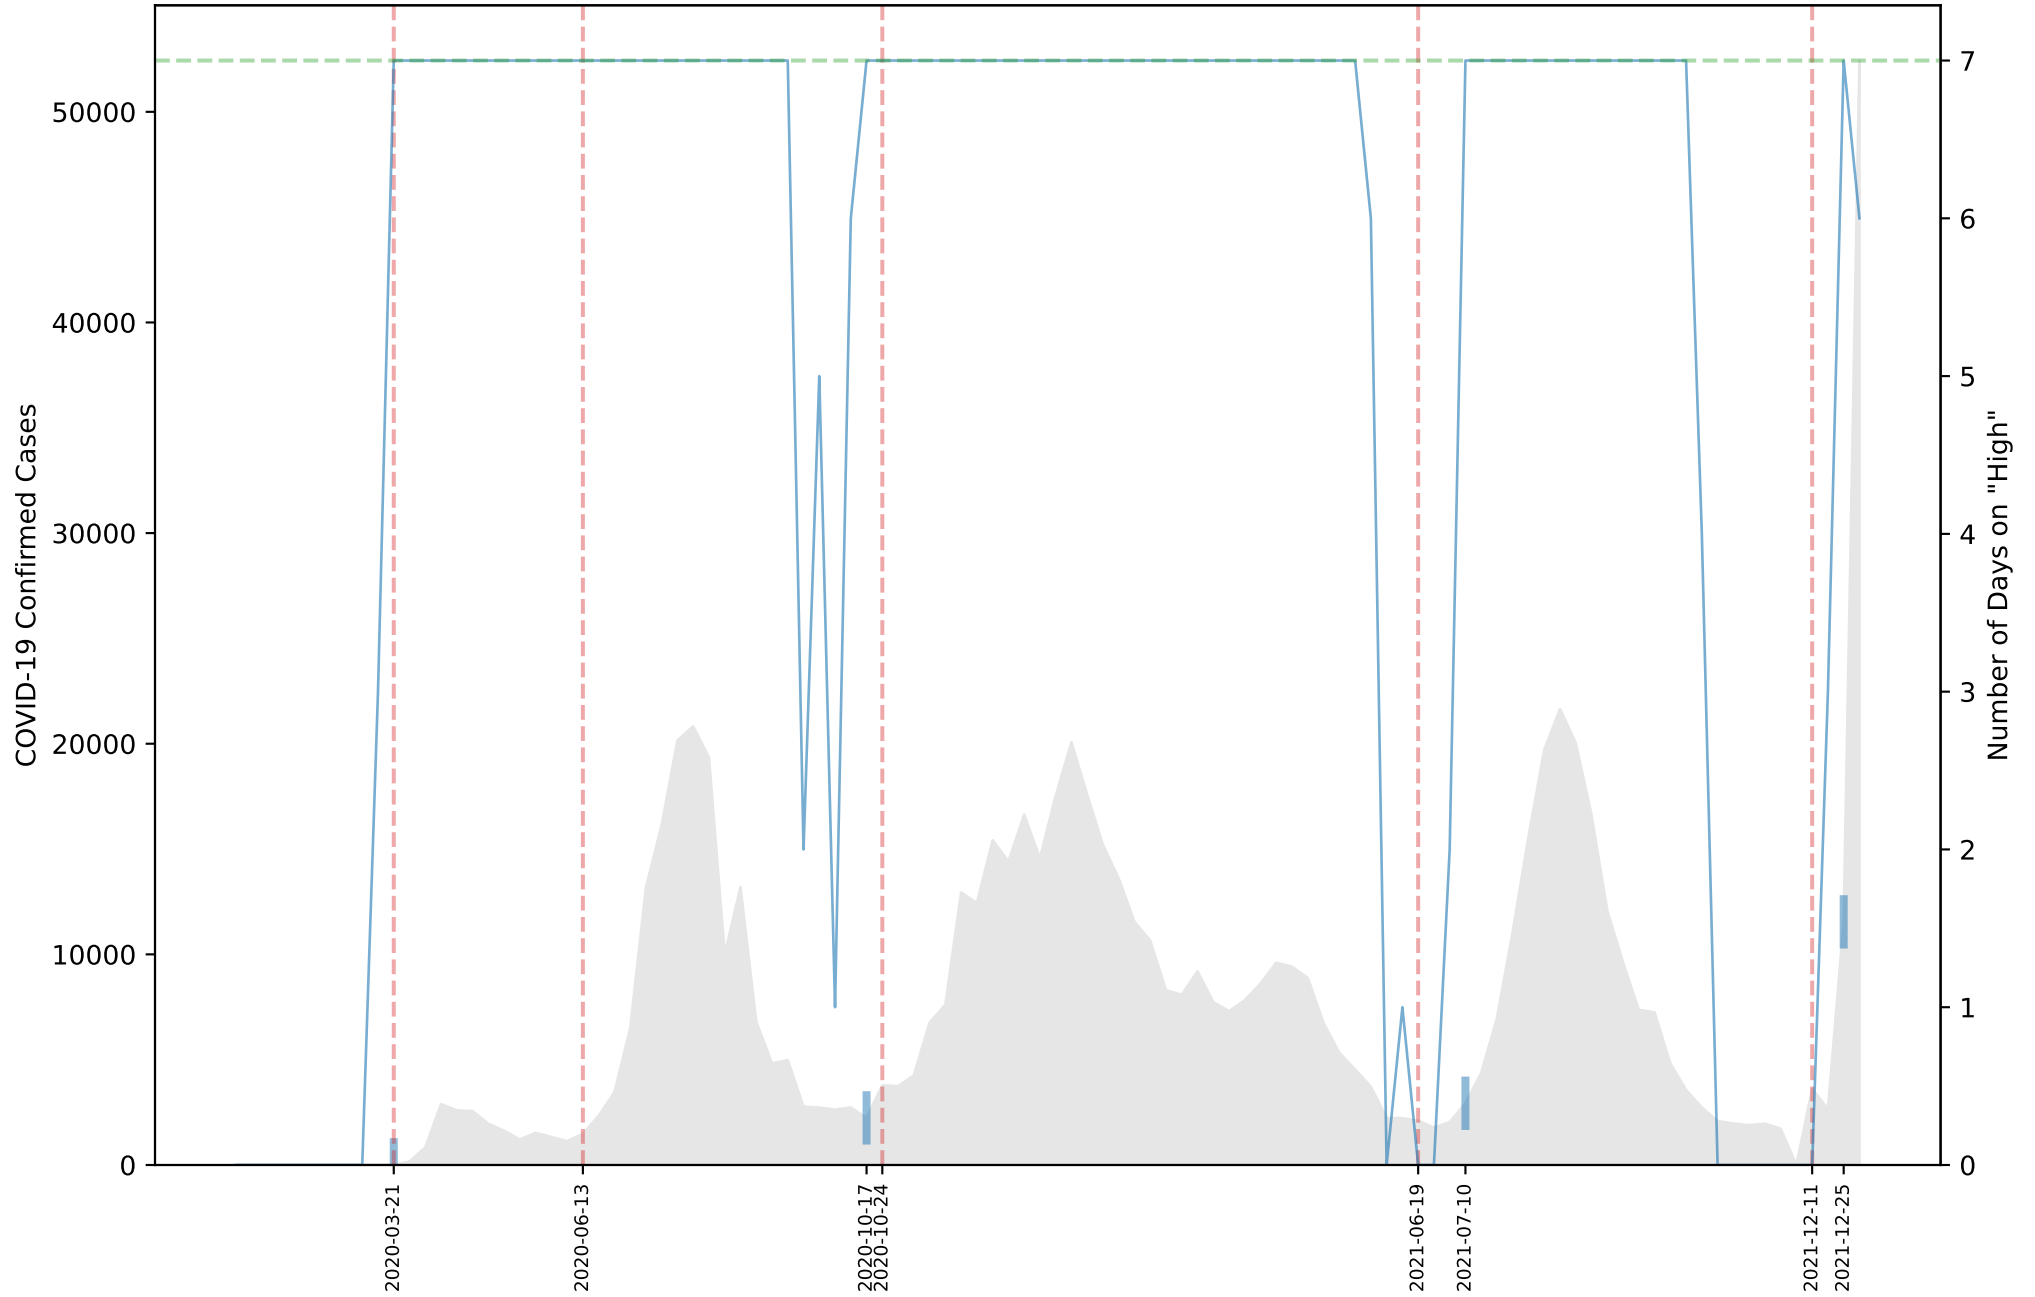

# FL, Orange

S214

- Number of days on 'High' transmission per week
- Threshold to mark the beginning of epidemic event for CDC signal
- CDC beginning of events
- $r_o$  (Parag's method)

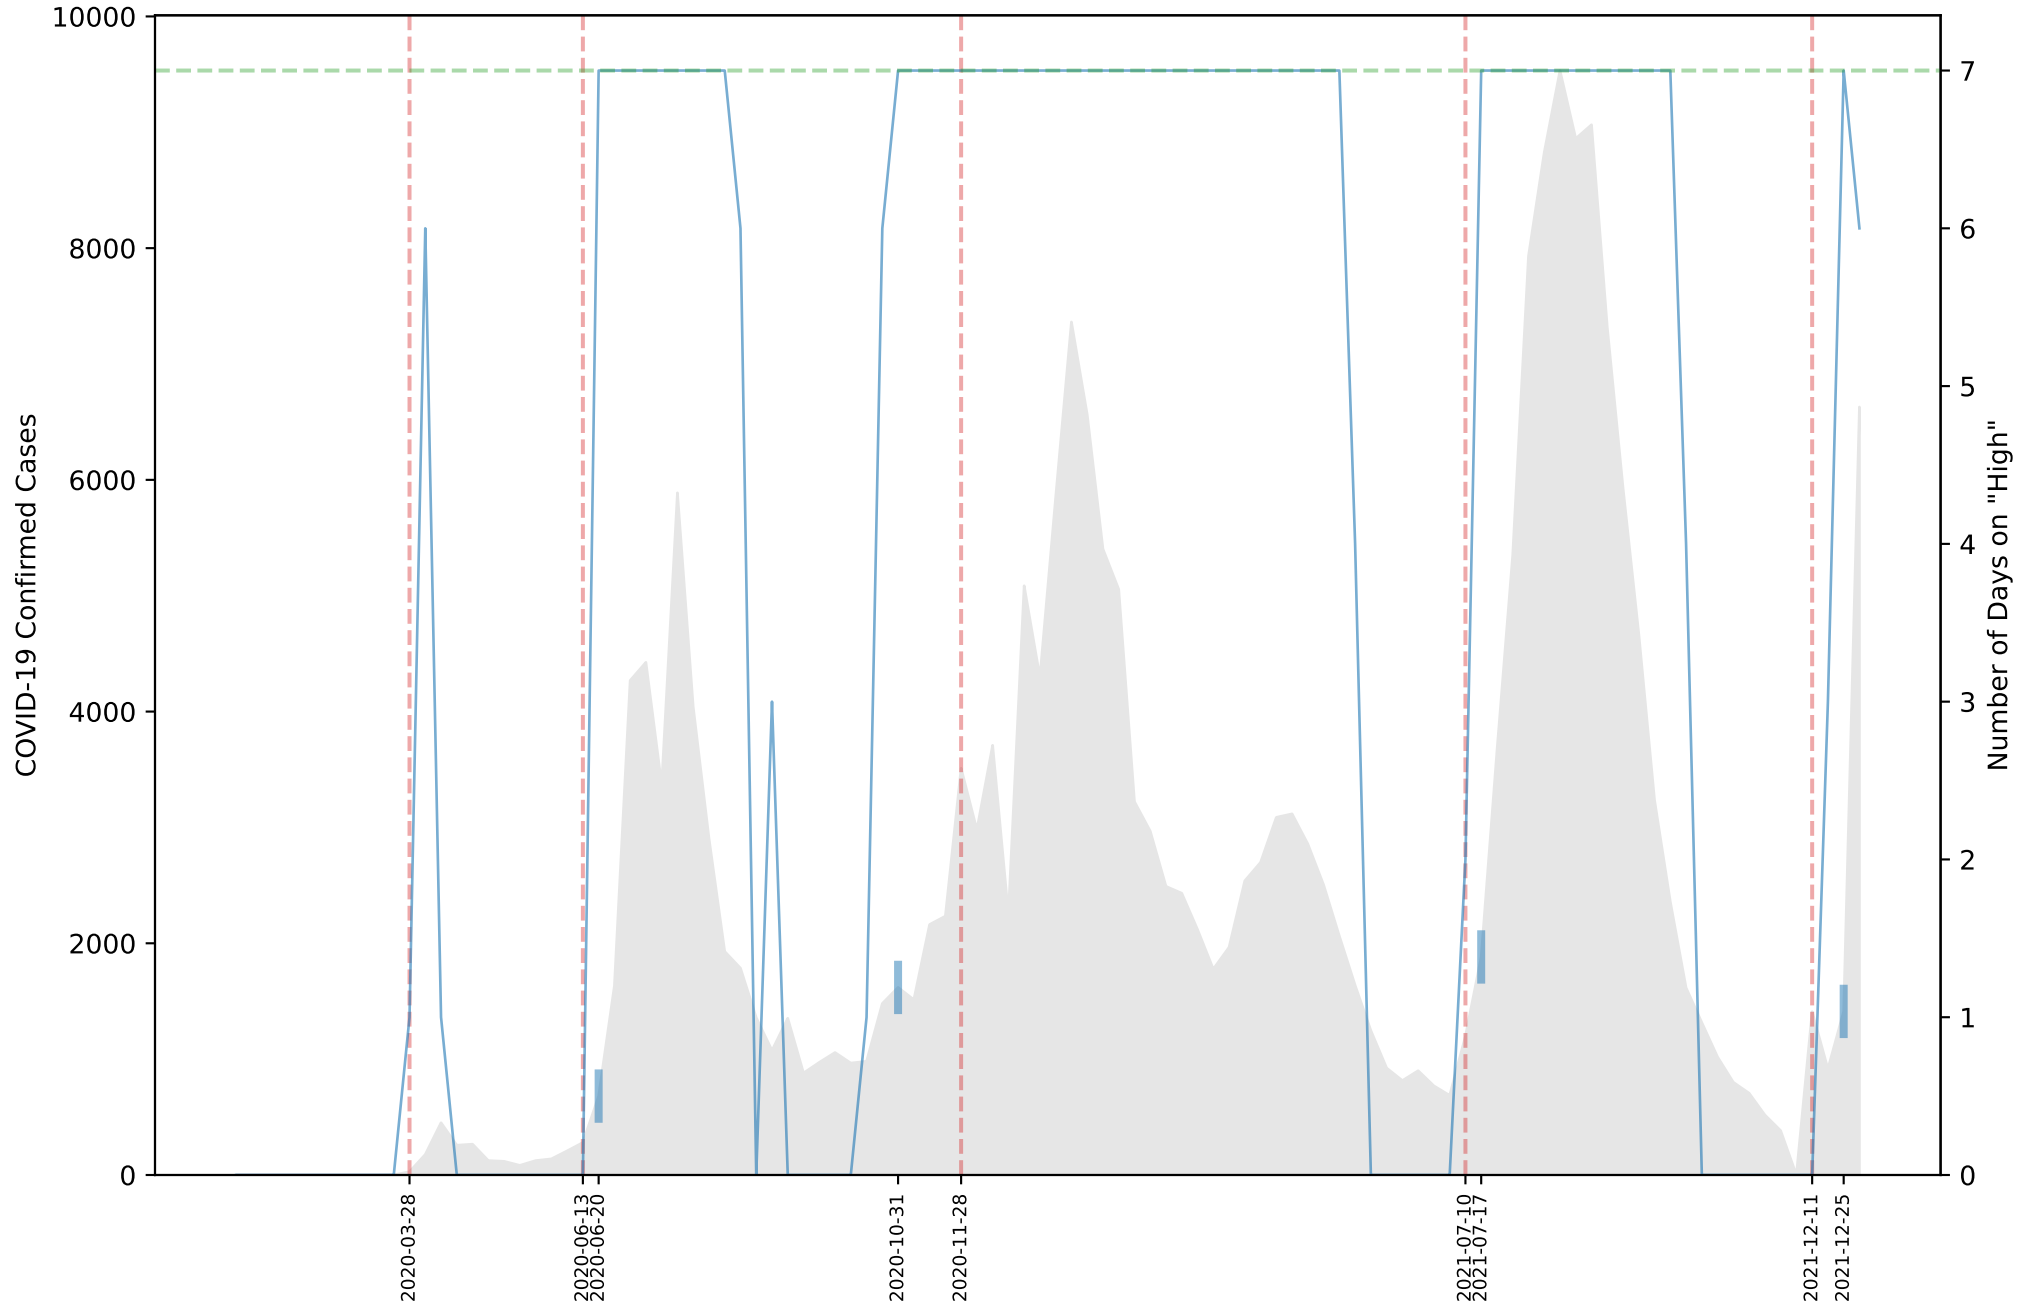



# FL, Palm Beach

S215

- Number of days on 'High' transmission per week
- - - Threshold to mark the beginning of epidemic event for CDC signal
- █ CDC beginning of events
- - -  $r_o$  (Parag's method)

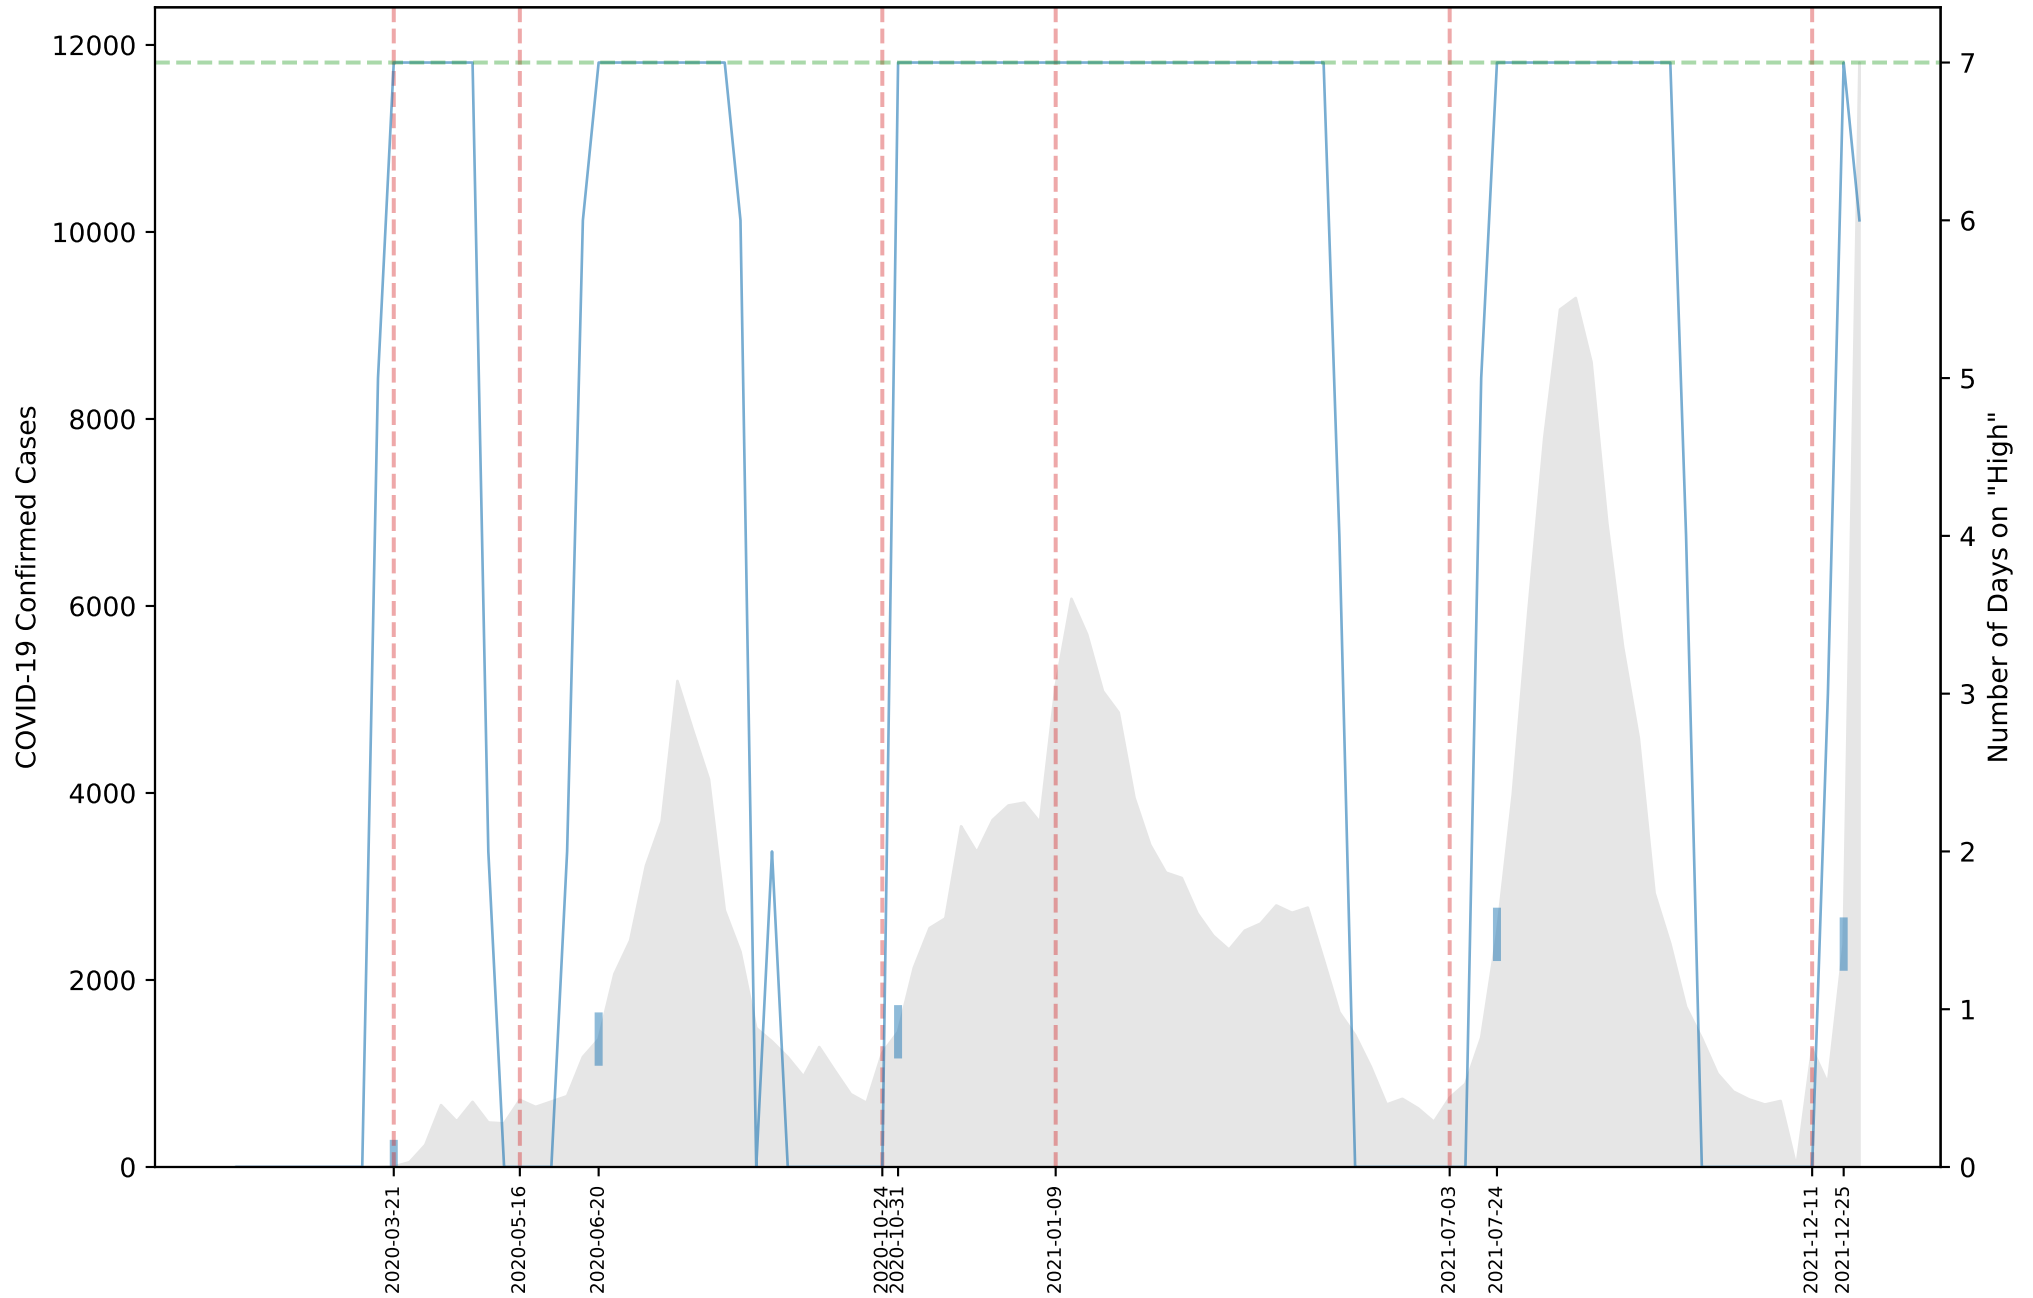

- Number of days on 'High' transmission per week
- - - Threshold to mark the beginning of epidemic event for CDC signal
- █ CDC beginning of events
- - -  $r_o$  (Parag's method)

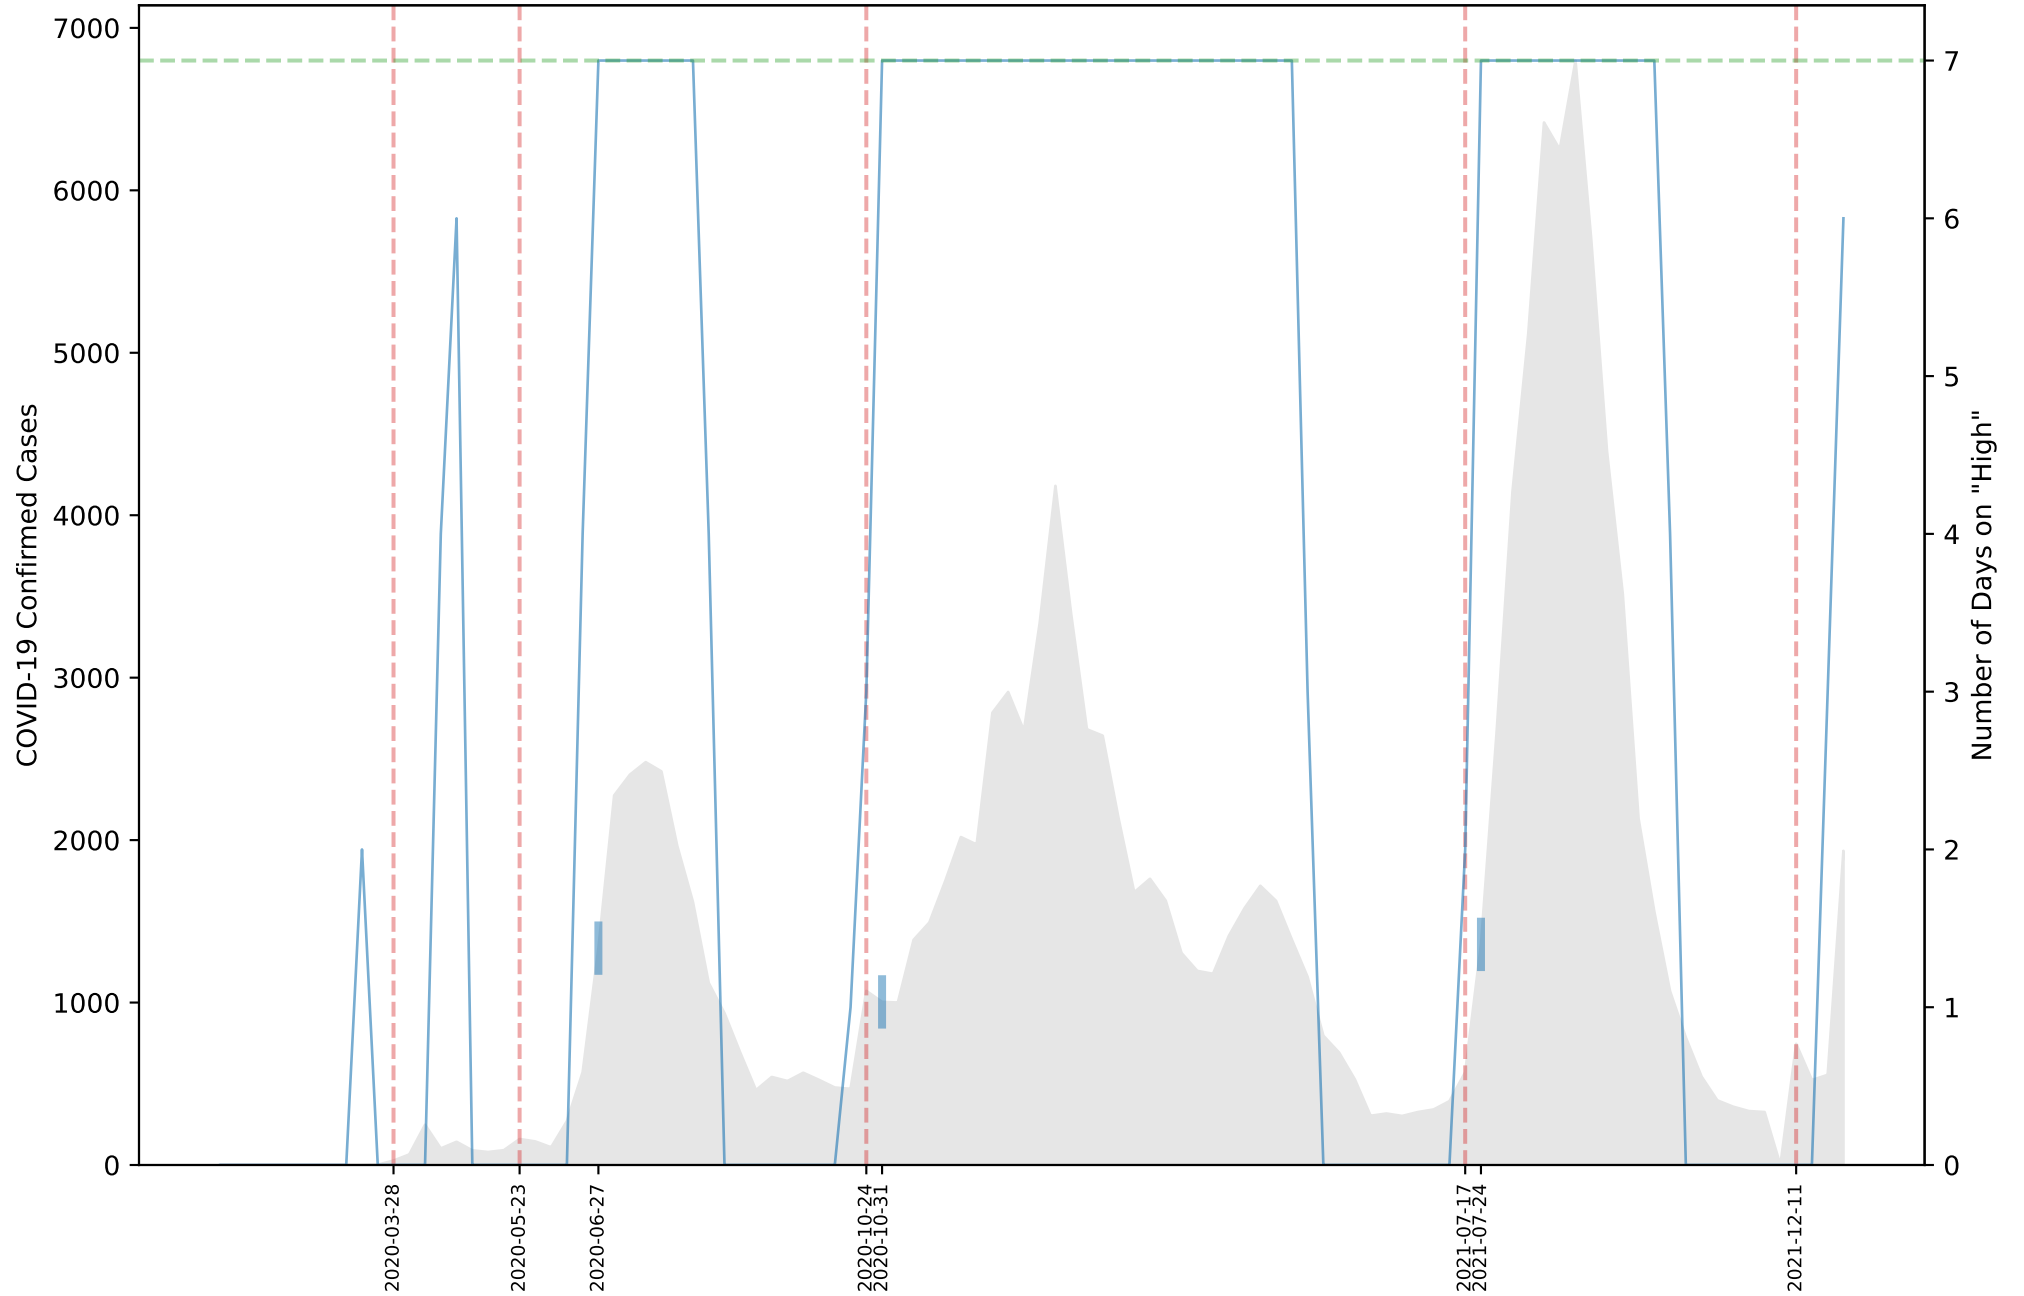

# FL, Sumter

S217

- Number of days on 'High' transmission per week
- - - Threshold to mark the beginning of epidemic event for CDC signal
- █ CDC beginning of events
- - -  $r_o$  (Parag's method)

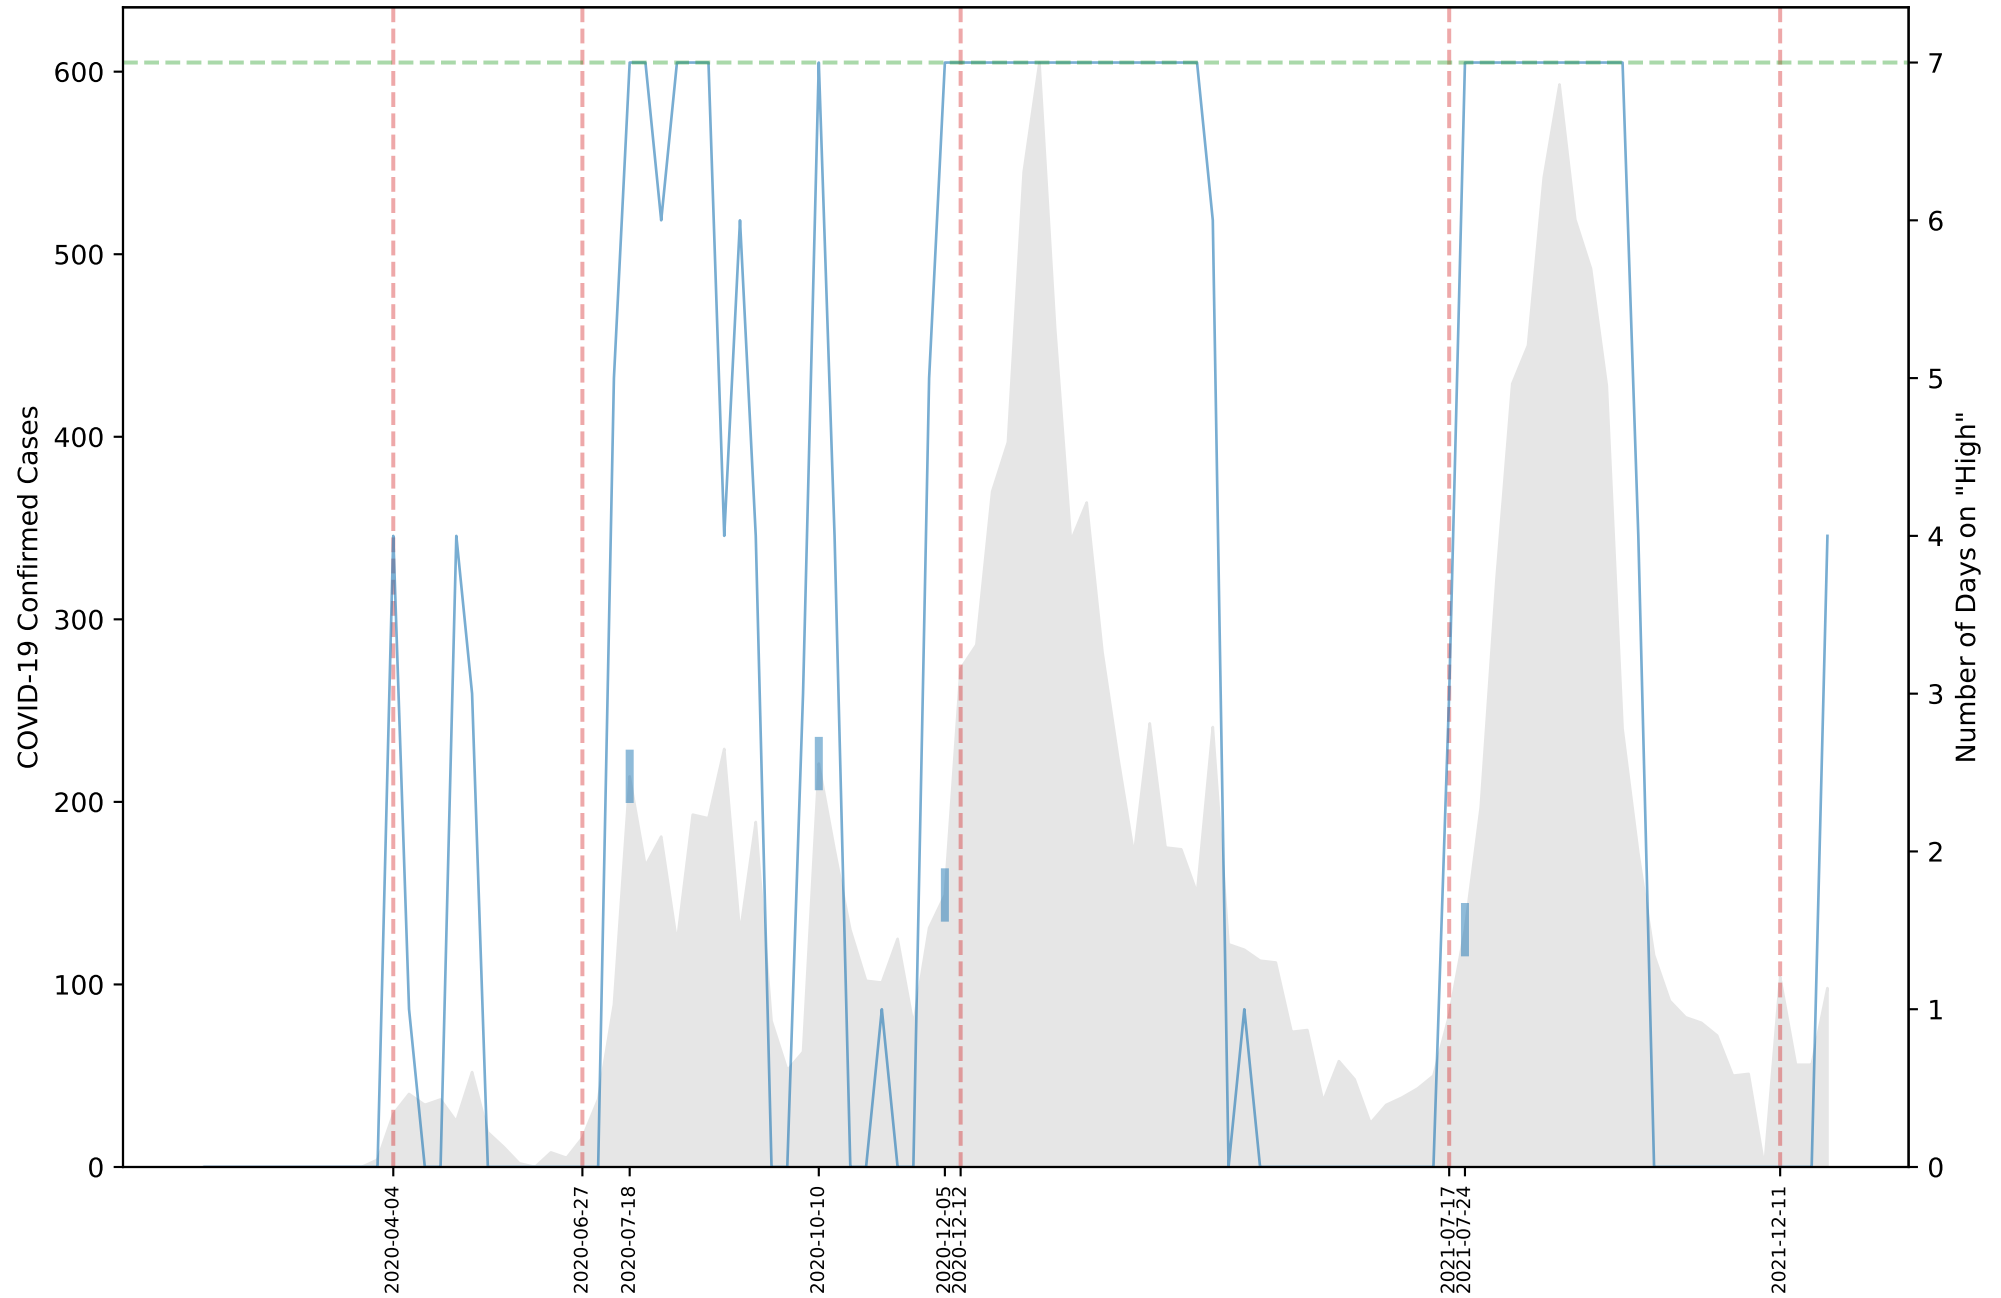

- Number of days on 'High' transmission per week
- - - Threshold to mark the beginning of epidemic event for CDC signal
- █ CDC beginning of events
- - -  $r_o$  (Parag's method)

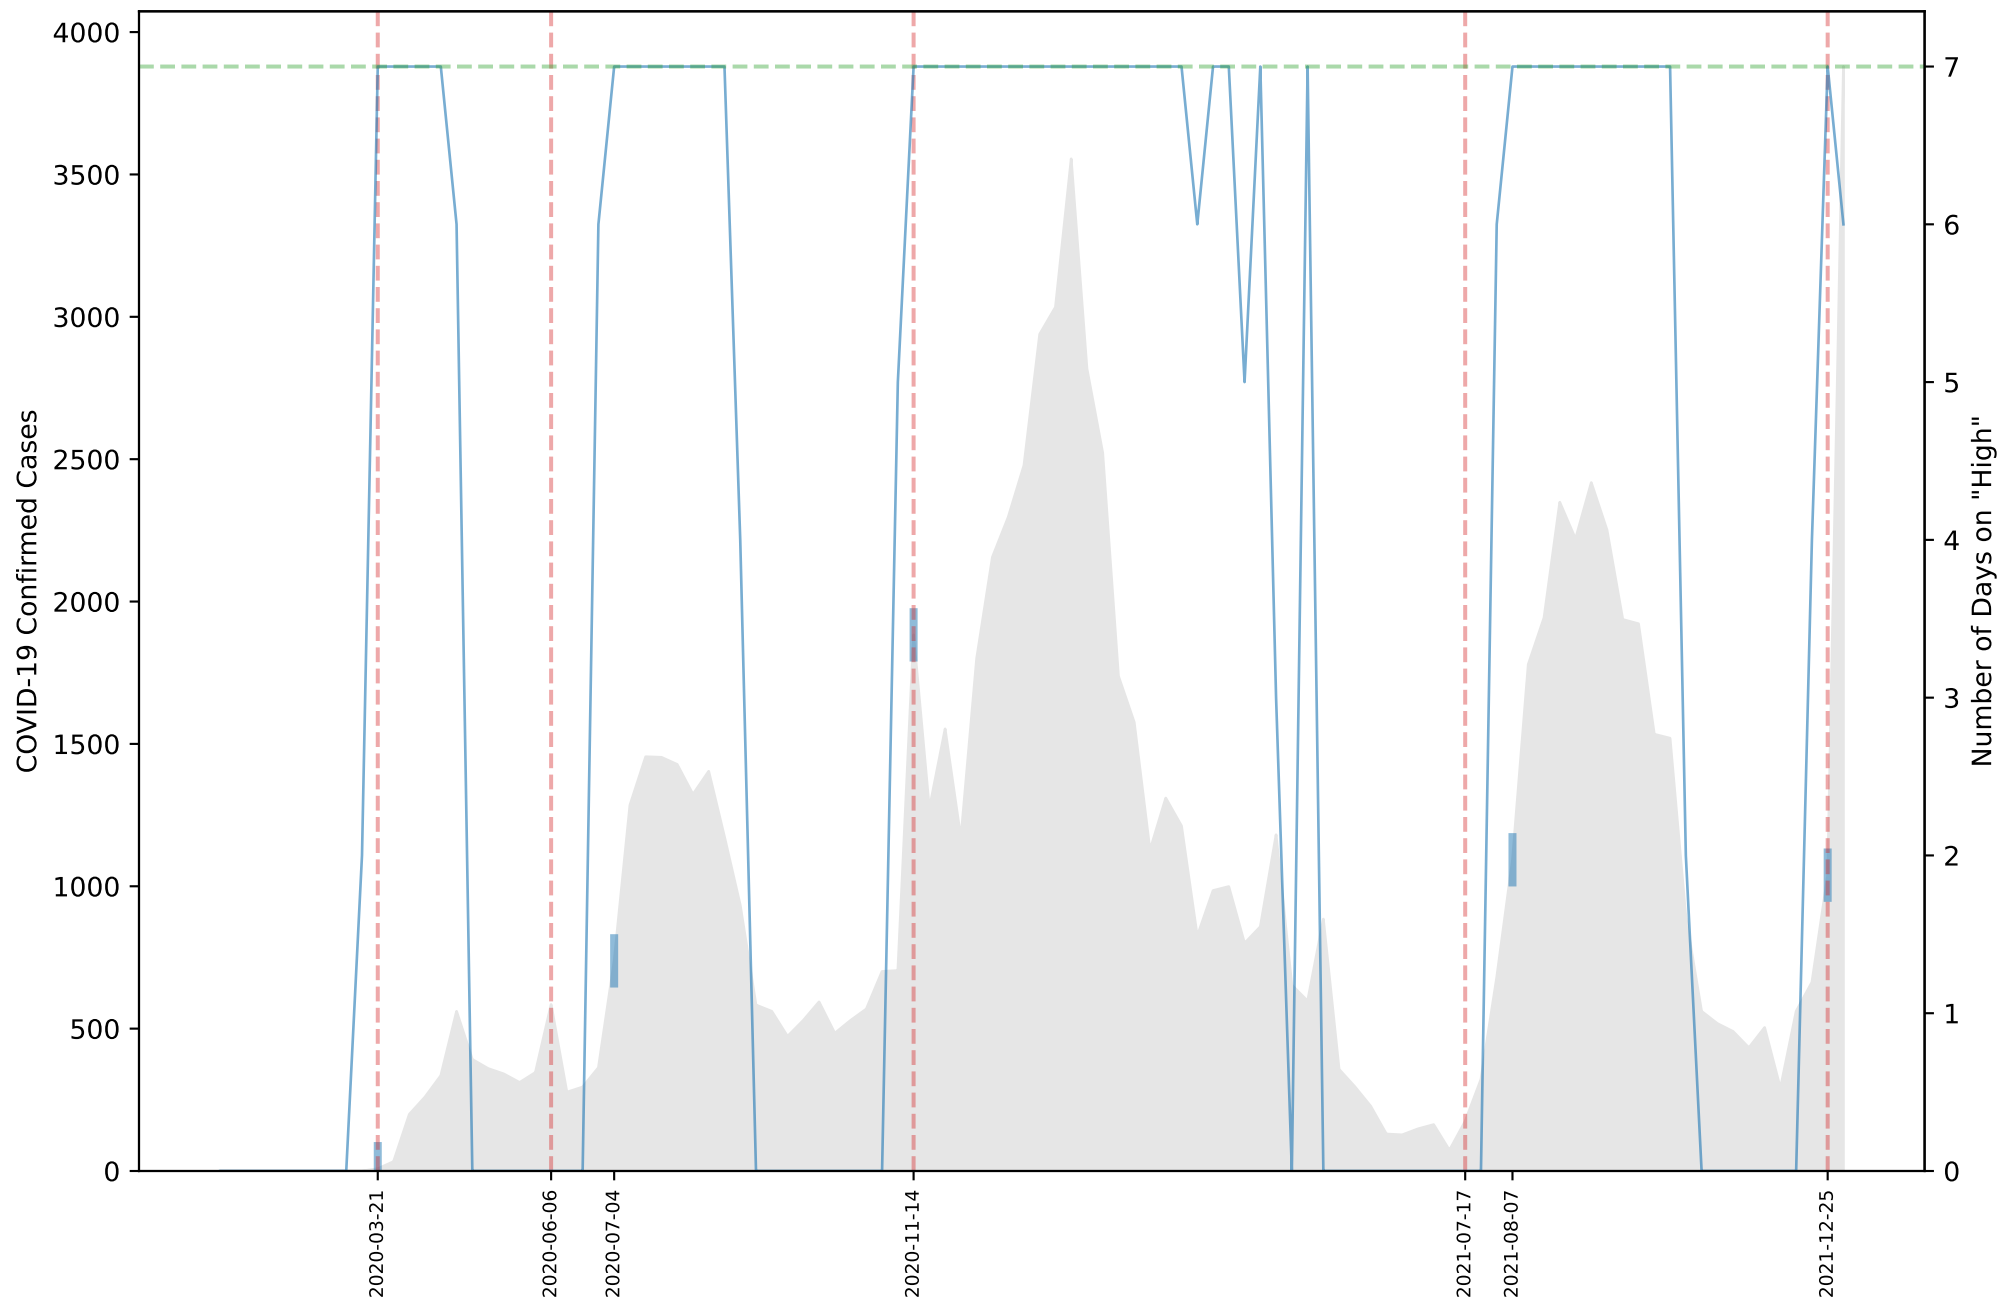

- Number of days on 'High' transmission per week
- - - Threshold to mark the beginning of epidemic event for CDC signal
- █ CDC beginning of events
- - -  $r_o$  (Parag's method)

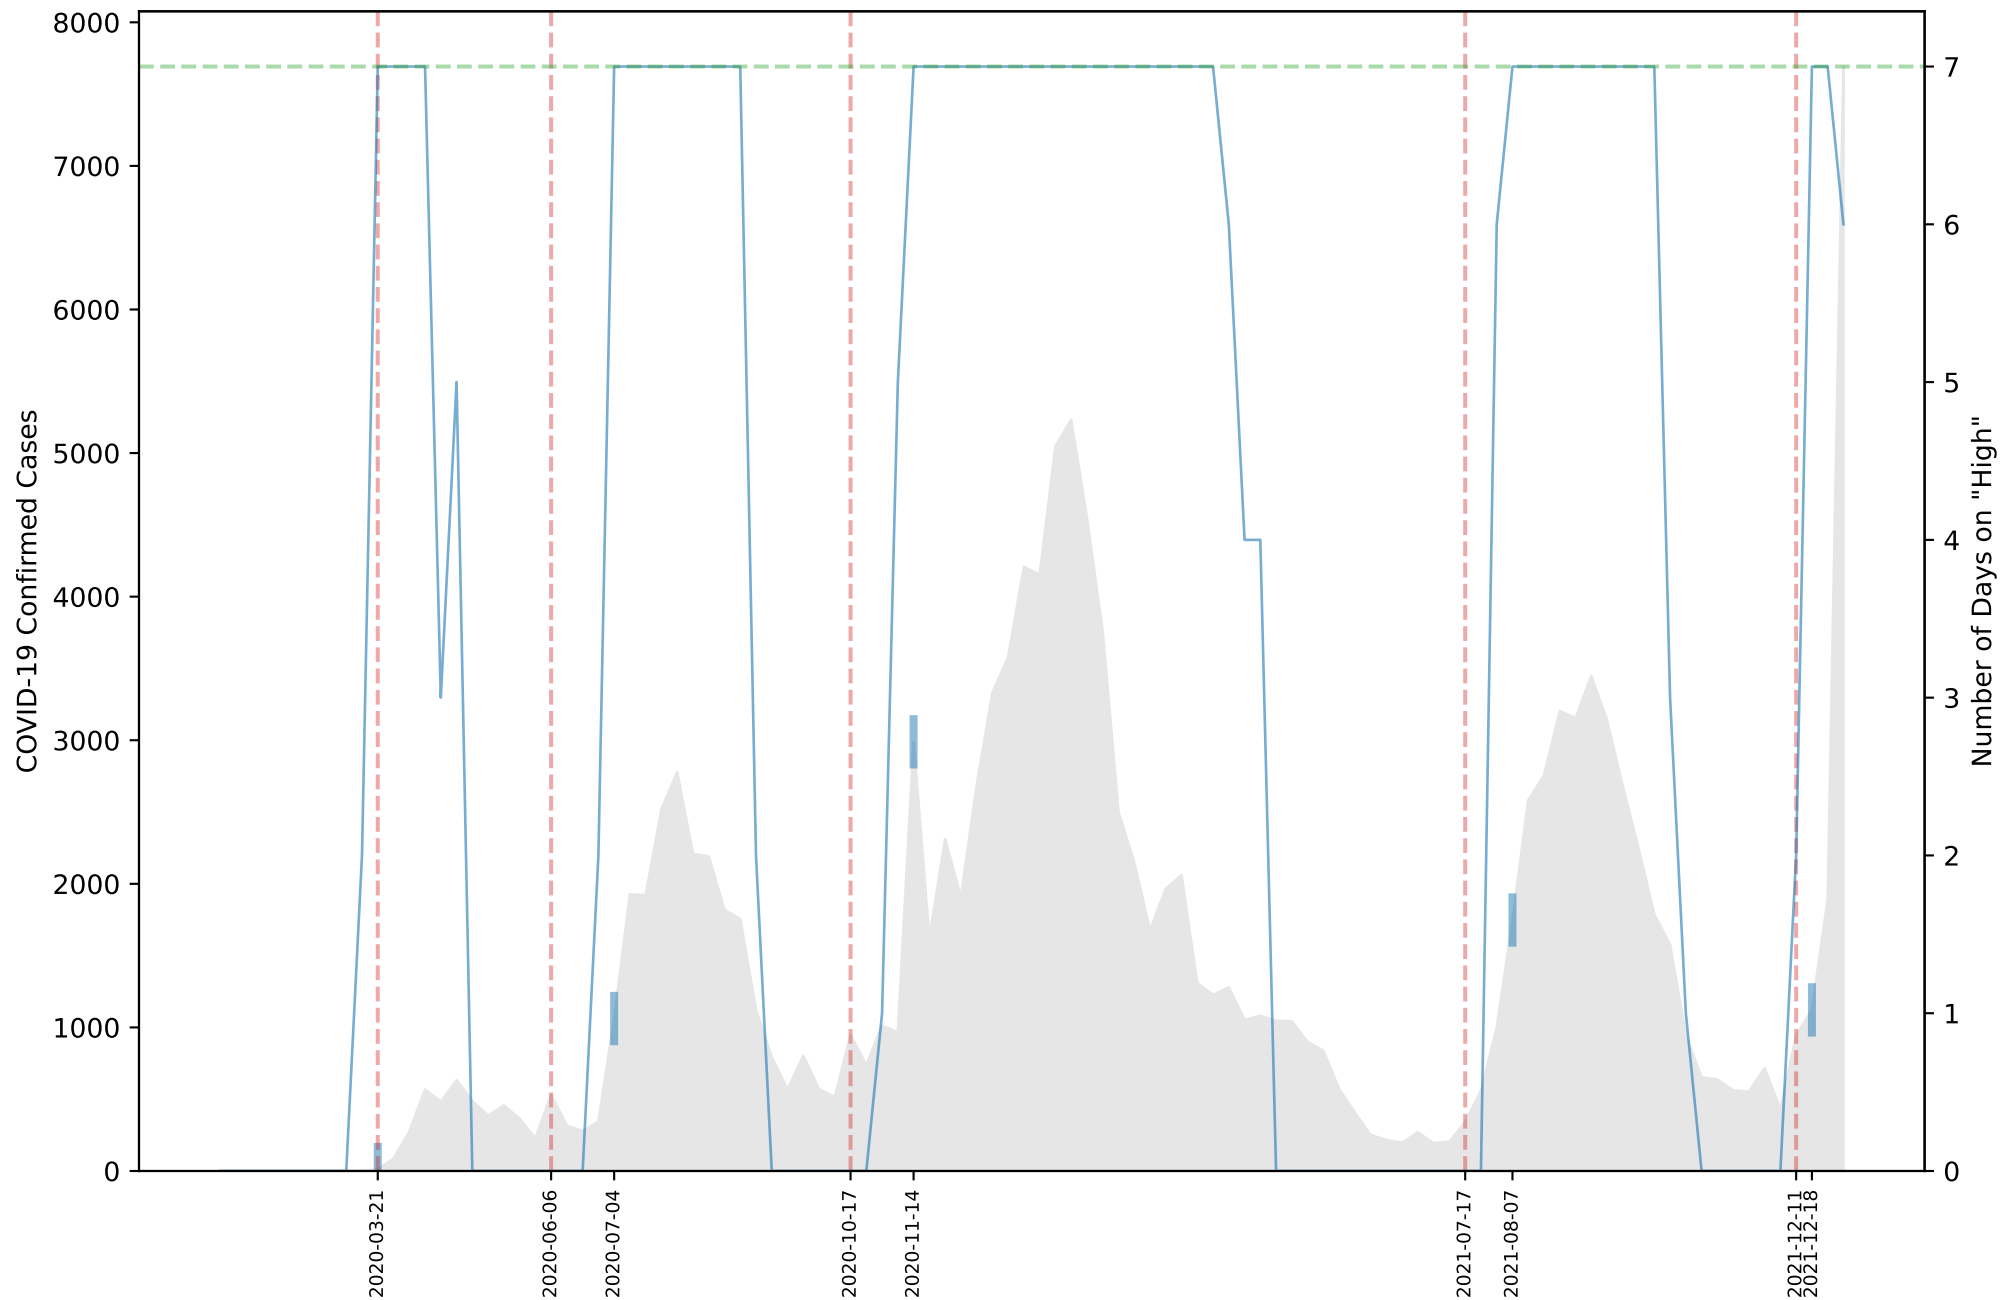

- Number of days on 'High' transmission per week
- Threshold to mark the beginning of epidemic event for CDC signal
- █ CDC beginning of events
- - -  $r_o$  (Parag's method)

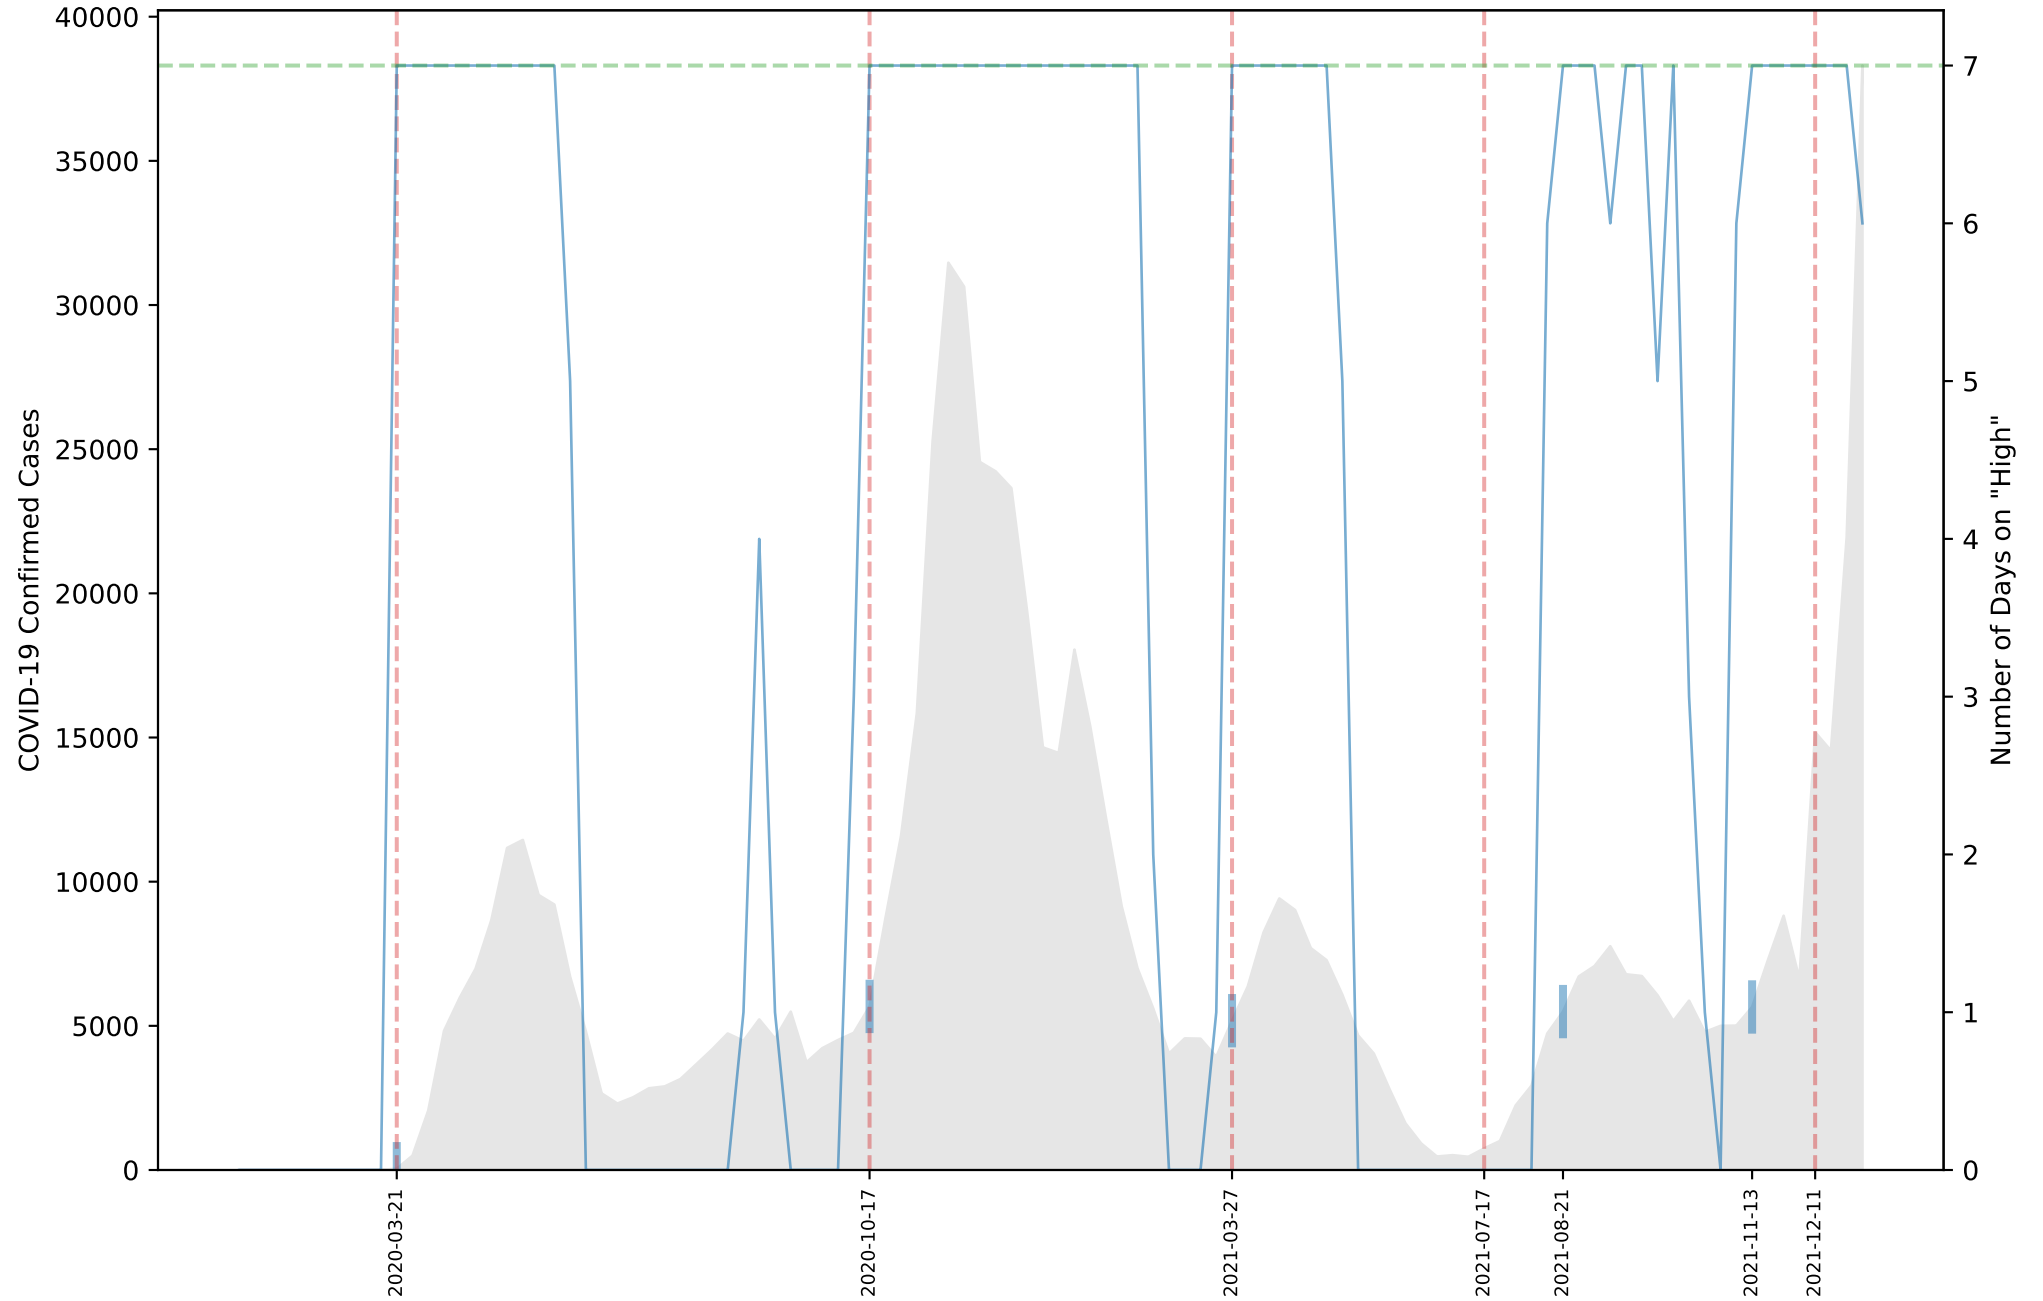

- Number of days on 'High' transmission per week
- Threshold to mark the beginning of epidemic event for CDC signal
- CDC beginning of events
- - -  $r_o$  (Parag's method)

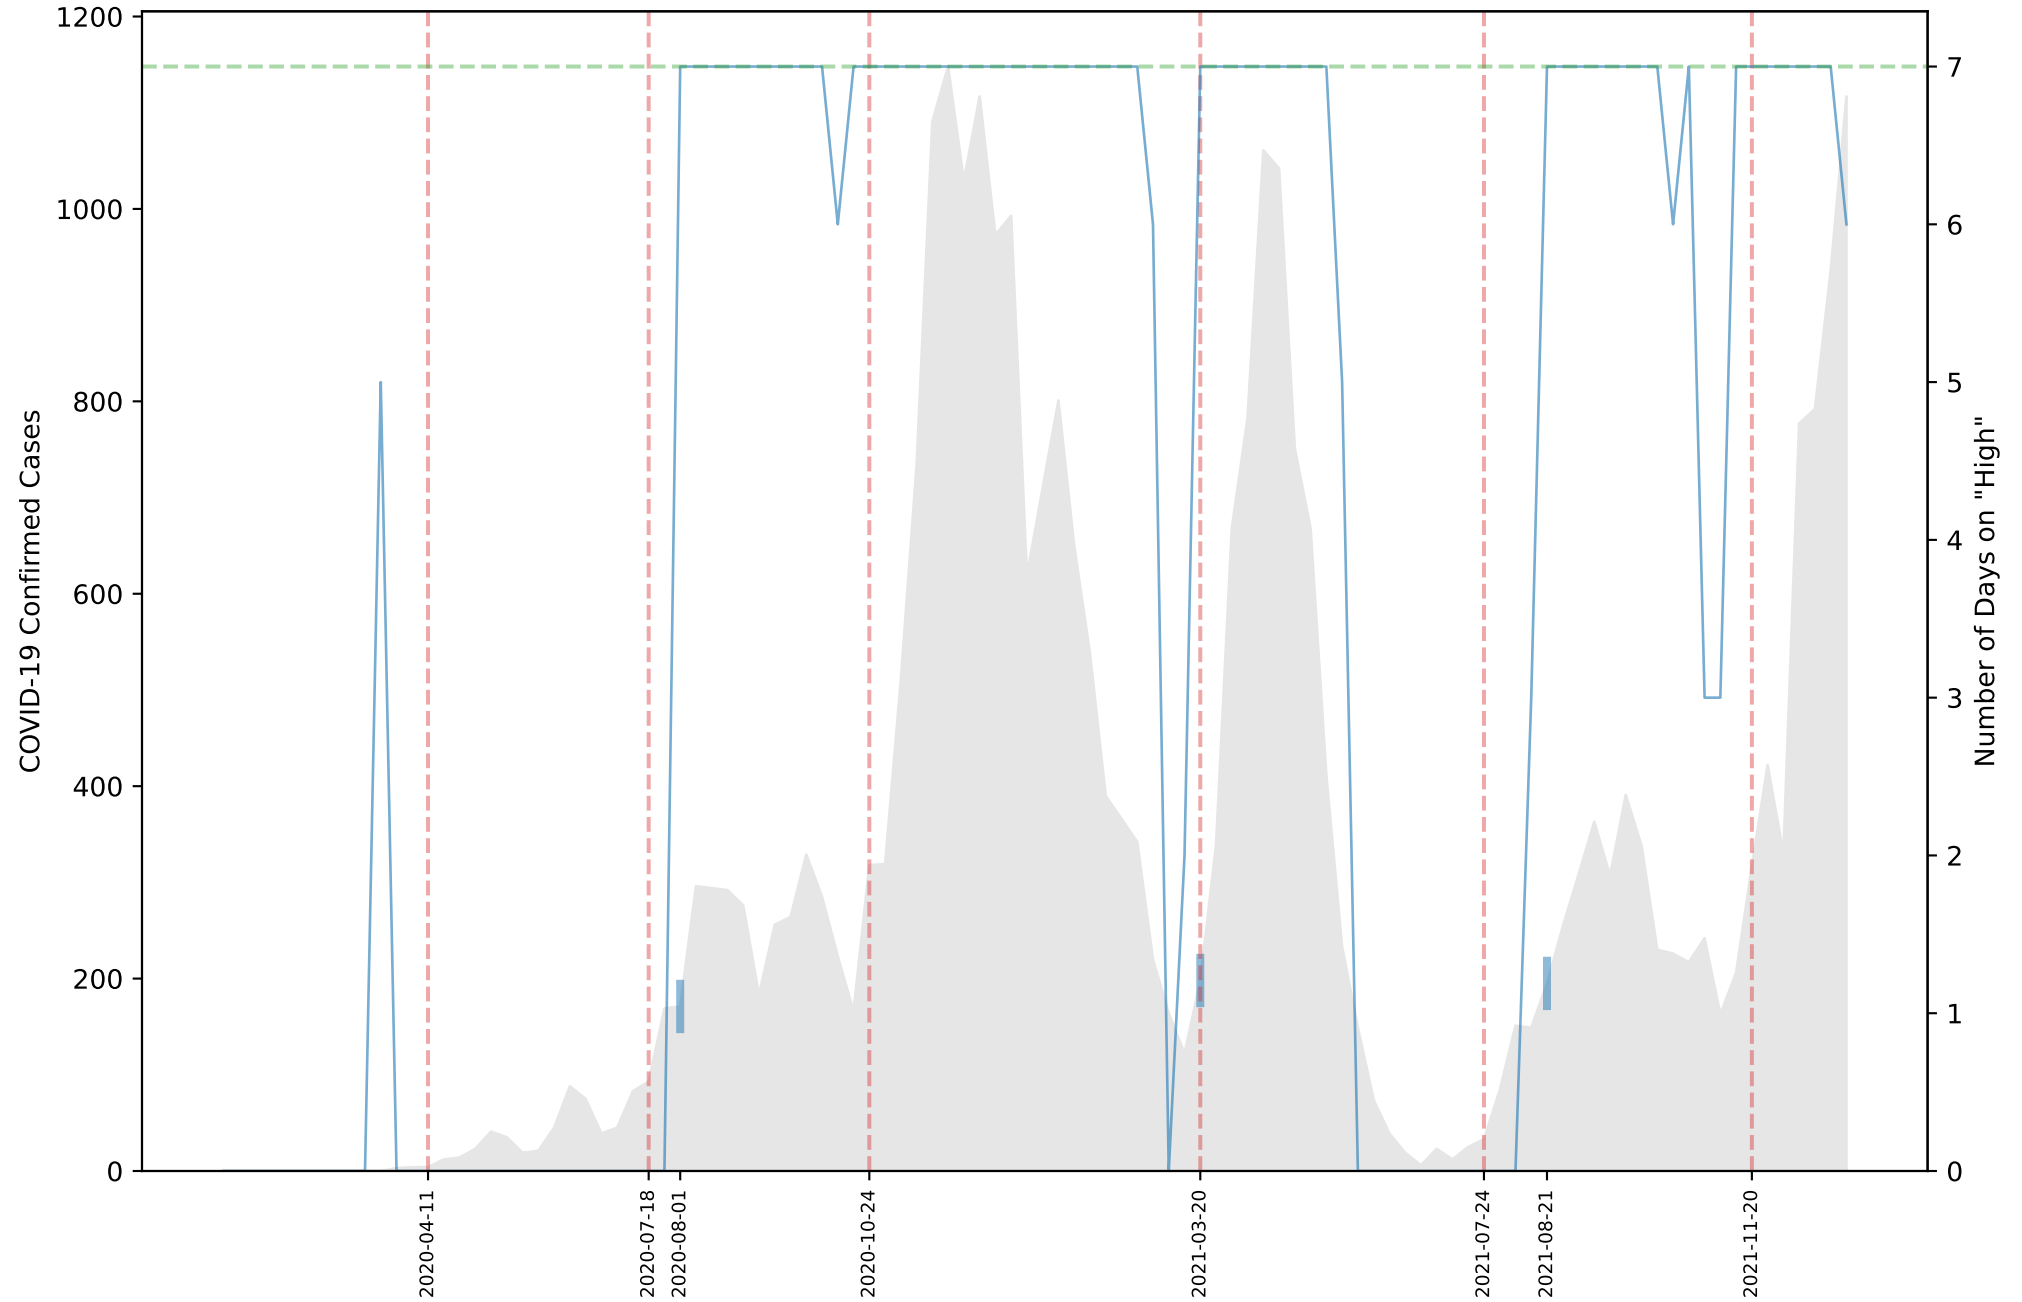

- Number of days on 'High' transmission per week
- - - Threshold to mark the beginning of epidemic event for CDC signal
- █ CDC beginning of events
- - -  $r_o$  (Parag's method)

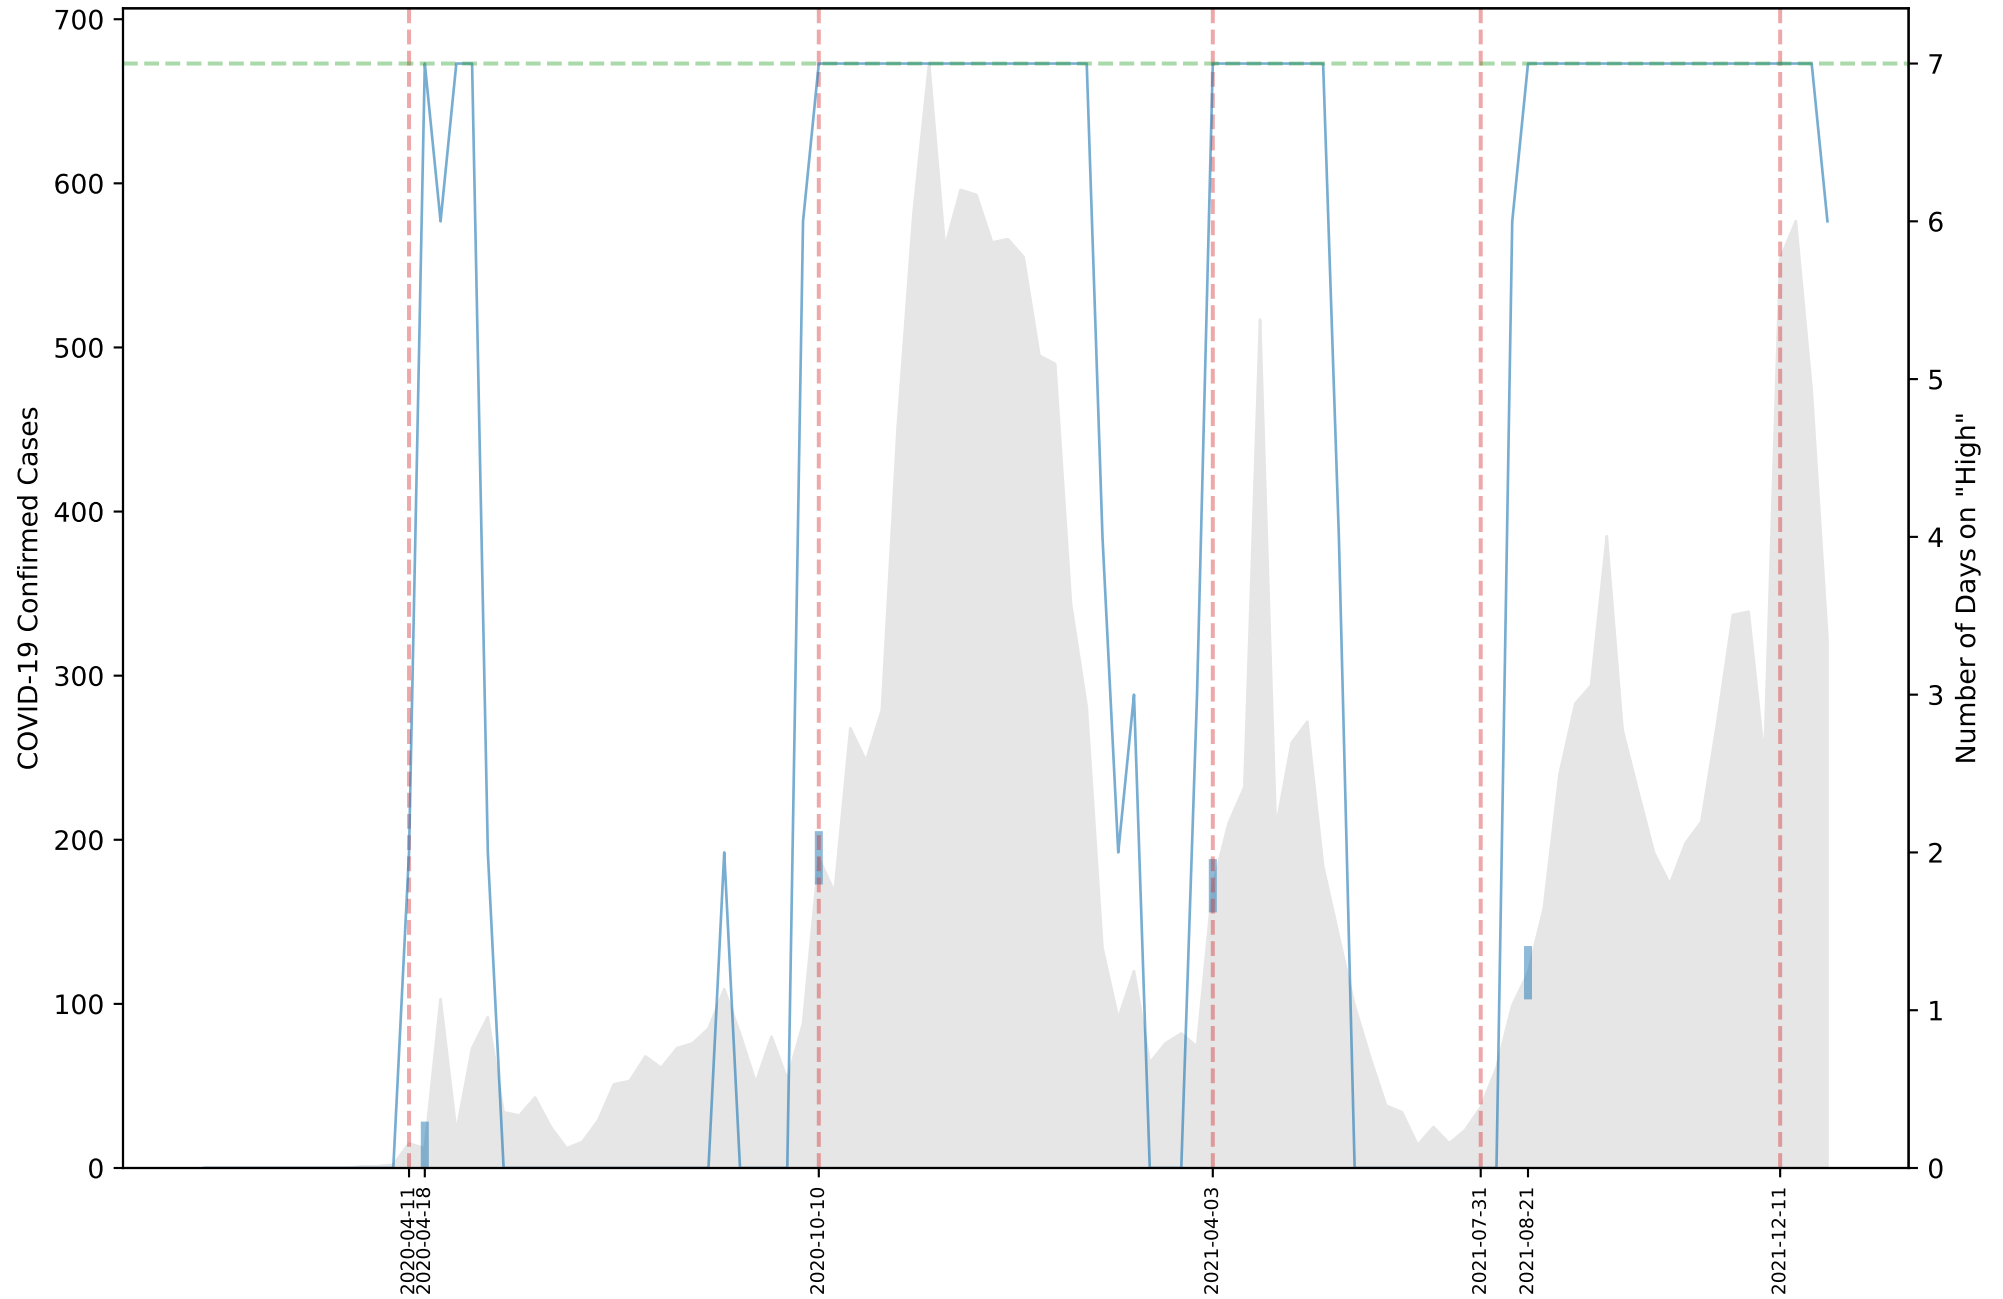



- Number of days on 'High' transmission per week
- Threshold to mark the beginning of epidemic event for CDC signal
- █ CDC beginning of events
- - -  $r_o$  (Parag's method)

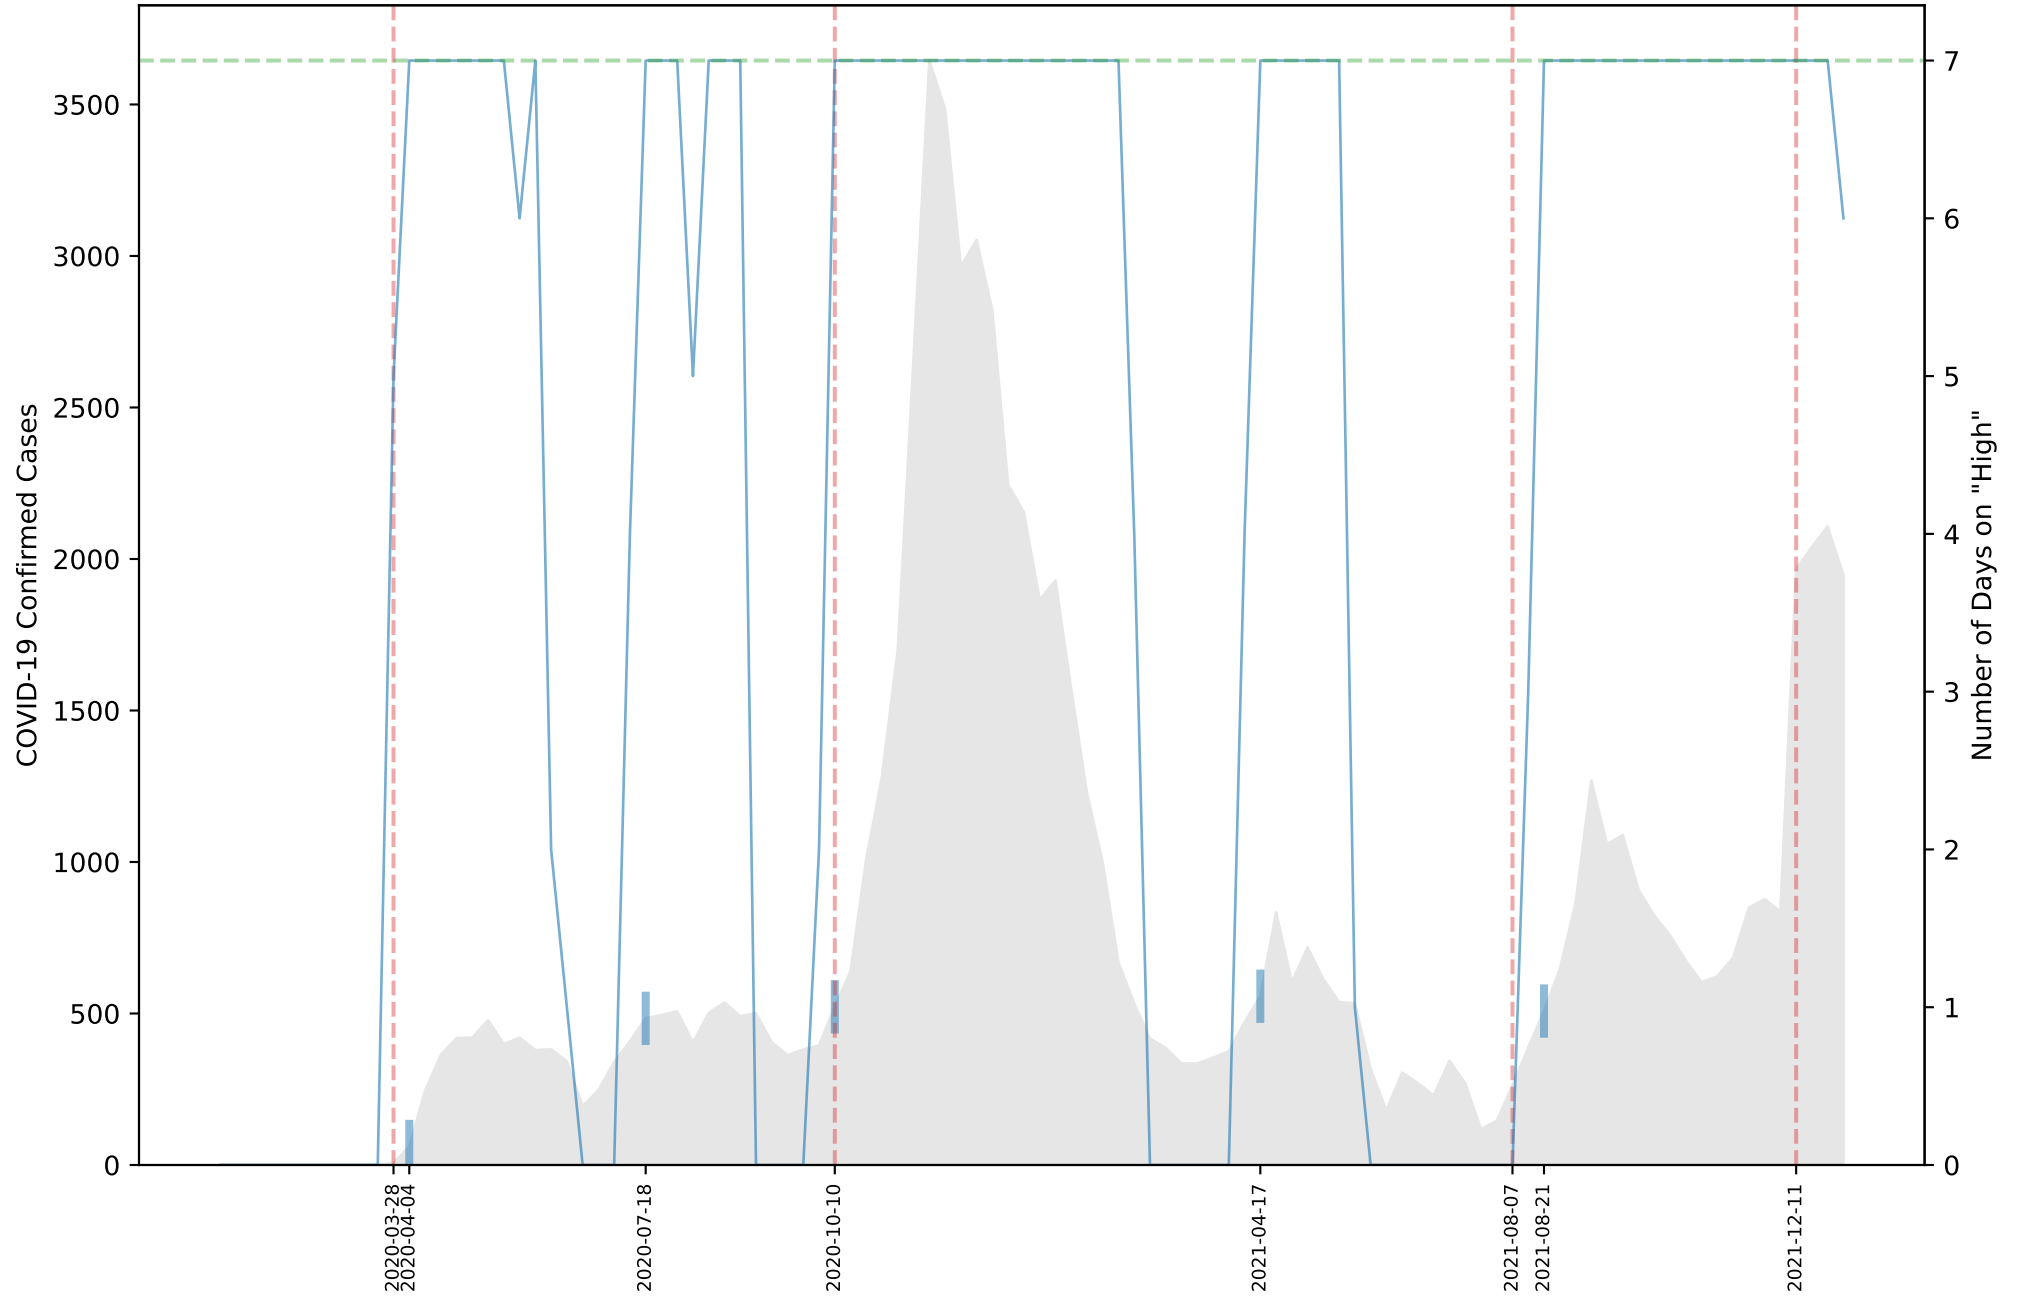

- Number of days on 'High' transmission per week
- - - Threshold to mark the beginning of epidemic event for CDC signal
- █ CDC beginning of events
- - -  $r_o$  (Parag's method)

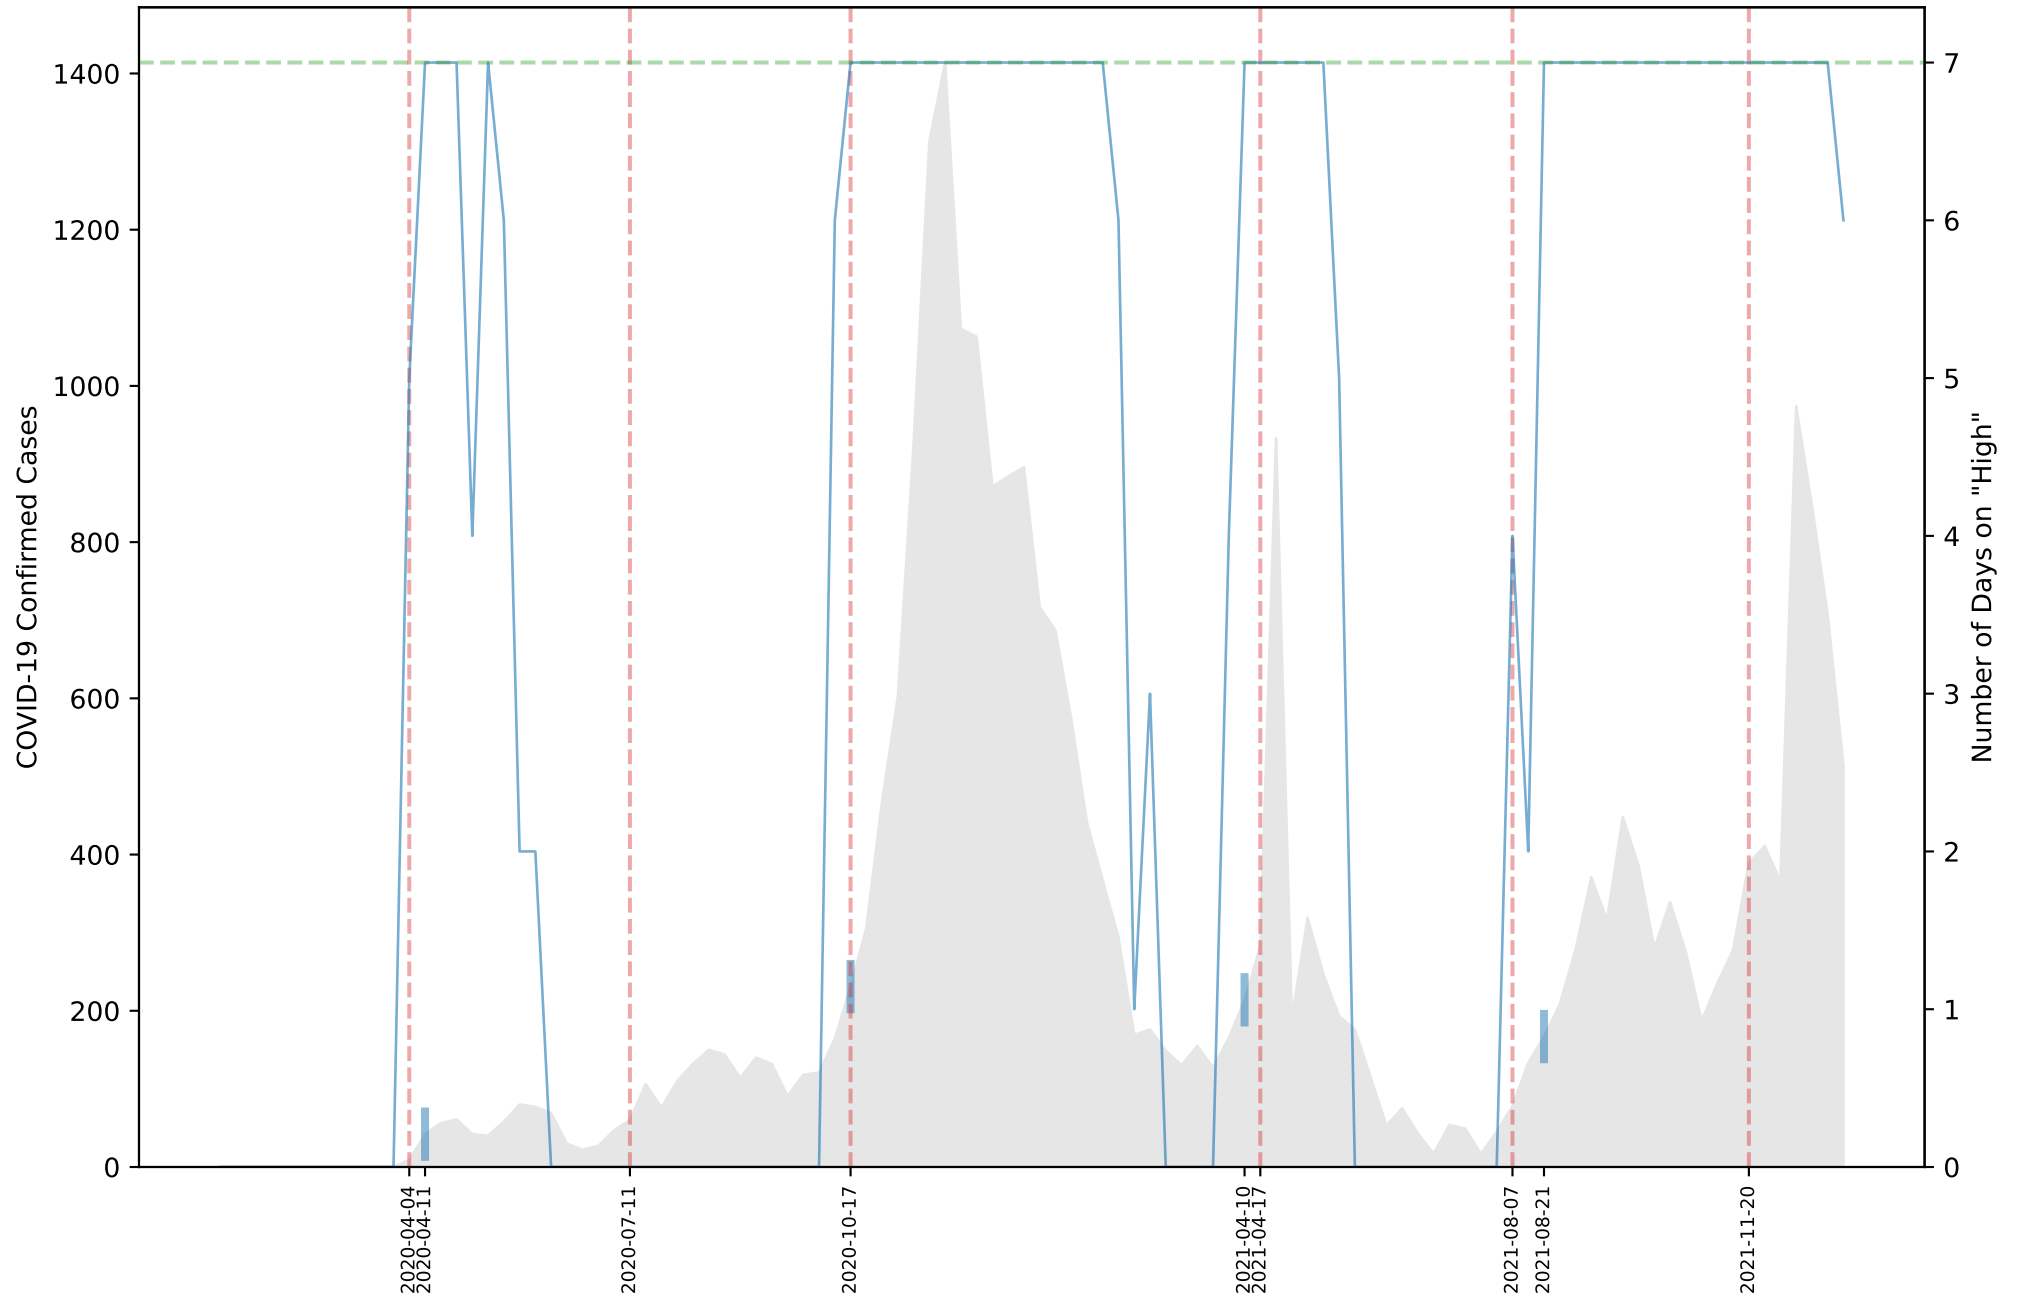

- Number of days on 'High' transmission per week
- - - Threshold to mark the beginning of epidemic event for CDC signal
- █ CDC beginning of events
- - -  $r_0$  (Parag's method)

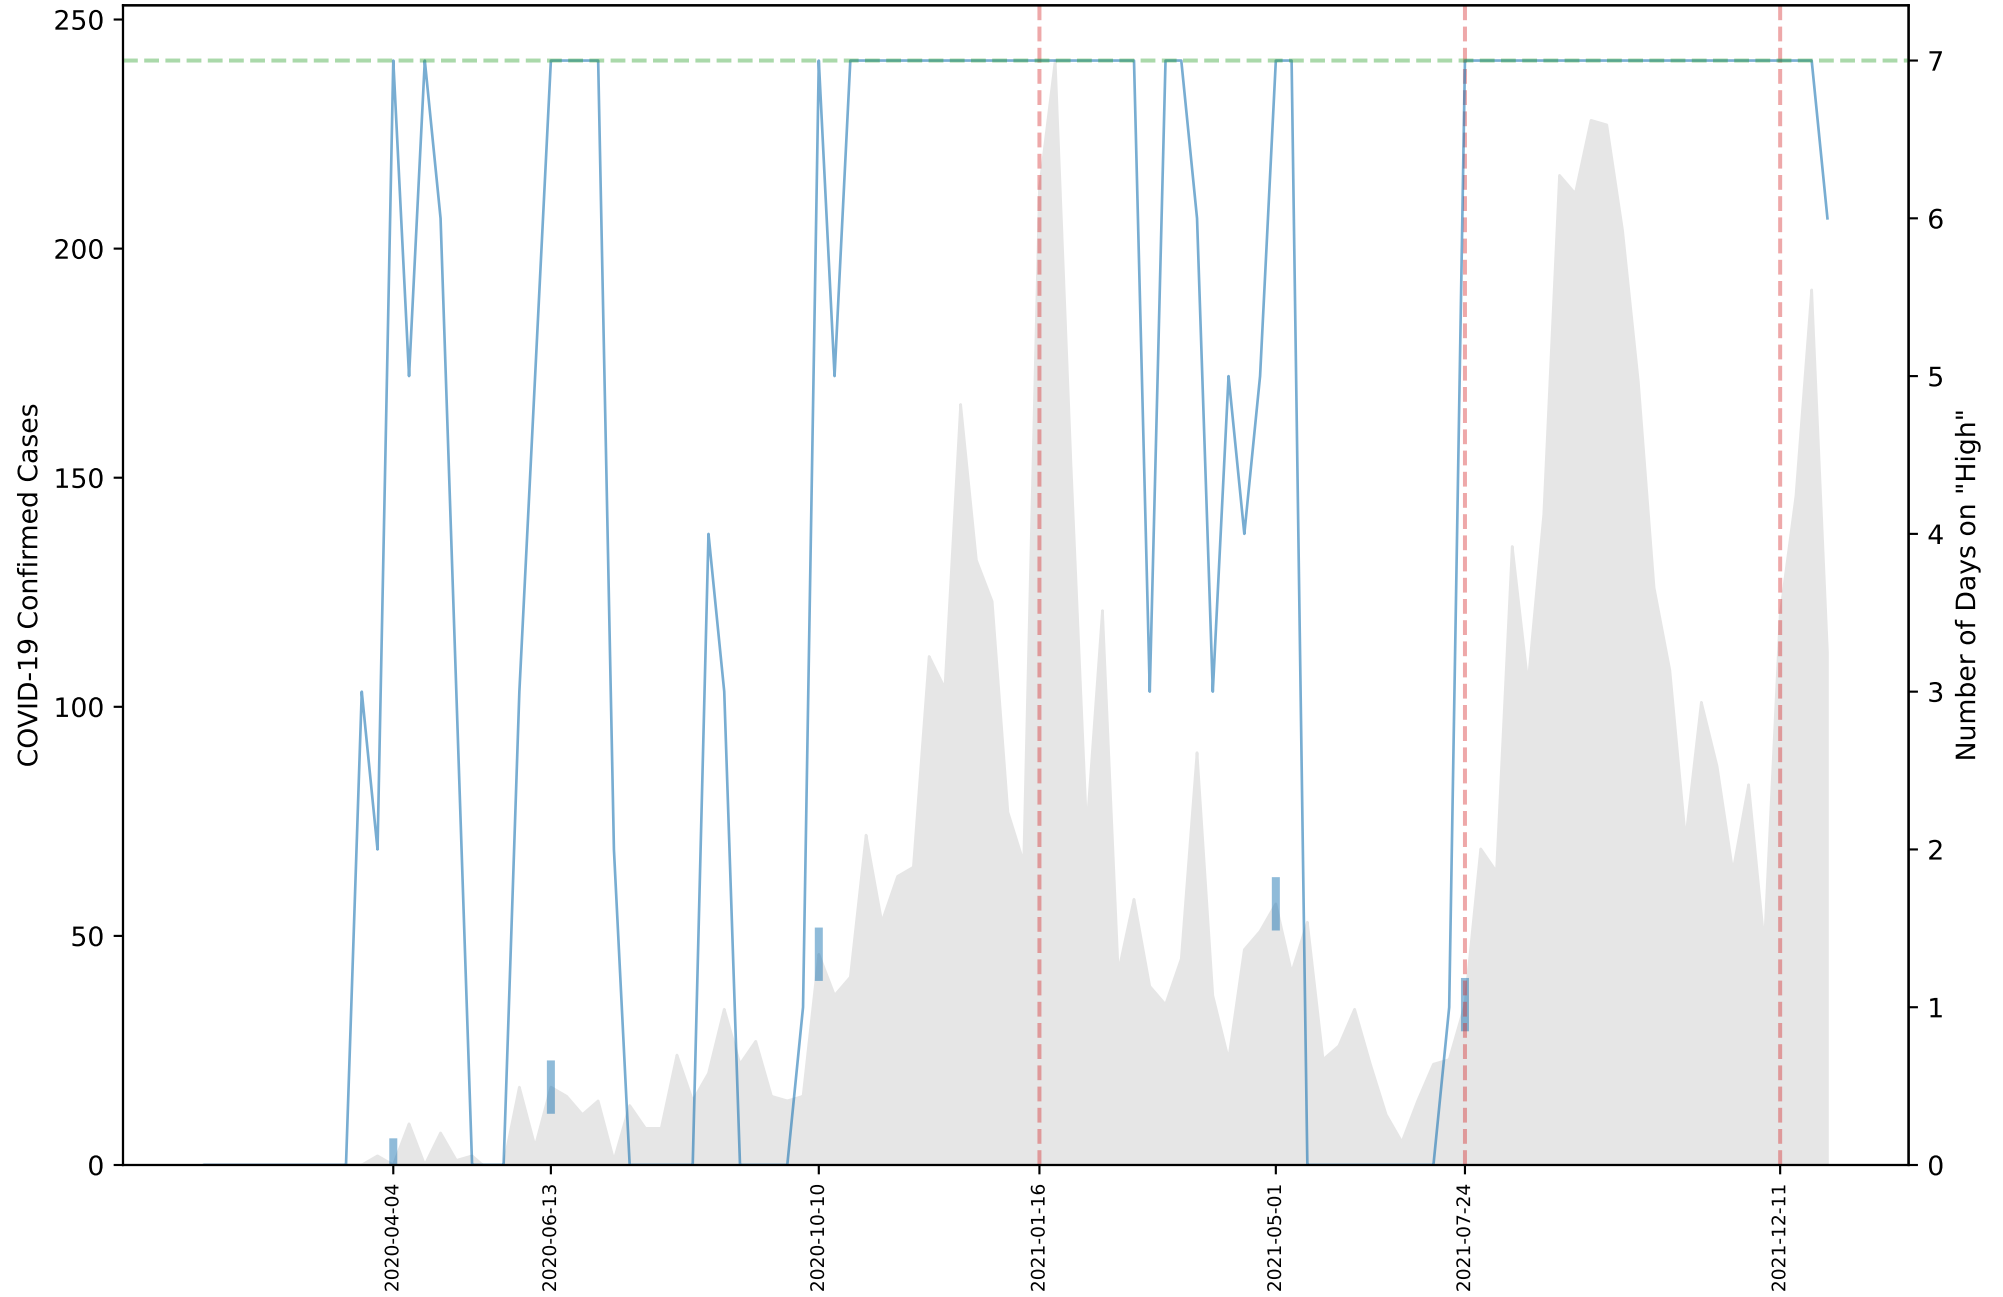

- Number of days on 'High' transmission per week
- - - Threshold to mark the beginning of epidemic event for CDC signal
- ▮ CDC beginning of events
- - -  $r_o$  (Parag's method)

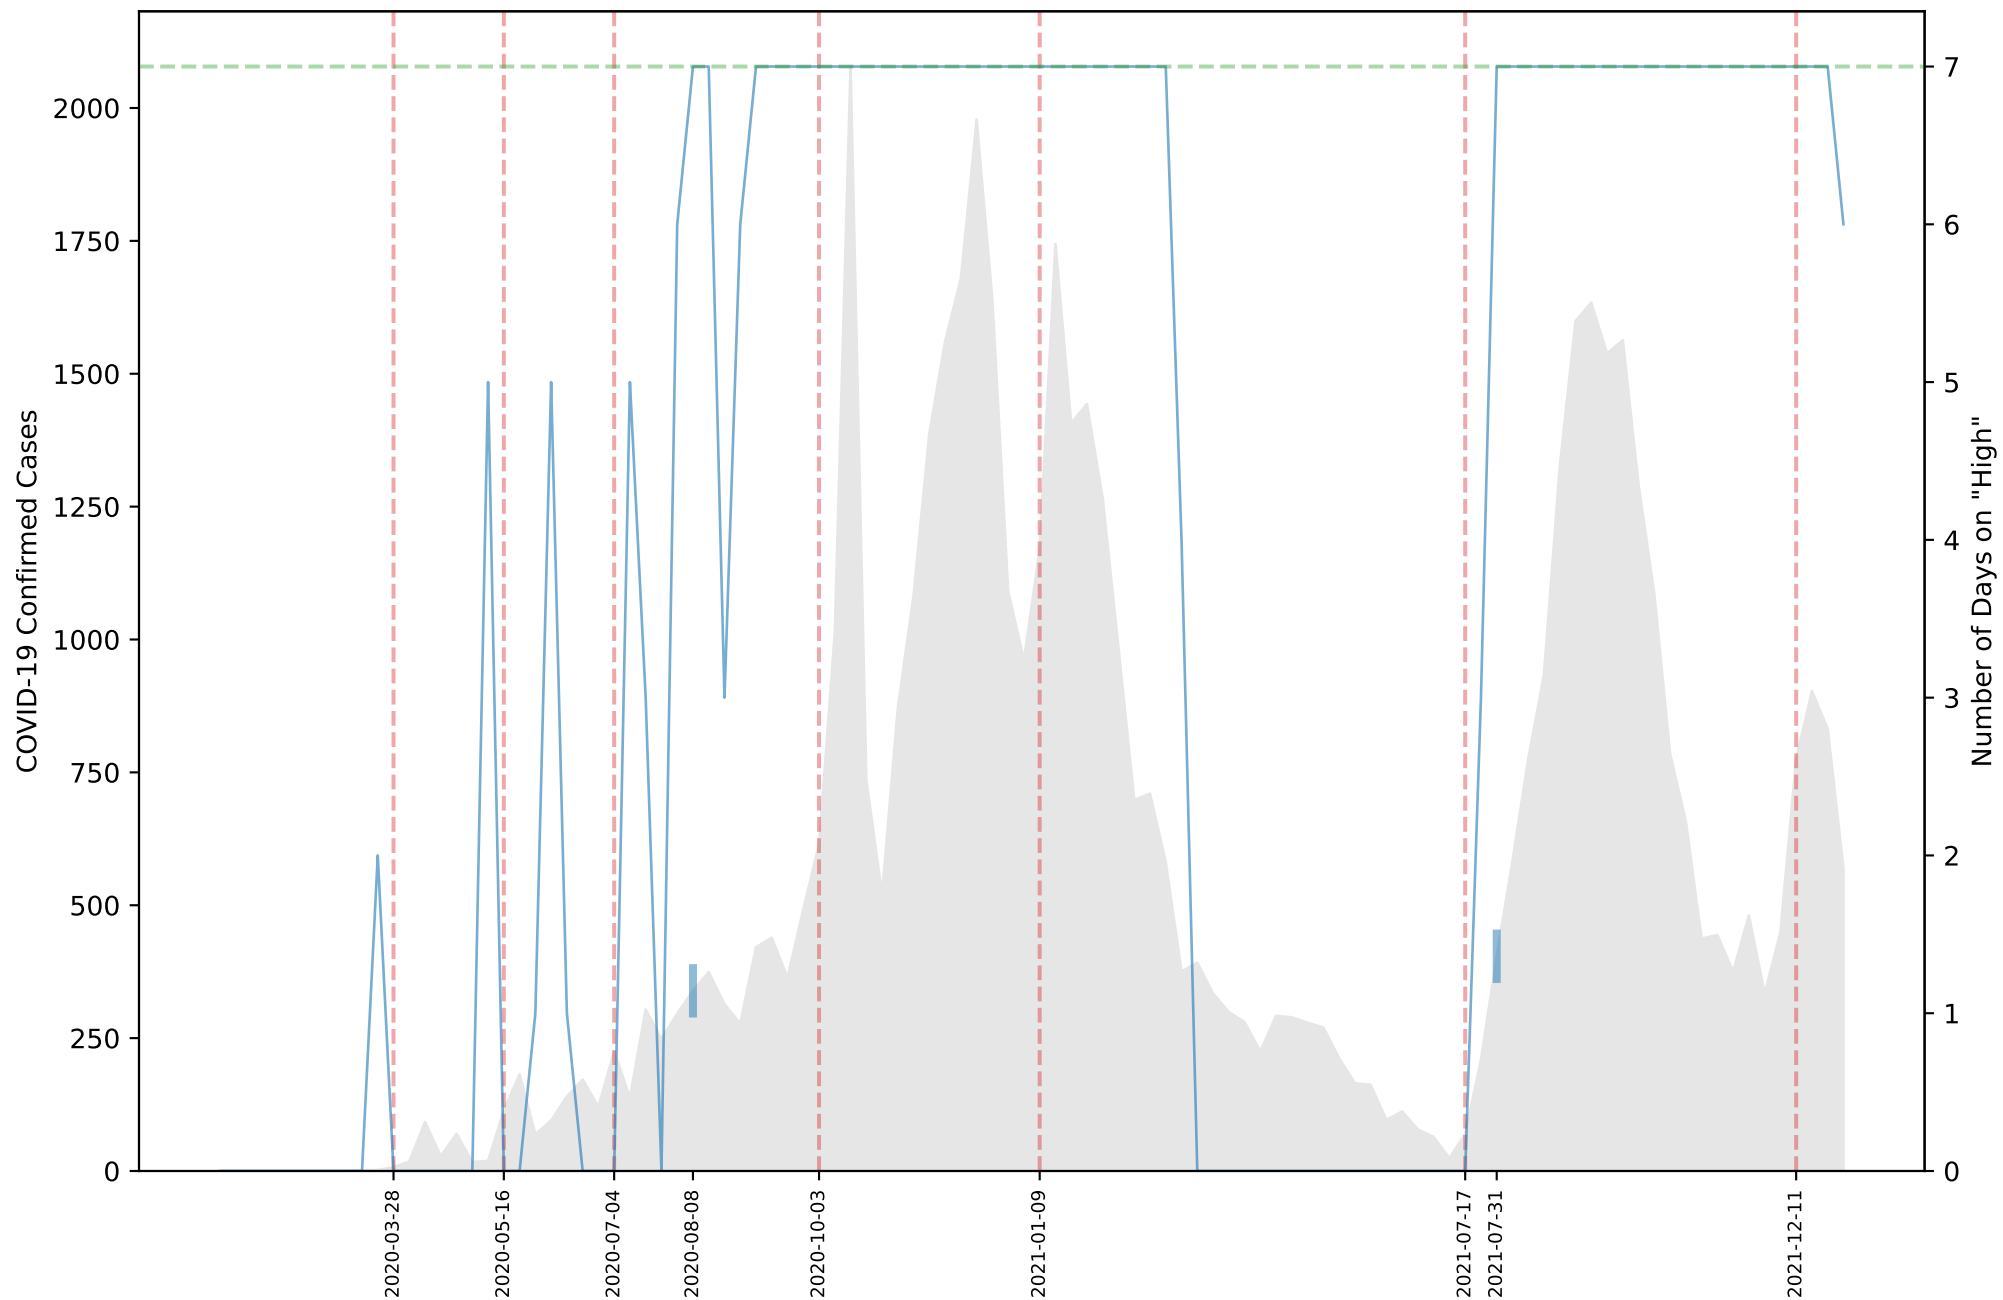

- Number of days on 'High' transmission per week
- - - Threshold to mark the beginning of epidemic event for CDC signal
- █ CDC beginning of events
- - -  $r_o$  (Parag's method)

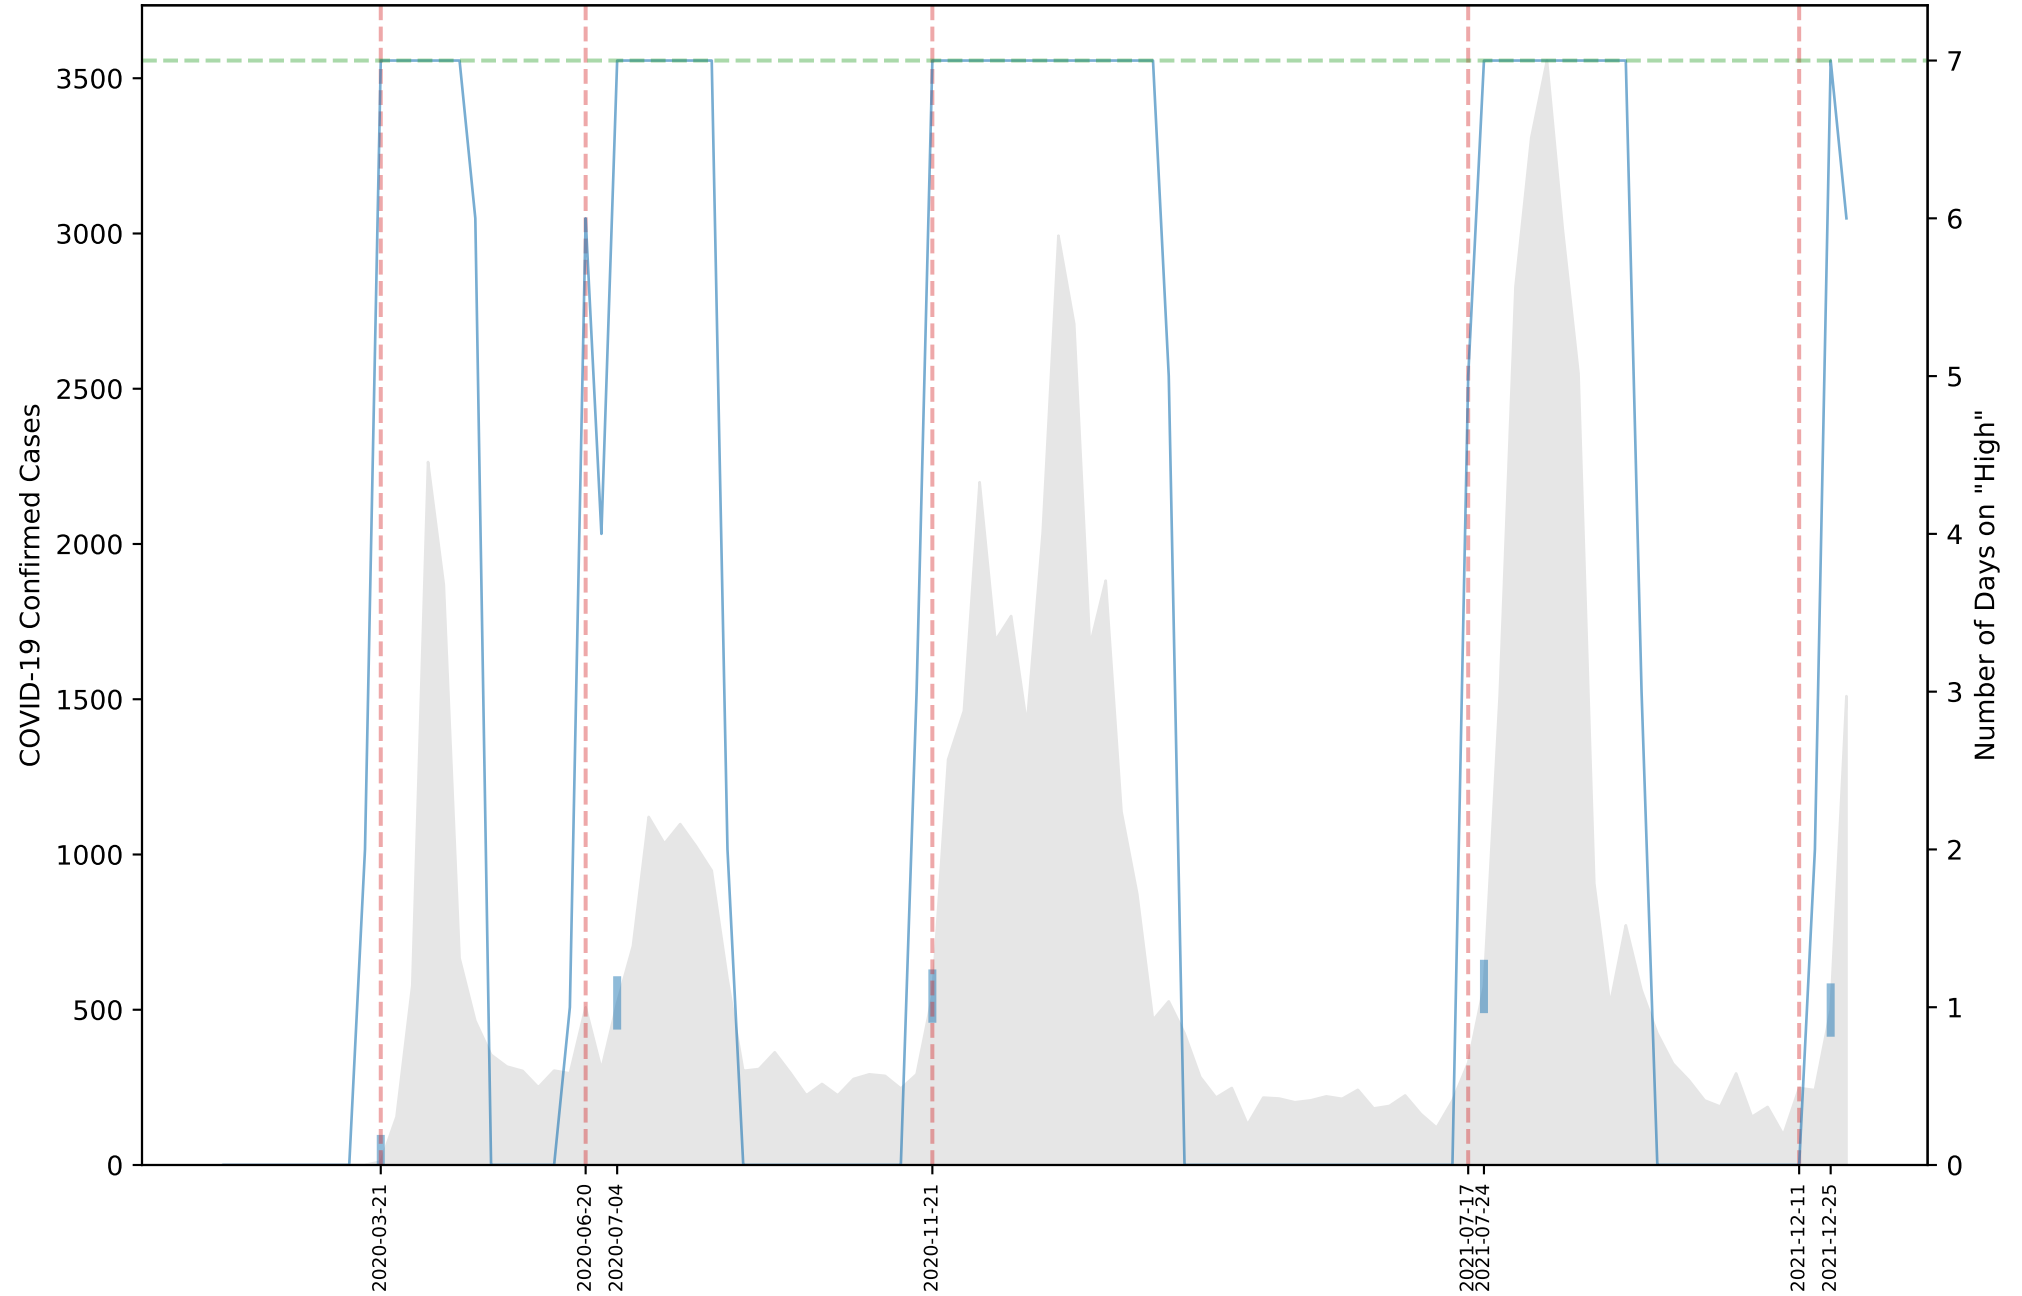

- Number of days on 'High' transmission per week
- - - Threshold to mark the beginning of epidemic event for CDC signal
- █ CDC beginning of events
- - -  $r_o$  (Parag's method)

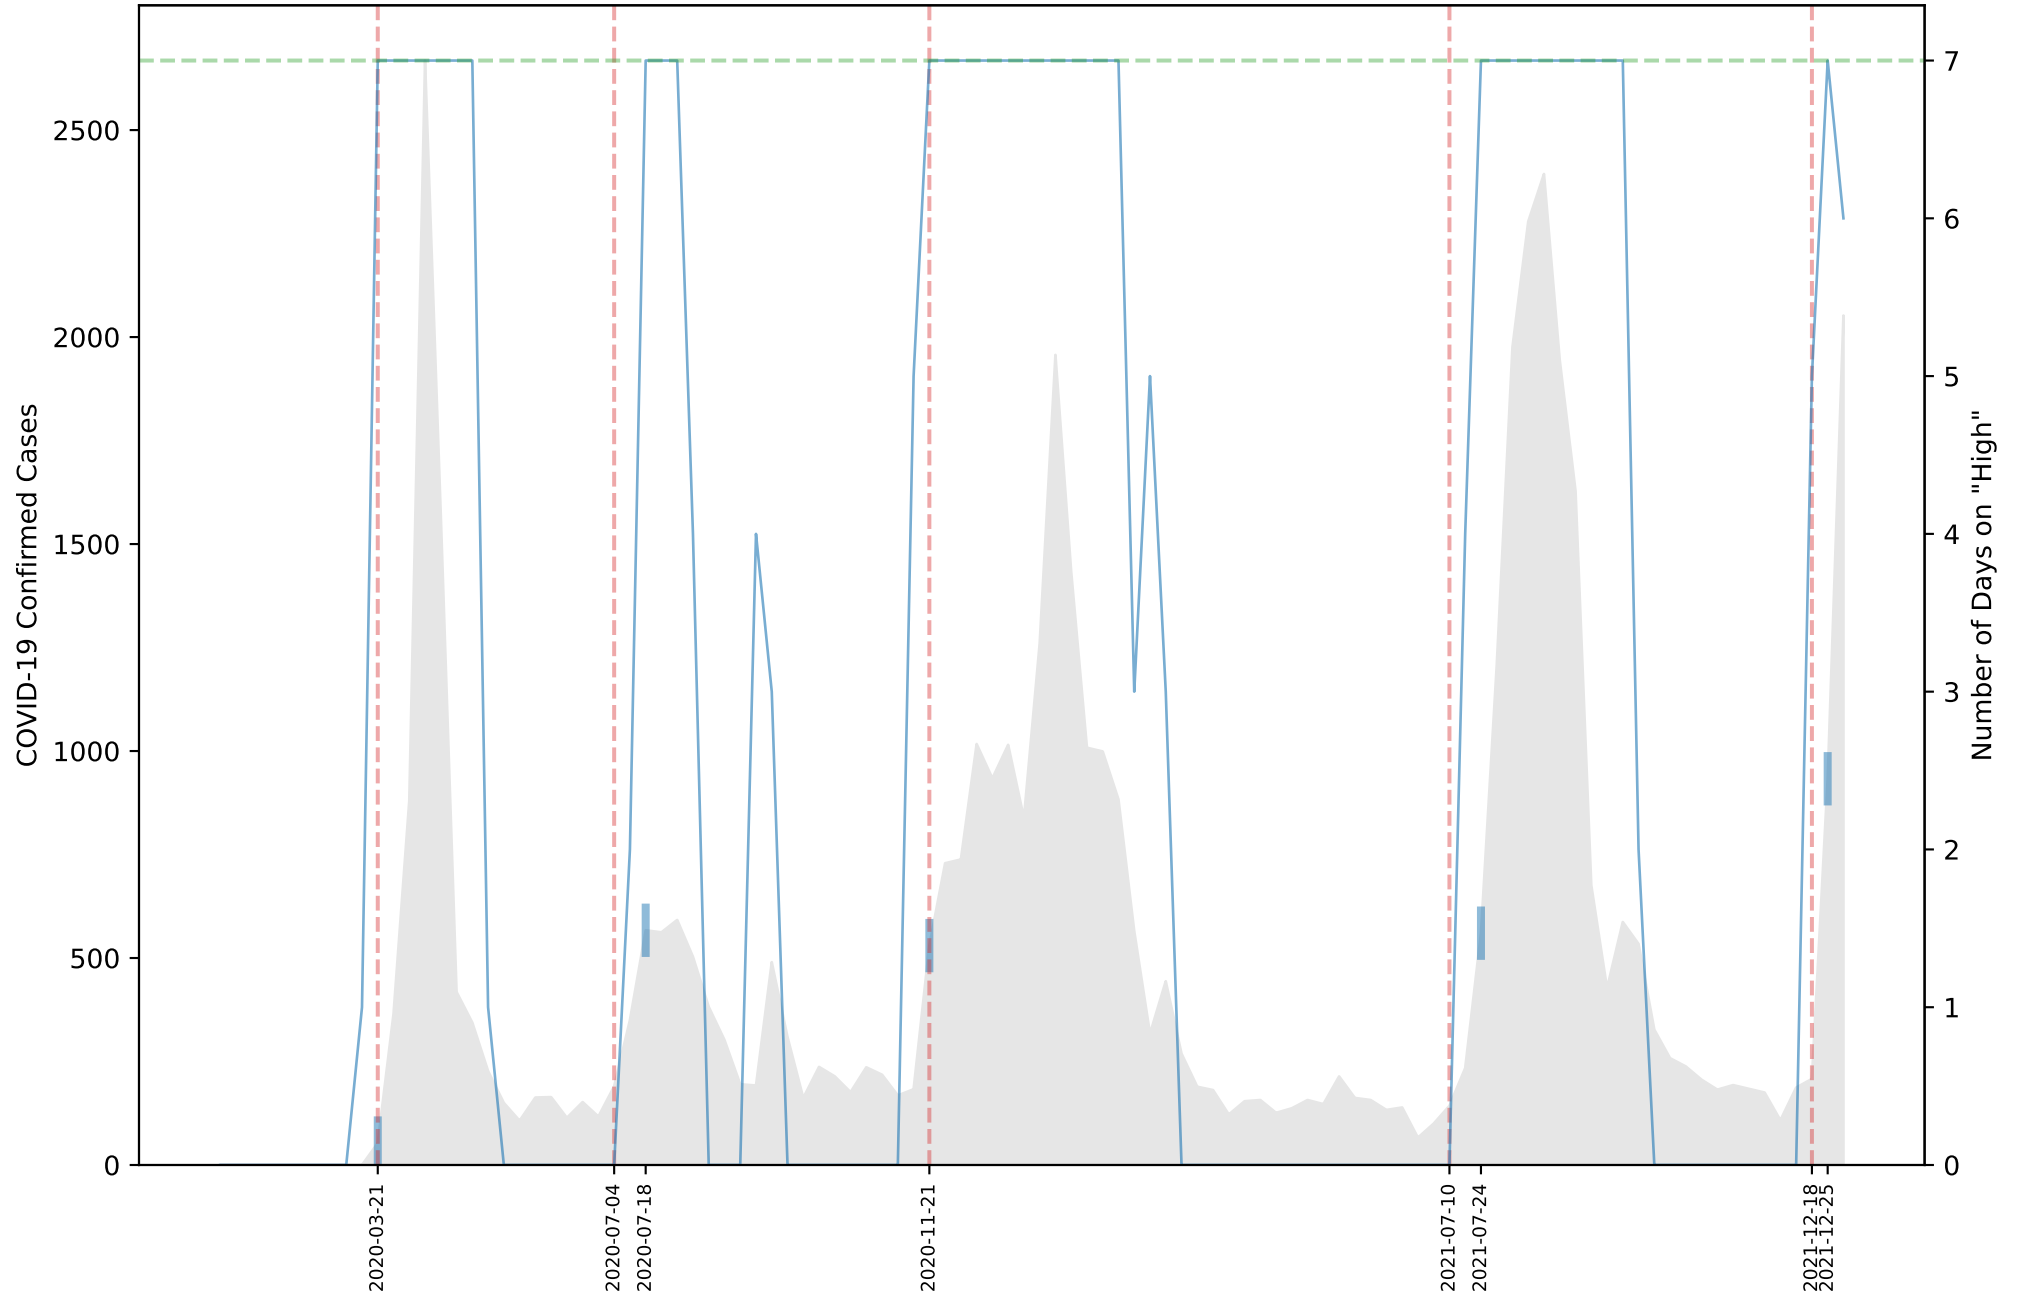

- Number of days on 'High' transmission per week
- - - Threshold to mark the beginning of epidemic event for CDC signal
- █ CDC beginning of events
- - -  $r_o$  (Parag's method)

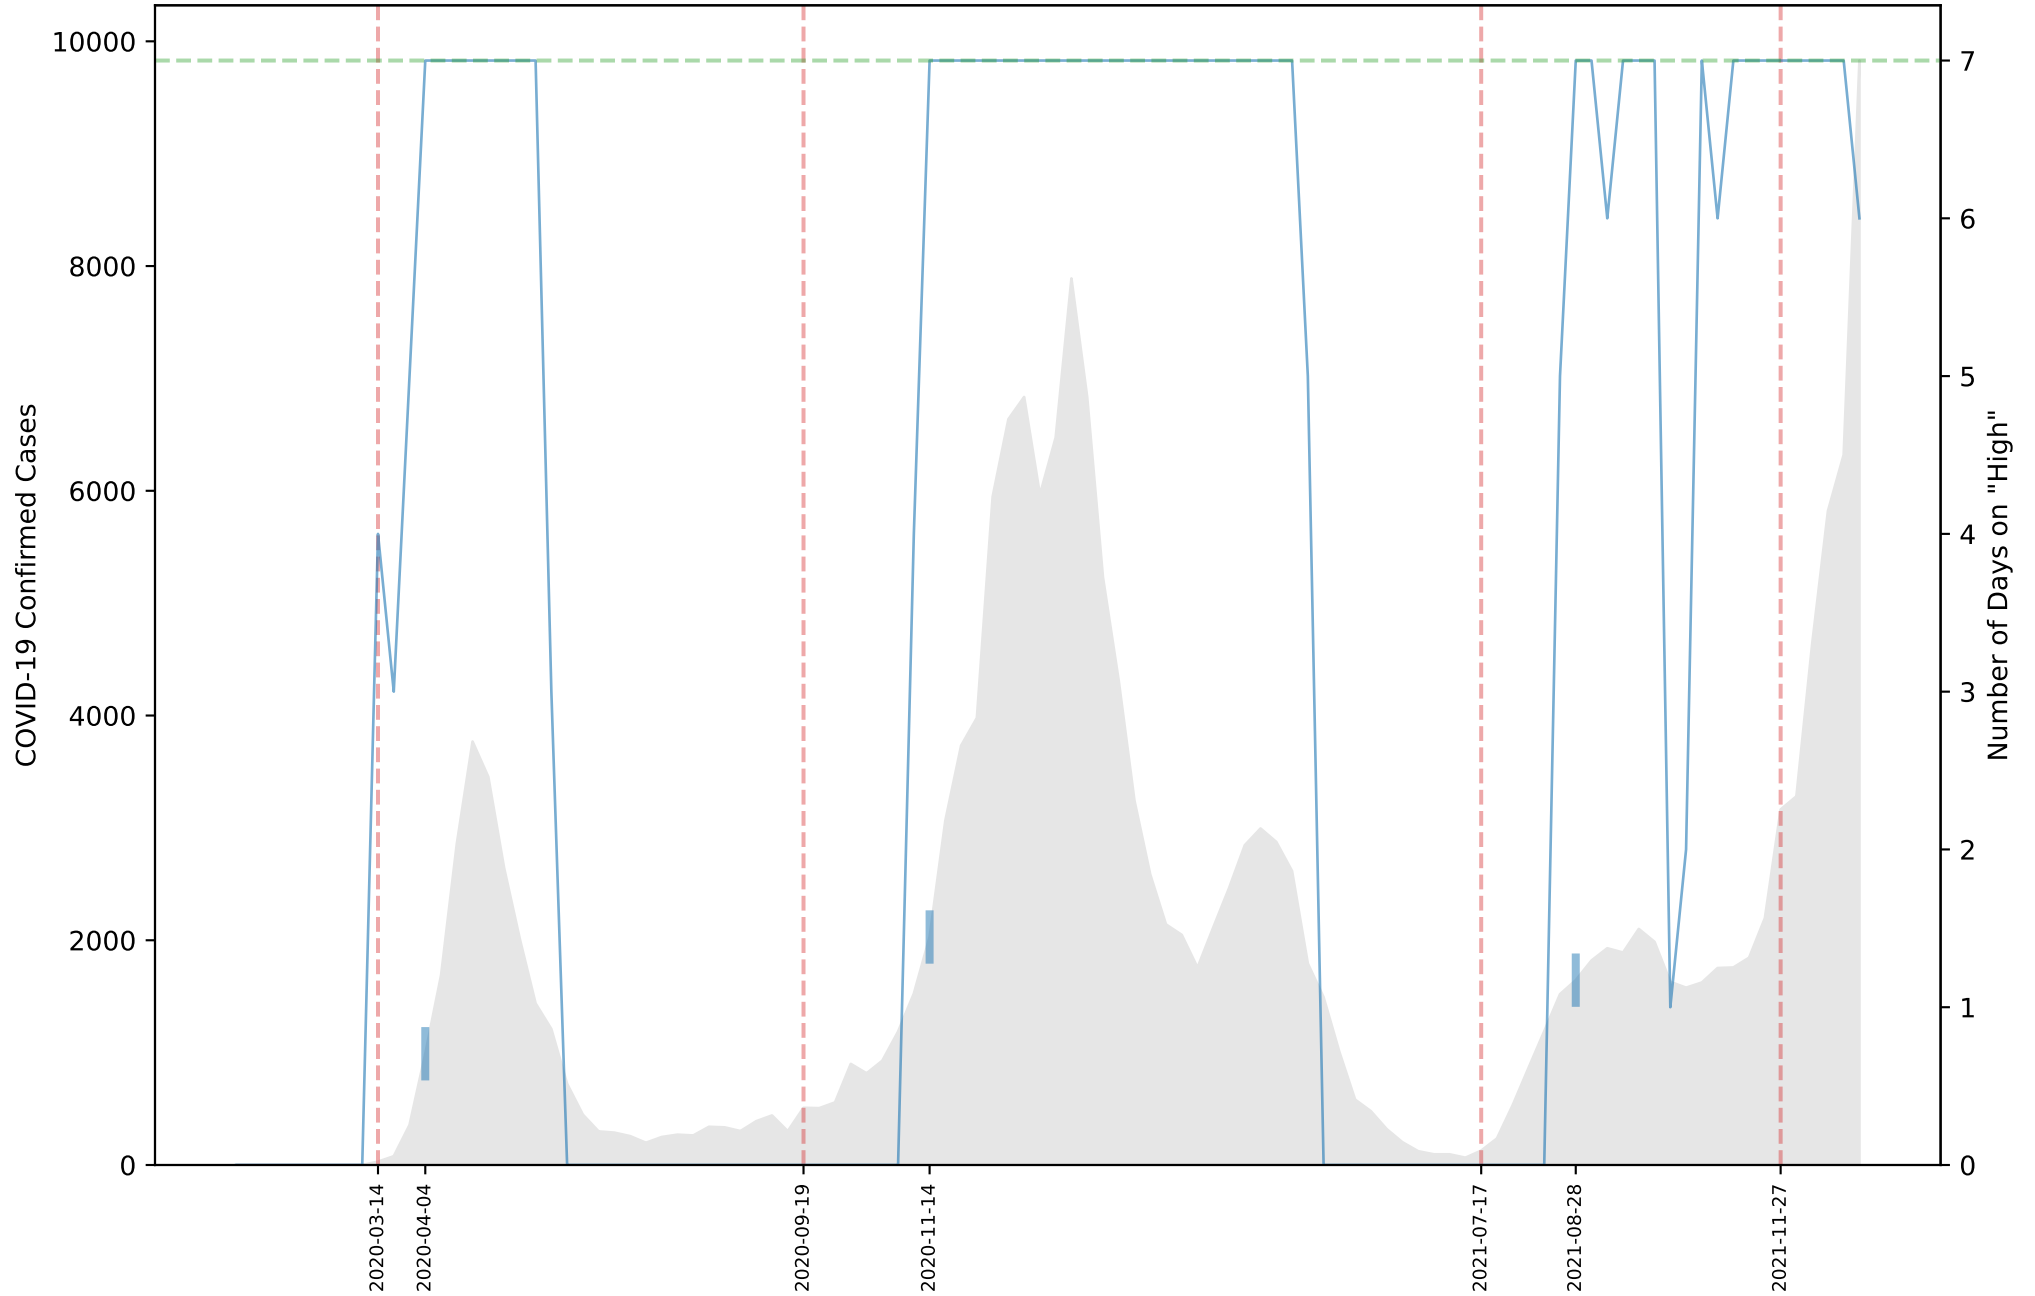

- Number of days on 'High' transmission per week
- Threshold to mark the beginning of epidemic event for CDC signal
- CDC beginning of events
- $r_o$  (Parag's method)

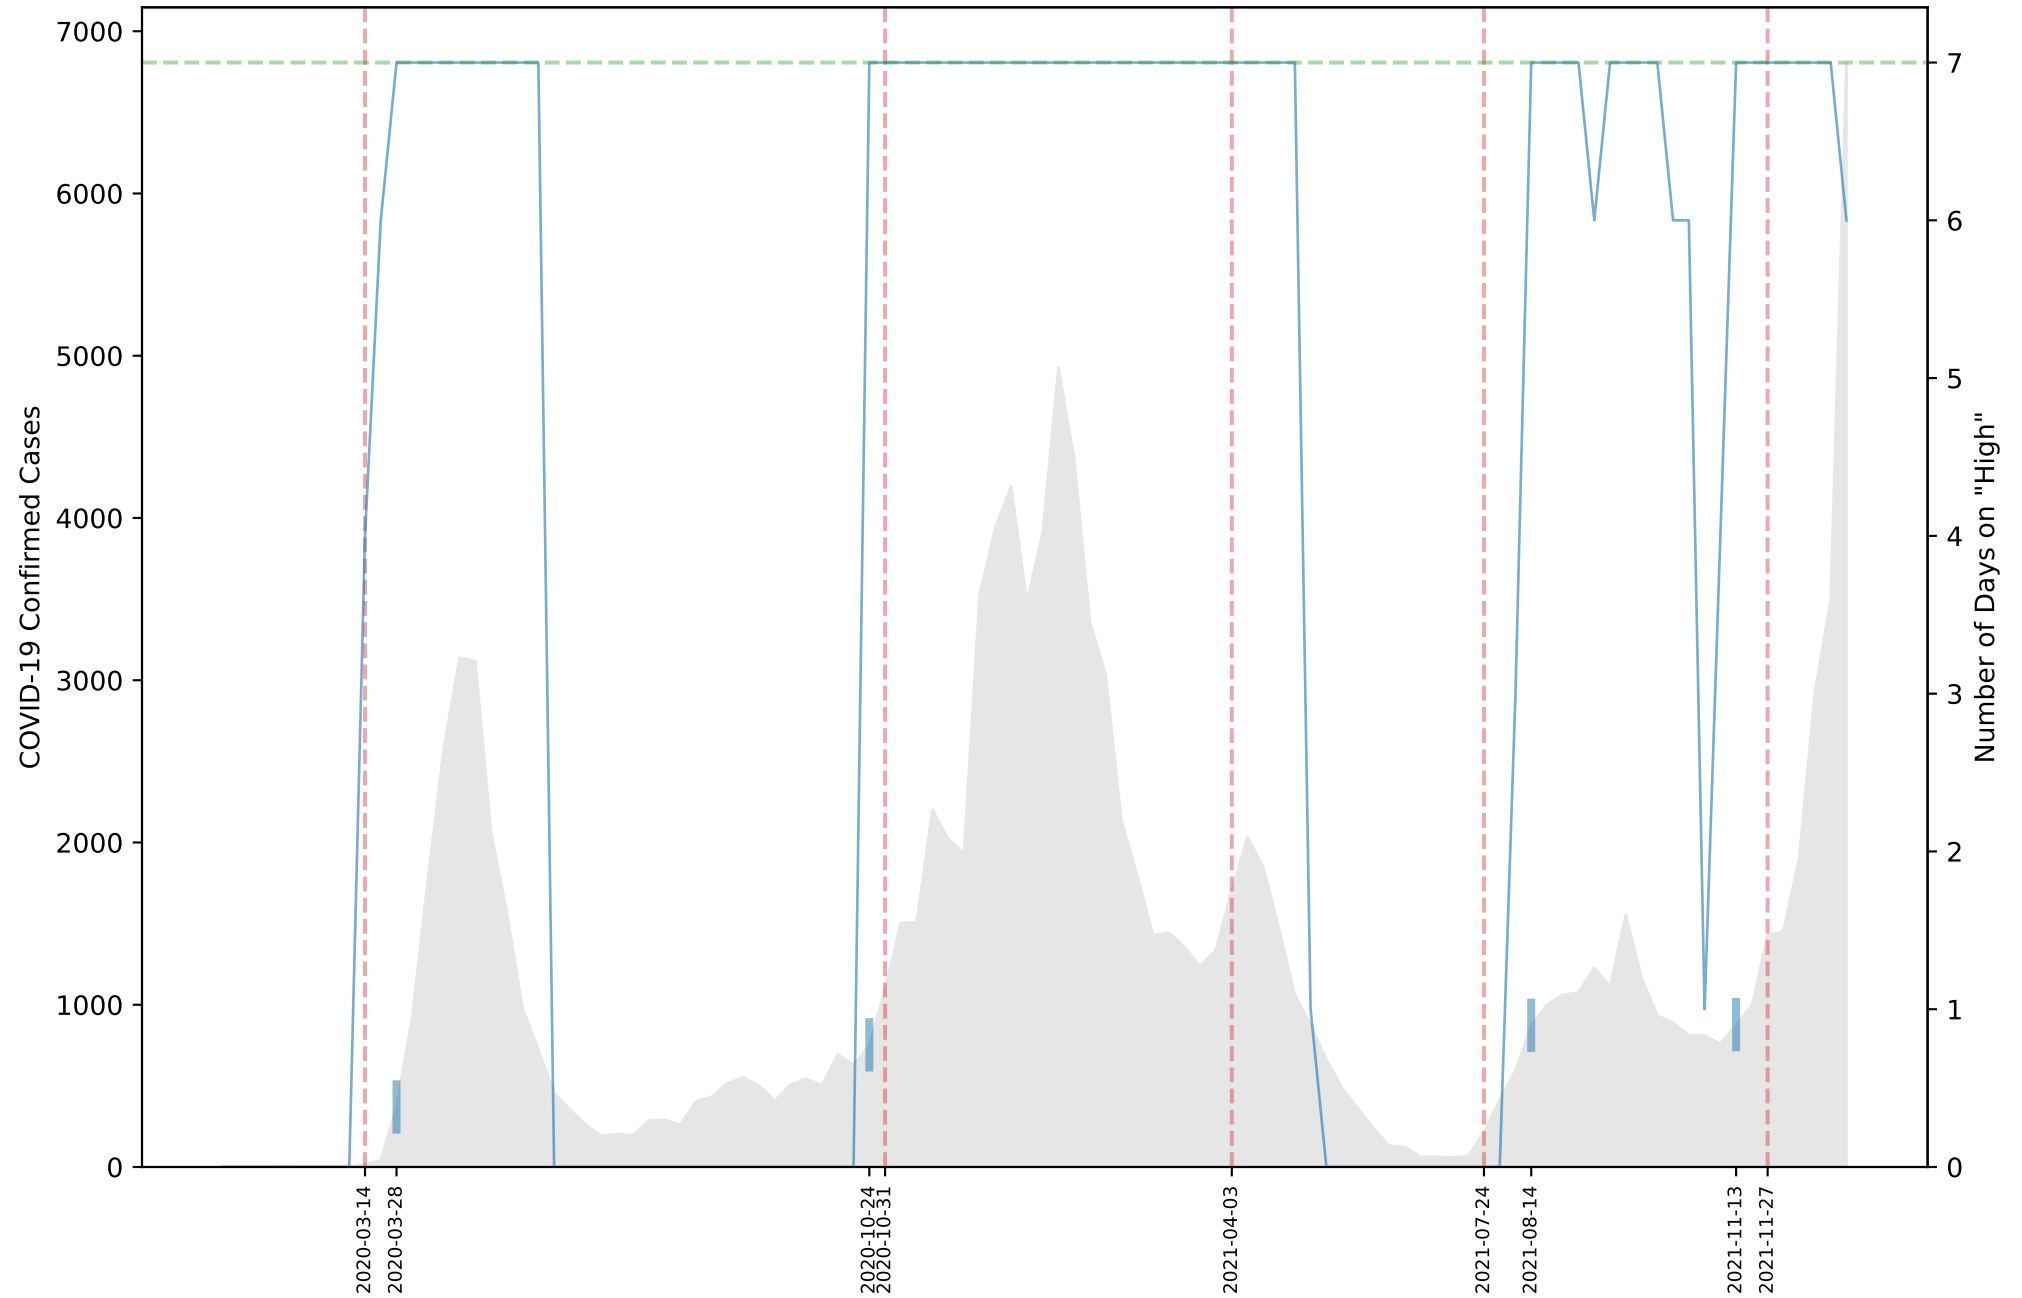



# MD, Baltimore

S231

- Number of days on 'High' transmission per week
- - - Threshold to mark the beginning of epidemic event for CDC signal
- █ CDC beginning of events
- - -  $r_o$  (Parag's method)

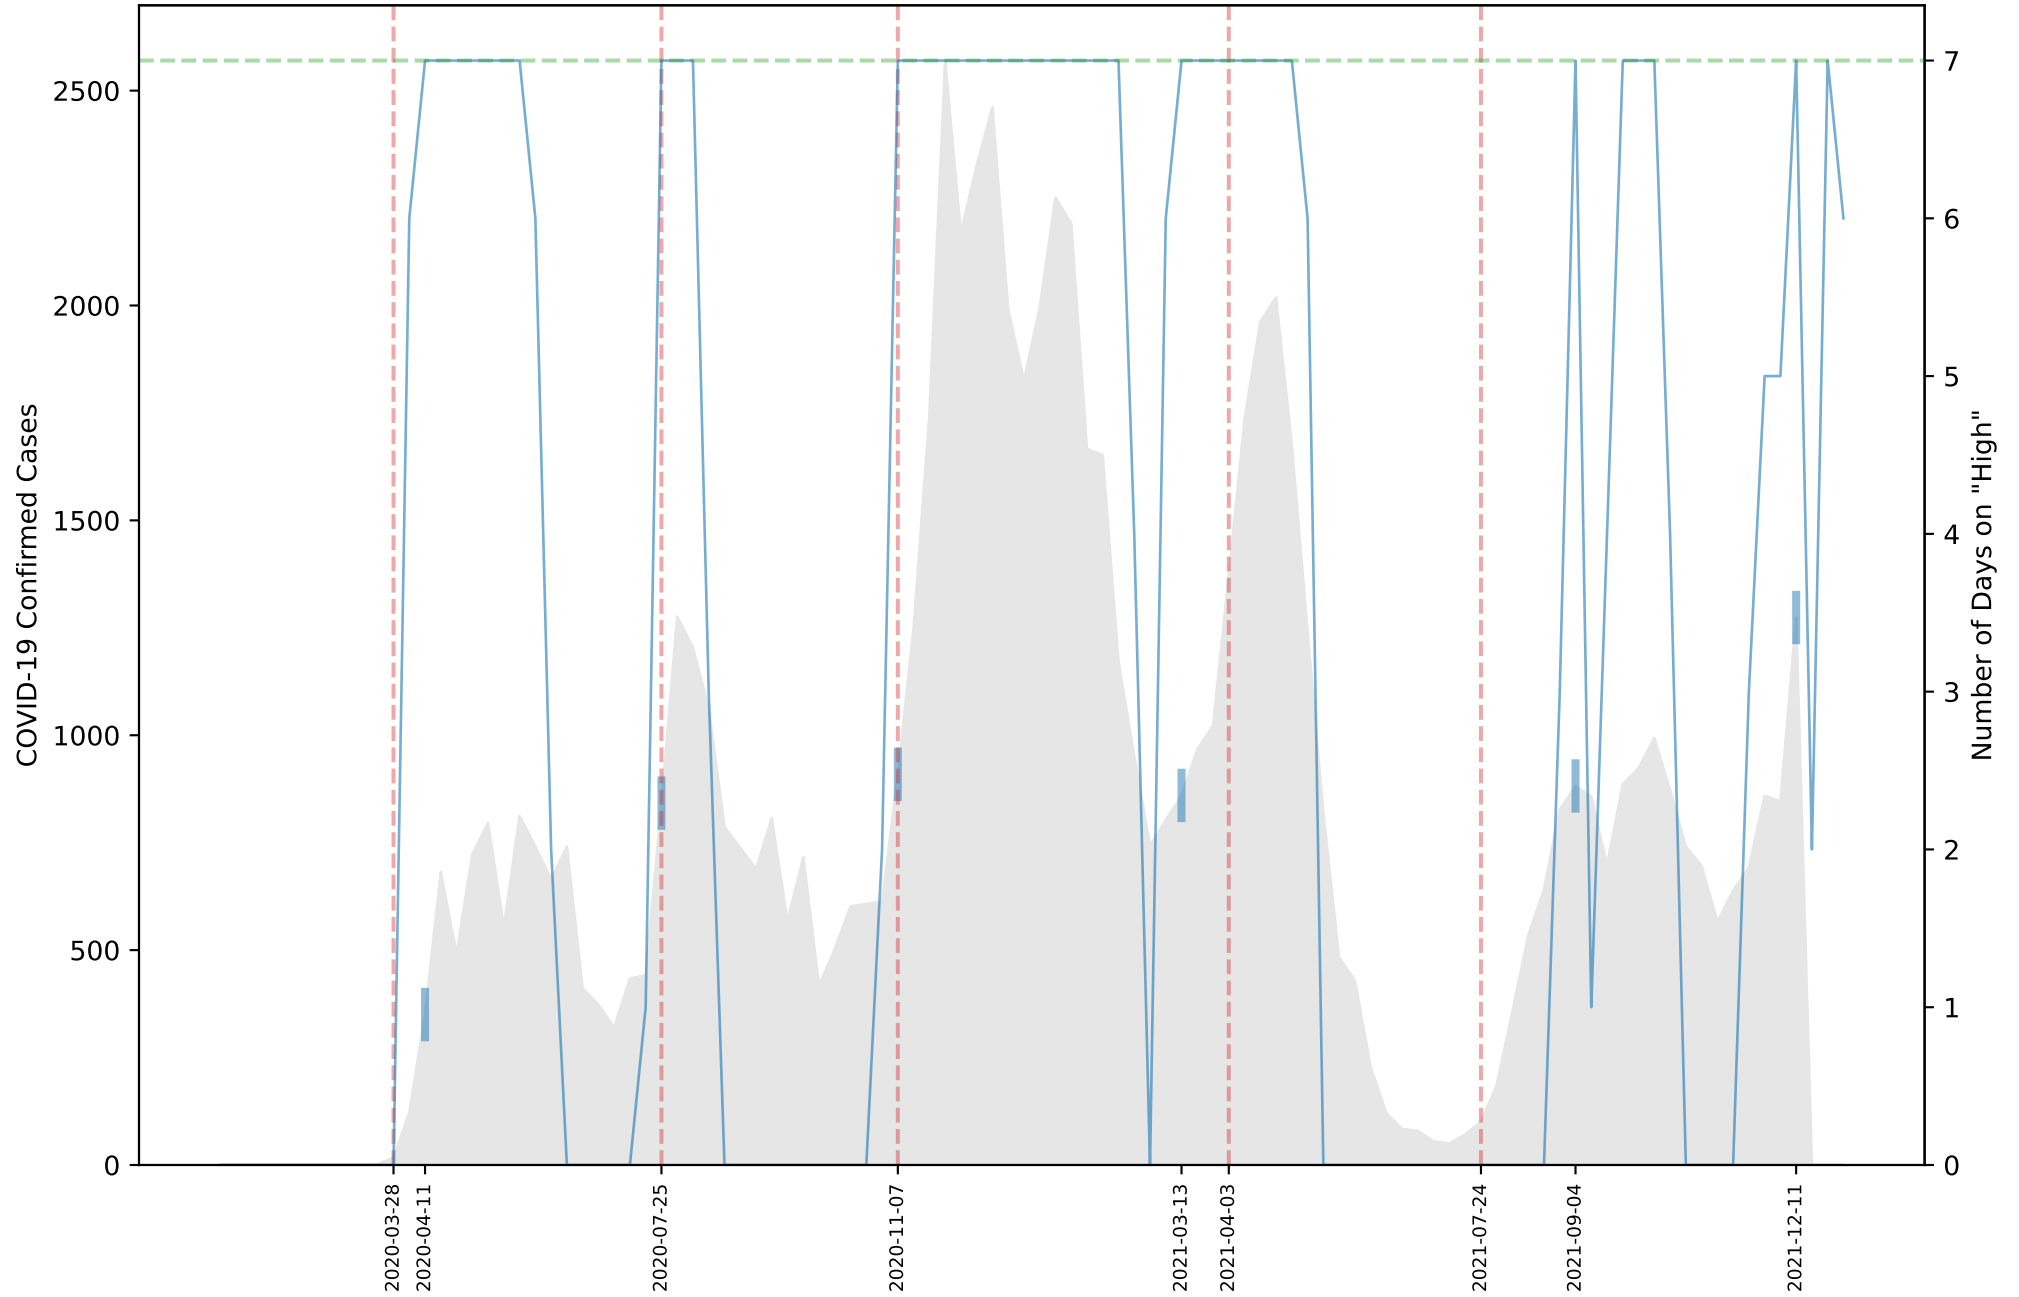

# MD, Montgomery

S232

- Number of days on 'High' transmission per week
- - - Threshold to mark the beginning of epidemic event for CDC signal
- █ CDC beginning of events
- - -  $r_o$  (Parag's method)

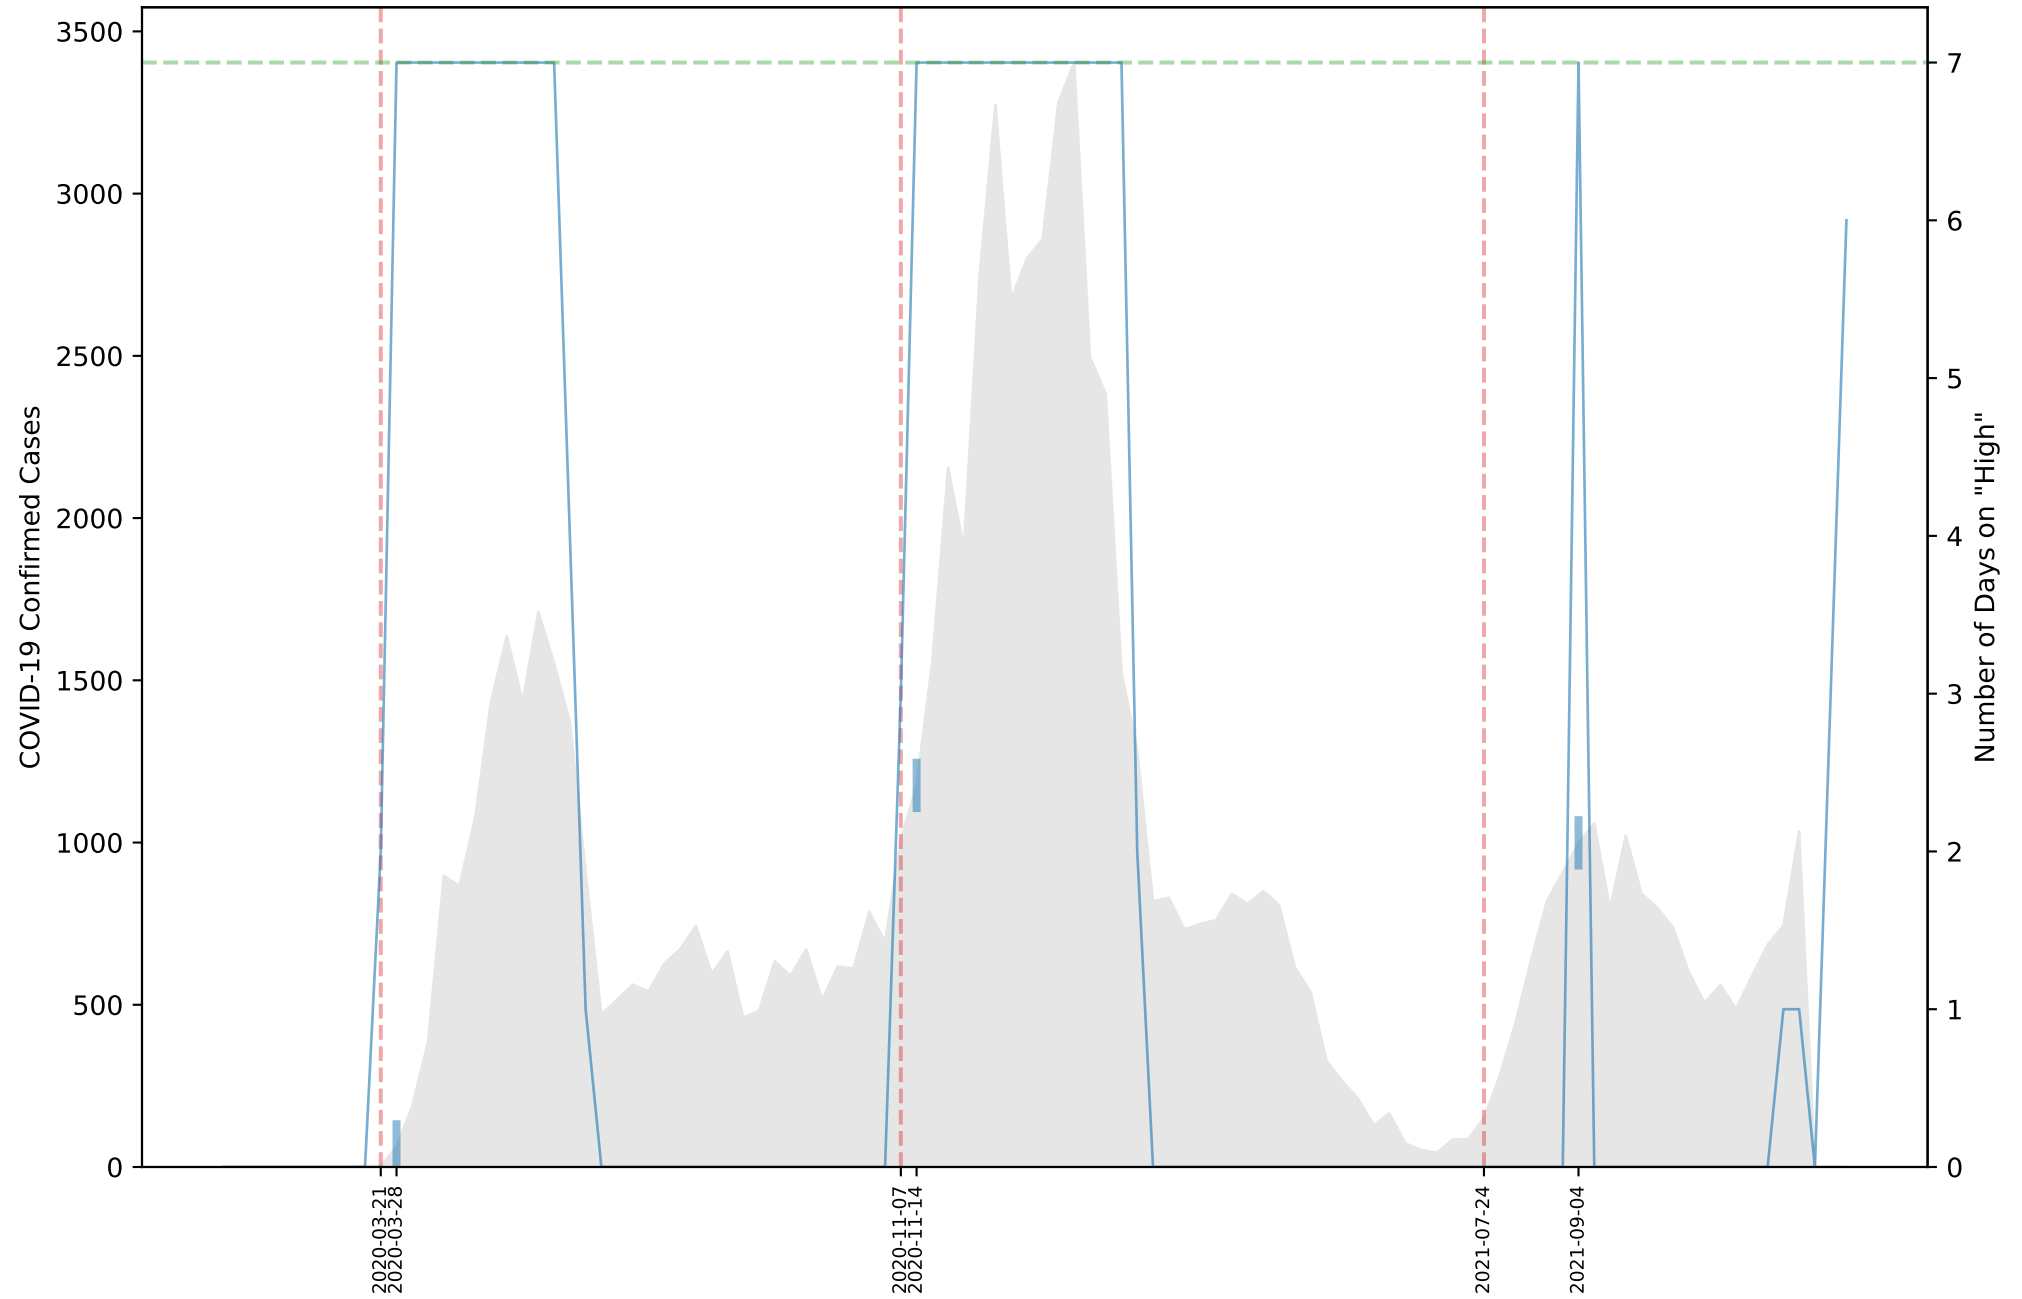

- Number of days on 'High' transmission per week
- Threshold to mark the beginning of epidemic event for CDC signal
- █ CDC beginning of events
- - -  $r_o$  (Parag's method)

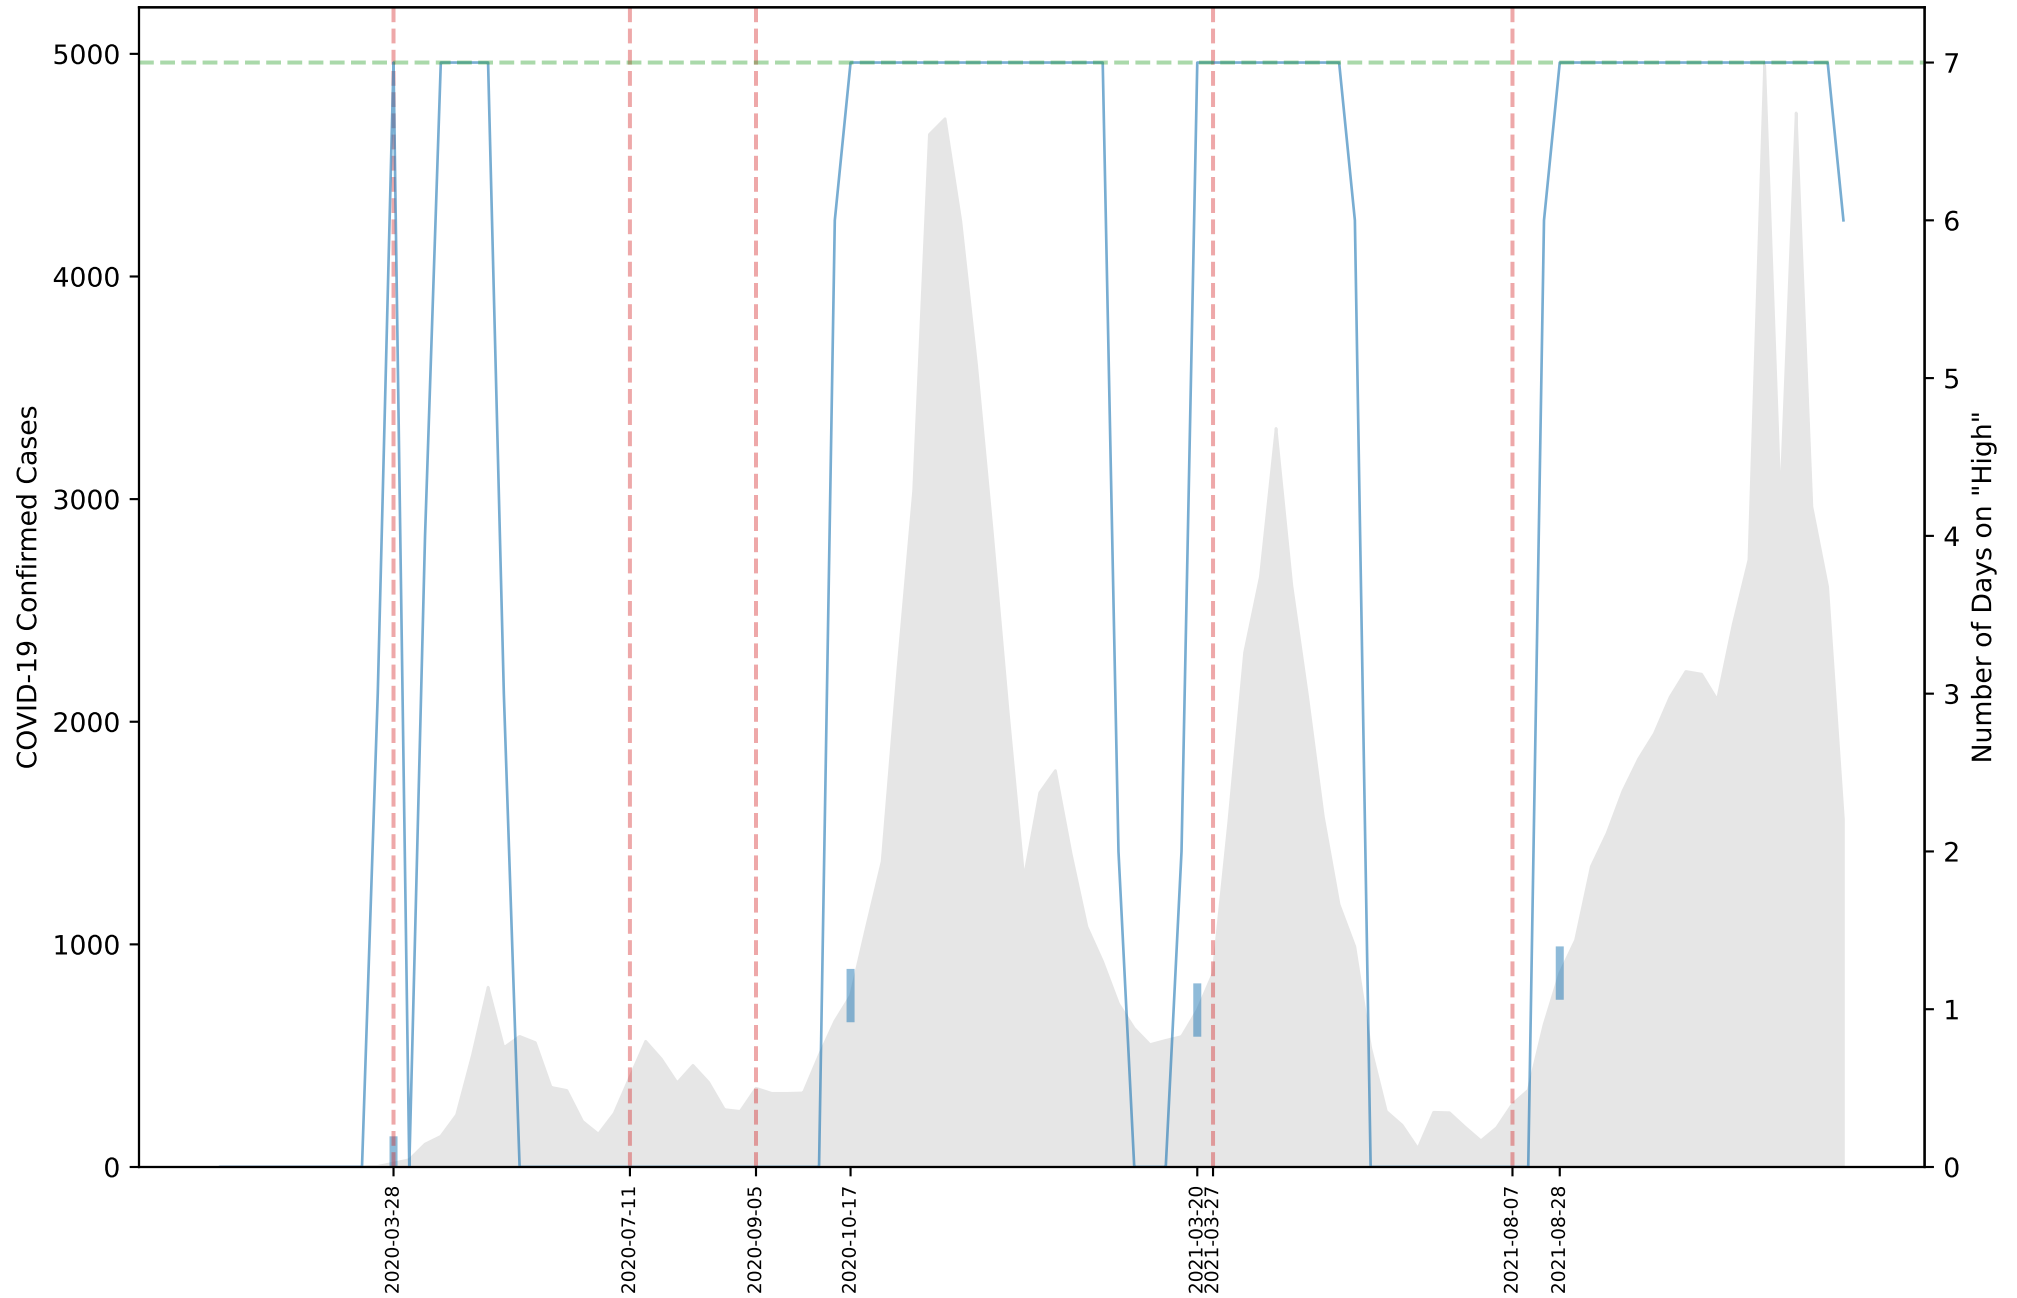

- Number of days on 'High' transmission per week
- - - Threshold to mark the beginning of epidemic event for CDC signal
- █ CDC beginning of events
- - -  $r_o$  (Parag's method)

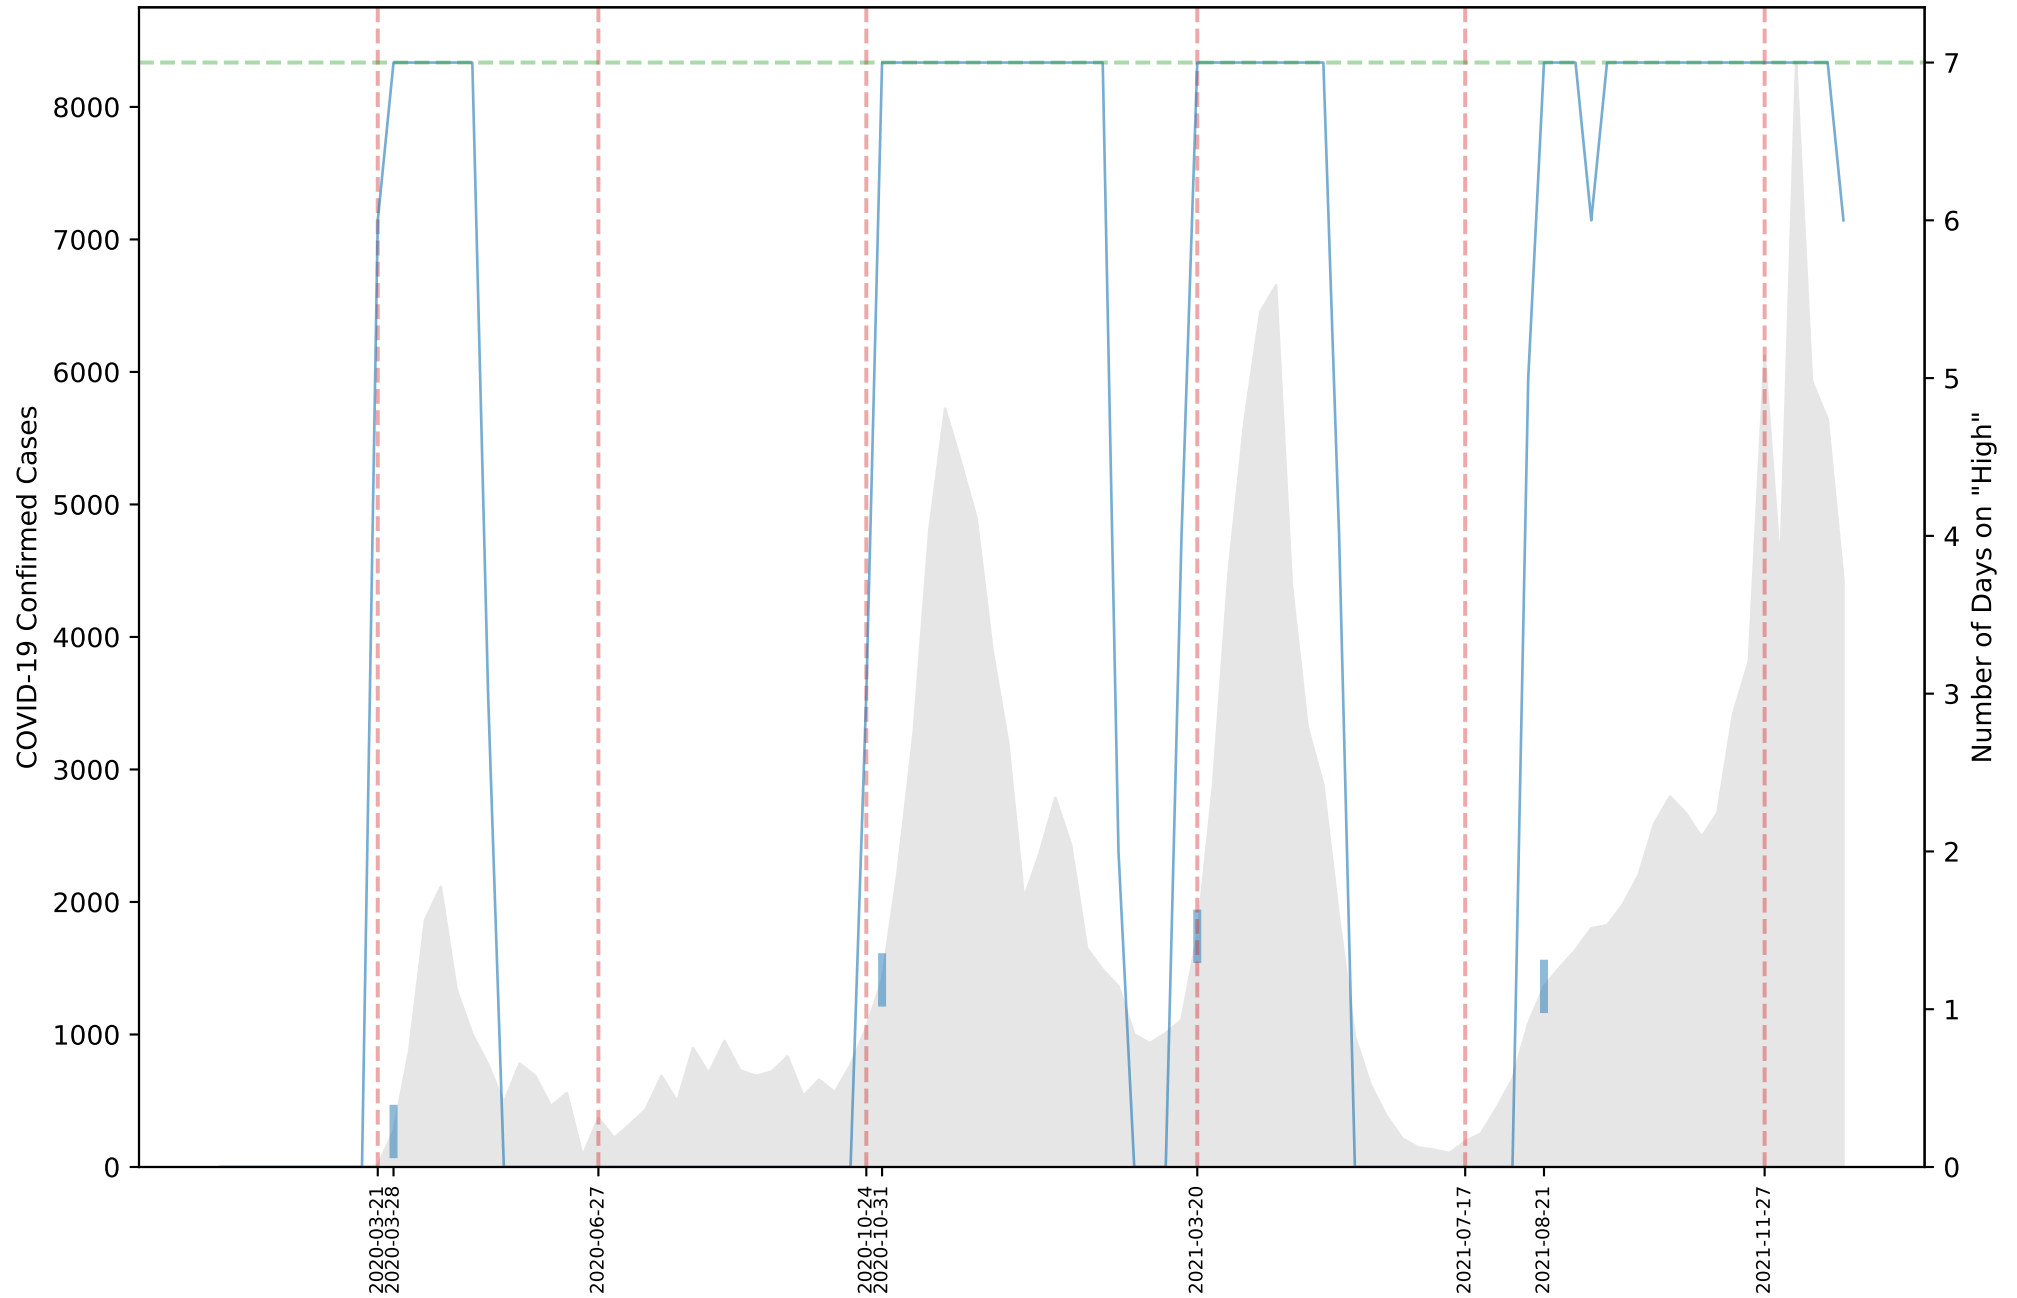

- Number of days on 'High' transmission per week
- - - Threshold to mark the beginning of epidemic event for CDC signal
- CDC beginning of events
- - -  $r_o$  (Parag's method)

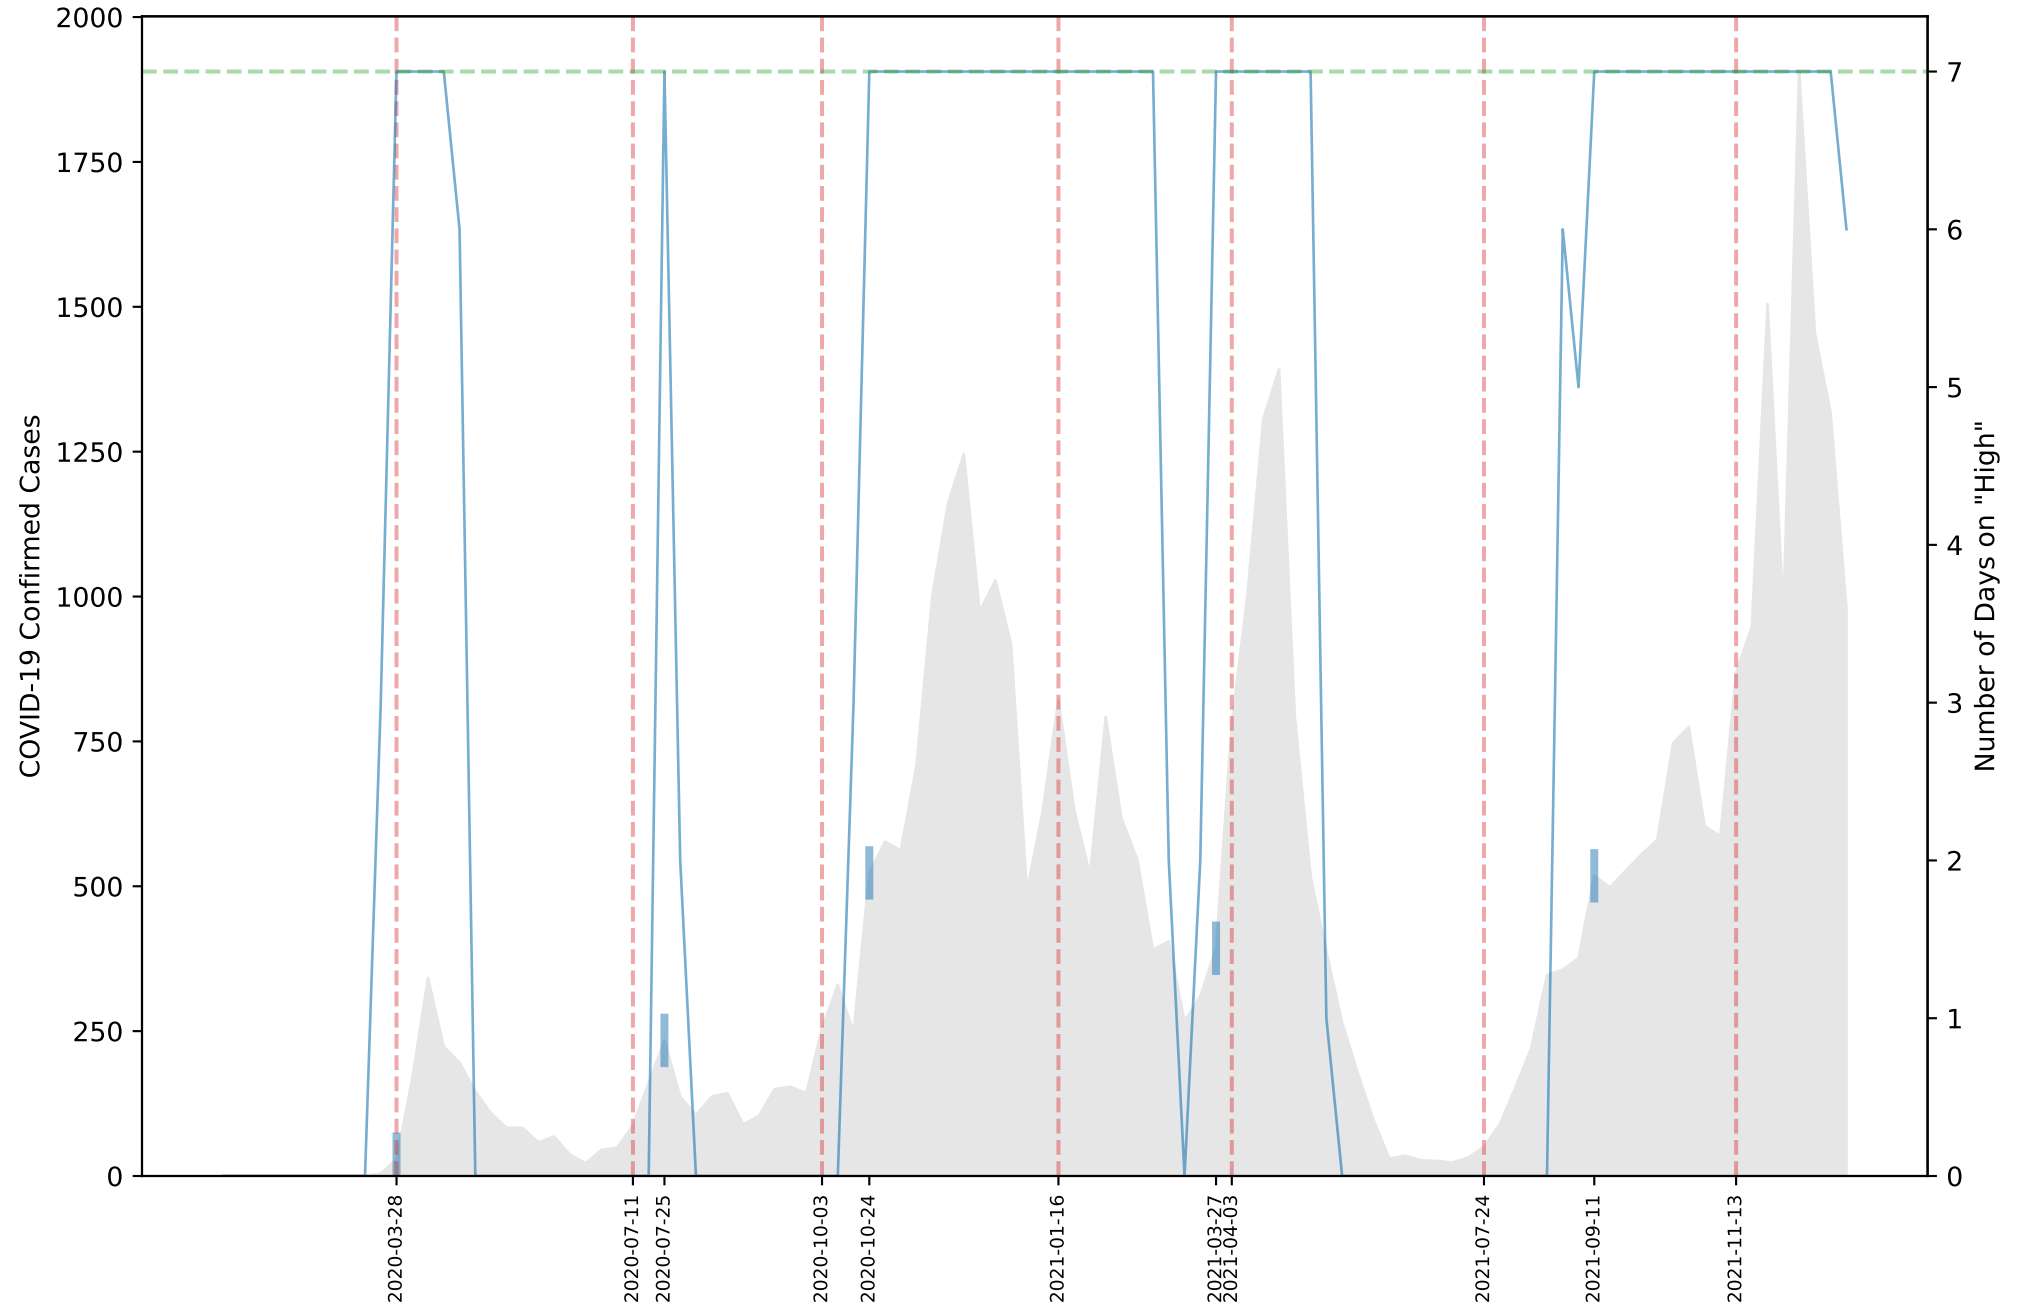

- Number of days on 'High' transmission per week
- - - Threshold to mark the beginning of epidemic event for CDC signal
- █ CDC beginning of events
- - -  $r_o$  (Parag's method)

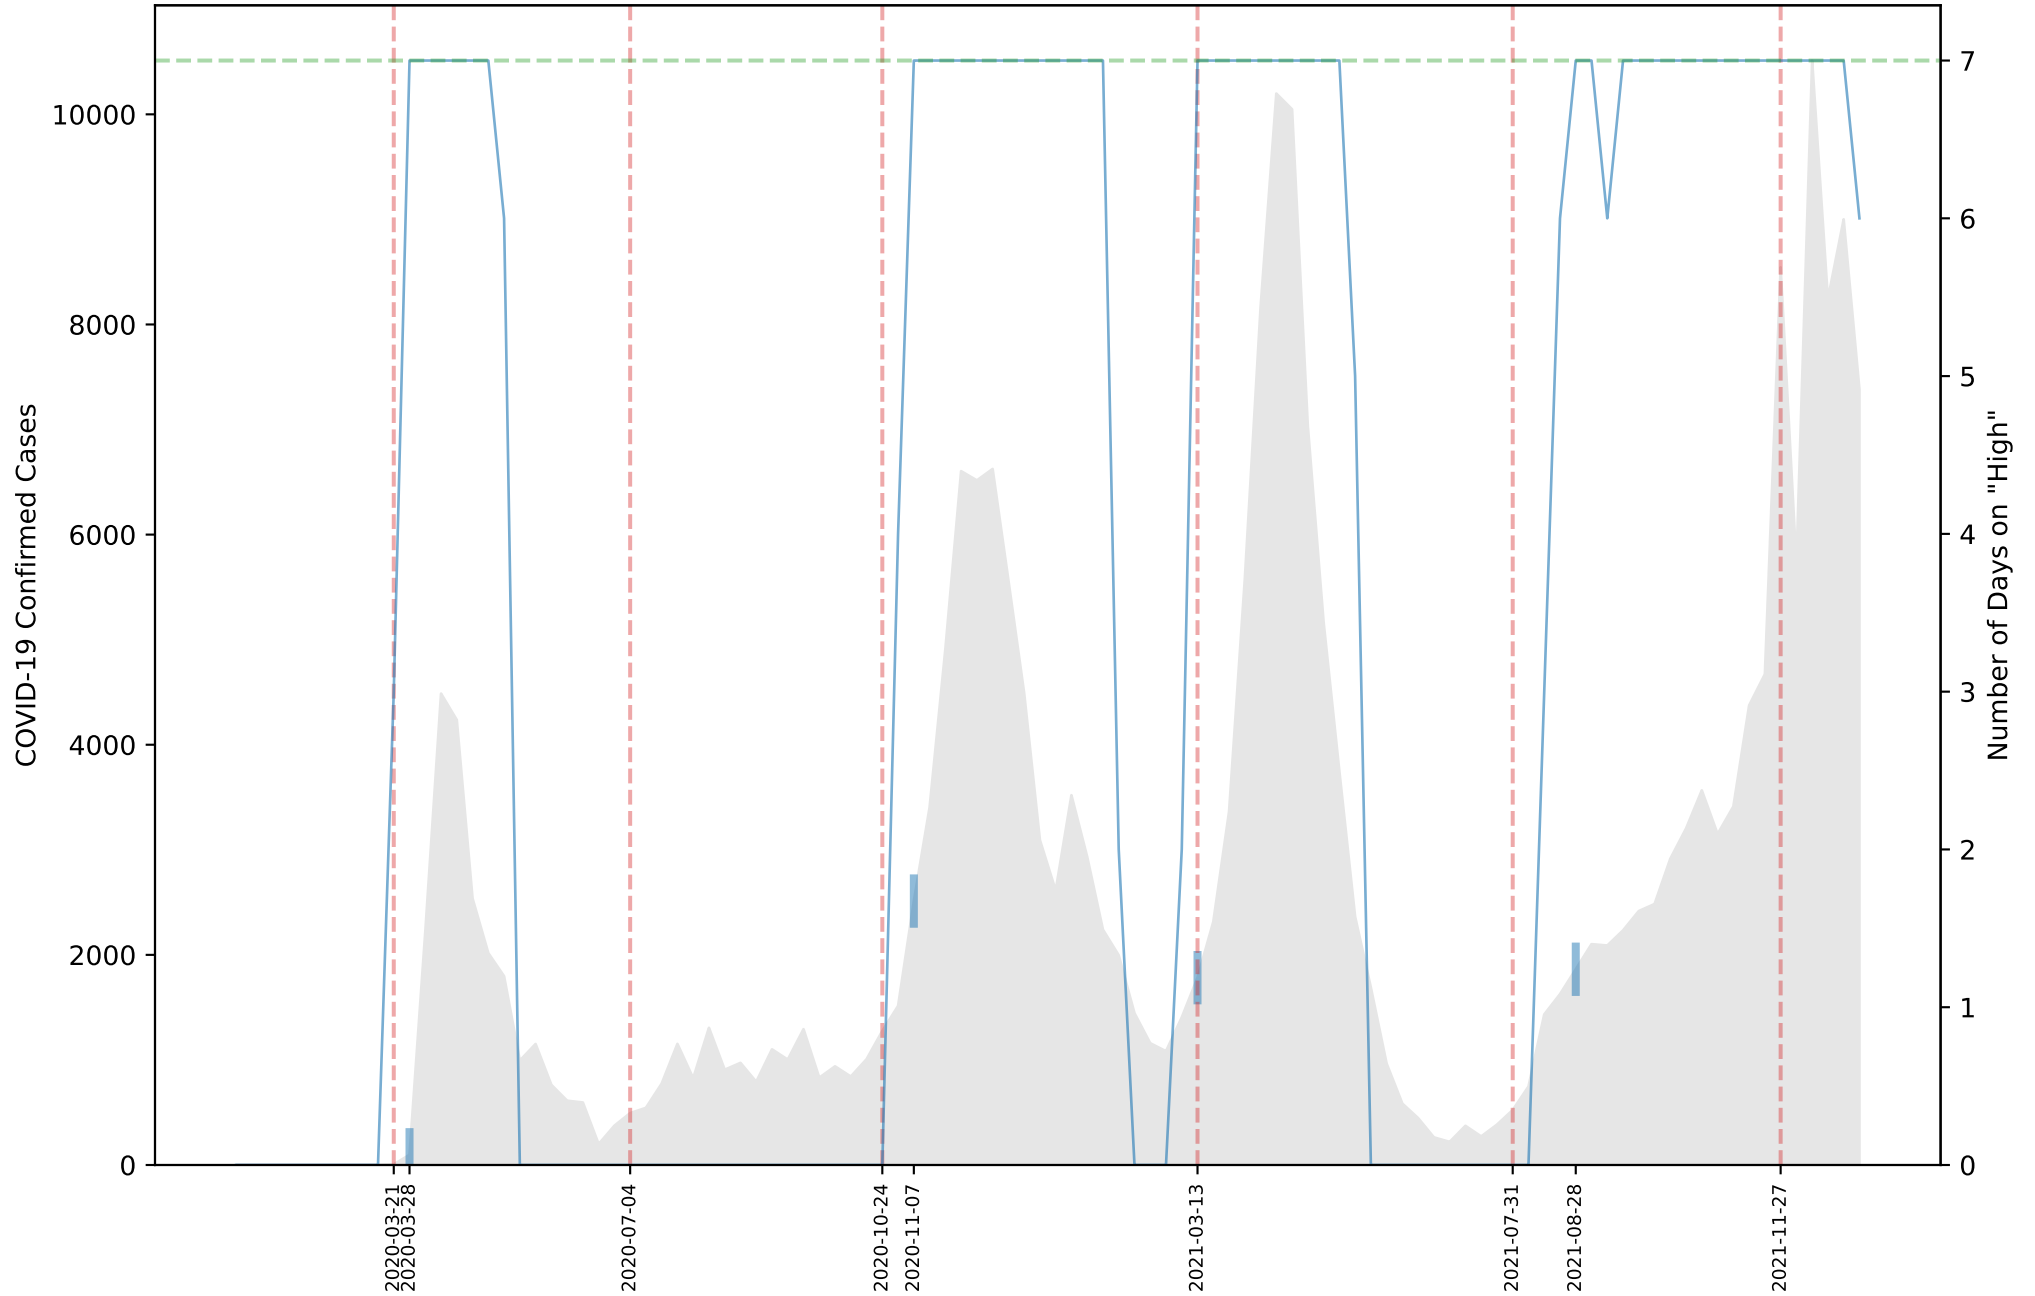

- Number of days on 'High' transmission per week
- - - Threshold to mark the beginning of epidemic event for CDC signal
- CDC beginning of events
- - -  $r_o$  (Parag's method)

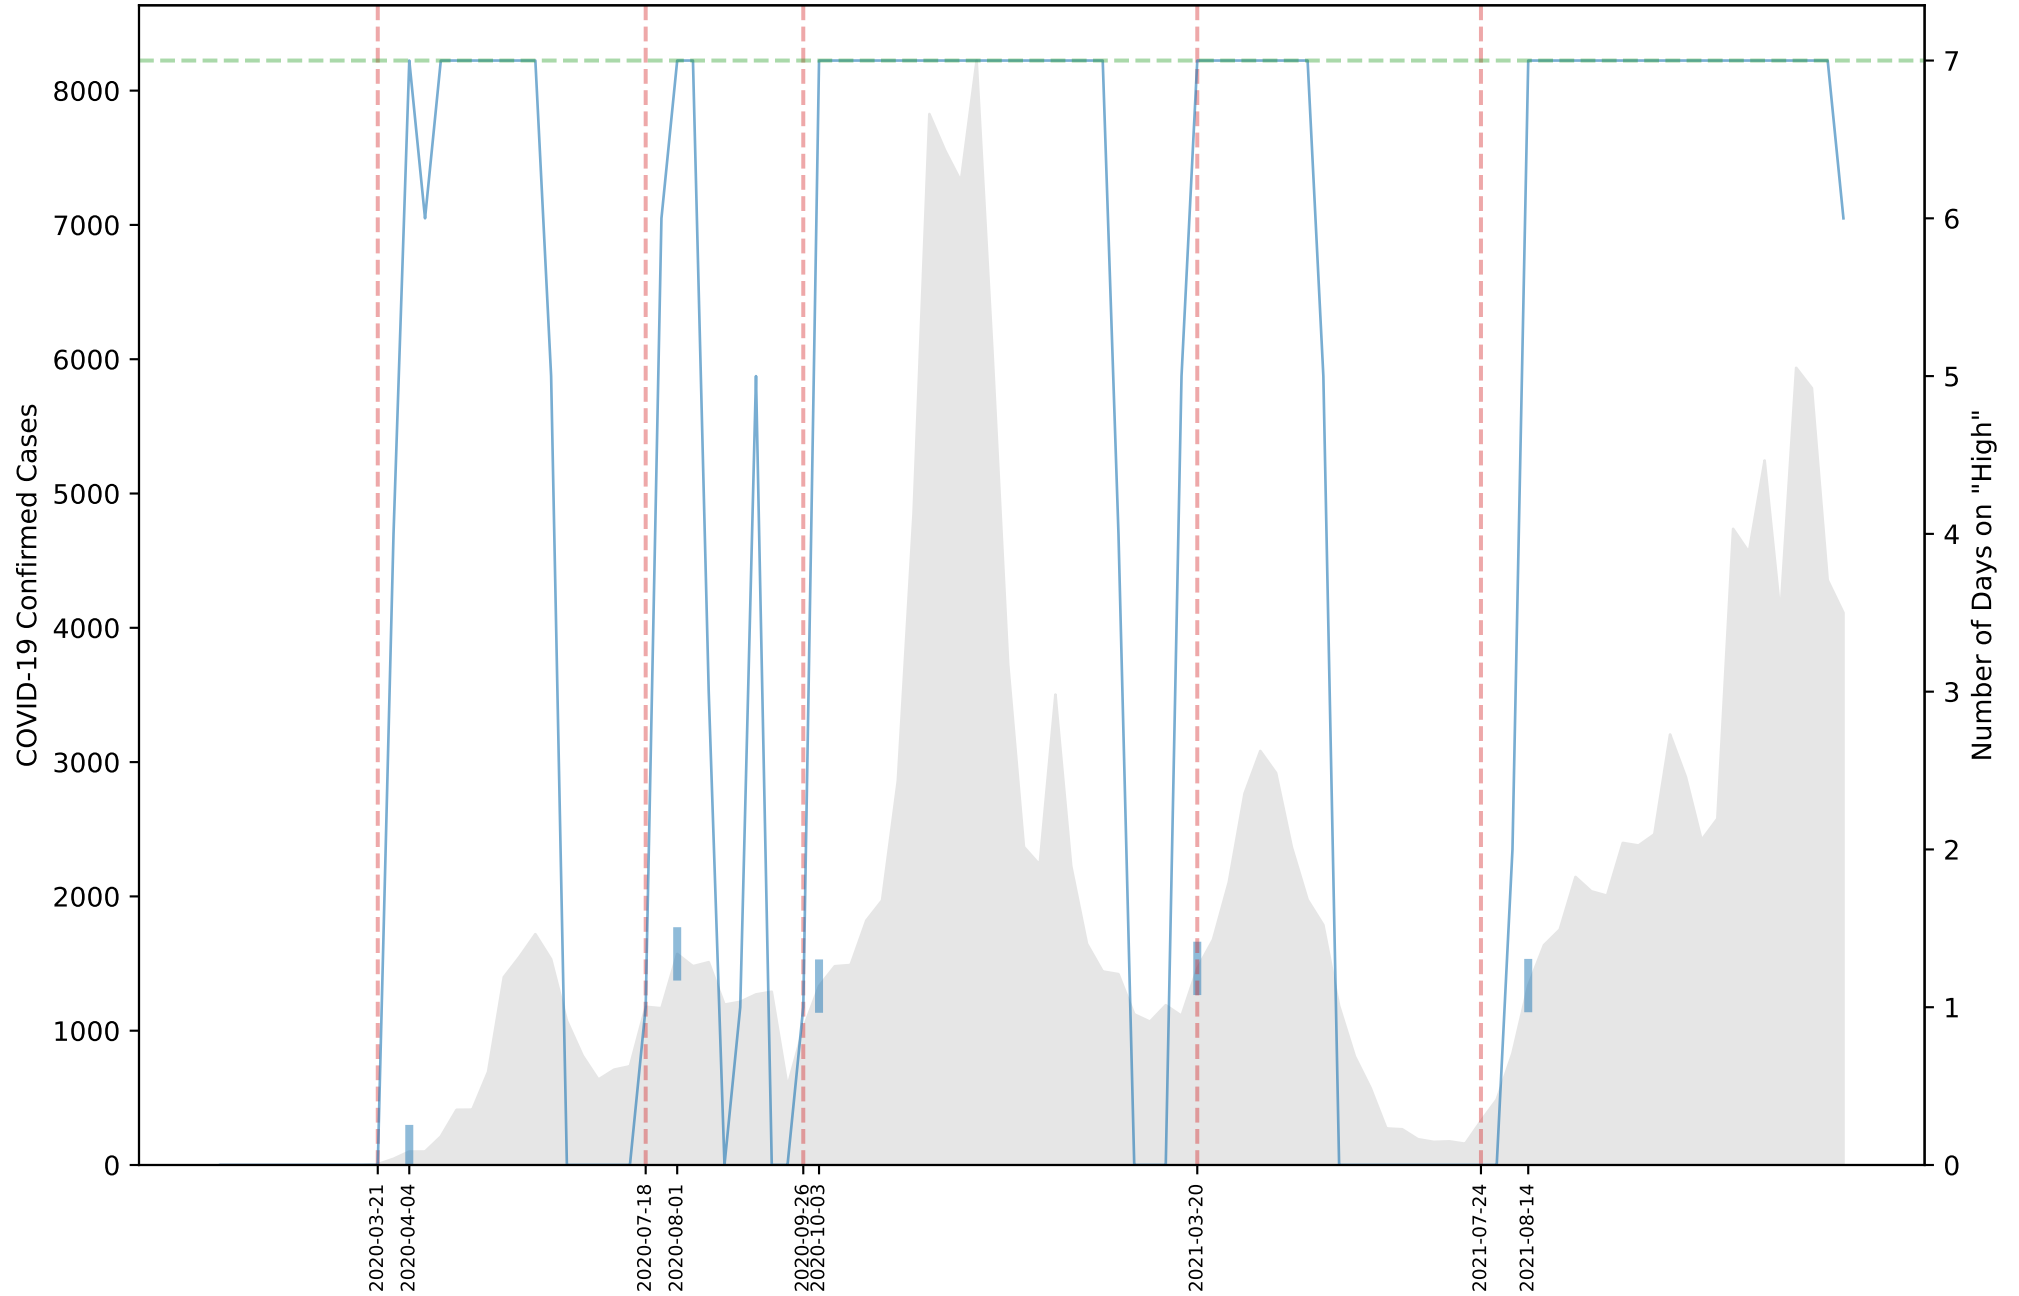

- Number of days on 'High' transmission per week
- - - Threshold to mark the beginning of epidemic event for CDC signal
- █ CDC beginning of events
- - -  $r_o$  (Parag's method)

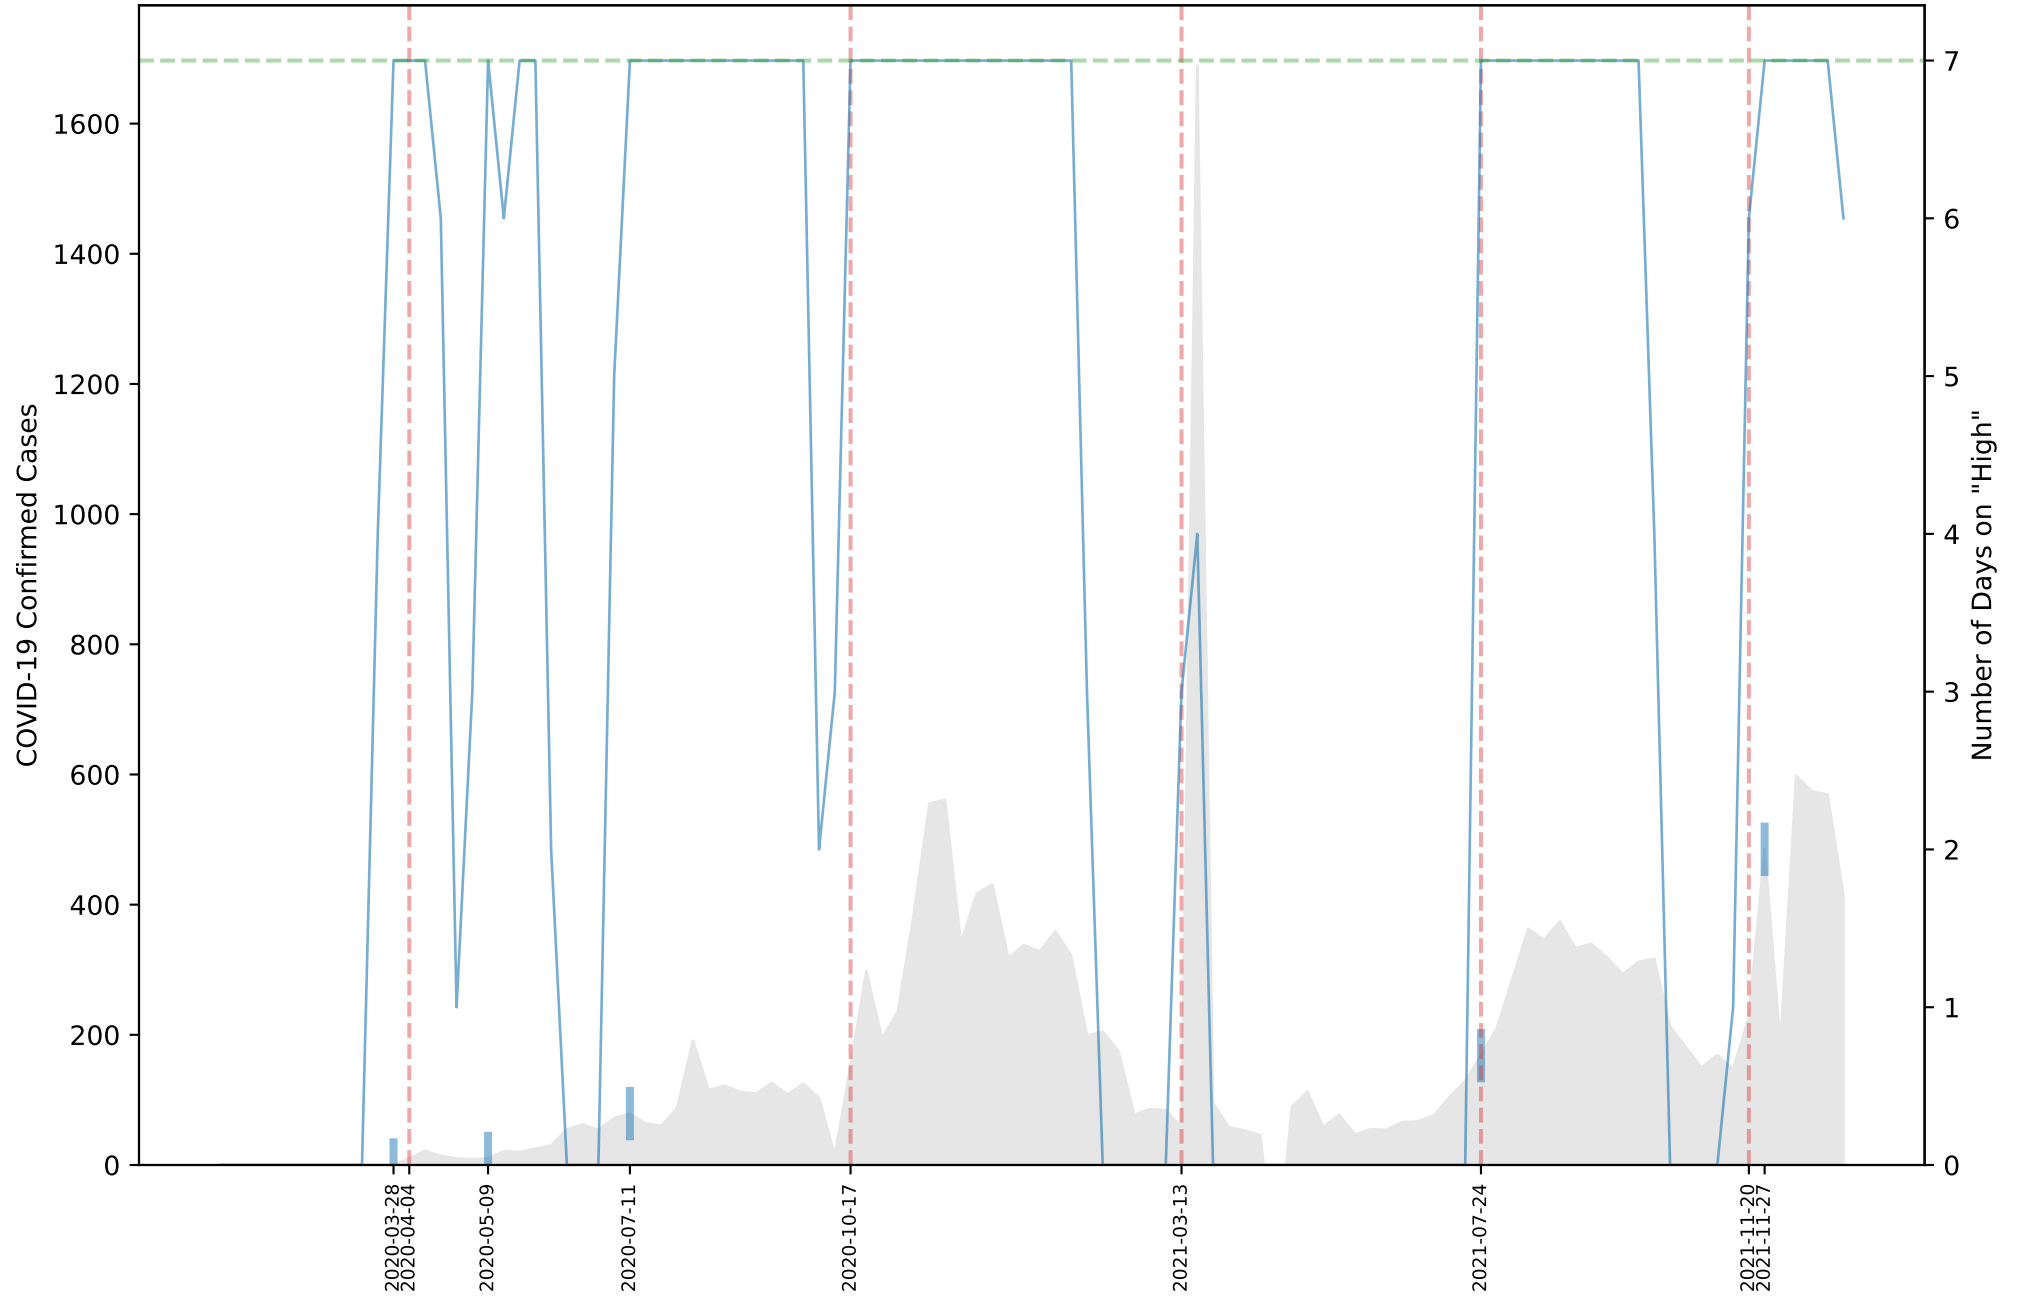



- Number of days on 'High' transmission per week
- - - Threshold to mark the beginning of epidemic event for CDC signal
- █ CDC beginning of events
- - -  $r_o$  (Parag's method)

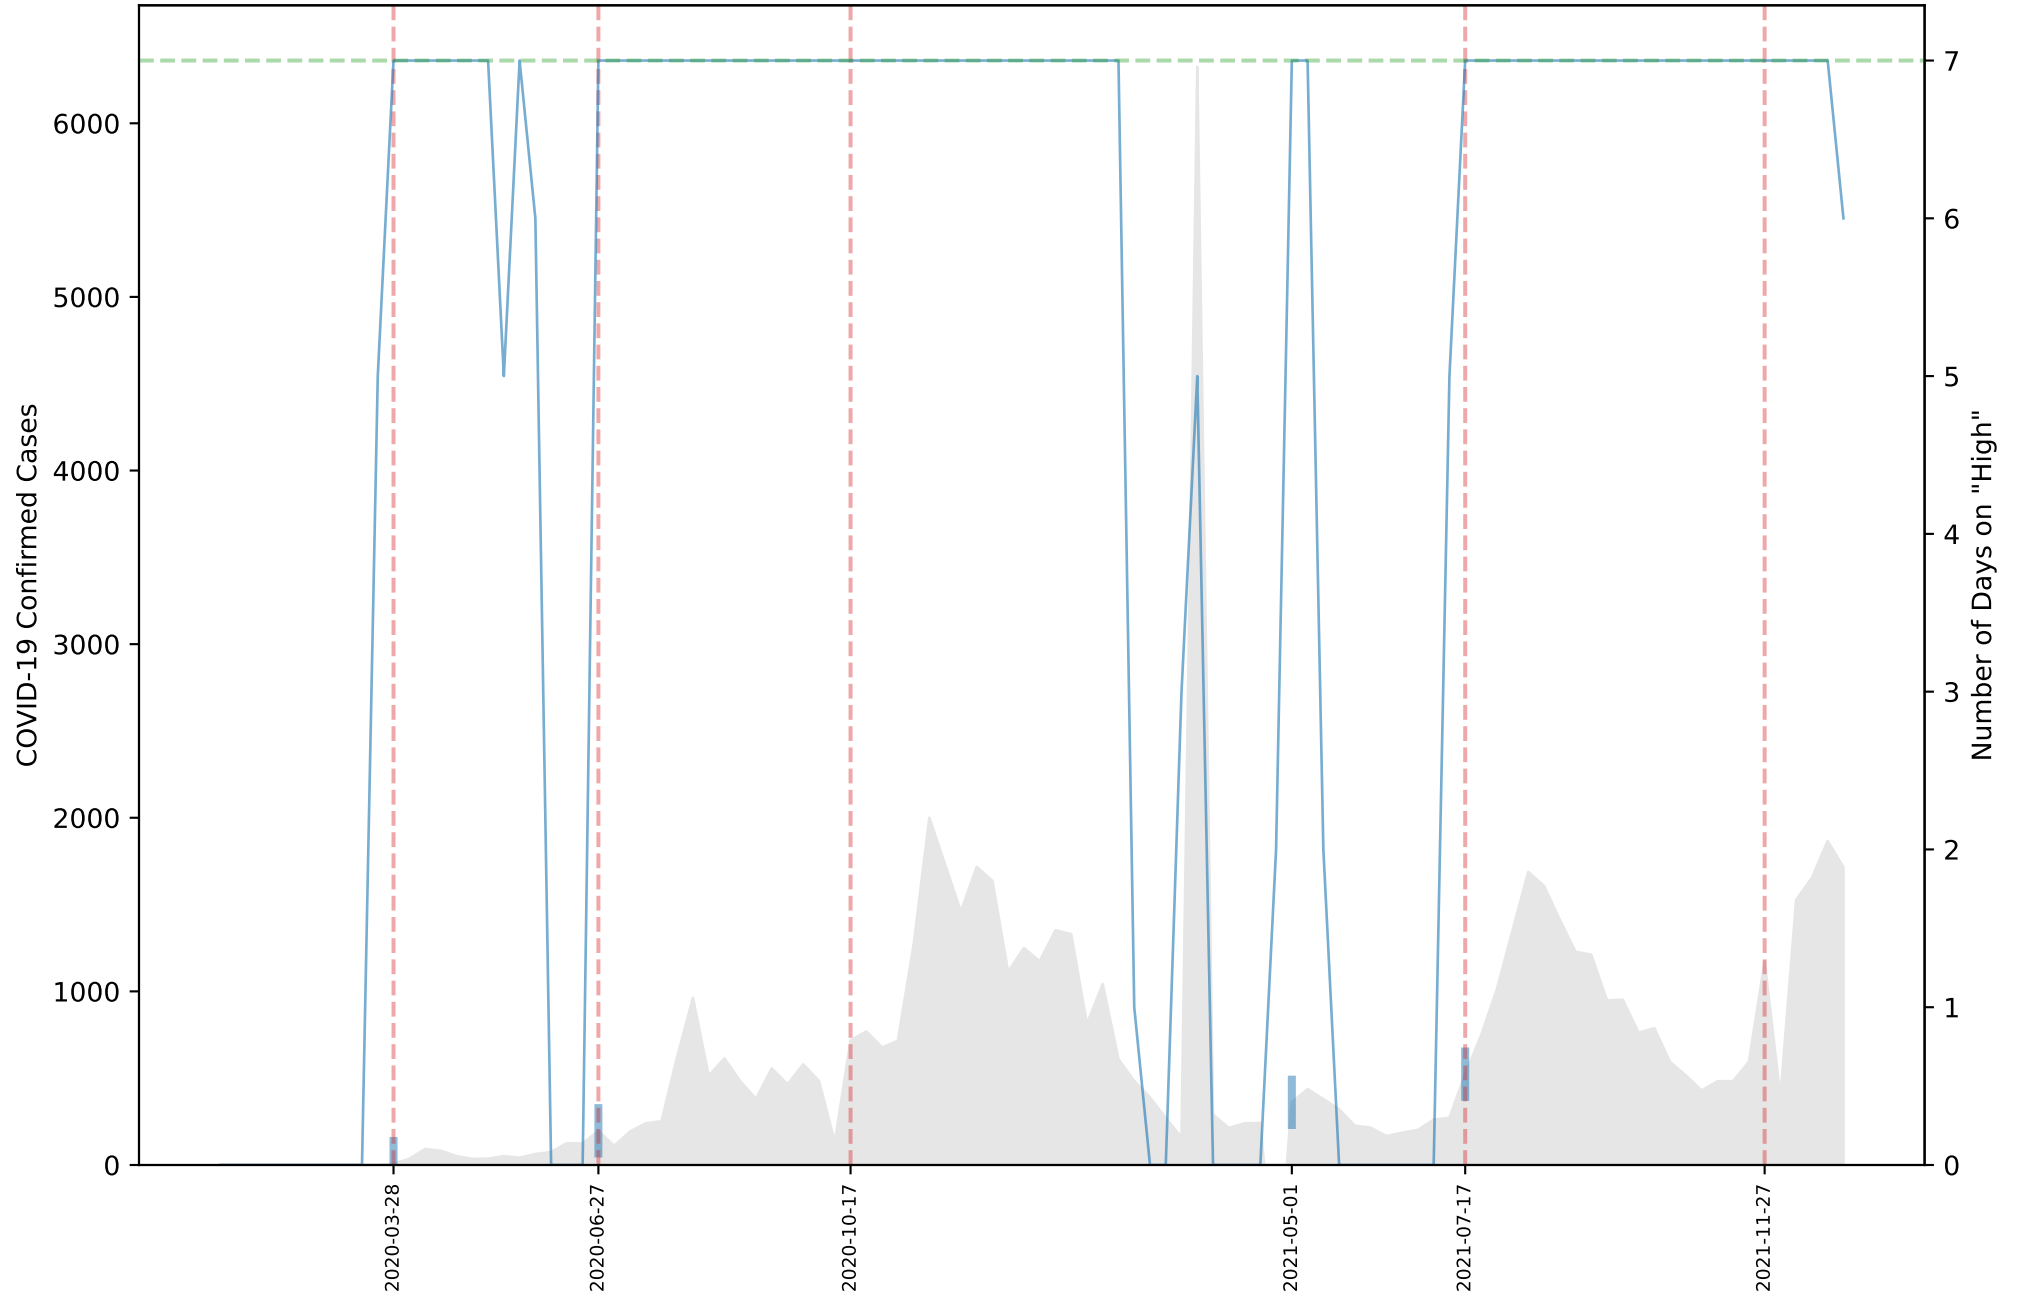

- Number of days on 'High' transmission per week
- - - Threshold to mark the beginning of epidemic event for CDC signal
- █ CDC beginning of events
- - -  $r_o$  (Parag's method)

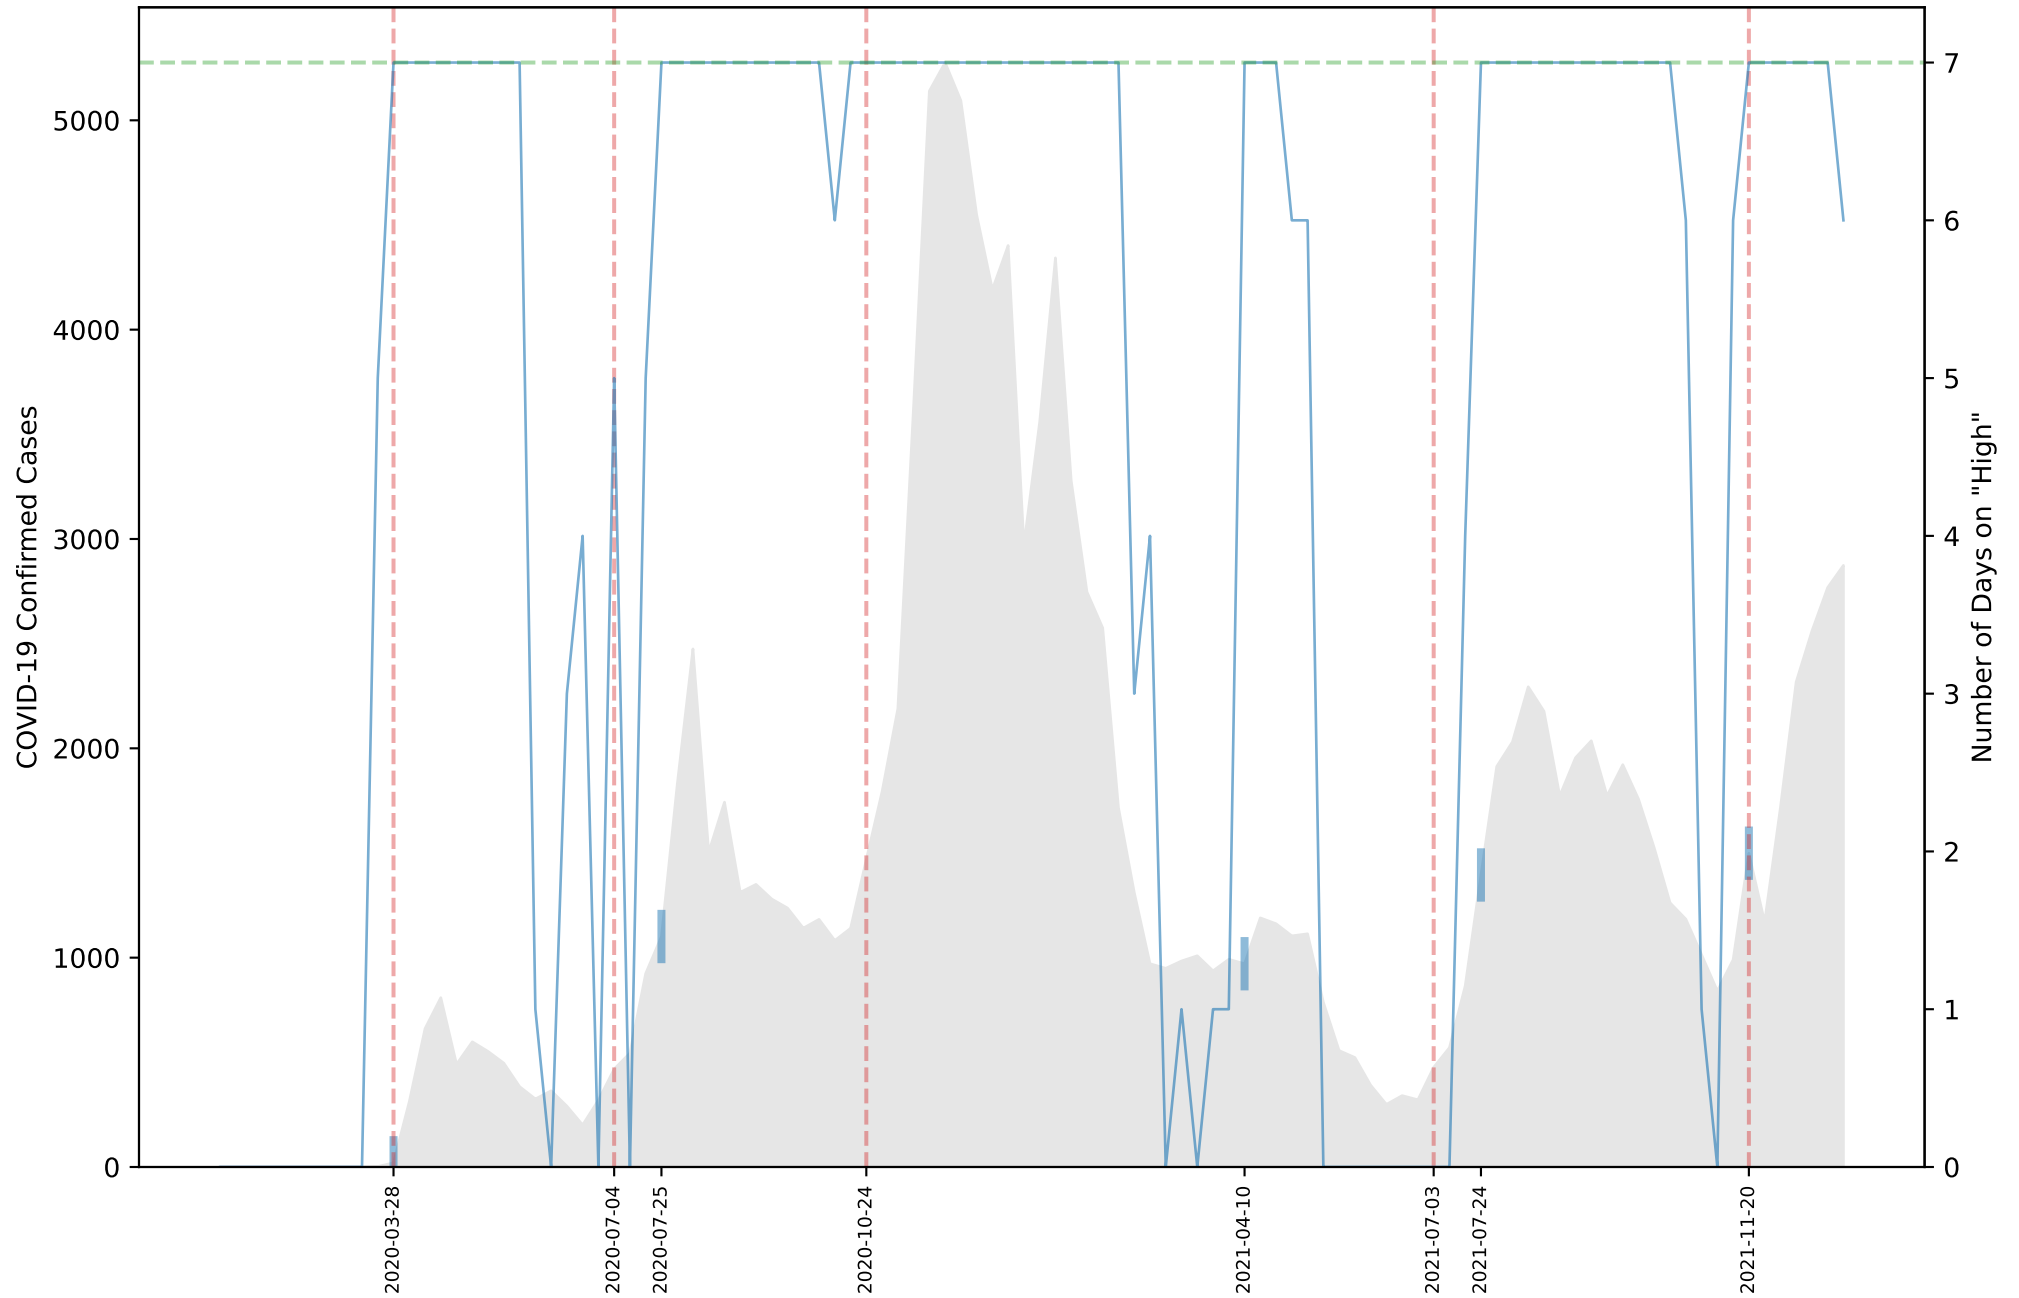

- Number of days on 'High' transmission per week
- - - Threshold to mark the beginning of epidemic event for CDC signal
- █ CDC beginning of events
- - -  $r_o$  (Parag's method)

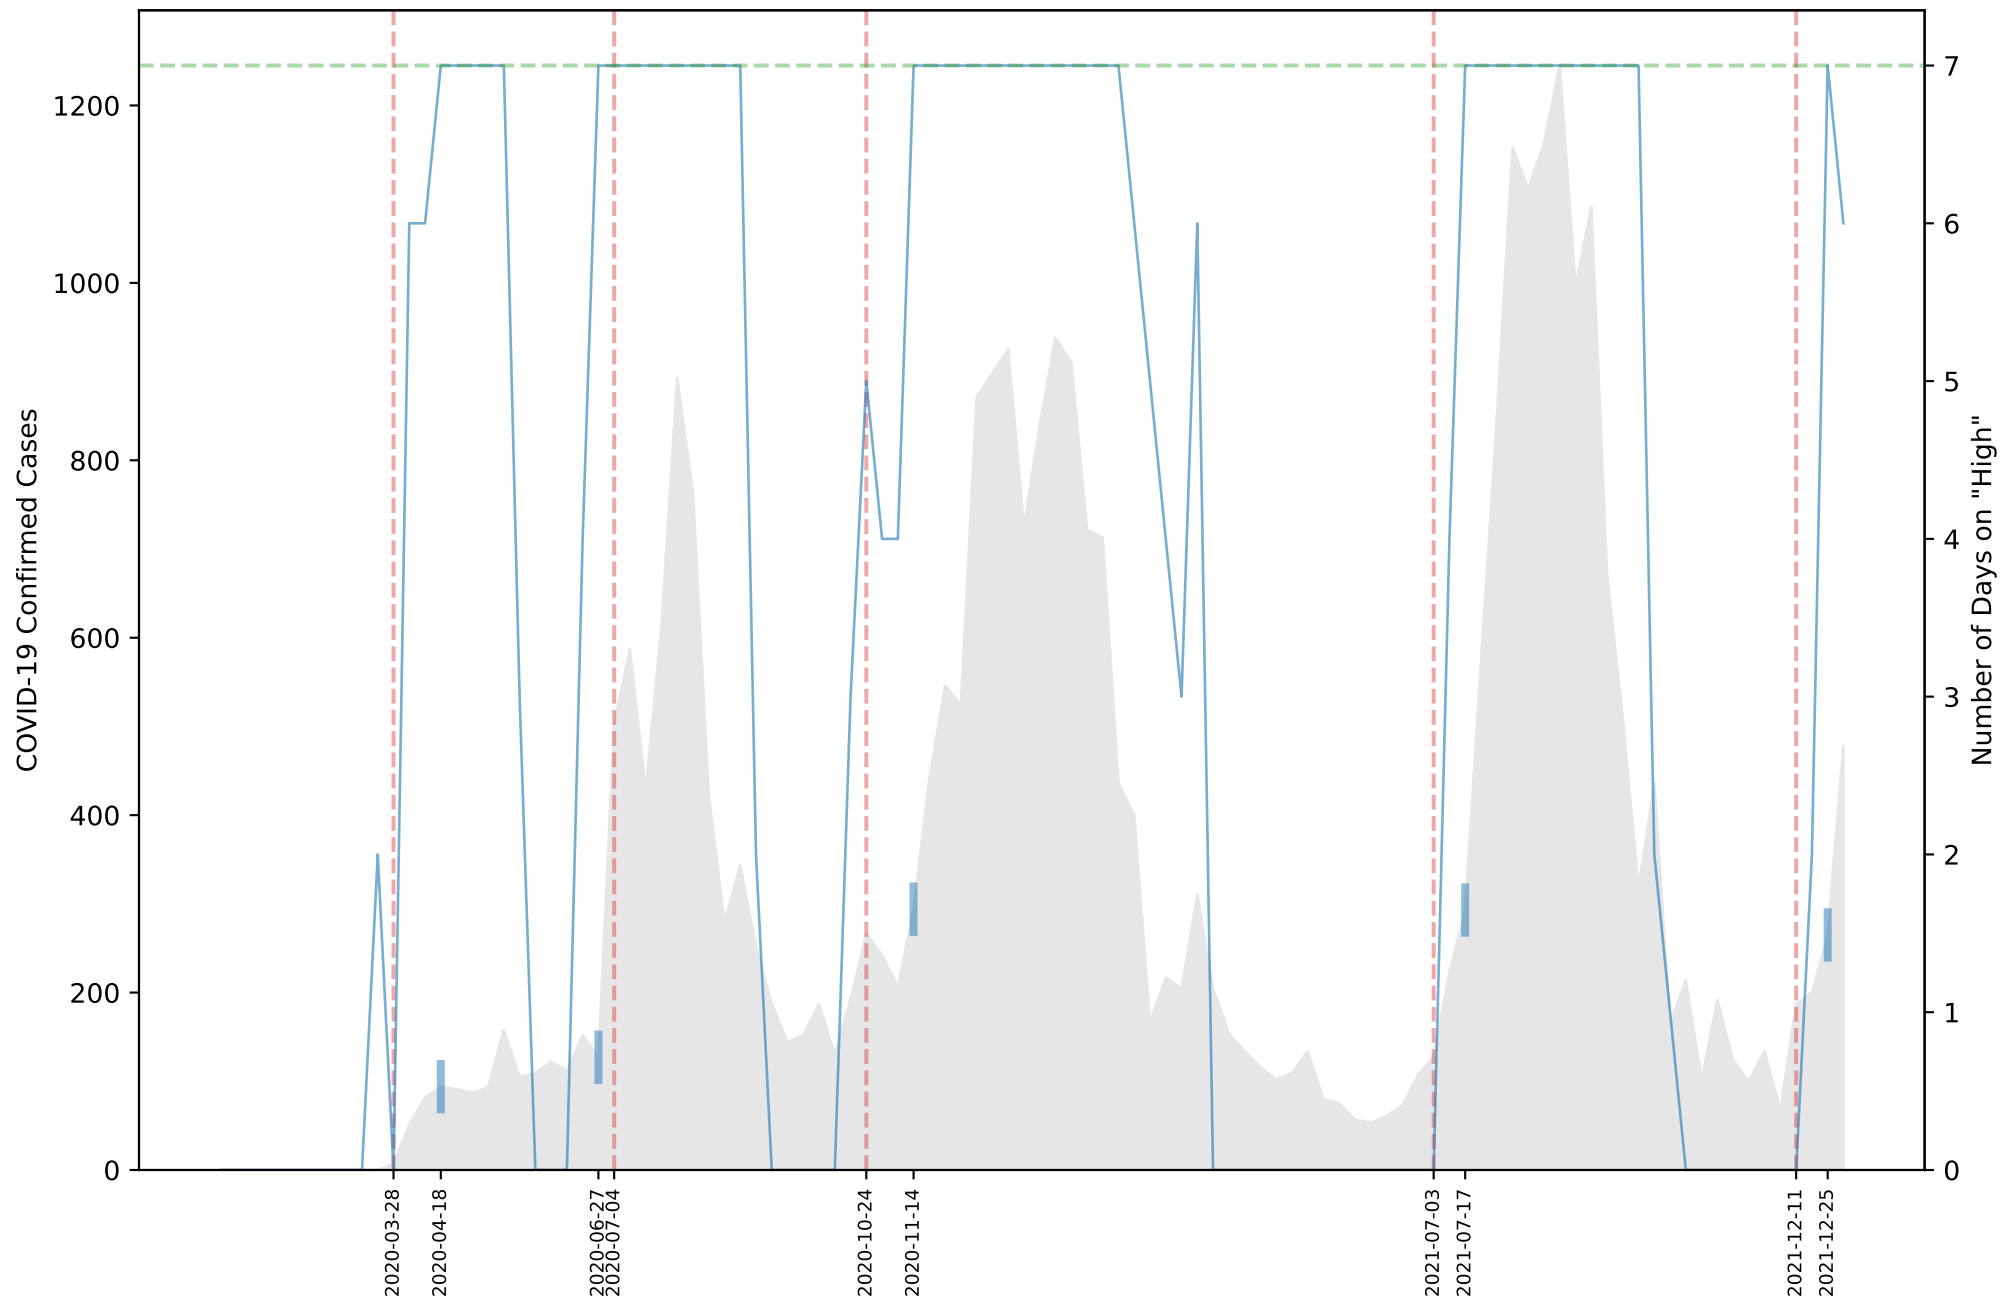

# NC, Cumberland

S242

- Number of days on 'High' transmission per week
- - - Threshold to mark the beginning of epidemic event for CDC signal
- █ CDC beginning of events
- - -  $r_o$  (Parag's method)

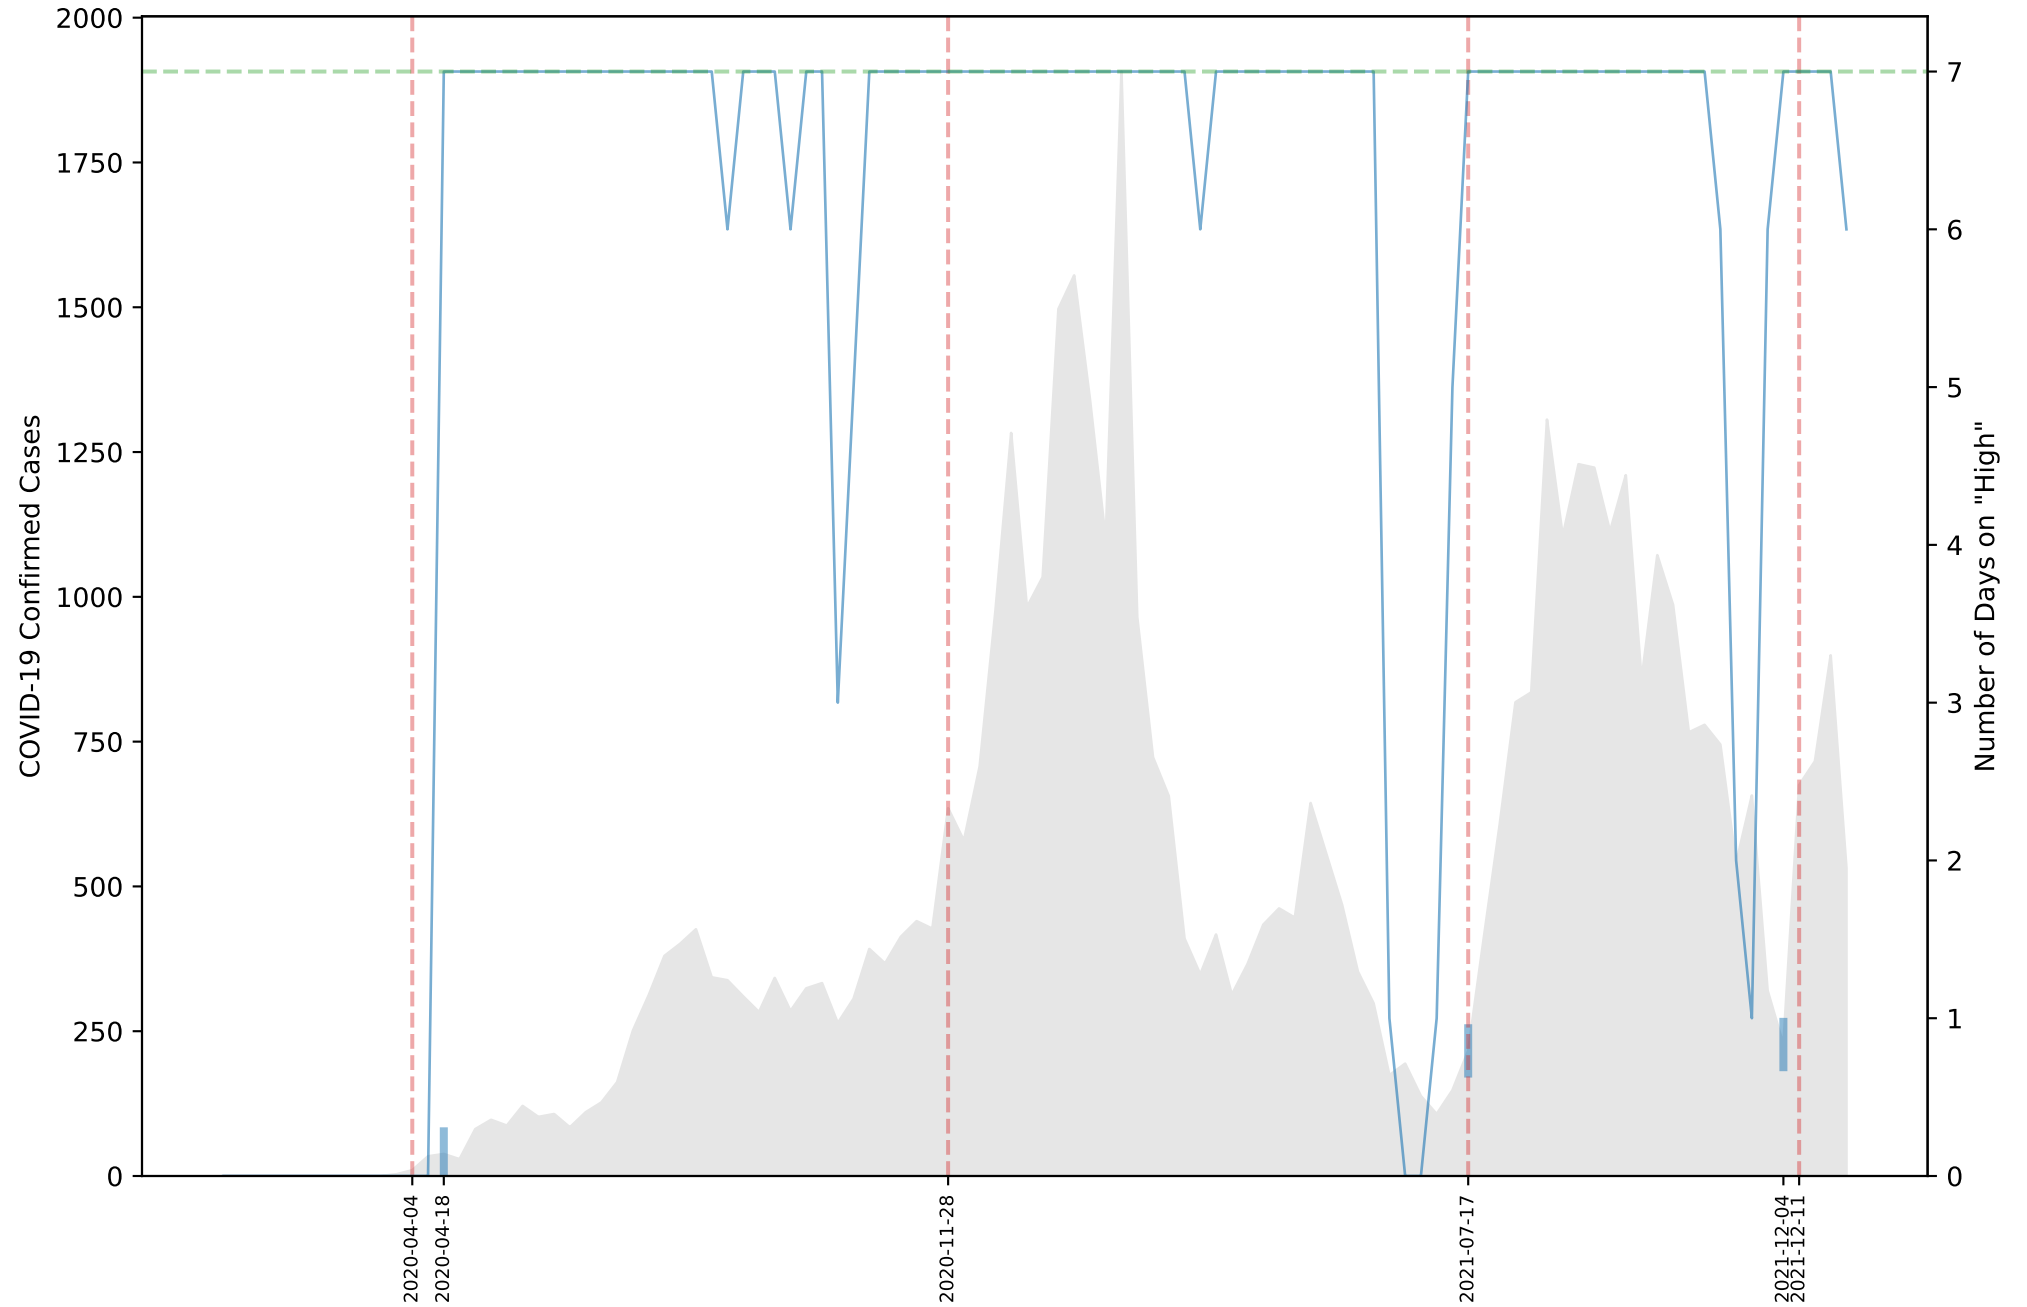

- Number of days on 'High' transmission per week
- - - Threshold to mark the beginning of epidemic event for CDC signal
- ▮ CDC beginning of events
- - -  $r_o$  (Parag's method)

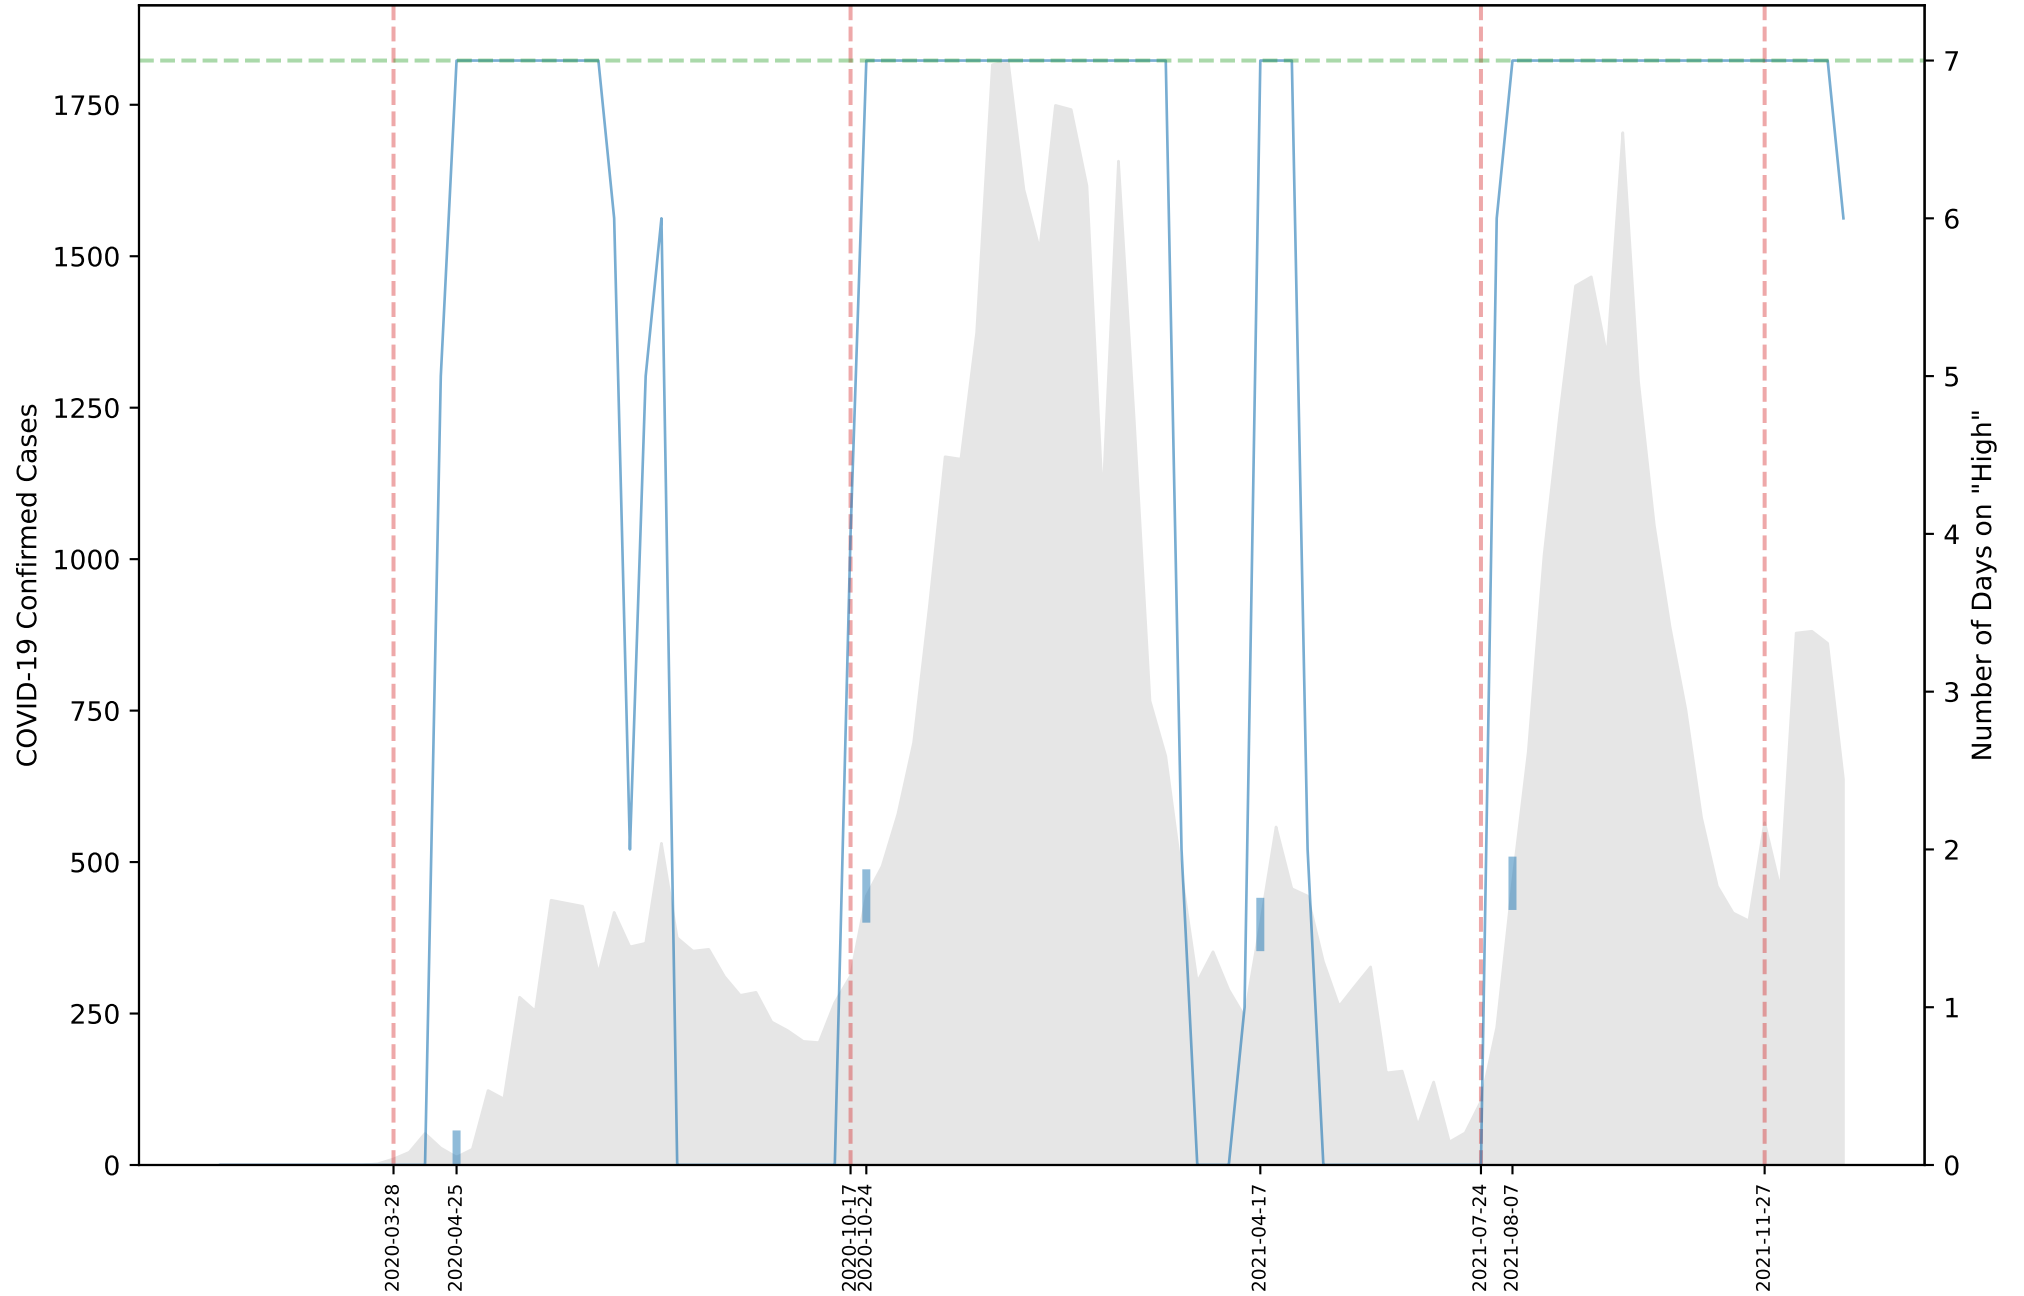

- Number of days on 'High' transmission per week
- - - Threshold to mark the beginning of epidemic event for CDC signal
- █ CDC beginning of events
- - -  $r_o$  (Parag's method)

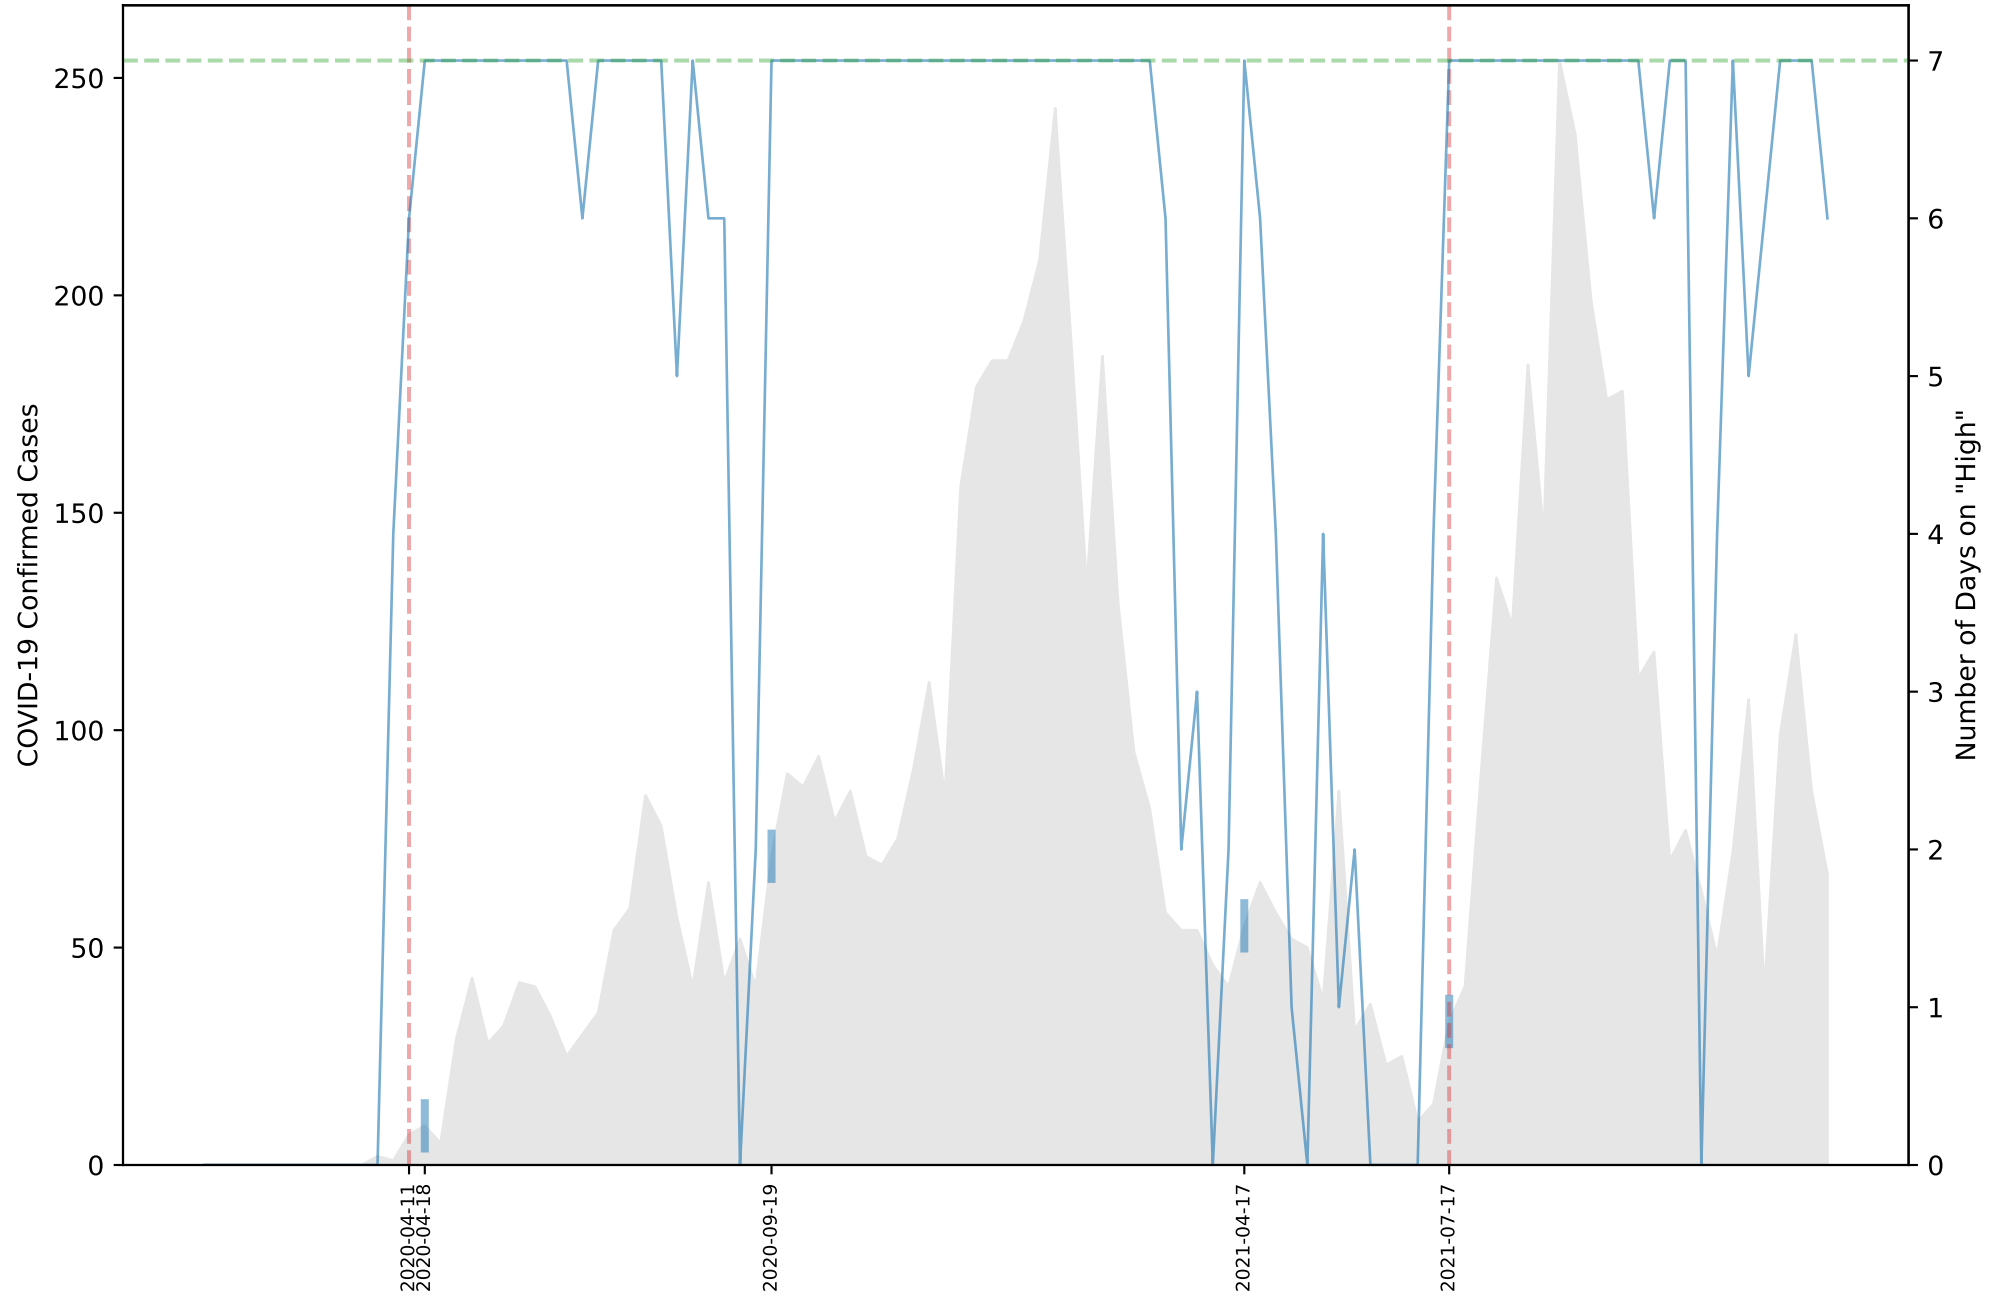

- Number of days on 'High' transmission per week
- - - Threshold to mark the beginning of epidemic event for CDC signal
- █ CDC beginning of events
- - -  $r_o$  (Parag's method)

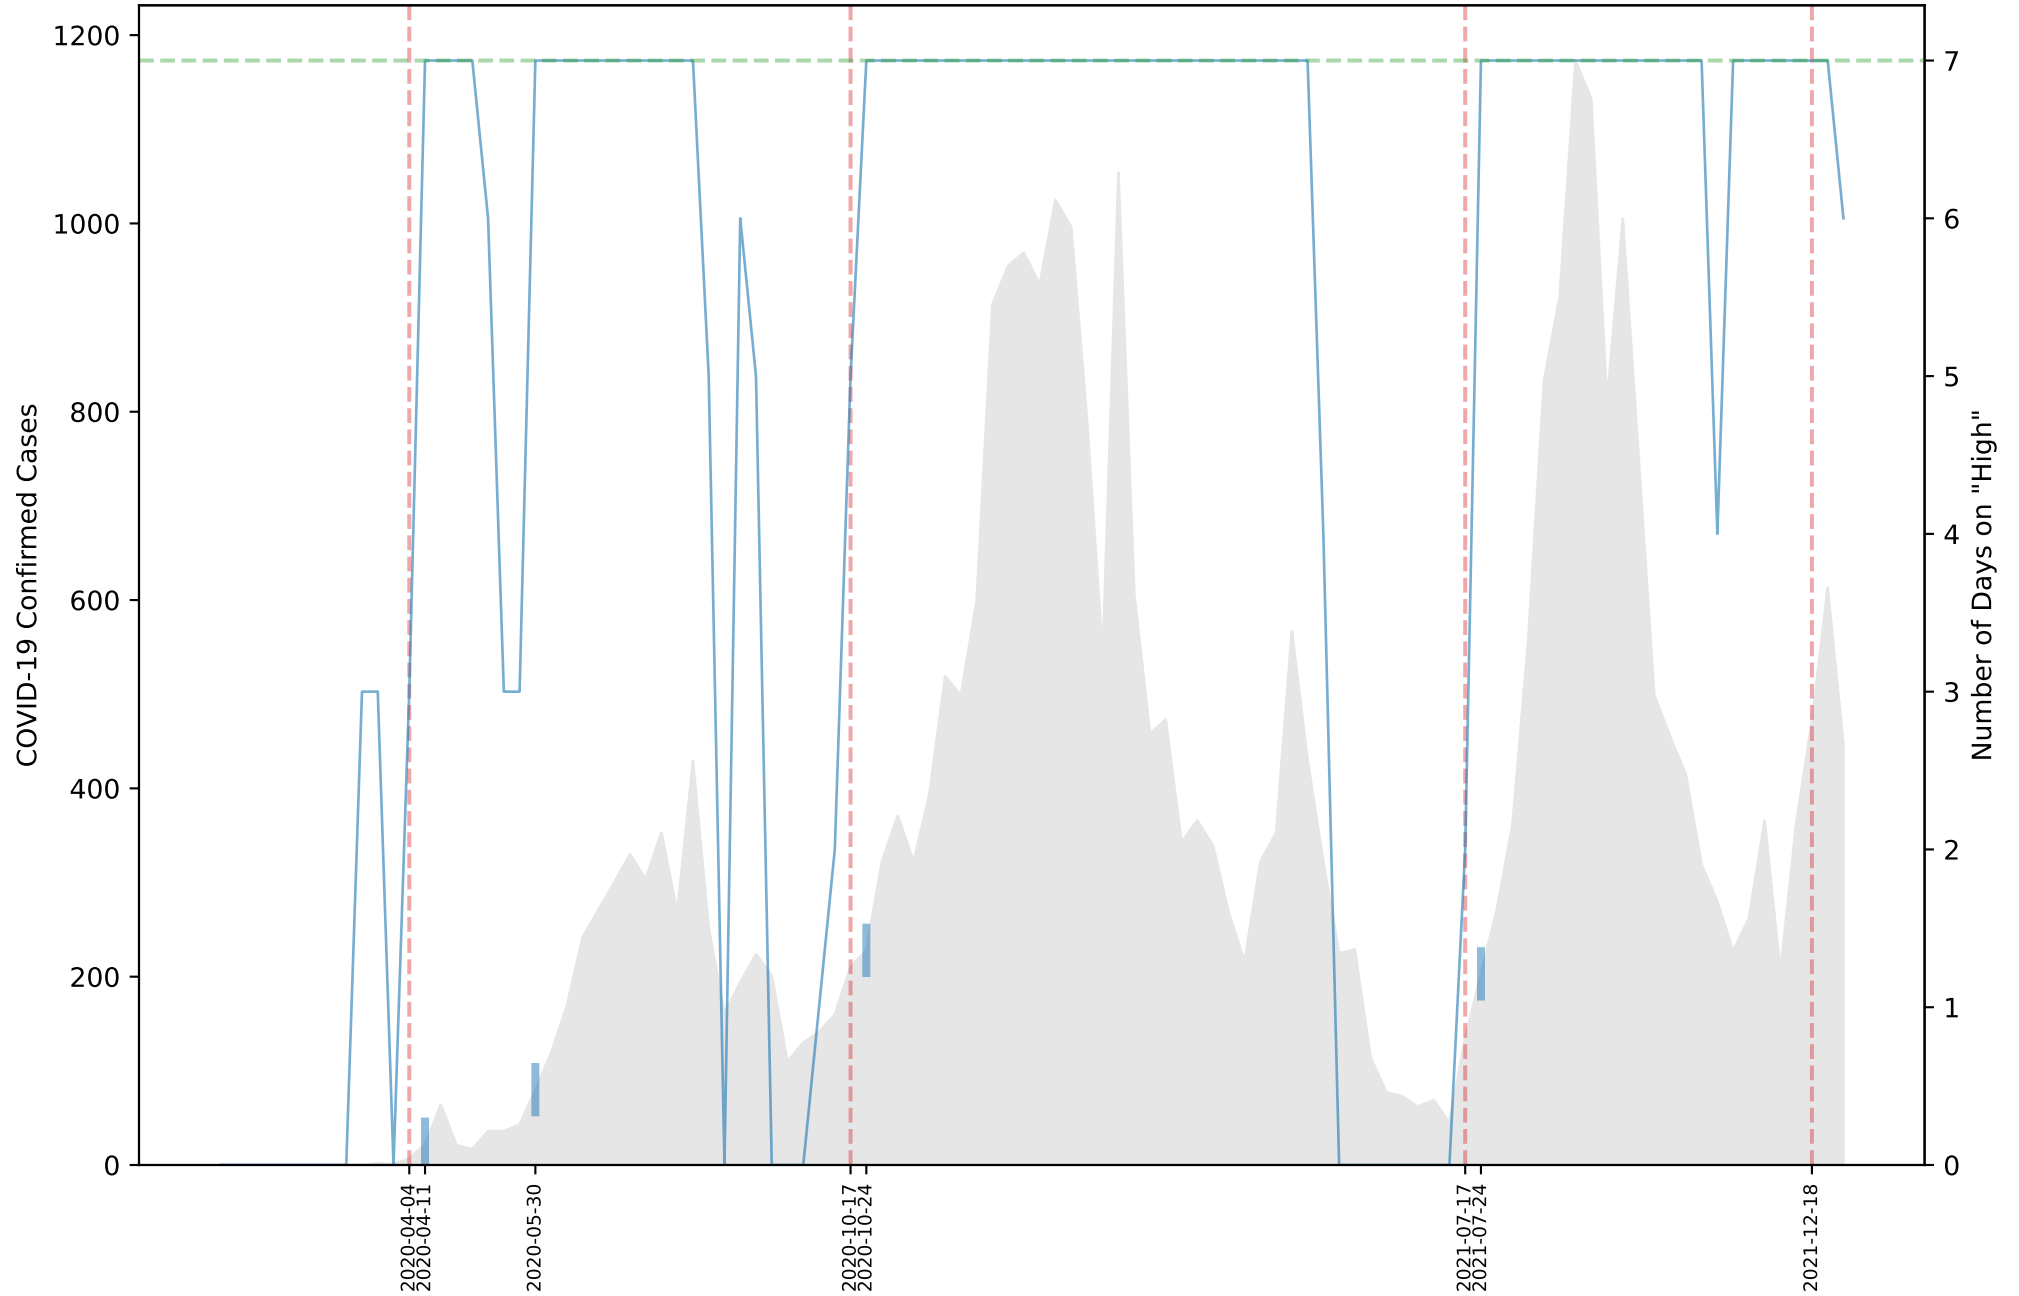

- Number of days on 'High' transmission per week
- - - Threshold to mark the beginning of epidemic event for CDC signal
- █ CDC beginning of events
- - -  $r_o$  (Parag's method)

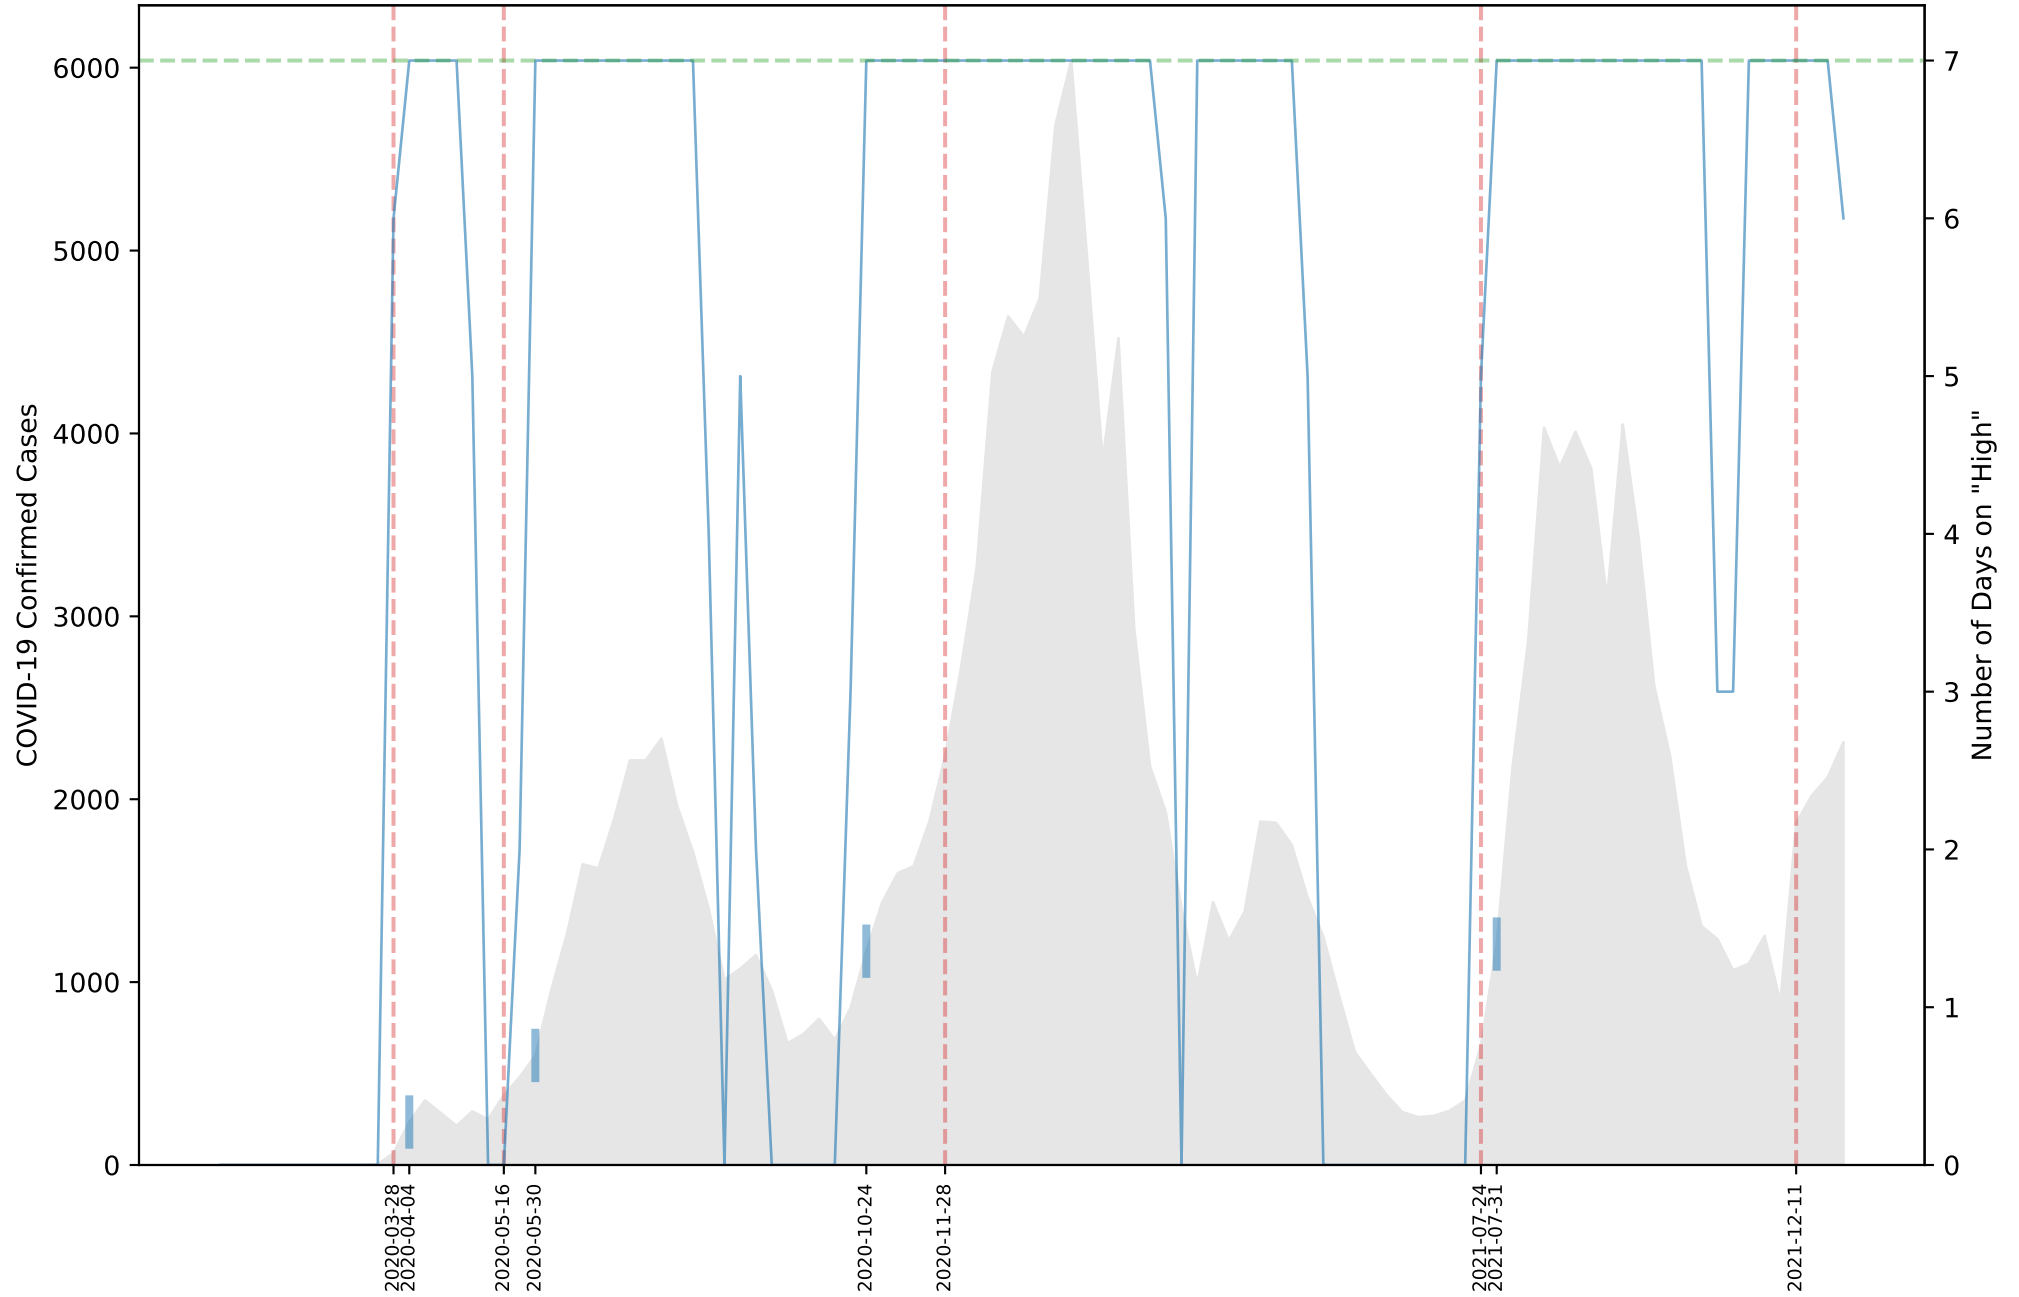



- Number of days on 'High' transmission per week
- - - Threshold to mark the beginning of epidemic event for CDC signal
- █ CDC beginning of events
- - -  $r_o$  (Parag's method)

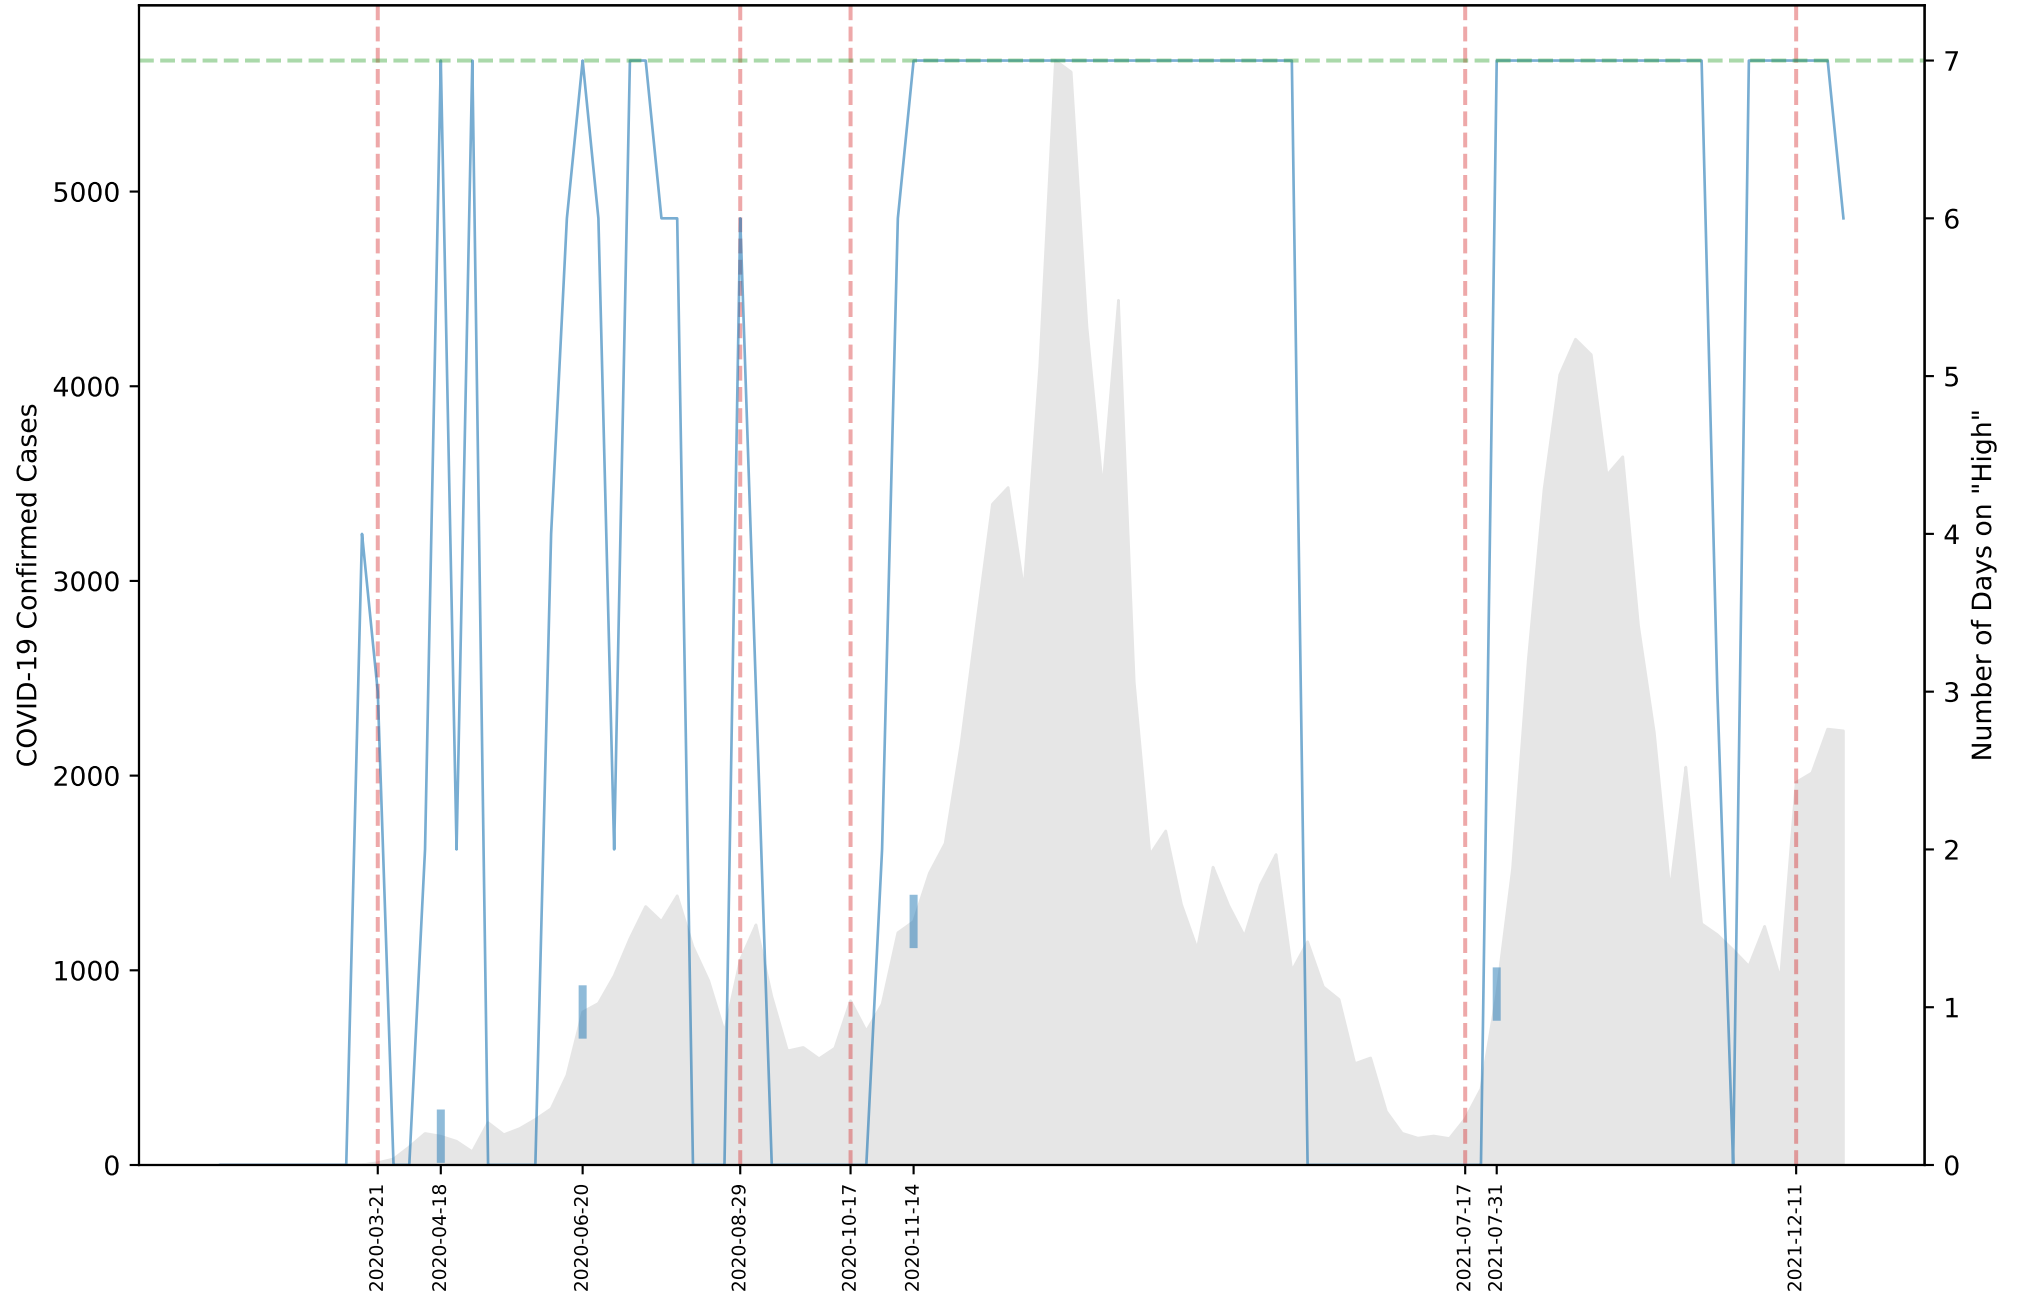

- Number of days on 'High' transmission per week
- Threshold to mark the beginning of epidemic event for CDC signal
- CDC beginning of events
- $r_o$  (Parag's method)

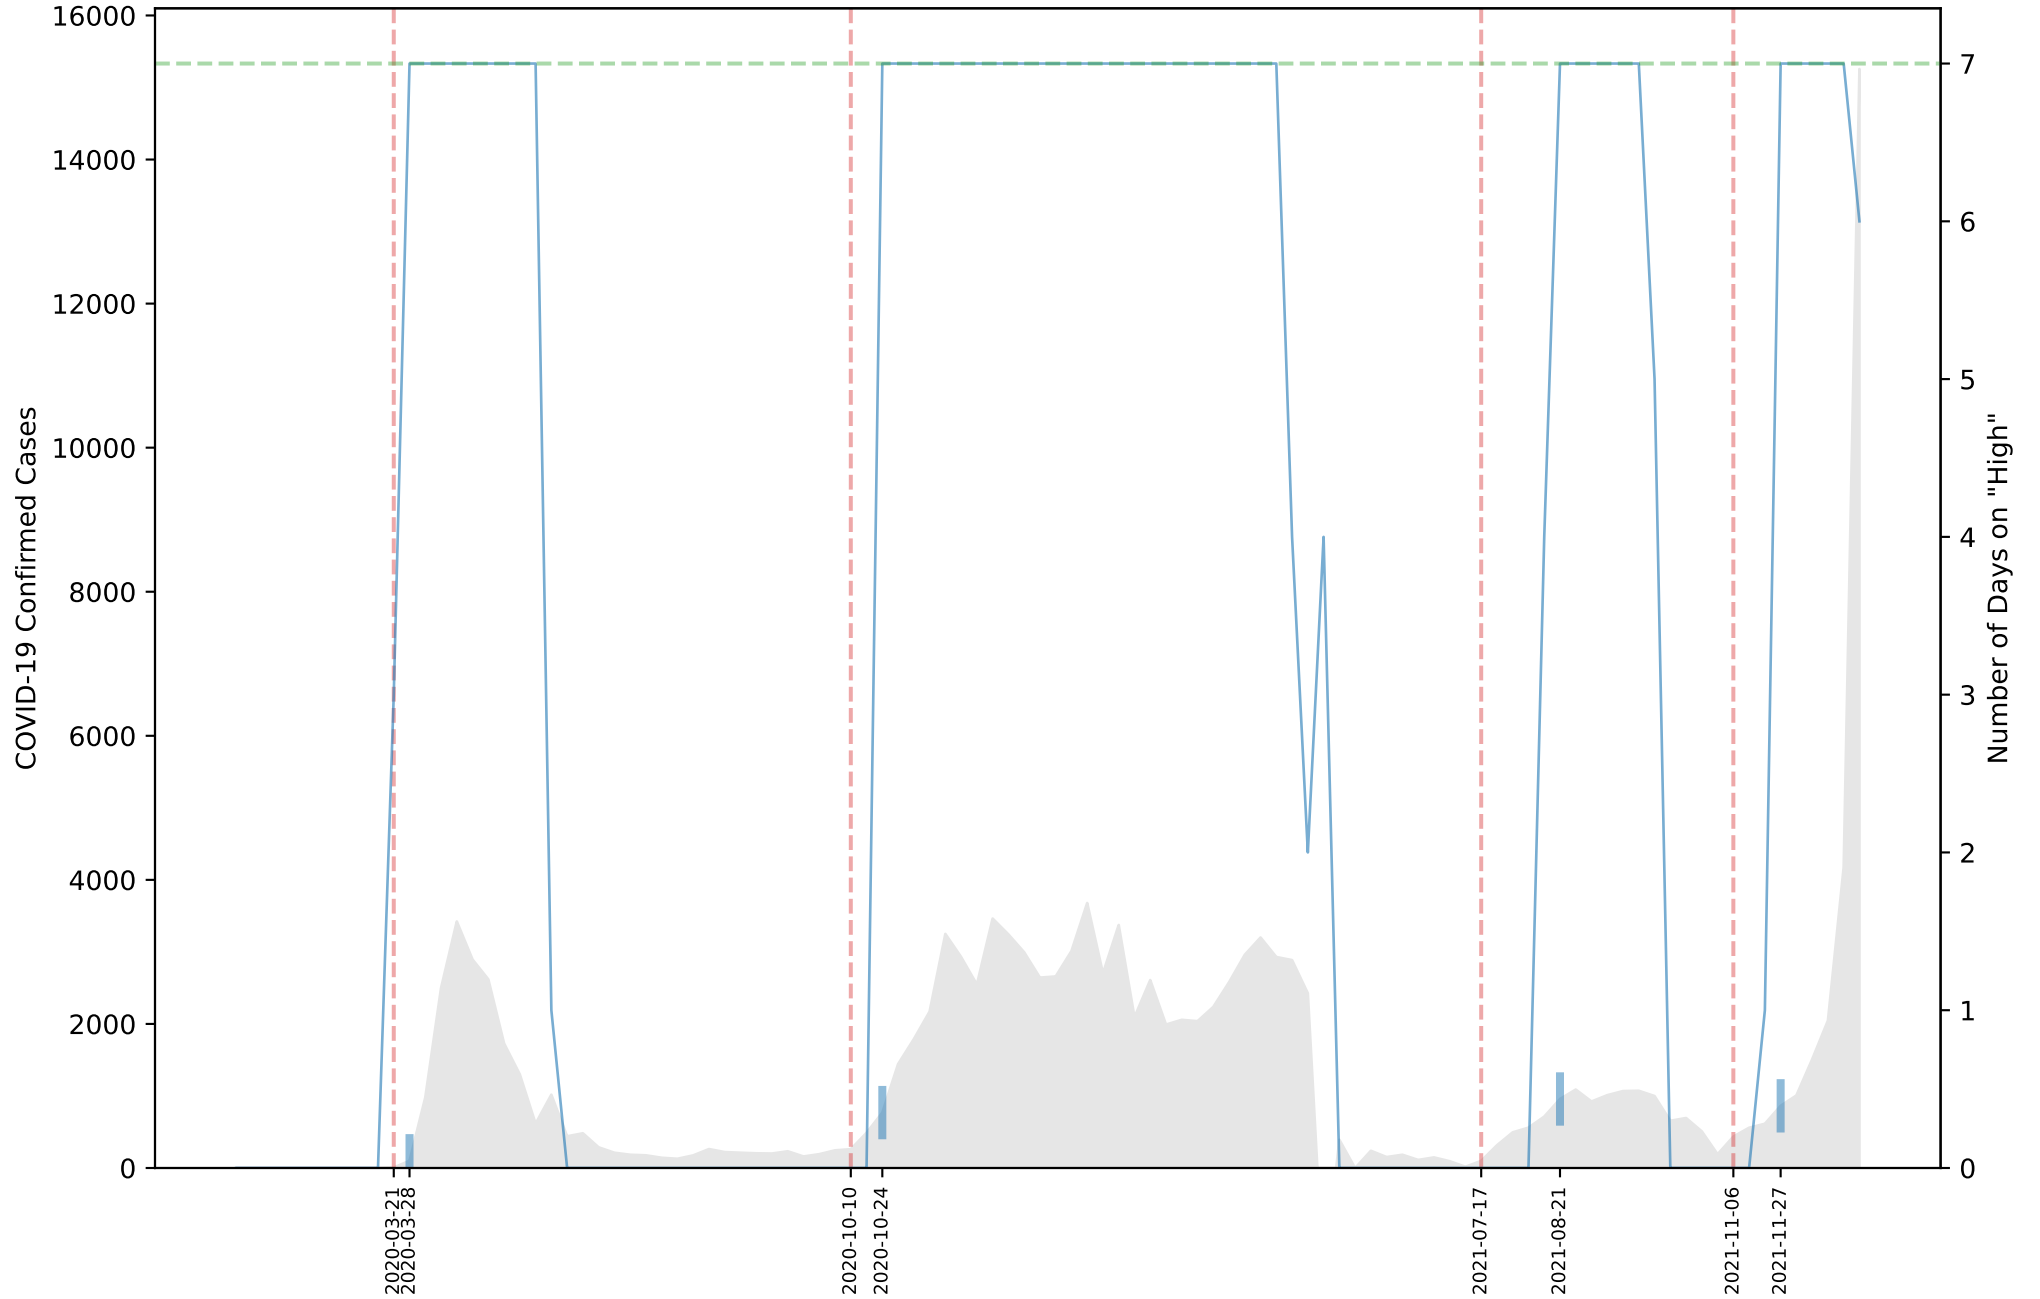

- Number of days on 'High' transmission per week
- - - Threshold to mark the beginning of epidemic event for CDC signal
- █ CDC beginning of events
- - -  $r_o$  (Parag's method)

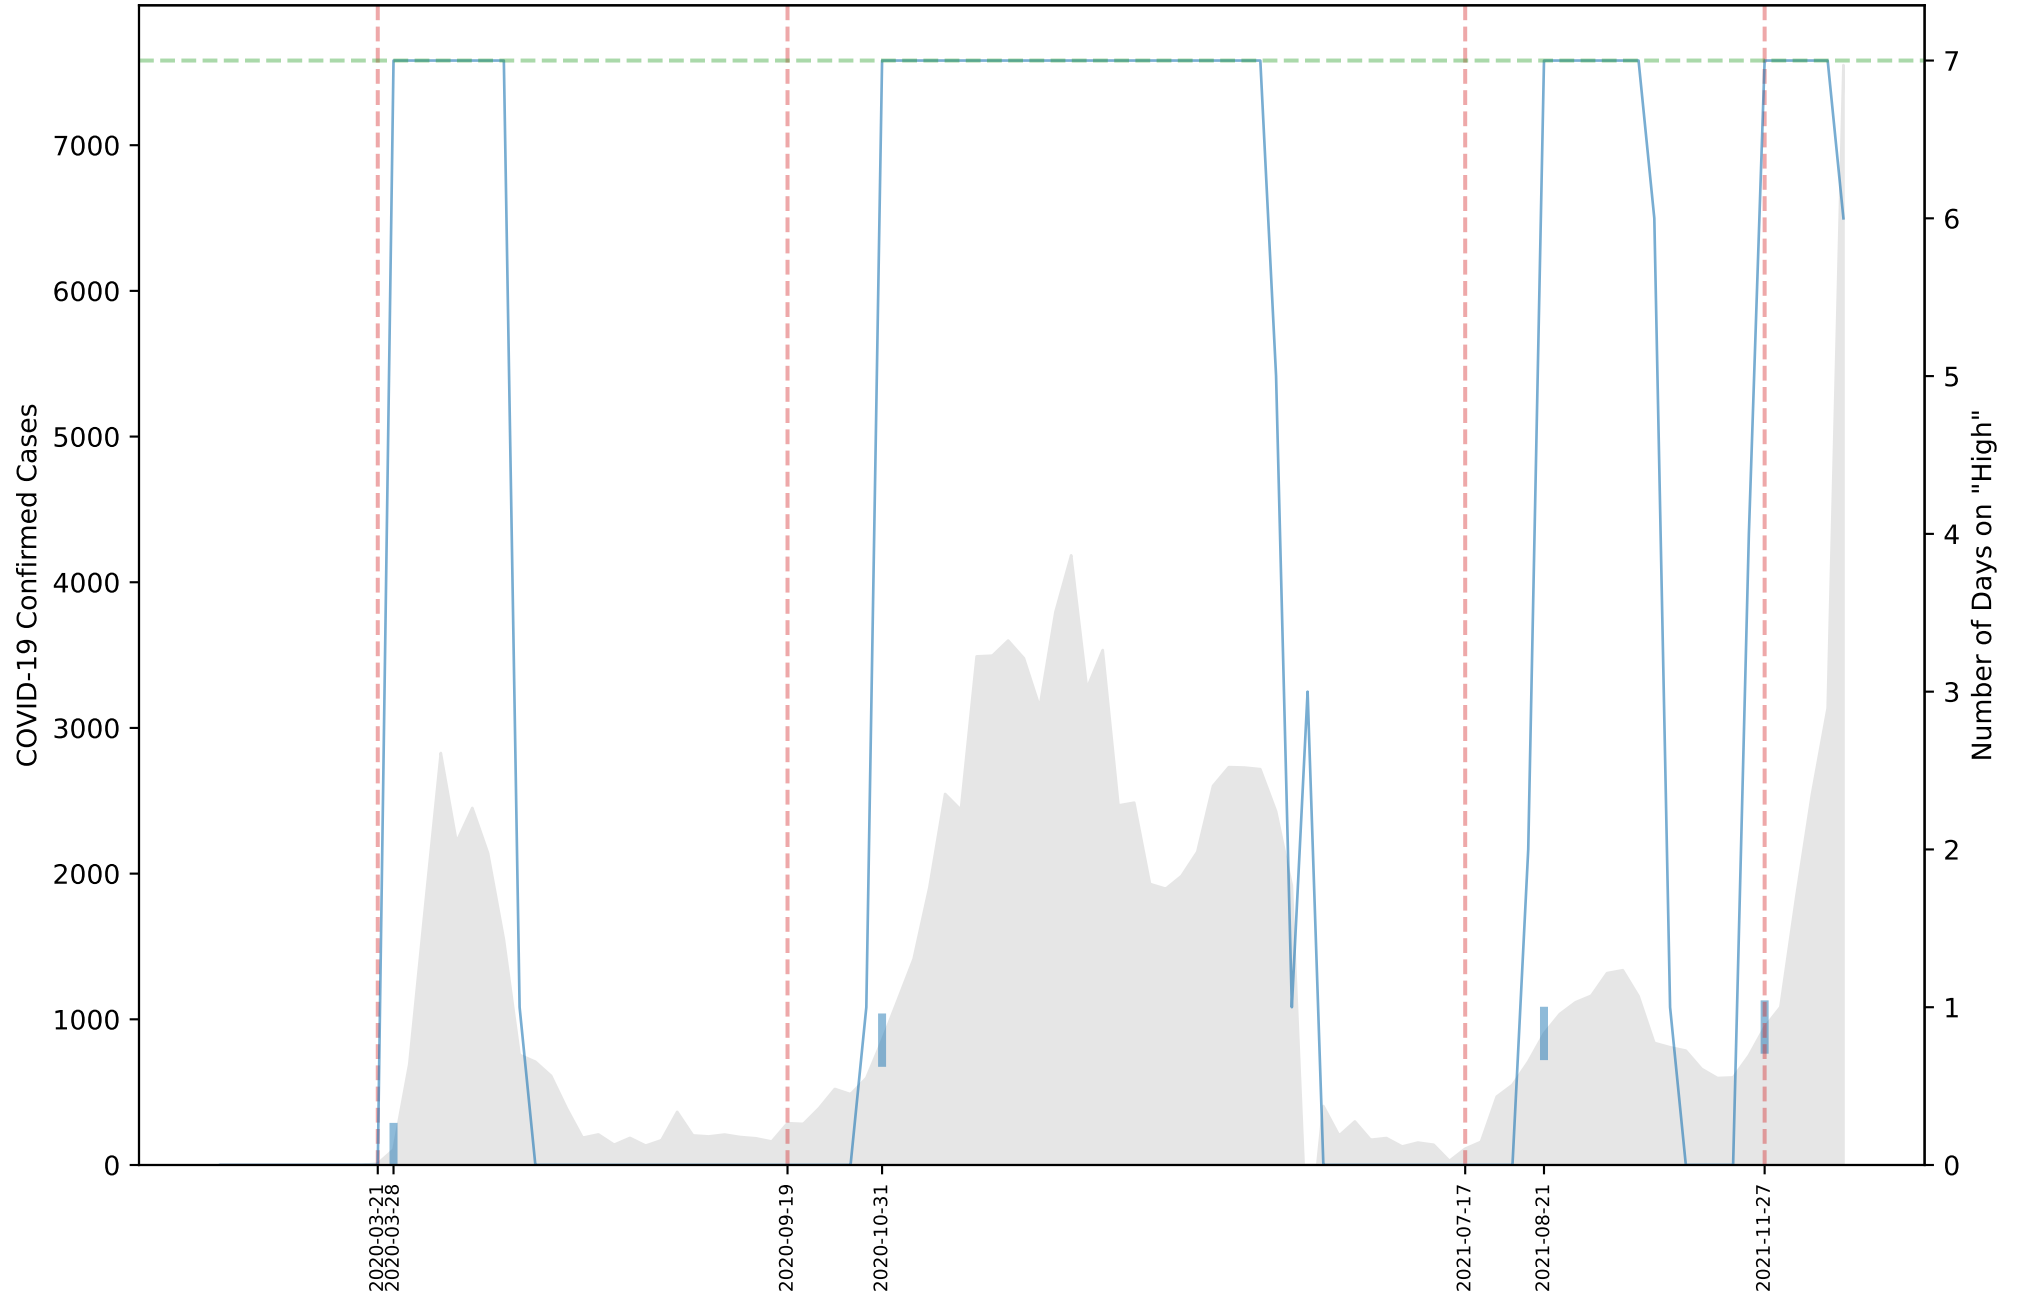

# NM, Bernalillo

S250

- Number of days on 'High' transmission per week
- - - Threshold to mark the beginning of epidemic event for CDC signal
- █ CDC beginning of events
- - -  $r_o$  (Parag's method)

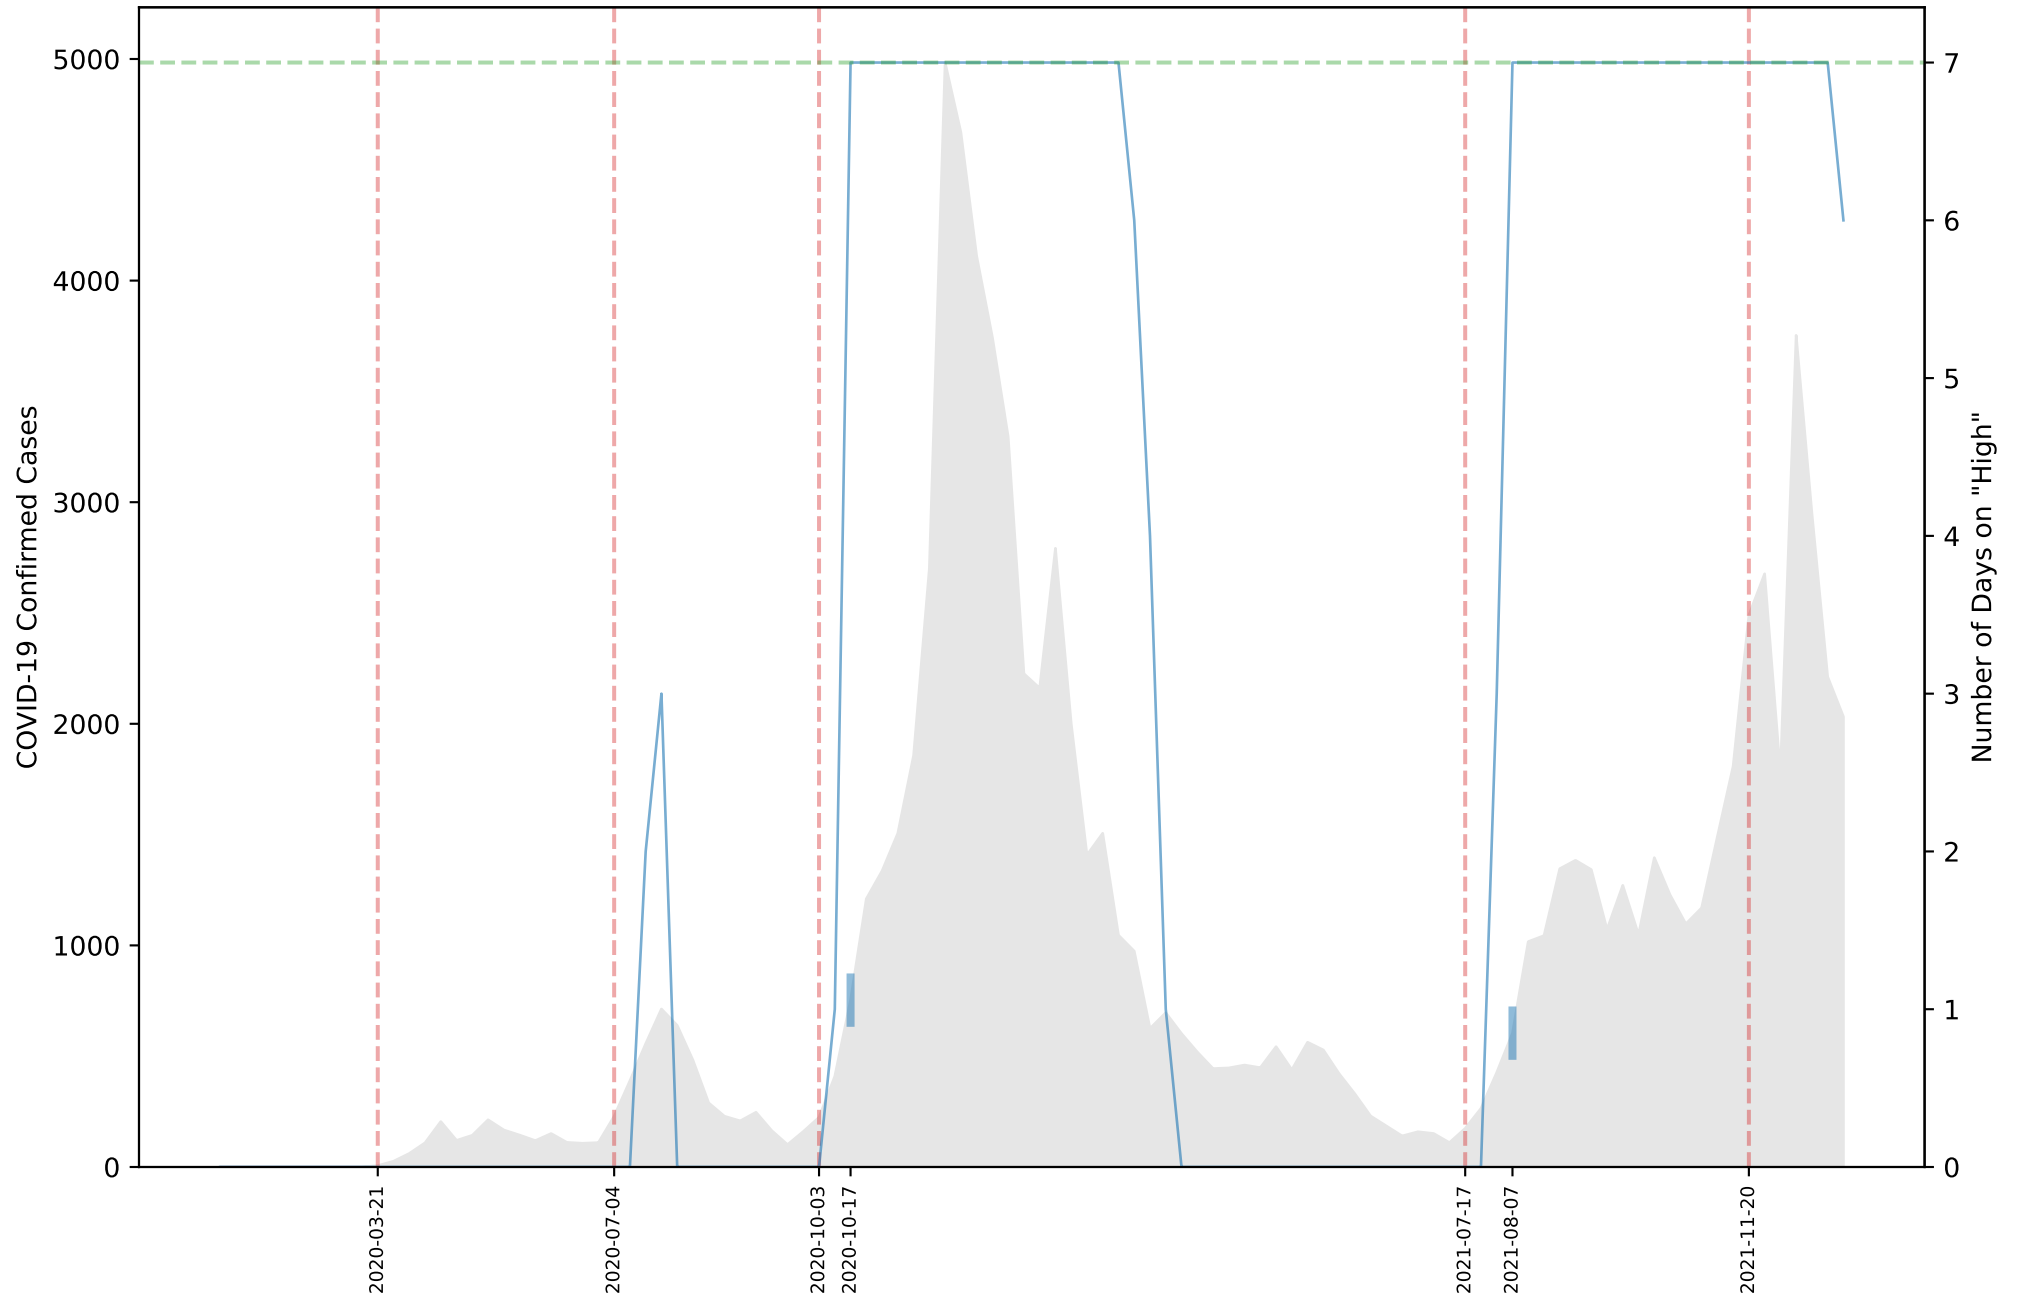

- Number of days on 'High' transmission per week
- - - Threshold to mark the beginning of epidemic event for CDC signal
- █ CDC beginning of events
- - -  $r_o$  (Parag's method)

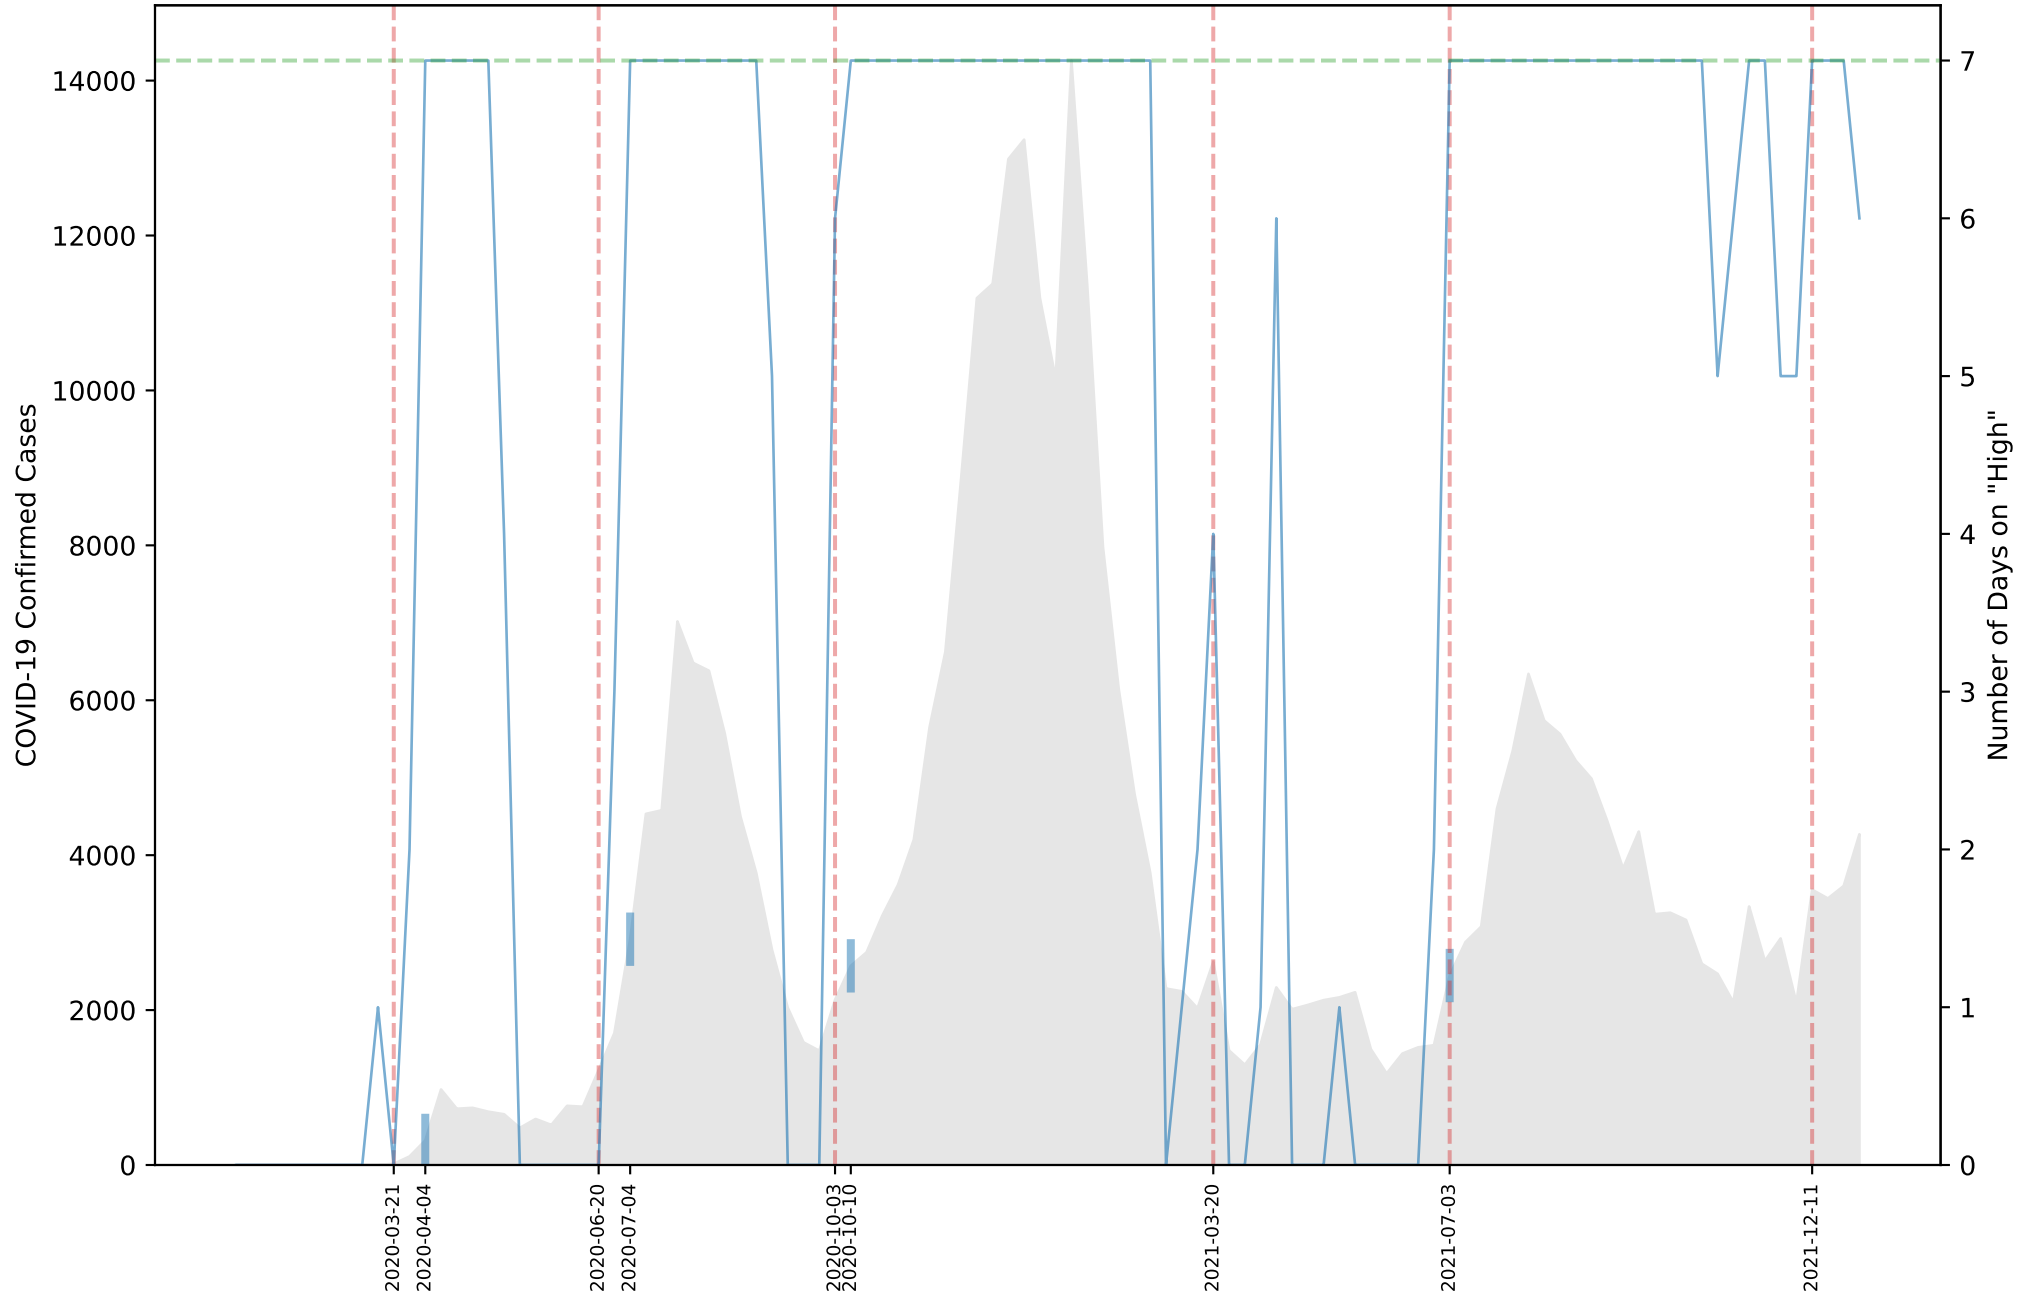

- Number of days on 'High' transmission per week
- - - Threshold to mark the beginning of epidemic event for CDC signal
- █ CDC beginning of events
- - -  $r_o$  (Parag's method)

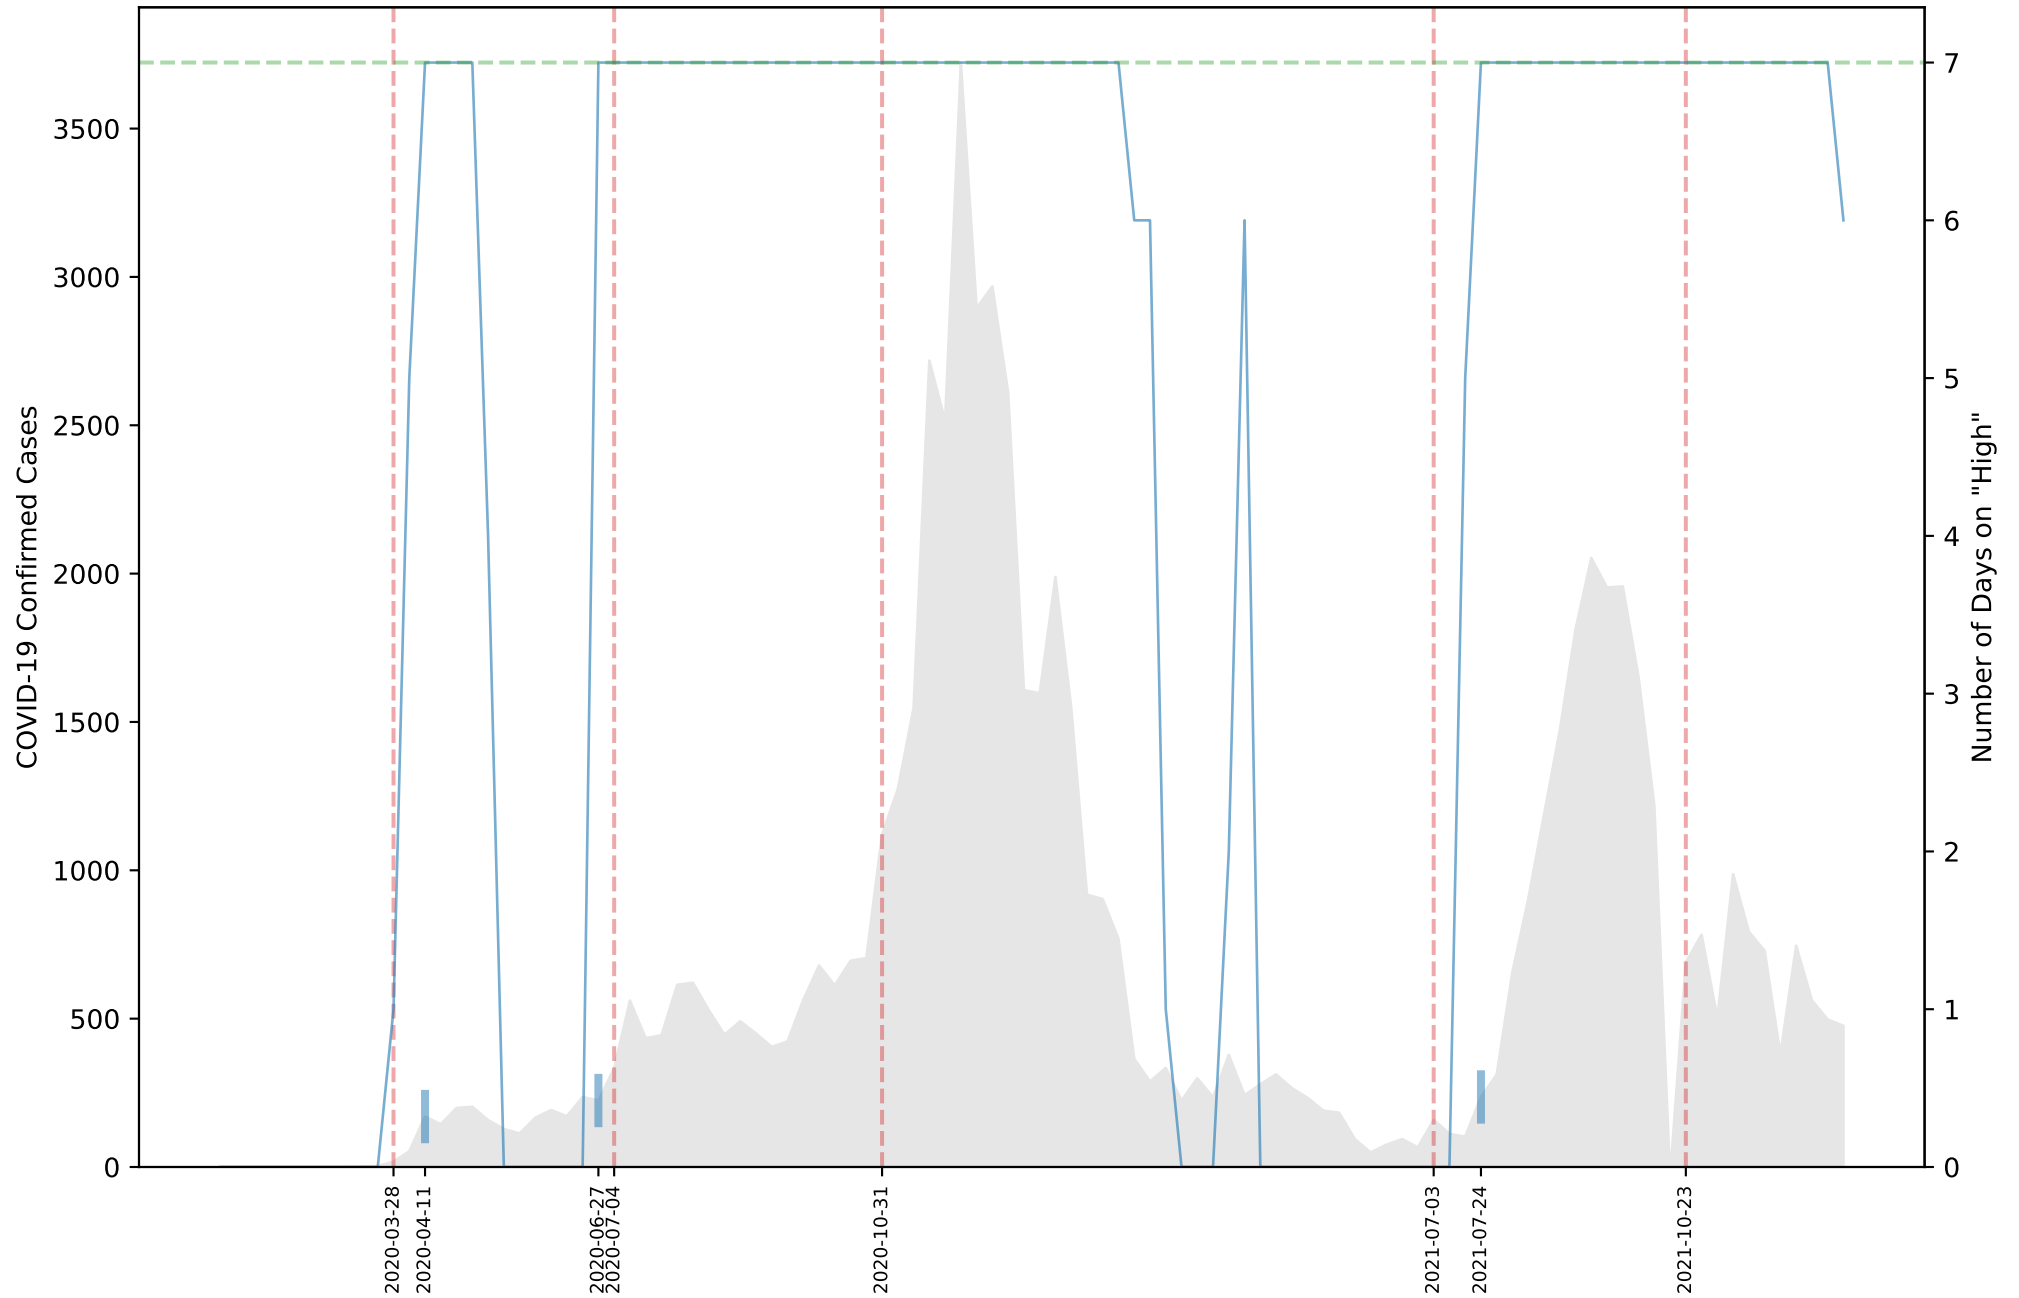

- Number of days on 'High' transmission per week
- - - Threshold to mark the beginning of epidemic event for CDC signal
- █ CDC beginning of events
- - -  $r_o$  (Parag's method)

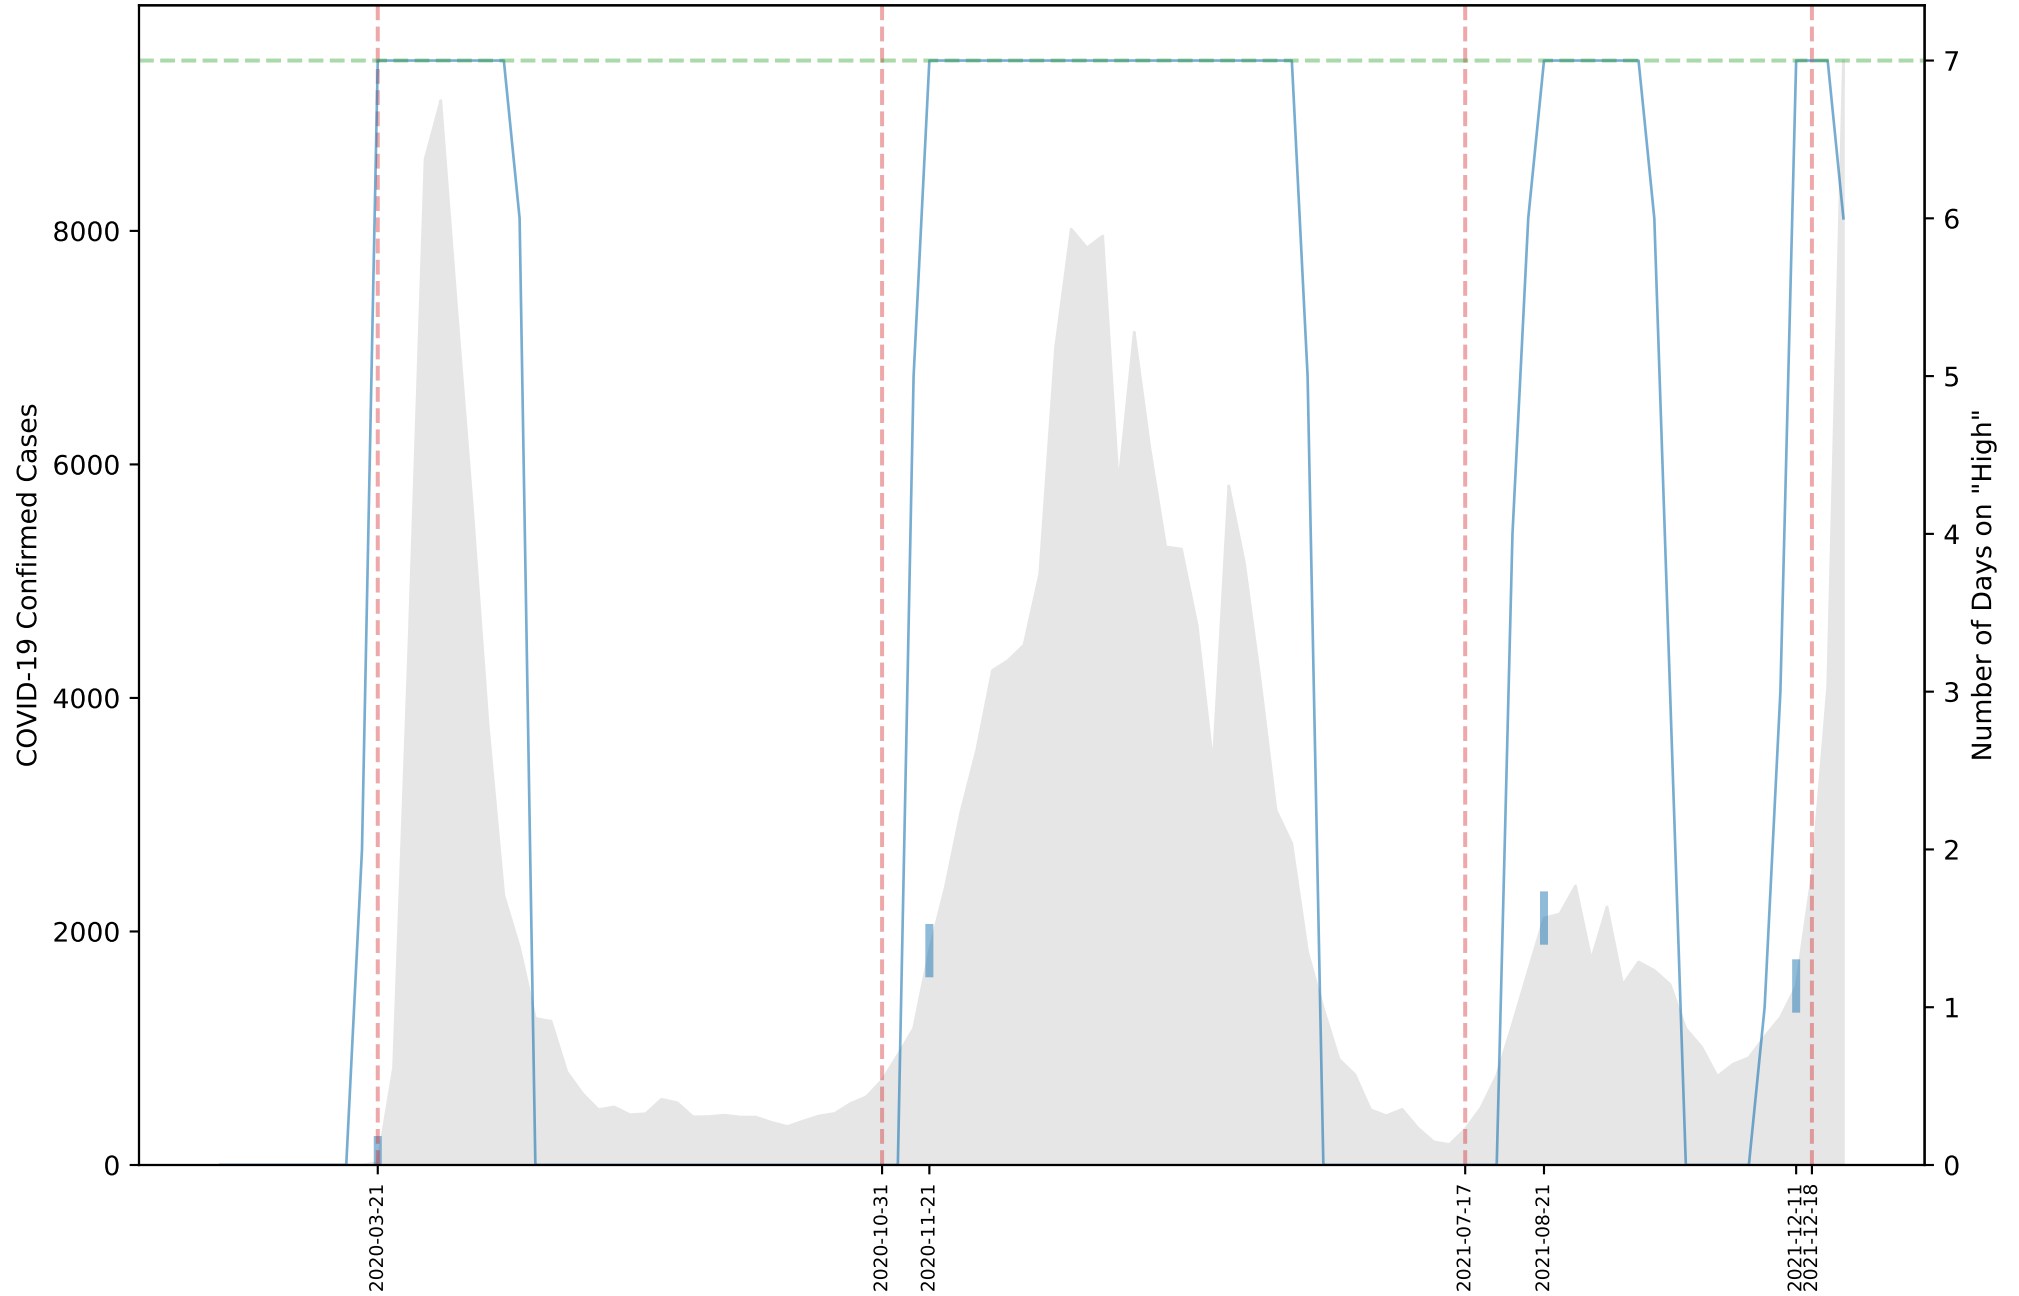

# NY, Kings

S254

- Number of days on 'High' transmission per week
- Threshold to mark the beginning of epidemic event for CDC signal
- CDC beginning of events
- $r_o$  (Parag's method)

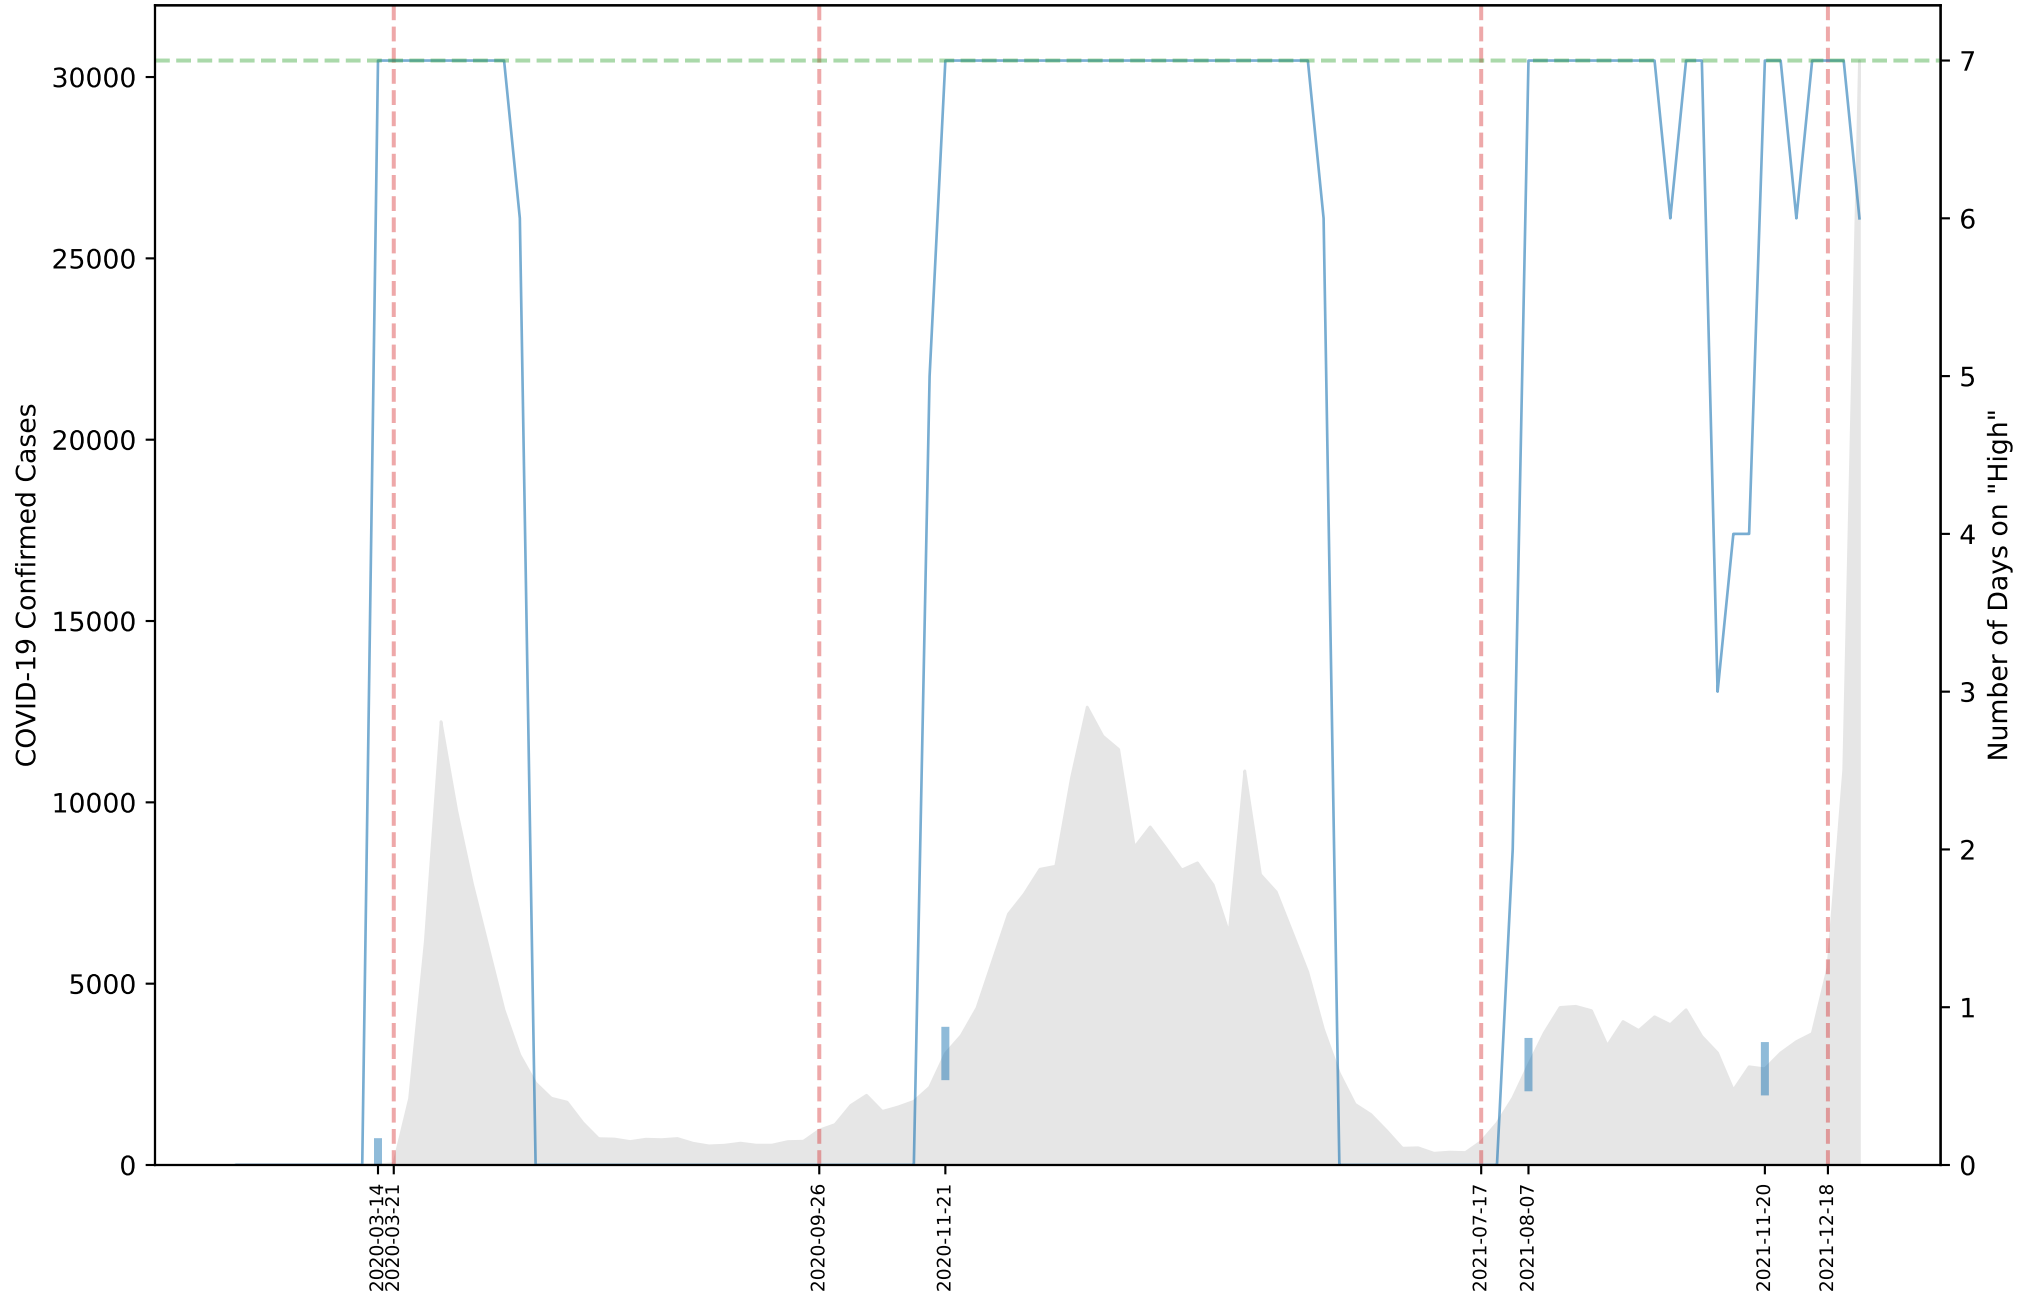



- Number of days on 'High' transmission per week
- - - Threshold to mark the beginning of epidemic event for CDC signal
- █ CDC beginning of events
- - -  $r_o$  (Parag's method)

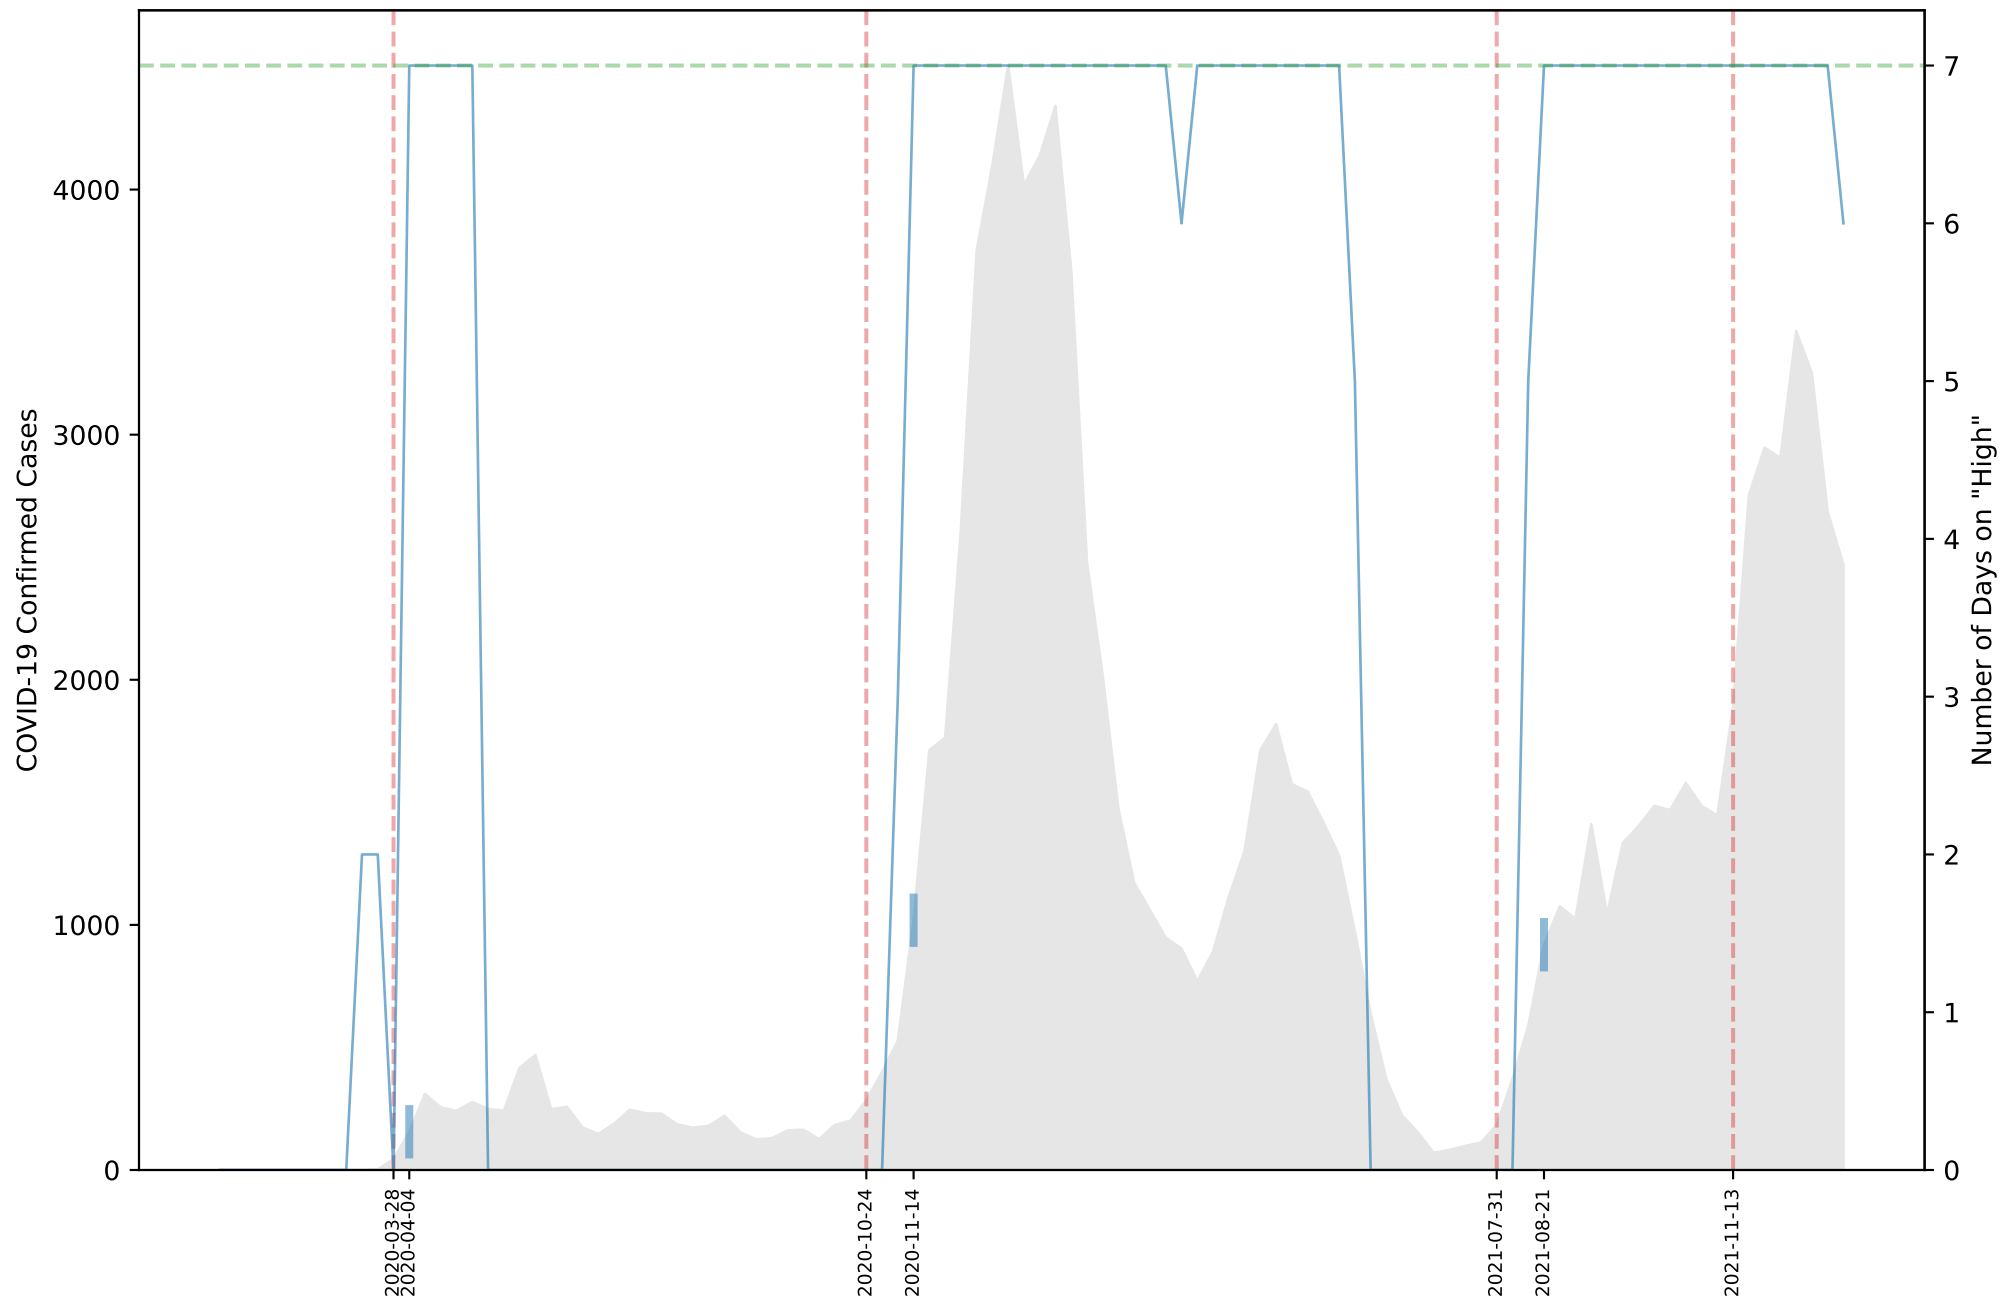

- Number of days on 'High' transmission per week
- Threshold to mark the beginning of epidemic event for CDC signal
- █ CDC beginning of events
- - -  $r_o$  (Parag's method)

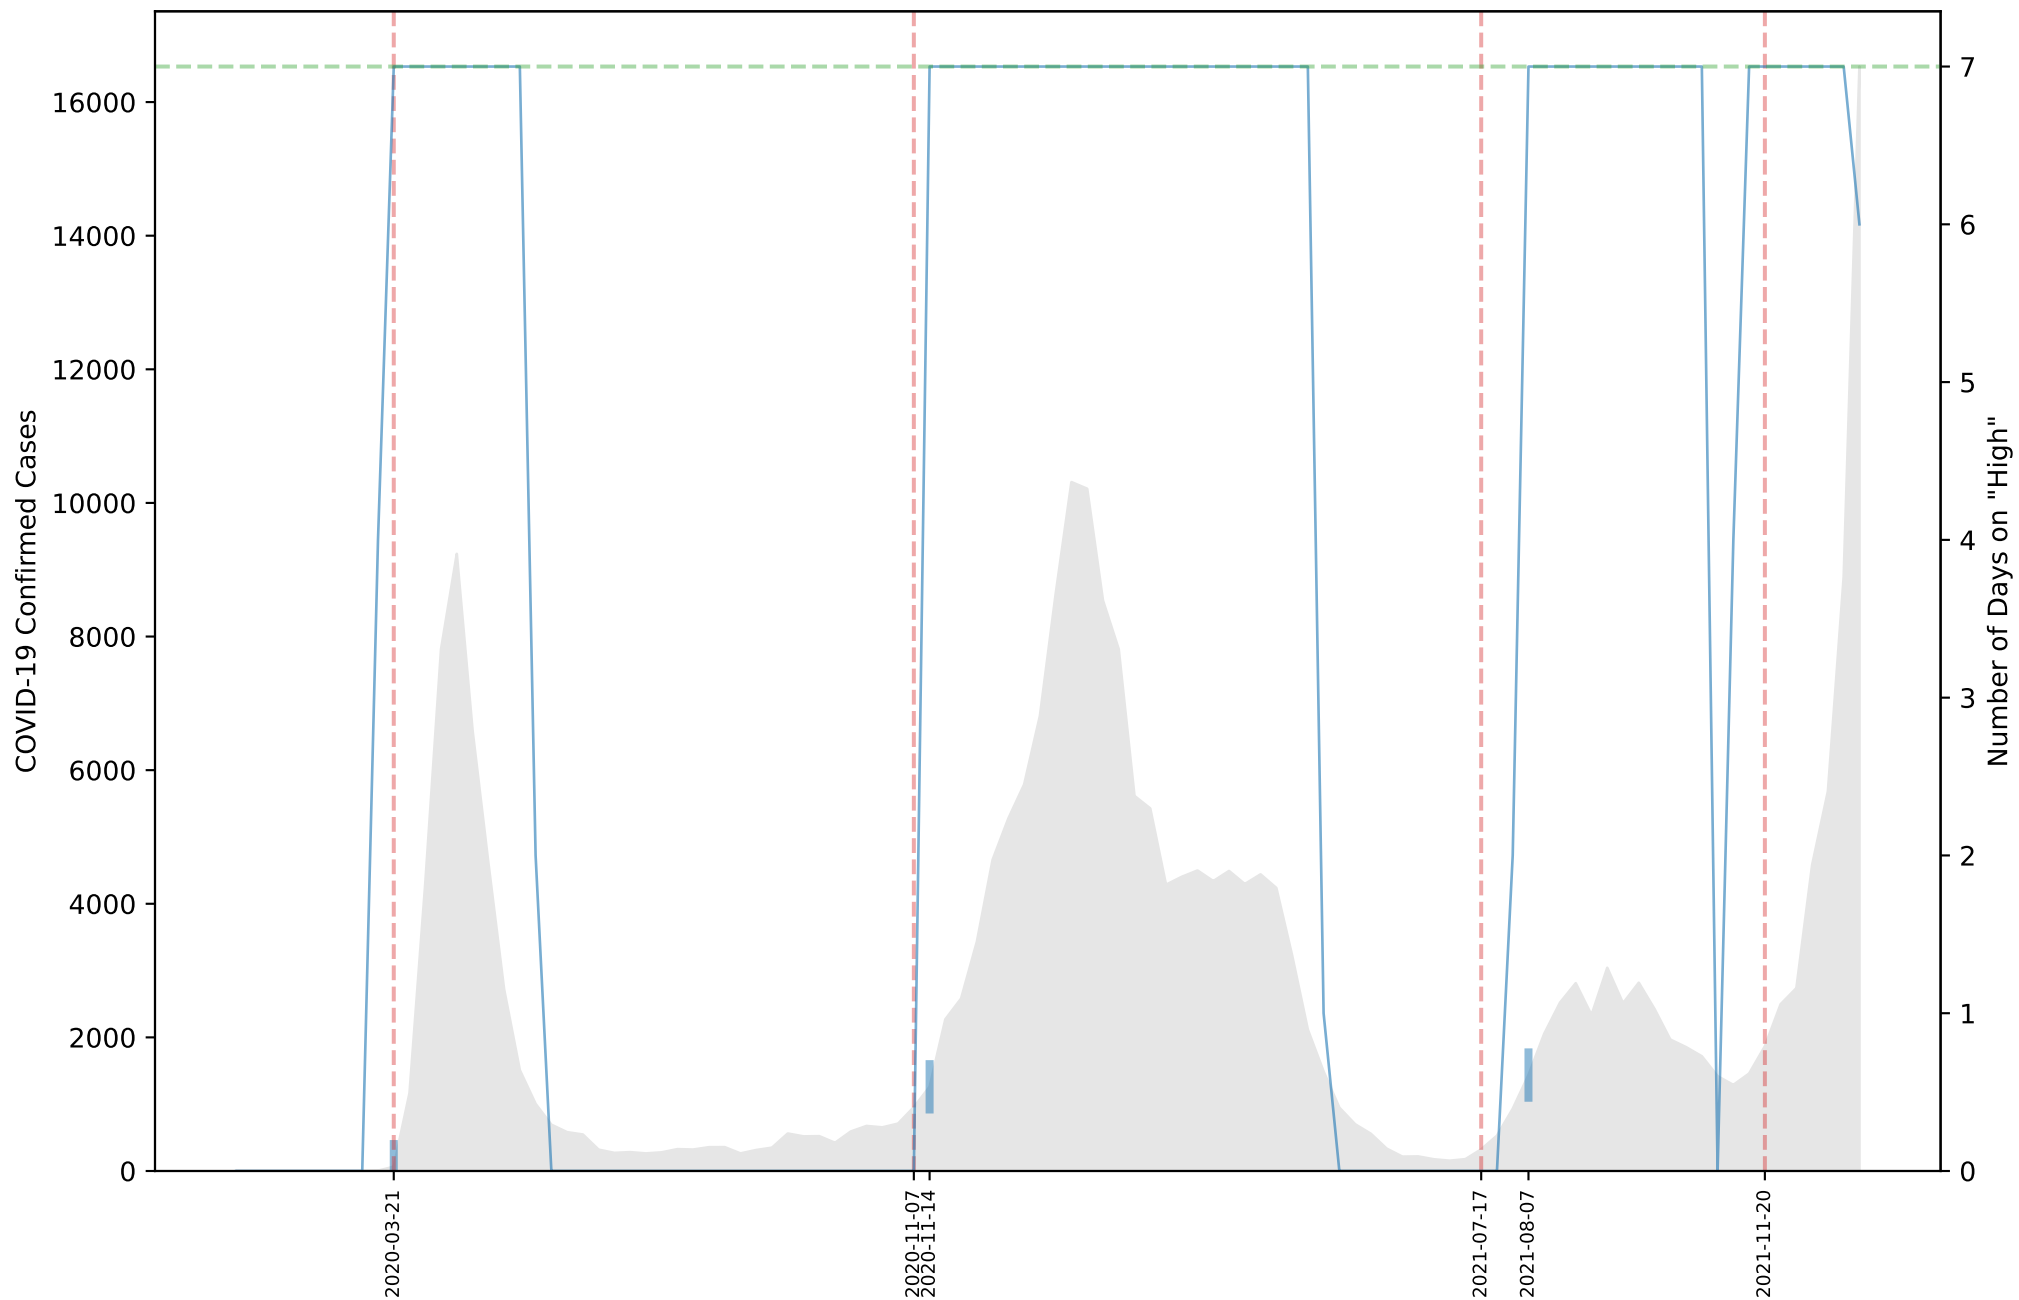

# NY, New York

S257

- Number of days on 'High' transmission per week
- - - Threshold to mark the beginning of epidemic event for CDC signal
- █ CDC beginning of events
- - -  $r_o$  (Parag's method)

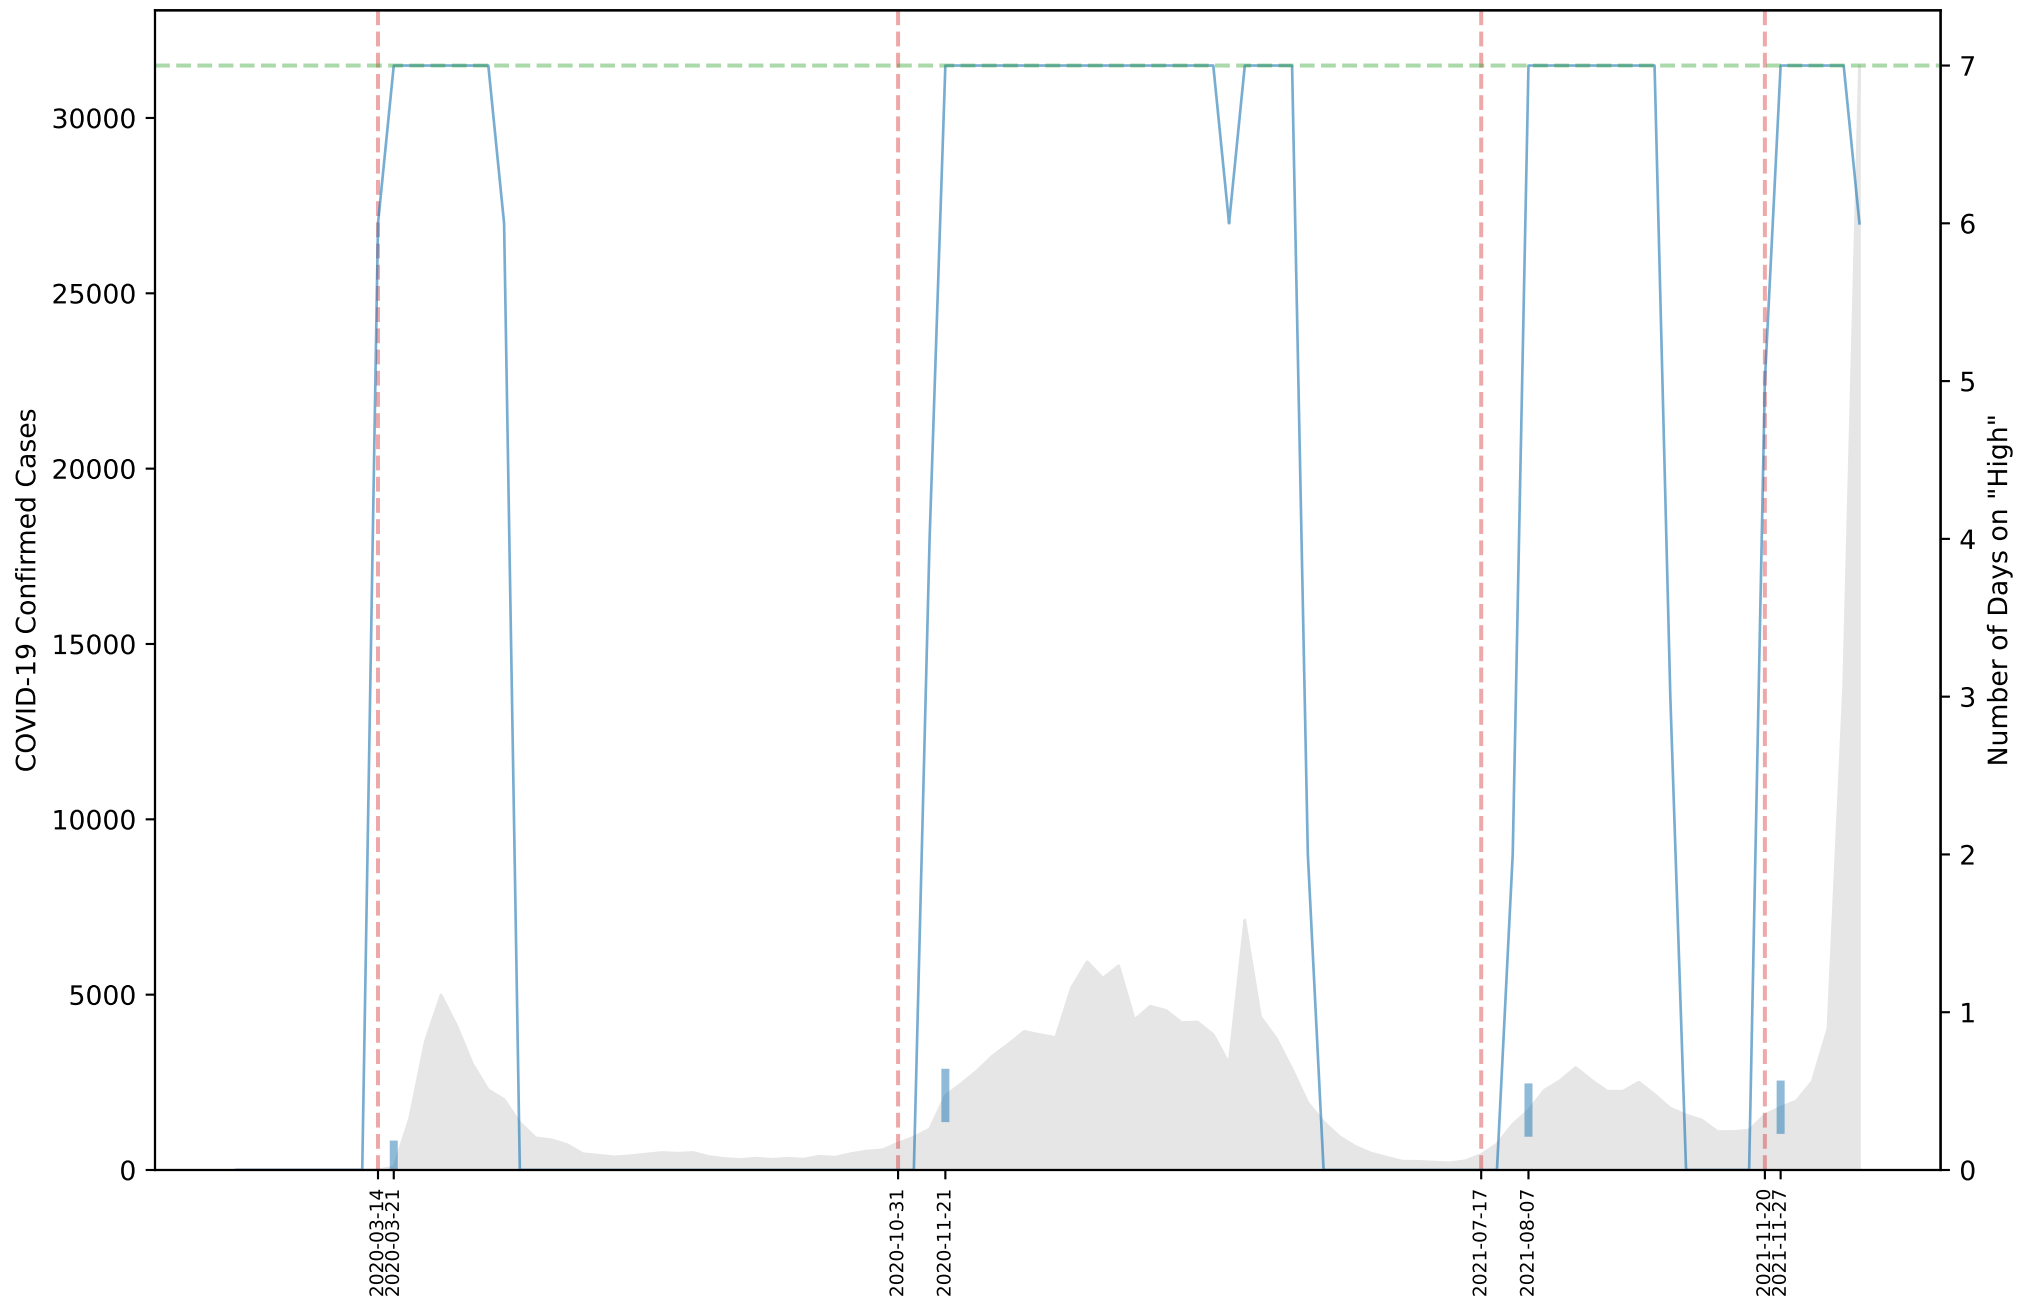

# NY, Queens

S258

- Number of days on 'High' transmission per week
- Threshold to mark the beginning of epidemic event for CDC signal
- CDC beginning of events
- $r_o$  (Parag's method)

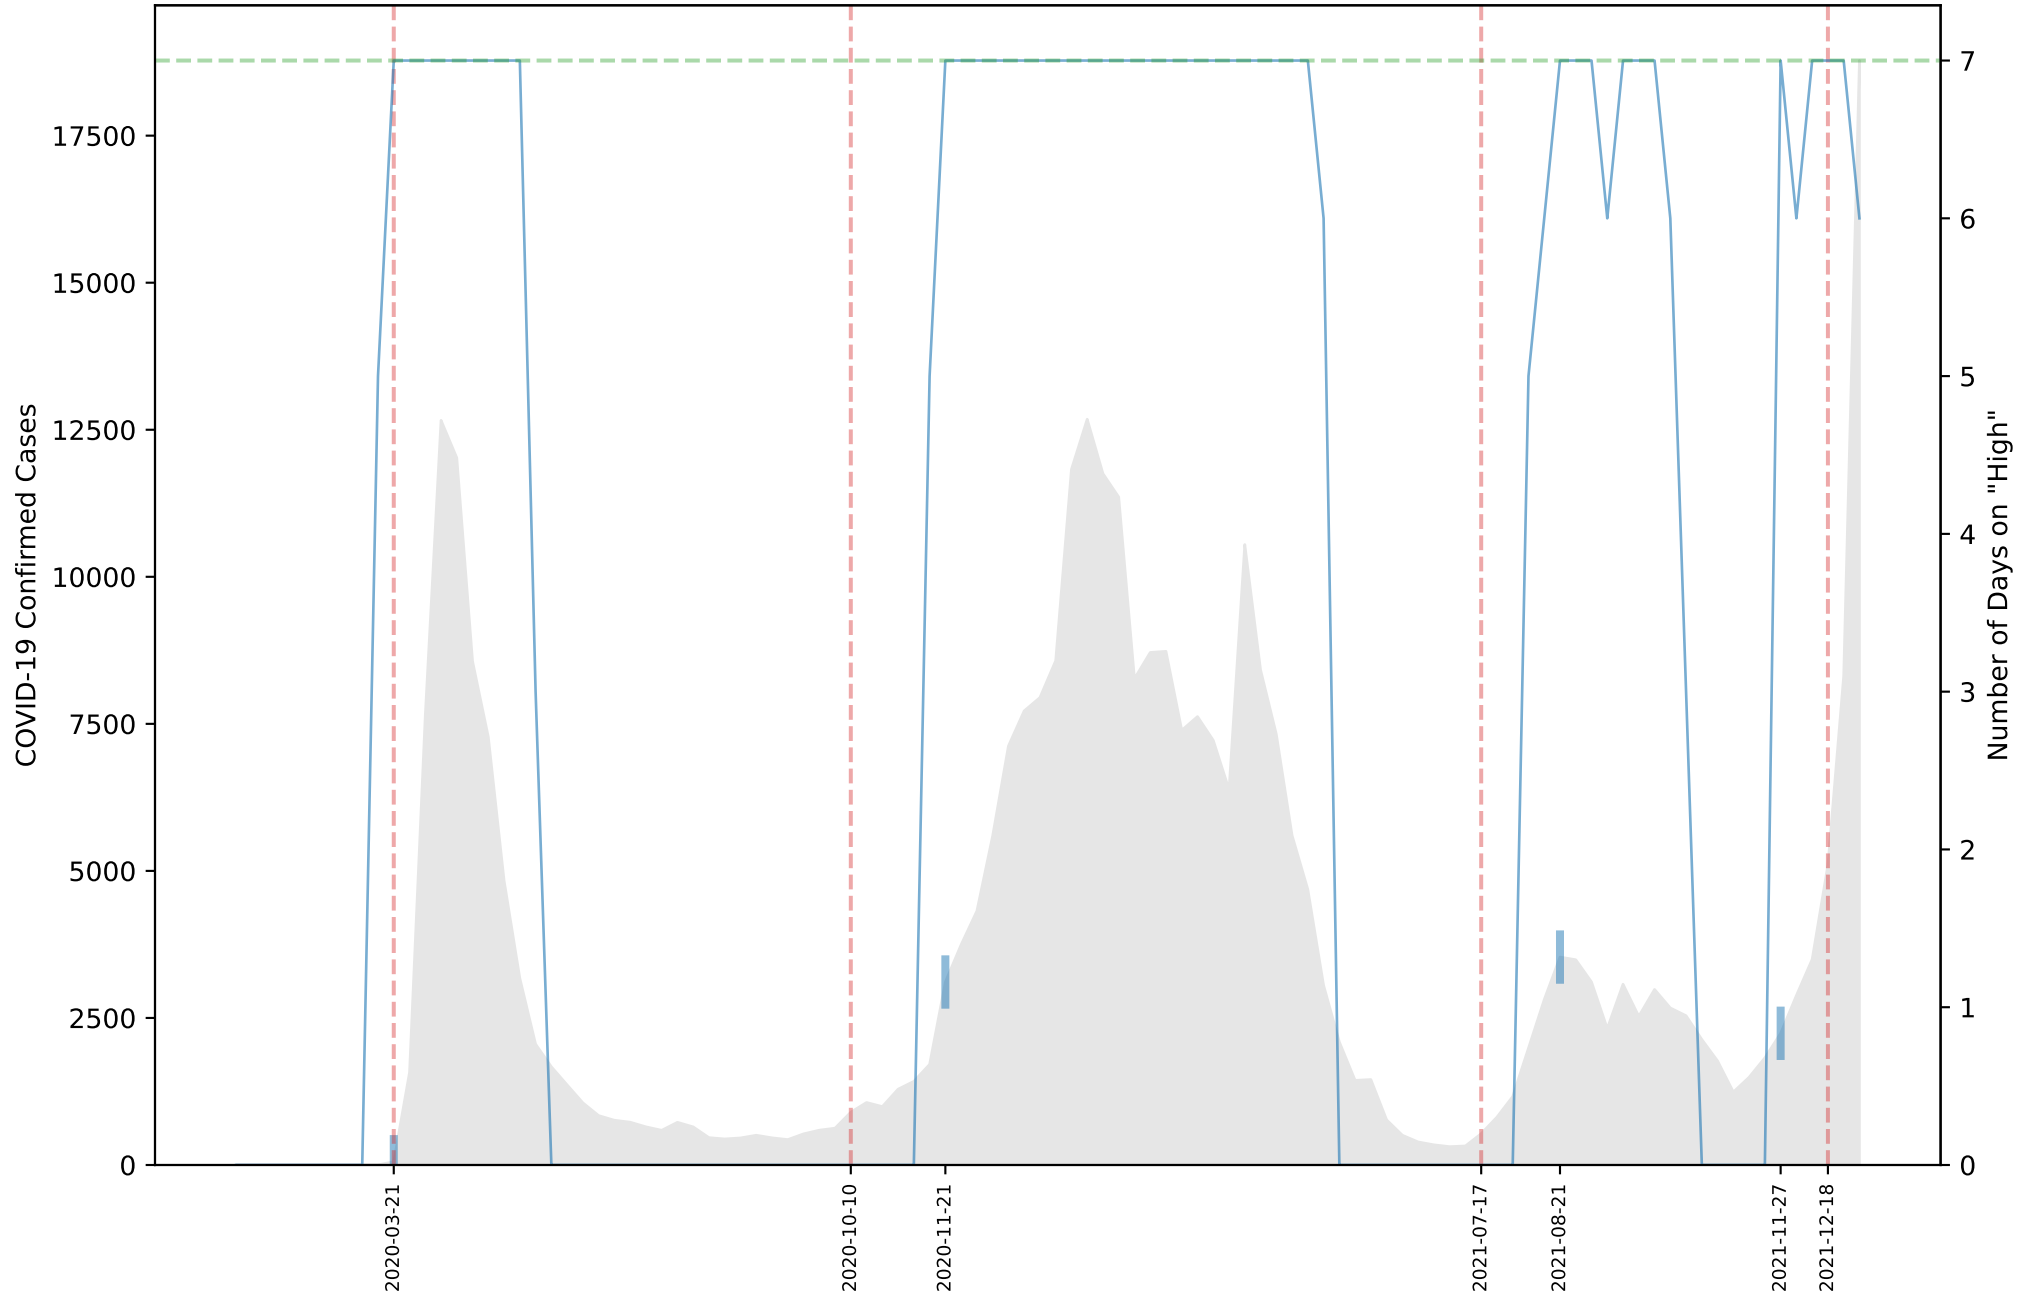

- Number of days on 'High' transmission per week
- - - Threshold to mark the beginning of epidemic event for CDC signal
- █ CDC beginning of events
- - -  $r_o$  (Parag's method)

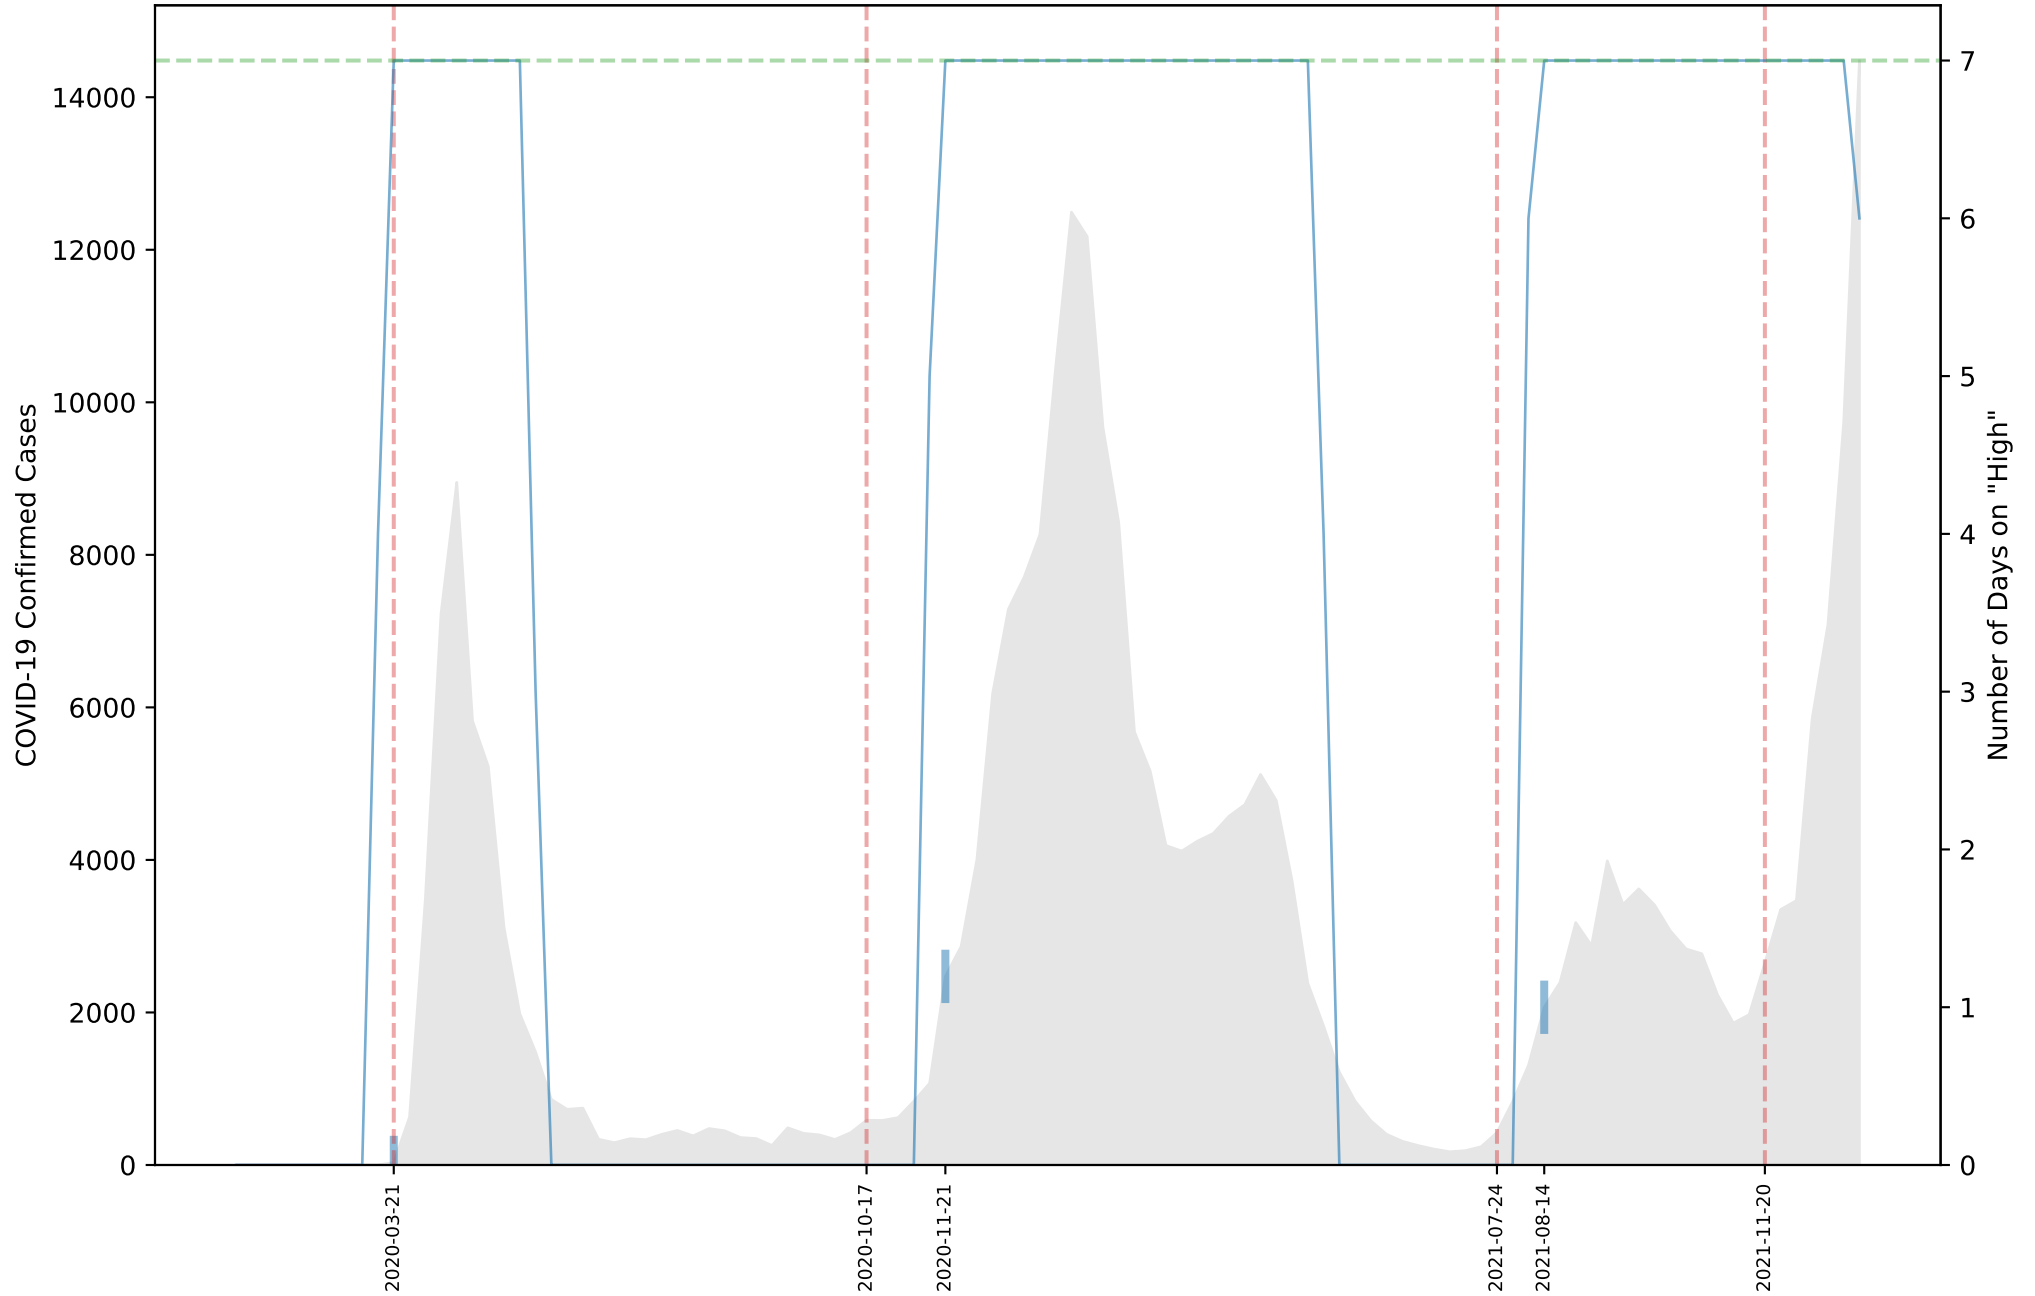

- Number of days on 'High' transmission per week
- - - Threshold to mark the beginning of epidemic event for CDC signal
- █ CDC beginning of events
- - -  $r_o$  (Parag's method)

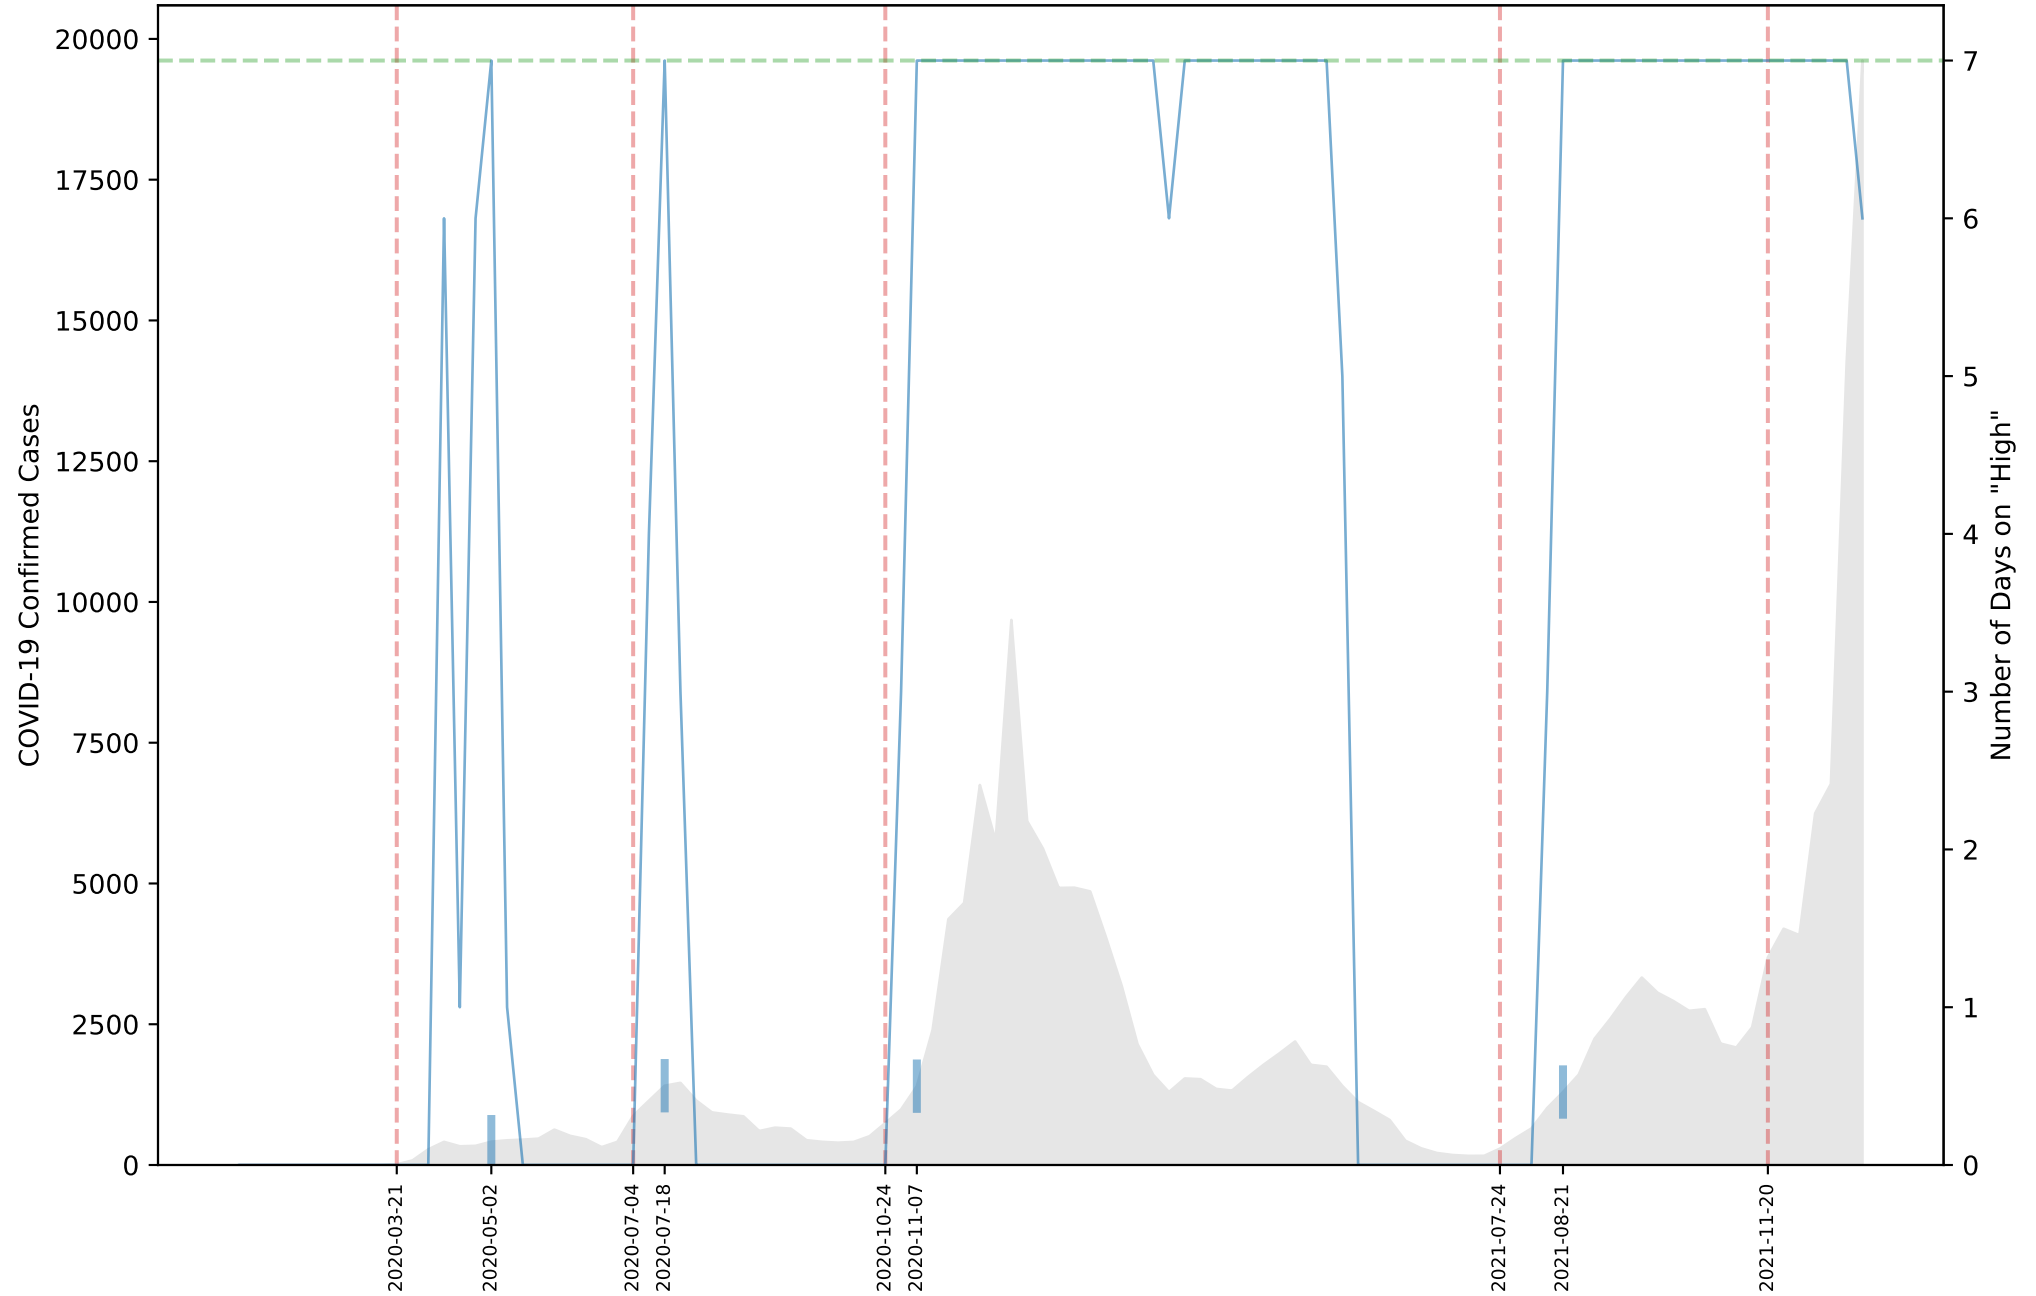

- Number of days on 'High' transmission per week
- - - Threshold to mark the beginning of epidemic event for CDC signal
- ▮ CDC beginning of events
- - -  $r_o$  (Parag's method)

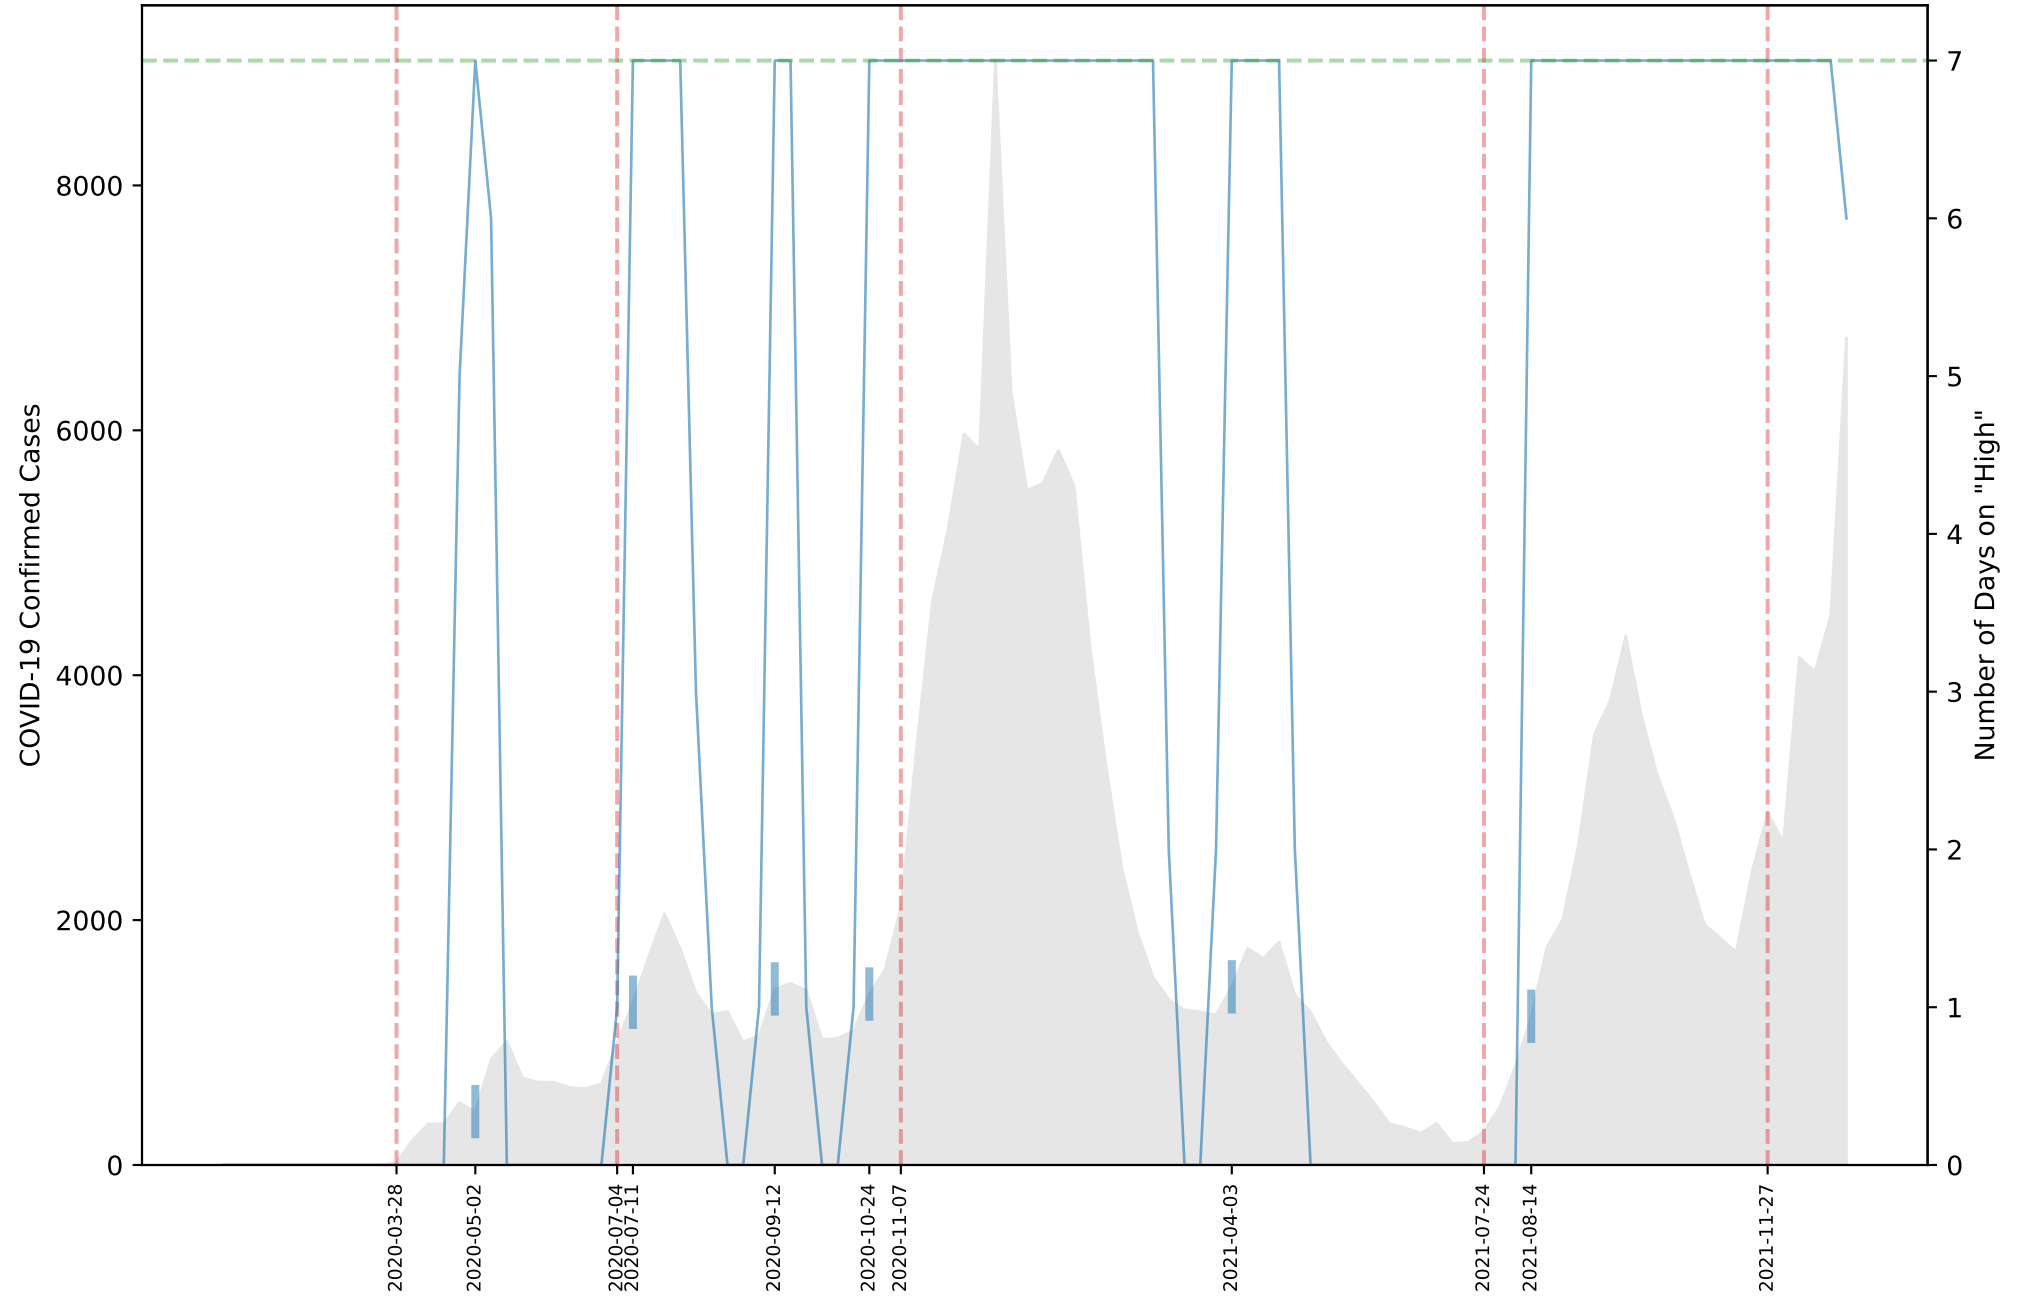

- Number of days on 'High' transmission per week
- - - Threshold to mark the beginning of epidemic event for CDC signal
- █ CDC beginning of events
- - -  $r_o$  (Parag's method)

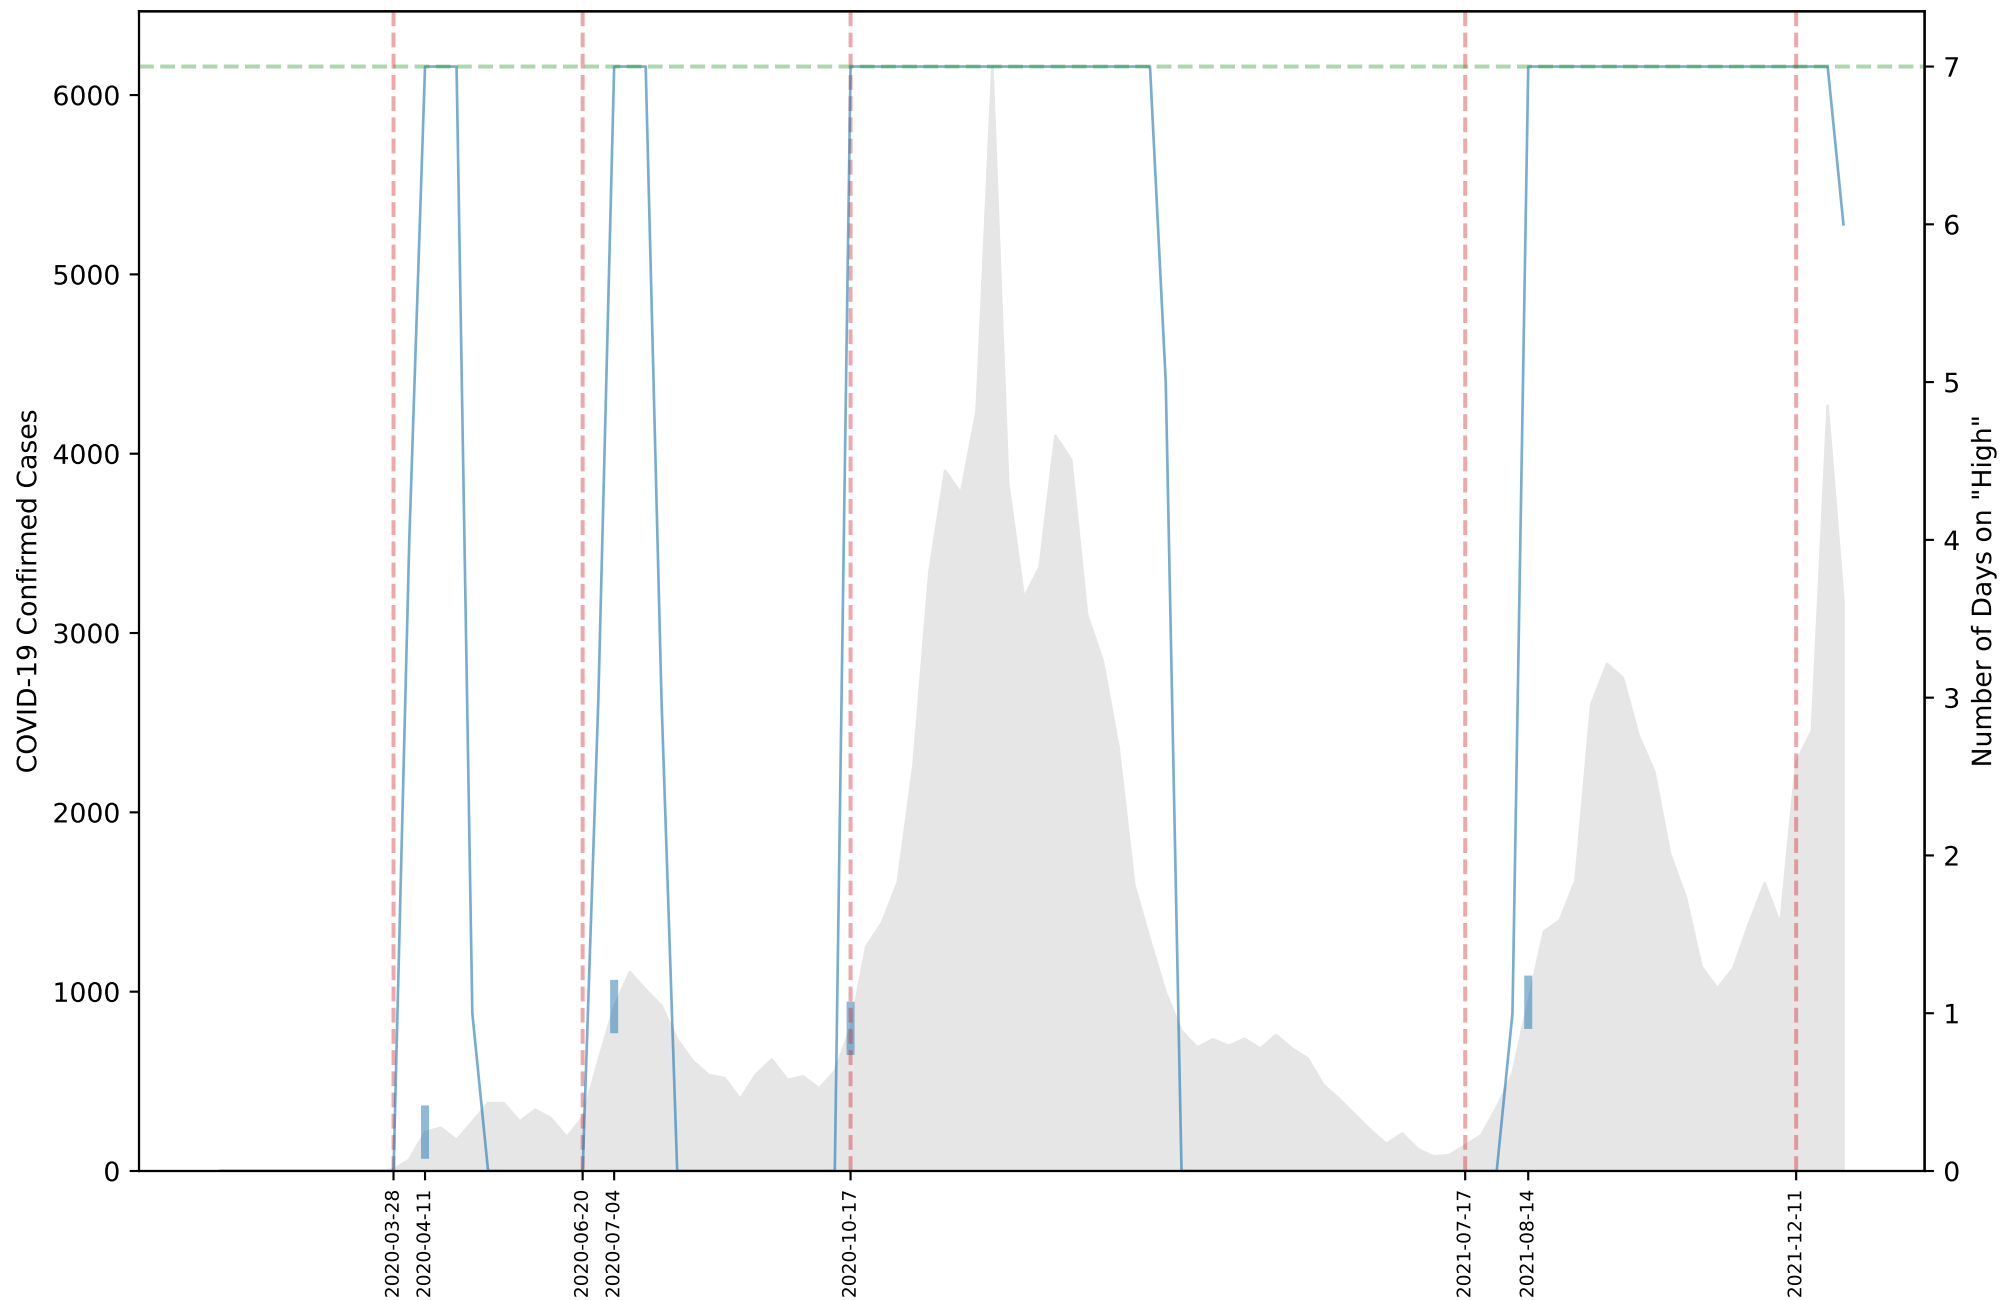



- Number of days on 'High' transmission per week
- - - Threshold to mark the beginning of epidemic event for CDC signal
- █ CDC beginning of events
- - -  $r_o$  (Parag's method)

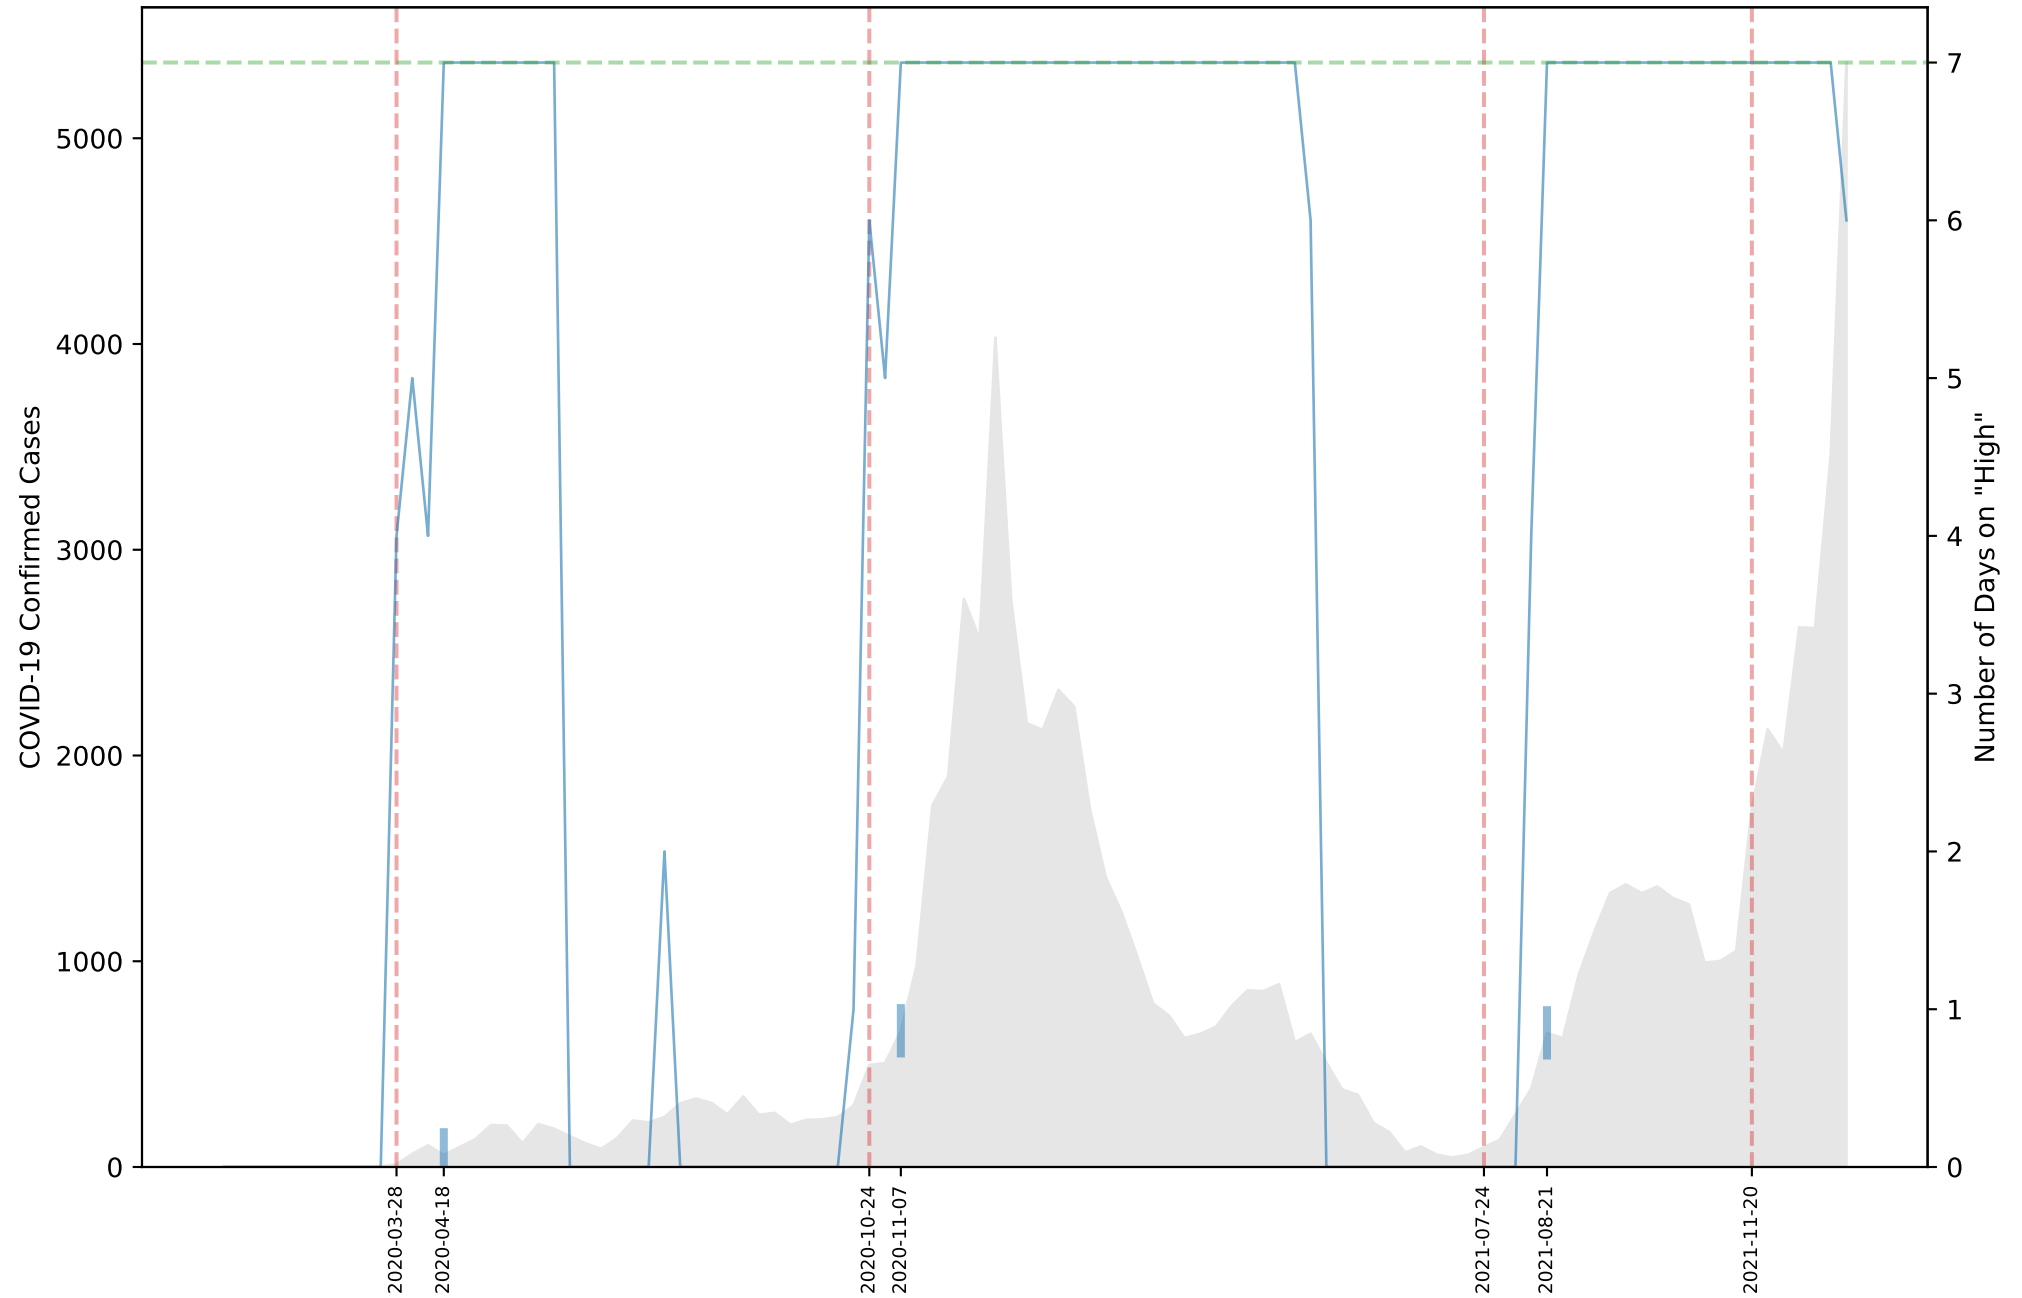

- Number of days on 'High' transmission per week
- - - Threshold to mark the beginning of epidemic event for CDC signal
- █ CDC beginning of events
- - -  $r_o$  (Parag's method)

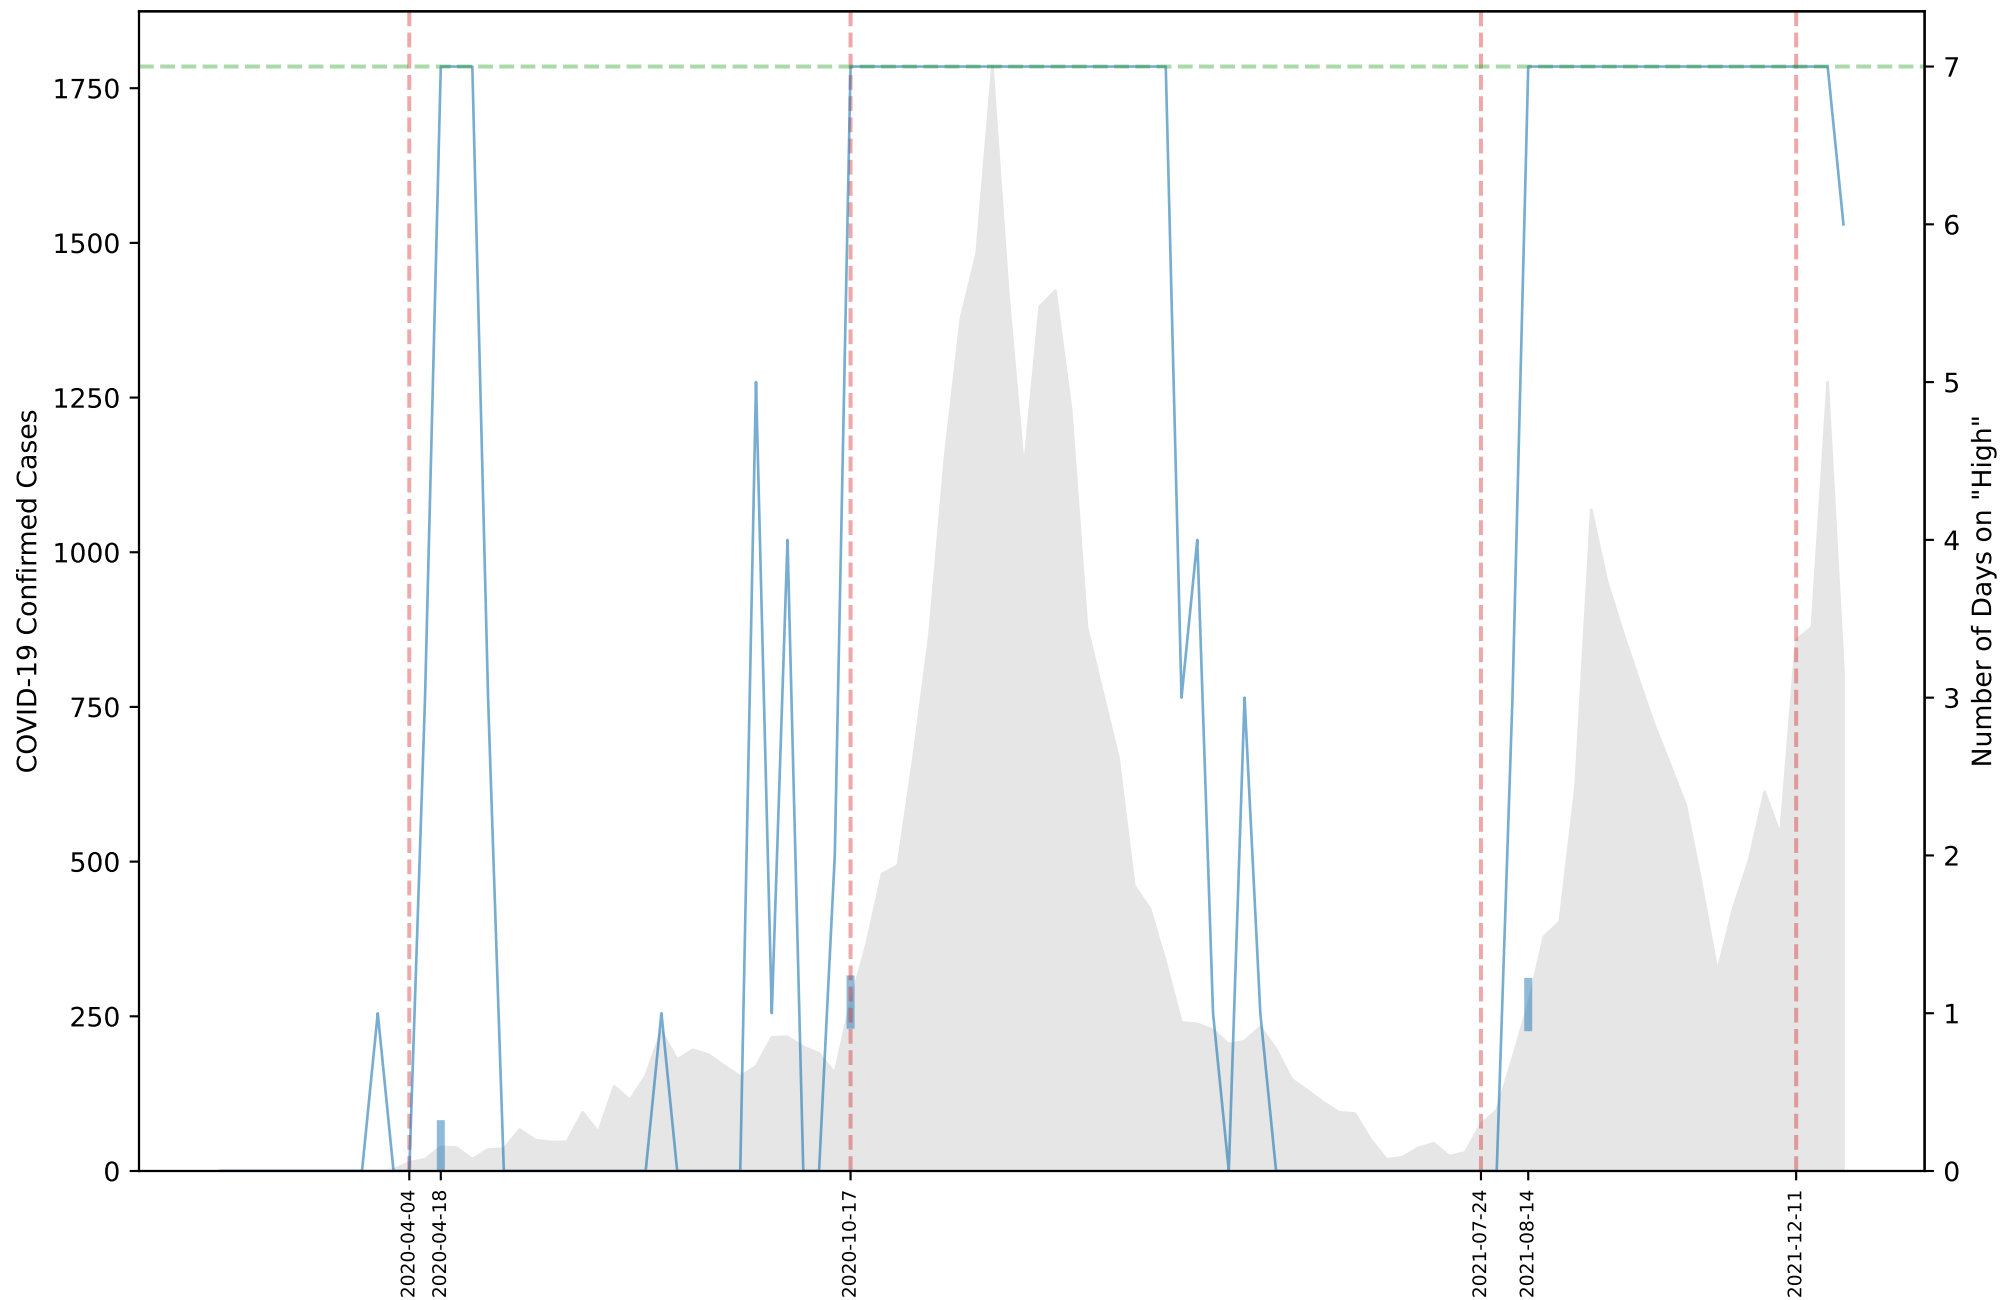

# OR, Multnomah

S265

- Number of days on 'High' transmission per week
- - - Threshold to mark the beginning of epidemic event for CDC signal
- █ CDC beginning of events
- - -  $r_o$  (Parag's method)

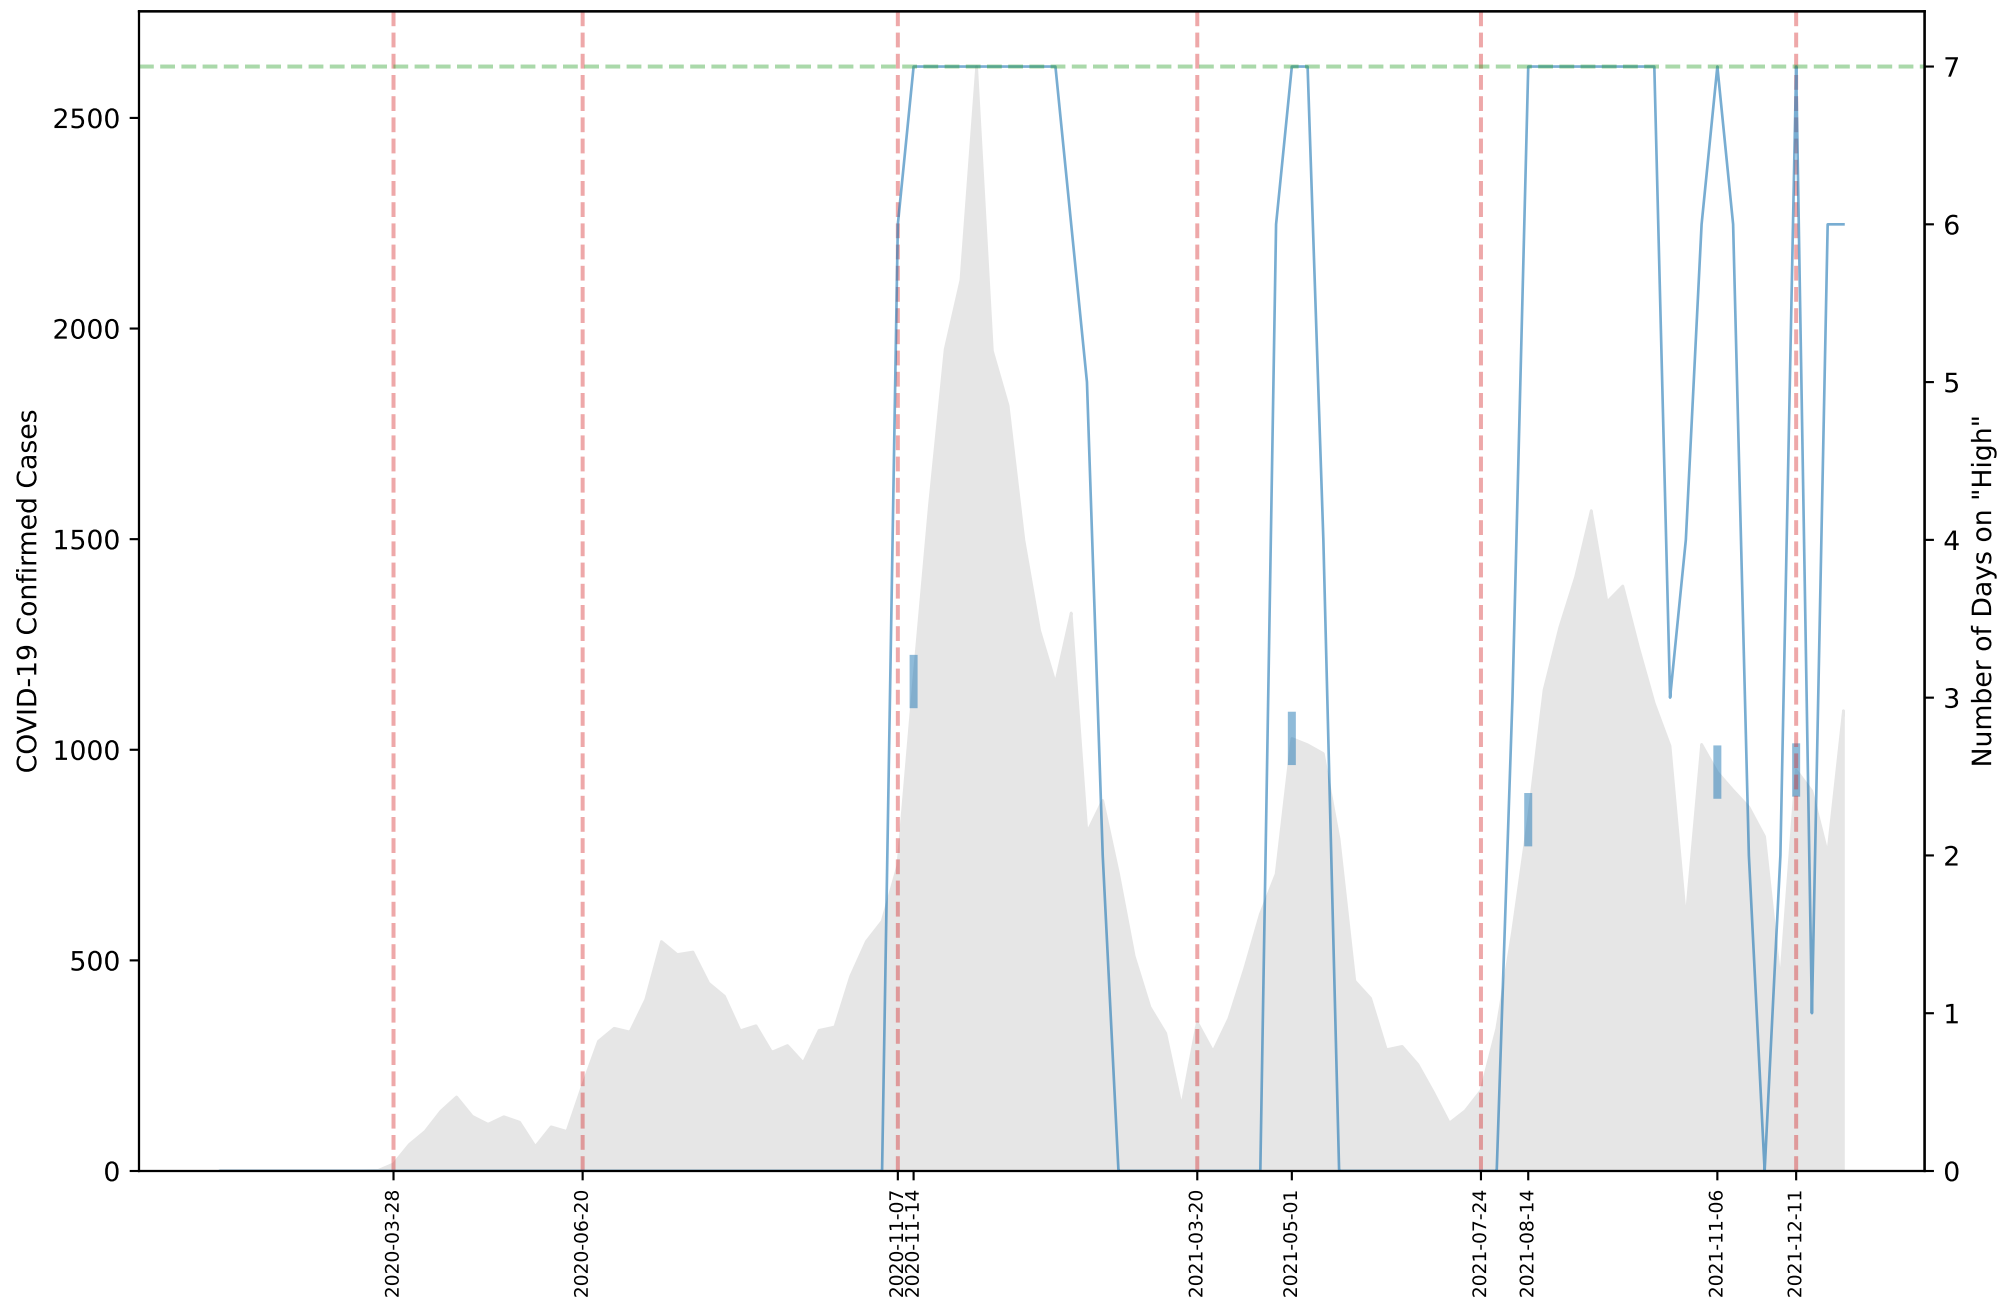

- Number of days on 'High' transmission per week
- - - Threshold to mark the beginning of epidemic event for CDC signal
- █ CDC beginning of events
- - -  $r_o$  (Parag's method)

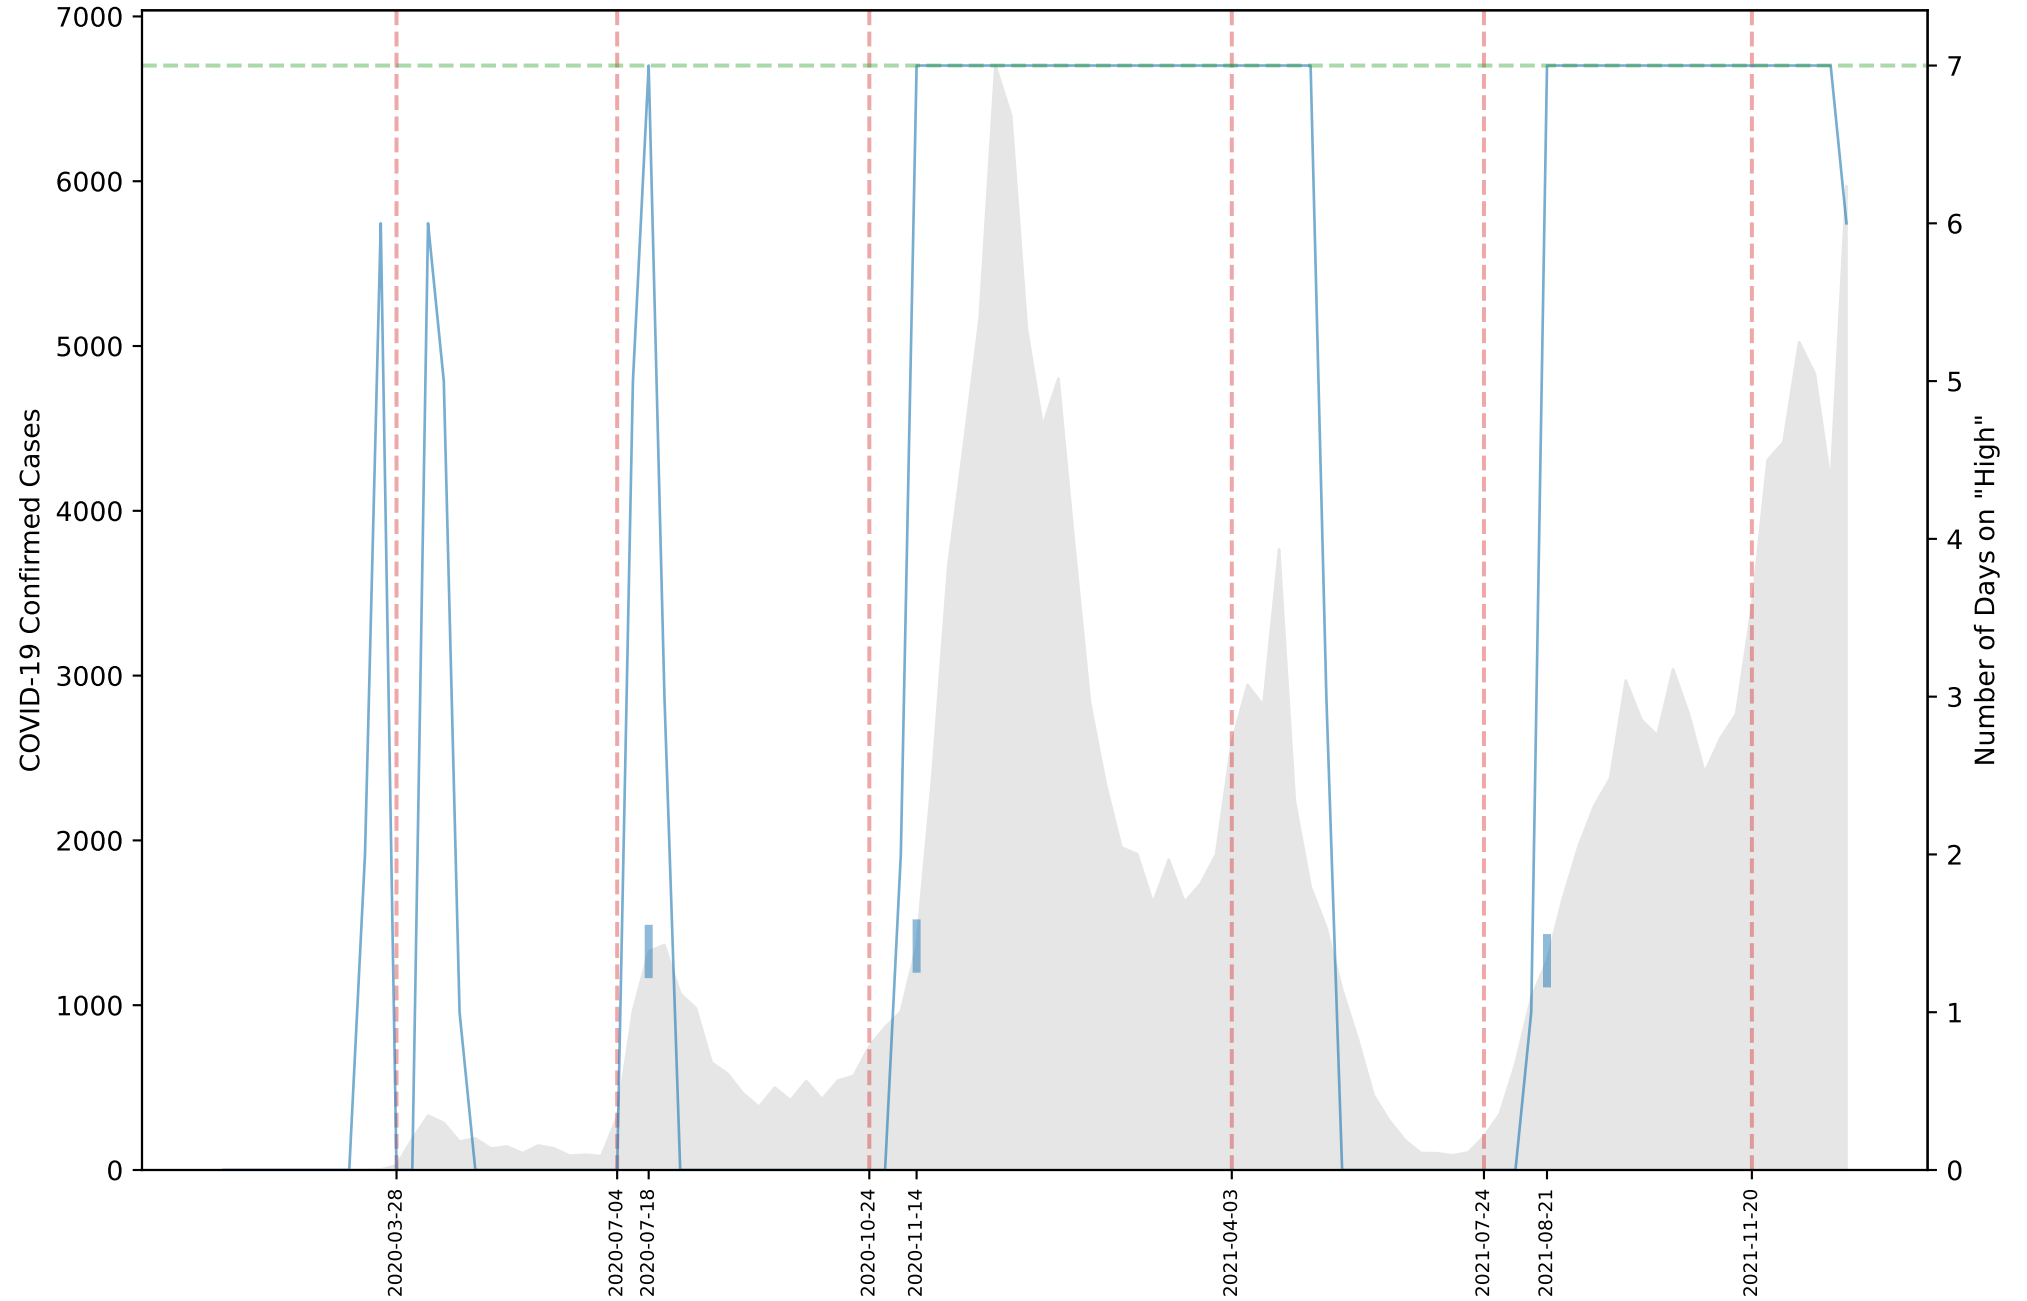

# PA, Philadelphia

S267

- Number of days on 'High' transmission per week
- - - Threshold to mark the beginning of epidemic event for CDC signal
- █ CDC beginning of events
- - -  $r_o$  (Parag's method)

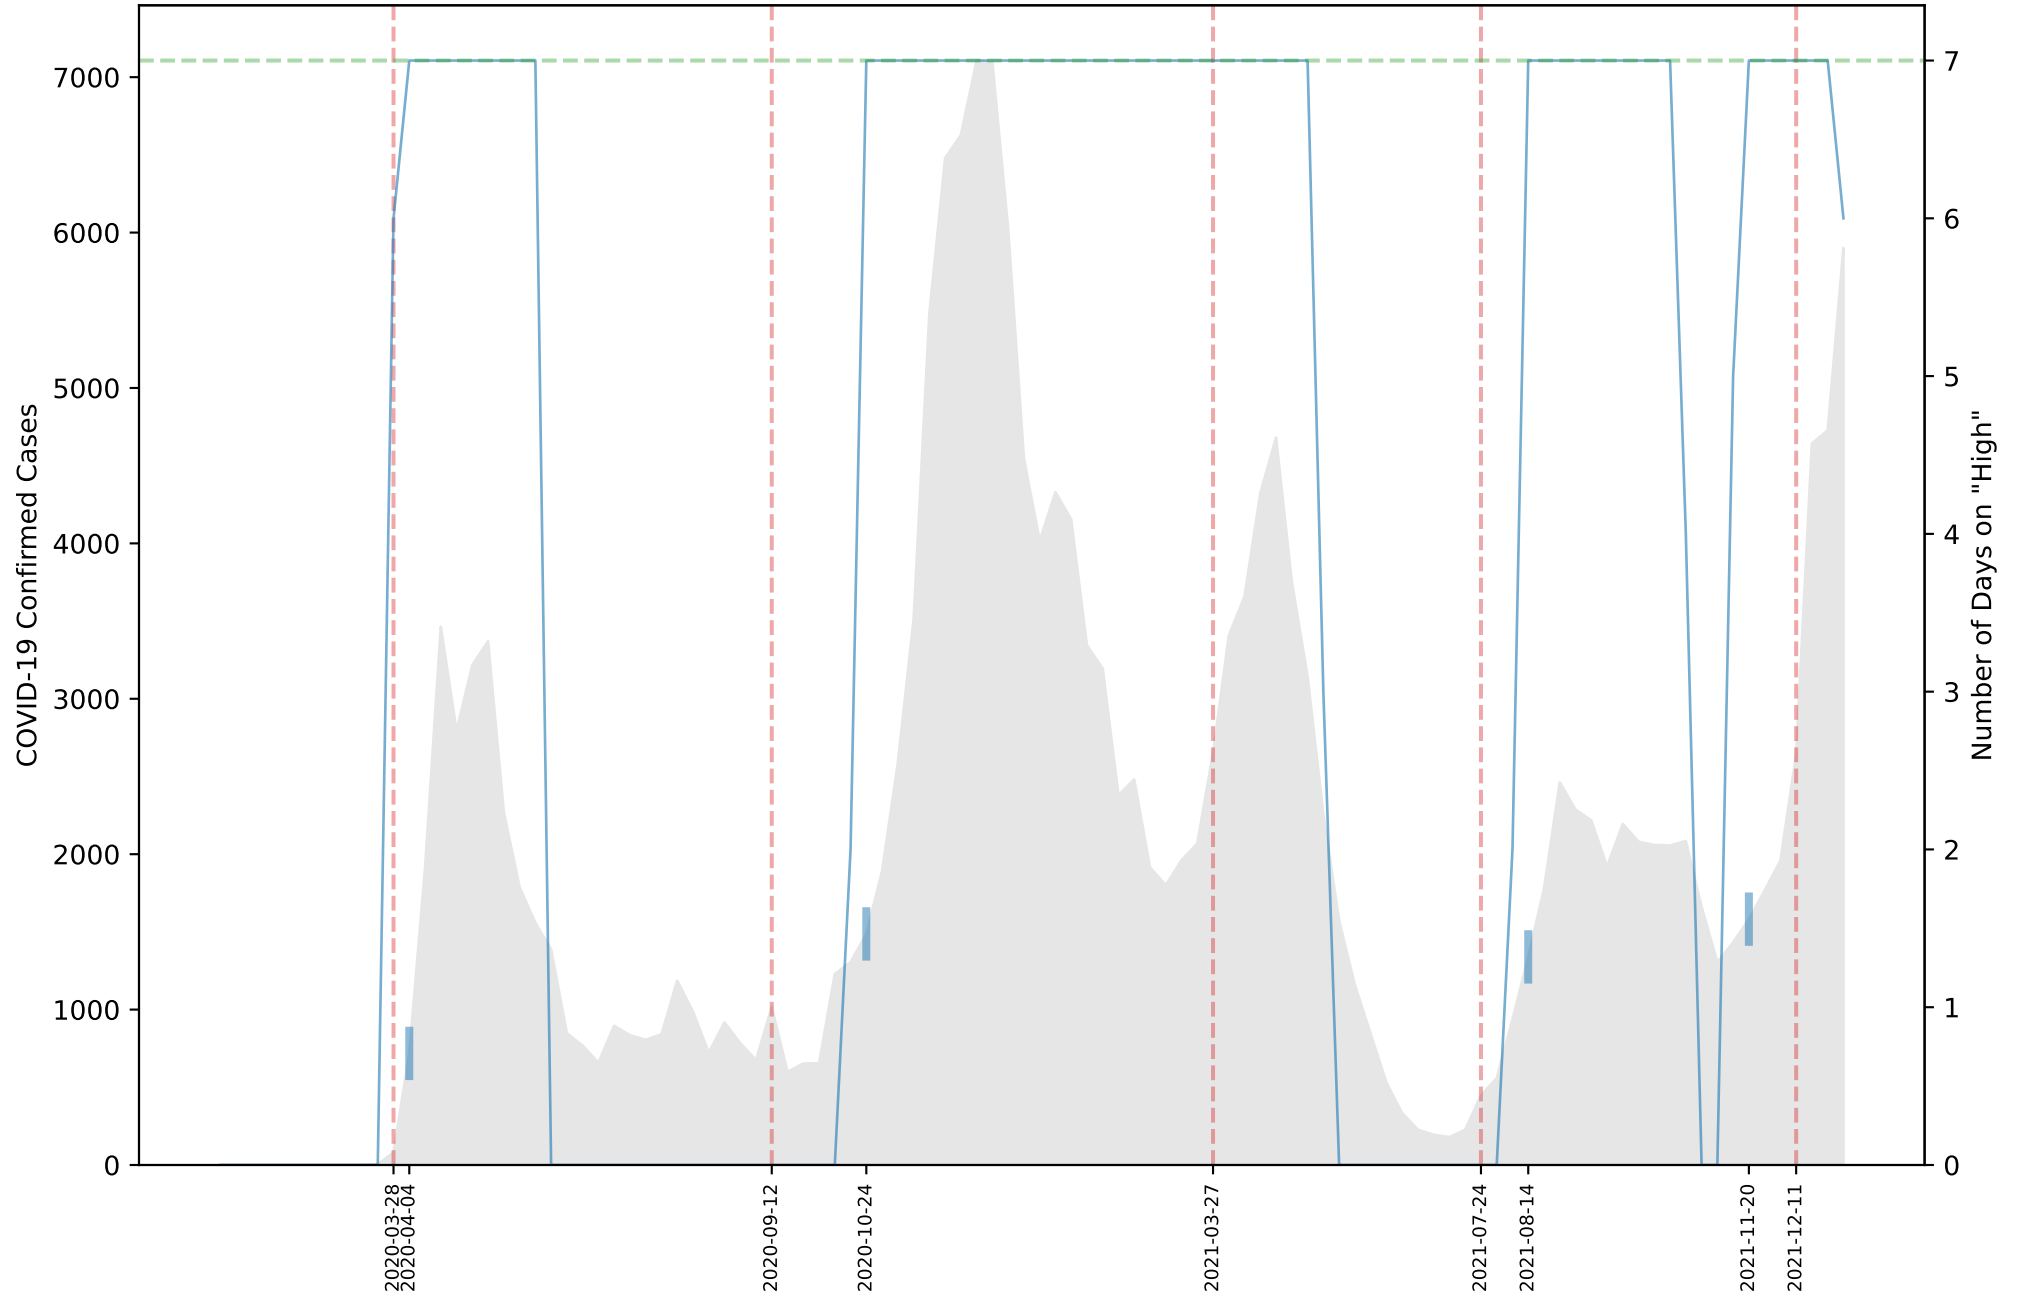

- Number of days on 'High' transmission per week
- - - Threshold to mark the beginning of epidemic event for CDC signal
- █ CDC beginning of events
- - -  $r_o$  (Parag's method)

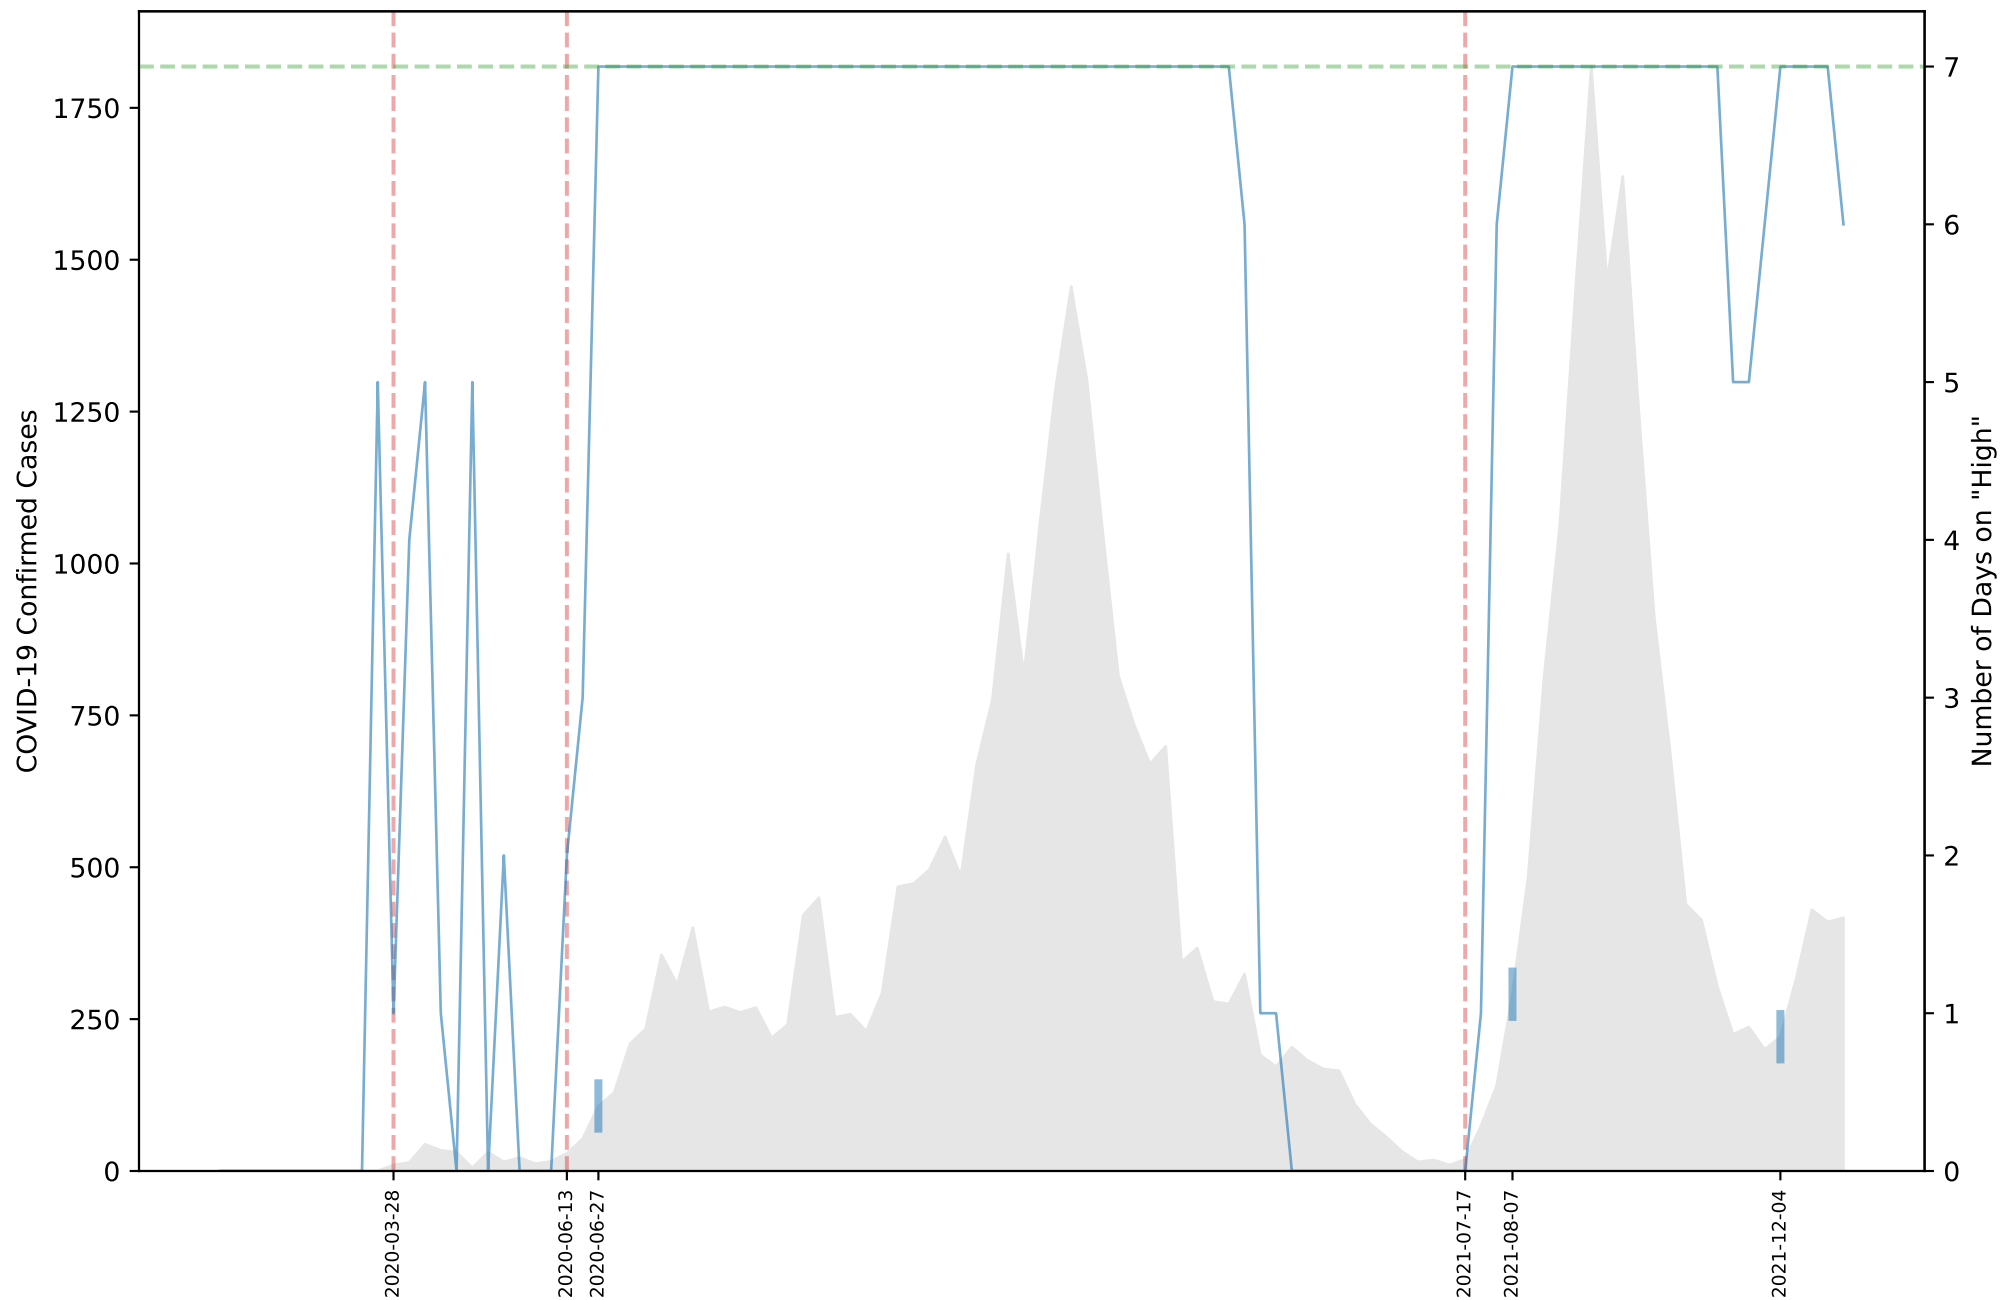

- Number of days on 'High' transmission per week
- - - Threshold to mark the beginning of epidemic event for CDC signal
- █ CDC beginning of events
- - -  $r_o$  (Parag's method)

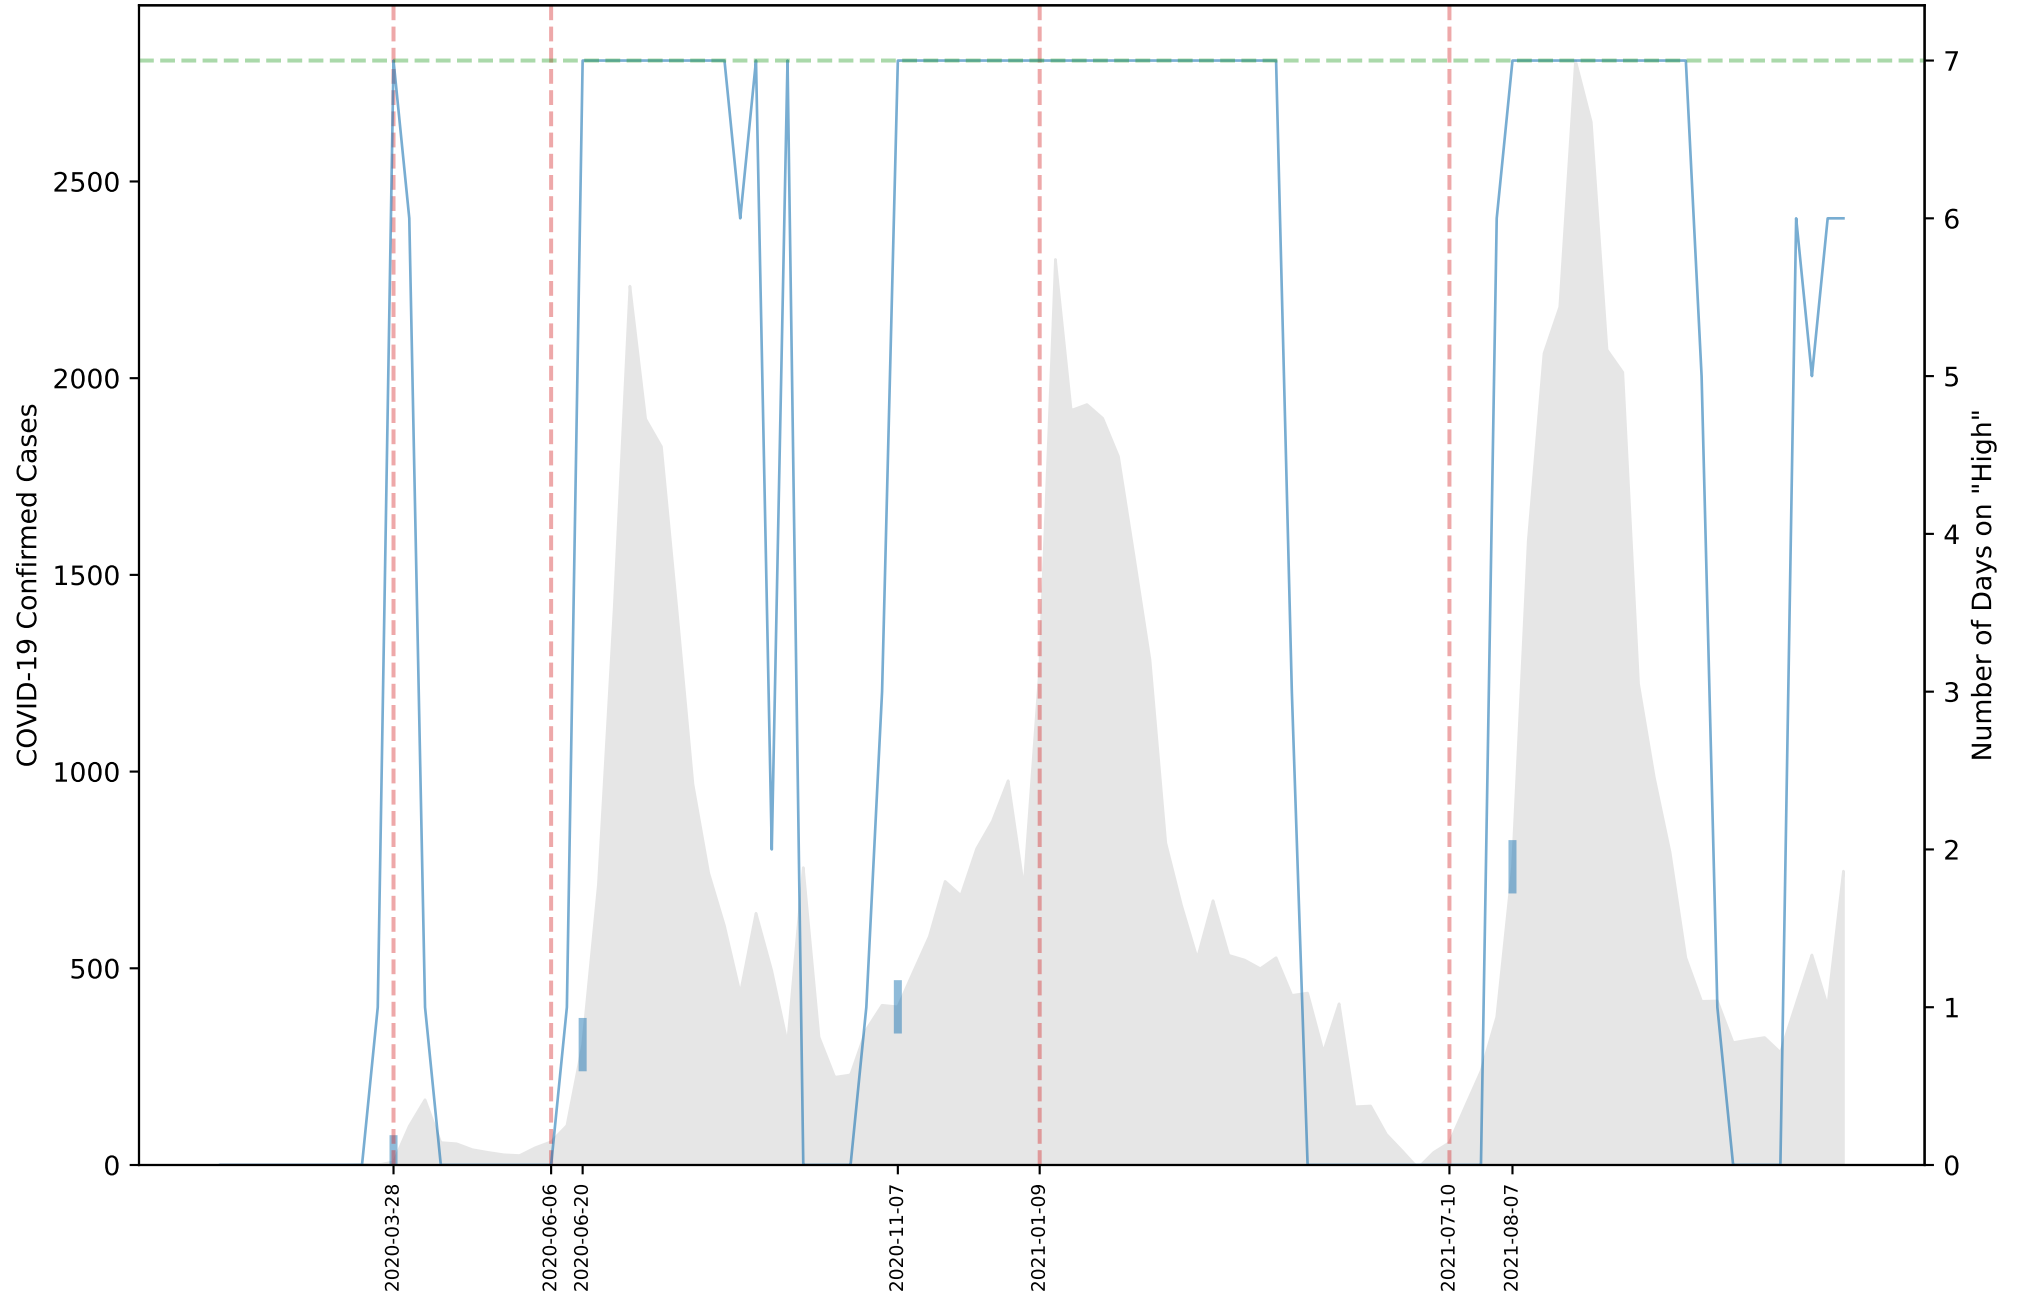

- Number of days on 'High' transmission per week
- - - Threshold to mark the beginning of epidemic event for CDC signal
- █ CDC beginning of events
- - -  $r_o$  (Parag's method)

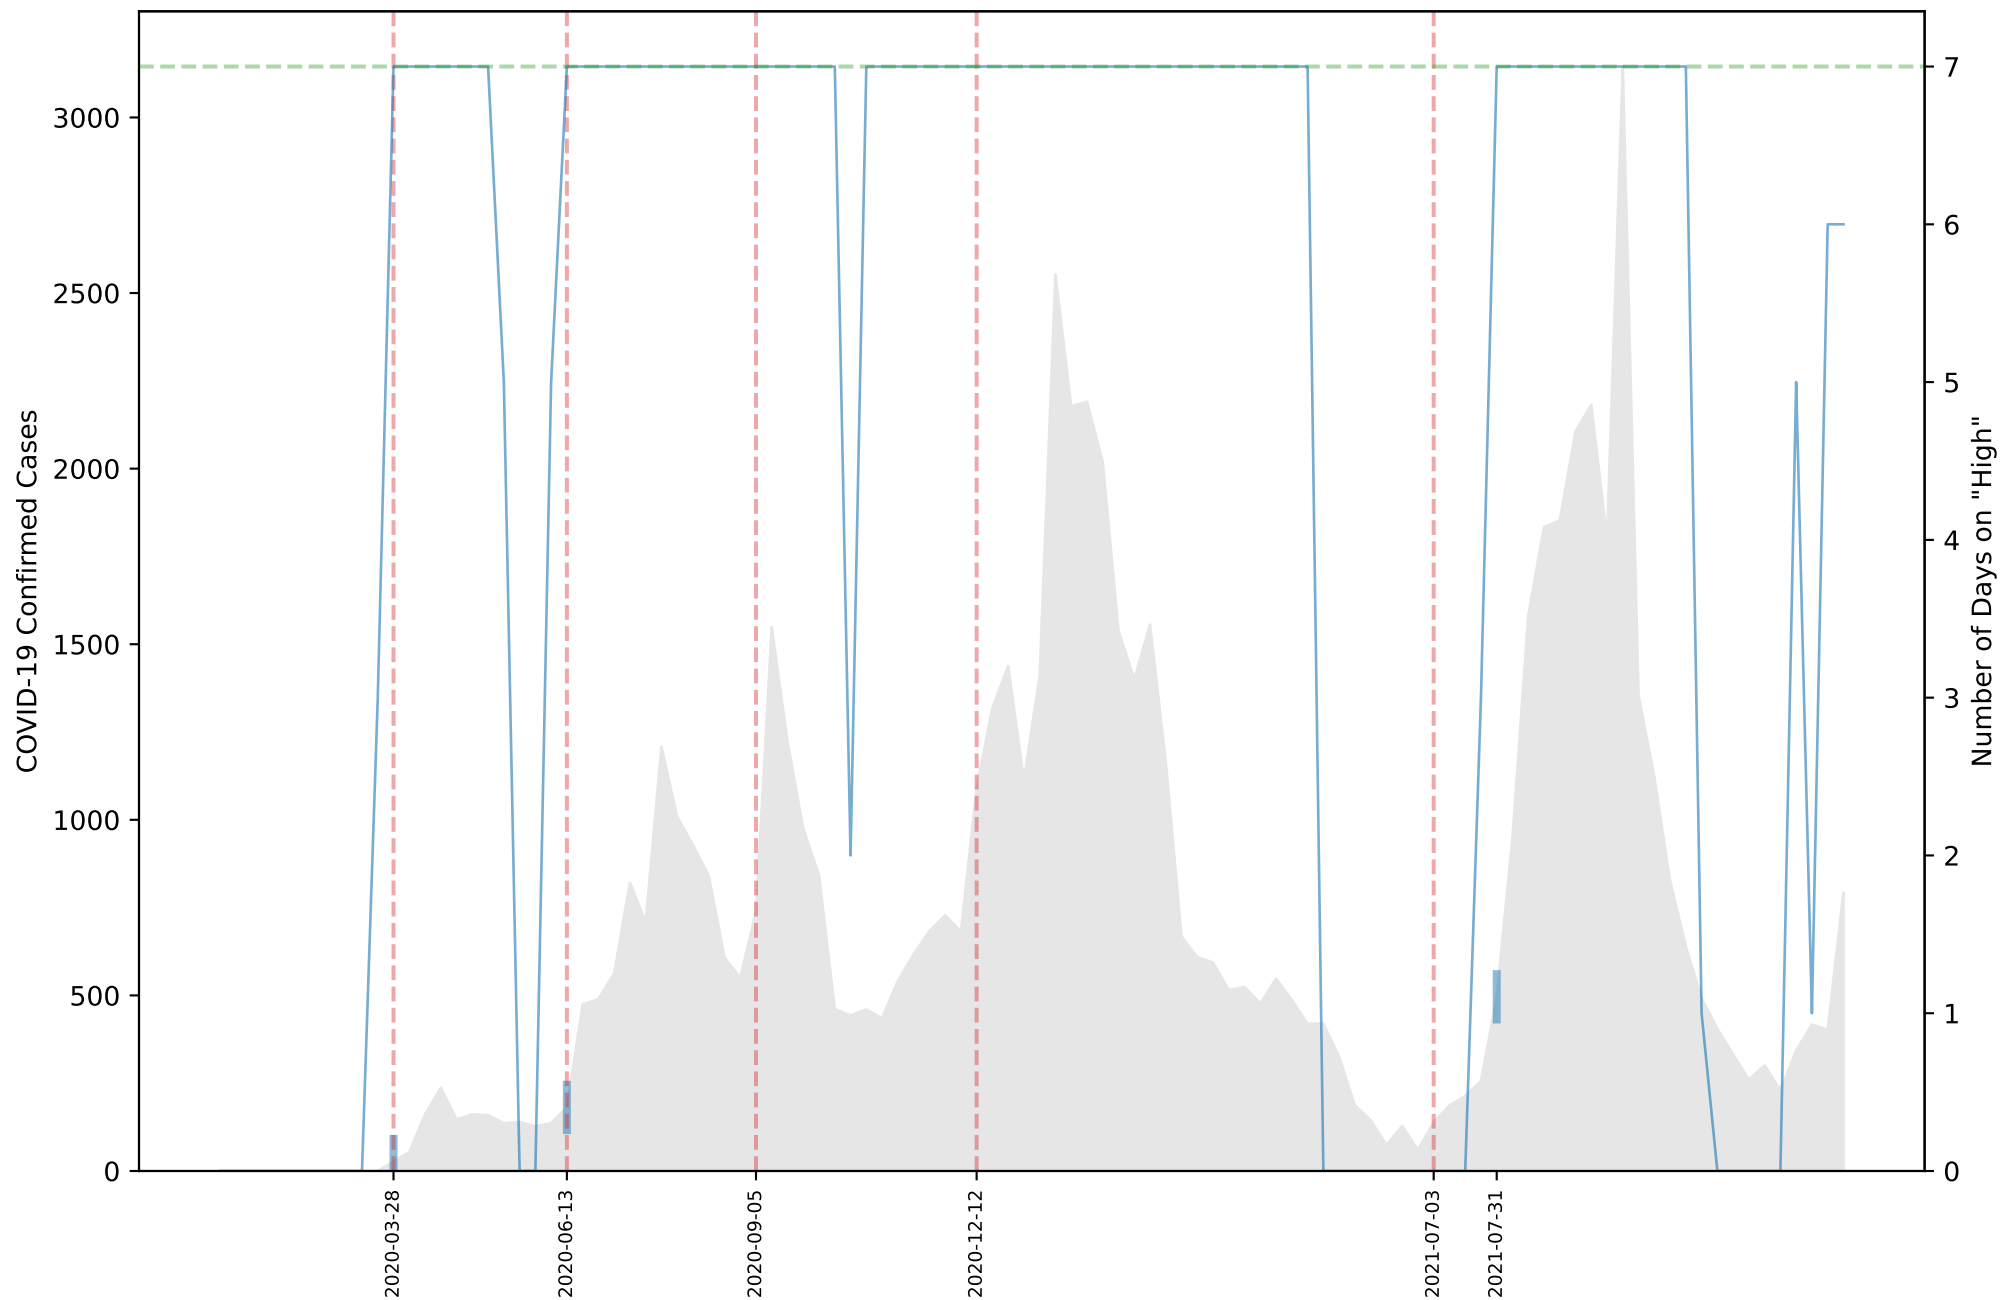



- Number of days on 'High' transmission per week
- - - Threshold to mark the beginning of epidemic event for CDC signal
- █ CDC beginning of events
- - -  $r_o$  (Parag's method)

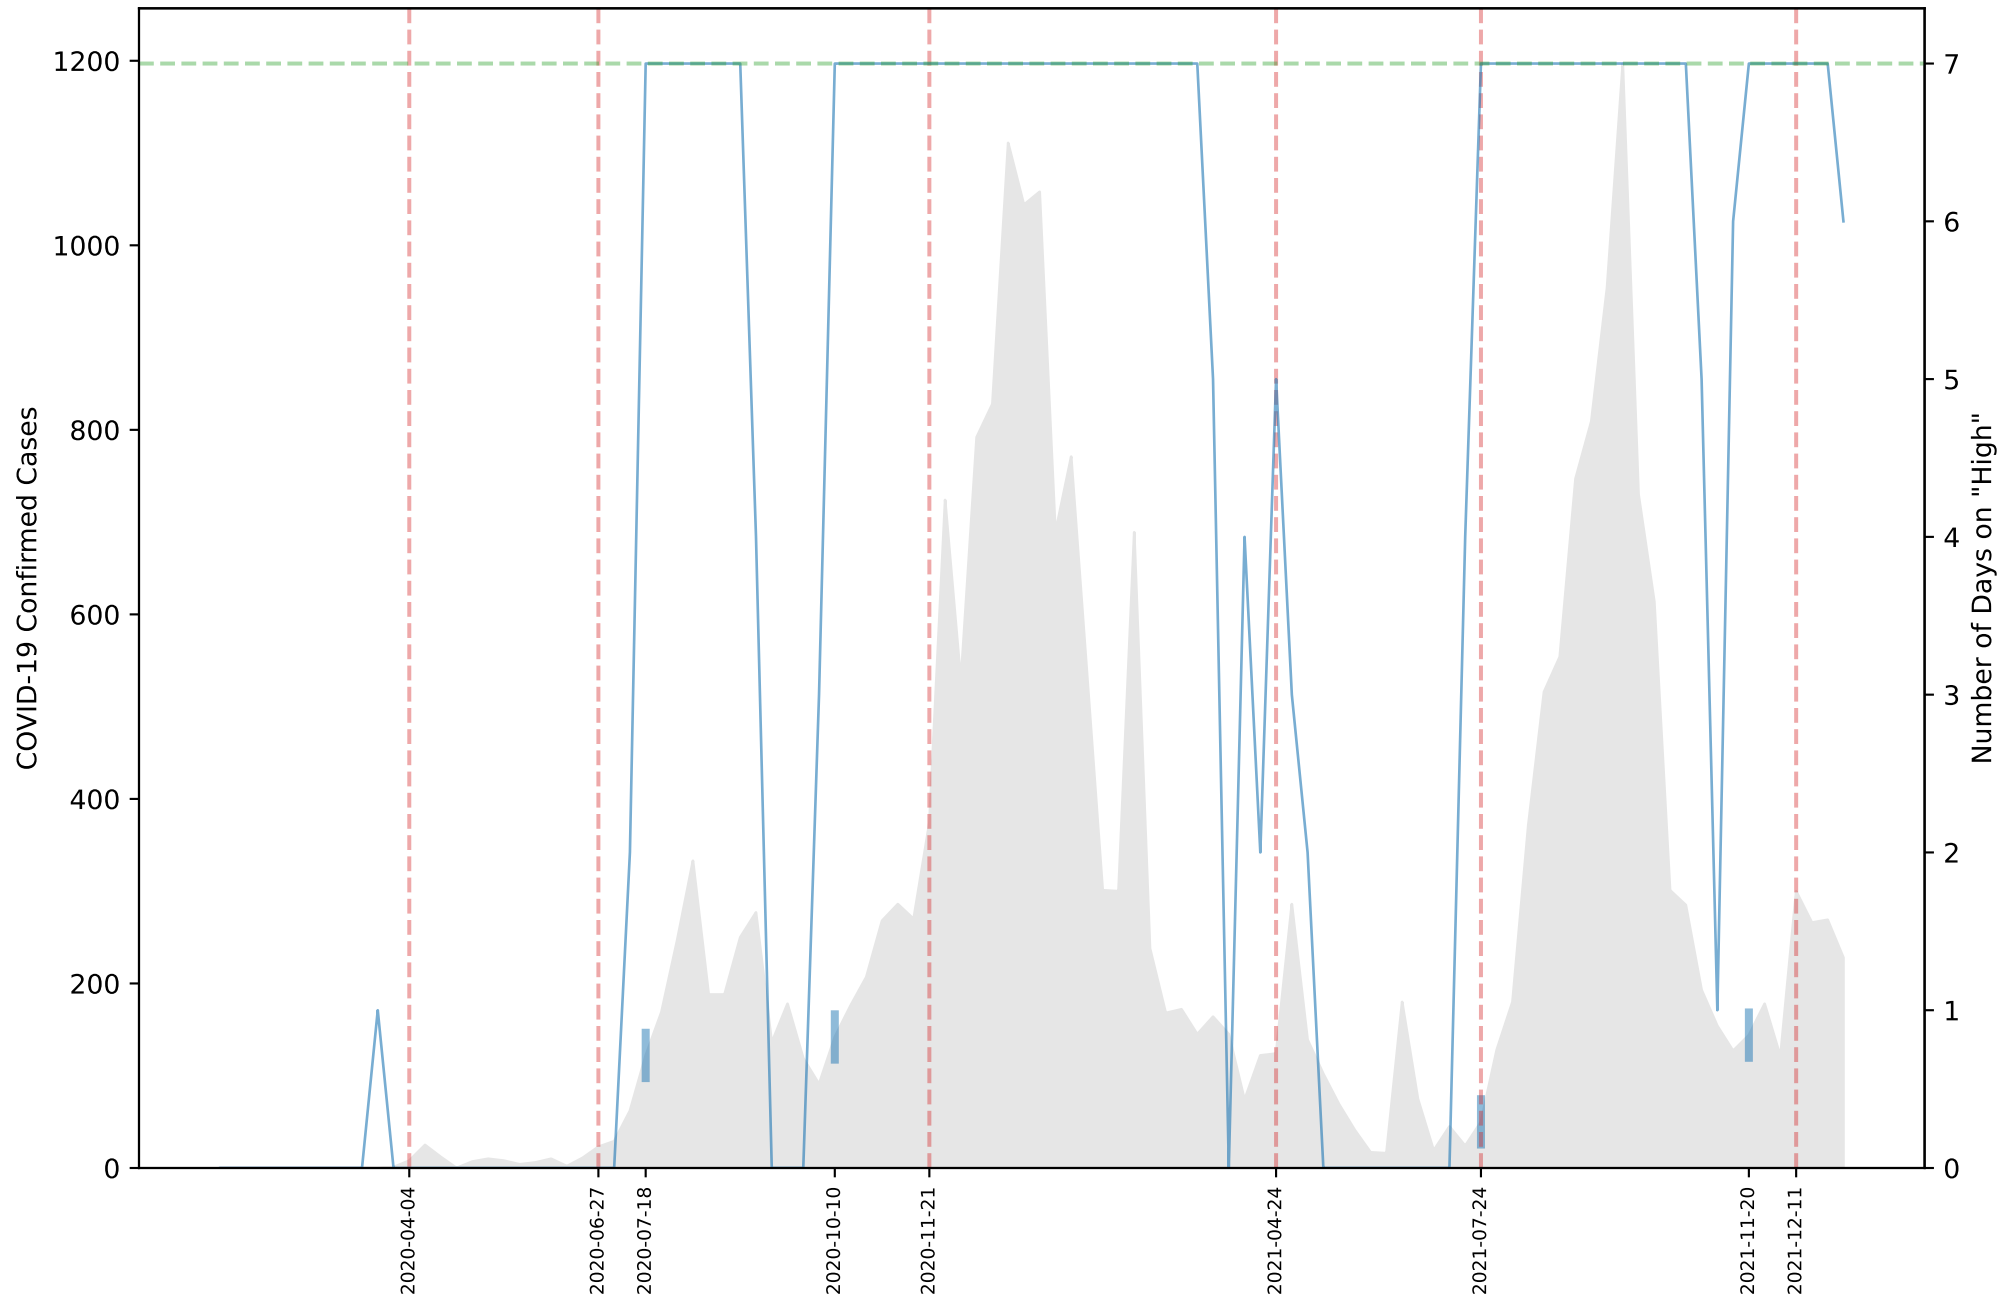

- Number of days on 'High' transmission per week
- - - Threshold to mark the beginning of epidemic event for CDC signal
- █ CDC beginning of events
- - -  $r_o$  (Parag's method)

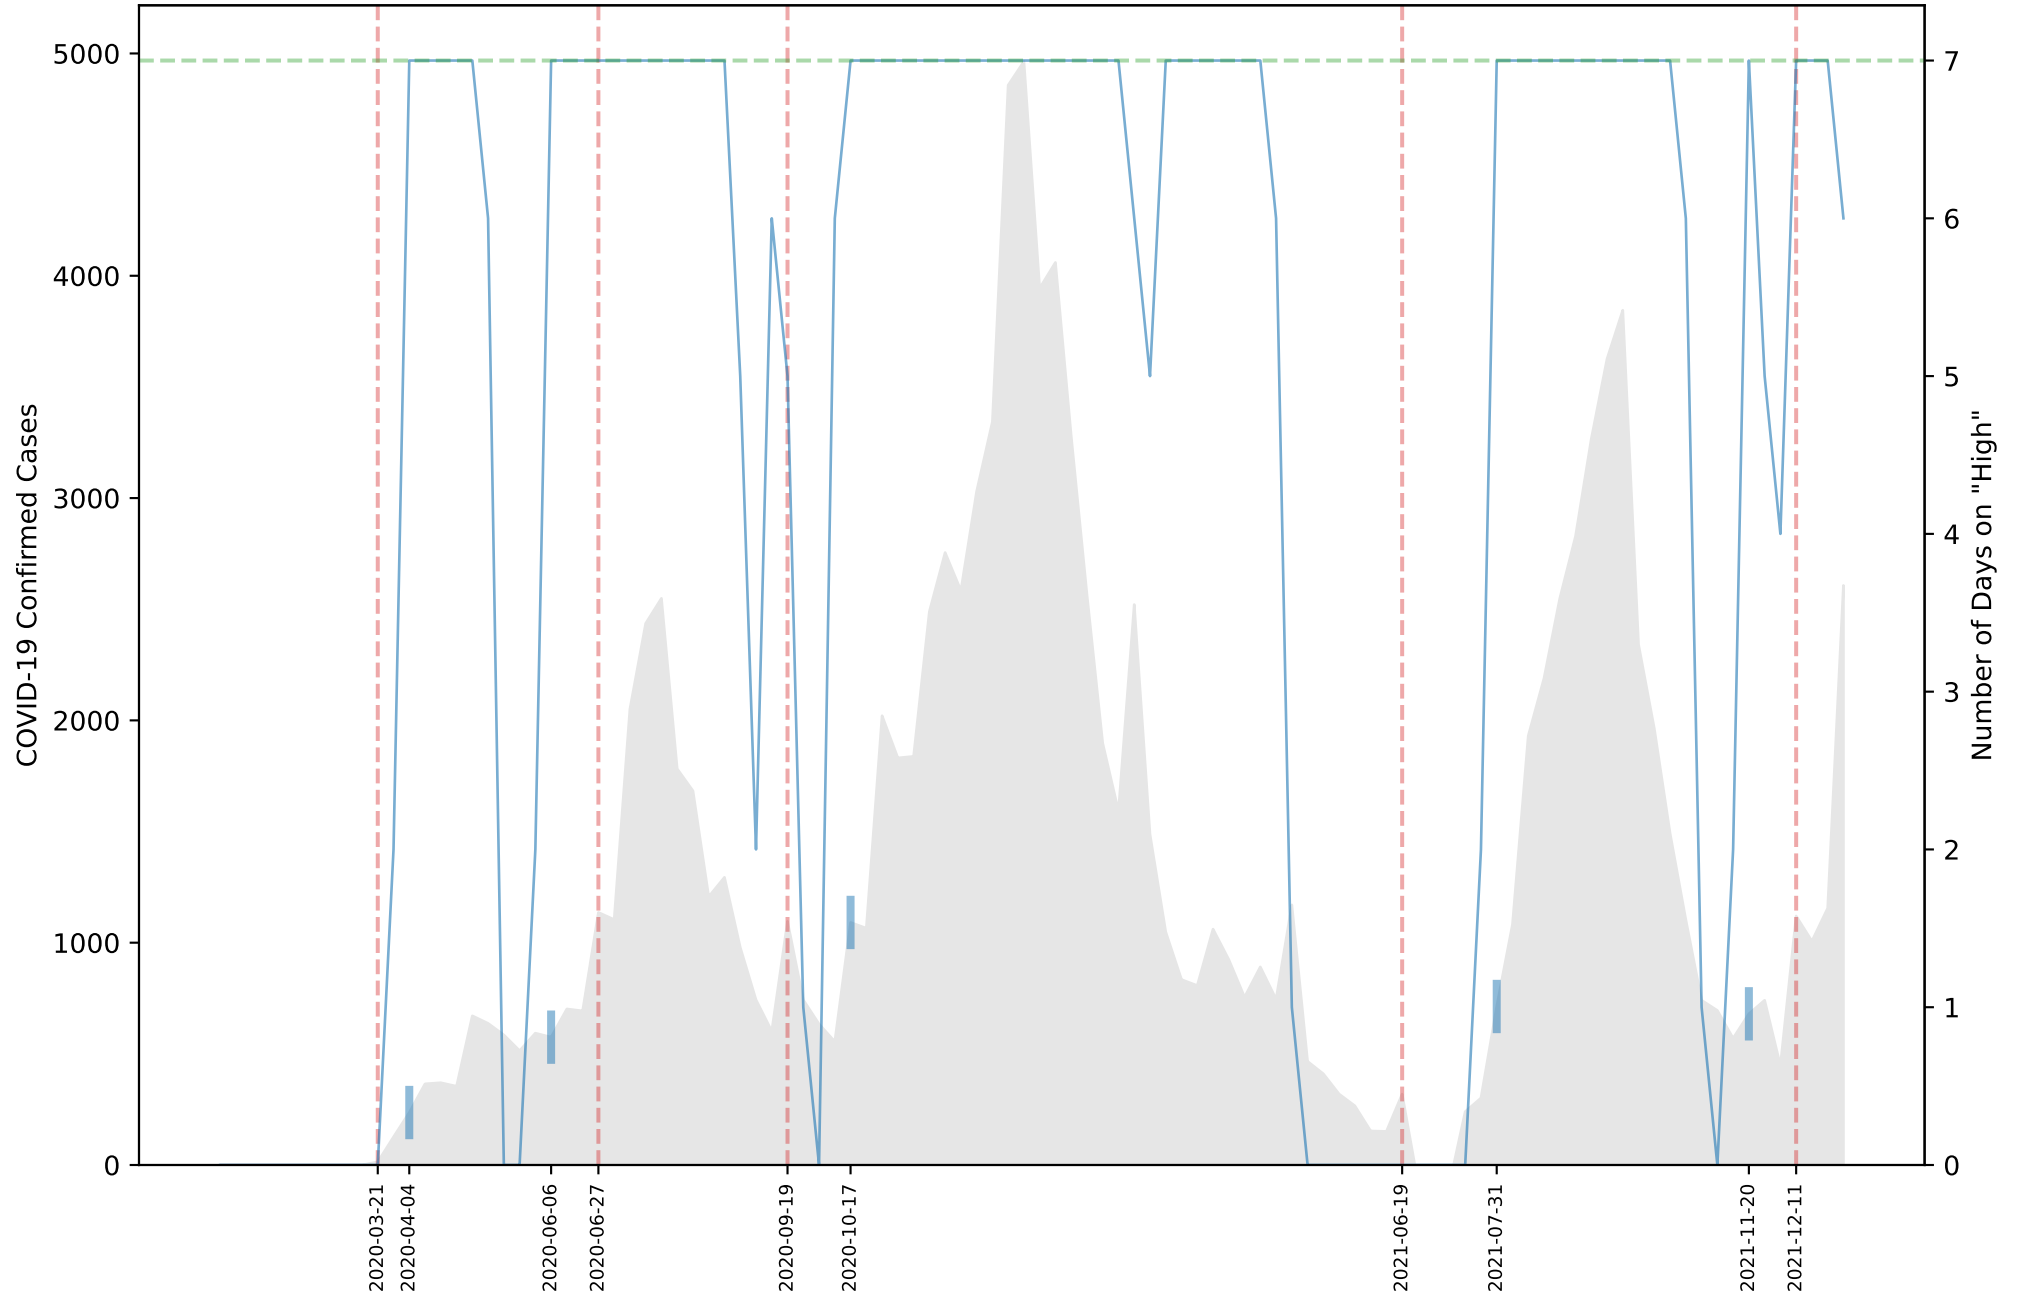

- Number of days on 'High' transmission per week
- - - Threshold to mark the beginning of epidemic event for CDC signal
- █ CDC beginning of events
- - -  $r_o$  (Parag's method)

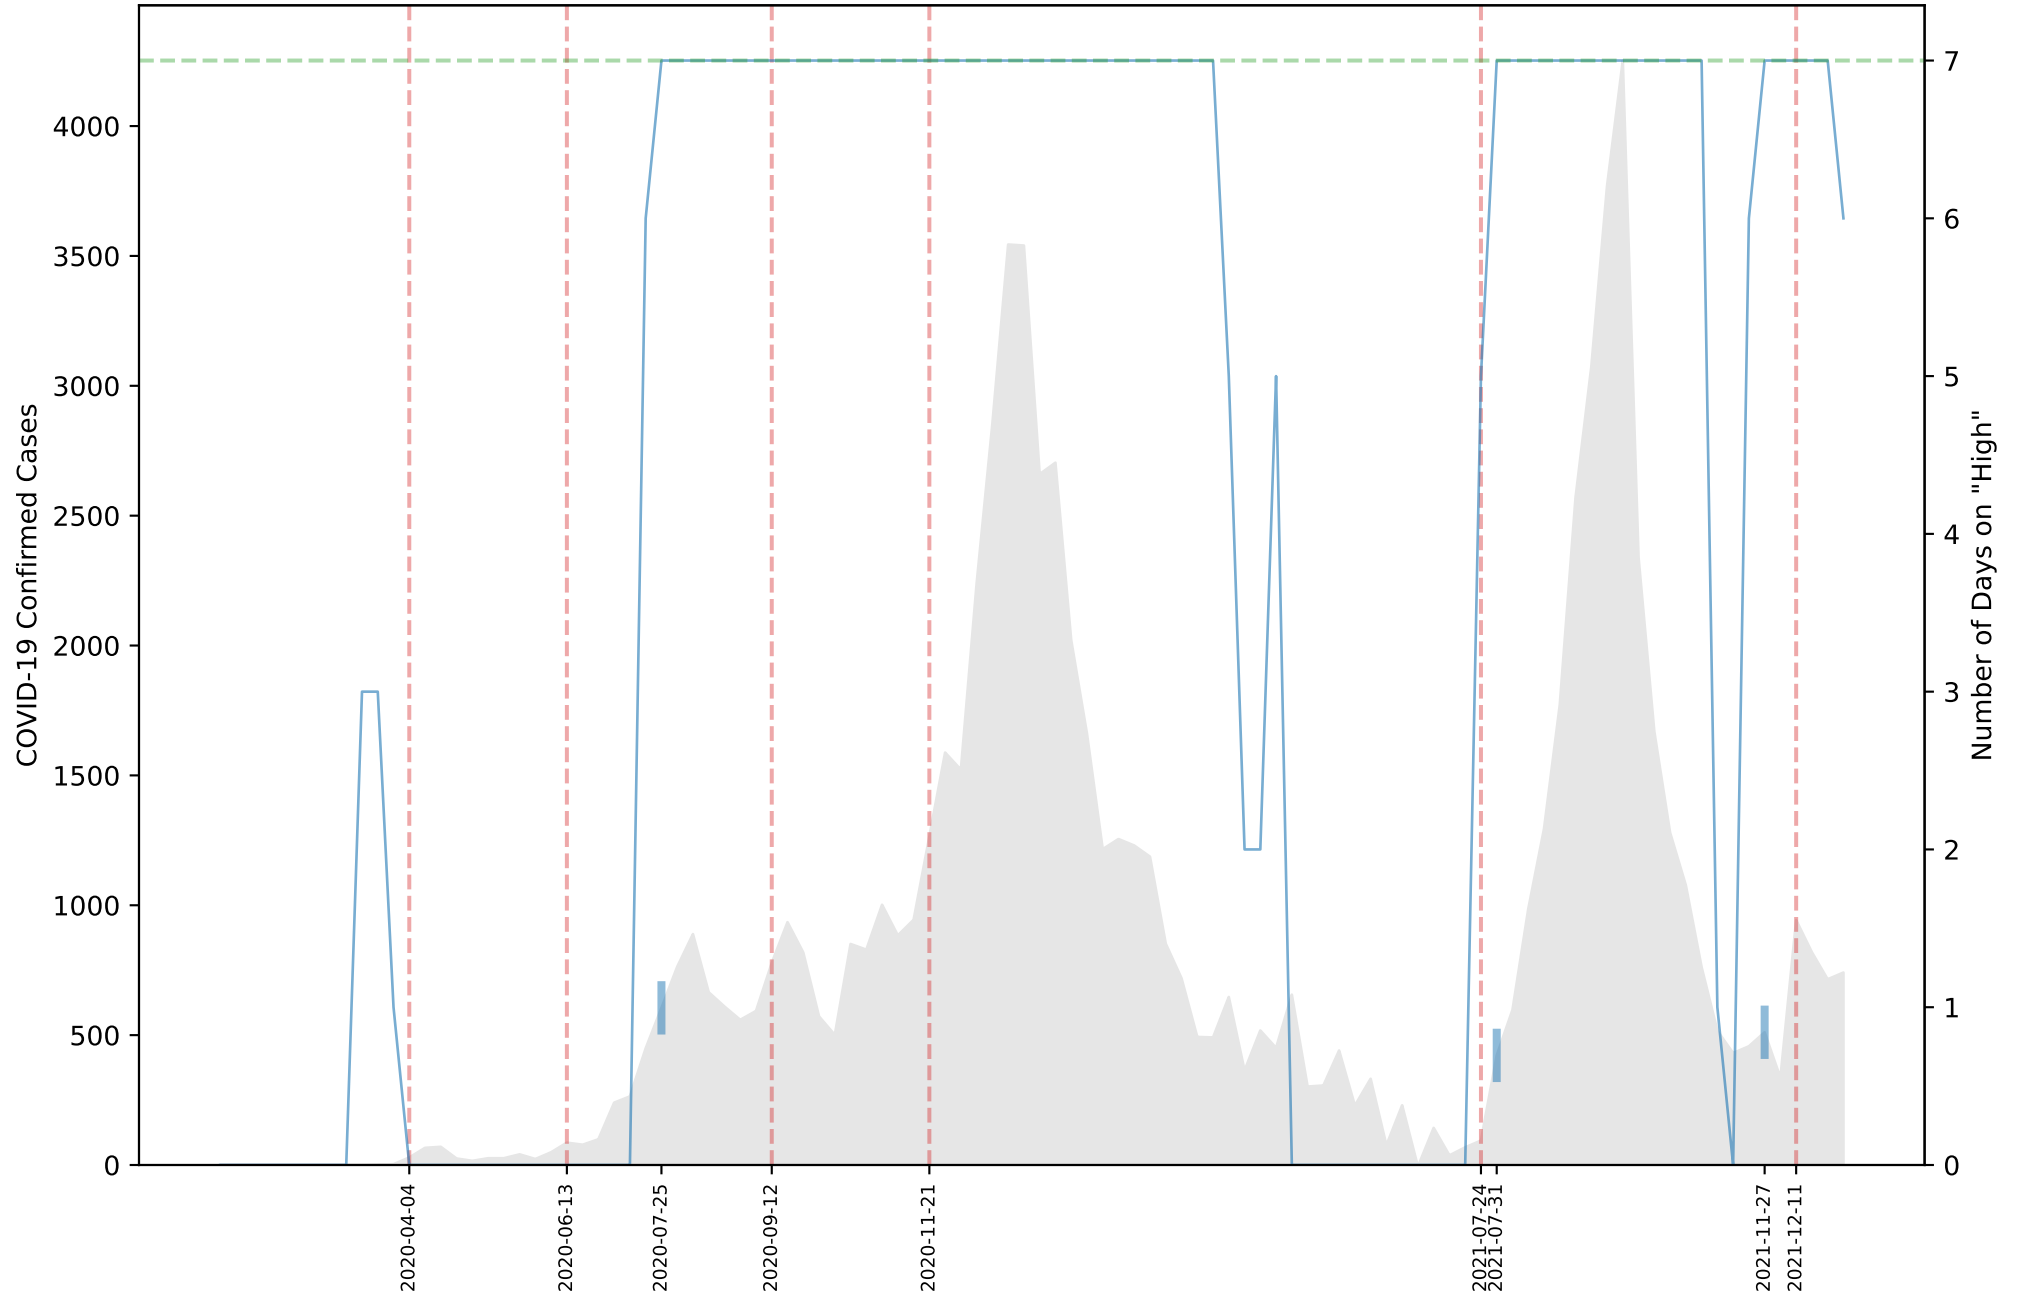

- Number of days on 'High' transmission per week
- - - Threshold to mark the beginning of epidemic event for CDC signal
- █ CDC beginning of events
- - -  $r_o$  (Parag's method)

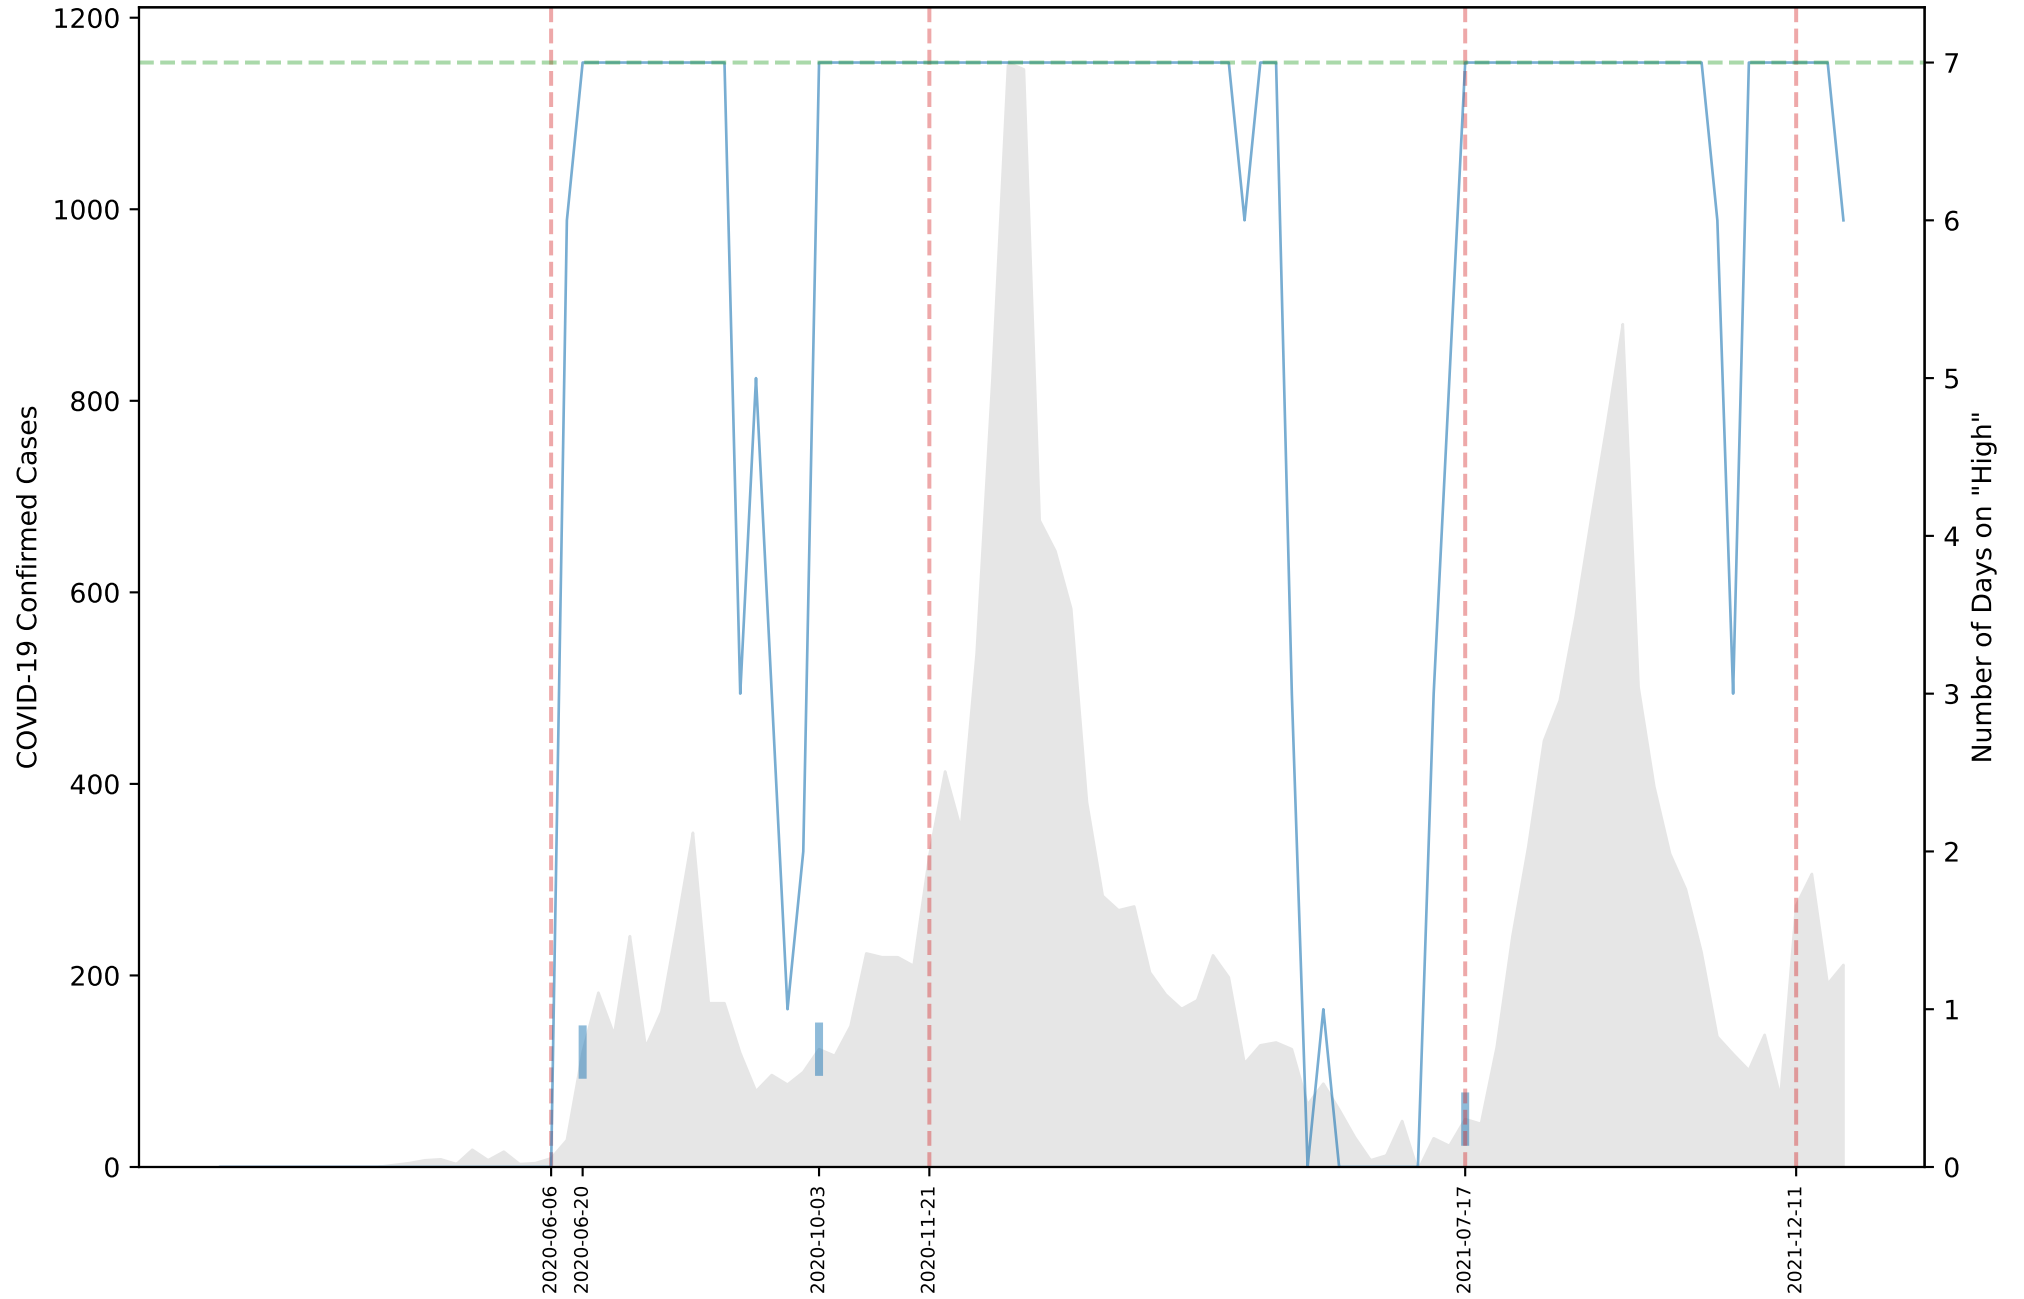

- Number of days on 'High' transmission per week
- - - Threshold to mark the beginning of epidemic event for CDC signal
- █ CDC beginning of events
- - -  $r_o$  (Parag's method)

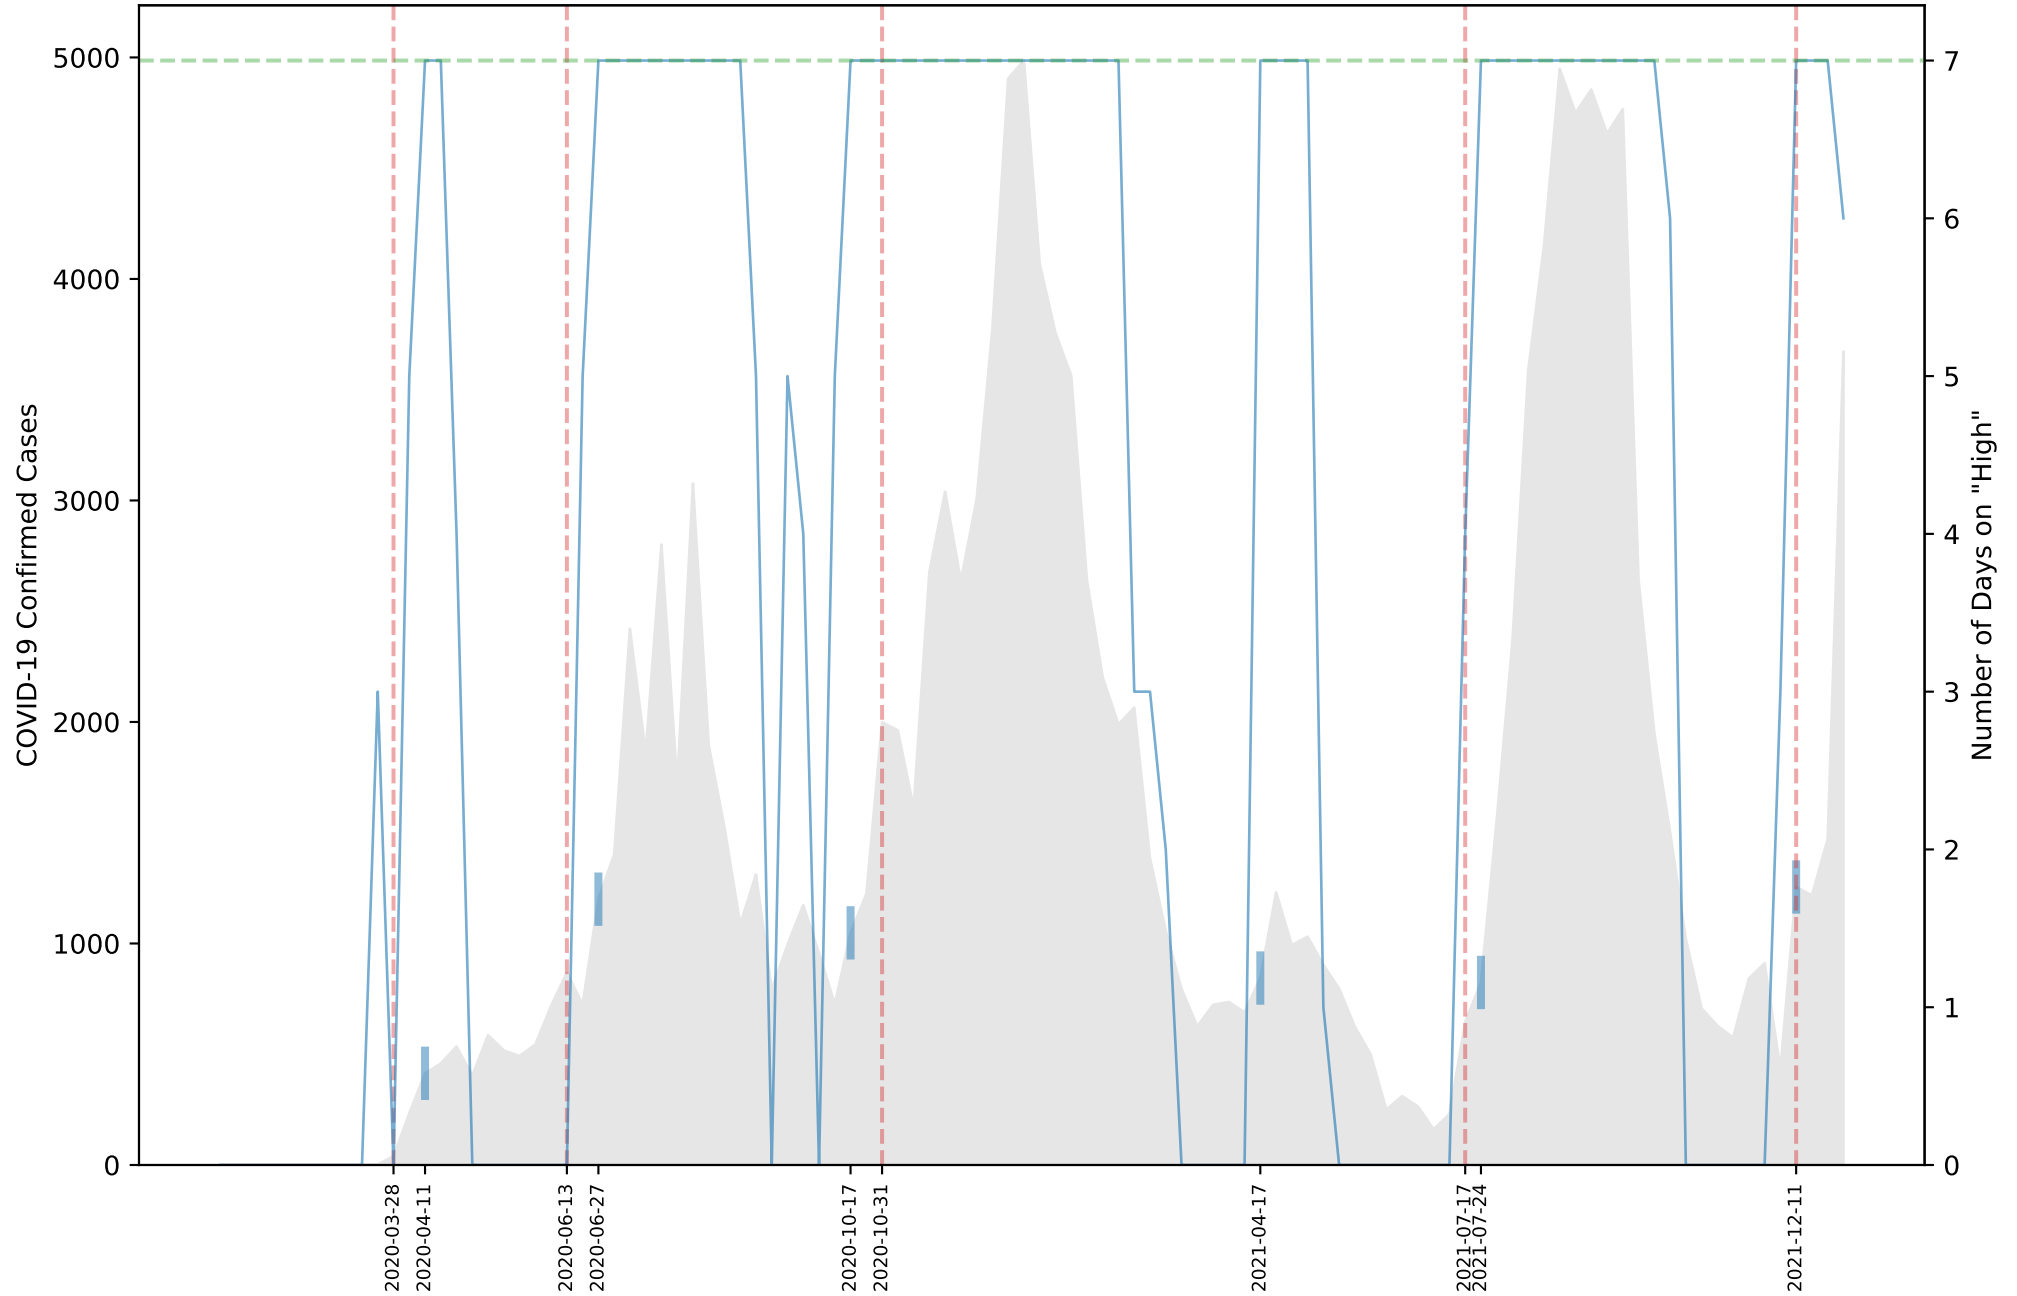

# TX, Bexar

S276

- Number of days on 'High' transmission per week
- - - Threshold to mark the beginning of epidemic event for CDC signal
- █ CDC beginning of events
- - -  $r_o$  (Parag's method)

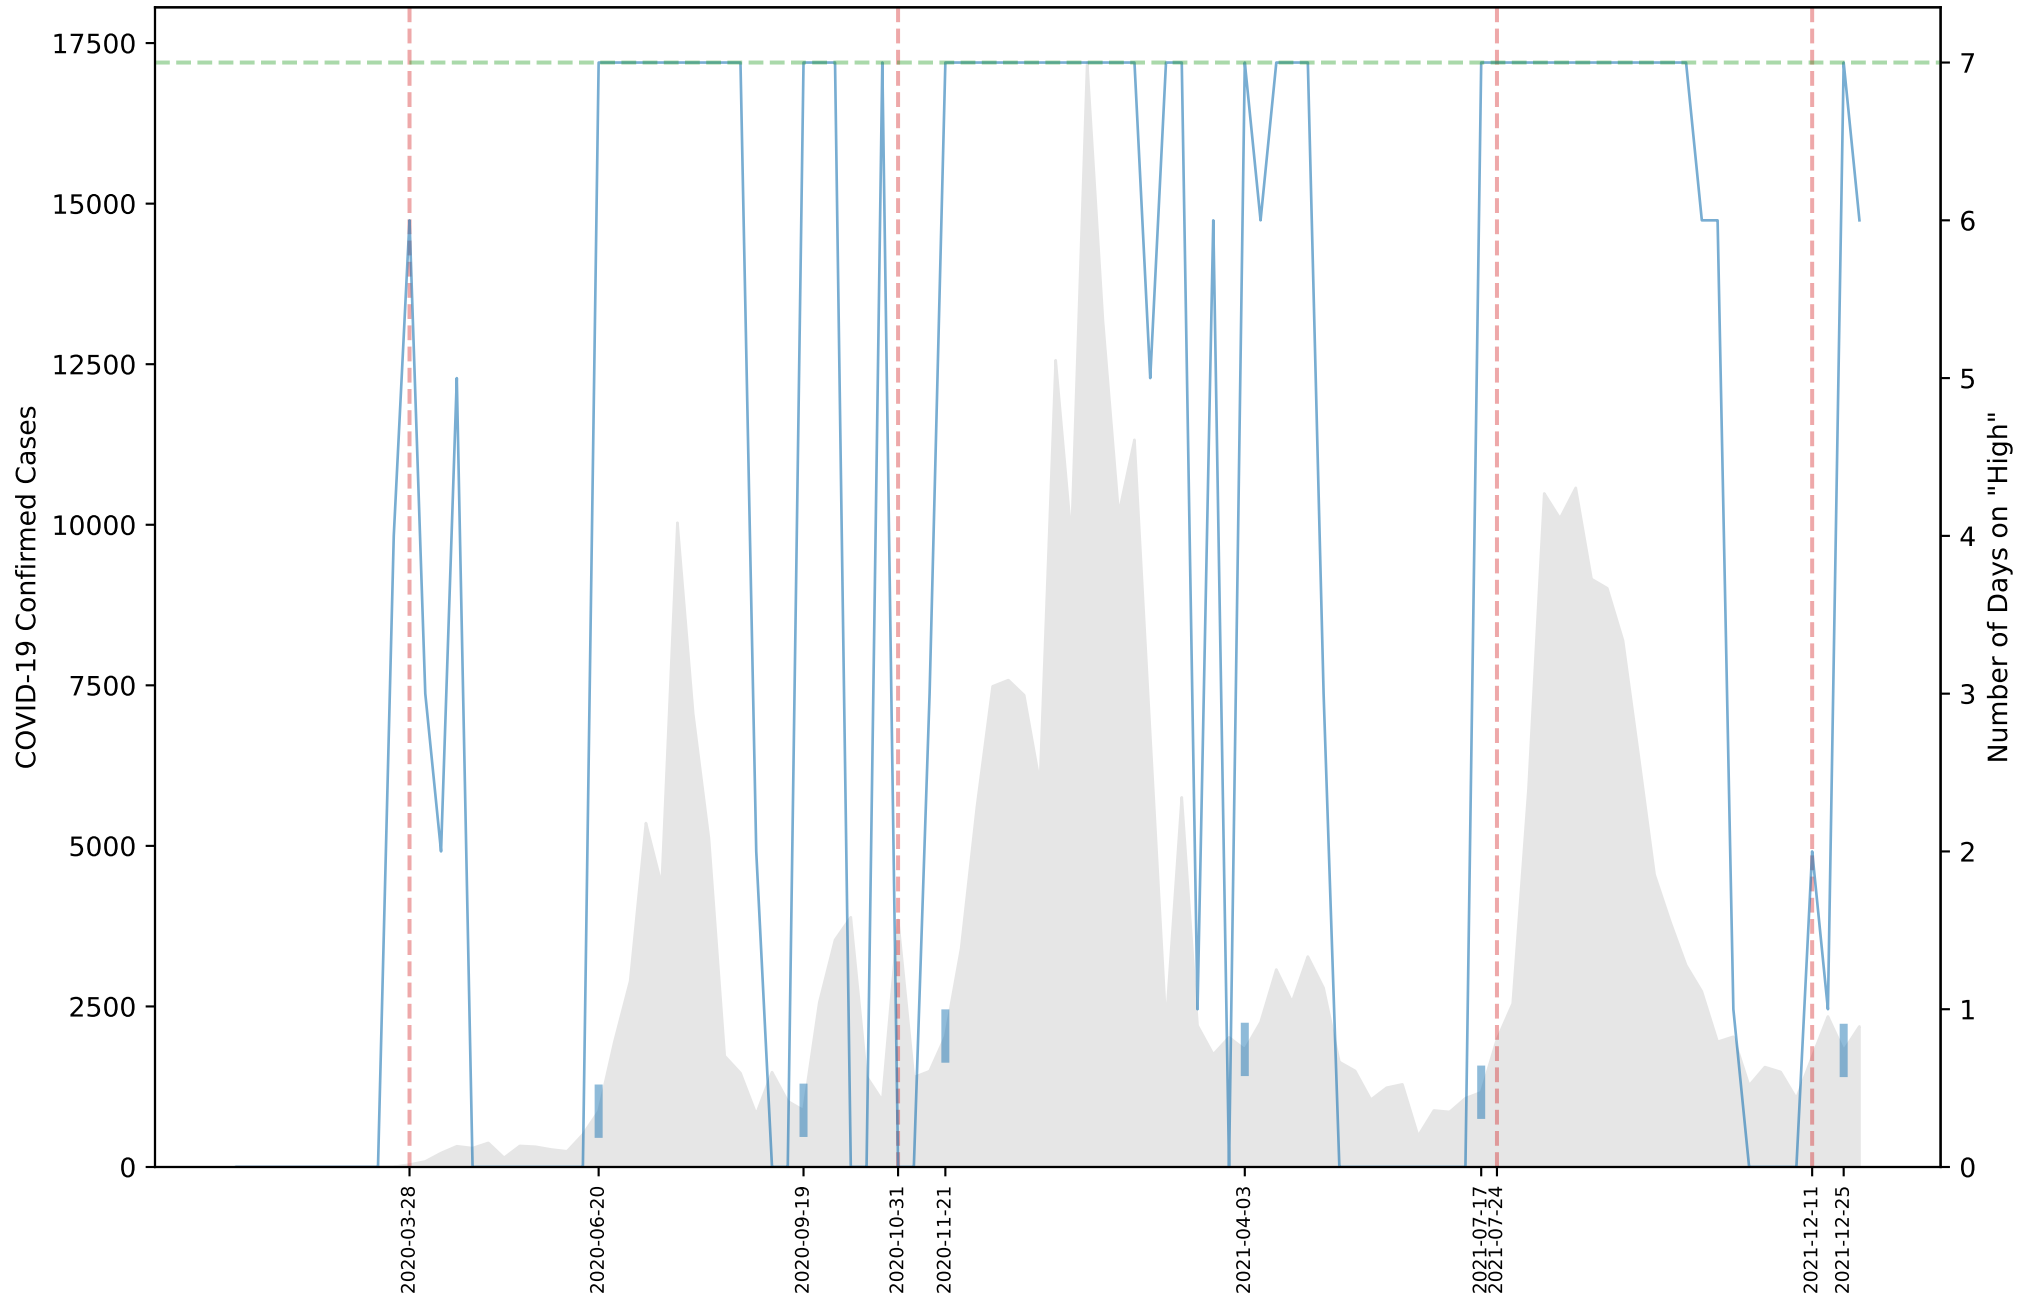

# TX, Collin

S277

- Number of days on 'High' transmission per week
- - - Threshold to mark the beginning of epidemic event for CDC signal
- █ CDC beginning of events
- - -  $r_o$  (Parag's method)

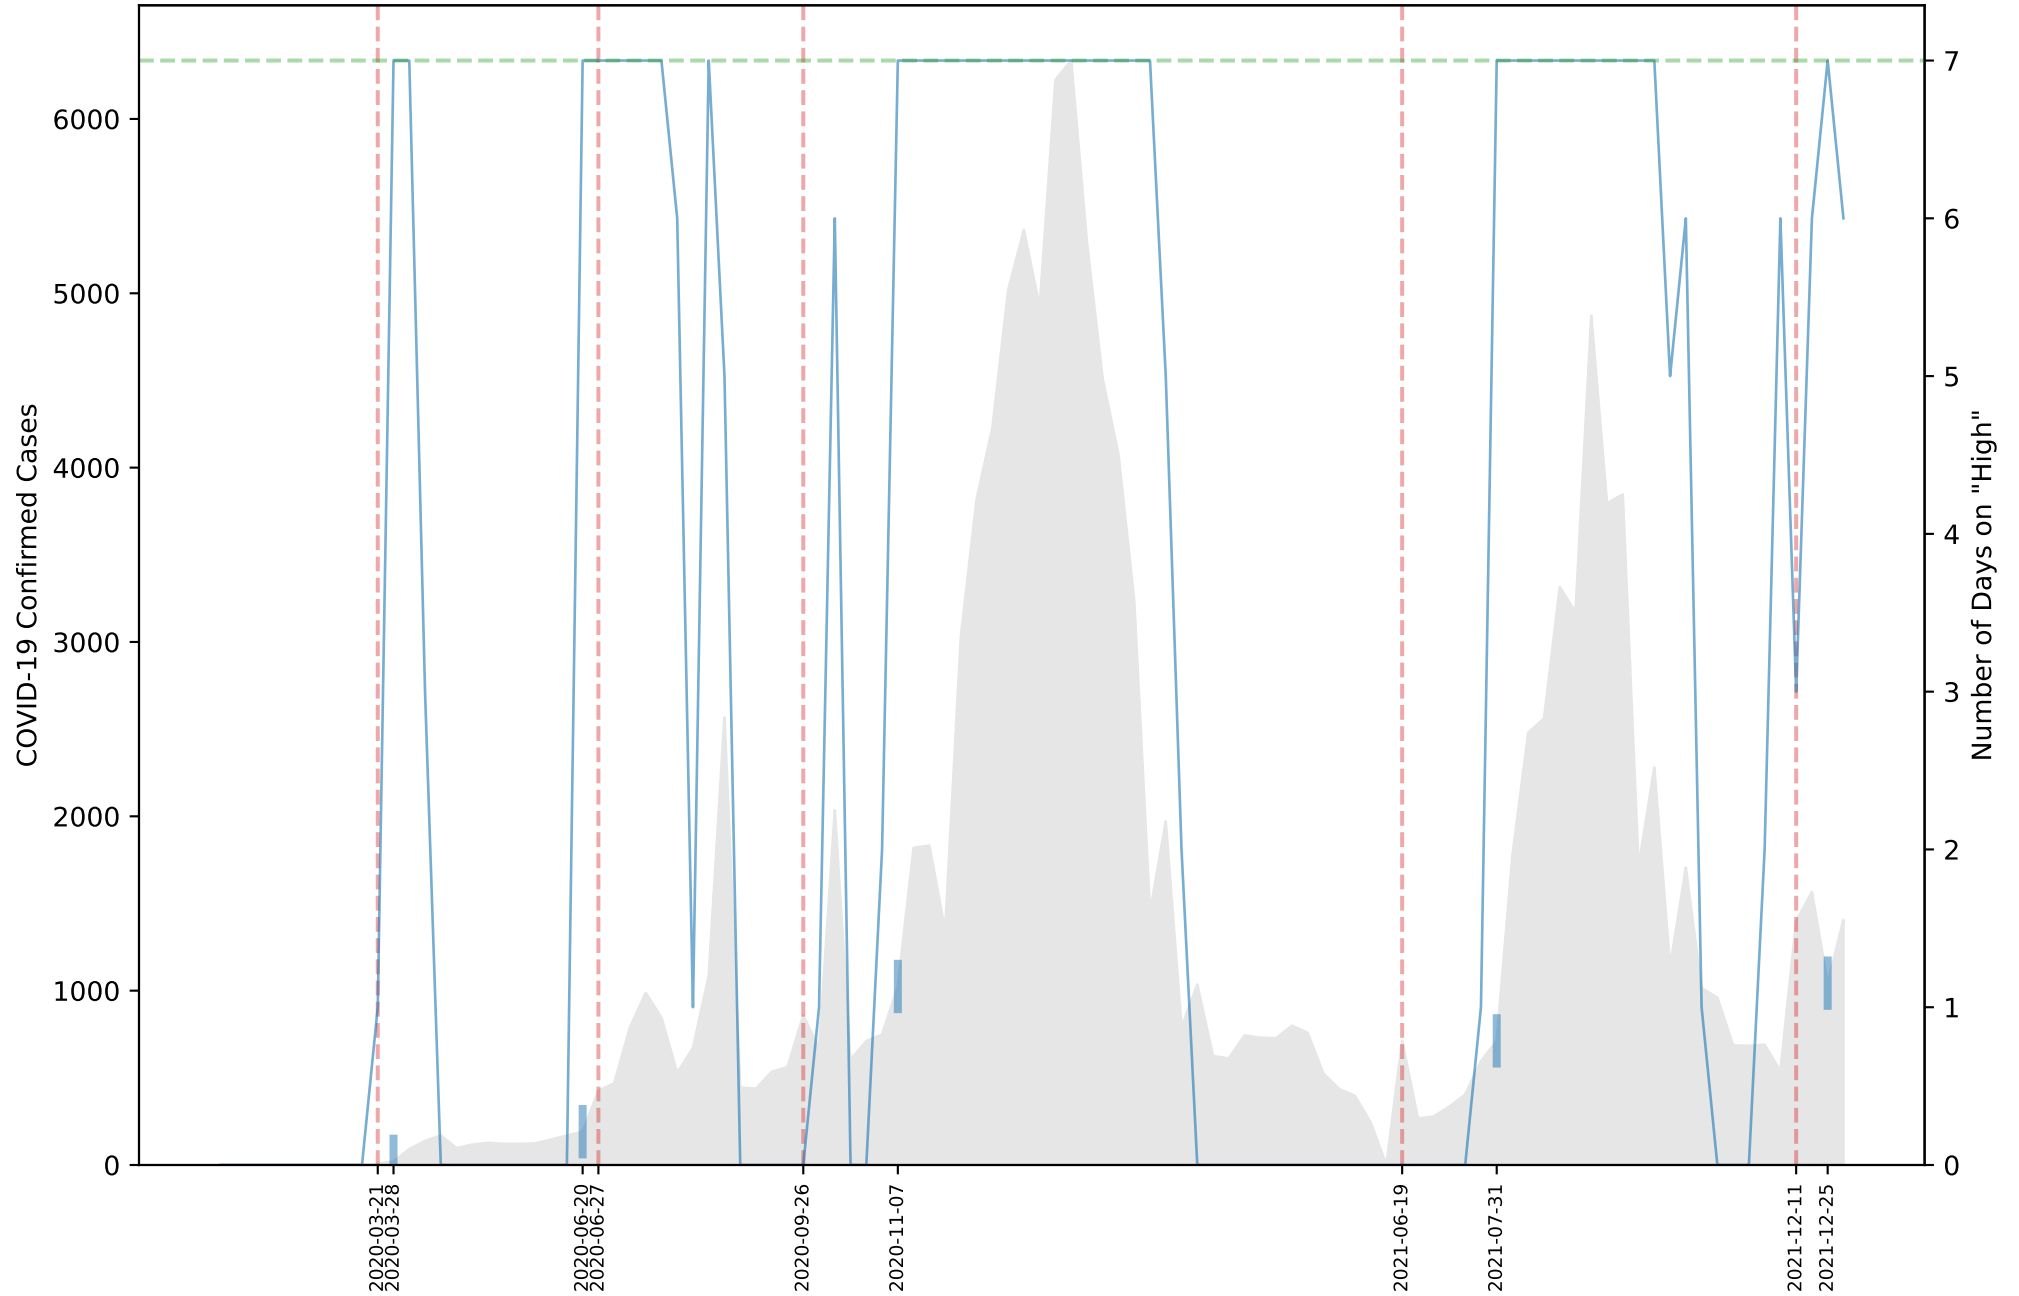

- Number of days on 'High' transmission per week
- - - Threshold to mark the beginning of epidemic event for CDC signal
- █ CDC beginning of events
- - -  $r_o$  (Parag's method)

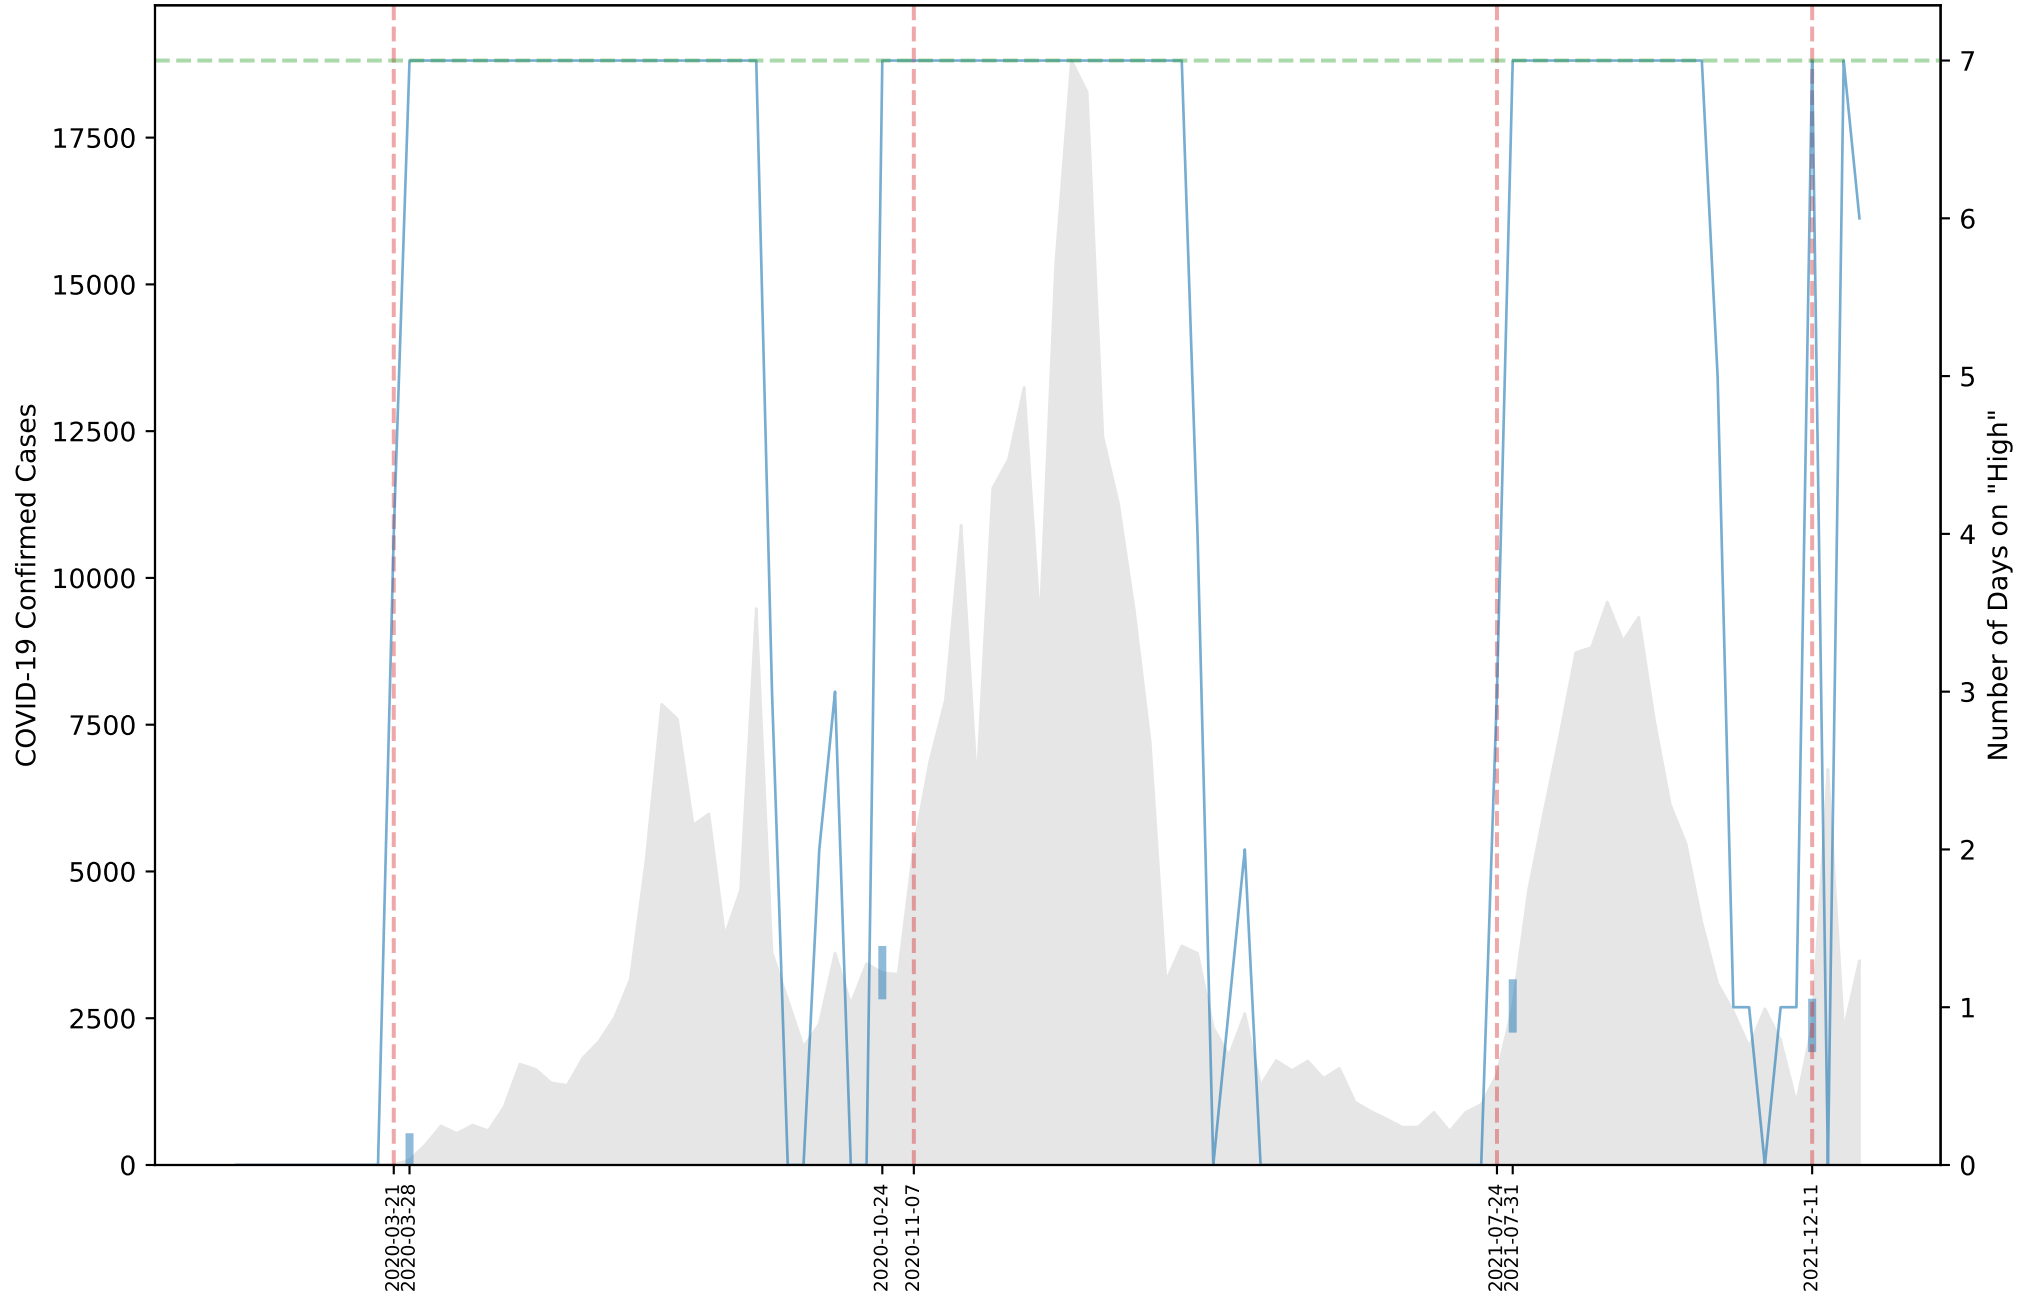



- Number of days on 'High' transmission per week
- - - Threshold to mark the beginning of epidemic event for CDC signal
- █ CDC beginning of events
- - -  $r_o$  (Parag's method)

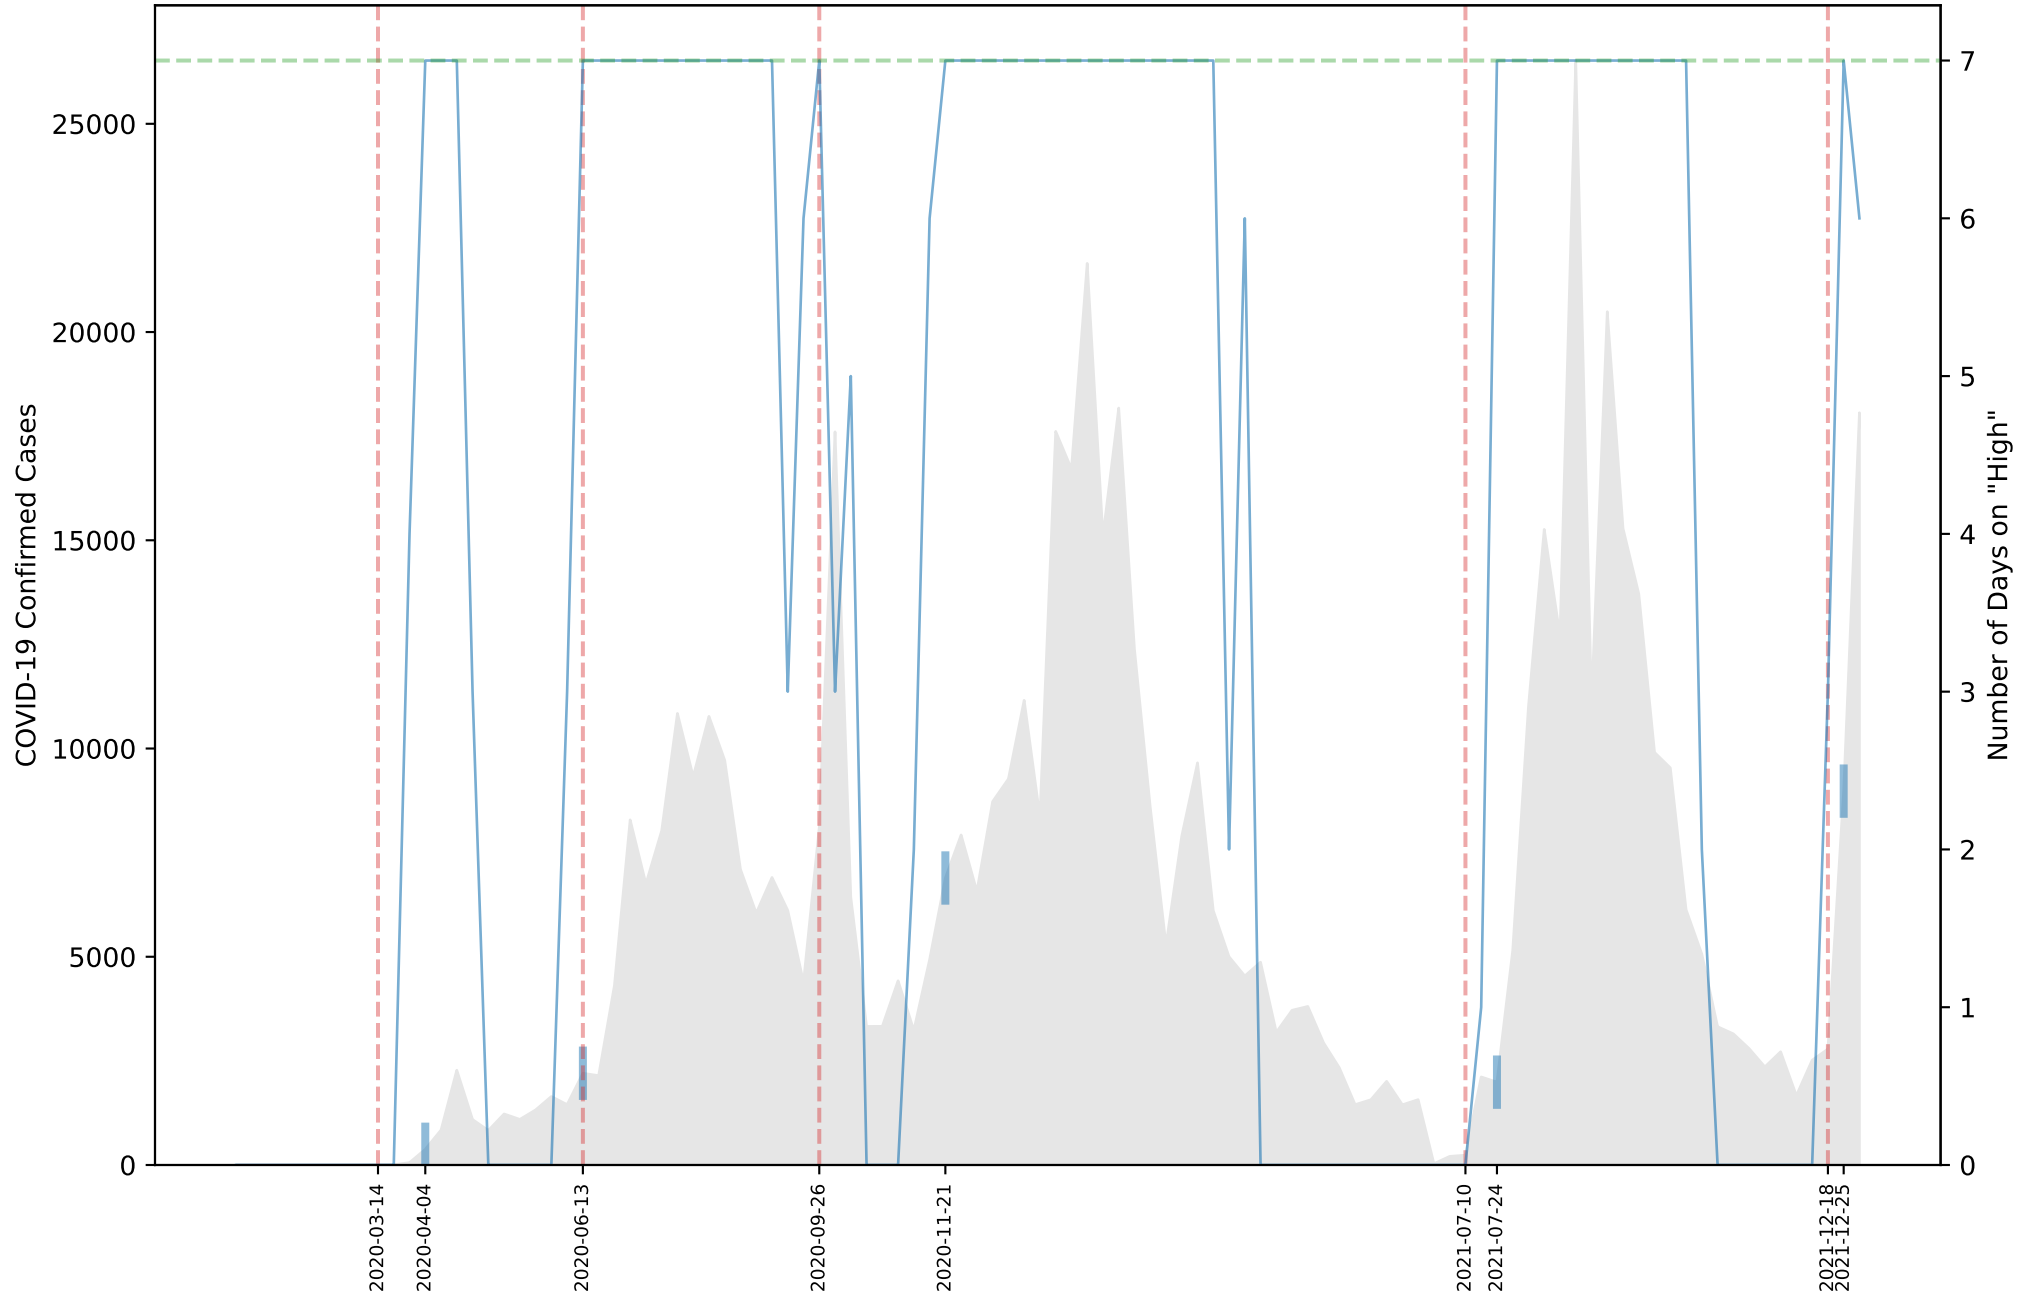

# TX, Tarrant

S280

- Number of days on 'High' transmission per week
- - - Threshold to mark the beginning of epidemic event for CDC signal
- █ CDC beginning of events
- - -  $r_o$  (Parag's method)

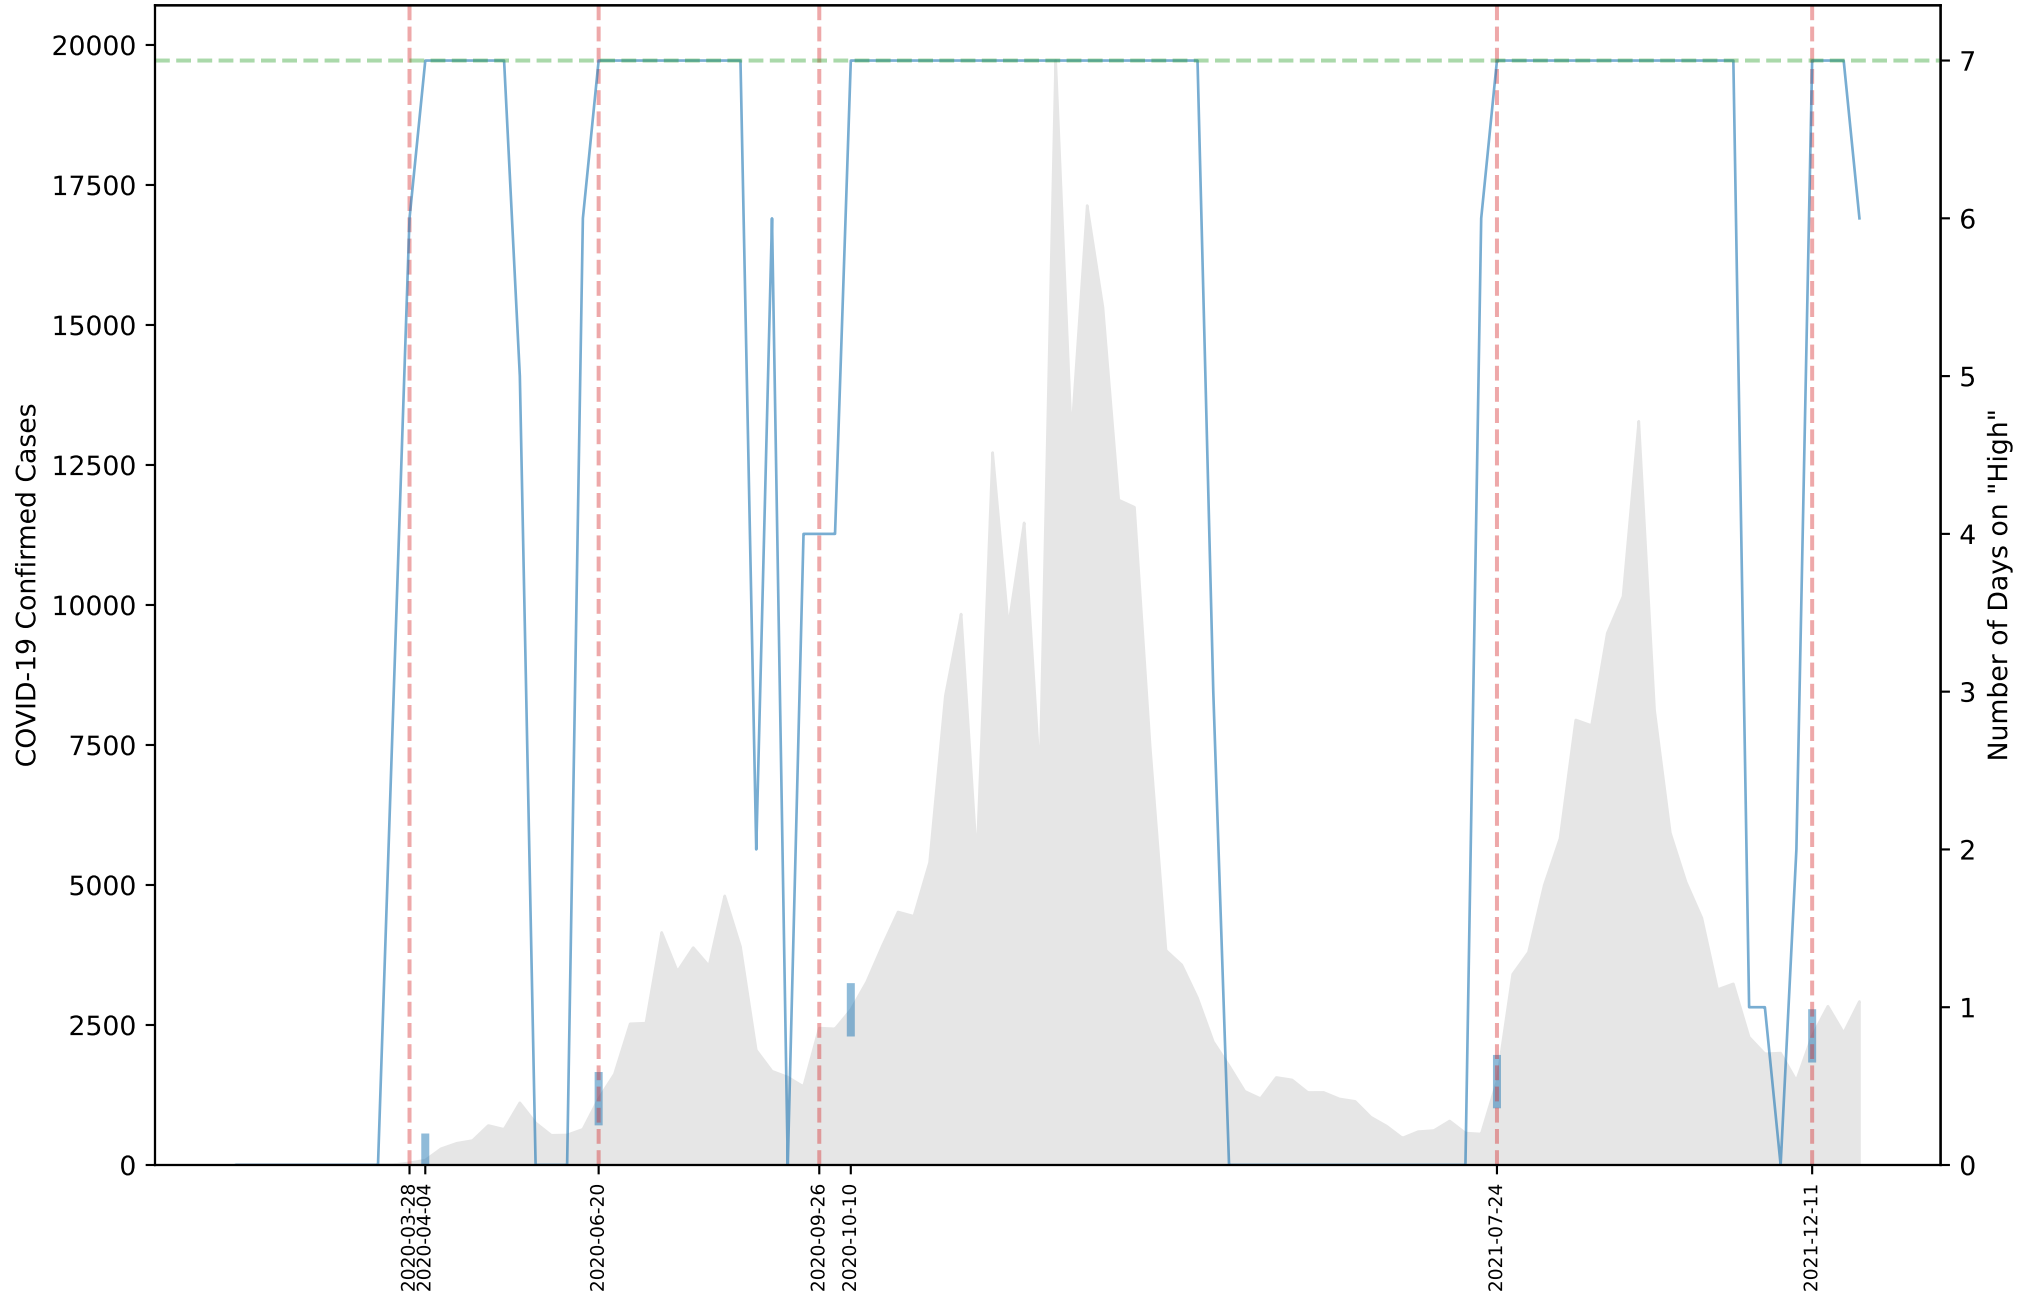

- Number of days on 'High' transmission per week
- - - Threshold to mark the beginning of epidemic event for CDC signal
- █ CDC beginning of events
- - -  $r_o$  (Parag's method)

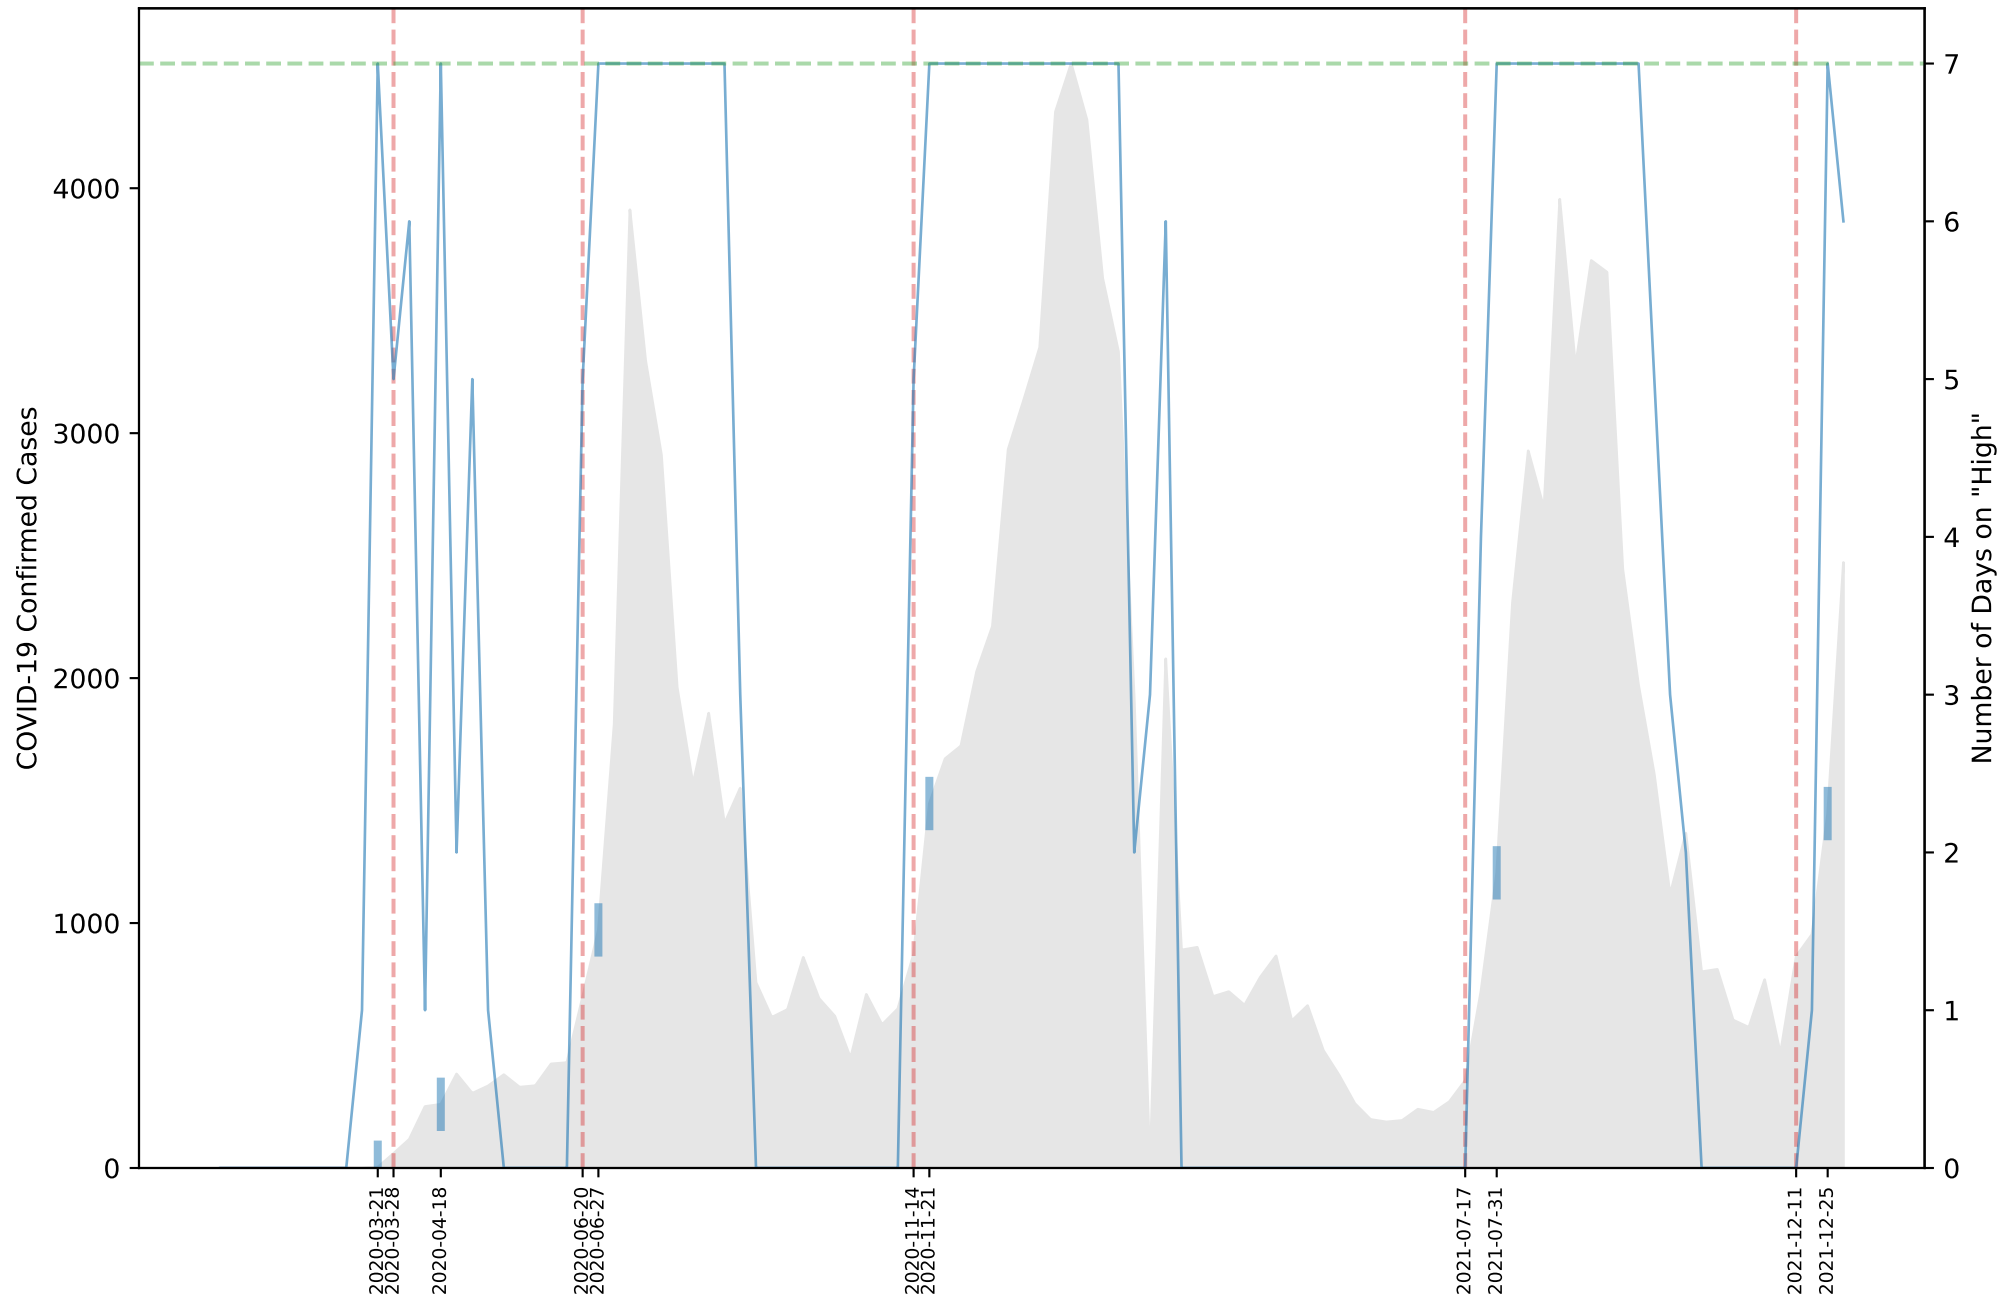

- Number of days on 'High' transmission per week
- - - Threshold to mark the beginning of epidemic event for CDC signal
- █ CDC beginning of events
- - -  $r_0$  (Parag's method)

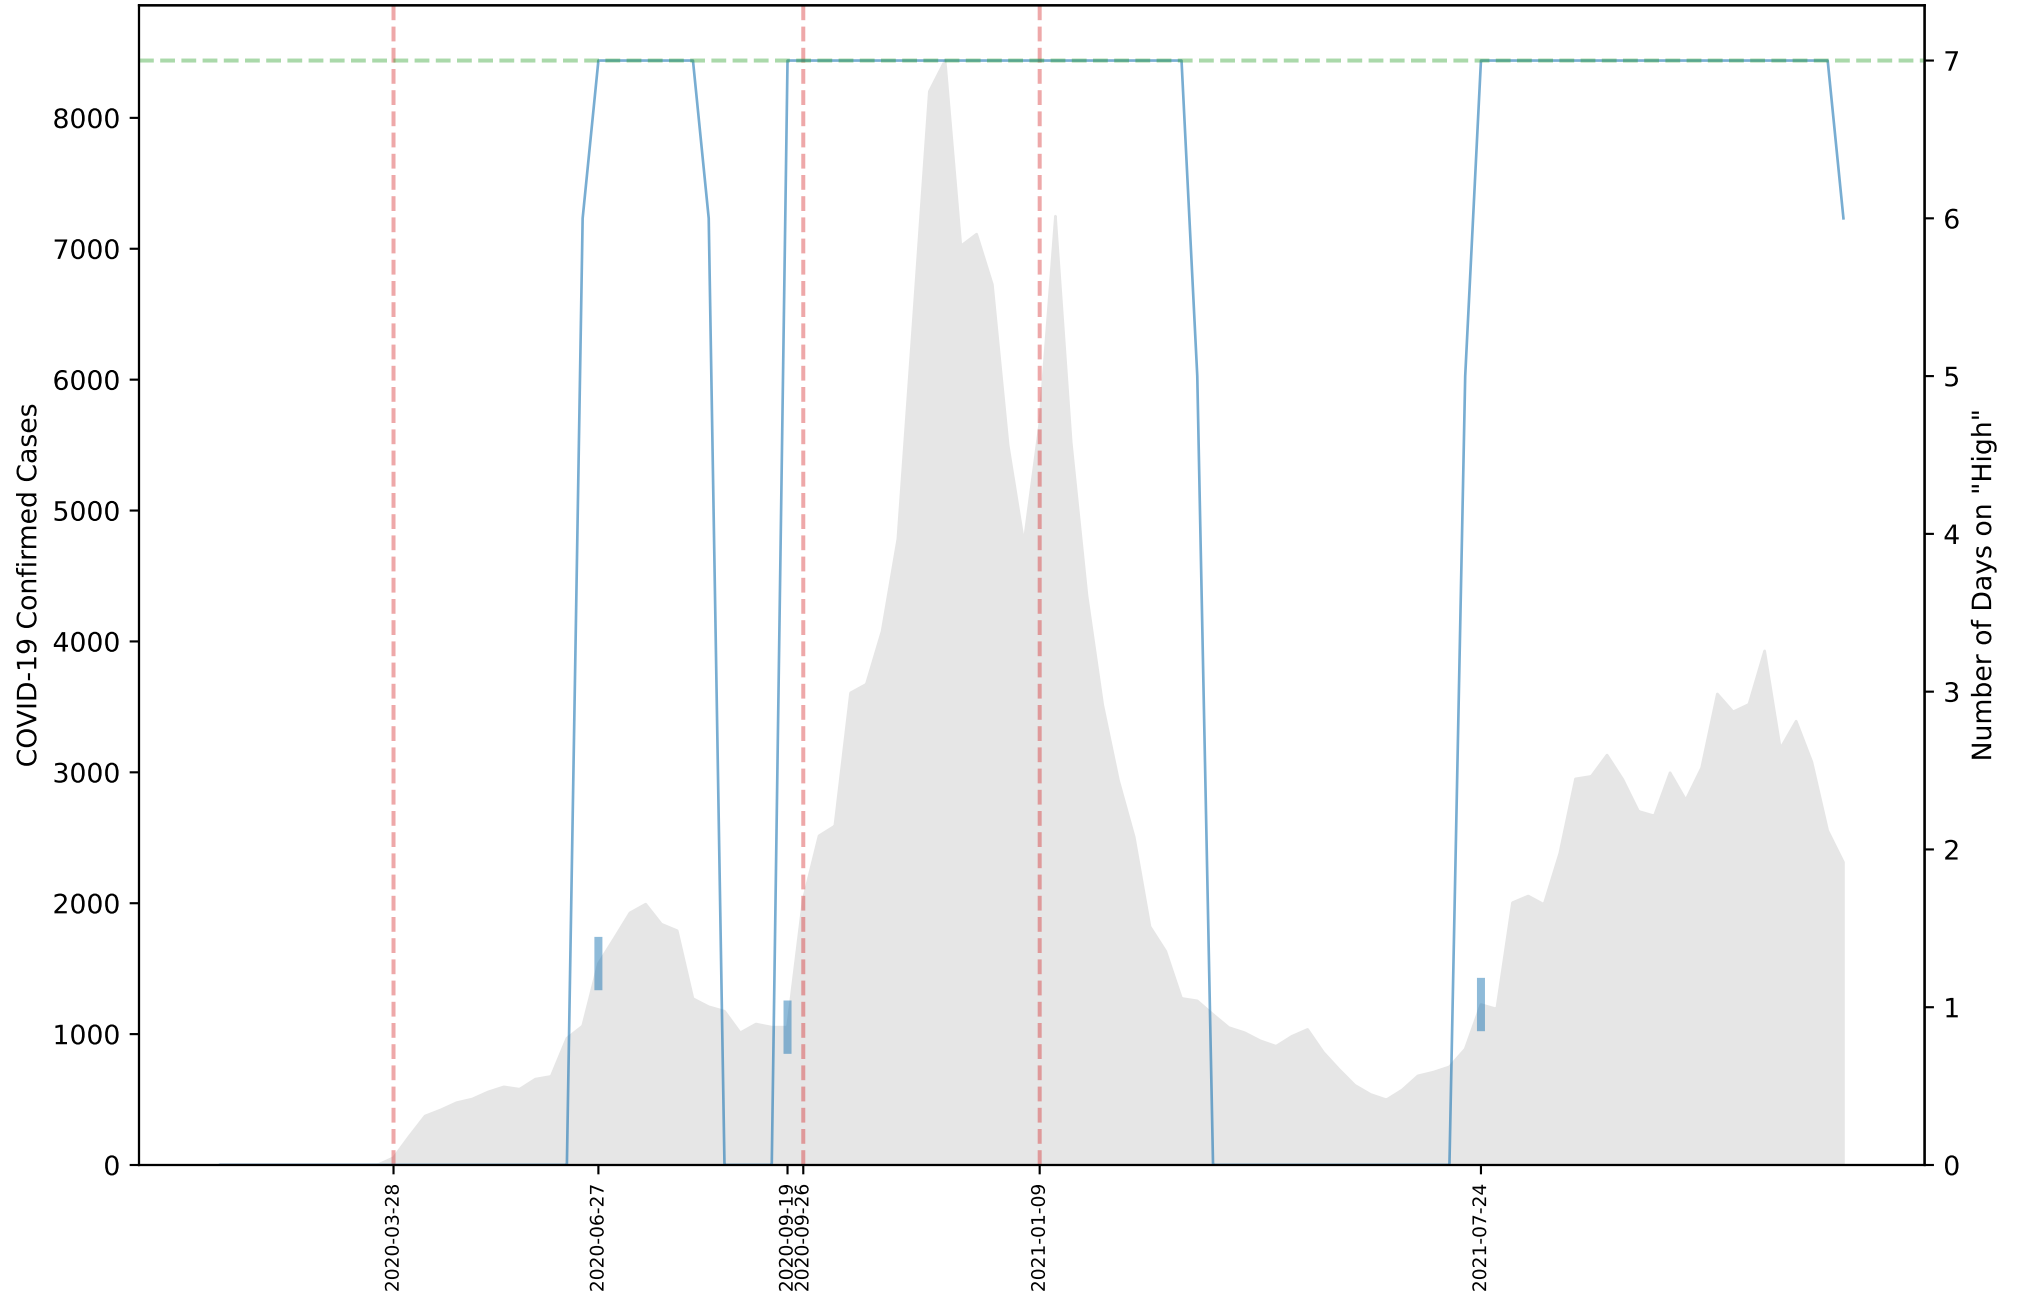

- Number of days on 'High' transmission per week
- - - Threshold to mark the beginning of epidemic event for CDC signal
- █ CDC beginning of events
- - -  $r_o$  (Parag's method)

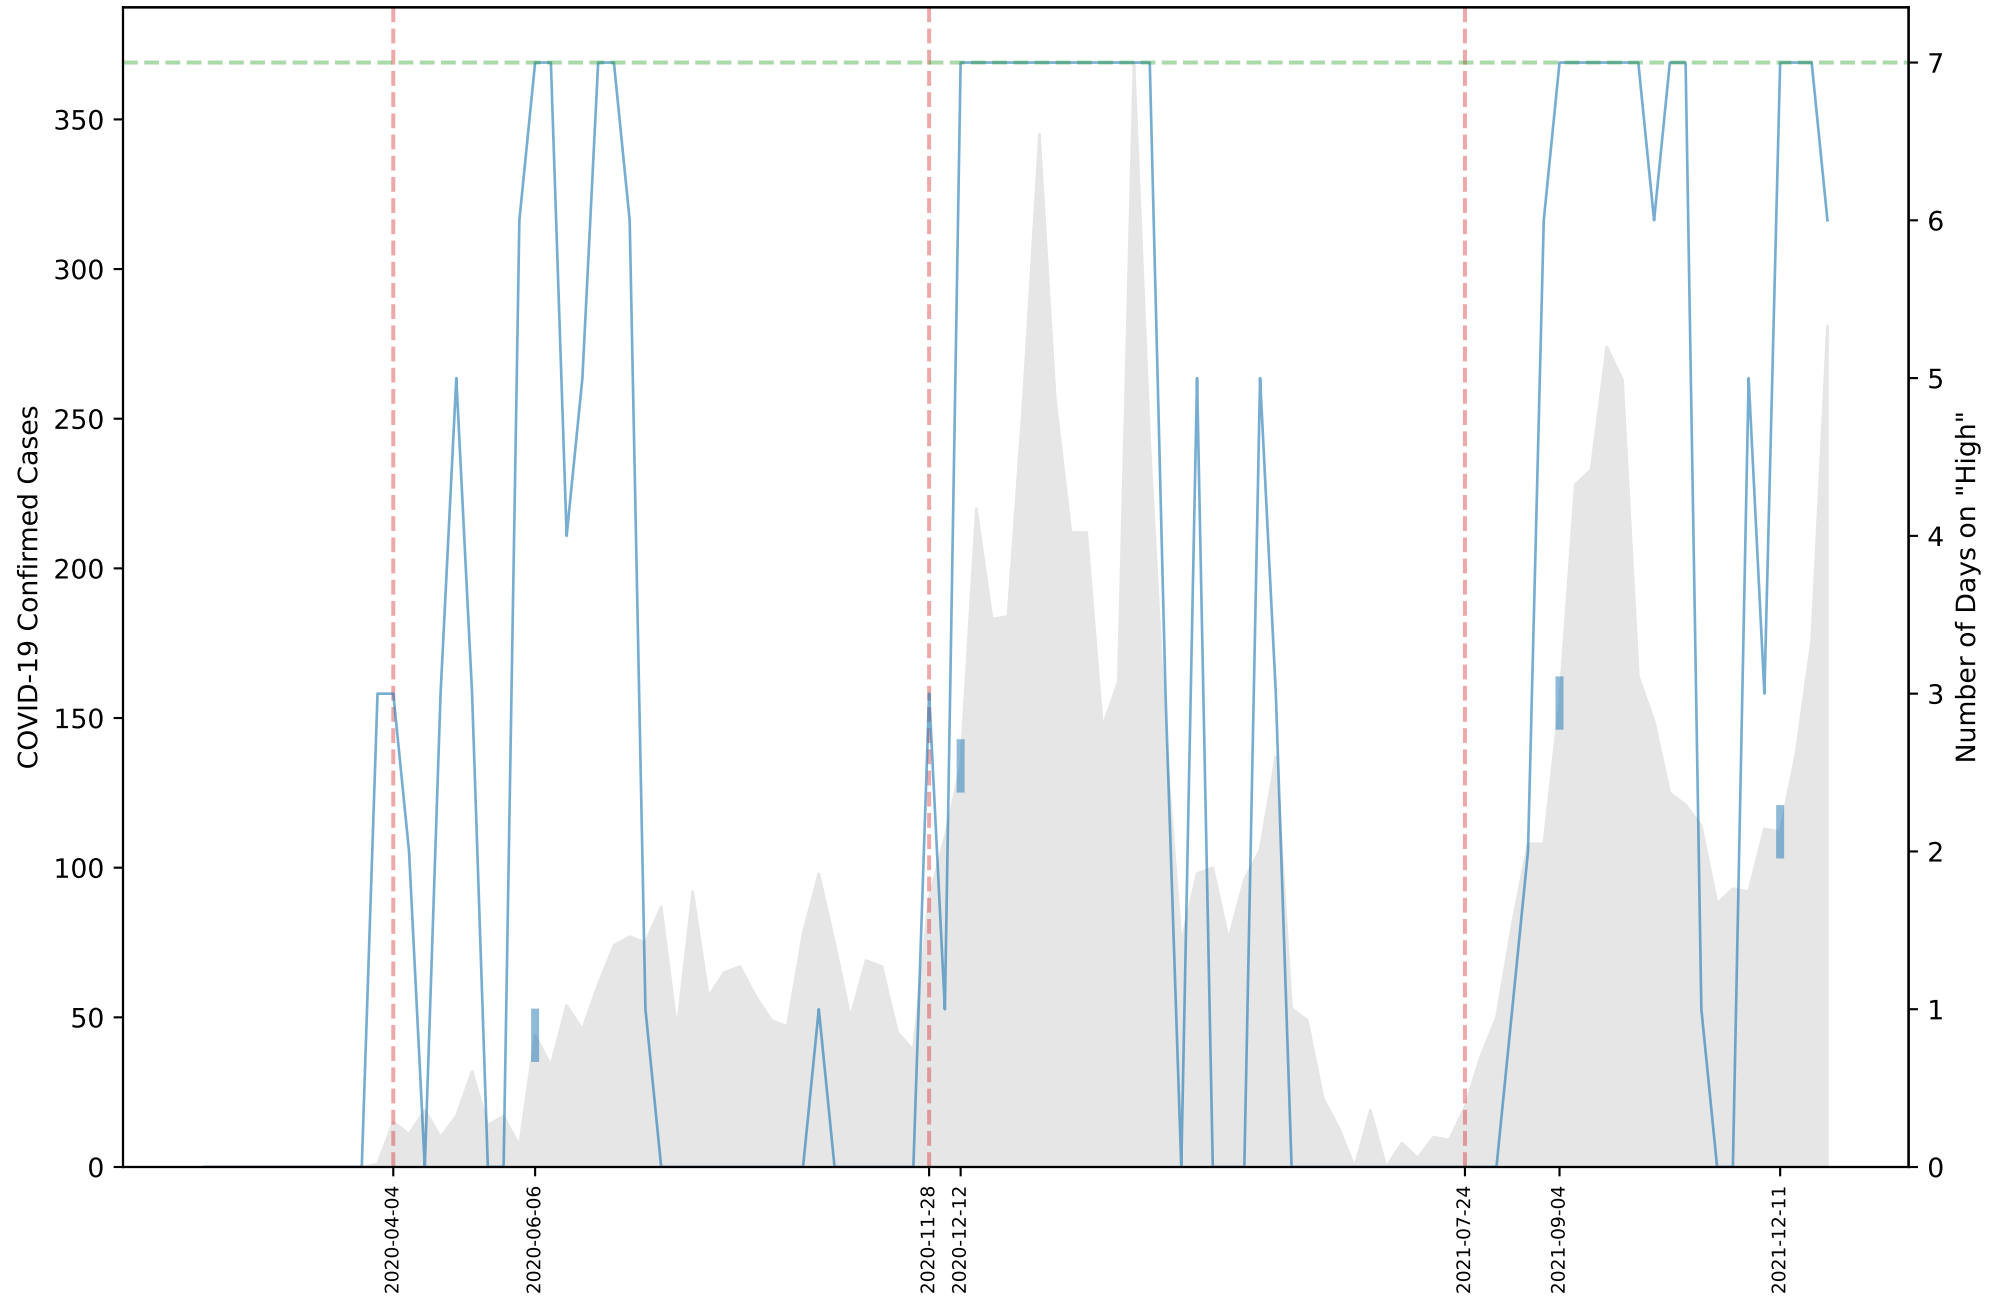

- Number of days on 'High' transmission per week
- - - Threshold to mark the beginning of epidemic event for CDC signal
- █ CDC beginning of events
- - -  $r_o$  (Parag's method)

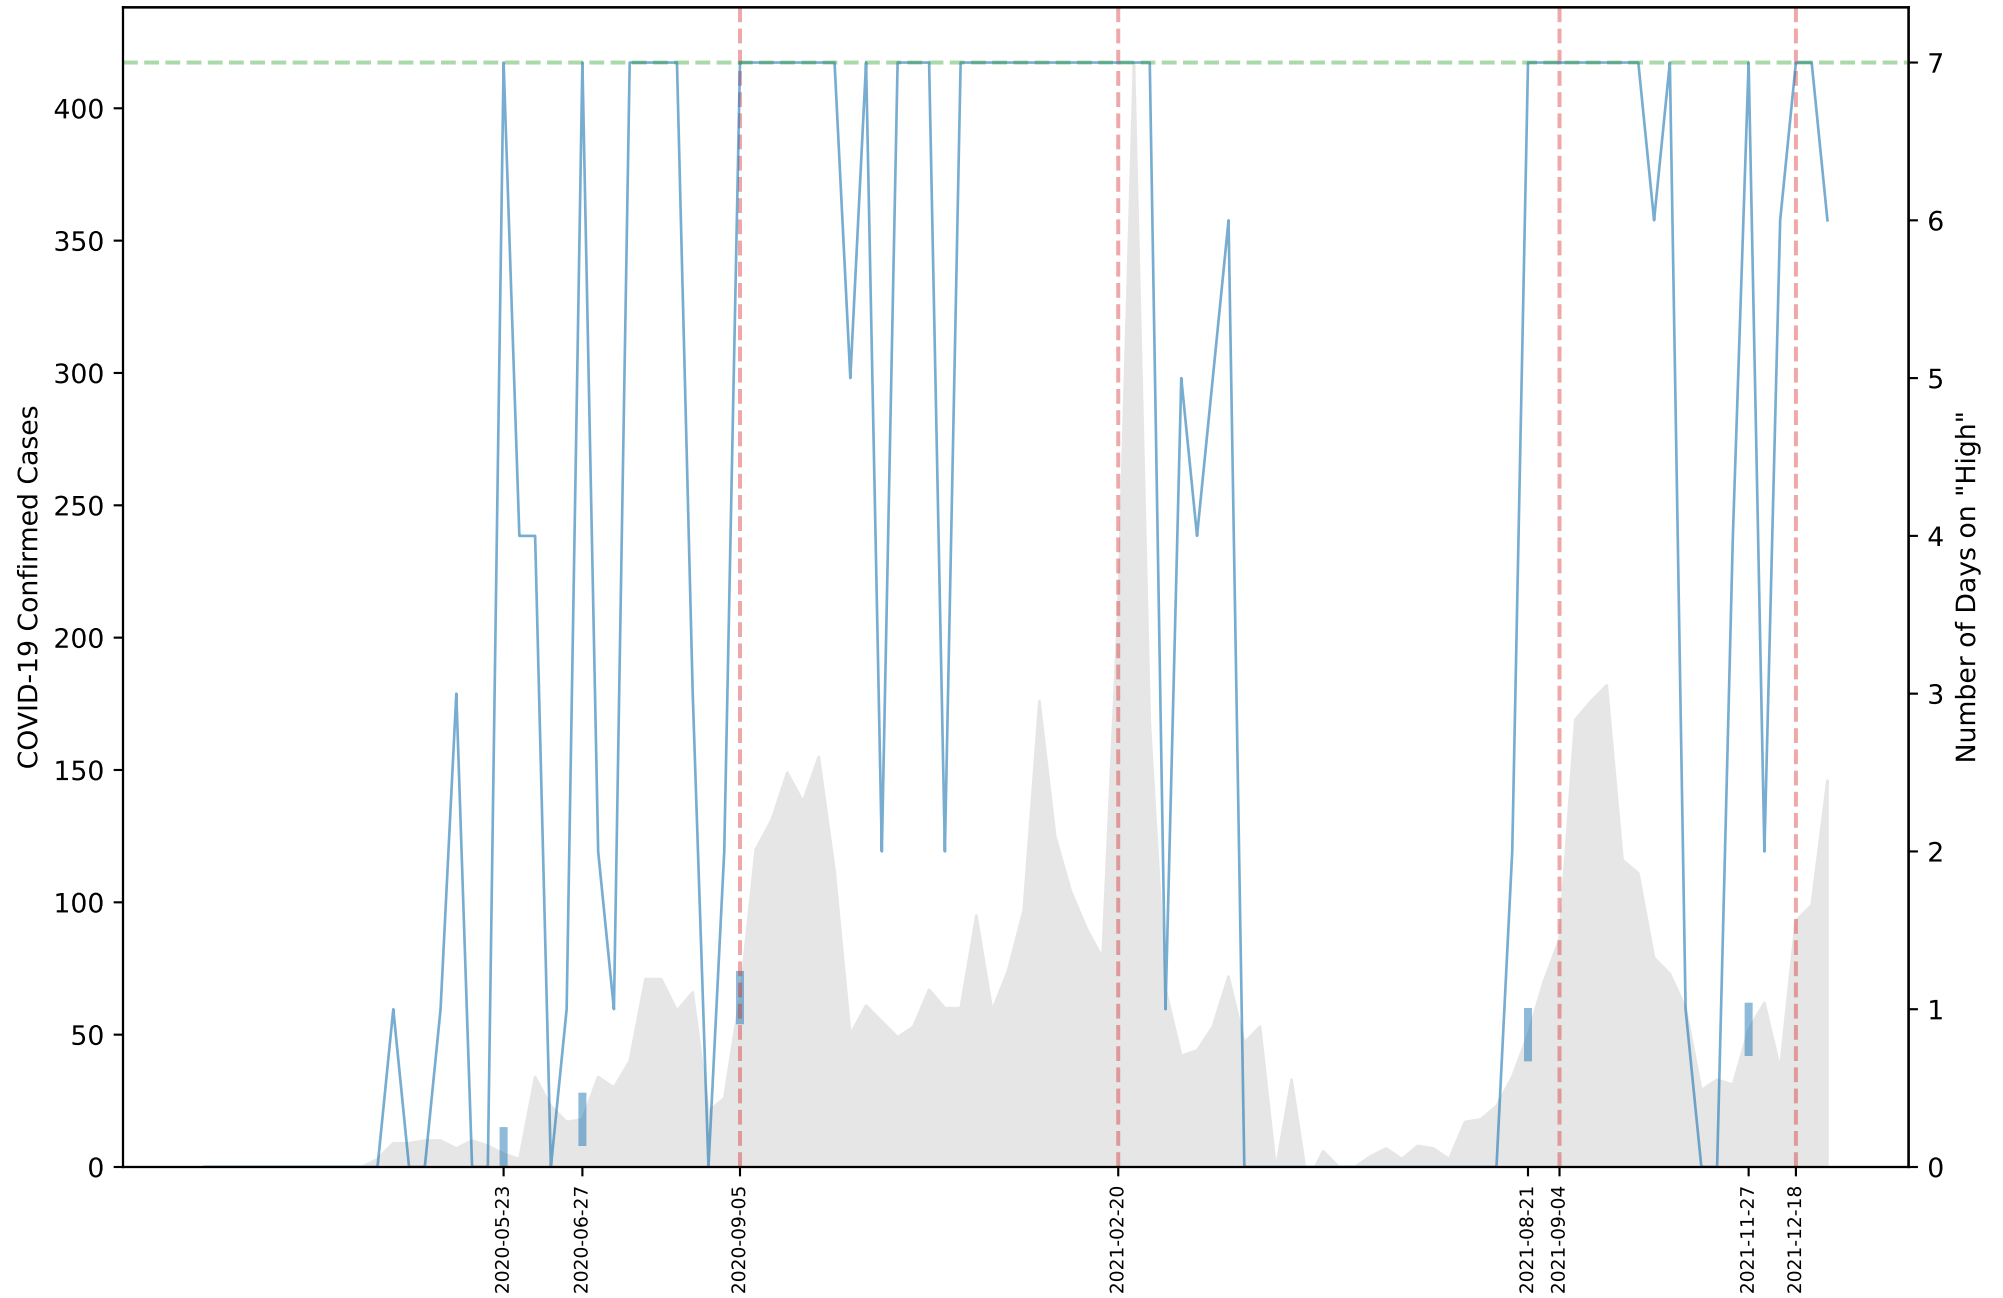

- Number of days on 'High' transmission per week
- - - Threshold to mark the beginning of epidemic event for CDC signal
- ▮ CDC beginning of events
- - -  $r_o$  (Parag's method)

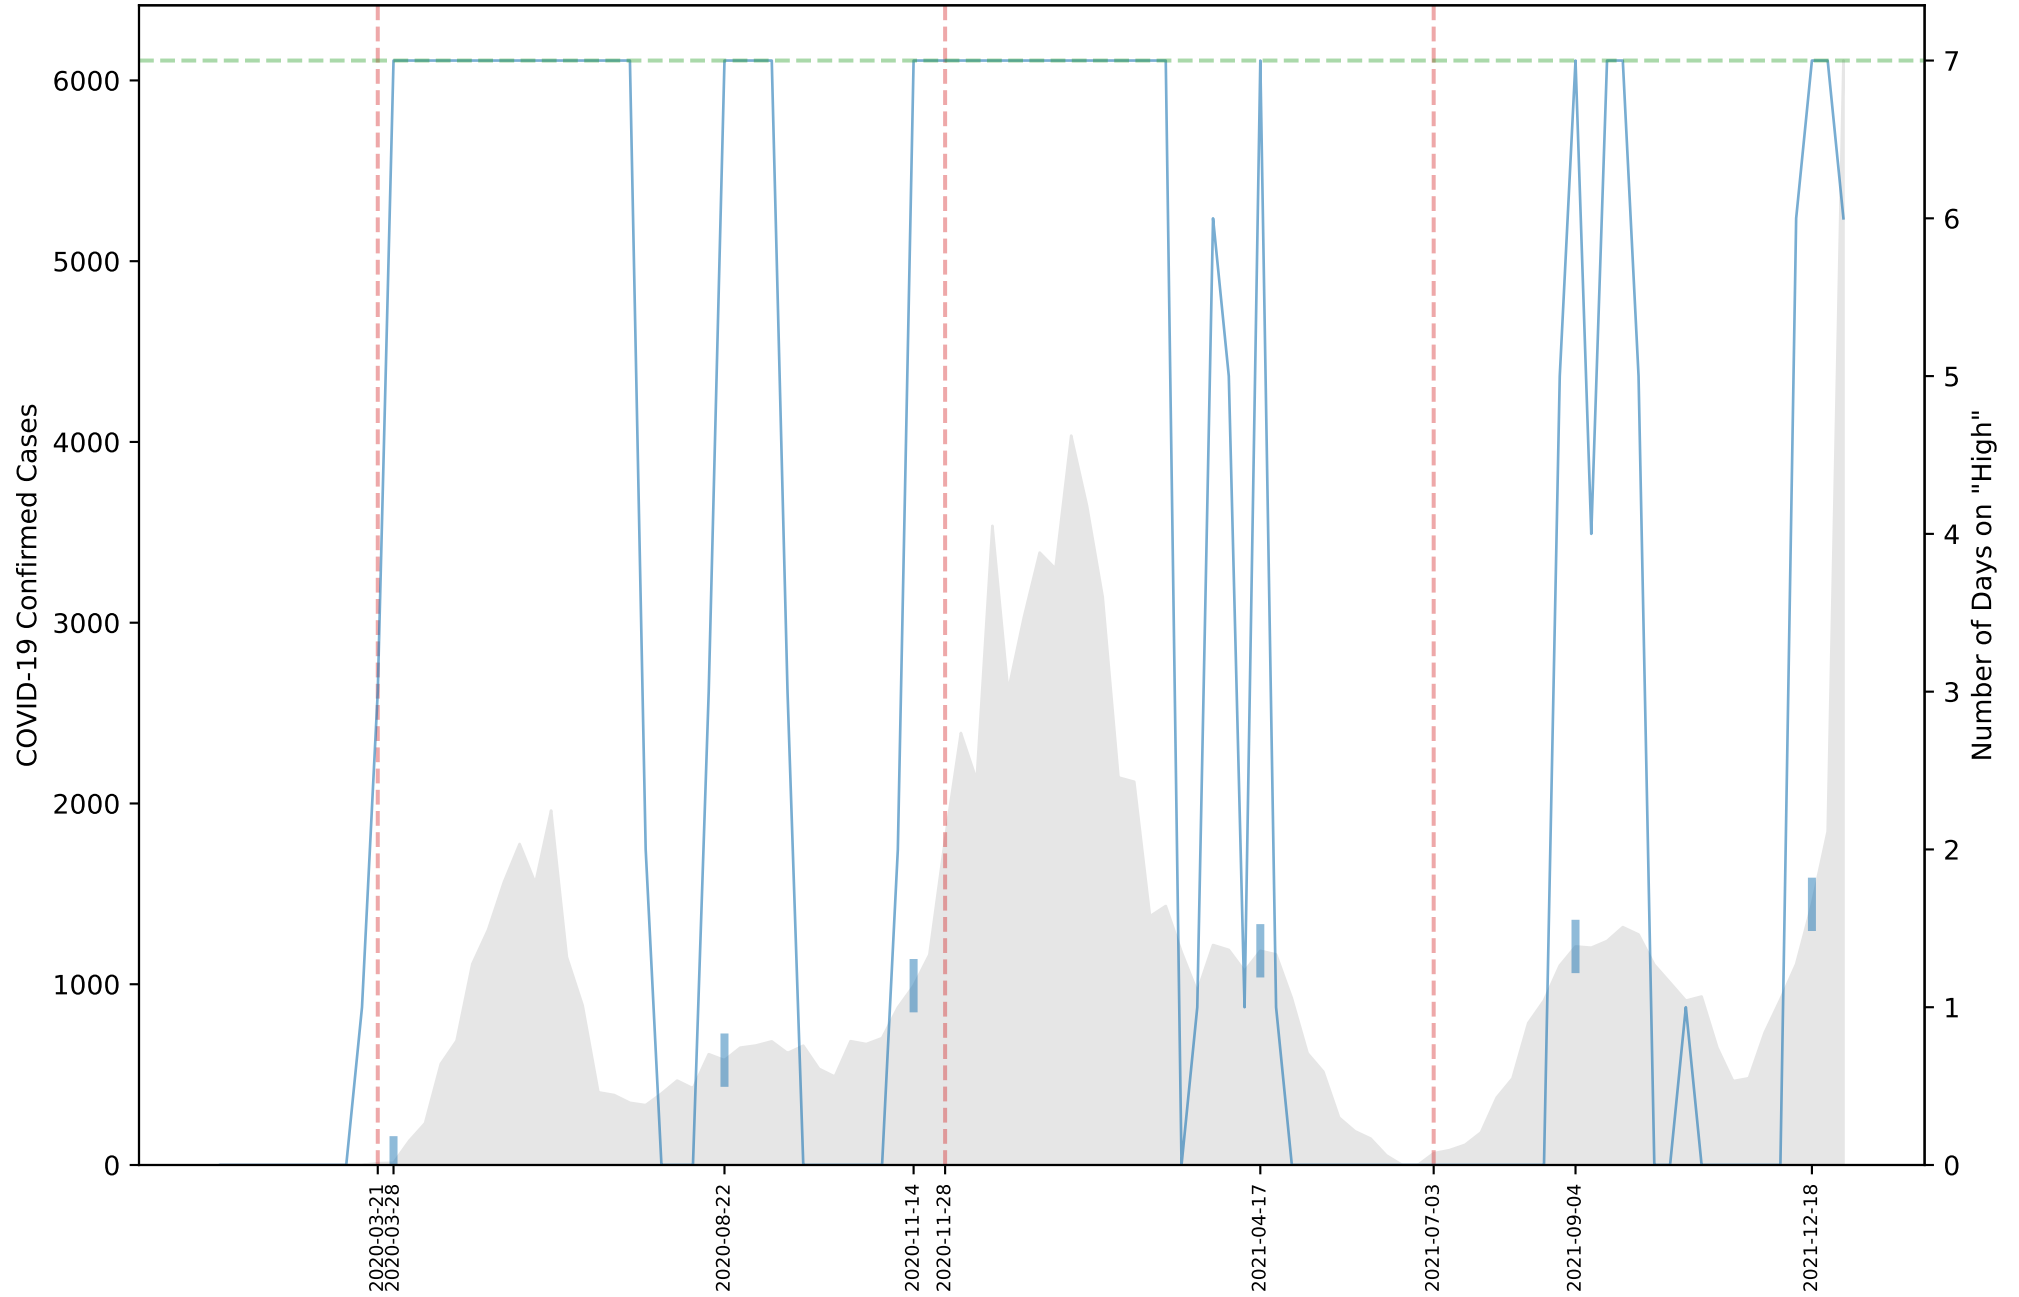

- Number of days on 'High' transmission per week
- - - Threshold to mark the beginning of epidemic event for CDC signal
- █ CDC beginning of events
- - -  $r_o$  (Parag's method)

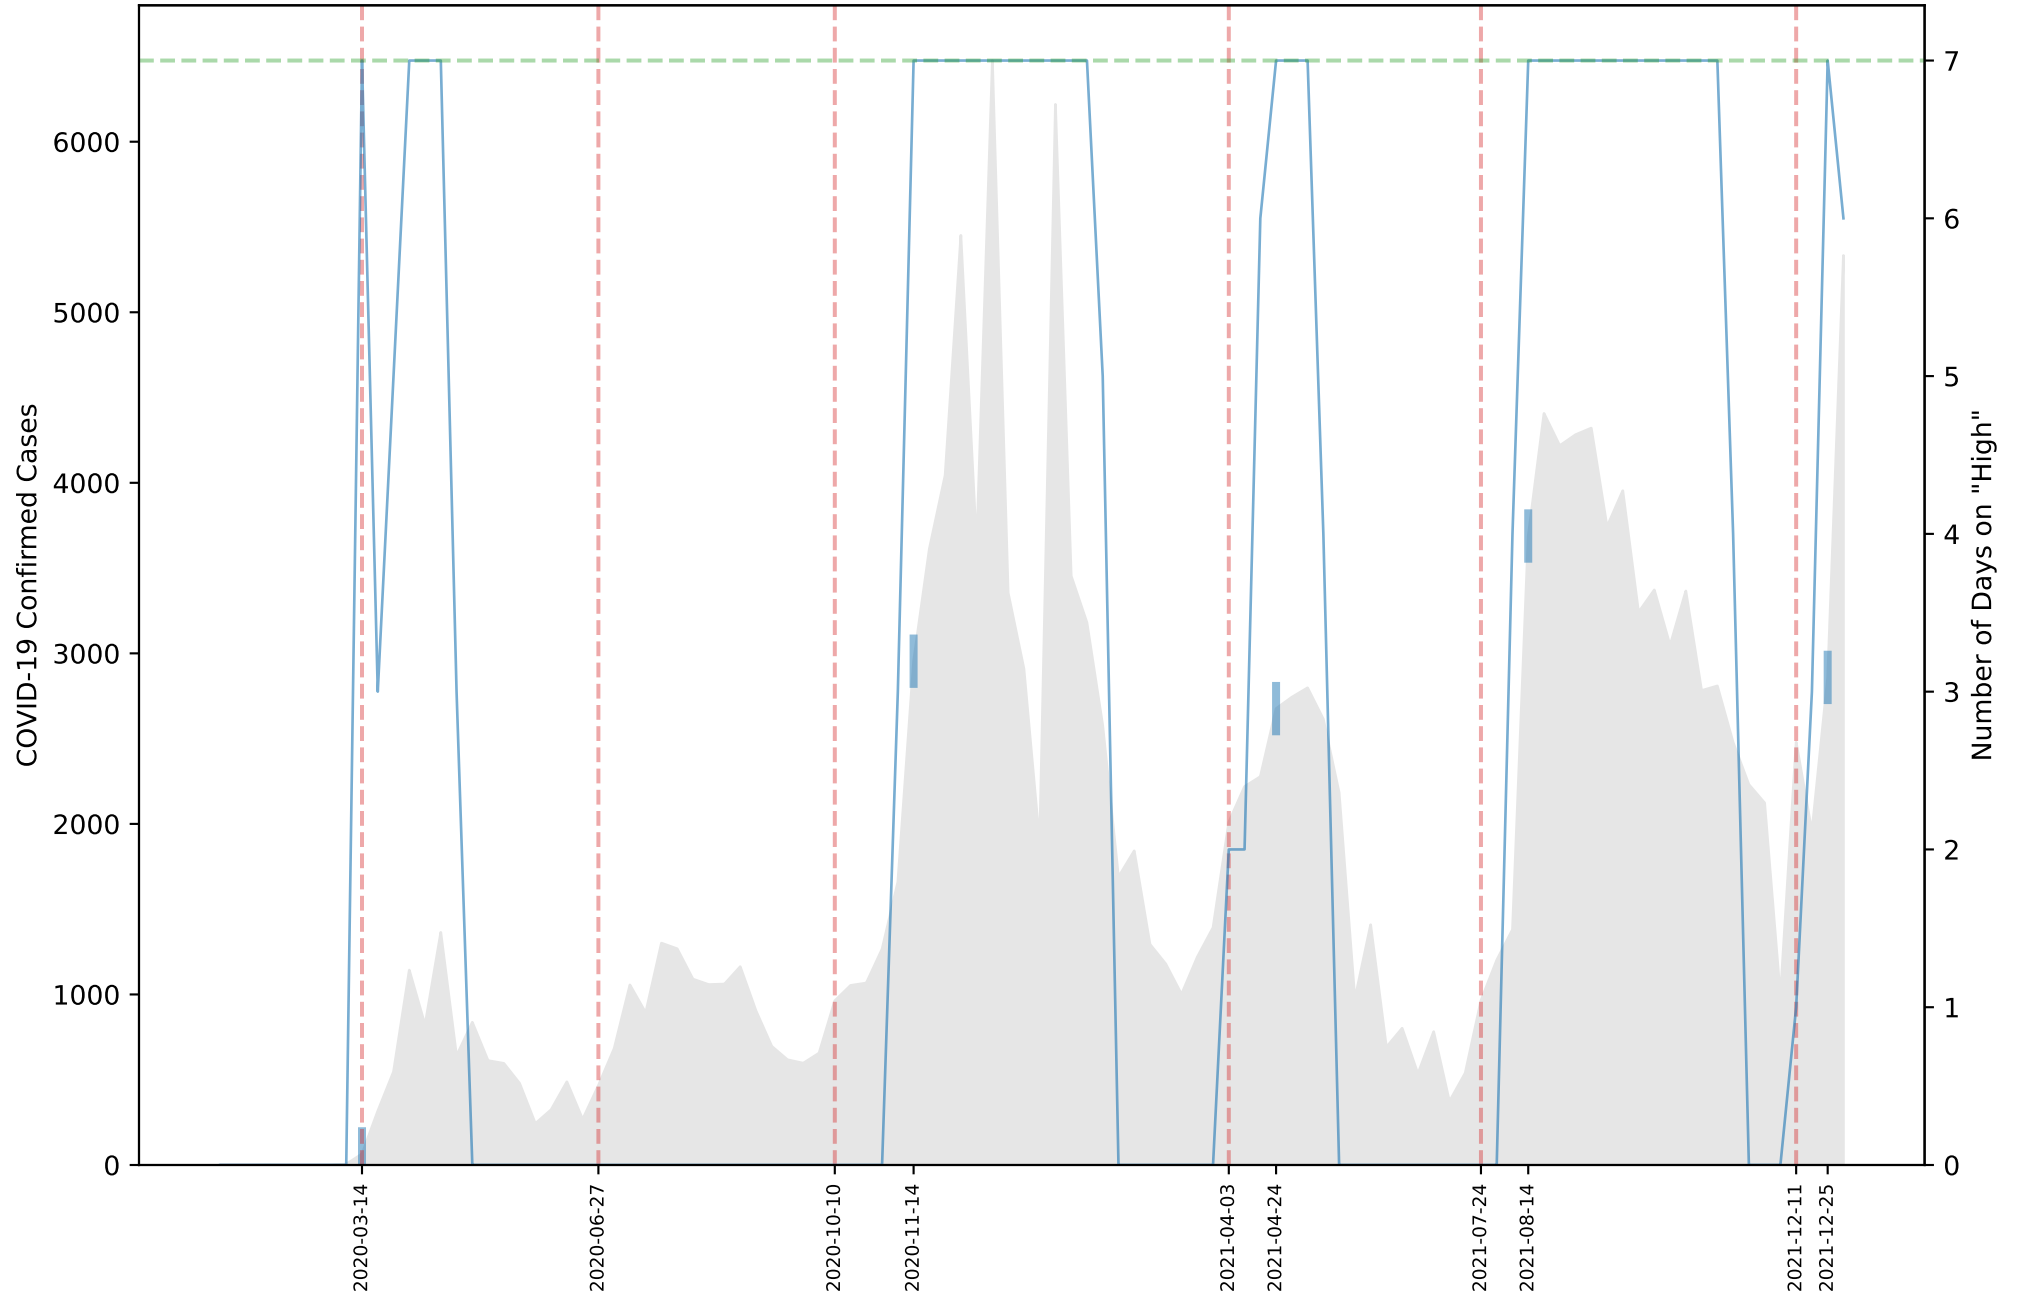



| Model Time                 | Naive             |                  |            | Single Source ("How long does covid last?") |                  |            | Single Source ("side effects of vaccine") |                  |            | Multiple Sources  |                  |            |
|----------------------------|-------------------|------------------|------------|---------------------------------------------|------------------|------------|-------------------------------------------|------------------|------------|-------------------|------------------|------------|
|                            | Before 2021-12-01 | After 2021-12-01 | Total      | Before 2021-12-01                           | After 2021-12-01 | Total      | Before 2021-12-01                         | After 2021-12-01 | Total      | Before 2021-12-01 | After 2021-12-01 | Total      |
| Total Events               | 305 (100%)        | 62 (100%)        | 367 (100%) | 305 (100%)                                  | 62 (100%)        | 367 (100%) | 305 (100%)                                | 62 (100%)        | 367 (100%) | 305 (100%)        | 62 (100%)        | 367 (100%) |
| Early Warning              | 279 (91%)         | 58 (94%)         | 337 (92%)  | 202 (66%)                                   | 35 (56%)         | 237 (65%)  | 184 (60%)                                 | 43 (69%)         | 227 (62%)  | 200 (66%)         | 54 (87%)         | 254 (69%)  |
| Sync Warning               | 19 (6%)           | 4 (6%)           | 23 (6%)    | 23 (8%)                                     | 2 (3%)           | 25 (7%)    | 16 (5%)                                   | 3 (5%)           | 19 (5%)    | 30 (10%)          | 0 (0%)           | 30 (8%)    |
| Late Warning               | 1 (0%)            | 0 (0%)           | 1 (0%)     | 26 (9%)                                     | 4 (6%)           | 30 (8%)    | 14 (5%)                                   | 1 (2%)           | 15 (4%)    | 26 (9%)           | 0 (0%)           | 26 (7%)    |
| Soft Warning               | 0 (0%)            | 0 (0%)           | 0 (0%)     | 0 (0%)                                      | 0 (0%)           | 0 (0%)     | 0 (0%)                                    | 0 (0%)           | 0 (0%)     | 39 (13%)          | 8 (13%)          | 47 (13%)   |
| Missed Outbreaks           | 6 (2%)            | 0 (0%)           | 6 (2%)     | 54 (18%)                                    | 21 (34%)         | 75 (20%)   | 91 (30%)                                  | 15 (24%)         | 106 (29%)  | 10 (3%)           | 0 (0%)           | 10 (3%)    |
| Warning, increase observed | 224               | 28               | 252        | 122                                         | 17               | 139        | 148                                       | 23               | 171        | 35                | 1                | 36         |
| False Alarm                | 502               | 110              | 612        | 280                                         | 47               | 327        | 374                                       | 105              | 479        | 95                | 15               | 110        |

Table S1: A Summary of the results at the county-level. Here *EWS* stands for Early Warning System.

| Model Time                 | Naive             |                  |            | Single Source ("How long does covid last?") |                  |            | Single Source ("chest pain") |                  |            | Multiple Sources  |                  |            |
|----------------------------|-------------------|------------------|------------|---------------------------------------------|------------------|------------|------------------------------|------------------|------------|-------------------|------------------|------------|
|                            | Before 2021-12-01 | After 2021-12-01 | Total      | Before 2021-12-01                           | After 2021-12-01 | Total      | Before 2021-12-01            | After 2021-12-01 | Total      | Before 2021-12-01 | After 2021-12-01 | Total      |
| Total Events               | 183 (100%)        | 19 (100%)        | 202 (100%) | 183 (100%)                                  | 19 (100%)        | 202 (100%) | 183 (100%)                   | 19 (100%)        | 202 (100%) | 183 (100%)        | 19 (100%)        | 202 (100%) |
| Early Warning              | 160 (87%)         | 18 (95%)         | 178 (88%)  | 115 (63%)                                   | 13 (68%)         | 128 (63%)  | 108 (59%)                    | 12 (63%)         | 120 (59%)  | 101 (55%)         | 18 (95%)         | 119 (59%)  |
| Sync Warning               | 22 (12%)          | 1 (5%)           | 23 (11%)   | 11 (6%)                                     | 2 (11%)          | 13 (6%)    | 12 (7%)                      | 0 (0%)           | 12 (6%)    | 16 (9%)           | 0 (0%)           | 16 (8%)    |
| Late Warning               | 1 (1%)            | 0 (0%)           | 1 (0%)     | 17 (9%)                                     | 1 (5%)           | 18 (9%)    | 12 (7%)                      | 0 (0%)           | 12 (6%)    | 20 (11%)          | 0 (0%)           | 20 (10%)   |
| Soft Warning               | 0 (0%)            | 0 (0%)           | 0 (0%)     | 0 (0%)                                      | 0 (0%)           | 0 (0%)     | 0 (0%)                       | 0 (0%)           | 0 (0%)     | 36 (20%)          | 1 (5%)           | 37 (18%)   |
| Missed Outbreaks           | 0 (0%)            | 0 (0%)           | 0 (0%)     | 40 (22%)                                    | 3 (16%)          | 43 (21%)   | 51 (28%)                     | 7 (37%)          | 58 (29%)   | 10 (5%)           | 0 (0%)           | 10 (5%)    |
| Warning, increase observed | 74                | 8                | 82         | 57                                          | 6                | 63         | 35                           | 6                | 41         | 18                | 0                | 18         |
| False Alarm                | 171               | 39               | 210        | 104                                         | 15               | 119        | 112                          | 9                | 121        | 23                | 1                | 24         |

Table S2: A Summary of the results at the state-level. Here *EWS* stands for Early Warning System.

| N = 367                       | Early Warning | Sync Warning | Late Warning | Missed Outbreaks | Warning, activity increases | False Alarm |
|-------------------------------|---------------|--------------|--------------|------------------|-----------------------------|-------------|
| (GT) how long does covid last | 237 (65%)     | 25 (7%)      | 30 (8%)      | 74 (20%)         | 139                         | 327         |
| (GT) side effects of vaccine  | 227 (62%)     | 19 (5%)      | 15 (4%)      | 105 (29%)        | 171                         | 479         |
| (GT) chest pain               | 201 (55%)     | 19 (5%)      | 38 (10%)     | 108 (29%)        | 128                         | 301         |
| (GT) covid 19Who              | 169 (46%)     | 25 (7%)      | 20 (5%)      | 152 (41%)        | 87                          | 269         |
| COVID-19 confirmed deaths     | 147 (40%)     | 16 (4%)      | 31 (8%)      | 172 (47%)        | 93                          | 249         |
| (GT) covidSymptoms            | 145 (40%)     | 30 (8%)      | 50 (14%)     | 141 (38%)        | 58                          | 122         |
| (GT) after covid vaccine      | 141 (38%)     | 20 (5%)      | 29 (8%)      | 176 (48%)        | 182                         | 463         |
| COVID-19 confirmed cases      | 135 (37%)     | 59 (16%)     | 58 (16%)     | 114 (31%)        | 100                         | 204         |
| (GT) effects of covid vaccine | 107 (29%)     | 14 (4%)      | 20 (5%)      | 225 (61%)        | 110                         | 374         |
| (GT) fever                    | 85 (23%)      | 24 (7%)      | 21 (6%)      | 236 (64%)        | 40                          | 107         |
| (GT) covid 19                 | 79 (22%)      | 22 (6%)      | 53 (14%)     | 212 (58%)        | 52                          | 127         |
| (gt) covid                    | 51 (14%)      | 19 (5%)      | 65 (18%)     | 231 (63%)        | 10                          | 54          |
| Twitter                       | 41 (11%)      | 14 (4%)      | 56 (15%)     | 255 (69%)        | 20                          | 40          |
| Up2Date                       | 37 (10%)      | 7 (2%)       | 24 (7%)      | 298 (81%)        | 10                          | 32          |

Table S3: County-Level results for the Single Source Method

| N=202                         | Early Warning | Sync Warning | Late Warning | Missed Outbreaks | Warning, activity increases | False Alarm |
|-------------------------------|---------------|--------------|--------------|------------------|-----------------------------|-------------|
| (GT) how long does covid last | 128 (63%)     | 13 (6%)      | 18 (9%)      | 42 (21%)         | 63                          | 119         |
| (GT) chest pain               | 120 (59%)     | 12 (6%)      | 12 (6%)      | 57 (28%)         | 41                          | 121         |
| (GT) covid 19Who              | 112 (55%)     | 11 (5%)      | 19 (9%)      | 59 (29%)         | 51                          | 104         |
| (GT) side effects of vaccine  | 96 (48%)      | 12 (6%)      | 18 (9%)      | 75 (37%)         | 56                          | 165         |
| (GT) covidSymptoms            | 88 (44%)      | 8 (4%)       | 15 (7%)      | 90 (45%)         | 28                          | 45          |
| COVID-19 confirmed cases      | 78 (39%)      | 22 (11%)     | 33 (16%)     | 68 (34%)         | 29                          | 97          |
| (GT) after covid vaccine      | 68 (34%)      | 8 (4%)       | 8 (4%)       | 117 (58%)        | 67                          | 149         |
| COVID-19 confirmed deaths     | 65 (32%)      | 13 (6%)      | 13 (6%)      | 110 (54%)        | 28                          | 72          |
| (GT) effects of covid vaccine | 63 (31%)      | 6 (3%)       | 7 (3%)       | 125 (62%)        | 30                          | 90          |
| (GT) covid 19                 | 46 (23%)      | 9 (4%)       | 30 (15%)     | 116 (57%)        | 21                          | 54          |
| (GT) fever                    | 45 (22%)      | 5 (2%)       | 15 (7%)      | 136 (67%)        | 24                          | 42          |
| Twitter                       | 27 (13%)      | 8 (4%)       | 28 (14%)     | 138 (68%)        | 10                          | 11          |
| (gt) covid                    | 26 (13%)      | 5 (2%)       | 21 (10%)     | 149 (74%)        | 10                          | 14          |
| Up2Date                       | 18 (9%)       | 5 (2%)       | 14 (7%)      | 164 (81%)        | 8                           | 9           |

**Table S4: State-Level results for the Single Source Method**

| Data Source(s) Used | Early Warning | Sync Warning | Late Warning | Soft Warning | Missed Outbreaks | Warning increase observed | False Alarm | Non-deployed |
|---------------------|---------------|--------------|--------------|--------------|------------------|---------------------------|-------------|--------------|
| G, T, A             | 120 (59%)     | 13 (6%)      | 24 (12%)     | 37 (18%)     | 8 (4%)           | 16                        | 32          | 0 (0%)       |
| L, G, T             | 119 (59%)     | 16 (8%)      | 20 (10%)     | 37 (18%)     | 10 (5%)          | 18                        | 24          | 0 (0%)       |
| L, G                | 119 (59%)     | 16 (8%)      | 19 (9%)      | 39 (19%)     | 9 (4%)           | 19                        | 24          | 0 (0%)       |
| G, T                | 118 (58%)     | 12 (6%)      | 25 (12%)     | 39 (19%)     | 8 (4%)           | 16                        | 26          | 0 (0%)       |
| G, T, A, U          | 118 (58%)     | 13 (6%)      | 24 (12%)     | 39 (19%)     | 8 (4%)           | 16                        | 32          | 0 (0%)       |
| G, A                | 117 (58%)     | 15 (7%)      | 24 (12%)     | 38 (19%)     | 8 (4%)           | 17                        | 31          | 0 (0%)       |
| G,                  | 117 (58%)     | 13 (6%)      | 24 (12%)     | 40 (20%)     | 8 (4%)           | 17                        | 27          | 0 (0%)       |
| G, T, U             | 116 (57%)     | 12 (6%)      | 27 (13%)     | 39 (19%)     | 8 (4%)           | 16                        | 28          | 0 (0%)       |
| G, A, U             | 116 (57%)     | 15 (7%)      | 23 (11%)     | 40 (20%)     | 8 (4%)           | 17                        | 32          | 0 (0%)       |
| L, G, U             | 116 (57%)     | 16 (8%)      | 20 (10%)     | 41 (20%)     | 9 (4%)           | 20                        | 24          | 0 (0%)       |
| L, G, T, U          | 116 (57%)     | 16 (8%)      | 21 (10%)     | 39 (19%)     | 10 (5%)          | 19                        | 25          | 0 (0%)       |
| L, G, T, A          | 115 (57%)     | 18 (9%)      | 20 (10%)     | 39 (19%)     | 10 (5%)          | 17                        | 31          | 0 (0%)       |
| G, U                | 115 (57%)     | 13 (6%)      | 26 (13%)     | 40 (20%)     | 8 (4%)           | 17                        | 27          | 0 (0%)       |
| L, G, A             | 114 (56%)     | 18 (9%)      | 20 (10%)     | 41 (20%)     | 9 (4%)           | 18                        | 29          | 0 (0%)       |
| L, G, T, A, U       | 114 (56%)     | 17 (8%)      | 19 (9%)      | 42 (21%)     | 10 (5%)          | 17                        | 30          | 0 (0%)       |
| L, G, A, U          | 113 (56%)     | 17 (8%)      | 19 (9%)      | 44 (22%)     | 9 (4%)           | 18                        | 29          | 0 (0%)       |
| G, N, T, A          | 110 (54%)     | 22 (11%)     | 24 (12%)     | 35 (17%)     | 11 (5%)          | 15                        | 29          | 0 (0%)       |
| G, N, T             | 109 (54%)     | 21 (10%)     | 25 (12%)     | 35 (17%)     | 12 (6%)          | 13                        | 24          | 0 (0%)       |
| G, N, A             | 109 (54%)     | 23 (11%)     | 23 (11%)     | 36 (18%)     | 11 (5%)          | 15                        | 29          | 0 (0%)       |
| G, N                | 108 (53%)     | 22 (11%)     | 24 (12%)     | 36 (18%)     | 12 (6%)          | 14                        | 23          | 0 (0%)       |
| G, N, T, A, U       | 108 (53%)     | 22 (11%)     | 24 (12%)     | 37 (18%)     | 11 (5%)          | 16                        | 28          | 0 (0%)       |
| G, N, T, U          | 107 (53%)     | 21 (10%)     | 25 (12%)     | 37 (18%)     | 12 (6%)          | 14                        | 23          | 0 (0%)       |
| L, G, N, T, A       | 107 (53%)     | 26 (13%)     | 21 (10%)     | 36 (18%)     | 12 (6%)          | 16                        | 28          | 0 (0%)       |
| G, N, A, U          | 107 (53%)     | 23 (11%)     | 23 (11%)     | 38 (19%)     | 11 (5%)          | 16                        | 28          | 0 (0%)       |
| L, G, N, A          | 106 (52%)     | 27 (13%)     | 20 (10%)     | 37 (18%)     | 12 (6%)          | 16                        | 28          | 0 (0%)       |
| G, N, U             | 106 (52%)     | 22 (11%)     | 24 (12%)     | 38 (19%)     | 12 (6%)          | 15                        | 22          | 0 (0%)       |
| L, G, N, T          | 104 (51%)     | 23 (11%)     | 24 (12%)     | 38 (19%)     | 13 (6%)          | 13                        | 23          | 0 (0%)       |
| L, G, N, T, A, U    | 104 (51%)     | 26 (13%)     | 21 (10%)     | 39 (19%)     | 12 (6%)          | 17                        | 27          | 0 (0%)       |
| L, G, N, A, U       | 103 (51%)     | 27 (13%)     | 20 (10%)     | 40 (20%)     | 12 (6%)          | 17                        | 27          | 0 (0%)       |
| L, G, N             | 103 (51%)     | 24 (12%)     | 23 (11%)     | 39 (19%)     | 13 (6%)          | 14                        | 22          | 0 (0%)       |
| L, G, N, T, U       | 101 (50%)     | 23 (11%)     | 24 (12%)     | 41 (20%)     | 13 (6%)          | 14                        | 22          | 0 (0%)       |
| L, G, N, U          | 100 (50%)     | 24 (12%)     | 23 (11%)     | 42 (21%)     | 13 (6%)          | 15                        | 21          | 0 (0%)       |
| L, T, A, U          | 86 (43%)      | 27 (13%)     | 18 (9%)      | 44 (22%)     | 21 (10%)         | 17                        | 60          | 6 (3%)       |
| L, A                | 85 (42%)      | 29 (14%)     | 8 (4%)       | 24 (12%)     | 38 (19%)         | 18                        | 58          | 18 (9%)      |
| L, T, A             | 84 (42%)      | 28 (14%)     | 17 (8%)      | 43 (21%)     | 22 (11%)         | 17                        | 61          | 8 (4%)       |
| L, A, U             | 81 (40%)      | 27 (13%)     | 8 (4%)       | 38 (19%)     | 36 (18%)         | 18                        | 58          | 12 (6%)      |
| T, A                | 80 (40%)      | 17 (8%)      | 15 (7%)      | 45 (22%)     | 32 (16%)         | 17                        | 58          | 13 (6%)      |
| T, A, U             | 80 (40%)      | 17 (8%)      | 16 (8%)      | 48 (24%)     | 30 (15%)         | 19                        | 55          | 11 (5%)      |
| L, N, A, U          | 79 (39%)      | 22 (11%)     | 21 (10%)     | 55 (27%)     | 24 (12%)         | 10                        | 26          | 1 (0%)       |
| N, A, U             | 79 (39%)      | 21 (10%)     | 17 (8%)      | 55 (27%)     | 29 (14%)         | 10                        | 29          | 1 (0%)       |
| N, T, A, U          | 79 (39%)      | 20 (10%)     | 16 (8%)      | 58 (29%)     | 28 (14%)         | 9                         | 23          | 1 (0%)       |
| L, T, U             | 79 (39%)      | 39 (19%)     | 27 (13%)     | 3 (1%)       | 26 (13%)         | 10                        | 20          | 28 (14%)     |
| N, T, A             | 77 (38%)      | 20 (10%)     | 15 (7%)      | 59 (29%)     | 28 (14%)         | 11                        | 24          | 3 (1%)       |
| N, A                | 77 (38%)      | 19 (9%)      | 16 (8%)      | 56 (28%)     | 30 (15%)         | 10                        | 27          | 4 (2%)       |
| L, N, A             | 76 (38%)      | 23 (11%)     | 21 (10%)     | 55 (27%)     | 23 (11%)         | 9                         | 25          | 4 (2%)       |
| L, N, T, A, U       | 76 (38%)      | 22 (11%)     | 21 (10%)     | 60 (30%)     | 22 (11%)         | 8                         | 22          | 1 (0%)       |
| A,                  | 75 (37%)      | 14 (7%)      | 5 (2%)       | 21 (10%)     | 57 (28%)         | 16                        | 56          | 30 (15%)     |
| A, U                | 73 (36%)      | 14 (7%)      | 7 (3%)       | 32 (16%)     | 53 (26%)         | 18                        | 58          | 23 (11%)     |
| L, N, T, A          | 73 (36%)      | 24 (12%)     | 21 (10%)     | 58 (29%)     | 23 (11%)         | 9                         | 23          | 3 (1%)       |
| L, T                | 72 (36%)      | 40 (20%)     | 28 (14%)     | 0 (0%)       | 23 (11%)         | 8                         | 22          | 39 (19%)     |
| T, U                | 67 (33%)      | 18 (9%)      | 37 (18%)     | 0 (0%)       | 36 (18%)         | 9                         | 21          | 44 (22%)     |
| N, T, U             | 65 (32%)      | 23 (11%)     | 19 (9%)      | 50 (25%)     | 38 (19%)         | 6                         | 16          | 7 (3%)       |
| L, N, T, U          | 63 (31%)      | 24 (12%)     | 24 (12%)     | 56 (28%)     | 28 (14%)         | 5                         | 15          | 7 (3%)       |
| L, N, U             | 62 (31%)      | 26 (13%)     | 25 (12%)     | 52 (26%)     | 30 (15%)         | 7                         | 15          | 7 (3%)       |
| N, U                | 62 (31%)      | 25 (12%)     | 21 (10%)     | 47 (23%)     | 40 (20%)         | 7                         | 17          | 7 (3%)       |
| N, T                | 60 (30%)      | 27 (13%)     | 18 (9%)      | 48 (24%)     | 39 (19%)         | 6                         | 15          | 10 (5%)      |
| N,                  | 59 (29%)      | 23 (11%)     | 19 (9%)      | 47 (23%)     | 43 (21%)         | 6                         | 15          | 11 (5%)      |
| L, N                | 58 (29%)      | 25 (12%)     | 24 (12%)     | 52 (26%)     | 32 (16%)         | 6                         | 13          | 11 (5%)      |
| T,                  | 56 (28%)      | 17 (8%)      | 39 (19%)     | 0 (0%)       | 32 (16%)         | 7                         | 19          | 58 (29%)     |
| L, N, T             | 56 (28%)      | 29 (14%)     | 24 (12%)     | 53 (26%)     | 30 (15%)         | 5                         | 13          | 10 (5%)      |
| L, U                | 37 (18%)      | 48 (24%)     | 13 (6%)      | 0 (0%)       | 43 (21%)         | 8                         | 9           | 61 (30%)     |
| L,                  | 23 (11%)      | 43 (21%)     | 10 (5%)      | 0 (0%)       | 21 (10%)         | 4                         | 6           | 105 (52%)    |
| U,                  | 17 (8%)       | 6 (3%)       | 6 (3%)       | 0 (0%)       | 49 (24%)         | 5                         | 3           | 124 (61%)    |

**Table S5: State-level performance (Jan 1st, 2020 – Jan 1st, 2022) of the Multiple Source method for different data sources used for the training step.** The source labeling is as follows: G = Google trends, T = Twitter, U = UpToDate, L = local epidemiological data, A = Human mobility from Apple, and N = Neighbor’s epidemiological data. An additional column, ‘Non-deployed,’ indicates the number of outbreak events where our Multiple Source method did not find a reasonable set of proxies to fit a model. Thus, an early warning system was not deployed to forecast the out-of-sample period.

| Data Source(s) Used | Early Warning | Sync Warning | Late Warning | Soft Warning | Missed Outbreaks | Warning increase observed | False Alarm | Non-deployed |
|---------------------|---------------|--------------|--------------|--------------|------------------|---------------------------|-------------|--------------|
| G, T, U             | 258 (70%)     | 21 (6%)      | 27 (7%)      | 52 (14%)     | 9 (2%)           | 36                        | 121         | 0 (0%)       |
| G, U                | 257 (70%)     | 21 (6%)      | 27 (7%)      | 53 (14%)     | 9 (2%)           | 36                        | 122         | 0 (0%)       |
| G, T                | 257 (70%)     | 20 (5%)      | 27 (7%)      | 54 (15%)     | 9 (2%)           | 36                        | 121         | 0 (0%)       |
| G                   | 256 (70%)     | 20 (5%)      | 28 (8%)      | 54 (15%)     | 9 (2%)           | 36                        | 121         | 0 (0%)       |
| G, T, A, U          | 255 (69%)     | 23 (6%)      | 28 (8%)      | 55 (15%)     | 6 (2%)           | 36                        | 121         | 0 (0%)       |
| L, G, T, U          | 254 (69%)     | 30 (8%)      | 26 (7%)      | 47 (13%)     | 10 (3%)          | 36                        | 110         | 0 (0%)       |
| G, A, U             | 254 (69%)     | 23 (6%)      | 28 (8%)      | 56 (15%)     | 6 (2%)           | 36                        | 122         | 0 (0%)       |
| L, G, T, A, U       | 253 (69%)     | 30 (8%)      | 27 (7%)      | 49 (13%)     | 8 (2%)           | 36                        | 113         | 0 (0%)       |
| L, G, T             | 253 (69%)     | 29 (8%)      | 26 (7%)      | 49 (13%)     | 10 (3%)          | 36                        | 111         | 0 (0%)       |
| G, T, A             | 253 (69%)     | 23 (6%)      | 28 (8%)      | 57 (16%)     | 6 (2%)           | 36                        | 120         | 0 (0%)       |
| L, G, U             | 252 (69%)     | 30 (8%)      | 26 (7%)      | 49 (13%)     | 10 (3%)          | 36                        | 111         | 0 (0%)       |
| G, A                | 252 (69%)     | 23 (6%)      | 29 (8%)      | 57 (16%)     | 6 (2%)           | 36                        | 120         | 0 (0%)       |
| L, G                | 251 (68%)     | 29 (8%)      | 27 (7%)      | 50 (14%)     | 10 (3%)          | 36                        | 111         | 0 (0%)       |
| L, G, A, U          | 251 (68%)     | 30 (8%)      | 27 (7%)      | 51 (14%)     | 8 (2%)           | 36                        | 114         | 0 (0%)       |
| L, G, T, A          | 250 (68%)     | 30 (8%)      | 27 (7%)      | 52 (14%)     | 8 (2%)           | 36                        | 112         | 0 (0%)       |
| L, G, A             | 248 (68%)     | 30 (8%)      | 28 (8%)      | 53 (14%)     | 8 (2%)           | 36                        | 112         | 0 (0%)       |
| G, N, T, U          | 234 (64%)     | 38 (10%)     | 38 (10%)     | 44 (12%)     | 13 (4%)          | 37                        | 94          | 0 (0%)       |
| G, N, U             | 234 (64%)     | 38 (10%)     | 38 (10%)     | 44 (12%)     | 13 (4%)          | 37                        | 95          | 0 (0%)       |
| G, N, T             | 233 (63%)     | 38 (10%)     | 38 (10%)     | 45 (12%)     | 13 (4%)          | 37                        | 93          | 0 (0%)       |
| G, N                | 233 (63%)     | 38 (10%)     | 39 (11%)     | 44 (12%)     | 13 (4%)          | 37                        | 93          | 0 (0%)       |
| G, N, A, U          | 232 (63%)     | 38 (10%)     | 38 (10%)     | 47 (13%)     | 12 (3%)          | 37                        | 96          | 0 (0%)       |
| G, N, T, A, U       | 232 (63%)     | 38 (10%)     | 38 (10%)     | 47 (13%)     | 12 (3%)          | 37                        | 95          | 0 (0%)       |
| G, N, A             | 231 (63%)     | 38 (10%)     | 39 (11%)     | 47 (13%)     | 12 (3%)          | 37                        | 94          | 0 (0%)       |
| G, N, T, A          | 231 (63%)     | 38 (10%)     | 38 (10%)     | 48 (13%)     | 12 (3%)          | 37                        | 94          | 0 (0%)       |
| L, G, N, A, U       | 230 (63%)     | 47 (13%)     | 34 (9%)      | 42 (11%)     | 14 (4%)          | 37                        | 93          | 0 (0%)       |
| L, G, N, T, A, U    | 230 (63%)     | 47 (13%)     | 34 (9%)      | 42 (11%)     | 14 (4%)          | 37                        | 92          | 0 (0%)       |
| L, G, N, U          | 230 (63%)     | 47 (13%)     | 35 (10%)     | 40 (11%)     | 15 (4%)          | 37                        | 91          | 0 (0%)       |
| L, G, N, T, U       | 230 (63%)     | 47 (13%)     | 35 (10%)     | 40 (11%)     | 15 (4%)          | 37                        | 90          | 0 (0%)       |
| L, G, N, A          | 229 (62%)     | 47 (13%)     | 35 (10%)     | 42 (11%)     | 14 (4%)          | 37                        | 91          | 0 (0%)       |
| L, G, N             | 229 (62%)     | 47 (13%)     | 36 (10%)     | 40 (11%)     | 15 (4%)          | 37                        | 89          | 0 (0%)       |
| L, G, N, T, A       | 229 (62%)     | 47 (13%)     | 34 (9%)      | 43 (12%)     | 14 (4%)          | 37                        | 91          | 0 (0%)       |
| L, G, N, T          | 229 (62%)     | 47 (13%)     | 35 (10%)     | 41 (11%)     | 15 (4%)          | 37                        | 89          | 0 (0%)       |
| L, N, T, U          | 148 (40%)     | 64 (17%)     | 44 (12%)     | 47 (13%)     | 34 (9%)          | 33                        | 67          | 30 (8%)      |
| L, N, T             | 147 (40%)     | 64 (17%)     | 45 (12%)     | 47 (13%)     | 32 (9%)          | 33                        | 67          | 32 (9%)      |
| L, N, U             | 145 (40%)     | 63 (17%)     | 44 (12%)     | 46 (13%)     | 38 (10%)         | 32                        | 65          | 31 (8%)      |
| L, N, T, A, U       | 143 (39%)     | 65 (18%)     | 38 (10%)     | 62 (17%)     | 45 (12%)         | 33                        | 69          | 14 (4%)      |
| L, N, T, A          | 141 (38%)     | 64 (17%)     | 39 (11%)     | 65 (18%)     | 43 (12%)         | 33                        | 70          | 15 (4%)      |
| L, N, A, U          | 140 (38%)     | 63 (17%)     | 38 (10%)     | 64 (17%)     | 47 (13%)         | 32                        | 68          | 15 (4%)      |
| L, N                | 140 (38%)     | 62 (17%)     | 43 (12%)     | 46 (13%)     | 31 (8%)          | 31                        | 63          | 45 (12%)     |
| N, T, U             | 138 (38%)     | 59 (16%)     | 43 (12%)     | 51 (14%)     | 36 (10%)         | 34                        | 68          | 40 (11%)     |
| N, T                | 137 (37%)     | 60 (16%)     | 44 (12%)     | 50 (14%)     | 33 (9%)          | 34                        | 68          | 43 (12%)     |
| N, U                | 135 (37%)     | 59 (16%)     | 43 (12%)     | 49 (13%)     | 40 (11%)         | 33                        | 66          | 41 (11%)     |
| L, N, A             | 135 (37%)     | 63 (17%)     | 38 (10%)     | 61 (17%)     | 50 (14%)         | 31                        | 66          | 20 (5%)      |
| N, T, A, U          | 133 (36%)     | 60 (16%)     | 37 (10%)     | 66 (18%)     | 51 (14%)         | 37                        | 69          | 20 (5%)      |
| N, T, A             | 132 (36%)     | 59 (16%)     | 38 (10%)     | 68 (19%)     | 48 (13%)         | 37                        | 70          | 22 (6%)      |
| N, A, U             | 131 (36%)     | 58 (16%)     | 37 (10%)     | 67 (18%)     | 53 (14%)         | 36                        | 68          | 21 (6%)      |
| L, T, A, U          | 130 (35%)     | 40 (11%)     | 17 (5%)      | 36 (10%)     | 82 (22%)         | 17                        | 50          | 62 (17%)     |
| N                   | 130 (35%)     | 58 (16%)     | 42 (11%)     | 49 (13%)     | 32 (9%)          | 32                        | 64          | 56 (15%)     |
| N, A                | 126 (34%)     | 58 (16%)     | 37 (10%)     | 64 (17%)     | 55 (15%)         | 35                        | 66          | 27 (7%)      |
| L, T, A             | 125 (34%)     | 41 (11%)     | 19 (5%)      | 33 (9%)      | 84 (23%)         | 22                        | 61          | 65 (18%)     |
| L, T, U             | 125 (34%)     | 51 (14%)     | 23 (6%)      | 3 (1%)       | 49 (13%)         | 16                        | 40          | 116 (32%)    |
| L, T                | 122 (33%)     | 51 (14%)     | 22 (6%)      | 1 (0%)       | 44 (12%)         | 19                        | 50          | 127 (35%)    |
| L, A, U             | 92 (25%)      | 44 (12%)     | 21 (6%)      | 37 (10%)     | 93 (25%)         | 17                        | 44          | 80 (22%)     |
| L, U                | 85 (23%)      | 56 (15%)     | 26 (7%)      | 1 (0%)       | 62 (17%)         | 14                        | 33          | 137 (37%)    |
| T, A, U             | 84 (23%)      | 9 (2%)       | 2 (1%)       | 21 (6%)      | 105 (29%)        | 14                        | 36          | 146 (40%)    |
| L, A                | 82 (22%)      | 46 (13%)     | 21 (6%)      | 29 (8%)      | 91 (25%)         | 16                        | 46          | 98 (27%)     |
| T, A                | 80 (22%)      | 7 (2%)       | 5 (1%)       | 19 (5%)      | 104 (28%)        | 14                        | 36          | 152 (41%)    |
| L                   | 75 (20%)      | 54 (15%)     | 24 (7%)      | 0 (0%)       | 42 (11%)         | 11                        | 32          | 172 (47%)    |
| T, U                | 69 (19%)      | 6 (2%)       | 7 (2%)       | 0 (0%)       | 27 (7%)          | 11                        | 19          | 258 (70%)    |
| T                   | 62 (17%)      | 6 (2%)       | 8 (2%)       | 0 (0%)       | 10 (3%)          | 10                        | 15          | 281 (77%)    |
| A, U                | 27 (7%)       | 3 (1%)       | 1 (0%)       | 24 (7%)      | 125 (34%)        | 7                         | 20          | 187 (51%)    |
| A                   | 20 (5%)       | 3 (1%)       | 1 (0%)       | 15 (4%)      | 106 (29%)        | 6                         | 21          | 222 (60%)    |
| U                   | 9 (2%)        | 2 (1%)       | 4 (1%)       | 0 (0%)       | 49 (13%)         | 2                         | 2           | 303 (83%)    |

**Table S6: County-level performance (Jan 1st, 2020 – Jan 1st, 2022) of the Multiple Sources method as a function of the data sources used as input .** The source labeling is as follows: G = Google trends, T = Twitter, U = UpToDate, L = local epidemiological data, A = Human mobility from Apple, and N = Neighbor’s epidemiological data. An additional column, ‘Non-deployed,’ indicates the number of outbreak events where our Multiple Source method did not find a reasonable set of proxies to fit a model. Thus, an early warning system was not deployed to forecast the out-of-sample period.

|                     | Naive | Single Source<br>“How long does covid last?” | Single Source<br>“side effects of vaccine” | Multiple Sources |
|---------------------|-------|----------------------------------------------|--------------------------------------------|------------------|
| Early               | 0.64  | 0.58                                         | 0.68                                       | 0.30             |
| Early + Sync        | 0.63  | 0.56                                         | 0.66                                       | 0.28             |
| Early + Sync + Late | 0.63  | 0.56                                         | 0.66                                       | 0.28             |

Table S7: False Discovery Rates (FDR) for each methodology at the county-level. Each row shows the FDR with the inclusion of different warning signals (early, sync, or late).

|                     | Naive | Single Source<br>“How long does covid last?” | Single Source<br>“chest pain” | Multiple Sources |
|---------------------|-------|----------------------------------------------|-------------------------------|------------------|
| Early               | 0.54  | 0.48                                         | 0.50                          | 0.17             |
| Early + Sync        | 0.51  | 0.46                                         | 0.48                          | 0.15             |
| Early + Sync + Late | 0.51  | 0.46                                         | 0.48                          | 0.15             |

Table S8: False Discovery Rates (FDR) for each methodology at the state-level. Each row shows the FDR with the inclusion of different warning signals (early, sync, or late).

---



---

|                          |                     |                |                         |                          |
|--------------------------|---------------------|----------------|-------------------------|--------------------------|
| Abdominal pain           | Acute bronchitis    | Ageusia        | Anosmia                 | Anxiety                  |
| Asphyxia                 | Asthma              | Bronchitis     | Burning Chest Pain      | Cardiac arrest           |
| Chest pain               | Chills              | Chronic pain   | Cough                   | Diarrhea                 |
| Dizziness                | Dysgeusia           | Fatigue        | Fever                   | Hyperventilation         |
| Nasal congestion         | Otitis              | Phlegm         | Pneumonia               | Shortness of breath      |
| Sore throat              | Throat irritation   | Vertigo        | Viral pneumonia         | Vomiting                 |
| Wheeze                   | after covid vaccine | anosmia        | chest pain              | chest tightness          |
| covid                    | covid nhs           | covid symptoms | covid-19                | covid-19 who             |
| effects of covid vaccine | feeling exhausted   | feeling tired  | fever                   | how long does covid last |
| joints aching            | loss of smell       | loss smell     | loss taste              | nose bleed               |
| quarantine               | sars-cov 2          | sars-cov-2     | side effects of vaccine |                          |

---

Table S9: Google Search term list used in the Multiple Source method
